# Supplementary material for: Distinct oligodendrocyte populations have spatial preference and different responses to spinal cord injury
Source: PubMed Central journal article supplement (PMC7673029; doi:10.1038/s41467-020-19453-x), 2020-11-17
Supplement: 41467_2020_19453_MOESM8_ESM.pdf [file 41467_2020_19453_MOESM8_ESM.pdf]

## Info

Differential expression using Wilcoxon rank sum test of all mature OL populations

|         |                        |
|---------|------------------------|
| IS      | Injury Site            |
| WD      | Wallerian Degeneration |
| Control | No Injury              |

All differential expression is limited to the mature oligodendrocyte populations.  
Fig 6 e is based on information shown in the tables on the first two sheets.

### Meaning of the columns

|           |                                                                                      |
|-----------|--------------------------------------------------------------------------------------|
| Column 1  | Gene names                                                                           |
| p_val     | p-value calculated using wilcoxon rank sum test                                      |
| avg_logFC | Log Fold change of the tested group                                                  |
| pct.1     | Percent of cells expressing a given gene (referring to the first mention condition)  |
| pct.2     | Percent of cells expressing a given gene (referring to the second mention condition) |
| p_val_adj | FDR adjusted p-value                                                                 |

|          | p_val    | avg_logFC | pct.1 | pct.2 | p_val_adj |
|----------|----------|-----------|-------|-------|-----------|
| B2m      | 1,35E-85 | 1,316538  | 0,949 | 0,462 | 2,13E-81  |
| Aplp1    | 5,54E-84 | -0,42917  | 1     | 1     | 8,74E-80  |
| Fos      | 1,22E-74 | 2,051599  | 0,905 | 0,403 | 1,92E-70  |
| H2-D1    | 7,84E-68 | 1,288385  | 0,917 | 0,538 | 1,24E-63  |
| Egr1     | 2,27E-64 | 2,302329  | 0,58  | 0,076 | 3,58E-60  |
| Gng11    | 1,5E-62  | -0,80159  | 0,949 | 0,985 | 2,37E-58  |
| Etv1     | 1,88E-58 | -0,69559  | 0,914 | 0,975 | 2,97E-54  |
| Ppp1r14a | 3,9E-58  | -0,53524  | 0,985 | 0,996 | 6,16E-54  |
| Junb     | 7,49E-53 | 1,440736  | 0,679 | 0,234 | 1,18E-48  |
| S100a16  | 1,08E-50 | -0,59729  | 0,95  | 0,989 | 1,71E-46  |
| AY036118 | 1,16E-50 | 0,61499   | 0,998 | 0,901 | 1,83E-46  |
| Gpc1     | 1,68E-47 | 0,644288  | 0,778 | 0,392 | 2,65E-43  |
| Gstm7    | 4,97E-47 | -0,63021  | 0,829 | 0,932 | 7,85E-43  |
| Epb41l3  | 2,95E-45 | -0,49267  | 0,916 | 0,981 | 4,65E-41  |
| Mag      | 2,49E-44 | -0,33759  | 0,998 | 0,998 | 3,92E-40  |
| C4b      | 5,49E-44 | 0,656461  | 0,998 | 0,679 | 8,66E-40  |
| Apoe     | 4,38E-43 | -1,19405  | 0,95  | 0,975 | 6,91E-39  |
| Shisa4   | 5,62E-43 | -0,53093  | 0,963 | 0,985 | 8,86E-39  |
| Mt1      | 7,73E-43 | 0,913011  | 0,974 | 0,884 | 1,22E-38  |
| Gstm5    | 1,42E-42 | -0,55791  | 0,921 | 0,979 | 2,24E-38  |
| Prdx1    | 1,44E-42 | -0,41059  | 1     | 0,998 | 2,27E-38  |
| Tfrc     | 1,97E-42 | -0,4076   | 0,182 | 0,616 | 3,1E-38   |
| Pdlim2   | 5,67E-42 | -0,57112  | 0,949 | 0,992 | 8,95E-38  |
| Hmgcs1   | 6,46E-42 | 1,002654  | 0,969 | 0,901 | 1,02E-37  |
| Dhcr24   | 1,5E-41  | 0,757997  | 0,734 | 0,403 | 2,36E-37  |
| Tmsb4x   | 2,82E-41 | -0,42292  | 1     | 0,998 | 4,45E-37  |
| Spock3   | 3,99E-41 | -0,64991  | 0,793 | 0,901 | 6,29E-37  |
| Nipa1    | 8,77E-41 | -0,44135  | 0,873 | 0,966 | 1,38E-36  |
| Pex5l    | 3,67E-40 | -0,65982  | 0,954 | 0,983 | 5,79E-36  |
| Fez1     | 3,77E-40 | -0,39361  | 0,998 | 0,998 | 5,94E-36  |
| Stmn1    | 4,17E-40 | -0,37432  | 1     | 0,996 | 6,57E-36  |
| Car2     | 1,01E-39 | -0,39932  | 1     | 1     | 1,59E-35  |
| Sept7    | 1,77E-39 | -0,43243  | 0,998 | 0,998 | 2,79E-35  |
| Bcas1    | 8,34E-39 | 0,6361    | 0,985 | 0,958 | 1,32E-34  |
| Fth1     | 1,13E-38 | -0,34139  | 1     | 1     | 1,78E-34  |
| Cox6c    | 1,65E-38 | -0,3622   | 0,987 | 0,996 | 2,6E-34   |
| Tulp4    | 2,29E-38 | 0,414611  | 1     | 0,998 | 3,61E-34  |
| Bmyc     | 9,37E-38 | -0,51756  | 0,538 | 0,831 | 1,48E-33  |
| Psat1    | 1,75E-37 | -0,43398  | 0,95  | 0,983 | 2,77E-33  |
| Cisd1    | 1,87E-37 | -0,42041  | 0,818 | 0,954 | 2,95E-33  |
| Ywhaq    | 1,89E-37 | -0,33786  | 1     | 0,998 | 2,98E-33  |
| Rida     | 2,65E-37 | -0,48886  | 0,288 | 0,675 | 4,18E-33  |
| Atg4c    | 9,69E-37 | -0,42006  | 0,248 | 0,633 | 1,53E-32  |
| H2-K1    | 1,36E-36 | 0,894032  | 0,659 | 0,329 | 2,14E-32  |
| Mif      | 1,43E-36 | -0,53765  | 0,839 | 0,935 | 2,25E-32  |
| Nap1l5   | 1,84E-36 | -0,5428   | 0,774 | 0,922 | 2,91E-32  |
| Cyp2j6   | 5,24E-36 | -0,46209  | 0,127 | 0,479 | 8,26E-32  |
| Tmeff1   | 1,04E-35 | -0,47199  | 0,884 | 0,96  | 1,64E-31  |
| Ndufa4   | 1,19E-35 | -0,37524  | 0,961 | 0,985 | 1,88E-31  |
| Grhpr    | 1,6E-35  | -0,48985  | 0,477 | 0,795 | 2,53E-31  |
| Snrpn    | 2,92E-35 | -0,49061  | 0,67  | 0,88  | 4,6E-31   |

|          |          |          |       |       |          |
|----------|----------|----------|-------|-------|----------|
| Fis1     | 7,88E-35 | -0,35198 | 0,987 | 0,985 | 1,24E-30 |
| Ankub1   | 1,82E-34 | -0,4251  | 0,185 | 0,553 | 2,87E-30 |
| Glo1     | 2,81E-34 | -0,42907 | 0,774 | 0,924 | 4,43E-30 |
| Bpgm     | 5,54E-34 | -0,36731 | 0,956 | 0,994 | 8,74E-30 |
| Ncam1    | 7,54E-34 | 0,346163 | 1     | 0,998 | 1,19E-29 |
| Psap     | 1,69E-33 | 0,328534 | 1     | 0,998 | 2,67E-29 |
| Tmem258  | 1,72E-33 | -0,48488 | 0,868 | 0,939 | 2,71E-29 |
| Eml1     | 1,82E-33 | -0,58699 | 0,563 | 0,808 | 2,88E-29 |
| Jun      | 2,46E-33 | 1,201086 | 0,947 | 0,814 | 3,87E-29 |
| Calm1    | 2,49E-33 | -0,32878 | 0,998 | 0,998 | 3,93E-29 |
| Mpc1     | 1,88E-32 | -0,35837 | 0,978 | 0,987 | 2,97E-28 |
| Ldlr     | 2,45E-32 | 0,87837  | 0,576 | 0,274 | 3,87E-28 |
| Brd2     | 3,1E-32  | 0,574949 | 0,888 | 0,757 | 4,89E-28 |
| Aspa     | 7,13E-32 | -0,35228 | 0,974 | 0,994 | 1,12E-27 |
| Gab1     | 8,17E-32 | 0,415996 | 0,98  | 0,949 | 1,29E-27 |
| Chchd2   | 8,98E-32 | -0,29595 | 0,998 | 0,998 | 1,42E-27 |
| Apod     | 9,19E-32 | -0,57425 | 1     | 0,996 | 1,45E-27 |
| Hint1    | 1,75E-31 | -0,36086 | 0,963 | 0,979 | 2,76E-27 |
| Sept4    | 2,51E-31 | -0,3794  | 1     | 0,996 | 3,96E-27 |
| Gpm6b    | 4,29E-31 | -0,27775 | 1     | 1     | 6,77E-27 |
| Gfap     | 7,29E-31 | -0,35871 | 0,075 | 0,371 | 1,15E-26 |
| Mog      | 7,87E-31 | -0,29993 | 0,996 | 0,998 | 1,24E-26 |
| Vmp1     | 1,12E-30 | -0,35602 | 0,971 | 0,989 | 1,77E-26 |
| Ctsk     | 1,9E-30  | -0,37331 | 0,207 | 0,553 | 3E-26    |
| Kctd13   | 2,19E-30 | -0,36847 | 0,971 | 0,989 | 3,46E-26 |
| Fosb     | 3,55E-30 | 1,187103 | 0,382 | 0,082 | 5,6E-26  |
| Selenof  | 4,39E-30 | -0,304   | 0,969 | 0,973 | 6,93E-26 |
| Ppia     | 6,59E-30 | -0,29928 | 1     | 1     | 1,04E-25 |
| Pkp4     | 8,34E-30 | 0,478827 | 0,917 | 0,743 | 1,32E-25 |
| Fam102a  | 1,16E-29 | 0,409564 | 0,965 | 0,878 | 1,83E-25 |
| Sdf2l1   | 1,74E-29 | -0,36804 | 0,22  | 0,559 | 2,74E-25 |
| Trf      | 2,01E-29 | -0,35352 | 1     | 1     | 3,17E-25 |
| Aldoc    | 2,21E-29 | -0,66007 | 0,132 | 0,441 | 3,48E-25 |
| Oaz1     | 3,97E-29 | -0,31231 | 0,991 | 0,989 | 6,26E-25 |
| Arhgap23 | 4,82E-29 | 0,366525 | 0,993 | 0,958 | 7,61E-25 |
| Scarb2   | 7,87E-29 | 0,367772 | 1     | 0,983 | 1,24E-24 |
| Egr2     | 8,27E-29 | 0,890041 | 0,279 | 0,023 | 1,3E-24  |
| Agpat4   | 8,93E-29 | -0,31295 | 0,987 | 0,998 | 1,41E-24 |
| Cyp27a1  | 1,03E-28 | -0,4453  | 0,273 | 0,603 | 1,63E-24 |
| Srebf2   | 1,14E-28 | 0,442227 | 0,897 | 0,781 | 1,8E-24  |
| Sptbn1   | 1,29E-28 | 0,394144 | 0,985 | 0,928 | 2,03E-24 |
| Gsn      | 1,94E-28 | -0,65144 | 0,954 | 0,949 | 3,06E-24 |
| Plekhb1  | 1,96E-28 | 0,392221 | 1     | 0,996 | 3,1E-24  |
| Socs3    | 2,27E-28 | 0,765137 | 0,426 | 0,127 | 3,59E-24 |
| Sparc    | 3,58E-28 | 0,493102 | 0,943 | 0,73  | 5,65E-24 |
| Klhl4    | 4,47E-28 | -0,40261 | 0,549 | 0,819 | 7,05E-24 |
| Atp5f1   | 6,19E-28 | -0,33611 | 0,919 | 0,97  | 9,76E-24 |
| Cfl1     | 6,51E-28 | -0,24513 | 1     | 0,998 | 1,03E-23 |
| Erbin    | 6,95E-28 | 0,460188 | 0,985 | 0,939 | 1,1E-23  |
| Tmem125  | 7,48E-28 | -0,39192 | 0,717 | 0,905 | 1,18E-23 |
| Tcf4     | 7,91E-28 | 0,341555 | 0,998 | 0,992 | 1,25E-23 |
| Spcs1    | 1,62E-27 | -0,35064 | 0,868 | 0,93  | 2,55E-23 |

|           |          |          |       |       |          |
|-----------|----------|----------|-------|-------|----------|
| Inf2      | 2,03E-27 | 0,384083 | 0,991 | 0,941 | 3,2E-23  |
| Tspan7    | 2,23E-27 | -0,37725 | 0,259 | 0,576 | 3,52E-23 |
| Mid1ip1   | 3,04E-27 | -0,42946 | 0,941 | 0,968 | 4,8E-23  |
| Omg       | 3,2E-27  | -0,42873 | 0,666 | 0,865 | 5,05E-23 |
| Cd81      | 3,87E-27 | -0,31255 | 1     | 0,998 | 6,1E-23  |
| Uqcr10    | 4,5E-27  | -0,3066  | 0,938 | 0,973 | 7,09E-23 |
| Serpind1  | 5,23E-27 | -0,46319 | 0,083 | 0,354 | 8,25E-23 |
| Ier2      | 6,47E-27 | 0,880627 | 0,312 | 0,051 | 1,02E-22 |
| Paip2     | 1,09E-26 | -0,28933 | 0,939 | 0,985 | 1,71E-22 |
| Serf2     | 1,75E-26 | -0,26677 | 0,994 | 0,994 | 2,75E-22 |
| Fam171b   | 4,82E-26 | -0,35232 | 0,93  | 0,981 | 7,61E-22 |
| Mt2       | 6,07E-26 | 0,763622 | 0,4   | 0,122 | 9,57E-22 |
| Ndr2      | 7,95E-26 | -0,36604 | 0,128 | 0,42  | 1,25E-21 |
| Itih3     | 1,16E-25 | -0,34712 | 0,088 | 0,357 | 1,83E-21 |
| Dusp15    | 1,16E-25 | -0,4558  | 0,437 | 0,728 | 1,84E-21 |
| Qdpr      | 1,42E-25 | -0,47805 | 0,993 | 0,987 | 2,25E-21 |
| Atf4      | 1,63E-25 | 0,507464 | 0,829 | 0,648 | 2,57E-21 |
| Itm2b     | 1,95E-25 | -0,24332 | 1     | 0,998 | 3,07E-21 |
| Abca2     | 2,05E-25 | 0,295968 | 0,998 | 0,998 | 3,24E-21 |
| Sqle      | 2,2E-25  | 0,601407 | 0,761 | 0,551 | 3,47E-21 |
| Agmo      | 2,64E-25 | -0,36631 | 0,196 | 0,506 | 4,17E-21 |
| Ptms      | 2,88E-25 | 0,452172 | 0,903 | 0,749 | 4,54E-21 |
| Gatm      | 3,84E-25 | -0,24826 | 1     | 0,998 | 6,06E-21 |
| Atxn7l3b  | 4,33E-25 | -0,28598 | 0,967 | 0,992 | 6,83E-21 |
| Hnrnp1    | 5,64E-25 | 0,423516 | 0,899 | 0,772 | 8,9E-21  |
| Cox5b     | 6,99E-25 | -0,28542 | 0,965 | 0,981 | 1,1E-20  |
| Eif1      | 7,97E-25 | -0,24867 | 1     | 1     | 1,26E-20 |
| Dnah14    | 1,24E-24 | -0,37507 | 0,105 | 0,376 | 1,96E-20 |
| Hist1h2bc | 1,31E-24 | -0,41047 | 0,807 | 0,922 | 2,06E-20 |
| Rnf130    | 1,31E-24 | -0,29214 | 0,963 | 0,994 | 2,07E-20 |
| Mmd2      | 1,33E-24 | -0,39893 | 0,145 | 0,439 | 2,1E-20  |
| Cox7c     | 1,38E-24 | -0,2799  | 0,998 | 0,998 | 2,18E-20 |
| Cryab     | 1,48E-24 | -0,29505 | 1     | 0,998 | 2,33E-20 |
| Asrgl1    | 1,54E-24 | -0,41088 | 0,594 | 0,793 | 2,43E-20 |
| Pak7      | 1,64E-24 | -0,38906 | 0,497 | 0,781 | 2,59E-20 |
| Nkd1      | 1,86E-24 | -0,33209 | 0,413 | 0,722 | 2,93E-20 |
| Cystm1    | 1,87E-24 | -0,30476 | 0,954 | 0,977 | 2,96E-20 |
| Klf6      | 2,13E-24 | 0,759942 | 0,717 | 0,492 | 3,35E-20 |
| Mrps21    | 2,52E-24 | -0,31482 | 0,583 | 0,823 | 3,97E-20 |
| Serpib1a  | 3,45E-24 | -0,51119 | 0,895 | 0,914 | 5,44E-20 |
| Purb      | 3,86E-24 | 0,413202 | 0,949 | 0,848 | 6,09E-20 |
| Efcab14   | 4,19E-24 | -0,38861 | 0,982 | 0,983 | 6,61E-20 |
| Cox5a     | 4,66E-24 | -0,32767 | 0,736 | 0,911 | 7,35E-20 |
| Ndufa3    | 5,71E-24 | -0,27174 | 0,976 | 0,994 | 9,01E-20 |
| Slc44a1   | 6,08E-24 | 0,273643 | 1     | 0,998 | 9,58E-20 |
| Btg2      | 6,38E-24 | 1,053577 | 0,431 | 0,165 | 1,01E-19 |
| Cd63      | 7,39E-24 | 0,42811  | 0,989 | 0,869 | 1,17E-19 |
| Msmo1     | 9,37E-24 | 0,622421 | 0,927 | 0,766 | 1,48E-19 |
| Gjc2      | 1,03E-23 | -0,32875 | 0,95  | 0,992 | 1,63E-19 |
| BC005537  | 1,04E-23 | 0,426387 | 0,892 | 0,772 | 1,65E-19 |
| Timm8b    | 1,26E-23 | -0,33398 | 0,618 | 0,838 | 1,98E-19 |
| Higd1a    | 1,55E-23 | -0,33433 | 0,554 | 0,823 | 2,45E-19 |

|           |          |          |       |       |          |
|-----------|----------|----------|-------|-------|----------|
| Npc1      | 1,97E-23 | 0,309906 | 1     | 0,981 | 3,11E-19 |
| Epdr1     | 2,14E-23 | -0,32021 | 0,275 | 0,593 | 3,37E-19 |
| Lyz2      | 2,36E-23 | -0,21698 | 0,05  | 0,281 | 3,72E-19 |
| Jmjd1c    | 4,16E-23 | 0,558522 | 0,778 | 0,591 | 6,56E-19 |
| Ndufb4    | 4,73E-23 | -0,33204 | 0,855 | 0,926 | 7,46E-19 |
| Ubl5      | 5,44E-23 | -0,26495 | 0,93  | 0,975 | 8,58E-19 |
| Cdk19     | 6,75E-23 | 0,371116 | 0,93  | 0,829 | 1,06E-18 |
| Taldo1    | 8,25E-23 | -0,27427 | 1     | 0,998 | 1,3E-18  |
| Slc25a27  | 8,74E-23 | -0,50447 | 0,284 | 0,557 | 1,38E-18 |
| Bin1      | 1,09E-22 | -0,33849 | 0,994 | 1     | 1,71E-18 |
| Pon2      | 1,56E-22 | -0,3456  | 0,47  | 0,736 | 2,47E-18 |
| Ypel3     | 1,94E-22 | -0,30497 | 0,866 | 0,956 | 3,06E-18 |
| Rnf13     | 2,33E-22 | -0,21865 | 0,998 | 0,998 | 3,68E-18 |
| Mthfs1    | 2,44E-22 | -0,29101 | 0,305 | 0,614 | 3,85E-18 |
| 1700063Dl | 2,45E-22 | -0,40398 | 0,106 | 0,354 | 3,87E-18 |
| Efh1      | 2,62E-22 | -0,35669 | 0,844 | 0,922 | 4,14E-18 |
| Ctnnbip1  | 2,85E-22 | -0,36525 | 0,637 | 0,838 | 4,5E-18  |
| March1    | 3,54E-22 | -0,34052 | 0,182 | 0,458 | 5,59E-18 |
| Acyp2     | 3,8E-22  | -0,34467 | 0,488 | 0,747 | 5,99E-18 |
| Usmg5     | 3,85E-22 | -0,29158 | 0,804 | 0,92  | 6,07E-18 |
| Zeb2      | 4,31E-22 | 0,303082 | 1     | 0,998 | 6,81E-18 |
| 1810022Kl | 4,44E-22 | -0,29723 | 0,494 | 0,776 | 7E-18    |
| Ndufb9    | 4,85E-22 | -0,2642  | 0,945 | 0,979 | 7,65E-18 |
| Fam53b    | 4,97E-22 | 0,388546 | 0,914 | 0,8   | 7,84E-18 |
| Smdt1     | 5,24E-22 | -0,25536 | 0,976 | 0,987 | 8,27E-18 |
| Fnta      | 5,43E-22 | -0,34822 | 0,772 | 0,905 | 8,56E-18 |
| Gde1      | 5,81E-22 | -0,36364 | 0,89  | 0,949 | 9,17E-18 |
| Tvp23b    | 9,54E-22 | -0,28251 | 0,301 | 0,614 | 1,51E-17 |
| Hspa8     | 9,97E-22 | -0,22174 | 1     | 0,998 | 1,57E-17 |
| Srp14     | 1,19E-21 | -0,26565 | 0,963 | 0,979 | 1,87E-17 |
| Inpp5f    | 1,27E-21 | -0,33794 | 0,824 | 0,949 | 2,01E-17 |
| Gm4524    | 1,44E-21 | -0,20702 | 0,026 | 0,215 | 2,27E-17 |
| B230118Hl | 1,71E-21 | -0,30091 | 0,503 | 0,772 | 2,69E-17 |
| 2010107El | 1,75E-21 | -0,31871 | 0,783 | 0,901 | 2,76E-17 |
| Slc25a4   | 1,8E-21  | -0,24645 | 0,994 | 0,998 | 2,84E-17 |
| BC031181  | 2,38E-21 | -0,28968 | 0,877 | 0,954 | 3,76E-17 |
| Gstm1     | 2,45E-21 | -0,43273 | 0,538 | 0,776 | 3,86E-17 |
| Dusp1     | 2,7E-21  | 0,861229 | 0,45  | 0,203 | 4,26E-17 |
| Mettl7a1  | 2,95E-21 | -0,32485 | 0,549 | 0,81  | 4,65E-17 |
| Depdc7    | 4,18E-21 | -0,27836 | 0,161 | 0,432 | 6,6E-17  |
| Slu7      | 4,46E-21 | -0,39146 | 0,73  | 0,861 | 7,03E-17 |
| Vdac2     | 5E-21    | -0,28781 | 0,91  | 0,958 | 7,89E-17 |
| Nudt19    | 5,42E-21 | -0,26408 | 0,217 | 0,506 | 8,55E-17 |
| Cpox      | 8,5E-21  | -0,38892 | 0,974 | 0,973 | 1,34E-16 |
| Pde6d     | 2,35E-20 | -0,2924  | 0,633 | 0,846 | 3,71E-16 |
| Zbtb20    | 2,58E-20 | 0,351286 | 0,996 | 0,985 | 4,07E-16 |
| Ostc      | 3,72E-20 | -0,27431 | 0,365 | 0,652 | 5,87E-16 |
| 18100371l | 4,35E-20 | -0,26017 | 0,978 | 0,989 | 6,86E-16 |
| Iscu      | 4,81E-20 | -0,27311 | 0,325 | 0,618 | 7,59E-16 |
| Jam3      | 7,09E-20 | -0,26631 | 0,947 | 0,97  | 1,12E-15 |
| Ndufa7    | 7,51E-20 | -0,25244 | 0,912 | 0,966 | 1,18E-15 |
| Adk       | 9,32E-20 | -0,32691 | 0,506 | 0,764 | 1,47E-15 |

|          |          |          |       |       |          |
|----------|----------|----------|-------|-------|----------|
| Cdc3711  | 9,58E-20 | -0,21433 | 0,996 | 0,998 | 1,51E-15 |
| Adh5     | 9,96E-20 | -0,27976 | 0,769 | 0,926 | 1,57E-15 |
| Borcs5   | 1,43E-19 | -0,2505  | 0,222 | 0,496 | 2,26E-15 |
| Ptpre    | 1,99E-19 | -0,28809 | 0,209 | 0,487 | 3,14E-15 |
| Ddx3x    | 1,99E-19 | 0,419492 | 0,883 | 0,745 | 3,14E-15 |
| Pex2     | 2,16E-19 | -0,27926 | 0,545 | 0,797 | 3,41E-15 |
| Gstp1    | 2,2E-19  | 0,56569  | 0,987 | 0,981 | 3,48E-15 |
| Pin4     | 2,21E-19 | -0,29431 | 0,556 | 0,768 | 3,49E-15 |
| Ndufab1  | 2,28E-19 | -0,28679 | 0,772 | 0,909 | 3,6E-15  |
| Thsd7a   | 2,73E-19 | -0,31079 | 0,185 | 0,451 | 4,31E-15 |
| mt-Co1   | 3,56E-19 | -0,19704 | 1     | 1     | 5,61E-15 |
| Nudcd2   | 4,25E-19 | -0,25191 | 0,226 | 0,498 | 6,71E-15 |
| Cyb5a    | 4,42E-19 | -0,30594 | 0,826 | 0,928 | 6,97E-15 |
| Cycs     | 4,56E-19 | -0,29253 | 0,646 | 0,844 | 7,19E-15 |
| Il18     | 4,87E-19 | -0,28648 | 0,462 | 0,728 | 7,68E-15 |
| Idi1     | 5,03E-19 | 0,620959 | 0,802 | 0,627 | 7,94E-15 |
| Cox4i1   | 5,36E-19 | -0,19254 | 1     | 0,998 | 8,46E-15 |
| Guk1     | 5,39E-19 | -0,30619 | 0,523 | 0,766 | 8,5E-15  |
| Dnajc15  | 5,7E-19  | -0,27687 | 0,354 | 0,639 | 9E-15    |
| 1500011B | 5,78E-19 | -0,27428 | 0,261 | 0,53  | 9,12E-15 |
| Kif5b    | 6,25E-19 | 0,347913 | 0,963 | 0,873 | 9,86E-15 |
| Golga7   | 8,18E-19 | -0,26984 | 0,956 | 0,983 | 1,29E-14 |
| Nat8f1   | 8,7E-19  | -0,25517 | 0,156 | 0,403 | 1,37E-14 |
| Insig1   | 9,01E-19 | 0,522087 | 0,87  | 0,711 | 1,42E-14 |
| Plekhj1  | 9,02E-19 | -0,29419 | 0,444 | 0,717 | 1,42E-14 |
| Ndufaf2  | 1,04E-18 | -0,27787 | 0,428 | 0,679 | 1,64E-14 |
| Swi5     | 1,1E-18  | -0,25277 | 0,921 | 0,954 | 1,73E-14 |
| Fdft1    | 1,16E-18 | 0,448984 | 0,738 | 0,565 | 1,84E-14 |
| Evi2a    | 1,19E-18 | -0,26277 | 0,974 | 0,983 | 1,87E-14 |
| Cntn2    | 1,26E-18 | 0,265018 | 0,996 | 0,994 | 1,99E-14 |
| Mbp      | 1,32E-18 | 0,23148  | 1     | 0,998 | 2,09E-14 |
| Psph     | 1,54E-18 | -0,28706 | 0,385 | 0,665 | 2,43E-14 |
| Lbh      | 1,55E-18 | 0,345118 | 0,956 | 0,797 | 2,45E-14 |
| Efnb3    | 1,64E-18 | -0,21299 | 0,996 | 0,998 | 2,59E-14 |
| Ndufa8   | 1,66E-18 | -0,25531 | 0,598 | 0,835 | 2,61E-14 |
| Snx10    | 1,66E-18 | 0,382488 | 0,446 | 0,192 | 2,62E-14 |
| Hcn2     | 1,71E-18 | -0,46939 | 0,881 | 0,924 | 2,7E-14  |
| Ywhaz    | 2,1E-18  | 0,297925 | 0,983 | 0,962 | 3,32E-14 |
| 3110021N | 2,11E-18 | -0,2594  | 0,217 | 0,477 | 3,32E-14 |
| Sft2d1   | 2,21E-18 | -0,29082 | 0,706 | 0,85  | 3,48E-14 |
| Atf3     | 2,28E-18 | 0,723959 | 0,235 | 0,044 | 3,6E-14  |
| Tra2b    | 2,3E-18  | 0,386069 | 0,872 | 0,772 | 3,63E-14 |
| Tubb4a   | 2,4E-18  | -0,24264 | 1     | 0,998 | 3,79E-14 |
| Kctd4    | 2,42E-18 | -0,30491 | 0,332 | 0,612 | 3,82E-14 |
| Mpc2     | 2,51E-18 | -0,24543 | 0,853 | 0,93  | 3,97E-14 |
| Rab3a    | 2,65E-18 | -0,27743 | 0,4   | 0,667 | 4,19E-14 |
| Vta1     | 2,72E-18 | -0,29602 | 0,552 | 0,778 | 4,29E-14 |
| Mcee     | 2,97E-18 | -0,30382 | 0,477 | 0,726 | 4,69E-14 |
| Gkap1    | 3,29E-18 | -0,32619 | 0,756 | 0,895 | 5,19E-14 |
| Aatk     | 3,55E-18 | 0,248304 | 0,996 | 0,996 | 5,6E-14  |
| Khdrbs3  | 3,56E-18 | -0,24433 | 0,15  | 0,392 | 5,61E-14 |
| Tex52    | 3,8E-18  | -0,24307 | 0,141 | 0,376 | 5,99E-14 |

|           |          |          |       |       |          |
|-----------|----------|----------|-------|-------|----------|
| Ndufc1    | 3,89E-18 | -0,28332 | 0,811 | 0,914 | 6,13E-14 |
| Zfp36l2   | 4,15E-18 | 0,472967 | 0,662 | 0,479 | 6,55E-14 |
| Lamtor5   | 4,34E-18 | -0,25879 | 0,565 | 0,81  | 6,85E-14 |
| Abhd12    | 4,52E-18 | -0,32386 | 0,806 | 0,886 | 7,14E-14 |
| Mt3       | 4,63E-18 | -0,24754 | 0,084 | 0,295 | 7,31E-14 |
| Reep3     | 4,89E-18 | 0,267196 | 0,993 | 0,989 | 7,72E-14 |
| Tmsb10    | 5,06E-18 | 0,519181 | 0,71  | 0,504 | 7,98E-14 |
| Clic4     | 5,55E-18 | 0,277413 | 0,996 | 0,975 | 8,75E-14 |
| Endod1    | 5,75E-18 | 0,273322 | 0,994 | 0,977 | 9,08E-14 |
| Atp5k     | 6,61E-18 | -0,23354 | 0,967 | 0,992 | 1,04E-13 |
| Mrps33    | 7,02E-18 | -0,29149 | 0,736 | 0,888 | 1,11E-13 |
| Edil3     | 7,26E-18 | 0,224608 | 1     | 0,996 | 1,15E-13 |
| Auh       | 7,36E-18 | -0,2822  | 0,6   | 0,804 | 1,16E-13 |
| Uqcrb     | 8,24E-18 | -0,26627 | 0,772 | 0,899 | 1,3E-13  |
| Adgrl3    | 8,34E-18 | -0,24606 | 0,094 | 0,31  | 1,32E-13 |
| Stard3nl  | 8,44E-18 | -0,29448 | 0,6   | 0,821 | 1,33E-13 |
| Glod4     | 8,48E-18 | -0,29784 | 0,721 | 0,876 | 1,34E-13 |
| Rap2a     | 9,01E-18 | -0,30781 | 0,316 | 0,593 | 1,42E-13 |
| Rpl13a    | 9,22E-18 | 0,344862 | 0,96  | 0,905 | 1,46E-13 |
| Bola3     | 9,27E-18 | -0,21828 | 0,235 | 0,5   | 1,46E-13 |
| Ndufb3    | 9,31E-18 | -0,27131 | 0,782 | 0,899 | 1,47E-13 |
| Sys1      | 1,02E-17 | -0,35054 | 0,905 | 0,935 | 1,62E-13 |
| Fam96a    | 1,18E-17 | -0,24402 | 0,284 | 0,551 | 1,86E-13 |
| Fam177a   | 1,29E-17 | -0,23328 | 0,119 | 0,34  | 2,04E-13 |
| Psen2     | 1,49E-17 | -0,29554 | 0,294 | 0,555 | 2,35E-13 |
| Pdpf      | 1,72E-17 | -0,29978 | 0,53  | 0,751 | 2,71E-13 |
| Papss1    | 1,76E-17 | -0,25658 | 0,914 | 0,975 | 2,78E-13 |
| Uqcrq     | 1,9E-17  | -0,22388 | 0,947 | 0,981 | 2,99E-13 |
| Pin1      | 1,91E-17 | -0,25838 | 0,49  | 0,755 | 3,02E-13 |
| Uqcr11    | 2,01E-17 | -0,22315 | 0,947 | 0,975 | 3,17E-13 |
| lqsec1    | 2,04E-17 | 0,364327 | 0,936 | 0,838 | 3,22E-13 |
| Selenoh   | 2,13E-17 | -0,25504 | 0,25  | 0,504 | 3,36E-13 |
| Ubc       | 2,21E-17 | 0,443305 | 1     | 0,996 | 3,49E-13 |
| Col6a1    | 2,35E-17 | 0,39105  | 0,189 | 0,021 | 3,7E-13  |
| Ech1      | 2,54E-17 | -0,26834 | 0,743 | 0,886 | 4E-13    |
| Btf3      | 2,79E-17 | -0,20581 | 0,993 | 0,994 | 4,4E-13  |
| Trappc6a  | 3,06E-17 | -0,23903 | 0,191 | 0,435 | 4,83E-13 |
| Atp10b    | 3,07E-17 | -0,23062 | 0,13  | 0,357 | 4,84E-13 |
| Plekhh2   | 3,36E-17 | -0,228   | 0,136 | 0,369 | 5,3E-13  |
| Cmtm5     | 3,73E-17 | -0,22037 | 1     | 0,998 | 5,89E-13 |
| Gnai1     | 3,74E-17 | -0,26282 | 0,976 | 0,981 | 5,89E-13 |
| Tspan3    | 3,9E-17  | -0,22474 | 0,95  | 0,987 | 6,15E-13 |
| Emc6      | 4,58E-17 | -0,24692 | 0,422 | 0,696 | 7,22E-13 |
| Pfdn4     | 4,62E-17 | -0,21834 | 0,24  | 0,5   | 7,29E-13 |
| Sppl2b    | 5,78E-17 | -0,25234 | 0,169 | 0,407 | 9,12E-13 |
| Gabarapl2 | 6,72E-17 | -0,22302 | 0,967 | 0,977 | 1,06E-12 |
| Map4k4    | 8,52E-17 | 0,266877 | 0,989 | 0,987 | 1,34E-12 |
| Hopx      | 8,9E-17  | -0,79193 | 0,576 | 0,724 | 1,4E-12  |
| Tsc22d4   | 1,02E-16 | -0,23946 | 0,998 | 0,998 | 1,61E-12 |
| Hmgn2     | 1,03E-16 | -0,28895 | 0,8   | 0,895 | 1,63E-12 |
| Sik3      | 1,33E-16 | 0,303498 | 0,954 | 0,861 | 2,09E-12 |
| Rab4a     | 1,36E-16 | -0,29189 | 0,352 | 0,599 | 2,14E-12 |

|           |          |          |       |       |          |
|-----------|----------|----------|-------|-------|----------|
| Kif21a    | 1,42E-16 | -0,25683 | 0,934 | 0,977 | 2,24E-12 |
| Ndufb8    | 1,49E-16 | -0,23354 | 0,89  | 0,945 | 2,35E-12 |
| Gadd45g   | 1,51E-16 | 0,71445  | 0,233 | 0,051 | 2,39E-12 |
| Timm8a1   | 1,63E-16 | -0,23175 | 0,25  | 0,504 | 2,58E-12 |
| Atp5c1    | 1,89E-16 | -0,23136 | 0,923 | 0,958 | 2,97E-12 |
| Cyp2j12   | 2,28E-16 | -0,32508 | 0,279 | 0,515 | 3,6E-12  |
| Wfdc18    | 2,34E-16 | -0,32574 | 0,106 | 0,31  | 3,7E-12  |
| Fbxo2     | 2,62E-16 | -0,36861 | 0,343 | 0,576 | 4,13E-12 |
| Klf13     | 2,7E-16  | 0,319109 | 0,993 | 0,992 | 4,26E-12 |
| Atp5e     | 2,7E-16  | -0,2099  | 0,969 | 0,987 | 4,26E-12 |
| Rtn3      | 2,76E-16 | -0,18654 | 0,998 | 0,996 | 4,36E-12 |
| Mrpl34    | 2,87E-16 | -0,2419  | 0,415 | 0,673 | 4,53E-12 |
| Ddt       | 2,88E-16 | -0,23904 | 0,409 | 0,681 | 4,54E-12 |
| Rpa3      | 3,02E-16 | -0,22465 | 0,198 | 0,439 | 4,76E-12 |
| Eloc      | 3,04E-16 | -0,23574 | 0,78  | 0,907 | 4,79E-12 |
| Fam174a   | 3,05E-16 | -0,25932 | 0,611 | 0,825 | 4,81E-12 |
| Gipc1     | 3,38E-16 | -0,30031 | 0,367 | 0,61  | 5,33E-12 |
| Grb14     | 3,4E-16  | -0,39577 | 0,945 | 0,954 | 5,37E-12 |
| Chchd1    | 3,51E-16 | -0,23747 | 0,583 | 0,819 | 5,54E-12 |
| Gjb1      | 3,59E-16 | -0,25872 | 0,983 | 0,97  | 5,67E-12 |
| Glrb      | 3,6E-16  | -0,28644 | 0,534 | 0,753 | 5,67E-12 |
| Rsrp1     | 4,08E-16 | -0,18644 | 0,998 | 0,998 | 6,44E-12 |
| Coq2      | 4,08E-16 | -0,2153  | 0,266 | 0,534 | 6,44E-12 |
| Atp5j2    | 4,11E-16 | -0,20162 | 0,965 | 0,983 | 6,48E-12 |
| A230001M  | 4,15E-16 | -0,26685 | 0,273 | 0,523 | 6,54E-12 |
| Ldhb      | 4,22E-16 | -0,53088 | 0,563 | 0,715 | 6,65E-12 |
| Tuba1a    | 4,22E-16 | -0,3069  | 1     | 0,998 | 6,66E-12 |
| Srcin1    | 4,46E-16 | 0,310715 | 0,978 | 0,951 | 7,03E-12 |
| Col6a2    | 4,52E-16 | 0,394831 | 0,222 | 0,044 | 7,13E-12 |
| Aes       | 4,79E-16 | -0,20611 | 0,985 | 0,994 | 7,56E-12 |
| Prr5l     | 5E-16    | -0,25751 | 0,895 | 0,96  | 7,89E-12 |
| Gm42418   | 5,14E-16 | 0,245796 | 1     | 1     | 8,1E-12  |
| Pdk2      | 5,18E-16 | -0,29173 | 0,283 | 0,527 | 8,17E-12 |
| Aig1      | 5,6E-16  | -0,2195  | 0,912 | 0,958 | 8,83E-12 |
| Phldb1    | 5,99E-16 | 0,287553 | 0,994 | 0,964 | 9,44E-12 |
| Ptch1     | 6,54E-16 | -0,27385 | 0,321 | 0,576 | 1,03E-11 |
| Smim26    | 6,82E-16 | -0,24246 | 0,549 | 0,787 | 1,08E-11 |
| Bet1      | 7,28E-16 | -0,26838 | 0,587 | 0,795 | 1,15E-11 |
| Lmna      | 7,55E-16 | 0,368309 | 0,809 | 0,629 | 1,19E-11 |
| Anks1b    | 7,71E-16 | 0,293516 | 0,969 | 0,876 | 1,22E-11 |
| Hsd17b10  | 7,75E-16 | -0,2842  | 0,497 | 0,707 | 1,22E-11 |
| Nudt2     | 7,82E-16 | -0,20511 | 0,207 | 0,451 | 1,23E-11 |
| Pabpc1    | 8,04E-16 | 0,305419 | 0,91  | 0,816 | 1,27E-11 |
| Ndufa11   | 8,91E-16 | -0,25823 | 0,806 | 0,888 | 1,41E-11 |
| 2900097C: | 8,94E-16 | 0,332912 | 0,862 | 0,778 | 1,41E-11 |
| Ndufc2    | 1,01E-15 | -0,24758 | 0,881 | 0,93  | 1,59E-11 |
| Cox8a     | 1,07E-15 | -0,20066 | 0,993 | 0,992 | 1,69E-11 |
| Tma7      | 1,07E-15 | -0,26282 | 0,785 | 0,89  | 1,69E-11 |
| Masp1     | 1,12E-15 | -0,28344 | 0,158 | 0,378 | 1,76E-11 |
| Ndrp1     | 1,18E-15 | 0,210652 | 1     | 0,998 | 1,86E-11 |
| Gca       | 1,18E-15 | -0,2194  | 0,228 | 0,473 | 1,87E-11 |
| Lars2     | 1,2E-15  | 0,343694 | 0,919 | 0,85  | 1,89E-11 |



|          |          |          |       |       |          |
|----------|----------|----------|-------|-------|----------|
| Dnajc24  | 1,23E-15 | -0,2348  | 0,484 | 0,736 | 1,94E-11 |
| Sirt2    | 1,27E-15 | -0,1846  | 1     | 0,998 | 2E-11    |
| Sar1b    | 1,28E-15 | -0,24625 | 0,571 | 0,776 | 2,02E-11 |
| Sec62    | 1,34E-15 | -0,20338 | 0,996 | 1     | 2,12E-11 |
| Chchd3   | 1,38E-15 | -0,2386  | 0,372 | 0,631 | 2,18E-11 |
| Tob2     | 1,56E-15 | 0,401404 | 0,743 | 0,591 | 2,47E-11 |
| Atp5g2   | 1,64E-15 | -0,21755 | 0,961 | 0,973 | 2,59E-11 |
| Frmd8    | 1,69E-15 | -0,26643 | 0,916 | 0,958 | 2,66E-11 |
| Dock9    | 1,73E-15 | -0,33955 | 0,699 | 0,835 | 2,73E-11 |
| Ndufs7   | 1,8E-15  | -0,20753 | 0,949 | 0,97  | 2,84E-11 |
| Lrrc4b   | 1,82E-15 | 0,306836 | 0,868 | 0,762 | 2,87E-11 |
| Snhg20   | 1,89E-15 | -0,22839 | 0,29  | 0,553 | 2,99E-11 |
| Pigp     | 1,95E-15 | -0,2774  | 0,549 | 0,755 | 3,07E-11 |
| Nop10    | 1,98E-15 | -0,22971 | 0,431 | 0,688 | 3,13E-11 |
| Pfn2     | 2,01E-15 | -0,26732 | 0,681 | 0,831 | 3,18E-11 |
| Acyp1    | 2,04E-15 | -0,22006 | 0,213 | 0,447 | 3,21E-11 |
| Sparcl1  | 2,1E-15  | -0,18955 | 0,024 | 0,167 | 3,32E-11 |
| Rassf4   | 2,17E-15 | -0,24727 | 0,123 | 0,329 | 3,43E-11 |
| Fam162a  | 2,24E-15 | -0,22809 | 0,242 | 0,487 | 3,53E-11 |
| Apopt1   | 2,26E-15 | -0,24898 | 0,378 | 0,622 | 3,57E-11 |
| Cdh10    | 2,27E-15 | -0,24076 | 0,182 | 0,405 | 3,58E-11 |
| Csmd3    | 2,34E-15 | -0,2337  | 0,325 | 0,586 | 3,7E-11  |
| Cacybp   | 2,37E-15 | -0,26225 | 0,606 | 0,785 | 3,75E-11 |
| Stard3   | 2,38E-15 | -0,26941 | 0,473 | 0,709 | 3,75E-11 |
| Tmprss5  | 2,44E-15 | -0,27787 | 0,204 | 0,43  | 3,86E-11 |
| Dad1     | 2,56E-15 | -0,22468 | 0,947 | 0,97  | 4,03E-11 |
| Mrps28   | 2,57E-15 | -0,21529 | 0,218 | 0,458 | 4,05E-11 |
| Prrt1    | 2,63E-15 | -0,23616 | 0,499 | 0,753 | 4,15E-11 |
| Sp3os    | 2,64E-15 | -0,19087 | 0,149 | 0,376 | 4,17E-11 |
| Bloc1s2  | 2,66E-15 | -0,21405 | 0,31  | 0,568 | 4,2E-11  |
| Tmem14a  | 2,73E-15 | -0,24779 | 0,358 | 0,601 | 4,31E-11 |
| Rasal2   | 3,06E-15 | -0,24963 | 0,376 | 0,629 | 4,83E-11 |
| Ciapin1  | 3,1E-15  | -0,20539 | 0,25  | 0,502 | 4,89E-11 |
| Ncam2    | 3,38E-15 | -0,26224 | 0,585 | 0,806 | 5,33E-11 |
| Robo1    | 3,43E-15 | -0,22647 | 0,194 | 0,428 | 5,41E-11 |
| Ernm     | 3,72E-15 | -0,17083 | 1     | 0,998 | 5,86E-11 |
| Rab31    | 3,83E-15 | 0,291934 | 0,965 | 0,895 | 6,04E-11 |
| Cox7a2   | 4,15E-15 | -0,20732 | 0,985 | 0,979 | 6,55E-11 |
| Ptgr2    | 4,17E-15 | -0,24468 | 0,308 | 0,553 | 6,57E-11 |
| Zfp36    | 4,59E-15 | 0,828489 | 0,4   | 0,211 | 7,24E-11 |
| Npas3    | 4,82E-15 | -0,22763 | 0,13  | 0,335 | 7,61E-11 |
| Arhgef12 | 5,02E-15 | 0,341656 | 0,848 | 0,671 | 7,92E-11 |
| Sdf2     | 5,07E-15 | -0,21062 | 0,433 | 0,705 | 8E-11    |
| Igsf11   | 5,1E-15  | -0,27877 | 0,604 | 0,783 | 8,05E-11 |
| Ssu72    | 5,28E-15 | -0,23681 | 0,519 | 0,768 | 8,32E-11 |
| Mrpl43   | 5,36E-15 | -0,22097 | 0,536 | 0,781 | 8,46E-11 |
| Amn1     | 5,4E-15  | -0,21915 | 0,281 | 0,546 | 8,53E-11 |
| Atp6v1g1 | 5,43E-15 | -0,22677 | 0,956 | 0,981 | 8,56E-11 |
| Rtl8a    | 5,63E-15 | -0,24058 | 0,872 | 0,937 | 8,88E-11 |
| Sf3b5    | 5,99E-15 | -0,22603 | 0,541 | 0,751 | 9,45E-11 |
| Cox6a1   | 7,47E-15 | -0,19993 | 0,958 | 0,985 | 1,18E-10 |
| Usp50    | 7,63E-15 | -0,19674 | 0,16  | 0,376 | 1,2E-10  |

|         |          |          |       |       |          |
|---------|----------|----------|-------|-------|----------|
| Sbno2   | 7,92E-15 | 0,620043 | 0,466 | 0,268 | 1,25E-10 |
| Selenok | 8,16E-15 | -0,18077 | 1     | 1     | 1,29E-10 |
| Emc4    | 8,47E-15 | -0,23545 | 0,488 | 0,728 | 1,34E-10 |
| Iah1    | 1,02E-14 | -0,22417 | 0,194 | 0,418 | 1,61E-10 |
| Ss18l2  | 1,04E-14 | -0,36765 | 0,699 | 0,831 | 1,64E-10 |
| Sgk3    | 1,13E-14 | -0,25399 | 0,279 | 0,508 | 1,79E-10 |
| Pum2    | 1,14E-14 | 0,31175  | 0,824 | 0,715 | 1,79E-10 |
| C1d     | 1,21E-14 | -0,21496 | 0,426 | 0,681 | 1,91E-10 |
| Cbr1    | 1,22E-14 | -0,19548 | 0,167 | 0,386 | 1,92E-10 |
| Klf4    | 1,22E-14 | 0,779882 | 0,262 | 0,084 | 1,92E-10 |
| Cltc    | 1,3E-14  | 0,249886 | 0,969 | 0,907 | 2,05E-10 |
| Acot13  | 1,3E-14  | -0,23813 | 0,356 | 0,603 | 2,06E-10 |
| Gramd3  | 1,32E-14 | -0,22115 | 0,209 | 0,439 | 2,08E-10 |
| Hccs    | 1,32E-14 | -0,23065 | 0,361 | 0,624 | 2,09E-10 |
| Pxmp2   | 1,34E-14 | -0,16503 | 0,061 | 0,228 | 2,11E-10 |
| Atp6v1f | 1,5E-14  | -0,21903 | 0,921 | 0,956 | 2,37E-10 |
| Cox7b   | 1,51E-14 | -0,26928 | 0,741 | 0,859 | 2,38E-10 |
| Pno1    | 1,52E-14 | -0,22398 | 0,218 | 0,443 | 2,4E-10  |
| Ap2a1   | 1,55E-14 | -0,30868 | 0,939 | 0,951 | 2,44E-10 |
| Prr13   | 1,57E-14 | -0,20883 | 0,295 | 0,549 | 2,48E-10 |
| Cpeb2   | 1,78E-14 | 0,2829   | 0,866 | 0,764 | 2,8E-10  |
| Fhdc1   | 1,91E-14 | -0,18579 | 0,066 | 0,236 | 3,02E-10 |
| Gtf2b   | 1,96E-14 | -0,20627 | 0,371 | 0,629 | 3,1E-10  |
| Cd82    | 2E-14    | 0,255976 | 0,991 | 0,954 | 3,15E-10 |
| Gins4   | 2,07E-14 | -0,2306  | 0,437 | 0,675 | 3,26E-10 |
| Ndufv2  | 2,09E-14 | -0,22489 | 0,745 | 0,88  | 3,29E-10 |
| Coro1c  | 2,2E-14  | 0,350002 | 0,767 | 0,629 | 3,47E-10 |
| Cox17   | 2,21E-14 | -0,24255 | 0,91  | 0,964 | 3,49E-10 |
| Mdh1    | 2,24E-14 | -0,23775 | 0,721 | 0,859 | 3,53E-10 |
| Slc35a2 | 2,24E-14 | -0,25358 | 0,516 | 0,734 | 3,54E-10 |
| Ndufa5  | 2,5E-14  | -0,22177 | 0,864 | 0,935 | 3,94E-10 |
| Txndc12 | 2,51E-14 | -0,23364 | 0,336 | 0,57  | 3,96E-10 |
| Lrrc58  | 2,53E-14 | 0,277196 | 0,936 | 0,882 | 3,98E-10 |
| Atp1a1  | 2,53E-14 | 0,239553 | 0,998 | 0,987 | 3,99E-10 |
| Slirp   | 2,53E-14 | -0,25459 | 0,554 | 0,753 | 3,99E-10 |
| P2rx4   | 2,7E-14  | -0,21943 | 0,277 | 0,536 | 4,26E-10 |
| Ube2e3  | 2,99E-14 | -0,25852 | 0,721 | 0,829 | 4,72E-10 |
| Brk1    | 3,01E-14 | -0,20295 | 0,868 | 0,947 | 4,74E-10 |
| Lsm5    | 3,14E-14 | -0,20954 | 0,484 | 0,724 | 4,96E-10 |
| Selenop | 3,73E-14 | -0,40765 | 0,884 | 0,909 | 5,89E-10 |
| Lamp1   | 3,75E-14 | -0,15648 | 1     | 0,998 | 5,91E-10 |
| Psemb5  | 3,77E-14 | -0,23164 | 0,765 | 0,89  | 5,95E-10 |
| Mtss1   | 3,9E-14  | 0,329616 | 0,839 | 0,728 | 6,16E-10 |
| Tmem14c | 4,12E-14 | -0,22229 | 0,56  | 0,785 | 6,49E-10 |
| Fn3k    | 4,12E-14 | -0,23943 | 0,332 | 0,565 | 6,5E-10  |
| Tmem165 | 4,17E-14 | -0,20812 | 0,406 | 0,656 | 6,58E-10 |
| Begain  | 4,17E-14 | -0,15371 | 0,026 | 0,16  | 6,58E-10 |
| Ostf1   | 4,34E-14 | -0,20184 | 0,24  | 0,473 | 6,85E-10 |
| Hagh    | 4,6E-14  | -0,22953 | 0,532 | 0,753 | 7,26E-10 |
| Arl6ip5 | 4,99E-14 | -0,25267 | 0,637 | 0,823 | 7,88E-10 |
| Npb     | 5,08E-14 | -0,3166  | 0,022 | 0,152 | 8,02E-10 |
| Rexo2   | 5,16E-14 | -0,25053 | 0,813 | 0,895 | 8,14E-10 |

|           |          |          |       |       |          |
|-----------|----------|----------|-------|-------|----------|
| Btg1      | 5,28E-14 | 0,496837 | 0,492 | 0,304 | 8,32E-10 |
| Enho      | 5,49E-14 | -0,21873 | 0,2   | 0,418 | 8,67E-10 |
| Churc1    | 5,58E-14 | -0,25152 | 0,613 | 0,806 | 8,8E-10  |
| Serpina3n | 5,66E-14 | 0,085592 | 0,802 | 0,496 | 8,93E-10 |
| Xrcc3     | 6,06E-14 | -0,2236  | 0,266 | 0,506 | 9,56E-10 |
| Kmt5a     | 6,15E-14 | -0,26201 | 0,785 | 0,907 | 9,7E-10  |
| Trim16    | 6,21E-14 | -0,15883 | 0,028 | 0,162 | 9,79E-10 |
| Pop5      | 6,34E-14 | -0,21641 | 0,418 | 0,658 | 1E-09    |
| Pyurf     | 6,35E-14 | -0,17958 | 0,139 | 0,342 | 1E-09    |
| Ndufs5    | 6,6E-14  | -0,21436 | 0,967 | 0,979 | 1,04E-09 |
| Cln3      | 6,8E-14  | 0,334623 | 0,782 | 0,66  | 1,07E-09 |
| Abca1     | 6,88E-14 | -0,28527 | 0,209 | 0,426 | 1,09E-09 |
| Acy3      | 6,89E-14 | -0,27548 | 0,112 | 0,293 | 1,09E-09 |
| Tmem230   | 6,98E-14 | -0,19951 | 0,286 | 0,523 | 1,1E-09  |
| 1110032A  | 7,04E-14 | -0,2116  | 0,283 | 0,525 | 1,11E-09 |
| Enah      | 7,26E-14 | -0,21546 | 0,171 | 0,384 | 1,15E-09 |
| Tmcc3     | 7,3E-14  | 0,27648  | 0,998 | 0,989 | 1,15E-09 |
| Vbp1      | 7,57E-14 | -0,22414 | 0,815 | 0,911 | 1,19E-09 |
| Rasal1    | 8,15E-14 | -0,21545 | 0,103 | 0,291 | 1,28E-09 |
| Myl12b    | 8,52E-14 | -0,26396 | 0,501 | 0,719 | 1,34E-09 |
| Anapc11   | 8,61E-14 | -0,24111 | 0,89  | 0,93  | 1,36E-09 |
| Aldoa     | 8,86E-14 | -0,19835 | 0,994 | 0,998 | 1,4E-09  |
| Cyp51     | 9,03E-14 | 0,451816 | 0,776 | 0,622 | 1,42E-09 |
| Slc48a1   | 9,86E-14 | -0,1692  | 0,998 | 1     | 1,55E-09 |
| Bphl      | 9,92E-14 | -0,17128 | 0,121 | 0,312 | 1,57E-09 |
| Dhrs1     | 1E-13    | -0,21241 | 0,472 | 0,717 | 1,58E-09 |
| Slc24a2   | 1,02E-13 | 0,242975 | 1     | 0,989 | 1,61E-09 |
| Dst       | 1,07E-13 | 0,274081 | 0,998 | 0,992 | 1,68E-09 |
| Slc1a2    | 1,09E-13 | -0,17791 | 0,028 | 0,16  | 1,73E-09 |
| Ndufb6    | 1,1E-13  | -0,22261 | 0,523 | 0,753 | 1,74E-09 |
| Sec11c    | 1,14E-13 | -0,17549 | 1     | 0,998 | 1,79E-09 |
| Ddc       | 1,15E-13 | -0,32604 | 0,286 | 0,511 | 1,81E-09 |
| Psmc8     | 1,16E-13 | -0,21248 | 0,585 | 0,806 | 1,83E-09 |
| Tspan9    | 1,18E-13 | -0,28724 | 0,165 | 0,365 | 1,86E-09 |
| Emc7      | 1,23E-13 | -0,2056  | 0,919 | 0,973 | 1,95E-09 |
| 1500011K  | 1,33E-13 | -0,22906 | 0,389 | 0,622 | 2,1E-09  |
| Spp1      | 1,4E-13  | -0,10606 | 0,002 | 0,101 | 2,21E-09 |
| Fbxo36    | 1,44E-13 | -0,19184 | 0,182 | 0,392 | 2,28E-09 |
| Mrpl57    | 1,45E-13 | -0,2159  | 0,305 | 0,555 | 2,28E-09 |
| Arnt2     | 1,45E-13 | 0,310812 | 0,873 | 0,778 | 2,29E-09 |
| Xist      | 1,58E-13 | 0,384946 | 0,714 | 0,428 | 2,49E-09 |
| Atp5g1    | 1,73E-13 | -0,19825 | 0,938 | 0,96  | 2,73E-09 |
| Csrp1     | 1,76E-13 | -0,21294 | 1     | 0,998 | 2,78E-09 |
| Polr3h    | 1,79E-13 | -0,20595 | 0,229 | 0,451 | 2,83E-09 |
| Josd2     | 1,83E-13 | -0,2017  | 0,996 | 0,996 | 2,89E-09 |
| Ppp1r16b  | 1,92E-13 | 0,271649 | 0,994 | 0,968 | 3,02E-09 |
| Klf7      | 1,95E-13 | 0,320954 | 0,914 | 0,827 | 3,07E-09 |
| Fgfr2     | 2,03E-13 | -0,21688 | 0,958 | 0,983 | 3,2E-09  |
| Taf13     | 2,08E-13 | -0,23785 | 0,457 | 0,669 | 3,29E-09 |
| Tmem81    | 2,14E-13 | -0,20973 | 0,145 | 0,333 | 3,37E-09 |
| C230037L1 | 2,25E-13 | -0,19396 | 0,171 | 0,376 | 3,56E-09 |
| Tmem141   | 2,28E-13 | -0,22207 | 0,215 | 0,432 | 3,6E-09  |

|           |          |          |       |       |          |
|-----------|----------|----------|-------|-------|----------|
| Aldh1a1   | 2,33E-13 | -0,15971 | 0,061 | 0,219 | 3,68E-09 |
| Cltb      | 2,34E-13 | -0,24745 | 0,802 | 0,901 | 3,69E-09 |
| Chmp2b    | 2,46E-13 | -0,32158 | 0,494 | 0,698 | 3,89E-09 |
| Map1lc3b  | 2,5E-13  | -0,18403 | 0,963 | 0,979 | 3,94E-09 |
| Grm7      | 2,5E-13  | -0,19586 | 0,039 | 0,177 | 3,95E-09 |
| Ndufa6    | 2,62E-13 | -0,23555 | 0,807 | 0,909 | 4,13E-09 |
| Slc6a9    | 2,62E-13 | -0,23743 | 0,842 | 0,93  | 4,13E-09 |
| Gss       | 2,73E-13 | -0,25736 | 0,347 | 0,572 | 4,31E-09 |
| S100a10   | 2,77E-13 | 0,251875 | 0,251 | 0,076 | 4,38E-09 |
| Gpr85     | 2,86E-13 | -0,16391 | 0,095 | 0,272 | 4,52E-09 |
| Mrfap1    | 2,94E-13 | -0,16973 | 0,993 | 0,998 | 4,64E-09 |
| Anxa5     | 3,19E-13 | 0,117996 | 0,842 | 0,633 | 5,03E-09 |
| 0610009B: | 3,23E-13 | -0,18446 | 0,303 | 0,561 | 5,09E-09 |
| Rnf7      | 3,28E-13 | -0,21452 | 0,987 | 0,994 | 5,17E-09 |
| Prdx6     | 3,29E-13 | -0,22227 | 0,622 | 0,8   | 5,19E-09 |
| Mrps18c   | 3,33E-13 | -0,21236 | 0,393 | 0,622 | 5,25E-09 |
| Crim1     | 3,35E-13 | -0,19838 | 0,233 | 0,468 | 5,28E-09 |
| Prdx3     | 3,38E-13 | -0,18863 | 0,417 | 0,667 | 5,33E-09 |
| Myrf      | 3,4E-13  | 0,214171 | 0,991 | 0,987 | 5,37E-09 |
| Gltp      | 3,43E-13 | -0,24613 | 0,996 | 0,996 | 5,41E-09 |
| Ctnna3    | 3,5E-13  | -0,20158 | 0,283 | 0,506 | 5,52E-09 |
| Tppp3     | 3,72E-13 | -0,35698 | 0,934 | 0,951 | 5,88E-09 |
| Ndufa1    | 3,99E-13 | -0,23287 | 0,567 | 0,77  | 6,29E-09 |
| Dip2a     | 4,13E-13 | 0,286333 | 0,98  | 0,937 | 6,52E-09 |
| 2300009A: | 4,19E-13 | -0,16617 | 0,163 | 0,373 | 6,61E-09 |
| Defb42    | 4,29E-13 | -0,16953 | 0,066 | 0,224 | 6,77E-09 |
| mt-Cytb   | 4,36E-13 | -0,17741 | 1     | 0,998 | 6,88E-09 |
| Tmem60    | 4,4E-13  | -0,18089 | 0,418 | 0,677 | 6,94E-09 |
| Kcnab1    | 4,44E-13 | 0,258824 | 0,242 | 0,076 | 7E-09    |
| Sh3gl3    | 4,6E-13  | -0,23719 | 0,343 | 0,586 | 7,26E-09 |
| Yipf4     | 4,61E-13 | -0,22963 | 0,626 | 0,8   | 7,27E-09 |
| Agap1     | 4,71E-13 | 0,243414 | 0,983 | 0,977 | 7,43E-09 |
| Atp1a2    | 4,88E-13 | -0,1736  | 0,046 | 0,19  | 7,69E-09 |
| Pdrg1     | 5E-13    | -0,19824 | 0,301 | 0,53  | 7,89E-09 |
| Cttnb1    | 5,12E-13 | 0,282429 | 0,886 | 0,768 | 8,07E-09 |
| Snca      | 5,19E-13 | -0,20965 | 0,086 | 0,255 | 8,18E-09 |
| Pla2g12a  | 5,25E-13 | -0,18628 | 0,275 | 0,511 | 8,28E-09 |
| Isca2     | 5,4E-13  | -0,20369 | 0,262 | 0,481 | 8,51E-09 |
| Echs1     | 5,45E-13 | -0,21621 | 0,767 | 0,89  | 8,6E-09  |
| Cox6b1    | 5,57E-13 | -0,19842 | 0,974 | 0,983 | 8,78E-09 |
| C1galt1c1 | 5,61E-13 | -0,16779 | 0,237 | 0,466 | 8,84E-09 |
| Ctsb      | 5,71E-13 | 0,259297 | 0,998 | 0,992 | 9,01E-09 |
| Padi2     | 5,94E-13 | 0,27117  | 0,93  | 0,808 | 9,38E-09 |
| Slc35b1   | 5,99E-13 | -0,23237 | 0,466 | 0,692 | 9,44E-09 |
| Sybu      | 6,04E-13 | -0,18701 | 0,206 | 0,422 | 9,53E-09 |
| Irf1      | 6,18E-13 | 0,460195 | 0,2   | 0,051 | 9,75E-09 |
| Pomp      | 6,22E-13 | -0,18868 | 0,87  | 0,949 | 9,81E-09 |
| Dynll2    | 6,59E-13 | 0,336224 | 0,861 | 0,755 | 1,04E-08 |
| Fbln2     | 6,87E-13 | 0,224455 | 0,191 | 0,044 | 1,08E-08 |
| Edf1      | 6,98E-13 | -0,20771 | 0,833 | 0,922 | 1,1E-08  |
| Car14     | 7,06E-13 | -0,24119 | 0,883 | 0,941 | 1,11E-08 |
| Pgk1      | 7,25E-13 | -0,23116 | 0,73  | 0,863 | 1,14E-08 |

|          |          |          |       |       |          |
|----------|----------|----------|-------|-------|----------|
| Psmb2    | 7,28E-13 | -0,2361  | 0,817 | 0,907 | 1,15E-08 |
| Hapln2   | 7,43E-13 | -0,25203 | 0,95  | 0,964 | 1,17E-08 |
| Ddx3y    | 7,51E-13 | -0,26937 | 0,229 | 0,451 | 1,19E-08 |
| Tpst1    | 7,66E-13 | -0,21828 | 0,539 | 0,764 | 1,21E-08 |
| Mrpl18   | 7,77E-13 | -0,193   | 0,479 | 0,709 | 1,23E-08 |
| Mrpl55   | 8,03E-13 | -0,19235 | 0,314 | 0,544 | 1,27E-08 |
| Arl4d    | 8,23E-13 | -0,18575 | 0,152 | 0,346 | 1,3E-08  |
| Diablo   | 8,34E-13 | -0,20805 | 0,543 | 0,745 | 1,32E-08 |
| Stat3    | 8,74E-13 | 0,352898 | 0,798 | 0,648 | 1,38E-08 |
| Ndufb10  | 8,8E-13  | -0,19945 | 0,859 | 0,928 | 1,39E-08 |
| 5031439G | 8,93E-13 | 0,236878 | 0,996 | 0,96  | 1,41E-08 |
| Cisd2    | 9,49E-13 | -0,2106  | 0,56  | 0,768 | 1,5E-08  |
| Cebpzos  | 9,56E-13 | -0,19909 | 0,202 | 0,405 | 1,51E-08 |
| Polr2c   | 9,6E-13  | -0,17917 | 0,461 | 0,711 | 1,51E-08 |
| Gyg      | 9,65E-13 | -0,22792 | 0,33  | 0,546 | 1,52E-08 |
| 2700046A | 9,69E-13 | -0,23119 | 0,101 | 0,268 | 1,53E-08 |
| Asah2    | 9,7E-13  | -0,1962  | 0,114 | 0,289 | 1,53E-08 |
| Sec61g   | 9,82E-13 | -0,20256 | 0,868 | 0,92  | 1,55E-08 |
| Rab2a    | 1,02E-12 | -0,21621 | 0,956 | 0,973 | 1,62E-08 |
| Uqcrc2   | 1,04E-12 | -0,21284 | 0,807 | 0,895 | 1,64E-08 |
| Fasn     | 1,04E-12 | 0,291521 | 0,921 | 0,821 | 1,65E-08 |
| Dcps     | 1,05E-12 | -0,20779 | 0,461 | 0,688 | 1,66E-08 |
| Abhd3    | 1,15E-12 | -0,19169 | 0,185 | 0,388 | 1,82E-08 |
| Vamp7    | 1,15E-12 | -0,24572 | 0,376 | 0,599 | 1,82E-08 |
| Cenpx    | 1,21E-12 | -0,1891  | 0,338 | 0,576 | 1,91E-08 |
| Fbxo44   | 1,21E-12 | -0,2084  | 0,262 | 0,485 | 1,91E-08 |
| Mrpl36   | 1,28E-12 | -0,20388 | 0,286 | 0,519 | 2,03E-08 |
| Ormdl2   | 1,29E-12 | -0,2002  | 0,308 | 0,536 | 2,04E-08 |
| Hbb-bs   | 1,32E-12 | -2,84885 | 0     | 0,089 | 2,08E-08 |
| 4933431E | 1,36E-12 | -0,25602 | 0,547 | 0,732 | 2,14E-08 |
| Ube2n    | 1,37E-12 | -0,21412 | 0,752 | 0,871 | 2,16E-08 |
| Abca6    | 1,37E-12 | -0,13439 | 0,055 | 0,203 | 2,16E-08 |
| Gm42500  | 1,37E-12 | -0,18382 | 0,105 | 0,276 | 2,17E-08 |
| Sept9    | 1,45E-12 | 0,29062  | 0,383 | 0,196 | 2,29E-08 |
| Dctn3    | 1,49E-12 | -0,209   | 0,813 | 0,907 | 2,35E-08 |
| Son      | 1,49E-12 | 0,21981  | 0,998 | 0,994 | 2,35E-08 |
| Hdhd2    | 1,6E-12  | -0,22013 | 0,528 | 0,738 | 2,52E-08 |
| Taz      | 1,72E-12 | -0,19783 | 0,372 | 0,616 | 2,71E-08 |
| Tecr     | 1,76E-12 | -0,17778 | 0,998 | 0,996 | 2,77E-08 |
| Scamp3   | 1,79E-12 | -0,17945 | 0,411 | 0,652 | 2,83E-08 |
| Rtl8b    | 1,81E-12 | -0,24703 | 0,664 | 0,821 | 2,85E-08 |
| Hmbs     | 1,83E-12 | -0,16195 | 0,156 | 0,357 | 2,88E-08 |
| Pex7     | 1,85E-12 | -0,2019  | 0,275 | 0,494 | 2,92E-08 |
| Fgf22    | 1,86E-12 | -0,15309 | 0,062 | 0,213 | 2,94E-08 |
| Rnf113a2 | 2,18E-12 | -0,16651 | 0,2   | 0,405 | 3,44E-08 |
| Pnkd     | 2,2E-12  | -0,22723 | 0,783 | 0,899 | 3,46E-08 |
| Plip     | 2,2E-12  | -0,16491 | 1     | 0,998 | 3,47E-08 |
| Lsm7     | 2,3E-12  | -0,20151 | 0,488 | 0,728 | 3,63E-08 |
| P4hb     | 2,31E-12 | 0,265641 | 0,89  | 0,797 | 3,64E-08 |
| Sertad1  | 2,34E-12 | 0,331582 | 0,284 | 0,116 | 3,68E-08 |
| Rraga    | 2,43E-12 | -0,23756 | 0,539 | 0,713 | 3,84E-08 |
| Higd2a   | 2,49E-12 | -0,22827 | 0,732 | 0,854 | 3,94E-08 |

|          |          |          |       |       |          |
|----------|----------|----------|-------|-------|----------|
| Cast     | 2,5E-12  | 0,22341  | 0,229 | 0,072 | 3,94E-08 |
| Nsmce3   | 2,53E-12 | -0,19184 | 0,455 | 0,7   | 3,99E-08 |
| Stmn4    | 2,54E-12 | -0,15033 | 1     | 0,998 | 4,01E-08 |
| Hdac5    | 2,64E-12 | 0,289892 | 0,783 | 0,656 | 4,16E-08 |
| Ccnl1    | 2,65E-12 | 0,395225 | 0,699 | 0,591 | 4,18E-08 |
| Hmox2    | 2,82E-12 | -0,22769 | 0,796 | 0,901 | 4,46E-08 |
| Rab18    | 2,85E-12 | -0,21814 | 0,793 | 0,892 | 4,49E-08 |
| Bhlhe40  | 3,09E-12 | 0,35339  | 0,327 | 0,154 | 4,88E-08 |
| Phgdh    | 3,19E-12 | -0,21292 | 0,983 | 0,985 | 5,04E-08 |
| Ddrgk1   | 3,3E-12  | -0,19318 | 0,923 | 0,956 | 5,2E-08  |
| Adam19   | 3,35E-12 | -0,21029 | 0,226 | 0,437 | 5,29E-08 |
| Zfyve21  | 3,58E-12 | -0,21551 | 0,363 | 0,58  | 5,65E-08 |
| Ddx6     | 3,66E-12 | 0,269911 | 0,919 | 0,88  | 5,77E-08 |
| Zdhhc12  | 3,71E-12 | -0,18742 | 0,172 | 0,361 | 5,85E-08 |
| Man2a2   | 3,88E-12 | 0,251624 | 0,85  | 0,755 | 6,12E-08 |
| Asf1a    | 3,93E-12 | -0,20114 | 0,29  | 0,5   | 6,21E-08 |
| Gm2115   | 3,95E-12 | -0,12514 | 0,022 | 0,137 | 6,23E-08 |
| Wbp1     | 3,96E-12 | -0,20311 | 0,272 | 0,479 | 6,24E-08 |
| Lamtor2  | 4,05E-12 | -0,19669 | 0,675 | 0,835 | 6,4E-08  |
| Rmdn1    | 4,24E-12 | -0,17807 | 0,196 | 0,399 | 6,69E-08 |
| Ndufb11  | 4,42E-12 | -0,21142 | 0,93  | 0,97  | 6,97E-08 |
| Cdk5rap3 | 4,82E-12 | -0,18824 | 0,244 | 0,454 | 7,6E-08  |
| Cerk     | 4,88E-12 | 0,332878 | 0,703 | 0,568 | 7,69E-08 |
| Hacd1    | 5,03E-12 | -0,19305 | 0,316 | 0,542 | 7,93E-08 |
| Gm15446  | 5,05E-12 | -0,11967 | 0,02  | 0,133 | 7,96E-08 |
| Atp5h    | 5,32E-12 | -0,18014 | 0,983 | 0,994 | 8,39E-08 |
| Zfp536   | 5,38E-12 | 0,277709 | 0,954 | 0,914 | 8,49E-08 |
| Fdps     | 5,48E-12 | 0,437166 | 0,875 | 0,789 | 8,65E-08 |
| Atp5j    | 5,55E-12 | -0,18412 | 0,96  | 0,979 | 8,76E-08 |
| Micall1  | 5,55E-12 | 0,251959 | 0,989 | 0,966 | 8,76E-08 |
| Tnrc6c   | 6,69E-12 | 0,305255 | 0,822 | 0,751 | 1,06E-07 |
| Rab9     | 6,75E-12 | -0,20353 | 0,461 | 0,681 | 1,06E-07 |
| Pam16    | 6,98E-12 | -0,18759 | 0,424 | 0,656 | 1,1E-07  |
| Ccdc28b  | 7,24E-12 | -0,18179 | 0,229 | 0,441 | 1,14E-07 |
| Psmd6    | 7,24E-12 | -0,18619 | 0,516 | 0,747 | 1,14E-07 |
| Lym2     | 7,64E-12 | -0,206   | 0,253 | 0,456 | 1,21E-07 |
| Arl6     | 7,68E-12 | -0,18244 | 0,196 | 0,392 | 1,21E-07 |
| Hspb11   | 7,72E-12 | -0,19264 | 0,251 | 0,462 | 1,22E-07 |
| Tm2d1    | 8,15E-12 | -0,20426 | 0,391 | 0,612 | 1,29E-07 |
| Elovl5   | 8,34E-12 | -0,25592 | 0,712 | 0,85  | 1,32E-07 |
| Fcor     | 8,34E-12 | -0,22727 | 0,341 | 0,559 | 1,32E-07 |
| Sbds     | 8,52E-12 | -0,20957 | 0,897 | 0,947 | 1,34E-07 |
| 2610524H | 8,65E-12 | -0,15573 | 0,099 | 0,266 | 1,36E-07 |
| H2-Q4    | 8,66E-12 | 0,278107 | 0,136 | 0,019 | 1,37E-07 |
| Abhd6    | 8,7E-12  | -0,18143 | 0,209 | 0,409 | 1,37E-07 |
| Arsg     | 8,81E-12 | -0,20117 | 0,908 | 0,947 | 1,39E-07 |
| Tmem59   | 9,15E-12 | -0,17783 | 0,976 | 0,989 | 1,44E-07 |
| Elob     | 9,62E-12 | -0,15696 | 0,989 | 0,987 | 1,52E-07 |
| Pcdh15   | 9,82E-12 | -0,12718 | 0,033 | 0,156 | 1,55E-07 |
| 1600012H | 1E-11    | -0,17275 | 0,202 | 0,401 | 1,58E-07 |
| Myl12a   | 1,06E-11 | -0,2025  | 0,47  | 0,688 | 1,68E-07 |
| Commd9   | 1,08E-11 | -0,1863  | 0,409 | 0,629 | 1,71E-07 |

|           |          |          |       |       |          |
|-----------|----------|----------|-------|-------|----------|
| Slc2a1    | 1,11E-11 | -0,23497 | 0,565 | 0,753 | 1,75E-07 |
| Smim13    | 1,11E-11 | -0,19186 | 0,363 | 0,599 | 1,75E-07 |
| Atp6v1e1  | 1,15E-11 | -0,18319 | 0,905 | 0,937 | 1,81E-07 |
| Runx1     | 1,18E-11 | 0,275937 | 0,15  | 0,027 | 1,86E-07 |
| Cacna1h   | 1,2E-11  | 0,207046 | 0,147 | 0,025 | 1,9E-07  |
| Tm7sf3    | 1,21E-11 | -0,19068 | 0,914 | 0,958 | 1,92E-07 |
| Cept1     | 1,22E-11 | -0,22019 | 0,459 | 0,686 | 1,93E-07 |
| Gnai2     | 1,23E-11 | 0,199757 | 1     | 0,992 | 1,94E-07 |
| Map7d2    | 1,24E-11 | -0,16653 | 0,218 | 0,428 | 1,96E-07 |
| Gadd45b   | 1,24E-11 | 0,717872 | 0,429 | 0,262 | 1,96E-07 |
| Ssbp1     | 1,25E-11 | -0,17995 | 0,305 | 0,534 | 1,97E-07 |
| Cct2      | 1,28E-11 | -0,19648 | 0,75  | 0,914 | 2,01E-07 |
| Cnp       | 1,34E-11 | -0,14799 | 1     | 1     | 2,12E-07 |
| Pts       | 1,35E-11 | -0,16023 | 0,18  | 0,371 | 2,13E-07 |
| 1110065P: | 1,37E-11 | -0,22998 | 0,484 | 0,681 | 2,16E-07 |
| Lage3     | 1,4E-11  | -0,18855 | 0,316 | 0,532 | 2,2E-07  |
| Thyn1     | 1,4E-11  | -0,15905 | 0,22  | 0,426 | 2,21E-07 |
| Tmem199   | 1,41E-11 | -0,15016 | 0,266 | 0,489 | 2,23E-07 |
| Fam69a    | 1,46E-11 | -0,1919  | 0,141 | 0,312 | 2,3E-07  |
| Polr3e    | 1,49E-11 | -0,20014 | 0,409 | 0,633 | 2,34E-07 |
| 4930402H: | 1,52E-11 | 0,218197 | 0,985 | 0,924 | 2,39E-07 |
| Lsm3      | 1,53E-11 | -0,18205 | 0,442 | 0,667 | 2,42E-07 |
| Dclk1     | 1,55E-11 | -0,18829 | 0,103 | 0,27  | 2,45E-07 |
| Csf1      | 1,58E-11 | 0,308641 | 0,864 | 0,774 | 2,49E-07 |
| Fbxw17    | 1,65E-11 | -0,18816 | 0,189 | 0,38  | 2,6E-07  |
| Pycr2     | 1,67E-11 | -0,22317 | 0,49  | 0,7   | 2,64E-07 |
| Syne2     | 1,7E-11  | 0,220211 | 0,257 | 0,095 | 2,68E-07 |
| Gjc3      | 1,71E-11 | -0,21063 | 0,982 | 0,994 | 2,69E-07 |
| Mcam      | 1,71E-11 | 0,359132 | 0,734 | 0,589 | 2,69E-07 |
| 1110004EC | 1,72E-11 | -0,14817 | 0,198 | 0,403 | 2,72E-07 |
| Bfsp2     | 1,75E-11 | -0,3308  | 0,464 | 0,643 | 2,77E-07 |
| Dclk3     | 1,8E-11  | -0,11444 | 0,028 | 0,143 | 2,83E-07 |
| Cryzl2    | 1,97E-11 | -0,15984 | 0,143 | 0,321 | 3,11E-07 |
| Trappc2l  | 1,98E-11 | -0,19705 | 0,55  | 0,755 | 3,12E-07 |
| Nfkbiz    | 1,99E-11 | 0,194303 | 0,152 | 0,03  | 3,14E-07 |
| Cldn14    | 2E-11    | -0,21359 | 0,189 | 0,384 | 3,15E-07 |
| Osbpl7    | 2,06E-11 | -0,20419 | 0,299 | 0,506 | 3,24E-07 |
| Metrn     | 2,07E-11 | -0,23278 | 0,708 | 0,821 | 3,26E-07 |
| Ppfbp2    | 2,07E-11 | 0,286242 | 0,879 | 0,829 | 3,26E-07 |
| Ppt2      | 2,1E-11  | -0,15665 | 0,147 | 0,327 | 3,32E-07 |
| Arl2      | 2,14E-11 | -0,17457 | 0,963 | 0,968 | 3,38E-07 |
| Uap1l1    | 2,16E-11 | 0,271662 | 0,429 | 0,249 | 3,4E-07  |
| Txndc17   | 2,23E-11 | -0,21765 | 0,631 | 0,781 | 3,51E-07 |
| Smim10l1  | 2,25E-11 | -0,23321 | 0,572 | 0,738 | 3,54E-07 |
| Rtn4      | 2,31E-11 | -0,14791 | 1     | 0,998 | 3,65E-07 |
| Ppa1      | 2,33E-11 | -0,15881 | 0,11  | 0,274 | 3,67E-07 |
| Selenbp1  | 2,37E-11 | -0,15029 | 0,149 | 0,333 | 3,75E-07 |
| Glul      | 2,43E-11 | -0,26826 | 1     | 0,996 | 3,84E-07 |
| Ppp5c     | 2,45E-11 | -0,17204 | 0,314 | 0,538 | 3,87E-07 |
| Nap1l3    | 2,5E-11  | -0,15734 | 0,09  | 0,247 | 3,94E-07 |
| Naa38     | 2,56E-11 | -0,19833 | 0,475 | 0,686 | 4,03E-07 |
| Pbdc1     | 2,59E-11 | -0,17184 | 0,231 | 0,443 | 4,09E-07 |

|           |          |          |       |       |          |
|-----------|----------|----------|-------|-------|----------|
| Chchd5    | 2,61E-11 | -0,16089 | 0,149 | 0,327 | 4,13E-07 |
| Psenen    | 2,66E-11 | -0,18643 | 0,912 | 0,958 | 4,19E-07 |
| Ankra2    | 2,67E-11 | -0,19054 | 0,393 | 0,624 | 4,21E-07 |
| Gm12326   | 2,7E-11  | -0,18948 | 0,123 | 0,291 | 4,27E-07 |
| Ly6g6d    | 2,74E-11 | -0,16892 | 0,141 | 0,319 | 4,32E-07 |
| Sft2d3    | 2,79E-11 | -0,16909 | 0,268 | 0,489 | 4,4E-07  |
| Per1      | 2,87E-11 | 0,489238 | 0,42  | 0,247 | 4,54E-07 |
| Fam234a   | 2,95E-11 | -0,20412 | 0,352 | 0,57  | 4,65E-07 |
| Pgam1     | 2,99E-11 | -0,18949 | 0,842 | 0,92  | 4,71E-07 |
| Lysmd1    | 2,99E-11 | -0,14266 | 0,15  | 0,331 | 4,72E-07 |
| Camk2n1   | 3,02E-11 | -0,24123 | 0,406 | 0,612 | 4,77E-07 |
| Tmem203   | 3,29E-11 | -0,15065 | 0,125 | 0,295 | 5,2E-07  |
| Mrpl41    | 3,43E-11 | -0,17888 | 0,42  | 0,656 | 5,4E-07  |
| Tmem5     | 3,45E-11 | -0,21417 | 0,604 | 0,797 | 5,44E-07 |
| Hotairm1  | 3,47E-11 | -0,21486 | 0,306 | 0,508 | 5,47E-07 |
| Smim27    | 3,5E-11  | -0,19818 | 0,229 | 0,428 | 5,53E-07 |
| Zbtb8os   | 3,57E-11 | -0,16461 | 0,301 | 0,519 | 5,63E-07 |
| Mapk10    | 3,58E-11 | -0,16209 | 0,101 | 0,259 | 5,65E-07 |
| Tomm7     | 3,58E-11 | -0,1818  | 0,824 | 0,918 | 5,65E-07 |
| Pla2g4a   | 3,72E-11 | -0,1851  | 0,257 | 0,47  | 5,87E-07 |
| Immp1l    | 3,76E-11 | -0,16736 | 0,376 | 0,603 | 5,92E-07 |
| Apbb1     | 3,81E-11 | -0,19065 | 0,936 | 0,96  | 6,01E-07 |
| Sumo1     | 3,82E-11 | -0,20319 | 0,631 | 0,808 | 6,02E-07 |
| Bpnt1     | 3,87E-11 | -0,20412 | 0,53  | 0,736 | 6,11E-07 |
| Hibadh    | 3,97E-11 | -0,21881 | 0,56  | 0,736 | 6,27E-07 |
| Sat2      | 4,01E-11 | -0,17159 | 0,209 | 0,411 | 6,33E-07 |
| Eef2      | 4,12E-11 | 0,189374 | 1     | 0,998 | 6,51E-07 |
| Gmpr2     | 4,31E-11 | -0,16877 | 0,229 | 0,43  | 6,8E-07  |
| Zfp760    | 4,35E-11 | -0,14929 | 0,105 | 0,266 | 6,85E-07 |
| Slc25a38  | 4,57E-11 | -0,16512 | 0,161 | 0,342 | 7,21E-07 |
| Mrpl20    | 4,64E-11 | -0,18773 | 0,761 | 0,88  | 7,31E-07 |
| Gdpd1     | 4,73E-11 | -0,19816 | 0,462 | 0,692 | 7,46E-07 |
| 0610040B: | 4,74E-11 | -0,13631 | 0,095 | 0,253 | 7,48E-07 |
| Uqcrh     | 4,83E-11 | -0,1783  | 0,947 | 0,977 | 7,62E-07 |
| Impa1     | 4,97E-11 | -0,16596 | 0,334 | 0,565 | 7,83E-07 |
| Anxa2     | 5,25E-11 | 0,245047 | 0,433 | 0,236 | 8,28E-07 |
| Ipp       | 5,51E-11 | -0,11714 | 0,061 | 0,198 | 8,69E-07 |
| Adssl1    | 5,73E-11 | -0,26437 | 0,906 | 0,918 | 9,04E-07 |
| Magt1     | 5,77E-11 | -0,20479 | 0,906 | 0,958 | 9,11E-07 |
| Hikeshi   | 5,79E-11 | -0,17662 | 0,339 | 0,544 | 9,13E-07 |
| Klc1      | 5,97E-11 | 0,287648 | 0,75  | 0,629 | 9,42E-07 |
| Bsg       | 6,08E-11 | -0,19163 | 0,941 | 0,968 | 9,6E-07  |
| Dctpp1    | 6,35E-11 | -0,16555 | 0,231 | 0,435 | 1E-06    |
| Dpm3      | 6,39E-11 | -0,19388 | 0,745 | 0,873 | 1,01E-06 |
| Uqcrfs1   | 6,45E-11 | -0,20169 | 0,58  | 0,772 | 1,02E-06 |
| Srm       | 6,54E-11 | -0,1873  | 0,257 | 0,468 | 1,03E-06 |
| Golim4    | 6,69E-11 | -0,23356 | 0,22  | 0,416 | 1,06E-06 |
| Itgb3bp   | 6,97E-11 | -0,16641 | 0,167 | 0,346 | 1,1E-06  |
| Mea1      | 7,04E-11 | -0,16133 | 0,288 | 0,498 | 1,11E-06 |
| Nsmce1    | 7,19E-11 | -0,16305 | 0,305 | 0,53  | 1,13E-06 |
| Dpy30     | 7,33E-11 | -0,1947  | 0,389 | 0,591 | 1,16E-06 |
| Scp2      | 7,35E-11 | -0,17358 | 0,912 | 0,951 | 1,16E-06 |



|           |          |          |       |       |          |
|-----------|----------|----------|-------|-------|----------|
| Glt8d1    | 7,4E-11  | -0,17472 | 0,239 | 0,443 | 1,17E-06 |
| Ccnh      | 7,68E-11 | -0,17599 | 0,295 | 0,504 | 1,21E-06 |
| Cmc4      | 7,73E-11 | -0,16655 | 0,207 | 0,399 | 1,22E-06 |
| Rpp30     | 7,83E-11 | -0,14242 | 0,215 | 0,414 | 1,24E-06 |
| Ddhd1     | 8,08E-11 | 0,352016 | 0,714 | 0,599 | 1,28E-06 |
| Kazn      | 8,67E-11 | 0,236378 | 0,943 | 0,892 | 1,37E-06 |
| Gtf2a2    | 8,76E-11 | -0,16185 | 0,409 | 0,643 | 1,38E-06 |
| Egr3      | 8,9E-11  | 0,318669 | 0,127 | 0,019 | 1,4E-06  |
| Napa      | 9,01E-11 | -0,18224 | 0,857 | 0,932 | 1,42E-06 |
| Chac2     | 9,13E-11 | -0,1428  | 0,105 | 0,262 | 1,44E-06 |
| Ninj2     | 9,15E-11 | -0,25113 | 0,527 | 0,711 | 1,44E-06 |
| Naa20     | 9,24E-11 | -0,16392 | 0,31  | 0,519 | 1,46E-06 |
| Nde1      | 9,52E-11 | -0,25191 | 0,512 | 0,698 | 1,5E-06  |
| Arhgdia   | 9,57E-11 | 0,23317  | 0,993 | 0,973 | 1,51E-06 |
| Polb      | 9,58E-11 | -0,19031 | 0,495 | 0,711 | 1,51E-06 |
| Sf3b6     | 9,63E-11 | -0,17798 | 0,672 | 0,829 | 1,52E-06 |
| Gstm6     | 1E-10    | -0,14456 | 0,077 | 0,222 | 1,58E-06 |
| Sdhaf1    | 1,04E-10 | -0,15943 | 0,268 | 0,475 | 1,64E-06 |
| Sdccag3   | 1,06E-10 | -0,16943 | 0,374 | 0,599 | 1,68E-06 |
| Abca8a    | 1,07E-10 | -0,22015 | 0,165 | 0,342 | 1,69E-06 |
| Dock10    | 1,08E-10 | 0,218663 | 0,987 | 0,97  | 1,71E-06 |
| Mrps14    | 1,08E-10 | -0,16449 | 0,306 | 0,53  | 1,71E-06 |
| Ppib      | 1,13E-10 | -0,16884 | 0,941 | 0,973 | 1,78E-06 |
| Marcksl1  | 1,15E-10 | 0,274387 | 0,89  | 0,711 | 1,81E-06 |
| 1110008P: | 1,15E-10 | -0,1496  | 0,2   | 0,392 | 1,82E-06 |
| Snap47    | 1,17E-10 | -0,16797 | 0,391 | 0,62  | 1,85E-06 |
| Dusp19    | 1,19E-10 | -0,15938 | 0,213 | 0,403 | 1,87E-06 |
| Tbc1d7    | 1,19E-10 | -0,1688  | 0,255 | 0,456 | 1,88E-06 |
| Ndufb5    | 1,2E-10  | -0,18945 | 0,771 | 0,865 | 1,9E-06  |
| Lancl1    | 1,2E-10  | -0,1907  | 0,409 | 0,622 | 1,9E-06  |
| Fus       | 1,21E-10 | 0,224741 | 0,987 | 0,992 | 1,91E-06 |
| Dnajc19   | 1,25E-10 | -0,20521 | 0,692 | 0,833 | 1,98E-06 |
| Ifi27     | 1,28E-10 | 0,314814 | 0,884 | 0,743 | 2,03E-06 |
| Acer2     | 1,29E-10 | -0,10685 | 0,024 | 0,129 | 2,03E-06 |
| Rpl24     | 1,36E-10 | -0,13777 | 0,991 | 0,998 | 2,14E-06 |
| Minpp1    | 1,36E-10 | -0,1618  | 0,229 | 0,428 | 2,15E-06 |
| Sptlc2    | 1,37E-10 | -0,15347 | 0,365 | 0,597 | 2,16E-06 |
| Bola1     | 1,42E-10 | -0,1962  | 0,24  | 0,428 | 2,24E-06 |
| Cyp2u1    | 1,42E-10 | -0,15768 | 0,154 | 0,327 | 2,24E-06 |
| Cers2     | 1,45E-10 | -0,14741 | 0,994 | 0,998 | 2,29E-06 |
| Cd9       | 1,46E-10 | 0,340442 | 0,952 | 0,863 | 2,31E-06 |
| Plpp3     | 1,48E-10 | 0,319382 | 0,761 | 0,627 | 2,33E-06 |
| Agbl3     | 1,49E-10 | -0,14117 | 0,11  | 0,27  | 2,35E-06 |
| Surf1     | 1,54E-10 | -0,19169 | 0,486 | 0,692 | 2,43E-06 |
| Myg1      | 1,54E-10 | -0,14649 | 0,24  | 0,443 | 2,44E-06 |
| Gm10076   | 1,55E-10 | -0,14456 | 0,097 | 0,247 | 2,44E-06 |
| Mad1l1    | 1,55E-10 | -0,15378 | 0,209 | 0,399 | 2,45E-06 |
| Irgm1     | 1,61E-10 | 0,475118 | 0,163 | 0,042 | 2,53E-06 |
| Cnn3      | 1,61E-10 | -0,21216 | 0,697 | 0,825 | 2,55E-06 |
| Tmem128   | 1,71E-10 | -0,17444 | 0,444 | 0,66  | 2,69E-06 |
| Sgf29     | 1,73E-10 | -0,13801 | 0,128 | 0,295 | 2,73E-06 |
| Zfand5    | 1,78E-10 | 0,264916 | 0,963 | 0,93  | 2,82E-06 |

|           |          |          |       |       |          |
|-----------|----------|----------|-------|-------|----------|
| Dapk2     | 1,82E-10 | -0,13278 | 0,07  | 0,207 | 2,88E-06 |
| Sptssa    | 1,84E-10 | -0,19029 | 0,813 | 0,897 | 2,9E-06  |
| Sdhaf4    | 1,84E-10 | -0,14117 | 0,127 | 0,291 | 2,9E-06  |
| Ndufs4    | 1,85E-10 | -0,18123 | 0,589 | 0,785 | 2,91E-06 |
| Coa3      | 1,85E-10 | -0,1788  | 0,666 | 0,816 | 2,92E-06 |
| Pdzd11    | 1,88E-10 | -0,17001 | 0,242 | 0,435 | 2,96E-06 |
| Gm12216   | 1,88E-10 | 0,206392 | 0,106 | 0,011 | 2,97E-06 |
| Rbbp9     | 1,92E-10 | -0,16625 | 0,292 | 0,508 | 3,03E-06 |
| Uqcc3     | 1,93E-10 | -0,16684 | 0,327 | 0,536 | 3,04E-06 |
| Amotl2    | 1,98E-10 | 0,303247 | 0,73  | 0,639 | 3,13E-06 |
| Gm14305   | 2E-10    | -0,13958 | 0,149 | 0,321 | 3,16E-06 |
| Mrpl10    | 2,01E-10 | -0,17237 | 0,279 | 0,481 | 3,18E-06 |
| Cmc1      | 2,02E-10 | -0,18759 | 0,262 | 0,449 | 3,18E-06 |
| Cript     | 2,09E-10 | -0,18782 | 0,776 | 0,871 | 3,29E-06 |
| 3830406C: | 2,16E-10 | -0,16753 | 0,275 | 0,485 | 3,4E-06  |
| Asnsd1    | 2,17E-10 | -0,14115 | 0,128 | 0,293 | 3,42E-06 |
| Fah       | 2,19E-10 | -0,21896 | 0,517 | 0,694 | 3,46E-06 |
| Cdh19     | 2,25E-10 | -0,16684 | 0,273 | 0,481 | 3,54E-06 |
| Pigyl     | 2,35E-10 | -0,18878 | 0,818 | 0,922 | 3,71E-06 |
| Fgfrl1    | 2,42E-10 | -0,25087 | 0,251 | 0,439 | 3,81E-06 |
| Ndufa13   | 2,47E-10 | -0,15558 | 0,974 | 0,981 | 3,9E-06  |
| Uchl3     | 2,53E-10 | -0,19186 | 0,402 | 0,618 | 4E-06    |
| Aif1l     | 2,62E-10 | -0,18398 | 0,328 | 0,538 | 4,14E-06 |
| Tgoln1    | 2,64E-10 | 0,233159 | 0,921 | 0,863 | 4,17E-06 |
| Trnt1     | 2,65E-10 | -0,20168 | 0,466 | 0,66  | 4,18E-06 |
| Sucla2    | 2,67E-10 | -0,17471 | 0,328 | 0,536 | 4,21E-06 |
| Aasdhppt  | 2,74E-10 | -0,16869 | 0,231 | 0,422 | 4,32E-06 |
| Mycbp     | 2,75E-10 | -0,1347  | 0,099 | 0,251 | 4,34E-06 |
| Pla2g16   | 2,77E-10 | -0,14224 | 0,998 | 0,998 | 4,37E-06 |
| Olig1     | 2,81E-10 | -0,19536 | 0,976 | 0,977 | 4,43E-06 |
| H3f3a     | 2,81E-10 | -0,15449 | 1     | 1     | 4,44E-06 |
| Tbrg1     | 2,83E-10 | -0,15691 | 0,365 | 0,593 | 4,46E-06 |
| Hoxd9     | 2,98E-10 | -0,12033 | 0,051 | 0,175 | 4,7E-06  |
| Kcnk13    | 2,98E-10 | -0,21459 | 0,651 | 0,81  | 4,7E-06  |
| Pcyt2     | 3E-10    | 0,26779  | 0,947 | 0,869 | 4,73E-06 |
| Polr2k    | 3,02E-10 | -0,17272 | 0,429 | 0,641 | 4,76E-06 |
| Pacs2     | 3,08E-10 | 0,22792  | 0,998 | 0,987 | 4,86E-06 |
| Pdia6     | 3,11E-10 | -0,22758 | 0,688 | 0,821 | 4,9E-06  |
| Myh14     | 3,14E-10 | -0,20053 | 0,422 | 0,608 | 4,96E-06 |
| Chchd4    | 3,18E-10 | -0,14379 | 0,215 | 0,411 | 5,02E-06 |
| Fryl      | 3,22E-10 | 0,2321   | 0,897 | 0,81  | 5,09E-06 |
| Kctd5     | 3,28E-10 | -0,14258 | 0,178 | 0,359 | 5,18E-06 |
| Tm2d3     | 3,33E-10 | -0,14599 | 0,295 | 0,506 | 5,25E-06 |
| Vat1      | 3,42E-10 | 0,285108 | 0,67  | 0,544 | 5,39E-06 |
| Krt10     | 3,42E-10 | -0,14252 | 0,176 | 0,359 | 5,4E-06  |
| Syt12     | 3,44E-10 | 0,300548 | 0,859 | 0,77  | 5,43E-06 |
| Tank      | 3,46E-10 | -0,15598 | 0,169 | 0,342 | 5,46E-06 |
| Mrpl58    | 3,47E-10 | -0,19354 | 0,528 | 0,715 | 5,47E-06 |
| Rnf122    | 3,48E-10 | 0,510661 | 0,505 | 0,382 | 5,49E-06 |
| Tmem126a  | 3,5E-10  | -0,15774 | 0,286 | 0,492 | 5,52E-06 |
| Pdcd5     | 3,77E-10 | -0,18087 | 0,747 | 0,846 | 5,95E-06 |
| Cndp2     | 3,88E-10 | -0,13958 | 0,246 | 0,447 | 6,12E-06 |

|           |          |          |       |       |          |
|-----------|----------|----------|-------|-------|----------|
| Smim8     | 3,95E-10 | -0,16577 | 0,226 | 0,411 | 6,23E-06 |
| Fam71a    | 4,07E-10 | 0,31451  | 0,084 | 0,002 | 6,41E-06 |
| 3110082J2 | 4,22E-10 | -0,11064 | 0,024 | 0,124 | 6,67E-06 |
| Mdp1      | 4,25E-10 | -0,17444 | 0,284 | 0,483 | 6,7E-06  |
| Galnt7    | 4,33E-10 | -0,20352 | 0,464 | 0,665 | 6,84E-06 |
| Gnas      | 4,35E-10 | -0,1546  | 0,996 | 0,994 | 6,86E-06 |
| Eef1e1    | 4,37E-10 | -0,13684 | 0,242 | 0,443 | 6,9E-06  |
| Emc2      | 4,4E-10  | -0,1871  | 0,429 | 0,629 | 6,94E-06 |
| 1700123O  | 4,44E-10 | -0,13226 | 0,191 | 0,38  | 7,01E-06 |
| Polr2d    | 4,47E-10 | -0,15631 | 0,172 | 0,342 | 7,05E-06 |
| Snhg9     | 4,48E-10 | -0,15947 | 0,196 | 0,378 | 7,07E-06 |
| Pebp1     | 4,54E-10 | -0,16243 | 0,974 | 0,987 | 7,17E-06 |
| Clic5     | 4,54E-10 | -0,15653 | 0,046 | 0,165 | 7,17E-06 |
| Eif2s3y   | 4,6E-10  | -0,19114 | 0,187 | 0,373 | 7,26E-06 |
| Grina     | 4,69E-10 | 0,248717 | 0,798 | 0,69  | 7,39E-06 |
| Lsamp     | 4,72E-10 | -0,10881 | 0,024 | 0,124 | 7,45E-06 |
| Mrps36    | 4,75E-10 | -0,17054 | 0,457 | 0,671 | 7,49E-06 |
| Cab39l    | 4,82E-10 | -0,16224 | 0,194 | 0,373 | 7,6E-06  |
| Nt5m      | 4,86E-10 | -0,15821 | 0,149 | 0,312 | 7,66E-06 |
| Pigz      | 4,93E-10 | -0,24863 | 0,723 | 0,835 | 7,78E-06 |
| Fam13c    | 4,98E-10 | 0,358905 | 0,708 | 0,559 | 7,86E-06 |
| Tomm5     | 5,15E-10 | -0,1718  | 0,389 | 0,601 | 8,12E-06 |
| Zfp938    | 5,38E-10 | -0,14121 | 0,099 | 0,245 | 8,49E-06 |
| Twistnb   | 5,62E-10 | -0,155   | 0,255 | 0,456 | 8,87E-06 |
| Pcyt1b    | 5,62E-10 | -0,15529 | 0,266 | 0,477 | 8,87E-06 |
| Zfp638    | 5,7E-10  | 0,278997 | 0,846 | 0,768 | 8,99E-06 |
| Mrpl48    | 5,79E-10 | -0,21065 | 0,76  | 0,869 | 9,13E-06 |
| Mthfs     | 5,81E-10 | -0,14641 | 0,235 | 0,43  | 9,16E-06 |
| Gm29455   | 5,85E-10 | -0,16395 | 0,099 | 0,243 | 9,23E-06 |
| Dhrs7b    | 5,91E-10 | -0,15422 | 0,277 | 0,475 | 9,32E-06 |
| Timm13    | 6E-10    | -0,16999 | 0,881 | 0,947 | 9,46E-06 |
| Pop7      | 6,06E-10 | -0,14398 | 0,193 | 0,373 | 9,56E-06 |
| Tmod2     | 6,25E-10 | -0,31694 | 0,804 | 0,816 | 9,86E-06 |
| Smpd1     | 6,27E-10 | -0,20546 | 0,563 | 0,728 | 9,9E-06  |
| Acadl     | 6,35E-10 | -0,19557 | 0,461 | 0,646 | 1E-05    |
| Mrps34    | 6,4E-10  | -0,16879 | 0,308 | 0,502 | 1,01E-05 |
| Irf2      | 6,55E-10 | -0,17403 | 0,347 | 0,553 | 1,03E-05 |
| Stk16     | 6,68E-10 | -0,16995 | 0,376 | 0,584 | 1,05E-05 |
| Polr2i    | 6,81E-10 | -0,1591  | 0,411 | 0,627 | 1,07E-05 |
| Hint3     | 7,01E-10 | -0,18138 | 0,461 | 0,669 | 1,11E-05 |
| Mettl23   | 7,03E-10 | -0,15405 | 0,33  | 0,551 | 1,11E-05 |
| Hmgcr     | 7,23E-10 | 0,453579 | 0,593 | 0,475 | 1,14E-05 |
| Cmpk1     | 7,26E-10 | -0,16427 | 0,426 | 0,639 | 1,14E-05 |
| mt-Nd4    | 7,35E-10 | -0,14509 | 1     | 0,998 | 1,16E-05 |
| Sdhb      | 7,44E-10 | -0,18731 | 0,617 | 0,785 | 1,17E-05 |
| Cetn3     | 7,59E-10 | -0,20983 | 0,705 | 0,831 | 1,2E-05  |
| Cox14     | 7,69E-10 | -0,16974 | 0,594 | 0,783 | 1,21E-05 |
| Pde4b     | 7,7E-10  | 0,226836 | 0,985 | 0,939 | 1,22E-05 |
| Ugp2      | 7,9E-10  | -0,17619 | 0,521 | 0,724 | 1,25E-05 |
| Pacsin1   | 7,91E-10 | -0,20728 | 0,31  | 0,502 | 1,25E-05 |
| 1700029JC | 7,98E-10 | -0,12746 | 0,057 | 0,179 | 1,26E-05 |
| Piga      | 8,08E-10 | -0,15539 | 0,415 | 0,616 | 1,28E-05 |

|           |          |          |       |       |          |
|-----------|----------|----------|-------|-------|----------|
| Slc25a33  | 8,15E-10 | -0,14124 | 0,095 | 0,236 | 1,29E-05 |
| Mageh1    | 8,2E-10  | -0,17567 | 0,294 | 0,492 | 1,29E-05 |
| Taok1     | 8,28E-10 | 0,235923 | 0,895 | 0,844 | 1,31E-05 |
| Gm48508   | 8,31E-10 | -0,12948 | 0,079 | 0,215 | 1,31E-05 |
| Tpgs2     | 8,53E-10 | -0,15502 | 0,224 | 0,409 | 1,35E-05 |
| Fbxo7     | 8,61E-10 | -0,22238 | 0,745 | 0,835 | 1,36E-05 |
| Ubac1     | 8,69E-10 | -0,15674 | 0,328 | 0,53  | 1,37E-05 |
| Rbx1      | 8,72E-10 | -0,15258 | 0,928 | 0,964 | 1,38E-05 |
| Lpcat2    | 8,81E-10 | -0,31641 | 0,257 | 0,441 | 1,39E-05 |
| Mrps12    | 8,82E-10 | -0,14303 | 0,385 | 0,608 | 1,39E-05 |
| Chmp1b    | 9,33E-10 | -0,16339 | 0,488 | 0,696 | 1,47E-05 |
| Exosc3    | 9,46E-10 | -0,13297 | 0,097 | 0,241 | 1,49E-05 |
| Mrps16    | 9,57E-10 | -0,16416 | 0,394 | 0,605 | 1,51E-05 |
| Med10     | 9,58E-10 | -0,12894 | 0,275 | 0,479 | 1,51E-05 |
| Dcun1d2   | 9,59E-10 | -0,14113 | 0,139 | 0,304 | 1,51E-05 |
| Cldnd1    | 9,76E-10 | -0,14812 | 0,98  | 0,981 | 1,54E-05 |
| Pdcl3     | 9,85E-10 | -0,1477  | 0,262 | 0,456 | 1,55E-05 |
| Dohh      | 1E-09    | -0,16063 | 0,319 | 0,527 | 1,58E-05 |
| Abcf3     | 1,02E-09 | -0,13695 | 0,277 | 0,479 | 1,61E-05 |
| Prpf31    | 1,03E-09 | -0,15002 | 0,288 | 0,483 | 1,63E-05 |
| Sec13     | 1,04E-09 | -0,18916 | 0,495 | 0,69  | 1,64E-05 |
| Ap4s1     | 1,06E-09 | -0,16418 | 0,275 | 0,473 | 1,67E-05 |
| Mad2l2    | 1,06E-09 | -0,15641 | 0,16  | 0,323 | 1,68E-05 |
| Gadd45gip | 1,07E-09 | -0,17122 | 0,404 | 0,618 | 1,69E-05 |
| Folh1     | 1,1E-09  | -0,15782 | 0,301 | 0,511 | 1,73E-05 |
| Mrpl50    | 1,1E-09  | -0,15119 | 0,207 | 0,386 | 1,74E-05 |
| Lrrc1     | 1,11E-09 | -0,15936 | 0,365 | 0,574 | 1,75E-05 |
| Mobp      | 1,12E-09 | -0,12673 | 1     | 0,998 | 1,77E-05 |
| Pradc1    | 1,13E-09 | -0,13654 | 0,163 | 0,333 | 1,78E-05 |
| Pcmt1     | 1,14E-09 | -0,19905 | 0,653 | 0,808 | 1,8E-05  |
| Zfp329    | 1,14E-09 | -0,11525 | 0,213 | 0,409 | 1,8E-05  |
| D1Ert622  | 1,15E-09 | 0,259385 | 0,927 | 0,895 | 1,82E-05 |
| Tomm20    | 1,17E-09 | -0,18401 | 0,908 | 0,943 | 1,84E-05 |
| Aven      | 1,18E-09 | -0,25    | 0,15  | 0,306 | 1,85E-05 |
| Nufip2    | 1,19E-09 | 0,309565 | 0,725 | 0,622 | 1,87E-05 |
| Sumo2     | 1,2E-09  | -0,17058 | 0,892 | 0,945 | 1,89E-05 |
| Gm12689   | 1,23E-09 | -0,10525 | 0,033 | 0,137 | 1,95E-05 |
| Sgms1     | 1,24E-09 | -0,1738  | 0,218 | 0,401 | 1,95E-05 |
| Fgfbp3    | 1,25E-09 | -0,15833 | 0,127 | 0,278 | 1,97E-05 |
| Glrx2     | 1,27E-09 | -0,15657 | 0,473 | 0,692 | 2,01E-05 |
| Dctn6     | 1,29E-09 | -0,17505 | 0,501 | 0,707 | 2,04E-05 |
| Dcdc2a    | 1,31E-09 | -0,17232 | 0,139 | 0,3   | 2,06E-05 |
| Cyp2j9    | 1,32E-09 | -0,12016 | 0,044 | 0,156 | 2,08E-05 |
| Cib1      | 1,32E-09 | -0,17228 | 0,22  | 0,392 | 2,09E-05 |
| Mcts1     | 1,35E-09 | -0,15494 | 0,297 | 0,498 | 2,13E-05 |
| Creld1    | 1,38E-09 | -0,17382 | 0,215 | 0,384 | 2,18E-05 |
| Nedd8     | 1,38E-09 | -0,1733  | 0,873 | 0,928 | 2,18E-05 |
| Coprs     | 1,39E-09 | -0,14601 | 0,125 | 0,274 | 2,19E-05 |
| 4931406C  | 1,4E-09  | -0,16514 | 0,314 | 0,519 | 2,21E-05 |
| Zc3hav1   | 1,42E-09 | 0,19173  | 0,237 | 0,097 | 2,24E-05 |
| Gskip     | 1,42E-09 | -0,14107 | 0,178 | 0,352 | 2,25E-05 |
| Tmem50a   | 1,44E-09 | -0,17491 | 0,943 | 0,968 | 2,27E-05 |

|           |          |          |       |       |          |
|-----------|----------|----------|-------|-------|----------|
| Nudt16    | 1,47E-09 | -0,14419 | 0,149 | 0,31  | 2,31E-05 |
| Izumo4    | 1,48E-09 | -0,14498 | 0,229 | 0,418 | 2,34E-05 |
| Cops5     | 1,5E-09  | -0,17309 | 0,64  | 0,814 | 2,36E-05 |
| Pop4      | 1,54E-09 | -0,1951  | 0,527 | 0,692 | 2,43E-05 |
| Aga       | 1,55E-09 | -0,1618  | 0,22  | 0,401 | 2,44E-05 |
| Dubr      | 1,57E-09 | -0,1553  | 0,18  | 0,357 | 2,48E-05 |
| Fam189a2  | 1,61E-09 | -0,14432 | 0,121 | 0,274 | 2,54E-05 |
| Pex13     | 1,64E-09 | -0,1615  | 0,325 | 0,53  | 2,59E-05 |
| Timm17b   | 1,64E-09 | -0,16757 | 0,314 | 0,506 | 2,59E-05 |
| 2410015M  | 1,65E-09 | -0,16763 | 0,763 | 0,869 | 2,6E-05  |
| Selenow   | 1,66E-09 | -0,13753 | 0,994 | 0,996 | 2,62E-05 |
| Ift20     | 1,67E-09 | -0,15992 | 0,615 | 0,793 | 2,64E-05 |
| Dixdc1    | 1,69E-09 | -0,17906 | 0,897 | 0,943 | 2,66E-05 |
| Prima1    | 1,71E-09 | -0,19407 | 0,439 | 0,65  | 2,7E-05  |
| Zfp286    | 1,72E-09 | -0,10129 | 0,026 | 0,122 | 2,71E-05 |
| Zfp943    | 1,73E-09 | -0,12457 | 0,09  | 0,228 | 2,73E-05 |
| Bnip3     | 1,73E-09 | -0,17279 | 0,402 | 0,612 | 2,73E-05 |
| Galnt11   | 1,74E-09 | -0,1508  | 0,231 | 0,414 | 2,75E-05 |
| Garem2    | 1,74E-09 | -0,13098 | 0,059 | 0,179 | 2,75E-05 |
| Eps15     | 1,76E-09 | -0,22422 | 0,844 | 0,903 | 2,78E-05 |
| Inpp5a    | 1,93E-09 | 0,265061 | 0,596 | 0,468 | 3,04E-05 |
| mt-Nd1    | 1,93E-09 | 0,167905 | 1     | 0,998 | 3,05E-05 |
| Ufsp2     | 1,95E-09 | -0,16074 | 0,299 | 0,498 | 3,08E-05 |
| C030006K: | 2,01E-09 | -0,11811 | 0,092 | 0,232 | 3,17E-05 |
| Wipi1     | 2,03E-09 | -0,18563 | 0,822 | 0,907 | 3,21E-05 |
| Ptp4a2    | 2,07E-09 | 0,208798 | 0,956 | 0,903 | 3,27E-05 |
| Ctss      | 2,08E-09 | -0,08971 | 0,018 | 0,108 | 3,28E-05 |
| Med7      | 2,16E-09 | -0,1453  | 0,213 | 0,388 | 3,41E-05 |
| Taf10     | 2,22E-09 | -0,18366 | 0,567 | 0,734 | 3,5E-05  |
| Dpyd      | 2,3E-09  | -0,14762 | 0,095 | 0,234 | 3,63E-05 |
| Oard1     | 2,32E-09 | -0,17373 | 0,31  | 0,508 | 3,67E-05 |
| AU040320  | 2,4E-09  | -0,15335 | 0,231 | 0,409 | 3,79E-05 |
| Snrnp25   | 2,4E-09  | -0,12022 | 0,117 | 0,268 | 3,79E-05 |
| Mrpl15    | 2,41E-09 | -0,14698 | 0,33  | 0,536 | 3,8E-05  |
| Jpt2      | 2,5E-09  | -0,22464 | 0,281 | 0,466 | 3,95E-05 |
| Ndst1     | 2,57E-09 | 0,234736 | 0,683 | 0,563 | 4,05E-05 |
| Slc25a11  | 2,57E-09 | -0,13958 | 0,417 | 0,637 | 4,06E-05 |
| Osbpl1a   | 2,6E-09  | -0,17358 | 0,98  | 0,992 | 4,1E-05  |
| Msl3      | 2,62E-09 | -0,15997 | 0,244 | 0,42  | 4,13E-05 |
| Elof1     | 2,62E-09 | -0,13958 | 0,343 | 0,557 | 4,13E-05 |
| Tmem143   | 2,7E-09  | -0,12949 | 0,086 | 0,219 | 4,27E-05 |
| Mrpl42    | 2,71E-09 | -0,15529 | 0,479 | 0,686 | 4,27E-05 |
| Atp5l     | 2,75E-09 | -0,1556  | 0,976 | 0,981 | 4,33E-05 |
| Atpaf1    | 2,75E-09 | -0,13673 | 0,211 | 0,39  | 4,34E-05 |
| E2f5      | 2,78E-09 | -0,13806 | 0,16  | 0,323 | 4,38E-05 |
| Phip      | 2,85E-09 | 0,262411 | 0,82  | 0,724 | 4,49E-05 |
| Mrps10    | 2,86E-09 | -0,12785 | 0,275 | 0,473 | 4,51E-05 |
| Fam216a   | 2,92E-09 | -0,12663 | 0,116 | 0,264 | 4,61E-05 |
| Tgfb1     | 2,98E-09 | 0,26476  | 0,339 | 0,184 | 4,7E-05  |
| Uqcc2     | 3,02E-09 | -0,18434 | 0,782 | 0,871 | 4,76E-05 |
| Uvssa     | 3,19E-09 | -0,17275 | 0,182 | 0,346 | 5,04E-05 |
| Phactr2   | 3,2E-09  | -0,13813 | 0,169 | 0,338 | 5,04E-05 |

|          |          |          |       |       |          |
|----------|----------|----------|-------|-------|----------|
| Inpp5j   | 3,25E-09 | -0,12299 | 0,086 | 0,222 | 5,13E-05 |
| Mzt1     | 3,27E-09 | -0,15712 | 0,317 | 0,506 | 5,16E-05 |
| Ndfip2   | 3,31E-09 | -0,19425 | 0,763 | 0,863 | 5,23E-05 |
| Srebf1   | 3,36E-09 | -0,16745 | 0,47  | 0,669 | 5,31E-05 |
| Dbil5    | 3,37E-09 | -0,1163  | 0,037 | 0,139 | 5,32E-05 |
| Tppp     | 3,4E-09  | 0,189901 | 0,996 | 0,977 | 5,37E-05 |
| Gm4924   | 3,48E-09 | -0,12454 | 0,084 | 0,217 | 5,49E-05 |
| Thoc7    | 3,52E-09 | -0,17293 | 0,363 | 0,568 | 5,56E-05 |
| Ola1     | 3,57E-09 | -0,1686  | 0,363 | 0,572 | 5,63E-05 |
| Plcl1    | 3,57E-09 | -0,17789 | 0,956 | 0,964 | 5,64E-05 |
| Nkiras1  | 3,59E-09 | -0,14973 | 0,391 | 0,593 | 5,67E-05 |
| Faim2    | 3,66E-09 | -0,19928 | 0,895 | 0,932 | 5,77E-05 |
| Gm26802  | 3,7E-09  | 0,304627 | 0,086 | 0,006 | 5,83E-05 |
| Eef1a1   | 3,76E-09 | -0,1107  | 1     | 0,998 | 5,93E-05 |
| Tyw5     | 3,76E-09 | -0,12041 | 0,121 | 0,27  | 5,93E-05 |
| Endog    | 3,9E-09  | -0,12321 | 0,106 | 0,249 | 6,16E-05 |
| Paics    | 3,92E-09 | -0,17297 | 0,802 | 0,897 | 6,19E-05 |
| Spry2    | 3,93E-09 | -0,12744 | 0,196 | 0,376 | 6,2E-05  |
| Trappc2  | 3,97E-09 | -0,14897 | 0,383 | 0,589 | 6,27E-05 |
| Ppp1r35  | 3,98E-09 | -0,13101 | 0,226 | 0,409 | 6,28E-05 |
| Bace1    | 4E-09    | -0,23588 | 0,778 | 0,857 | 6,31E-05 |
| Med30    | 4,12E-09 | -0,17165 | 0,488 | 0,684 | 6,5E-05  |
| Magoh    | 4,16E-09 | -0,13566 | 0,292 | 0,487 | 6,56E-05 |
| Ctso     | 4,24E-09 | -0,13958 | 0,261 | 0,451 | 6,68E-05 |
| Runx2    | 4,25E-09 | 0,14026  | 0,099 | 0,013 | 6,7E-05  |
| Opcml    | 4,26E-09 | -0,12464 | 0,09  | 0,224 | 6,72E-05 |
| Tmem237  | 4,28E-09 | -0,14334 | 0,303 | 0,504 | 6,76E-05 |
| Mrps25   | 4,37E-09 | -0,14872 | 0,383 | 0,599 | 6,89E-05 |
| Ube2v2   | 4,4E-09  | -0,13853 | 0,428 | 0,652 | 6,94E-05 |
| Pick1    | 4,44E-09 | -0,14713 | 0,308 | 0,502 | 7E-05    |
| Gemin7   | 4,5E-09  | -0,14459 | 0,332 | 0,527 | 7,1E-05  |
| Mrpl51   | 4,61E-09 | -0,16171 | 0,492 | 0,681 | 7,27E-05 |
| Polr2l   | 4,68E-09 | -0,14318 | 0,325 | 0,538 | 7,38E-05 |
| Cdc123   | 4,69E-09 | -0,15529 | 0,47  | 0,667 | 7,4E-05  |
| Scrn1    | 4,74E-09 | 0,254106 | 0,532 | 0,401 | 7,49E-05 |
| Pigq     | 4,76E-09 | 0,228595 | 0,761 | 0,665 | 7,51E-05 |
| Ccnl2    | 4,8E-09  | 0,234445 | 0,809 | 0,73  | 7,57E-05 |
| Smim19   | 4,83E-09 | -0,16765 | 0,389 | 0,584 | 7,61E-05 |
| Snx15    | 4,83E-09 | -0,19733 | 0,75  | 0,886 | 7,62E-05 |
| Ubac2    | 4,84E-09 | -0,14943 | 0,233 | 0,409 | 7,64E-05 |
| 9330199G | 4,87E-09 | -0,10892 | 0,031 | 0,129 | 7,68E-05 |
| Zer1     | 4,89E-09 | -0,1764  | 0,497 | 0,698 | 7,71E-05 |
| Rnf112   | 4,89E-09 | -0,16493 | 0,266 | 0,454 | 7,72E-05 |
| Hsbp1    | 4,9E-09  | -0,15507 | 0,98  | 0,989 | 7,74E-05 |
| Prox1os  | 4,96E-09 | -0,19099 | 0,314 | 0,504 | 7,82E-05 |
| Rnaseh1  | 4,97E-09 | -0,12882 | 0,163 | 0,325 | 7,84E-05 |
| Ugt8a    | 5,08E-09 | -0,13875 | 0,998 | 0,998 | 8,01E-05 |
| Elovl7   | 5,21E-09 | -0,19904 | 0,952 | 0,973 | 8,23E-05 |
| Cd320    | 5,24E-09 | -0,12496 | 0,114 | 0,257 | 8,27E-05 |
| Gm33594  | 5,36E-09 | -0,16205 | 0,211 | 0,382 | 8,45E-05 |
| Enpp1    | 5,62E-09 | -0,15827 | 0,248 | 0,424 | 8,86E-05 |
| Smim20   | 5,66E-09 | -0,16071 | 0,367 | 0,557 | 8,92E-05 |

|          |          |          |       |       |          |
|----------|----------|----------|-------|-------|----------|
| Clcn2    | 5,72E-09 | -0,17165 | 0,29  | 0,468 | 9,03E-05 |
| Hspa14   | 5,87E-09 | -0,11588 | 0,226 | 0,416 | 9,26E-05 |
| Vti1b    | 5,89E-09 | -0,18855 | 0,528 | 0,705 | 9,28E-05 |
| Stx8     | 5,91E-09 | -0,14207 | 0,33  | 0,53  | 9,32E-05 |
| Tmem38b  | 6,03E-09 | -0,16792 | 0,361 | 0,557 | 9,51E-05 |
| Tmbim4   | 6,04E-09 | -0,16077 | 0,71  | 0,844 | 9,53E-05 |
| Gcat     | 6,21E-09 | -0,13958 | 0,209 | 0,382 | 9,79E-05 |
| Ebp      | 6,21E-09 | -0,17345 | 0,528 | 0,724 | 9,8E-05  |
| Lap3     | 6,23E-09 | -0,19878 | 0,967 | 0,973 | 9,83E-05 |
| Fam204a  | 6,31E-09 | -0,16475 | 0,521 | 0,728 | 9,95E-05 |
| Znrd1    | 6,32E-09 | -0,12887 | 0,279 | 0,475 | 9,97E-05 |
| Mrps17   | 6,34E-09 | -0,16338 | 0,394 | 0,591 | 0,0001   |
| Dennd5a  | 6,37E-09 | 0,217146 | 0,978 | 0,932 | 0,000101 |
| Snx1     | 6,38E-09 | -0,16597 | 0,811 | 0,886 | 0,000101 |
| Blvra    | 6,4E-09  | -0,14099 | 0,24  | 0,42  | 0,000101 |
| Git1     | 6,51E-09 | 0,207731 | 0,875 | 0,795 | 0,000103 |
| Ybx3     | 6,53E-09 | -0,18383 | 0,793 | 0,888 | 0,000103 |
| Efr3b    | 6,56E-09 | -0,14663 | 0,189 | 0,359 | 0,000104 |
| Psma5    | 6,57E-09 | -0,18172 | 0,664 | 0,774 | 0,000104 |
| Gpd1     | 6,64E-09 | -0,17237 | 0,521 | 0,696 | 0,000105 |
| Cdc26    | 6,65E-09 | -0,13261 | 0,374 | 0,593 | 0,000105 |
| Ppp1cb   | 6,69E-09 | 0,207328 | 0,93  | 0,846 | 0,000106 |
| Flnb     | 6,7E-09  | 0,291883 | 0,58  | 0,46  | 0,000106 |
| Washc3   | 6,74E-09 | -0,13662 | 0,182 | 0,35  | 0,000106 |
| Tmco1    | 6,82E-09 | -0,1833  | 0,657 | 0,812 | 0,000108 |
| Kdm2a    | 6,9E-09  | 0,265545 | 0,701 | 0,597 | 0,000109 |
| Hmgn3    | 6,95E-09 | -0,15685 | 0,194 | 0,357 | 0,00011  |
| Mrpl11   | 6,99E-09 | -0,13395 | 0,402 | 0,62  | 0,00011  |
| Nckap5   | 7E-09    | 0,195777 | 0,191 | 0,07  | 0,00011  |
| Xrcc4    | 7,09E-09 | -0,12915 | 0,18  | 0,346 | 0,000112 |
| Pkd2l1   | 7,12E-09 | -0,18798 | 0,086 | 0,213 | 0,000112 |
| Tbcd     | 7,25E-09 | -0,16281 | 0,272 | 0,456 | 0,000114 |
| Itsn2    | 7,3E-09  | 0,247982 | 0,815 | 0,719 | 0,000115 |
| Commd6   | 7,34E-09 | -0,15652 | 0,635 | 0,81  | 0,000116 |
| Foxn3    | 7,35E-09 | 0,208437 | 0,996 | 0,996 | 0,000116 |
| Tmem192  | 7,39E-09 | -0,15213 | 0,312 | 0,496 | 0,000117 |
| Fra10ac1 | 7,56E-09 | -0,12603 | 0,174 | 0,338 | 0,000119 |
| Igtp     | 7,6E-09  | 0,330425 | 0,088 | 0,008 | 0,00012  |
| Gm30025  | 7,62E-09 | -0,13795 | 0,116 | 0,253 | 0,00012  |
| Chordc1  | 7,62E-09 | -0,17481 | 0,488 | 0,671 | 0,00012  |
| Ppil3    | 7,64E-09 | -0,14252 | 0,191 | 0,357 | 0,000121 |
| Brms1    | 7,84E-09 | -0,14088 | 0,295 | 0,487 | 0,000124 |
| Slc2a8   | 7,87E-09 | -0,13639 | 0,13  | 0,276 | 0,000124 |
| Ppid     | 8,06E-09 | -0,1619  | 0,527 | 0,722 | 0,000127 |
| Cisd3    | 8,07E-09 | -0,12065 | 0,134 | 0,285 | 0,000127 |
| Steap3   | 8,11E-09 | 0,204813 | 0,217 | 0,084 | 0,000128 |
| Yipf3    | 8,15E-09 | -0,16584 | 0,49  | 0,684 | 0,000129 |
| Hadhb    | 8,22E-09 | -0,17332 | 0,666 | 0,81  | 0,00013  |
| Bccip    | 8,24E-09 | -0,14754 | 0,279 | 0,464 | 0,00013  |
| Psmd13   | 8,47E-09 | -0,16792 | 0,582 | 0,741 | 0,000134 |
| Smim11   | 8,63E-09 | -0,14627 | 0,411 | 0,612 | 0,000136 |
| Tprkb    | 8,64E-09 | -0,17633 | 0,503 | 0,688 | 0,000136 |

|           |          |          |       |       |          |
|-----------|----------|----------|-------|-------|----------|
| Unc50     | 8,69E-09 | -0,17273 | 0,694 | 0,833 | 0,000137 |
| Mrpl54    | 8,7E-09  | -0,1665  | 0,369 | 0,553 | 0,000137 |
| Dgcr6     | 8,83E-09 | -0,1474  | 0,29  | 0,479 | 0,000139 |
| Clns1a    | 8,85E-09 | -0,14734 | 0,428 | 0,627 | 0,00014  |
| Atraid    | 8,96E-09 | -0,15743 | 0,866 | 0,916 | 0,000141 |
| Atg3      | 8,99E-09 | -0,17404 | 0,741 | 0,85  | 0,000142 |
| Tmem144   | 9,13E-09 | -0,19885 | 0,539 | 0,707 | 0,000144 |
| Suclg1    | 9,39E-09 | -0,16154 | 0,558 | 0,757 | 0,000148 |
| Txn14a    | 9,75E-09 | -0,16396 | 0,435 | 0,618 | 0,000154 |
| Jagn1     | 9,92E-09 | -0,12509 | 0,354 | 0,57  | 0,000156 |
| Tead1     | 1E-08    | 0,212881 | 0,194 | 0,074 | 0,000158 |
| Park7     | 1,02E-08 | -0,14597 | 0,943 | 0,977 | 0,000161 |
| Ddr1      | 1,03E-08 | 0,172843 | 0,993 | 0,981 | 0,000162 |
| Gm49012   | 1,03E-08 | -0,10772 | 0,048 | 0,154 | 0,000163 |
| Mtx2      | 1,04E-08 | -0,15222 | 0,461 | 0,665 | 0,000164 |
| Lamtor4   | 1,05E-08 | -0,16309 | 0,606 | 0,759 | 0,000166 |
| Mrpl40    | 1,06E-08 | -0,1461  | 0,295 | 0,479 | 0,000168 |
| Ublcp1    | 1,11E-08 | -0,17927 | 0,341 | 0,515 | 0,000176 |
| Zfp955b   | 1,15E-08 | -0,09883 | 0,051 | 0,16  | 0,000181 |
| Them6     | 1,17E-08 | -0,10999 | 0,062 | 0,177 | 0,000185 |
| Lsm8      | 1,18E-08 | -0,13128 | 0,349 | 0,559 | 0,000186 |
| Exosc7    | 1,18E-08 | -0,12291 | 0,235 | 0,416 | 0,000187 |
| Scmh1     | 1,21E-08 | -0,14648 | 0,215 | 0,386 | 0,000191 |
| Abat      | 1,21E-08 | -0,12474 | 0,163 | 0,325 | 0,000191 |
| Crip2     | 1,22E-08 | 0,304613 | 0,435 | 0,297 | 0,000193 |
| Itgb1bp1  | 1,22E-08 | -0,13031 | 0,284 | 0,47  | 0,000193 |
| Fam92a    | 1,22E-08 | -0,13286 | 0,259 | 0,441 | 0,000193 |
| Pym1      | 1,27E-08 | -0,12101 | 0,092 | 0,219 | 0,0002   |
| Ost4      | 1,29E-08 | -0,18    | 0,727 | 0,821 | 0,000204 |
| Zbtb16    | 1,29E-08 | -0,1364  | 0,125 | 0,266 | 0,000204 |
| Igbp1     | 1,32E-08 | -0,1408  | 0,327 | 0,523 | 0,000208 |
| Rpsa      | 1,32E-08 | 0,238606 | 1     | 0,998 | 0,000209 |
| Cnrip1    | 1,35E-08 | -0,13341 | 0,136 | 0,283 | 0,000212 |
| 1810024B( | 1,36E-08 | -0,09404 | 0,048 | 0,154 | 0,000214 |
| Abca5     | 1,38E-08 | 0,292978 | 0,466 | 0,321 | 0,000217 |
| Mydgf     | 1,38E-08 | -0,15376 | 0,558 | 0,747 | 0,000218 |
| Efs       | 1,39E-08 | 0,227097 | 0,332 | 0,184 | 0,00022  |
| Gm36855   | 1,4E-08  | -0,10171 | 0,064 | 0,181 | 0,00022  |
| Tbc1d5    | 1,41E-08 | -0,1733  | 0,538 | 0,73  | 0,000222 |
| Al480526  | 1,44E-08 | -0,1453  | 0,191 | 0,357 | 0,000228 |
| Ctnnal1   | 1,46E-08 | -0,15281 | 0,251 | 0,424 | 0,000231 |
| Ttll7     | 1,51E-08 | -0,14551 | 1     | 0,996 | 0,000238 |
| Dab1      | 1,53E-08 | -0,0934  | 0,015 | 0,093 | 0,000241 |
| Erlec1    | 1,54E-08 | -0,148   | 0,31  | 0,502 | 0,000243 |
| Yaf2      | 1,55E-08 | -0,16335 | 0,389 | 0,572 | 0,000244 |
| Rmdn3     | 1,55E-08 | -0,12959 | 0,218 | 0,392 | 0,000244 |
| Mrpl14    | 1,57E-08 | -0,15421 | 0,477 | 0,669 | 0,000248 |
| Mblac2    | 1,6E-08  | -0,15081 | 0,218 | 0,384 | 0,000252 |
| Dap3      | 1,62E-08 | -0,11636 | 0,33  | 0,536 | 0,000256 |
| Ccs       | 1,64E-08 | -0,13836 | 0,352 | 0,557 | 0,000259 |
| Ntmt1     | 1,64E-08 | -0,13958 | 0,213 | 0,38  | 0,000259 |
| Lsm1      | 1,65E-08 | -0,13537 | 0,242 | 0,414 | 0,000261 |



|           |          |          |       |       |          |
|-----------|----------|----------|-------|-------|----------|
| Canx      | 1,67E-08 | 0,185537 | 0,994 | 0,987 | 0,000263 |
| Cnih1     | 1,68E-08 | -0,17328 | 0,628 | 0,77  | 0,000265 |
| Gprc5b    | 1,7E-08  | -0,16838 | 0,974 | 0,981 | 0,000268 |
| Trnau1ap  | 1,7E-08  | -0,14969 | 0,213 | 0,373 | 0,000269 |
| Fundc2    | 1,7E-08  | -0,14437 | 0,334 | 0,525 | 0,000269 |
| Zfyve19   | 1,72E-08 | -0,1304  | 0,161 | 0,319 | 0,000271 |
| 2700046G  | 1,77E-08 | -0,08926 | 0,062 | 0,177 | 0,000278 |
| Enoph1    | 1,77E-08 | -0,19894 | 0,606 | 0,745 | 0,000279 |
| Mest      | 1,79E-08 | -0,11954 | 0,09  | 0,217 | 0,000282 |
| Sbsn      | 1,82E-08 | -0,11451 | 0,094 | 0,222 | 0,000287 |
| Dapk3     | 1,83E-08 | -0,15406 | 0,292 | 0,468 | 0,000289 |
| Commd4    | 1,87E-08 | -0,16171 | 0,523 | 0,709 | 0,000294 |
| Mcat      | 1,87E-08 | -0,10734 | 0,09  | 0,217 | 0,000296 |
| Tsc22d3   | 1,91E-08 | -0,17126 | 0,4   | 0,584 | 0,000302 |
| Scrg1     | 1,95E-08 | -0,07226 | 0,011 | 0,084 | 0,000307 |
| 3110040N  | 1,97E-08 | -0,1228  | 0,092 | 0,217 | 0,00031  |
| 3222401L1 | 1,97E-08 | -0,13958 | 0,217 | 0,395 | 0,00031  |
| Fbxw5     | 2,04E-08 | -0,1282  | 0,237 | 0,411 | 0,000322 |
| Dnajb1    | 2,06E-08 | 0,642325 | 0,578 | 0,492 | 0,000324 |
| Cby1      | 2,07E-08 | -0,12438 | 0,18  | 0,338 | 0,000326 |
| Slc16a1   | 2,09E-08 | -0,18855 | 0,664 | 0,819 | 0,00033  |
| Arid1a    | 2,12E-08 | 0,239247 | 0,69  | 0,61  | 0,000334 |
| Scd3      | 2,2E-08  | -0,15755 | 0,189 | 0,346 | 0,000347 |
| Tex264    | 2,27E-08 | -0,14674 | 0,479 | 0,686 | 0,000358 |
| Kmt2e     | 2,27E-08 | 0,22729  | 0,927 | 0,886 | 0,000358 |
| Ttc1      | 2,29E-08 | -0,15902 | 0,464 | 0,656 | 0,000361 |
| Ndufaf5   | 2,31E-08 | -0,11581 | 0,084 | 0,207 | 0,000365 |
| Armcx5    | 2,32E-08 | -0,11959 | 0,141 | 0,289 | 0,000365 |
| Lrrc8b    | 2,32E-08 | 0,217325 | 0,859 | 0,755 | 0,000367 |
| Dnal4     | 2,34E-08 | -0,1247  | 0,2   | 0,363 | 0,000369 |
| Prelid3b  | 2,39E-08 | -0,14087 | 0,297 | 0,479 | 0,000377 |
| Ecsit     | 2,39E-08 | -0,12966 | 0,211 | 0,378 | 0,000377 |
| Med9      | 2,39E-08 | -0,12888 | 0,171 | 0,325 | 0,000377 |
| Rpl22l1   | 2,4E-08  | -0,16381 | 0,701 | 0,825 | 0,000378 |
| Gas2      | 2,4E-08  | -0,11628 | 0,092 | 0,219 | 0,000379 |
| Med8      | 2,46E-08 | -0,13097 | 0,336 | 0,534 | 0,000389 |
| Nup35     | 2,48E-08 | -0,12948 | 0,206 | 0,369 | 0,000391 |
| Znhit1    | 2,59E-08 | -0,17426 | 0,574 | 0,741 | 0,000408 |
| Hspe1     | 2,59E-08 | -0,1522  | 0,861 | 0,922 | 0,000408 |
| Taf1d     | 2,61E-08 | 0,265523 | 0,683 | 0,599 | 0,000412 |
| Gas7      | 2,62E-08 | 0,197582 | 0,939 | 0,895 | 0,000413 |
| Psm2      | 2,64E-08 | -0,14077 | 0,853 | 0,922 | 0,000416 |
| Pkig      | 2,64E-08 | -0,13222 | 0,198 | 0,359 | 0,000417 |
| Tmem80    | 2,66E-08 | -0,16007 | 0,444 | 0,65  | 0,000419 |
| Narfl     | 2,76E-08 | -0,12403 | 0,156 | 0,306 | 0,000435 |
| Creg2     | 2,78E-08 | -0,10398 | 0,103 | 0,238 | 0,000439 |
| D030056L  | 2,86E-08 | -0,12494 | 0,281 | 0,466 | 0,00045  |
| Pdk3      | 2,86E-08 | -0,14471 | 0,264 | 0,441 | 0,000451 |
| Med31     | 2,86E-08 | -0,13192 | 0,413 | 0,622 | 0,000452 |
| Mdga2     | 2,91E-08 | -0,15751 | 0,44  | 0,639 | 0,000459 |
| Eef1akmt2 | 2,95E-08 | -0,12481 | 0,182 | 0,342 | 0,000466 |
| Derl2     | 2,97E-08 | -0,14187 | 0,376 | 0,572 | 0,000469 |

|           |          |          |       |       |          |
|-----------|----------|----------|-------|-------|----------|
| Stxbp6    | 2,99E-08 | -0,16933 | 0,561 | 0,73  | 0,000472 |
| Jtb       | 3,01E-08 | -0,15022 | 0,578 | 0,762 | 0,000474 |
| Pold4     | 3,08E-08 | -0,14982 | 0,198 | 0,352 | 0,000486 |
| Tyro3     | 3,11E-08 | 0,231316 | 0,928 | 0,85  | 0,000491 |
| Wdr83os   | 3,14E-08 | -0,15418 | 0,462 | 0,658 | 0,000495 |
| Morn2     | 3,17E-08 | -0,12682 | 0,125 | 0,262 | 0,0005   |
| Prim2     | 3,19E-08 | -0,11069 | 0,075 | 0,194 | 0,000503 |
| Pantr1    | 3,19E-08 | -0,17206 | 0,288 | 0,468 | 0,000503 |
| Scrn3     | 3,19E-08 | -0,13091 | 0,209 | 0,373 | 0,000504 |
| Wasf3     | 3,21E-08 | -0,15376 | 0,121 | 0,255 | 0,000507 |
| Prnp      | 3,22E-08 | 0,150633 | 1     | 0,987 | 0,000509 |
| Psmg4     | 3,29E-08 | -0,15882 | 0,288 | 0,458 | 0,000518 |
| Eif2b3    | 3,35E-08 | -0,13958 | 0,224 | 0,395 | 0,000529 |
| Ndufaf3   | 3,39E-08 | -0,14203 | 0,332 | 0,515 | 0,000534 |
| Fbl       | 3,41E-08 | 0,308202 | 0,672 | 0,597 | 0,000538 |
| Ahsa1     | 3,44E-08 | -0,20656 | 0,732 | 0,819 | 0,000542 |
| Stoml2    | 3,54E-08 | -0,12812 | 0,316 | 0,5   | 0,000559 |
| Uap1      | 3,58E-08 | -0,15667 | 0,325 | 0,502 | 0,000564 |
| Tm2d2     | 3,61E-08 | -0,15487 | 0,708 | 0,829 | 0,000569 |
| Mrps31    | 3,64E-08 | -0,14097 | 0,248 | 0,411 | 0,000574 |
| Gm42372   | 3,66E-08 | -0,15752 | 0,182 | 0,335 | 0,000577 |
| Tceal1    | 3,67E-08 | -0,13682 | 0,237 | 0,405 | 0,000579 |
| Gpr180    | 3,71E-08 | -0,10925 | 0,128 | 0,27  | 0,000586 |
| Cops6     | 3,74E-08 | -0,16222 | 0,651 | 0,81  | 0,000589 |
| Tmem229a  | 3,74E-08 | -0,19047 | 0,894 | 0,939 | 0,000589 |
| Pik3r1    | 3,75E-08 | 0,204445 | 0,978 | 0,947 | 0,000591 |
| Map2k5    | 3,78E-08 | -0,12253 | 0,224 | 0,392 | 0,000597 |
| Macrocl1  | 3,83E-08 | -0,14742 | 0,288 | 0,456 | 0,000603 |
| Ncbp2     | 3,83E-08 | -0,15538 | 0,453 | 0,631 | 0,000604 |
| 1110059G  | 3,88E-08 | -0,11605 | 0,233 | 0,405 | 0,000611 |
| Ogdhl     | 3,9E-08  | -0,17826 | 0,139 | 0,281 | 0,000616 |
| Dhrs4     | 3,91E-08 | -0,11454 | 0,147 | 0,293 | 0,000617 |
| Nqo1      | 3,96E-08 | -0,11899 | 0,064 | 0,175 | 0,000624 |
| Imp3      | 4,02E-08 | -0,14972 | 0,679 | 0,812 | 0,000634 |
| Dmac1     | 4,02E-08 | -0,13681 | 0,25  | 0,416 | 0,000634 |
| Gpnmb     | 4,04E-08 | -0,06672 | 0,011 | 0,082 | 0,000638 |
| Sox11     | 4,1E-08  | 0,337485 | 0,106 | 0,021 | 0,000646 |
| Rhbdd2    | 4,11E-08 | -0,13244 | 0,224 | 0,386 | 0,000648 |
| Hnrnpdl   | 4,11E-08 | 0,19307  | 0,963 | 0,96  | 0,000648 |
| Ankrd28   | 4,12E-08 | 0,224218 | 0,934 | 0,84  | 0,00065  |
| Arid5b    | 4,14E-08 | 0,283126 | 0,758 | 0,681 | 0,000652 |
| Coa4      | 4,15E-08 | -0,09747 | 0,057 | 0,165 | 0,000654 |
| Hist3h2ba | 4,18E-08 | -0,19427 | 0,365 | 0,546 | 0,00066  |
| Galnt12   | 4,2E-08  | -0,09264 | 0,033 | 0,124 | 0,000662 |
| Mrps24    | 4,24E-08 | -0,15367 | 0,563 | 0,726 | 0,000669 |
| Pcdh11x   | 4,24E-08 | -0,12519 | 0,097 | 0,224 | 0,000669 |
| Chst12    | 4,3E-08  | -0,12479 | 0,187 | 0,346 | 0,000678 |
| Zfp976    | 4,34E-08 | -0,08432 | 0,018 | 0,097 | 0,000684 |
| Msl3l2    | 4,45E-08 | -0,13808 | 0,185 | 0,335 | 0,000702 |
| Adora1    | 4,48E-08 | -0,1688  | 0,547 | 0,732 | 0,000707 |
| Smn1      | 4,49E-08 | -0,10973 | 0,178 | 0,333 | 0,000709 |
| Clock     | 4,53E-08 | 0,20365  | 0,772 | 0,637 | 0,000715 |

|           |          |          |       |       |          |
|-----------|----------|----------|-------|-------|----------|
| Rpl29     | 4,54E-08 | -0,15041 | 0,96  | 0,973 | 0,000717 |
| Atp1b3    | 4,58E-08 | 0,223877 | 0,998 | 0,989 | 0,000722 |
| Tma16     | 4,6E-08  | -0,1356  | 0,2   | 0,363 | 0,000726 |
| Smim1     | 4,68E-08 | -0,19272 | 0,479 | 0,652 | 0,000739 |
| Idh3a     | 4,74E-08 | -0,12498 | 0,345 | 0,538 | 0,000747 |
| Map6      | 4,75E-08 | 0,260448 | 0,571 | 0,479 | 0,00075  |
| Tmem178k  | 4,77E-08 | 0,224281 | 0,895 | 0,819 | 0,000752 |
| Abhd16a   | 4,78E-08 | -0,15505 | 0,455 | 0,641 | 0,000754 |
| Dda1      | 4,79E-08 | -0,15769 | 0,506 | 0,684 | 0,000756 |
| Dnajb6    | 4,82E-08 | -0,14154 | 0,818 | 0,901 | 0,00076  |
| Dnajc17   | 4,83E-08 | -0,10614 | 0,172 | 0,329 | 0,000761 |
| Cdh20     | 4,84E-08 | -0,14936 | 0,317 | 0,502 | 0,000763 |
| Mtus1     | 4,88E-08 | -0,17727 | 0,738 | 0,867 | 0,00077  |
| Dctn2     | 4,94E-08 | -0,14764 | 0,949 | 0,97  | 0,000779 |
| Nktr      | 4,96E-08 | 0,204497 | 0,928 | 0,892 | 0,000782 |
| Znhit3    | 5,04E-08 | -0,12231 | 0,217 | 0,38  | 0,000795 |
| Ccdc167   | 5,09E-08 | -0,11757 | 0,13  | 0,272 | 0,000804 |
| Nrn1l     | 5,16E-08 | -0,09105 | 0,039 | 0,133 | 0,000814 |
| Naxe      | 5,16E-08 | -0,16436 | 0,618 | 0,776 | 0,000815 |
| Lztf1     | 5,27E-08 | -0,15728 | 0,341 | 0,521 | 0,000831 |
| Ccdc91    | 5,28E-08 | -0,15029 | 0,161 | 0,304 | 0,000833 |
| Mettl22   | 5,32E-08 | -0,10363 | 0,114 | 0,247 | 0,00084  |
| Snap23    | 5,35E-08 | -0,14231 | 0,25  | 0,424 | 0,000843 |
| Sh3bgrl3  | 5,38E-08 | -0,12911 | 0,983 | 0,994 | 0,000848 |
| 95300590  | 5,46E-08 | -0,13646 | 0,119 | 0,253 | 0,000861 |
| Osgin2    | 5,47E-08 | -0,1244  | 0,165 | 0,314 | 0,000864 |
| Gosr1     | 5,48E-08 | -0,13958 | 0,345 | 0,53  | 0,000865 |
| Slc25a5   | 5,51E-08 | -0,162   | 0,71  | 0,819 | 0,00087  |
| Clcc1     | 5,54E-08 | -0,13026 | 0,284 | 0,464 | 0,000873 |
| Zfp830    | 5,56E-08 | -0,12635 | 0,194 | 0,354 | 0,000878 |
| Zfp934    | 5,69E-08 | -0,1296  | 0,099 | 0,222 | 0,000898 |
| Sik2      | 5,72E-08 | -0,12271 | 0,242 | 0,424 | 0,000903 |
| Chka      | 5,76E-08 | 0,549322 | 0,556 | 0,475 | 0,000909 |
| Trub2     | 5,79E-08 | -0,13251 | 0,217 | 0,382 | 0,000914 |
| Carhsp1   | 5,91E-08 | -0,14185 | 0,963 | 0,977 | 0,000932 |
| March5    | 5,94E-08 | -0,1329  | 0,418 | 0,612 | 0,000938 |
| Dtymk     | 5,95E-08 | -0,15021 | 0,354 | 0,538 | 0,000938 |
| Ywhae     | 5,97E-08 | -0,10884 | 1     | 0,998 | 0,000942 |
| Gm28782   | 6,03E-08 | -0,07007 | 0,011 | 0,08  | 0,000951 |
| Ndufs8    | 6,17E-08 | -0,16416 | 0,561 | 0,732 | 0,000973 |
| Fam103a1  | 6,18E-08 | -0,11763 | 0,259 | 0,435 | 0,000974 |
| B4gat1    | 6,18E-08 | -0,14468 | 0,613 | 0,783 | 0,000975 |
| 1600020EC | 6,2E-08  | -0,12599 | 0,174 | 0,323 | 0,000978 |
| Rab10     | 6,3E-08  | -0,12384 | 0,983 | 0,977 | 0,000993 |
| Rogdi     | 6,33E-08 | -0,13148 | 0,121 | 0,251 | 0,000999 |
| Timm10b   | 6,43E-08 | -0,15572 | 0,517 | 0,7   | 0,001014 |
| Zfp606    | 6,43E-08 | -0,13332 | 0,15  | 0,291 | 0,001015 |
| St3gal4   | 6,45E-08 | 0,218201 | 0,833 | 0,738 | 0,001018 |
| Ddx17     | 6,48E-08 | 0,176502 | 0,914 | 0,827 | 0,001022 |
| Commd1    | 6,58E-08 | -0,14202 | 0,646 | 0,819 | 0,001039 |
| Pacsin3   | 6,58E-08 | -0,15584 | 0,473 | 0,66  | 0,001039 |
| Manf      | 6,61E-08 | -0,20688 | 0,547 | 0,711 | 0,001043 |

|           |          |          |       |       |          |
|-----------|----------|----------|-------|-------|----------|
| mt-Nd3    | 6,61E-08 | 0,182003 | 1     | 0,998 | 0,001043 |
| Rbm39     | 6,84E-08 | 0,158422 | 0,998 | 0,992 | 0,001079 |
| Cinp      | 6,88E-08 | -0,11265 | 0,217 | 0,386 | 0,001085 |
| Ppp2r3c   | 6,94E-08 | -0,1582  | 0,295 | 0,464 | 0,001095 |
| Col6a3    | 6,97E-08 | -0,08847 | 0,024 | 0,105 | 0,0011   |
| Lsm12     | 7,06E-08 | -0,13103 | 0,45  | 0,643 | 0,001114 |
| Polr1d    | 7,26E-08 | -0,14788 | 0,565 | 0,747 | 0,001146 |
| BC003965  | 7,37E-08 | -0,12974 | 0,347 | 0,534 | 0,001163 |
| Nkiras2   | 7,38E-08 | -0,1083  | 0,11  | 0,241 | 0,001164 |
| Vps29     | 7,41E-08 | -0,1628  | 0,752 | 0,85  | 0,001168 |
| Minos1    | 7,48E-08 | -0,15061 | 0,794 | 0,876 | 0,00118  |
| Coq7      | 7,54E-08 | -0,11747 | 0,349 | 0,553 | 0,001189 |
| Nlk       | 7,72E-08 | -0,14084 | 0,283 | 0,468 | 0,001219 |
| Zfp637    | 7,75E-08 | -0,14317 | 0,369 | 0,555 | 0,001223 |
| Mpv17l2   | 7,76E-08 | -0,13031 | 0,272 | 0,445 | 0,001225 |
| Mpst      | 7,92E-08 | -0,16747 | 0,622 | 0,787 | 0,001249 |
| Urod      | 7,98E-08 | -0,14473 | 0,319 | 0,485 | 0,001259 |
| Lhfp12    | 8,17E-08 | -0,0882  | 0,077 | 0,194 | 0,00129  |
| Rps13     | 8,2E-08  | -0,11717 | 0,993 | 0,994 | 0,001294 |
| Naxd      | 8,24E-08 | -0,17048 | 0,604 | 0,768 | 0,0013   |
| Rpl7l1    | 8,32E-08 | -0,13058 | 0,301 | 0,481 | 0,001312 |
| Ppa2      | 8,42E-08 | -0,11086 | 0,281 | 0,462 | 0,001328 |
| Rps27a    | 8,44E-08 | -0,11324 | 1     | 0,998 | 0,001331 |
| Capn6     | 8,47E-08 | 0,07764  | 0,059 | 0     | 0,001337 |
| Rpl15     | 8,48E-08 | -0,13343 | 0,987 | 0,983 | 0,001337 |
| Nxt1      | 8,5E-08  | -0,11451 | 0,094 | 0,215 | 0,001341 |
| Smim12    | 8,51E-08 | -0,11887 | 0,264 | 0,439 | 0,001343 |
| Gm10031   | 8,6E-08  | -0,09388 | 0,061 | 0,167 | 0,001356 |
| Rcn2      | 8,66E-08 | -0,12741 | 0,325 | 0,511 | 0,001366 |
| Ccdc191   | 8,84E-08 | -0,1189  | 0,178 | 0,331 | 0,001395 |
| Bckdhb    | 9,01E-08 | -0,11996 | 0,182 | 0,331 | 0,001422 |
| Syngn2    | 9,18E-08 | -0,14068 | 0,424 | 0,614 | 0,001448 |
| 4833420G  | 9,27E-08 | -0,12894 | 0,261 | 0,441 | 0,001462 |
| H2-Ke6    | 9,3E-08  | -0,13958 | 0,301 | 0,479 | 0,001467 |
| Araf      | 9,4E-08  | -0,15883 | 0,629 | 0,789 | 0,001484 |
| Fancf     | 9,54E-08 | -0,11582 | 0,141 | 0,281 | 0,001505 |
| Ppp1cc    | 9,65E-08 | -0,18477 | 0,673 | 0,781 | 0,001522 |
| Nkx2-9    | 9,74E-08 | -0,32877 | 0,16  | 0,289 | 0,001537 |
| Rtn1      | 9,75E-08 | -0,06364 | 0,004 | 0,061 | 0,001538 |
| E2f3      | 9,77E-08 | -0,08263 | 0,026 | 0,108 | 0,001541 |
| Mn1       | 9,77E-08 | -0,12169 | 0,163 | 0,308 | 0,001541 |
| Rab2b     | 9,87E-08 | -0,15531 | 0,321 | 0,5   | 0,001557 |
| Rab3ip    | 9,87E-08 | -0,11509 | 0,112 | 0,241 | 0,001557 |
| 9330182LC | 9,97E-08 | -0,17258 | 0,4   | 0,578 | 0,001572 |
| Bbip1     | 9,98E-08 | -0,16747 | 0,552 | 0,715 | 0,001574 |
| Arglu1    | 1,02E-07 | -0,14083 | 0,916 | 0,958 | 0,00161  |
| Bad       | 1,02E-07 | -0,11519 | 0,169 | 0,314 | 0,001614 |
| Cry1      | 1,03E-07 | -0,10493 | 0,141 | 0,283 | 0,001619 |
| 2610001JC | 1,04E-07 | -0,16822 | 0,587 | 0,738 | 0,001639 |
| Nhlrc1    | 1,04E-07 | -0,13459 | 0,095 | 0,213 | 0,00164  |
| Trmt10a   | 1,04E-07 | -0,10167 | 0,156 | 0,306 | 0,001646 |
| Mrps23    | 1,04E-07 | -0,12898 | 0,292 | 0,462 | 0,001648 |

|           |          |          |       |       |          |
|-----------|----------|----------|-------|-------|----------|
| Tmem181a  | 1,05E-07 | -0,14085 | 0,275 | 0,451 | 0,001662 |
| Sra1      | 1,05E-07 | -0,16837 | 0,556 | 0,705 | 0,001664 |
| Ier5      | 1,05E-07 | 0,161202 | 0,134 | 0,04  | 0,001664 |
| Tmem250-1 | 1,1E-07  | -0,13281 | 0,261 | 0,43  | 0,001728 |
| Lgals8    | 1,1E-07  | -0,13003 | 0,356 | 0,538 | 0,00173  |
| Ufl1      | 1,11E-07 | -0,14063 | 0,433 | 0,627 | 0,001744 |
| Apc       | 1,11E-07 | 0,201649 | 0,963 | 0,939 | 0,001746 |
| Clip2     | 1,14E-07 | 0,220379 | 0,761 | 0,673 | 0,001799 |
| Anapc16   | 1,14E-07 | -0,1562  | 0,628 | 0,795 | 0,001803 |
| Lgr4      | 1,15E-07 | -0,11343 | 0,105 | 0,23  | 0,001815 |
| Timm9     | 1,15E-07 | -0,12654 | 0,29  | 0,464 | 0,001819 |
| Xxylt1    | 1,16E-07 | -0,12393 | 0,143 | 0,281 | 0,001824 |
| Ramp1     | 1,16E-07 | -0,06196 | 0,006 | 0,065 | 0,001832 |
| Nadk2     | 1,16E-07 | -0,14346 | 0,288 | 0,46  | 0,001835 |
| Tcaim     | 1,16E-07 | -0,1195  | 0,152 | 0,295 | 0,001836 |
| Trim7     | 1,16E-07 | -0,1212  | 0,088 | 0,205 | 0,001838 |
| Prdx2     | 1,17E-07 | -0,16378 | 0,822 | 0,884 | 0,001851 |
| Arfgap3   | 1,17E-07 | -0,13035 | 0,259 | 0,426 | 0,001851 |
| Coq8a     | 1,18E-07 | -0,10835 | 0,11  | 0,238 | 0,001858 |
| Mat2b     | 1,18E-07 | -0,12958 | 0,426 | 0,599 | 0,001865 |
| Cpa2      | 1,18E-07 | -0,09274 | 0,062 | 0,169 | 0,001868 |
| Samhd1    | 1,23E-07 | 0,238016 | 0,451 | 0,319 | 0,001942 |
| Rad23a    | 1,23E-07 | -0,16245 | 0,578 | 0,749 | 0,001946 |
| Snrpe     | 1,25E-07 | -0,1386  | 0,517 | 0,694 | 0,001966 |
| Acsf2     | 1,26E-07 | -0,09986 | 0,035 | 0,122 | 0,001982 |
| Sars      | 1,27E-07 | -0,18995 | 0,789 | 0,863 | 0,002002 |
| Setd5     | 1,27E-07 | 0,236532 | 0,71  | 0,599 | 0,002009 |
| Jund      | 1,29E-07 | 0,285498 | 1     | 0,998 | 0,002028 |
| Alg6      | 1,29E-07 | -0,12526 | 0,13  | 0,264 | 0,002035 |
| Smarcd3   | 1,29E-07 | -0,10695 | 0,11  | 0,236 | 0,002041 |
| Pank3     | 1,31E-07 | 0,247285 | 0,596 | 0,494 | 0,002069 |
| Nfx1      | 1,32E-07 | -0,13462 | 0,316 | 0,5   | 0,002079 |
| Arhgef2   | 1,32E-07 | 0,202379 | 0,952 | 0,914 | 0,002084 |
| Tmed4     | 1,33E-07 | -0,13428 | 0,677 | 0,854 | 0,002099 |
| Zfp580    | 1,33E-07 | -0,12781 | 0,193 | 0,338 | 0,0021   |
| Arpc1b    | 1,33E-07 | 0,237833 | 0,703 | 0,589 | 0,002106 |
| Hipk2     | 1,34E-07 | 0,178787 | 0,956 | 0,943 | 0,002113 |
| Aamdc     | 1,35E-07 | -0,17844 | 0,67  | 0,783 | 0,002131 |
| Nfia      | 1,35E-07 | 0,209394 | 0,927 | 0,863 | 0,002133 |
| Pnlsr     | 1,38E-07 | -0,11485 | 0,943 | 0,977 | 0,002176 |
| Cnih4     | 1,41E-07 | -0,14367 | 0,457 | 0,646 | 0,002226 |
| Caap1     | 1,42E-07 | -0,11978 | 0,171 | 0,316 | 0,002235 |
| Ubb       | 1,43E-07 | -0,12202 | 1     | 0,998 | 0,002256 |
| Arpc5l    | 1,45E-07 | -0,14635 | 0,534 | 0,703 | 0,00229  |
| Tmed2     | 1,46E-07 | -0,14103 | 0,947 | 0,956 | 0,002304 |
| Srsf2     | 1,47E-07 | 0,20207  | 0,974 | 0,964 | 0,002323 |
| Sec61b    | 1,5E-07  | -0,14257 | 0,525 | 0,679 | 0,002364 |
| Specc1    | 1,5E-07  | -0,1734  | 0,793 | 0,871 | 0,002365 |
| Pde4d     | 1,5E-07  | -0,12832 | 0,112 | 0,236 | 0,002371 |
| Sptan1    | 1,51E-07 | 0,261916 | 0,547 | 0,437 | 0,002386 |
| H2afx     | 1,52E-07 | -0,13208 | 0,171 | 0,314 | 0,002395 |
| Zfp758    | 1,53E-07 | -0,10131 | 0,062 | 0,167 | 0,002419 |

|           |          |          |       |       |          |
|-----------|----------|----------|-------|-------|----------|
| Parl      | 1,54E-07 | -0,13958 | 0,433 | 0,62  | 0,002429 |
| Tmem110   | 1,56E-07 | -0,12757 | 0,29  | 0,46  | 0,002458 |
| Abhd4     | 1,58E-07 | -0,15682 | 0,606 | 0,768 | 0,002486 |
| Zfp101    | 1,58E-07 | -0,15111 | 0,297 | 0,458 | 0,00249  |
| Ptcd2     | 1,58E-07 | -0,12589 | 0,171 | 0,314 | 0,002494 |
| Haghl     | 1,58E-07 | -0,12435 | 0,561 | 0,751 | 0,002499 |
| Acad11    | 1,59E-07 | -0,11489 | 0,099 | 0,219 | 0,002509 |
| Yif1a     | 1,59E-07 | -0,15191 | 0,484 | 0,658 | 0,002514 |
| Mlh3      | 1,61E-07 | -0,12968 | 0,305 | 0,483 | 0,002535 |
| Lrrc28    | 1,61E-07 | -0,12107 | 0,31  | 0,487 | 0,002541 |
| Pgls      | 1,61E-07 | -0,13845 | 0,396 | 0,576 | 0,002541 |
| Cyb5r3    | 1,61E-07 | 0,215822 | 0,38  | 0,247 | 0,002543 |
| Gstk1     | 1,64E-07 | -0,13958 | 0,226 | 0,378 | 0,002584 |
| Commd3    | 1,64E-07 | -0,15769 | 0,62  | 0,776 | 0,002593 |
| Nudt5     | 1,65E-07 | -0,12492 | 0,251 | 0,42  | 0,002597 |
| Rnaseh2b  | 1,65E-07 | -0,11843 | 0,174 | 0,321 | 0,002602 |
| Mrps7     | 1,66E-07 | -0,13655 | 0,503 | 0,677 | 0,002625 |
| Ndufaf8   | 1,68E-07 | -0,13591 | 0,321 | 0,504 | 0,00265  |
| Gng5      | 1,68E-07 | -0,15152 | 0,892 | 0,911 | 0,002651 |
| Samm50    | 1,69E-07 | -0,13408 | 0,42  | 0,618 | 0,00267  |
| Hmgcl     | 1,7E-07  | -0,14424 | 0,569 | 0,726 | 0,002675 |
| Ppp1r11   | 1,7E-07  | -0,14159 | 0,508 | 0,679 | 0,002679 |
| Mta1      | 1,7E-07  | -0,12519 | 0,222 | 0,378 | 0,002686 |
| Psd3      | 1,7E-07  | -0,11111 | 0,411 | 0,601 | 0,002689 |
| Nsmce4a   | 1,71E-07 | -0,14826 | 0,543 | 0,711 | 0,002691 |
| Zfp560    | 1,71E-07 | -0,12206 | 0,202 | 0,357 | 0,002705 |
| Apba2     | 1,76E-07 | 0,149548 | 0,178 | 0,07  | 0,002775 |
| Plekhg1   | 1,76E-07 | 0,252485 | 0,822 | 0,787 | 0,00278  |
| 1110019D  | 1,77E-07 | -0,09609 | 0,029 | 0,112 | 0,002788 |
| Thumpd1   | 1,77E-07 | -0,13606 | 0,35  | 0,525 | 0,002794 |
| Snx32     | 1,77E-07 | -0,13958 | 0,514 | 0,698 | 0,002799 |
| 1110008F1 | 1,77E-07 | -0,13772 | 0,55  | 0,738 | 0,0028   |
| Grm3      | 1,78E-07 | -0,16998 | 0,481 | 0,652 | 0,002813 |
| Mrpl28    | 1,79E-07 | -0,12299 | 0,444 | 0,62  | 0,002818 |
| Ganc      | 1,79E-07 | -0,12803 | 0,196 | 0,344 | 0,002824 |
| Ddx1      | 1,79E-07 | -0,1571  | 0,778 | 0,888 | 0,002827 |
| Scnm1     | 1,8E-07  | -0,13529 | 0,451 | 0,639 | 0,002837 |
| Mphosph6  | 1,82E-07 | -0,10976 | 0,334 | 0,523 | 0,002867 |
| Meaf6     | 1,82E-07 | -0,152   | 0,4   | 0,578 | 0,00287  |
| Ccpg1os   | 1,82E-07 | -0,10104 | 0,062 | 0,165 | 0,002873 |
| Tmem222   | 1,82E-07 | -0,13133 | 0,391 | 0,58  | 0,002878 |
| Kmt2a     | 1,83E-07 | 0,249856 | 0,725 | 0,662 | 0,002884 |
| Smox      | 1,84E-07 | -0,11785 | 0,281 | 0,46  | 0,0029   |
| Rpp21     | 1,86E-07 | -0,13713 | 0,338 | 0,517 | 0,002939 |
| Wdr18     | 1,88E-07 | -0,11827 | 0,268 | 0,437 | 0,00296  |
| Csad      | 1,88E-07 | -0,14405 | 0,174 | 0,316 | 0,002967 |
| Smco3     | 1,92E-07 | -0,19191 | 0,503 | 0,637 | 0,003027 |
| Dram2     | 1,92E-07 | -0,14432 | 0,363 | 0,544 | 0,003031 |
| Fkbp3     | 1,93E-07 | -0,15514 | 0,58  | 0,728 | 0,003042 |
| Dld       | 1,93E-07 | -0,12114 | 0,4   | 0,586 | 0,003046 |
| Tmem135   | 1,93E-07 | -0,13143 | 0,255 | 0,424 | 0,003049 |
| Senp8     | 1,96E-07 | -0,12227 | 0,136 | 0,268 | 0,003091 |

|           |          |          |       |       |          |
|-----------|----------|----------|-------|-------|----------|
| Hoxd3os1  | 1,98E-07 | -0,1408  | 0,303 | 0,487 | 0,003117 |
| Bcar1     | 1,99E-07 | 0,236487 | 0,723 | 0,633 | 0,003136 |
| Rnf5      | 2,02E-07 | -0,15821 | 0,798 | 0,886 | 0,003192 |
| Dnajc30   | 2,07E-07 | -0,14093 | 0,273 | 0,43  | 0,003271 |
| Srp9      | 2,15E-07 | -0,16972 | 0,651 | 0,791 | 0,003387 |
| 1110004F1 | 2,16E-07 | -0,14296 | 0,787 | 0,88  | 0,003408 |
| Dcxr      | 2,2E-07  | -0,11899 | 0,139 | 0,272 | 0,003463 |
| Yae1d1    | 2,2E-07  | -0,10433 | 0,394 | 0,593 | 0,003471 |
| Ndufs2    | 2,2E-07  | -0,13296 | 0,813 | 0,899 | 0,003475 |
| Maob      | 2,21E-07 | -0,114   | 0,079 | 0,188 | 0,00349  |
| Vps4a     | 2,22E-07 | -0,13451 | 0,499 | 0,688 | 0,003497 |
| Dtd1      | 2,25E-07 | -0,13846 | 0,389 | 0,572 | 0,003544 |
| Glrx5     | 2,25E-07 | -0,12869 | 0,35  | 0,54  | 0,003545 |
| Ufm1      | 2,25E-07 | -0,13184 | 0,422 | 0,616 | 0,003555 |
| Spq7      | 2,29E-07 | -0,12654 | 0,288 | 0,456 | 0,003619 |
| Uckl1     | 2,31E-07 | -0,13823 | 0,264 | 0,424 | 0,003648 |
| Mapt      | 2,32E-07 | 0,157515 | 1     | 0,998 | 0,003661 |
| Rsl24d1   | 2,34E-07 | -0,13958 | 0,393 | 0,568 | 0,003699 |
| Anapc13   | 2,37E-07 | -0,15713 | 0,639 | 0,781 | 0,003737 |
| Gm44421   | 2,39E-07 | -0,08717 | 0,039 | 0,127 | 0,003764 |
| Srp68     | 2,39E-07 | -0,11108 | 0,295 | 0,47  | 0,003769 |
| Tnfaip6   | 2,5E-07  | -0,12671 | 0,936 | 0,943 | 0,003944 |
| Serp1     | 2,51E-07 | -0,16961 | 0,497 | 0,658 | 0,003961 |
| Trim36    | 2,51E-07 | -0,15291 | 0,369 | 0,553 | 0,003963 |
| 4930430FC | 2,51E-07 | -0,13836 | 0,323 | 0,504 | 0,003965 |
| Pdcd6     | 2,53E-07 | -0,14823 | 0,613 | 0,759 | 0,003997 |
| Oxld1     | 2,56E-07 | -0,09165 | 0,053 | 0,15  | 0,004035 |
| Rer1      | 2,57E-07 | -0,14429 | 0,873 | 0,916 | 0,004057 |
| Psmd10    | 2,58E-07 | -0,11865 | 0,185 | 0,333 | 0,004068 |
| Chrac1    | 2,58E-07 | -0,12992 | 0,235 | 0,399 | 0,004069 |
| Bcap29    | 2,6E-07  | -0,12731 | 0,24  | 0,401 | 0,004102 |
| H3f3b     | 2,61E-07 | 0,2126   | 1     | 0,996 | 0,004125 |
| Hsdl2     | 2,62E-07 | -0,12113 | 0,27  | 0,445 | 0,004128 |
| Rps7      | 2,63E-07 | -0,11685 | 0,982 | 0,983 | 0,004155 |
| D10Jhu81e | 2,64E-07 | -0,13462 | 0,338 | 0,513 | 0,004167 |
| Cmtm3     | 2,66E-07 | 0,156687 | 0,193 | 0,082 | 0,004195 |
| Fdx1      | 2,7E-07  | -0,12808 | 0,218 | 0,371 | 0,004252 |
| Cox19     | 2,71E-07 | -0,11291 | 0,299 | 0,479 | 0,004275 |
| Ndufs3    | 2,71E-07 | -0,15464 | 0,567 | 0,732 | 0,004277 |
| Stx18     | 2,72E-07 | -0,12883 | 0,273 | 0,441 | 0,004292 |
| Actl6a    | 2,73E-07 | -0,11081 | 0,328 | 0,511 | 0,004301 |
| Rnf138    | 2,74E-07 | -0,11214 | 0,259 | 0,424 | 0,004322 |
| Adgrg1    | 2,77E-07 | 0,180835 | 0,233 | 0,112 | 0,004371 |
| Akirin2   | 2,79E-07 | -0,14578 | 0,589 | 0,762 | 0,004397 |
| Ift57     | 2,79E-07 | -0,12405 | 0,156 | 0,291 | 0,004401 |
| Pecr      | 2,86E-07 | -0,09649 | 0,156 | 0,3   | 0,004504 |
| Gpi1      | 2,88E-07 | -0,15446 | 0,87  | 0,914 | 0,004538 |
| Tab1      | 2,88E-07 | -0,11474 | 0,196 | 0,35  | 0,004539 |
| Ankrd49   | 2,91E-07 | -0,11144 | 0,279 | 0,454 | 0,004597 |
| Cenpq     | 2,92E-07 | -0,10425 | 0,092 | 0,207 | 0,004605 |
| Slc24a5   | 2,93E-07 | -0,10082 | 0,347 | 0,534 | 0,004628 |
| Trappc3   | 2,94E-07 | -0,13958 | 0,538 | 0,694 | 0,004631 |

|           |          |          |       |       |          |
|-----------|----------|----------|-------|-------|----------|
| Timmdc1   | 2,94E-07 | -0,10357 | 0,121 | 0,247 | 0,004636 |
| Ube2q2    | 2,95E-07 | -0,12444 | 0,259 | 0,418 | 0,004659 |
| Uxs1      | 2,99E-07 | -0,12468 | 0,185 | 0,329 | 0,004722 |
| Tmem33    | 3E-07    | -0,13838 | 0,862 | 0,928 | 0,004725 |
| Cuta      | 3E-07    | -0,13752 | 0,78  | 0,88  | 0,004733 |
| Hnrnpa0   | 3,02E-07 | 0,186219 | 0,877 | 0,861 | 0,004767 |
| Fam161b   | 3,03E-07 | -0,10127 | 0,09  | 0,205 | 0,004786 |
| Tiprl     | 3,05E-07 | -0,12364 | 0,352 | 0,534 | 0,004809 |
| Zfp979    | 3,06E-07 | -0,07651 | 0,055 | 0,154 | 0,004826 |
| Sez6l2    | 3,07E-07 | -0,1343  | 0,954 | 0,981 | 0,004842 |
| Saraf     | 3,08E-07 | -0,13129 | 0,972 | 0,968 | 0,004862 |
| Zfp950    | 3,09E-07 | -0,12975 | 0,338 | 0,519 | 0,00488  |
| Zfp87     | 3,12E-07 | -0,11476 | 0,108 | 0,228 | 0,004918 |
| Lsm2      | 3,12E-07 | -0,12793 | 0,202 | 0,346 | 0,00493  |
| Pter      | 3,13E-07 | -0,10813 | 0,136 | 0,268 | 0,004934 |
| Laptm4b   | 3,16E-07 | -0,15791 | 0,725 | 0,857 | 0,004978 |
| Ahsa2     | 3,18E-07 | -0,14314 | 0,358 | 0,525 | 0,005016 |
| Fgl2      | 3,21E-07 | 0,276801 | 0,083 | 0,013 | 0,005057 |
| Ndufa12   | 3,21E-07 | -0,15278 | 0,662 | 0,789 | 0,005071 |
| Selenos   | 3,23E-07 | -0,16325 | 0,897 | 0,939 | 0,00509  |
| Rsu1      | 3,32E-07 | -0,14186 | 0,716 | 0,844 | 0,005231 |
| Ift43     | 3,32E-07 | -0,16563 | 0,512 | 0,688 | 0,005232 |
| Gm44386   | 3,42E-07 | -0,09282 | 0,064 | 0,167 | 0,005391 |
| Zmiz1     | 3,42E-07 | 0,267384 | 0,633 | 0,58  | 0,005401 |
| Glrx3     | 3,44E-07 | -0,16086 | 0,655 | 0,772 | 0,00542  |
| Dnm3      | 3,54E-07 | -0,151   | 0,945 | 0,979 | 0,005583 |
| Coq5      | 3,6E-07  | -0,106   | 0,272 | 0,445 | 0,005685 |
| Cdc42ep2  | 3,61E-07 | -0,15098 | 0,949 | 0,979 | 0,005687 |
| Srsf3     | 3,62E-07 | 0,193775 | 0,965 | 0,92  | 0,005716 |
| Rassf2    | 3,63E-07 | 0,18144  | 0,91  | 0,886 | 0,005719 |
| Matr3     | 3,63E-07 | 0,184991 | 0,965 | 0,935 | 0,005723 |
| Clk1      | 3,65E-07 | 0,196742 | 0,93  | 0,905 | 0,005755 |
| AC133505. | 3,66E-07 | -0,06825 | 0,011 | 0,074 | 0,005774 |
| Cdan1     | 3,68E-07 | -0,11616 | 0,156 | 0,291 | 0,005813 |
| Cyb5b     | 3,7E-07  | -0,12619 | 0,332 | 0,506 | 0,00584  |
| Rint1     | 3,73E-07 | -0,11495 | 0,279 | 0,454 | 0,005887 |
| Psmid9    | 3,74E-07 | -0,12176 | 0,422 | 0,616 | 0,005893 |
| Ubald2    | 3,79E-07 | -0,10867 | 0,418 | 0,612 | 0,005978 |
| Lzts2     | 3,8E-07  | 0,177107 | 0,967 | 0,947 | 0,005999 |
| Bche      | 3,8E-07  | -0,11412 | 0,215 | 0,367 | 0,006001 |
| Dhdds     | 3,84E-07 | -0,13023 | 0,283 | 0,443 | 0,006062 |
| Fmc1      | 3,85E-07 | -0,13468 | 0,521 | 0,703 | 0,00607  |
| Eif2s1    | 3,85E-07 | -0,11062 | 0,383 | 0,582 | 0,006077 |
| Ccdc85b   | 3,86E-07 | -0,13741 | 0,442 | 0,635 | 0,006087 |
| A330049N  | 3,88E-07 | -0,14233 | 0,228 | 0,378 | 0,006117 |
| Mtx1      | 3,89E-07 | -0,12664 | 0,224 | 0,378 | 0,00613  |
| March2    | 3,9E-07  | -0,13675 | 0,56  | 0,736 | 0,006148 |
| Ppp1r10   | 3,94E-07 | 0,37892  | 0,561 | 0,479 | 0,006217 |
| Dync1h1   | 3,97E-07 | 0,193866 | 0,974 | 0,941 | 0,006259 |
| Gm26890   | 3,97E-07 | -0,14328 | 0,294 | 0,46  | 0,006265 |
| Got1      | 3,98E-07 | -0,13958 | 0,319 | 0,481 | 0,006274 |
| Ttc12     | 4,08E-07 | -0,09274 | 0,066 | 0,169 | 0,00644  |



|          |          |          |       |       |          |
|----------|----------|----------|-------|-------|----------|
| Arpc1a   | 4,1E-07  | -0,17951 | 0,974 | 0,985 | 0,006475 |
| Mrpl13   | 4,12E-07 | -0,14317 | 0,354 | 0,523 | 0,0065   |
| Cyb5d2   | 4,12E-07 | -0,14105 | 0,191 | 0,331 | 0,0065   |
| Rad51d   | 4,13E-07 | -0,1286  | 0,147 | 0,276 | 0,006517 |
| Gpd2     | 4,24E-07 | -0,23032 | 0,433 | 0,57  | 0,006691 |
| Fhit     | 4,24E-07 | -0,08875 | 0,037 | 0,12  | 0,006692 |
| Mrpl16   | 4,24E-07 | -0,09187 | 0,139 | 0,272 | 0,006692 |
| Coq10a   | 4,29E-07 | -0,13048 | 0,303 | 0,466 | 0,006771 |
| Gclc     | 4,34E-07 | -0,13008 | 0,347 | 0,517 | 0,006848 |
| Tubb2b   | 4,35E-07 | -0,45088 | 0,094 | 0,207 | 0,00686  |
| Trpm7    | 4,35E-07 | 0,218388 | 0,694 | 0,61  | 0,006861 |
| Taf6l    | 4,38E-07 | -0,11001 | 0,268 | 0,435 | 0,006917 |
| Ppm1m    | 4,47E-07 | -0,11059 | 0,084 | 0,192 | 0,00705  |
| Rnase4   | 4,47E-07 | 0,205769 | 0,196 | 0,084 | 0,007052 |
| H2afj    | 4,47E-07 | -0,15518 | 0,934 | 0,977 | 0,007053 |
| Nfu1     | 4,51E-07 | -0,12377 | 0,29  | 0,449 | 0,007108 |
| Ptpra    | 4,51E-07 | -0,12557 | 0,947 | 0,964 | 0,007112 |
| Ndufb2   | 4,57E-07 | -0,15446 | 0,824 | 0,892 | 0,007204 |
| Polr2h   | 4,61E-07 | -0,09684 | 0,222 | 0,384 | 0,007275 |
| Faim     | 4,68E-07 | -0,15028 | 0,532 | 0,696 | 0,007376 |
| Sem1     | 4,68E-07 | -0,13622 | 0,886 | 0,939 | 0,007387 |
| Ktn1     | 4,71E-07 | -0,12548 | 0,989 | 0,996 | 0,007435 |
| Gal3st1  | 4,75E-07 | -0,18899 | 0,936 | 0,964 | 0,00749  |
| Rtraf    | 4,78E-07 | -0,16511 | 0,745 | 0,859 | 0,007534 |
| Nat9     | 4,81E-07 | -0,12482 | 0,279 | 0,441 | 0,007589 |
| Mut      | 4,88E-07 | -0,16267 | 0,361 | 0,527 | 0,007693 |
| Tor1a    | 4,92E-07 | -0,10609 | 0,294 | 0,46  | 0,007754 |
| Slc6a6   | 4,98E-07 | 0,206962 | 0,945 | 0,935 | 0,007851 |
| Nkx6-2   | 4,98E-07 | -0,13188 | 0,983 | 0,994 | 0,007859 |
| Mff      | 5,08E-07 | -0,13578 | 0,703 | 0,827 | 0,008016 |
| Pgp      | 5,09E-07 | -0,14302 | 0,883 | 0,909 | 0,008038 |
| Zc3h6    | 5,2E-07  | -0,10939 | 0,117 | 0,243 | 0,008198 |
| Abhd5    | 5,21E-07 | -0,14141 | 0,547 | 0,715 | 0,008226 |
| Uros     | 5,21E-07 | -0,08786 | 0,099 | 0,215 | 0,008226 |
| Erg28    | 5,22E-07 | -0,13619 | 0,594 | 0,745 | 0,008242 |
| Fan1     | 5,23E-07 | -0,11757 | 0,141 | 0,27  | 0,008251 |
| Zfp428   | 5,24E-07 | -0,07347 | 0,064 | 0,167 | 0,008272 |
| Mrpl2    | 5,26E-07 | -0,11218 | 0,268 | 0,43  | 0,008293 |
| Rab39b   | 5,26E-07 | -0,10458 | 0,295 | 0,468 | 0,008293 |
| Vapa     | 5,28E-07 | -0,11928 | 0,954 | 0,96  | 0,008324 |
| Etfb     | 5,28E-07 | -0,14546 | 0,543 | 0,696 | 0,008327 |
| Zfp141   | 5,29E-07 | -0,08089 | 0,05  | 0,141 | 0,008353 |
| Tprgl    | 5,3E-07  | -0,14309 | 0,855 | 0,924 | 0,008358 |
| Fopnl    | 5,31E-07 | -0,1249  | 0,422 | 0,599 | 0,008381 |
| Alkbh1   | 5,37E-07 | -0,13086 | 0,211 | 0,357 | 0,00847  |
| Lpin1    | 5,38E-07 | 0,291942 | 0,499 | 0,399 | 0,00848  |
| Ripk1    | 5,39E-07 | 0,197686 | 0,231 | 0,118 | 0,008501 |
| Fam53a   | 5,4E-07  | -0,125   | 0,218 | 0,363 | 0,008524 |
| Ahcyl1   | 5,48E-07 | -0,13047 | 0,754 | 0,876 | 0,008643 |
| Gstp2    | 5,48E-07 | 0,184965 | 0,138 | 0,046 | 0,008646 |
| Cyb561d2 | 5,5E-07  | -0,10459 | 0,235 | 0,395 | 0,00868  |
| Erp44    | 5,51E-07 | -0,11749 | 0,352 | 0,527 | 0,008685 |

|           |          |          |       |       |          |
|-----------|----------|----------|-------|-------|----------|
| Cep104    | 5,54E-07 | -0,10416 | 0,283 | 0,447 | 0,008733 |
| B430010I2 | 5,55E-07 | -0,08409 | 0,187 | 0,333 | 0,008763 |
| Sqor      | 5,59E-07 | -0,07575 | 0,029 | 0,108 | 0,008818 |
| C1qbp     | 5,64E-07 | -0,14929 | 0,528 | 0,675 | 0,008895 |
| Zfp511    | 5,66E-07 | -0,1095  | 0,167 | 0,308 | 0,00893  |
| Pdia4     | 5,67E-07 | -0,15194 | 0,527 | 0,69  | 0,008948 |
| Cep290    | 5,69E-07 | -0,11975 | 0,207 | 0,367 | 0,008974 |
| Tsr3      | 5,7E-07  | -0,12102 | 0,228 | 0,378 | 0,008996 |
| Srsf5     | 5,87E-07 | 0,180029 | 0,98  | 0,966 | 0,009268 |
| Scd2      | 5,93E-07 | -0,14603 | 1     | 0,998 | 0,009348 |
| Tmem70    | 5,96E-07 | -0,12061 | 0,215 | 0,361 | 0,009409 |
| Gm26917   | 5,98E-07 | 0,260633 | 0,543 | 0,441 | 0,009434 |
| Uchl5     | 6E-07    | -0,13227 | 0,209 | 0,35  | 0,009463 |
| Trmt6     | 6,04E-07 | -0,1125  | 0,264 | 0,435 | 0,00953  |
| Olfr671   | 6,09E-07 | -0,10859 | 0,062 | 0,16  | 0,009606 |
| Fam171a1  | 6,09E-07 | -0,1301  | 0,246 | 0,403 | 0,009615 |
| Ext2      | 6,11E-07 | -0,11335 | 0,262 | 0,418 | 0,009642 |
| Chmp5     | 6,12E-07 | -0,14078 | 0,84  | 0,905 | 0,009661 |
| Vdac3     | 6,13E-07 | -0,14611 | 0,82  | 0,903 | 0,009668 |
| Mtmr2     | 6,16E-07 | 0,209294 | 0,809 | 0,751 | 0,009719 |
| Tssc4     | 6,17E-07 | -0,08676 | 0,257 | 0,422 | 0,00973  |
| Manbal    | 6,17E-07 | -0,13019 | 0,472 | 0,641 | 0,009736 |
| Pdcd10    | 6,26E-07 | -0,13447 | 0,756 | 0,859 | 0,009873 |
| Sass6     | 6,29E-07 | -0,13066 | 0,27  | 0,432 | 0,009925 |
| Mcts2     | 6,36E-07 | -0,09543 | 0,088 | 0,198 | 0,010036 |
| Actr6     | 6,38E-07 | -0,10931 | 0,235 | 0,395 | 0,010067 |
| Sdhd      | 6,45E-07 | -0,12051 | 0,367 | 0,546 | 0,010178 |
| Hsd17b11  | 6,53E-07 | -0,16207 | 0,554 | 0,707 | 0,010296 |
| 1110012L1 | 6,54E-07 | -0,09298 | 0,134 | 0,264 | 0,010313 |
| Rpl6      | 6,55E-07 | -0,11632 | 0,996 | 0,996 | 0,010332 |
| Psmc14    | 6,59E-07 | -0,1231  | 0,461 | 0,648 | 0,010402 |
| Zfp771    | 6,61E-07 | -0,19496 | 0,728 | 0,819 | 0,01043  |
| Mgst3     | 6,64E-07 | -0,47858 | 0,455 | 0,563 | 0,01047  |
| Tyw3      | 6,74E-07 | -0,07563 | 0,035 | 0,116 | 0,01064  |
| Rnf157    | 6,81E-07 | -0,12185 | 0,121 | 0,241 | 0,010745 |
| BC017643  | 6,87E-07 | -0,12633 | 0,213 | 0,354 | 0,010836 |
| Praf2     | 6,96E-07 | -0,11545 | 0,407 | 0,601 | 0,010987 |
| Tac2      | 6,97E-07 | -0,04537 | 0     | 0,044 | 0,010989 |
| Trim59    | 6,98E-07 | 0,211458 | 0,978 | 0,964 | 0,011006 |
| Gnpda2    | 7,03E-07 | -0,13094 | 0,321 | 0,487 | 0,011098 |
| Hmgn5     | 7,05E-07 | -0,11616 | 0,141 | 0,268 | 0,011125 |
| Poc1a     | 7,08E-07 | 0,259329 | 0,514 | 0,407 | 0,011169 |
| Mvb12a    | 7,13E-07 | -0,1501  | 0,391 | 0,555 | 0,011248 |
| Gm20515   | 7,14E-07 | -0,09322 | 0,044 | 0,131 | 0,011268 |
| Edem2     | 7,15E-07 | -0,13032 | 0,497 | 0,667 | 0,011287 |
| Cpne2     | 7,2E-07  | -0,0754  | 0,028 | 0,103 | 0,01136  |
| Hist1h4h  | 7,26E-07 | -0,15013 | 0,143 | 0,266 | 0,011457 |
| Tst       | 7,27E-07 | -0,14079 | 0,321 | 0,481 | 0,01147  |
| Meg3      | 7,28E-07 | -0,05025 | 0,006 | 0,059 | 0,011481 |
| Strn      | 7,28E-07 | -0,14417 | 0,633 | 0,781 | 0,011483 |
| Ndufv3    | 7,34E-07 | -0,14178 | 0,743 | 0,85  | 0,011578 |
| Gm39469   | 7,34E-07 | -0,10098 | 0,055 | 0,148 | 0,011581 |

|           |          |          |       |       |          |
|-----------|----------|----------|-------|-------|----------|
| Gid8      | 7,38E-07 | -0,09226 | 0,228 | 0,382 | 0,01164  |
| Tmem219   | 7,42E-07 | -0,11818 | 0,308 | 0,483 | 0,011705 |
| 2310039H  | 7,58E-07 | -0,10529 | 0,114 | 0,232 | 0,011953 |
| Tsacc     | 7,61E-07 | -0,07469 | 0,042 | 0,129 | 0,012005 |
| Dusp8     | 7,64E-07 | -0,10907 | 0,325 | 0,5   | 0,012048 |
| Wnt3      | 7,66E-07 | -0,12079 | 0,286 | 0,451 | 0,012087 |
| Btc       | 7,82E-07 | -0,0683  | 0,075 | 0,179 | 0,01234  |
| Trap1     | 7,86E-07 | -0,11799 | 0,27  | 0,42  | 0,012397 |
| Zmat5     | 7,88E-07 | -0,11739 | 0,47  | 0,648 | 0,012426 |
| 1110038F1 | 7,89E-07 | -0,1107  | 0,327 | 0,502 | 0,012442 |
| Tctex1d2  | 7,96E-07 | -0,10471 | 0,138 | 0,266 | 0,012563 |
| Ranbp9    | 7,99E-07 | -0,13042 | 0,284 | 0,439 | 0,0126   |
| Mrps26    | 8,02E-07 | -0,1462  | 0,429 | 0,586 | 0,012653 |
| Scly      | 8,02E-07 | -0,13958 | 0,257 | 0,405 | 0,012653 |
| Prelid1   | 8,05E-07 | -0,1439  | 0,446 | 0,62  | 0,012706 |
| Gpatch11  | 8,09E-07 | -0,10085 | 0,316 | 0,5   | 0,012763 |
| Srsf6     | 8,09E-07 | 0,182679 | 0,734 | 0,662 | 0,012765 |
| Synj2     | 8,17E-07 | -0,12334 | 0,407 | 0,591 | 0,012896 |
| Prickle1  | 8,2E-07  | 0,331182 | 0,508 | 0,401 | 0,01293  |
| Fam213a   | 8,28E-07 | -0,16943 | 0,598 | 0,736 | 0,013062 |
| Upp2      | 8,33E-07 | -0,10443 | 0,103 | 0,215 | 0,013139 |
| Gstz1     | 8,33E-07 | -0,12731 | 0,261 | 0,414 | 0,013144 |
| Rps27l    | 8,35E-07 | -0,11603 | 0,697 | 0,812 | 0,013169 |
| Agk       | 8,35E-07 | -0,08534 | 0,152 | 0,287 | 0,013178 |
| Mkln1     | 8,43E-07 | 0,217371 | 0,754 | 0,703 | 0,013295 |
| Gm5914    | 8,48E-07 | -0,08619 | 0,05  | 0,139 | 0,013383 |
| Slc35a5   | 8,66E-07 | -0,14562 | 0,598 | 0,757 | 0,013664 |
| B230209E1 | 8,67E-07 | -0,10043 | 0,037 | 0,118 | 0,013673 |
| Tbck      | 8,8E-07  | -0,11108 | 0,29  | 0,458 | 0,013891 |
| Tmem205   | 8,81E-07 | -0,14561 | 0,611 | 0,751 | 0,013901 |
| Nptxr     | 8,87E-07 | 0,079372 | 0,07  | 0,008 | 0,013993 |
| Vcp       | 8,87E-07 | 0,148767 | 0,991 | 0,981 | 0,014    |
| Cluap1    | 8,97E-07 | -0,12296 | 0,255 | 0,407 | 0,014154 |
| Timp3     | 8,97E-07 | -0,10156 | 0,02  | 0,089 | 0,014157 |
| Sdr42e1   | 8,98E-07 | -0,07819 | 0,04  | 0,124 | 0,014171 |
| Plpp1     | 9,21E-07 | -0,09029 | 0,084 | 0,192 | 0,014524 |
| Usp9x     | 9,22E-07 | 0,208936 | 0,873 | 0,833 | 0,014539 |
| Gatb      | 9,22E-07 | -0,07106 | 0,079 | 0,186 | 0,01454  |
| Rcctb1    | 9,26E-07 | -0,17374 | 0,901 | 0,937 | 0,014605 |
| Mpp2      | 9,38E-07 | -0,14154 | 0,49  | 0,665 | 0,014797 |
| Eif1b     | 9,44E-07 | -0,15025 | 0,815 | 0,884 | 0,014885 |
| A330015K  | 9,44E-07 | -0,14534 | 0,339 | 0,508 | 0,014892 |
| Wdr83     | 9,55E-07 | -0,10821 | 0,193 | 0,333 | 0,015073 |
| Lrrc51    | 9,57E-07 | -0,08159 | 0,039 | 0,12  | 0,0151   |
| Borcs8    | 9,68E-07 | -0,11928 | 0,152 | 0,276 | 0,015275 |
| 1500015A  | 9,75E-07 | -0,07033 | 0,033 | 0,112 | 0,015381 |
| Dnaja3    | 9,78E-07 | -0,1125  | 0,301 | 0,466 | 0,015428 |
| Srsf9     | 9,81E-07 | -0,12981 | 0,539 | 0,7   | 0,015468 |
| Dpm1      | 9,87E-07 | -0,14053 | 0,541 | 0,709 | 0,015568 |
| Atp6v0e   | 9,89E-07 | -0,13692 | 0,613 | 0,768 | 0,015609 |
| Ccdc2     | 9,99E-07 | -0,08561 | 0,062 | 0,158 | 0,015764 |
| Vps72     | 1E-06    | -0,1307  | 0,33  | 0,489 | 0,015773 |

|           |          |          |       |       |          |
|-----------|----------|----------|-------|-------|----------|
| Cnih3     | 1,02E-06 | 0,105097 | 0,101 | 0,025 | 0,016113 |
| Efemp1    | 1,02E-06 | -0,12872 | 0,143 | 0,266 | 0,016153 |
| Kifap3    | 1,05E-06 | -0,12126 | 0,651 | 0,785 | 0,016573 |
| 26100440  | 1,06E-06 | -0,09528 | 0,084 | 0,19  | 0,016674 |
| Dynll1    | 1,06E-06 | 0,228305 | 0,998 | 0,992 | 0,016682 |
| Prkd3     | 1,06E-06 | 0,210712 | 0,719 | 0,673 | 0,016696 |
| Amer2     | 1,06E-06 | -0,17119 | 0,528 | 0,681 | 0,01675  |
| Kif5a     | 1,06E-06 | 0,226813 | 0,374 | 0,251 | 0,016765 |
| Elac2     | 1,06E-06 | -0,10153 | 0,114 | 0,23  | 0,016793 |
| Tmed1     | 1,07E-06 | -0,1176  | 0,27  | 0,422 | 0,01689  |
| Rtkn2     | 1,07E-06 | -0,0957  | 0,273 | 0,441 | 0,016921 |
| Zfp442    | 1,08E-06 | -0,07504 | 0,046 | 0,133 | 0,017065 |
| Tmem11    | 1,08E-06 | -0,1007  | 0,224 | 0,378 | 0,017108 |
| Nrbf2     | 1,09E-06 | -0,10415 | 0,257 | 0,414 | 0,017148 |
| Zfp945    | 1,09E-06 | -0,09006 | 0,099 | 0,213 | 0,017167 |
| 119000510 | 1,09E-06 | -0,15403 | 0,508 | 0,675 | 0,017172 |
| Ndufb7    | 1,1E-06  | -0,1185  | 0,939 | 0,977 | 0,017313 |
| Plp2      | 1,11E-06 | 0,123547 | 0,141 | 0,051 | 0,017443 |
| Nudt14    | 1,11E-06 | -0,1063  | 0,103 | 0,213 | 0,017497 |
| Cryzl1    | 1,11E-06 | -0,13632 | 0,453 | 0,62  | 0,017582 |
| Pdcd7     | 1,12E-06 | -0,10189 | 0,239 | 0,392 | 0,017591 |
| Borcs7    | 1,12E-06 | -0,13064 | 0,295 | 0,451 | 0,017645 |
| Elovl1    | 1,14E-06 | -0,17376 | 0,835 | 0,884 | 0,017957 |
| Ndp       | 1,14E-06 | -0,1046  | 0,094 | 0,203 | 0,018029 |
| Thoc3     | 1,15E-06 | -0,12121 | 0,288 | 0,449 | 0,018207 |
| Alad      | 1,15E-06 | -0,10963 | 0,154 | 0,281 | 0,018215 |
| Slc11a2   | 1,17E-06 | -0,11072 | 0,163 | 0,295 | 0,018457 |
| Med21     | 1,17E-06 | -0,16948 | 0,6   | 0,751 | 0,018532 |
| Tmem208   | 1,18E-06 | -0,10745 | 0,479 | 0,673 | 0,018634 |
| Saysd1    | 1,18E-06 | -0,12593 | 0,18  | 0,31  | 0,018648 |
| Spr       | 1,18E-06 | -0,11675 | 0,393 | 0,572 | 0,018677 |
| Abce1     | 1,19E-06 | -0,0934  | 0,334 | 0,521 | 0,018714 |
| Ric8a     | 1,19E-06 | -0,12084 | 0,341 | 0,511 | 0,018792 |
| Dcaf8     | 1,19E-06 | -0,16041 | 0,659 | 0,77  | 0,018835 |
| Elp4      | 1,2E-06  | -0,12378 | 0,229 | 0,371 | 0,018889 |
| Astn2     | 1,22E-06 | 0,114906 | 0,114 | 0,034 | 0,019213 |
| Gatsl2    | 1,22E-06 | -0,10923 | 0,161 | 0,297 | 0,019249 |
| Mccc1     | 1,24E-06 | -0,13411 | 0,25  | 0,395 | 0,019595 |
| Exosc9    | 1,25E-06 | -0,11247 | 0,189 | 0,323 | 0,019704 |
| Hdac11    | 1,25E-06 | 0,205565 | 0,912 | 0,869 | 0,019785 |
| Cetn2     | 1,26E-06 | -0,1086  | 0,273 | 0,432 | 0,019896 |
| Vps28     | 1,26E-06 | -0,14569 | 0,683 | 0,804 | 0,019911 |
| Exosc4    | 1,27E-06 | -0,12692 | 0,321 | 0,483 | 0,020071 |
| Romo1     | 1,28E-06 | -0,14566 | 0,62  | 0,762 | 0,020172 |
| Thop1     | 1,28E-06 | -0,09796 | 0,266 | 0,426 | 0,02022  |
| Sept1     | 1,28E-06 | -0,12584 | 0,305 | 0,462 | 0,020268 |
| Scand1    | 1,29E-06 | -0,14566 | 0,789 | 0,871 | 0,02028  |
| B9d1      | 1,29E-06 | -0,10245 | 0,127 | 0,247 | 0,020355 |
| Pbx3      | 1,29E-06 | -0,1269  | 0,288 | 0,449 | 0,020376 |
| Rab10os   | 1,3E-06  | -0,1139  | 0,294 | 0,458 | 0,020472 |
| Nfe2l2    | 1,31E-06 | -0,14708 | 0,439 | 0,597 | 0,020717 |
| Ndufs6    | 1,32E-06 | -0,13364 | 0,868 | 0,916 | 0,020805 |

|           |          |          |       |       |          |
|-----------|----------|----------|-------|-------|----------|
| Mrpl1     | 1,32E-06 | -0,09988 | 0,174 | 0,31  | 0,020822 |
| Smcp2     | 1,32E-06 | -0,13486 | 0,534 | 0,679 | 0,02089  |
| Tacc1     | 1,33E-06 | -0,14971 | 0,571 | 0,728 | 0,020948 |
| Med28     | 1,33E-06 | -0,14524 | 0,514 | 0,7   | 0,02103  |
| Hibch     | 1,34E-06 | -0,12351 | 0,206 | 0,342 | 0,021108 |
| Copa      | 1,36E-06 | 0,176677 | 0,749 | 0,673 | 0,021525 |
| Tmem56    | 1,37E-06 | -0,11381 | 0,117 | 0,234 | 0,02163  |
| 2010315B( | 1,37E-06 | -0,08628 | 0,05  | 0,137 | 0,021639 |
| Yipf1     | 1,37E-06 | -0,13129 | 0,382 | 0,553 | 0,021679 |
| Slc34a3   | 1,39E-06 | -0,17595 | 0,134 | 0,247 | 0,021879 |
| B3galt5   | 1,39E-06 | -0,18344 | 0,679 | 0,791 | 0,021913 |
| Tmem189   | 1,4E-06  | -0,1426  | 0,93  | 0,928 | 0,022008 |
| Cbr4      | 1,4E-06  | -0,08653 | 0,083 | 0,186 | 0,022058 |
| Bloc1s3   | 1,41E-06 | -0,09681 | 0,119 | 0,234 | 0,022308 |
| Rwdd1     | 1,42E-06 | -0,14229 | 0,596 | 0,749 | 0,022338 |
| Dlk2      | 1,42E-06 | -0,10015 | 0,039 | 0,118 | 0,022389 |
| Cox18     | 1,42E-06 | -0,08889 | 0,094 | 0,203 | 0,022437 |
| Rbck1     | 1,43E-06 | -0,11082 | 0,393 | 0,576 | 0,022631 |
| Snap25    | 1,44E-06 | -0,05438 | 0,006 | 0,057 | 0,022684 |
| Cnbp      | 1,47E-06 | -0,11883 | 0,952 | 0,979 | 0,023126 |
| Rab37     | 1,47E-06 | -0,2508  | 0,185 | 0,31  | 0,023171 |
| Akt1s1    | 1,49E-06 | -0,1132  | 0,44  | 0,61  | 0,023503 |
| Rnh1      | 1,49E-06 | -0,13133 | 0,495 | 0,65  | 0,023549 |
| Ube2a     | 1,5E-06  | -0,14639 | 0,275 | 0,418 | 0,023635 |
| Poldip2   | 1,5E-06  | -0,12439 | 0,33  | 0,483 | 0,023733 |
| Tbca      | 1,54E-06 | -0,11093 | 0,472 | 0,639 | 0,02435  |
| Cops9     | 1,55E-06 | -0,13695 | 0,91  | 0,92  | 0,024396 |
| Mrpl32    | 1,55E-06 | -0,10662 | 0,294 | 0,456 | 0,024483 |
| Amotl1    | 1,55E-06 | 0,137805 | 0,092 | 0,021 | 0,024483 |
| 119000710 | 1,56E-06 | -0,09922 | 0,132 | 0,253 | 0,024652 |
| Mrpl30    | 1,57E-06 | -0,12624 | 0,587 | 0,757 | 0,024701 |
| Cldn34c1  | 1,58E-06 | -0,12396 | 0,22  | 0,361 | 0,024886 |
| Cops4     | 1,58E-06 | -0,12709 | 0,492 | 0,662 | 0,024889 |
| Pdhx      | 1,58E-06 | -0,10909 | 0,174 | 0,308 | 0,024981 |
| Kcnu1     | 1,6E-06  | -0,06766 | 0,026 | 0,097 | 0,025286 |
| Apool     | 1,61E-06 | -0,10579 | 0,128 | 0,247 | 0,025391 |
| Zfp942    | 1,62E-06 | -0,09876 | 0,084 | 0,188 | 0,025618 |
| Ptprk     | 1,63E-06 | -0,12047 | 0,448 | 0,629 | 0,025683 |
| Sgk2      | 1,63E-06 | -0,11034 | 0,198 | 0,338 | 0,025708 |
| Tsg101    | 1,65E-06 | -0,1378  | 0,606 | 0,747 | 0,026089 |
| Polr3k    | 1,66E-06 | -0,10553 | 0,231 | 0,38  | 0,026123 |
| Vipas39   | 1,67E-06 | -0,10679 | 0,233 | 0,38  | 0,026272 |
| Smyd4     | 1,67E-06 | -0,07184 | 0,101 | 0,215 | 0,026379 |
| Ndufa10   | 1,67E-06 | -0,15261 | 0,763 | 0,84  | 0,026412 |
| Mrpl23    | 1,68E-06 | -0,16211 | 0,648 | 0,759 | 0,026546 |
| Psmg3     | 1,68E-06 | -0,11253 | 0,251 | 0,397 | 0,026579 |
| Sorcs3    | 1,69E-06 | -0,10491 | 0,062 | 0,154 | 0,026646 |
| BC003331  | 1,7E-06  | -0,09503 | 0,389 | 0,589 | 0,026761 |
| Tmem245   | 1,7E-06  | 0,20693  | 0,714 | 0,639 | 0,02679  |
| Rnf170    | 1,72E-06 | -0,09388 | 0,18  | 0,319 | 0,027072 |
| Mrpl27    | 1,72E-06 | -0,12401 | 0,404 | 0,591 | 0,027129 |
| Pcyox1l   | 1,73E-06 | -0,14614 | 0,283 | 0,424 | 0,02725  |

|           |          |          |       |       |          |
|-----------|----------|----------|-------|-------|----------|
| Nudt7     | 1,74E-06 | -0,09459 | 0,072 | 0,169 | 0,027468 |
| Zfp322a   | 1,75E-06 | -0,10773 | 0,149 | 0,276 | 0,02755  |
| CamI      | 1,77E-06 | -0,12541 | 0,389 | 0,561 | 0,027906 |
| Alg1      | 1,77E-06 | -0,10386 | 0,198 | 0,34  | 0,027936 |
| Slpi      | 1,79E-06 | -0,12507 | 0,112 | 0,224 | 0,028239 |
| Gulp1     | 1,79E-06 | 0,100426 | 0,103 | 0,027 | 0,028249 |
| Chchd7    | 1,81E-06 | -0,11886 | 0,328 | 0,489 | 0,028548 |
| Fam49b    | 1,82E-06 | -0,15549 | 0,578 | 0,698 | 0,028647 |
| 0610012Gf | 1,82E-06 | -0,11639 | 0,422 | 0,593 | 0,028656 |
| Irf9      | 1,82E-06 | 0,200321 | 0,207 | 0,101 | 0,028786 |
| Mrto4     | 1,85E-06 | -0,08188 | 0,389 | 0,58  | 0,029195 |
| Nipsnap3b | 1,85E-06 | -0,13142 | 0,481 | 0,641 | 0,029215 |
| A830010M  | 1,85E-06 | -0,11728 | 0,393 | 0,572 | 0,029242 |
| Snrnp27   | 1,87E-06 | -0,13801 | 0,673 | 0,814 | 0,029462 |
| Timm10    | 1,87E-06 | -0,09721 | 0,198 | 0,335 | 0,029527 |
| Polr2g    | 1,92E-06 | -0,12397 | 0,574 | 0,73  | 0,030317 |
| Rap1a     | 1,92E-06 | -0,15541 | 0,994 | 0,996 | 0,030319 |
| Clpb      | 1,93E-06 | -0,12662 | 0,303 | 0,46  | 0,030377 |
| Ubap2l    | 1,93E-06 | 0,210289 | 0,719 | 0,658 | 0,030439 |
| Sssca1    | 1,93E-06 | -0,1091  | 0,371 | 0,549 | 0,030514 |
| Esd       | 1,95E-06 | -0,13772 | 0,547 | 0,717 | 0,030705 |
| Pdlim1    | 1,95E-06 | -0,15    | 0,444 | 0,597 | 0,030743 |
| Tmem175   | 1,95E-06 | -0,09541 | 0,139 | 0,264 | 0,030749 |
| Tax1bp1   | 2E-06    | -0,1585  | 0,804 | 0,873 | 0,031533 |
| Tnfsf9    | 2E-06    | 0,163729 | 0,147 | 0,057 | 0,031549 |
| Cdc34     | 2,01E-06 | -0,10981 | 0,202 | 0,34  | 0,031774 |
| Smap1     | 2,04E-06 | -0,15416 | 0,556 | 0,662 | 0,032127 |
| Rnpep     | 2,06E-06 | -0,12623 | 0,268 | 0,418 | 0,032479 |
| Rbms1     | 2,06E-06 | 0,270615 | 0,345 | 0,226 | 0,032536 |
| Plrg1     | 2,07E-06 | -0,12433 | 0,259 | 0,405 | 0,032586 |
| Aldh7a1   | 2,08E-06 | -0,11257 | 0,229 | 0,376 | 0,032806 |
| 0610037L1 | 2,1E-06  | -0,10761 | 0,385 | 0,561 | 0,033122 |
| Ncl       | 2,11E-06 | 0,201902 | 0,976 | 0,97  | 0,033211 |
| Adamts20  | 2,13E-06 | -0,08373 | 0,106 | 0,219 | 0,033579 |
| Tmod1     | 2,13E-06 | 0,218278 | 0,961 | 0,861 | 0,033617 |
| Pcsk1n    | 2,13E-06 | -0,17337 | 0,939 | 0,945 | 0,033622 |
| Plxna1    | 2,13E-06 | 0,133174 | 0,2   | 0,097 | 0,033627 |
| Isoc2a    | 2,14E-06 | -0,09954 | 0,145 | 0,268 | 0,033801 |
| Atp5d     | 2,15E-06 | -0,11787 | 0,956 | 0,962 | 0,033911 |
| Creld2    | 2,16E-06 | -0,08775 | 0,189 | 0,331 | 0,034148 |
| Vps16     | 2,19E-06 | -0,08771 | 0,246 | 0,401 | 0,03458  |
| Rgs3      | 2,2E-06  | 0,199956 | 0,771 | 0,726 | 0,03464  |
| Mtm1      | 2,21E-06 | -0,1286  | 0,248 | 0,39  | 0,03482  |
| Gpr89     | 2,24E-06 | -0,11978 | 0,231 | 0,369 | 0,0353   |
| Snhg6     | 2,24E-06 | -0,13636 | 0,464 | 0,622 | 0,03537  |
| Tmed3     | 2,25E-06 | -0,14647 | 0,512 | 0,679 | 0,035437 |
| Atp8a1    | 2,25E-06 | 0,153038 | 0,987 | 0,975 | 0,0355   |
| Yif1b     | 2,26E-06 | -0,12114 | 0,539 | 0,694 | 0,035645 |
| Dusp3     | 2,28E-06 | -0,17677 | 0,85  | 0,878 | 0,035951 |
| Hpf1      | 2,29E-06 | -0,12734 | 0,426 | 0,584 | 0,036088 |
| Dync1i1   | 2,29E-06 | -0,08846 | 0,088 | 0,192 | 0,036131 |
| Etfa      | 2,32E-06 | -0,09745 | 0,215 | 0,361 | 0,036595 |

|          |          |          |       |       |          |
|----------|----------|----------|-------|-------|----------|
| Parp8    | 2,38E-06 | -0,09903 | 0,095 | 0,2   | 0,037484 |
| Gm26724  | 2,38E-06 | -0,07404 | 0,077 | 0,177 | 0,037489 |
| Ccndbp1  | 2,38E-06 | -0,13684 | 0,565 | 0,715 | 0,037497 |
| Polr2m   | 2,4E-06  | -0,10436 | 0,354 | 0,53  | 0,037875 |
| Tbce     | 2,44E-06 | -0,09998 | 0,242 | 0,401 | 0,038463 |
| Wdr77    | 2,44E-06 | -0,13385 | 0,217 | 0,346 | 0,038492 |
| Uri1     | 2,45E-06 | -0,09358 | 0,316 | 0,485 | 0,038716 |
| Ankrd13a | 2,46E-06 | 0,19877  | 0,804 | 0,757 | 0,038828 |
| Fam122a  | 2,51E-06 | -0,10332 | 0,187 | 0,321 | 0,039532 |
| Cbx5     | 2,51E-06 | 0,210162 | 0,692 | 0,637 | 0,039648 |
| Ap5s1    | 2,53E-06 | -0,08739 | 0,073 | 0,169 | 0,039972 |
| Msn      | 2,58E-06 | 0,204286 | 0,655 | 0,559 | 0,040625 |
| Rpp25l   | 2,58E-06 | -0,10646 | 0,228 | 0,369 | 0,040628 |
| Wnk1     | 2,59E-06 | 0,147042 | 1     | 0,998 | 0,040789 |
| Ndufaf4  | 2,62E-06 | -0,11893 | 0,182 | 0,31  | 0,041262 |
| Slc35b3  | 2,62E-06 | -0,09743 | 0,127 | 0,243 | 0,041373 |
| Coa6     | 2,64E-06 | -0,10521 | 0,262 | 0,411 | 0,041676 |
| Sv2a     | 2,66E-06 | -0,13757 | 0,996 | 0,994 | 0,041984 |
| Fam104a  | 2,68E-06 | -0,122   | 0,446 | 0,616 | 0,042356 |
| Fibp     | 2,69E-06 | -0,12277 | 0,24  | 0,382 | 0,042407 |
| Trappc1  | 2,71E-06 | -0,13134 | 0,255 | 0,395 | 0,042703 |
| Cenpv    | 2,72E-06 | -0,1121  | 0,169 | 0,295 | 0,042887 |
| Efna2    | 2,74E-06 | -0,10139 | 0,207 | 0,344 | 0,043253 |
| Bet1l    | 2,74E-06 | -0,10427 | 0,31  | 0,475 | 0,043282 |
| Smim14   | 2,76E-06 | -0,14538 | 0,811 | 0,867 | 0,043574 |
| Gps1     | 2,78E-06 | -0,11833 | 0,554 | 0,719 | 0,043808 |
| Ctsf     | 2,78E-06 | -0,10309 | 0,396 | 0,572 | 0,043849 |
| Cdkl5    | 2,86E-06 | -0,14065 | 0,426 | 0,595 | 0,045063 |
| Cnpy3    | 2,88E-06 | -0,10804 | 0,437 | 0,612 | 0,045432 |
| Gpr137b  | 2,88E-06 | -0,14632 | 0,343 | 0,511 | 0,045477 |
| Mlycd    | 2,91E-06 | -0,10783 | 0,183 | 0,314 | 0,045832 |
| Klhdc2   | 2,92E-06 | -0,11395 | 0,49  | 0,654 | 0,046085 |
| Ube2g2   | 2,93E-06 | -0,09715 | 0,182 | 0,316 | 0,046194 |
| Gm45356  | 2,94E-06 | -0,07122 | 0,028 | 0,097 | 0,046405 |
| Cep41    | 2,95E-06 | -0,08551 | 0,081 | 0,181 | 0,046476 |
| Rnf181   | 3E-06    | -0,13958 | 0,732 | 0,827 | 0,047329 |
| Rbm18    | 3,02E-06 | -0,09809 | 0,332 | 0,494 | 0,047646 |
| Cdkn1a   | 3,02E-06 | 0,330219 | 0,189 | 0,089 | 0,047697 |
| Sephs2   | 3,06E-06 | -0,11226 | 0,183 | 0,31  | 0,048335 |
| Sh3gl2   | 3,08E-06 | -0,10437 | 0,084 | 0,184 | 0,04864  |
| Pmf1     | 3,09E-06 | -0,07046 | 0,039 | 0,116 | 0,048739 |
| Emc9     | 3,11E-06 | -0,10459 | 0,217 | 0,354 | 0,049089 |
| Emd      | 3,11E-06 | -0,1116  | 0,288 | 0,439 | 0,049123 |
| Enpp6    | 3,16E-06 | 0,148616 | 0,938 | 0,751 | 0,049807 |
| Chm      | 3,16E-06 | -0,09334 | 0,325 | 0,496 | 0,049841 |
| Rnf214   | 3,16E-06 | -0,09673 | 0,264 | 0,42  | 0,04986  |
| Lss      | 3,17E-06 | 0,30301  | 0,402 | 0,3   | 0,05008  |
| Paip1    | 3,18E-06 | -0,10393 | 0,622 | 0,785 | 0,050125 |
| Tada2a   | 3,2E-06  | -0,10085 | 0,244 | 0,388 | 0,050444 |
| Nbdy     | 3,2E-06  | -0,09835 | 0,108 | 0,217 | 0,050507 |
| Kif1bp   | 3,2E-06  | -0,13126 | 0,866 | 0,922 | 0,050525 |
| Tmem129  | 3,23E-06 | -0,1009  | 0,167 | 0,293 | 0,051022 |

|          |          |          |       |       |          |
|----------|----------|----------|-------|-------|----------|
| Nme1     | 3,27E-06 | -0,1467  | 0,602 | 0,734 | 0,051551 |
| Ppie     | 3,28E-06 | -0,08363 | 0,18  | 0,31  | 0,05174  |
| Dzip3    | 3,29E-06 | -0,07949 | 0,18  | 0,314 | 0,051922 |
| Acy1     | 3,3E-06  | -0,11899 | 0,273 | 0,428 | 0,051992 |
| Grpel1   | 3,3E-06  | -0,12845 | 0,528 | 0,677 | 0,052109 |
| Supt4a   | 3,3E-06  | -0,14037 | 0,694 | 0,812 | 0,052111 |
| Adgrv1   | 3,33E-06 | -0,11711 | 0,202 | 0,335 | 0,052461 |
| Fbxo22   | 3,33E-06 | -0,12367 | 0,228 | 0,359 | 0,052487 |
| Rfesd    | 3,34E-06 | -0,09103 | 0,11  | 0,219 | 0,052645 |
| Tap1     | 3,35E-06 | 0,132755 | 0,055 | 0,004 | 0,052841 |
| Gm36356  | 3,38E-06 | -0,0901  | 0,051 | 0,135 | 0,05333  |
| Itpa     | 3,39E-06 | -0,12084 | 0,294 | 0,443 | 0,053494 |
| Gse1     | 3,43E-06 | 0,243979 | 0,484 | 0,399 | 0,054125 |
| Dnajb12  | 3,46E-06 | -0,11666 | 0,473 | 0,641 | 0,054571 |
| Frs3     | 3,48E-06 | -0,08714 | 0,145 | 0,268 | 0,054825 |
| Gpr62    | 3,49E-06 | -0,1454  | 0,859 | 0,914 | 0,055133 |
| Zfp958   | 3,5E-06  | -0,07711 | 0,05  | 0,133 | 0,055288 |
| Scg5     | 3,51E-06 | -0,21703 | 0,622 | 0,734 | 0,055337 |
| Dscr3    | 3,53E-06 | -0,10634 | 0,182 | 0,314 | 0,0557   |
| Ephb2    | 3,54E-06 | 0,097137 | 0,081 | 0,017 | 0,055829 |
| Casq1    | 3,54E-06 | -0,0873  | 0,068 | 0,16  | 0,055861 |
| Sccpdh   | 3,55E-06 | -0,2509  | 0,945 | 0,943 | 0,056021 |
| Clstn1   | 3,58E-06 | 0,201147 | 0,763 | 0,711 | 0,056462 |
| Ptma     | 3,58E-06 | 0,126424 | 1     | 0,998 | 0,056472 |
| Nudc     | 3,6E-06  | -0,12101 | 0,835 | 0,901 | 0,056728 |
| Gapdh    | 3,6E-06  | -0,14521 | 0,998 | 0,998 | 0,056829 |
| Polr2f   | 3,63E-06 | -0,11696 | 0,965 | 0,97  | 0,057244 |
| Gm13293  | 3,65E-06 | -0,12411 | 0,292 | 0,445 | 0,057513 |
| Pitpna   | 3,66E-06 | -0,13415 | 0,578 | 0,717 | 0,057672 |
| Tubgcp5  | 3,68E-06 | -0,11357 | 0,198 | 0,331 | 0,058081 |
| Stt3a    | 3,69E-06 | 0,192555 | 0,714 | 0,65  | 0,058168 |
| Map6d1   | 3,7E-06  | -0,15496 | 0,717 | 0,806 | 0,058335 |
| Tmem234  | 3,7E-06  | -0,10976 | 0,927 | 0,937 | 0,058349 |
| Leprot   | 3,72E-06 | -0,13869 | 0,591 | 0,709 | 0,058723 |
| Cnot1    | 3,73E-06 | 0,202962 | 0,569 | 0,485 | 0,058826 |
| Thap3    | 3,74E-06 | -0,12135 | 0,303 | 0,451 | 0,059053 |
| Vwa1     | 3,78E-06 | 0,309974 | 0,36  | 0,253 | 0,059687 |
| Dexi     | 3,81E-06 | -0,10096 | 0,167 | 0,293 | 0,060153 |
| Zfp800   | 3,86E-06 | -0,11411 | 0,367 | 0,536 | 0,060824 |
| Paqr7    | 3,87E-06 | -0,09534 | 0,136 | 0,253 | 0,060977 |
| Plec     | 3,87E-06 | 0,08931  | 0,088 | 0,021 | 0,060992 |
| Trim2    | 3,87E-06 | -0,13759 | 0,967 | 0,981 | 0,0611   |
| Tmem63a  | 3,88E-06 | -0,12786 | 0,956 | 0,981 | 0,061239 |
| Mlf2     | 3,9E-06  | -0,11199 | 0,976 | 0,973 | 0,061507 |
| Acaa1a   | 3,9E-06  | -0,12999 | 0,879 | 0,935 | 0,061531 |
| Tle3     | 3,91E-06 | 0,314697 | 0,525 | 0,449 | 0,06171  |
| Spag7    | 3,93E-06 | -0,12051 | 0,437 | 0,603 | 0,062045 |
| Gpr3711  | 4E-06    | -0,07059 | 0,017 | 0,076 | 0,063139 |
| Sil1     | 4,09E-06 | -0,12895 | 0,295 | 0,437 | 0,064563 |
| Hint2    | 4,09E-06 | -0,10911 | 0,244 | 0,388 | 0,064597 |
| Srd5a3   | 4,15E-06 | -0,12035 | 0,261 | 0,405 | 0,065425 |
| 2700062C | 4,15E-06 | -0,11145 | 0,202 | 0,331 | 0,065469 |



|           |          |          |       |       |          |
|-----------|----------|----------|-------|-------|----------|
| AU041133  | 4,18E-06 | -0,07046 | 0,037 | 0,112 | 0,065872 |
| Snx18     | 4,23E-06 | -0,14838 | 0,4   | 0,557 | 0,066715 |
| H1fx      | 4,25E-06 | -0,08653 | 0,068 | 0,16  | 0,067056 |
| Klf9      | 4,26E-06 | -0,14079 | 0,749 | 0,842 | 0,067261 |
| Tmem163   | 4,31E-06 | -0,14844 | 0,16  | 0,281 | 0,068009 |
| Fabp5     | 4,33E-06 | -0,15978 | 0,994 | 0,998 | 0,068285 |
| Nop16     | 4,36E-06 | -0,09774 | 0,167 | 0,291 | 0,068765 |
| Naca      | 4,37E-06 | -0,12081 | 0,976 | 0,981 | 0,068892 |
| Tubb2a    | 4,37E-06 | -0,14796 | 0,165 | 0,289 | 0,068937 |
| Wsb1      | 4,43E-06 | 0,237937 | 0,51  | 0,409 | 0,069919 |
| Ubl7      | 4,58E-06 | -0,09838 | 0,299 | 0,449 | 0,072179 |
| Zfp930    | 4,58E-06 | -0,06883 | 0,042 | 0,12  | 0,072223 |
| Mrps30    | 4,64E-06 | -0,09824 | 0,15  | 0,27  | 0,07315  |
| 9330159F1 | 4,64E-06 | -0,13489 | 0,319 | 0,468 | 0,073247 |
| Tomm40    | 4,67E-06 | -0,09733 | 0,371 | 0,538 | 0,073611 |
| Etfrf1    | 4,72E-06 | -0,09788 | 0,273 | 0,424 | 0,074387 |
| Snx21     | 4,76E-06 | -0,09235 | 0,174 | 0,302 | 0,075029 |
| Akirin1   | 4,81E-06 | -0,15069 | 0,609 | 0,738 | 0,075922 |
| Ccl25     | 4,82E-06 | -0,08766 | 0,073 | 0,167 | 0,075974 |
| Zfp617    | 4,82E-06 | -0,10207 | 0,156 | 0,276 | 0,07603  |
| mt-Co3    | 4,85E-06 | -0,09657 | 1     | 1     | 0,076526 |
| Tcta      | 4,94E-06 | -0,10627 | 0,213 | 0,348 | 0,077931 |
| Ppme1     | 4,94E-06 | -0,12275 | 0,354 | 0,523 | 0,077937 |
| Rmi1      | 4,94E-06 | -0,08551 | 0,084 | 0,184 | 0,077955 |
| Lpcat3    | 4,96E-06 | -0,0993  | 0,189 | 0,321 | 0,078191 |
| Lrrc42    | 4,97E-06 | -0,10196 | 0,15  | 0,27  | 0,078415 |
| Cdk5      | 5,02E-06 | -0,14577 | 0,648 | 0,762 | 0,079166 |
| Rpl39     | 5,03E-06 | -0,09553 | 0,993 | 0,985 | 0,079281 |
| Slc50a1   | 5,04E-06 | -0,13651 | 0,679 | 0,814 | 0,079491 |
| Orc4      | 5,07E-06 | -0,11787 | 0,275 | 0,418 | 0,079926 |
| Spcs2     | 5,08E-06 | -0,11681 | 0,936 | 0,973 | 0,080214 |
| Cog6      | 5,12E-06 | -0,07942 | 0,16  | 0,289 | 0,080817 |
| Src       | 5,13E-06 | 0,114337 | 0,156 | 0,065 | 0,080939 |
| Rnf149    | 5,17E-06 | -0,11287 | 0,283 | 0,426 | 0,081619 |
| Hebp1     | 5,19E-06 | 0,232886 | 0,747 | 0,671 | 0,081807 |
| Pnmal1    | 5,27E-06 | -0,08675 | 0,057 | 0,141 | 0,083114 |
| Dmac2     | 5,3E-06  | -0,0952  | 0,121 | 0,232 | 0,083611 |
| Cops3     | 5,36E-06 | -0,13538 | 0,479 | 0,631 | 0,084488 |
| Ap3m1     | 5,37E-06 | -0,10786 | 0,442 | 0,624 | 0,084717 |
| Fnip1     | 5,37E-06 | 0,207581 | 0,727 | 0,7   | 0,084749 |
| Clip3     | 5,4E-06  | 0,145376 | 0,969 | 0,932 | 0,085195 |
| Sorcs1    | 5,42E-06 | -0,09603 | 0,228 | 0,365 | 0,085472 |
| Gm14326   | 5,42E-06 | -0,08865 | 0,064 | 0,152 | 0,085514 |
| Plpp6     | 5,43E-06 | -0,09113 | 0,081 | 0,175 | 0,085667 |
| Tfam      | 5,46E-06 | -0,0976  | 0,286 | 0,441 | 0,086074 |
| Wdr60     | 5,5E-06  | -0,1076  | 0,193 | 0,323 | 0,086698 |
| Kdm5d     | 5,6E-06  | -0,08626 | 0,068 | 0,158 | 0,088347 |
| Tusc2     | 5,65E-06 | -0,11646 | 0,273 | 0,416 | 0,089058 |
| Tmem161a  | 5,66E-06 | -0,1113  | 0,35  | 0,515 | 0,089295 |
| Cr1l      | 5,75E-06 | -0,12969 | 0,323 | 0,477 | 0,090716 |
| Tceal8    | 5,78E-06 | -0,08018 | 0,257 | 0,407 | 0,091145 |
| Stard13   | 5,78E-06 | -0,09519 | 0,183 | 0,314 | 0,091188 |

|          |          |          |       |       |          |
|----------|----------|----------|-------|-------|----------|
| Pxk      | 5,79E-06 | -0,10252 | 0,339 | 0,498 | 0,091392 |
| Kctd3    | 5,8E-06  | -0,15391 | 0,763 | 0,861 | 0,091523 |
| Selenom  | 5,8E-06  | -0,14181 | 0,963 | 0,973 | 0,091567 |
| Zdhhc4   | 5,83E-06 | -0,10288 | 0,176 | 0,302 | 0,091934 |
| Letm2    | 5,83E-06 | -0,10911 | 0,235 | 0,382 | 0,091998 |
| Gm11808  | 5,89E-06 | 0,206725 | 0,644 | 0,584 | 0,092978 |
| Daam1    | 5,91E-06 | 0,173416 | 0,95  | 0,873 | 0,093184 |
| Psmb7    | 5,92E-06 | -0,12019 | 0,818 | 0,888 | 0,093428 |
| Fgf7     | 5,99E-06 | 0,141363 | 0,163 | 0,072 | 0,094517 |
| Tmem184c | 6E-06    | -0,13543 | 0,462 | 0,622 | 0,094655 |
| Adamtsl4 | 6,02E-06 | -0,13796 | 0,606 | 0,759 | 0,094993 |
| Acot8    | 6,11E-06 | -0,09939 | 0,161 | 0,283 | 0,09633  |
| Lrrn3    | 6,11E-06 | -0,07234 | 0,037 | 0,11  | 0,096464 |
| Ube2d1   | 6,12E-06 | -0,12226 | 0,932 | 0,93  | 0,096535 |
| Rheb     | 6,17E-06 | -0,12579 | 0,534 | 0,688 | 0,097387 |
| Nubp2    | 6,19E-06 | -0,08593 | 0,321 | 0,485 | 0,097576 |
| Gpatch2  | 6,19E-06 | -0,09112 | 0,257 | 0,401 | 0,097713 |
| Zfp593   | 6,2E-06  | -0,08845 | 0,141 | 0,257 | 0,097778 |
| Adam11   | 6,23E-06 | -0,1471  | 0,13  | 0,241 | 0,098346 |
| Nfic     | 6,25E-06 | 0,188318 | 0,941 | 0,907 | 0,098672 |
| Sec22b   | 6,26E-06 | -0,09574 | 0,31  | 0,466 | 0,098744 |
| Pafah1b1 | 6,38E-06 | -0,10921 | 0,998 | 0,998 | 0,100658 |
| Mthfd1   | 6,41E-06 | -0,09645 | 0,202 | 0,335 | 0,10109  |
| Caskin2  | 6,49E-06 | -0,0969  | 0,231 | 0,373 | 0,102347 |
| Sbno1    | 6,5E-06  | 0,194861 | 0,796 | 0,757 | 0,102549 |
| Taf12    | 6,51E-06 | -0,10548 | 0,235 | 0,371 | 0,102778 |
| Rfc4     | 6,56E-06 | -0,08802 | 0,081 | 0,175 | 0,103507 |
| Rab13    | 6,58E-06 | -0,09856 | 0,114 | 0,219 | 0,10384  |
| Wdr61    | 6,61E-06 | -0,10835 | 0,323 | 0,475 | 0,104262 |
| Osgep    | 6,61E-06 | -0,12311 | 0,391 | 0,54  | 0,104335 |
| Tmem147  | 6,64E-06 | -0,11027 | 0,692 | 0,825 | 0,104772 |
| Slc25a39 | 6,66E-06 | -0,10912 | 0,316 | 0,468 | 0,105137 |
| Hist1h1c | 6,67E-06 | -0,12689 | 0,13  | 0,245 | 0,10528  |
| Tmem98   | 6,7E-06  | -0,14475 | 0,655 | 0,797 | 0,105646 |
| Zfp27    | 6,7E-06  | -0,07059 | 0,042 | 0,118 | 0,105659 |
| Msantd4  | 6,73E-06 | -0,10586 | 0,277 | 0,422 | 0,106101 |
| Atf7ip   | 6,75E-06 | 0,210765 | 0,752 | 0,698 | 0,106418 |
| Tubd1    | 6,78E-06 | -0,06466 | 0,037 | 0,11  | 0,106958 |
| Btbd10   | 6,78E-06 | -0,10081 | 0,229 | 0,365 | 0,106977 |
| Eci1     | 6,79E-06 | -0,11377 | 0,45  | 0,624 | 0,10707  |
| Hspa1a   | 6,84E-06 | 0,310782 | 0,486 | 0,361 | 0,107837 |
| Smad7    | 6,89E-06 | 0,16719  | 0,98  | 0,979 | 0,108694 |
| Adrm1    | 6,9E-06  | -0,12154 | 0,479 | 0,635 | 0,108903 |
| Akr1e1   | 6,91E-06 | -0,0832  | 0,083 | 0,177 | 0,108982 |
| Gcfc2    | 6,92E-06 | -0,09259 | 0,086 | 0,184 | 0,109248 |
| Zfp523   | 6,95E-06 | -0,08101 | 0,167 | 0,295 | 0,109712 |
| Prex1    | 6,98E-06 | -0,13422 | 0,418 | 0,576 | 0,110174 |
| Gpr137   | 7E-06    | -0,09031 | 0,248 | 0,395 | 0,110446 |
| Fgfr1    | 7,03E-06 | -0,08214 | 0,103 | 0,209 | 0,110971 |
| Pigs     | 7,05E-06 | -0,09876 | 0,305 | 0,456 | 0,111163 |
| Crybg3   | 7,06E-06 | -0,16171 | 0,385 | 0,523 | 0,111418 |
| Imp4     | 7,13E-06 | -0,10568 | 0,462 | 0,627 | 0,112544 |

|           |          |          |       |       |          |
|-----------|----------|----------|-------|-------|----------|
| Hilpda    | 7,21E-06 | -0,07222 | 0,039 | 0,112 | 0,113667 |
| Rgcc      | 7,26E-06 | -0,04372 | 0,004 | 0,046 | 0,114534 |
| Nosip     | 7,28E-06 | -0,10198 | 0,314 | 0,462 | 0,114859 |
| Gorab     | 7,36E-06 | -0,09004 | 0,083 | 0,177 | 0,116046 |
| Zfp992    | 7,36E-06 | -0,0629  | 0,033 | 0,103 | 0,116155 |
| Coq9      | 7,41E-06 | -0,07649 | 0,185 | 0,316 | 0,116931 |
| 6530409C: | 7,43E-06 | -0,06682 | 0,033 | 0,103 | 0,117291 |
| Rnps1     | 7,44E-06 | -0,09468 | 0,323 | 0,487 | 0,117408 |
| Aqp4      | 7,45E-06 | -0,0519  | 0,004 | 0,046 | 0,11751  |
| Hsd17b4   | 7,47E-06 | -0,13875 | 0,673 | 0,778 | 0,117858 |
| Slc24a4   | 7,47E-06 | 0,07769  | 0,057 | 0,006 | 0,117925 |
| Ano4      | 7,5E-06  | -0,16847 | 0,574 | 0,694 | 0,118375 |
| Wipf1     | 7,53E-06 | 0,193913 | 0,613 | 0,517 | 0,118802 |
| Rabl6     | 7,54E-06 | -0,11611 | 0,338 | 0,483 | 0,118904 |
| Usp31     | 7,54E-06 | -0,1323  | 0,783 | 0,854 | 0,118975 |
| Fam107b   | 7,55E-06 | -0,11928 | 0,149 | 0,259 | 0,119154 |
| Desi1     | 7,59E-06 | -0,1774  | 0,963 | 0,979 | 0,119732 |
| Commd8    | 7,59E-06 | -0,12804 | 0,488 | 0,635 | 0,119813 |
| Snapc5    | 7,65E-06 | -0,11294 | 0,501 | 0,648 | 0,120608 |
| Zfp605    | 7,65E-06 | -0,08334 | 0,134 | 0,249 | 0,120671 |
| Cbs       | 7,66E-06 | -0,214   | 0,161 | 0,272 | 0,120888 |
| Id2       | 7,67E-06 | 0,231644 | 0,141 | 0,059 | 0,120988 |
| Tmem29    | 7,7E-06  | -0,09603 | 0,156 | 0,274 | 0,121427 |
| Dlg1      | 7,74E-06 | 0,160172 | 0,872 | 0,774 | 0,12214  |
| Rab28     | 7,75E-06 | -0,07477 | 0,244 | 0,39  | 0,122269 |
| Pus3      | 7,78E-06 | -0,08497 | 0,106 | 0,211 | 0,122772 |
| Faap24    | 7,91E-06 | -0,08802 | 0,086 | 0,181 | 0,124851 |
| Csnk1g3   | 7,92E-06 | -0,11853 | 0,334 | 0,487 | 0,124978 |
| Ppp2cb    | 7,96E-06 | -0,10117 | 0,204 | 0,331 | 0,125514 |
| Efl1      | 7,97E-06 | -0,09094 | 0,156 | 0,274 | 0,125739 |
| Ptdss2    | 8,04E-06 | -0,09612 | 0,306 | 0,458 | 0,126879 |
| Opalin    | 8,08E-06 | -0,36893 | 0,802 | 0,759 | 0,12748  |
| Morf4l1   | 8,1E-06  | -0,09604 | 0,998 | 0,996 | 0,127751 |
| Rc3h1     | 8,11E-06 | 0,260022 | 0,624 | 0,58  | 0,127952 |
| Gm13889   | 8,17E-06 | -0,0796  | 0,051 | 0,131 | 0,128896 |
| Psemb1    | 8,18E-06 | -0,11389 | 0,941 | 0,973 | 0,129085 |
| Prpsap1   | 8,2E-06  | -0,12835 | 0,607 | 0,736 | 0,129399 |
| Tub       | 8,36E-06 | -0,03727 | 0     | 0,036 | 0,131872 |
| Tmem167   | 8,38E-06 | -0,13391 | 0,55  | 0,717 | 0,132243 |
| Rilpl2    | 8,43E-06 | -0,09837 | 0,152 | 0,268 | 0,133056 |
| Rtkn      | 8,44E-06 | 0,173421 | 0,881 | 0,806 | 0,133103 |
| Nfs1      | 8,5E-06  | -0,09988 | 0,178 | 0,302 | 0,134109 |
| Dnajb11   | 8,52E-06 | -0,11404 | 0,541 | 0,681 | 0,134353 |
| Msrb2     | 8,53E-06 | -0,05968 | 0,039 | 0,112 | 0,134549 |
| 1110046JC | 8,53E-06 | -0,10132 | 0,16  | 0,281 | 0,134573 |
| Zfp449    | 8,53E-06 | -0,06054 | 0,046 | 0,124 | 0,13464  |
| Cdpf1     | 8,59E-06 | -0,10245 | 0,13  | 0,241 | 0,13556  |
| Tprn      | 8,6E-06  | 0,18324  | 0,903 | 0,863 | 0,135629 |
| Ehd2      | 8,62E-06 | 0,080662 | 0,081 | 0,019 | 0,13606  |
| Plppr5    | 8,67E-06 | -0,04697 | 0,007 | 0,055 | 0,136705 |
| Ppp2r5a   | 8,8E-06  | 0,171093 | 0,73  | 0,65  | 0,138819 |
| Dhx9      | 8,83E-06 | 0,201529 | 0,598 | 0,534 | 0,139234 |

|           |          |          |       |       |          |
|-----------|----------|----------|-------|-------|----------|
| Orc6      | 8,83E-06 | -0,11924 | 0,27  | 0,407 | 0,139297 |
| Zfp512    | 8,83E-06 | -0,10616 | 0,312 | 0,464 | 0,139352 |
| Aurkaip1  | 8,89E-06 | -0,13873 | 0,651 | 0,776 | 0,140247 |
| Sec61a1   | 8,92E-06 | 0,202567 | 0,666 | 0,601 | 0,140726 |
| Bag5      | 9,04E-06 | -0,09779 | 0,248 | 0,386 | 0,142563 |
| Cd109     | 9,08E-06 | 0,082312 | 0,061 | 0,008 | 0,143243 |
| Akr1a1    | 9,1E-06  | -0,11998 | 0,921 | 0,939 | 0,143493 |
| Pcbp2     | 9,13E-06 | 0,152219 | 0,987 | 0,966 | 0,144064 |
| Cyp46a1   | 9,14E-06 | -0,0652  | 0,039 | 0,112 | 0,144118 |
| Smim7     | 9,17E-06 | -0,1349  | 0,73  | 0,81  | 0,144623 |
| Mri1      | 9,27E-06 | -0,08184 | 0,094 | 0,192 | 0,146309 |
| Phax      | 9,28E-06 | -0,10266 | 0,446 | 0,627 | 0,146459 |
| Dbt       | 9,4E-06  | -0,10775 | 0,262 | 0,407 | 0,148244 |
| Exosc5    | 9,42E-06 | -0,0976  | 0,283 | 0,428 | 0,148598 |
| 2810004N: | 9,45E-06 | -0,11695 | 0,378 | 0,536 | 0,149053 |
| Serbp1    | 9,55E-06 | 0,171684 | 0,976 | 0,956 | 0,150594 |
| Mast3     | 9,57E-06 | 0,187839 | 0,853 | 0,797 | 0,150943 |
| Brcc3     | 9,67E-06 | -0,10653 | 0,284 | 0,426 | 0,152531 |
| Acp1      | 9,74E-06 | -0,12913 | 0,556 | 0,698 | 0,1536   |
| Hmgxb4    | 9,78E-06 | -0,10549 | 0,253 | 0,388 | 0,154252 |
| Rpa1      | 9,8E-06  | -0,11492 | 0,354 | 0,5   | 0,154579 |
| Nudt18    | 9,83E-06 | -0,10138 | 0,176 | 0,297 | 0,155048 |
| Dcun1d5   | 9,88E-06 | -0,09798 | 0,36  | 0,527 | 0,155814 |
| Letmd1    | 9,88E-06 | -0,0944  | 0,264 | 0,407 | 0,155922 |
| Tomm22    | 9,9E-06  | -0,12683 | 0,661 | 0,791 | 0,156165 |
| Pet100    | 9,94E-06 | -0,13524 | 0,763 | 0,844 | 0,156817 |
| N6amt1    | 9,99E-06 | -0,10991 | 0,139 | 0,249 | 0,157588 |
| Tcp11l1   | 1,01E-05 | -0,08888 | 0,213 | 0,346 | 0,15858  |
| Ube2m     | 1,01E-05 | -0,11627 | 0,701 | 0,814 | 0,158877 |
| Pfdn6     | 1,01E-05 | -0,11529 | 0,791 | 0,892 | 0,159307 |
| Egln1     | 1,02E-05 | -0,08059 | 0,479 | 0,658 | 0,160435 |
| Ccdc94    | 1,02E-05 | -0,06494 | 0,055 | 0,137 | 0,161512 |
| Ggh       | 1,03E-05 | -0,12037 | 0,462 | 0,622 | 0,161826 |
| Fastkd1   | 1,03E-05 | -0,08461 | 0,103 | 0,205 | 0,162691 |
| Hras      | 1,03E-05 | -0,11288 | 0,47  | 0,629 | 0,162862 |
| Eya4      | 1,04E-05 | 0,211496 | 0,259 | 0,156 | 0,16383  |
| AC129328. | 1,05E-05 | -0,06233 | 0,028 | 0,093 | 0,164872 |
| Rps15     | 1,05E-05 | 0,151004 | 0,996 | 0,996 | 0,165047 |
| Ciao1     | 1,05E-05 | -0,10936 | 0,262 | 0,399 | 0,165232 |
| 3110009E1 | 1,05E-05 | -0,08662 | 0,09  | 0,186 | 0,1654   |
| Wdr20     | 1,05E-05 | -0,14875 | 0,479 | 0,61  | 0,165722 |
| Tcp11l2   | 1,05E-05 | -0,11412 | 0,235 | 0,365 | 0,165783 |
| BC051226  | 1,05E-05 | -0,07845 | 0,116 | 0,224 | 0,166282 |
| Kif3c     | 1,06E-05 | -0,10119 | 0,464 | 0,616 | 0,166855 |
| Srsf4     | 1,06E-05 | -0,12142 | 0,297 | 0,437 | 0,16689  |
| Bod1      | 1,06E-05 | -0,1044  | 0,396 | 0,555 | 0,167141 |
| Cox7a2l   | 1,06E-05 | -0,13448 | 0,749 | 0,827 | 0,16741  |
| Cd47      | 1,07E-05 | -0,10398 | 0,982 | 0,989 | 0,168514 |
| 6430573F1 | 1,07E-05 | -0,05729 | 0,018 | 0,076 | 0,169191 |
| Nr2c2ap   | 1,07E-05 | -0,09259 | 0,328 | 0,483 | 0,169305 |
| Gatd1     | 1,07E-05 | -0,1003  | 0,25  | 0,384 | 0,16946  |
| Ubl4a     | 1,08E-05 | -0,10071 | 0,202 | 0,329 | 0,169838 |

|           |          |          |       |       |          |
|-----------|----------|----------|-------|-------|----------|
| Sf3a3     | 1,08E-05 | -0,09996 | 0,334 | 0,479 | 0,170889 |
| Arpin     | 1,09E-05 | -0,08698 | 0,092 | 0,188 | 0,171425 |
| Spred2    | 1,09E-05 | -0,06625 | 0,068 | 0,156 | 0,17178  |
| Polr2j    | 1,1E-05  | -0,11284 | 0,589 | 0,747 | 0,173942 |
| Wdr45     | 1,12E-05 | -0,09662 | 0,286 | 0,432 | 0,176206 |
| Crebrf    | 1,12E-05 | 0,183649 | 0,774 | 0,69  | 0,176875 |
| Rasa3     | 1,13E-05 | 0,171858 | 0,782 | 0,736 | 0,177646 |
| Ldah      | 1,13E-05 | -0,14717 | 0,648 | 0,759 | 0,178029 |
| Ptpn14    | 1,13E-05 | 0,119755 | 0,068 | 0,013 | 0,178159 |
| Slk       | 1,15E-05 | 0,214505 | 0,772 | 0,698 | 0,180702 |
| Prr18     | 1,16E-05 | 0,18413  | 0,897 | 0,838 | 0,182728 |
| Ywhag     | 1,16E-05 | 0,177517 | 0,745 | 0,66  | 0,183203 |
| Arfp1     | 1,17E-05 | -0,11083 | 0,264 | 0,399 | 0,184433 |
| Asphd2    | 1,17E-05 | -0,09338 | 0,079 | 0,169 | 0,184698 |
| Nabp2     | 1,18E-05 | -0,11079 | 0,65  | 0,766 | 0,18591  |
| Alkbh6    | 1,19E-05 | -0,10012 | 0,194 | 0,316 | 0,187051 |
| Ctu2      | 1,19E-05 | -0,08242 | 0,128 | 0,236 | 0,187726 |
| Retsat    | 1,19E-05 | -0,0764  | 0,07  | 0,156 | 0,18792  |
| Fam114a2  | 1,2E-05  | -0,09824 | 0,406 | 0,563 | 0,189032 |
| Sh3bgrl   | 1,2E-05  | -0,10679 | 0,253 | 0,392 | 0,189722 |
| Lmbr1     | 1,21E-05 | -0,10048 | 0,161 | 0,276 | 0,190205 |
| Rgmb      | 1,21E-05 | -0,12937 | 0,257 | 0,392 | 0,190284 |
| Phlda3    | 1,21E-05 | -0,13119 | 0,901 | 0,924 | 0,190329 |
| Mrps15    | 1,21E-05 | -0,10076 | 0,402 | 0,574 | 0,191244 |
| Tbcb      | 1,22E-05 | -0,10793 | 0,817 | 0,909 | 0,192468 |
| Dusp28    | 1,23E-05 | -0,07999 | 0,09  | 0,186 | 0,194465 |
| Taok3     | 1,24E-05 | -0,09639 | 0,426 | 0,599 | 0,194974 |
| Rpf2      | 1,24E-05 | -0,10367 | 0,163 | 0,278 | 0,195154 |
| Tdrd6     | 1,24E-05 | -0,07874 | 0,051 | 0,129 | 0,195295 |
| Hltf      | 1,24E-05 | -0,10238 | 0,334 | 0,489 | 0,196317 |
| Zkscan14  | 1,25E-05 | -0,06726 | 0,077 | 0,169 | 0,197093 |
| Scg3      | 1,25E-05 | -0,07993 | 0,116 | 0,222 | 0,197954 |
| Ccdc90b   | 1,26E-05 | -0,09653 | 0,22  | 0,354 | 0,198287 |
| Zfp579    | 1,26E-05 | -0,12654 | 0,328 | 0,481 | 0,198667 |
| 1600014C: | 1,26E-05 | -0,0843  | 0,079 | 0,169 | 0,198674 |
| Gm17018   | 1,26E-05 | -0,08814 | 0,262 | 0,405 | 0,198911 |
| Ctnnbl1   | 1,26E-05 | -0,09349 | 0,178 | 0,3   | 0,199316 |
| Gna12     | 1,26E-05 | 0,140303 | 0,998 | 0,996 | 0,199473 |
| Marc2     | 1,27E-05 | -0,10483 | 0,459 | 0,61  | 0,200968 |
| Gclm      | 1,29E-05 | -0,13625 | 0,785 | 0,878 | 0,20391  |
| Gm16740   | 1,3E-05  | -0,06298 | 0,02  | 0,078 | 0,205671 |
| Lrrfip2   | 1,31E-05 | -0,10251 | 0,316 | 0,47  | 0,206076 |
| Wrap53    | 1,31E-05 | -0,10848 | 0,36  | 0,525 | 0,206519 |
| Hadh      | 1,32E-05 | -0,09621 | 0,728 | 0,844 | 0,208328 |
| AC161376. | 1,33E-05 | -0,12214 | 0,204 | 0,325 | 0,209243 |
| Scn1b     | 1,33E-05 | 0,139524 | 0,217 | 0,116 | 0,209366 |
| Dhx35     | 1,33E-05 | -0,0508  | 0,022 | 0,082 | 0,210546 |
| Rnf219    | 1,34E-05 | -0,07009 | 0,055 | 0,135 | 0,211986 |
| Rhbdl2    | 1,35E-05 | -0,06129 | 0,035 | 0,103 | 0,212382 |
| Gtf3a     | 1,35E-05 | -0,09935 | 0,417 | 0,582 | 0,212624 |
| Svip      | 1,35E-05 | -0,13711 | 0,631 | 0,755 | 0,212649 |
| Rpl7a     | 1,35E-05 | -0,11441 | 0,972 | 0,97  | 0,212769 |

|          |          |          |       |       |          |
|----------|----------|----------|-------|-------|----------|
| Hist3h2a | 1,35E-05 | -0,12053 | 0,295 | 0,439 | 0,212995 |
| Il1rapl1 | 1,36E-05 | -0,12316 | 0,108 | 0,205 | 0,214278 |
| Echdc1   | 1,38E-05 | -0,10721 | 0,305 | 0,449 | 0,217011 |
| Nedd9    | 1,38E-05 | -0,0685  | 0,053 | 0,133 | 0,218074 |
| Tmem246  | 1,39E-05 | -0,08036 | 0,305 | 0,466 | 0,218581 |
| Defb47   | 1,39E-05 | -0,04991 | 0,006 | 0,049 | 0,218947 |
| Rbmxl1   | 1,4E-05  | -0,09812 | 0,317 | 0,464 | 0,221381 |
| Cwf19l2  | 1,41E-05 | -0,10506 | 0,406 | 0,561 | 0,222432 |
| Ptprm    | 1,41E-05 | -0,08988 | 0,143 | 0,257 | 0,222451 |
| Mpzl1    | 1,43E-05 | 0,246593 | 0,728 | 0,671 | 0,225478 |
| Adprhl2  | 1,43E-05 | -0,08498 | 0,261 | 0,405 | 0,225496 |
| Ash2l    | 1,44E-05 | -0,10189 | 0,323 | 0,47  | 0,227043 |
| Gnaq     | 1,45E-05 | 0,184351 | 0,804 | 0,768 | 0,22863  |
| Fbxo8    | 1,45E-05 | -0,10589 | 0,321 | 0,483 | 0,228965 |
| Notch1   | 1,45E-05 | 0,110845 | 0,11  | 0,038 | 0,229113 |
| Pex11b   | 1,45E-05 | -0,09834 | 0,218 | 0,346 | 0,229189 |
| Gls      | 1,45E-05 | 0,24146  | 0,556 | 0,489 | 0,229243 |
| Dtd2     | 1,46E-05 | -0,0915  | 0,218 | 0,348 | 0,230135 |
| Yeats4   | 1,49E-05 | -0,09375 | 0,193 | 0,316 | 0,234398 |
| Rdh14    | 1,5E-05  | -0,09838 | 0,174 | 0,293 | 0,236982 |
| Nubp1    | 1,52E-05 | -0,07996 | 0,119 | 0,224 | 0,240013 |
| Mfsd2a   | 1,52E-05 | -0,08783 | 0,05  | 0,124 | 0,240087 |
| Scoc     | 1,53E-05 | -0,13132 | 0,771 | 0,861 | 0,240839 |
| Ccdc32   | 1,57E-05 | -0,10627 | 0,218 | 0,338 | 0,246924 |
| Bola2    | 1,58E-05 | -0,10181 | 0,648 | 0,781 | 0,248496 |
| Nsun6    | 1,58E-05 | -0,08798 | 0,196 | 0,325 | 0,249851 |
| Phf5a    | 1,58E-05 | -0,12131 | 0,609 | 0,732 | 0,249853 |
| Gatad2b  | 1,59E-05 | 0,223291 | 0,798 | 0,745 | 0,250816 |
| Nfkbib   | 1,59E-05 | -0,09185 | 0,235 | 0,367 | 0,251438 |
| Mtfr1l   | 1,61E-05 | -0,13433 | 0,499 | 0,624 | 0,253372 |
| Bcat1    | 1,61E-05 | -0,1176  | 0,281 | 0,424 | 0,25361  |
| Setd6    | 1,61E-05 | -0,08712 | 0,07  | 0,154 | 0,254335 |
| Zgpat    | 1,61E-05 | -0,09412 | 0,134 | 0,241 | 0,254394 |
| Gtf2f2   | 1,62E-05 | -0,09609 | 0,224 | 0,35  | 0,255345 |
| Ntpcr    | 1,63E-05 | -0,08985 | 0,143 | 0,253 | 0,257051 |
| Arl6ip1  | 1,65E-05 | -0,10937 | 0,985 | 0,998 | 0,25959  |
| Ccdc124  | 1,65E-05 | -0,11062 | 0,528 | 0,681 | 0,259923 |
| Mrps11   | 1,65E-05 | -0,10306 | 0,261 | 0,39  | 0,259952 |
| Eral1    | 1,65E-05 | -0,08811 | 0,086 | 0,177 | 0,260482 |
| Tusc3    | 1,65E-05 | -0,09374 | 0,128 | 0,232 | 0,261016 |
| Camk2d   | 1,66E-05 | 0,179959 | 0,281 | 0,175 | 0,261588 |
| Rabepk   | 1,66E-05 | -0,09144 | 0,106 | 0,205 | 0,261871 |
| Kiz      | 1,68E-05 | -0,1     | 0,189 | 0,308 | 0,264963 |
| Acox1    | 1,69E-05 | 0,208788 | 0,675 | 0,639 | 0,266431 |
| Eif2s2   | 1,69E-05 | -0,10944 | 0,972 | 0,981 | 0,267215 |
| Mark1    | 1,7E-05  | -0,10315 | 0,105 | 0,2   | 0,267845 |
| Gcdh     | 1,7E-05  | -0,09774 | 0,176 | 0,293 | 0,267957 |
| Mcrip2   | 1,7E-05  | -0,06653 | 0,057 | 0,137 | 0,268348 |
| Pdik1l   | 1,7E-05  | -0,09103 | 0,125 | 0,228 | 0,268427 |
| Dlat     | 1,7E-05  | -0,09978 | 0,206 | 0,331 | 0,268458 |
| Gamt     | 1,71E-05 | -0,16727 | 0,833 | 0,888 | 0,269989 |
| Tjap1    | 1,74E-05 | -0,11812 | 0,376 | 0,519 | 0,273876 |

|           |          |          |       |       |          |
|-----------|----------|----------|-------|-------|----------|
| Tmem106k  | 1,74E-05 | -0,12203 | 0,727 | 0,827 | 0,273963 |
| Gm9945    | 1,75E-05 | -0,10103 | 0,207 | 0,333 | 0,275517 |
| Cic       | 1,75E-05 | 0,201208 | 0,554 | 0,487 | 0,276019 |
| Bcap31    | 1,76E-05 | -0,11937 | 0,914 | 0,947 | 0,277586 |
| Tex2      | 1,77E-05 | 0,187907 | 0,716 | 0,669 | 0,278877 |
| Acot11    | 1,78E-05 | 0,133174 | 0,183 | 0,093 | 0,280443 |
| Ptprd     | 1,78E-05 | -0,0869  | 1     | 0,996 | 0,28049  |
| Vrk1      | 1,78E-05 | -0,08215 | 0,139 | 0,249 | 0,281224 |
| Phyh      | 1,79E-05 | -0,11597 | 0,393 | 0,546 | 0,28296  |
| Slc43a2   | 1,8E-05  | -0,09785 | 0,552 | 0,726 | 0,283656 |
| Limch1    | 1,8E-05  | 0,12571  | 0,987 | 0,964 | 0,283771 |
| Tirap     | 1,8E-05  | -0,09708 | 0,196 | 0,321 | 0,284462 |
| Dennd1c   | 1,81E-05 | 0,088167 | 0,053 | 0,006 | 0,284838 |
| Adpgk     | 1,81E-05 | -0,08627 | 0,163 | 0,278 | 0,286048 |
| Snrpa1    | 1,84E-05 | -0,10444 | 0,25  | 0,382 | 0,289572 |
| C77080    | 1,84E-05 | 0,061092 | 0,053 | 0,006 | 0,290121 |
| 4732471JC | 1,85E-05 | -0,08313 | 0,064 | 0,146 | 0,291573 |
| Me2       | 1,85E-05 | -0,10073 | 0,284 | 0,422 | 0,292423 |
| Elp5      | 1,85E-05 | -0,0754  | 0,248 | 0,388 | 0,292573 |
| St7l      | 1,86E-05 | -0,10203 | 0,51  | 0,677 | 0,29395  |
| Mrpl12    | 1,88E-05 | -0,09666 | 0,501 | 0,671 | 0,296357 |
| Foxn2     | 1,91E-05 | -0,11056 | 0,327 | 0,475 | 0,300744 |
| Asb3      | 1,92E-05 | -0,08804 | 0,141 | 0,249 | 0,303685 |
| 1700019Dl | 1,93E-05 | -0,07854 | 0,088 | 0,181 | 0,304253 |
| Rps19bp1  | 1,93E-05 | -0,10052 | 0,283 | 0,424 | 0,304479 |
| Zfp780b   | 1,94E-05 | -0,09722 | 0,154 | 0,264 | 0,30528  |
| Sox4      | 1,94E-05 | 0,22776  | 0,172 | 0,082 | 0,306799 |
| Ttll5     | 1,95E-05 | -0,12011 | 0,336 | 0,477 | 0,308011 |
| Adprm     | 1,95E-05 | -0,08667 | 0,125 | 0,228 | 0,308023 |
| Spsb1     | 1,96E-05 | 0,190416 | 0,607 | 0,555 | 0,309001 |
| Chid1     | 1,96E-05 | -0,09048 | 0,152 | 0,264 | 0,309033 |
| Spg11     | 1,97E-05 | -0,09663 | 0,163 | 0,278 | 0,310252 |
| Pgbd5     | 1,97E-05 | -0,07302 | 0,272 | 0,422 | 0,31155  |
| Rapgef5   | 1,98E-05 | -0,2043  | 0,378 | 0,502 | 0,312561 |
| Magohb    | 1,98E-05 | -0,08653 | 0,094 | 0,186 | 0,312982 |
| G6pdx     | 1,99E-05 | -0,10908 | 0,312 | 0,449 | 0,313982 |
| Orc2      | 1,99E-05 | -0,11016 | 0,213 | 0,333 | 0,314029 |
| Eif3h     | 1,99E-05 | -0,0964  | 0,756 | 0,857 | 0,314662 |
| Zbtb11os1 | 2,01E-05 | -0,14111 | 0,149 | 0,251 | 0,31721  |
| Dnajc4    | 2,01E-05 | -0,09683 | 0,213 | 0,338 | 0,317379 |
| Slc25a10  | 2,02E-05 | -0,11577 | 0,187 | 0,3   | 0,318027 |
| Fbxl12    | 2,03E-05 | -0,06638 | 0,167 | 0,291 | 0,319645 |
| Gm4221    | 2,03E-05 | -0,05734 | 0,033 | 0,099 | 0,319652 |
| Sox2      | 2,03E-05 | 0,378299 | 0,778 | 0,722 | 0,320833 |
| Abcb8     | 2,05E-05 | -0,16286 | 0,347 | 0,487 | 0,323481 |
| Ldb3      | 2,06E-05 | -0,12163 | 0,215 | 0,338 | 0,324287 |
| Tyrobp    | 2,06E-05 | -0,04644 | 0,011 | 0,059 | 0,324405 |
| Prorsd1   | 2,06E-05 | -0,09235 | 0,095 | 0,188 | 0,325428 |
| Spcs3     | 2,07E-05 | -0,10951 | 0,244 | 0,369 | 0,326179 |
| Snx24     | 2,07E-05 | -0,10016 | 0,319 | 0,466 | 0,32714  |
| RbmX      | 2,1E-05  | -0,0876  | 0,422 | 0,58  | 0,331233 |
| Dnajb9    | 2,1E-05  | -0,08281 | 0,411 | 0,578 | 0,331563 |

|          |          |          |       |       |          |
|----------|----------|----------|-------|-------|----------|
| Vsnl1    | 2,12E-05 | -0,0395  | 0,002 | 0,038 | 0,334004 |
| Sh2b2    | 2,12E-05 | -0,03747 | 0,002 | 0,038 | 0,334635 |
| Cbll1    | 2,13E-05 | -0,11599 | 0,295 | 0,43  | 0,335727 |
| Gpld1    | 2,14E-05 | -0,07615 | 0,075 | 0,162 | 0,337521 |
| Pdgfc    | 2,15E-05 | -0,05502 | 0,017 | 0,07  | 0,33882  |
| Taf9b    | 2,15E-05 | -0,10188 | 0,42  | 0,576 | 0,339751 |
| Mrps18b  | 2,16E-05 | -0,09525 | 0,279 | 0,422 | 0,340074 |
| Mynn     | 2,18E-05 | -0,08505 | 0,22  | 0,352 | 0,343285 |
| Alkbh7   | 2,18E-05 | -0,0905  | 0,209 | 0,333 | 0,344347 |
| Erf      | 2,19E-05 | 0,223584 | 0,417 | 0,323 | 0,345541 |
| Hgsnat   | 2,2E-05  | -0,08449 | 0,218 | 0,35  | 0,346341 |
| Tubg2    | 2,2E-05  | -0,05704 | 0,035 | 0,101 | 0,346803 |
| Elp6     | 2,2E-05  | -0,09784 | 0,141 | 0,247 | 0,346918 |
| Mpped2   | 2,2E-05  | -0,09157 | 0,048 | 0,12  | 0,347744 |
| Rps19    | 2,21E-05 | 0,180589 | 0,985 | 0,97  | 0,348327 |
| Phf3     | 2,21E-05 | 0,165454 | 0,851 | 0,819 | 0,349091 |
| Otud7a   | 2,22E-05 | -0,10257 | 0,136 | 0,238 | 0,350351 |
| Lrp11    | 2,22E-05 | -0,04481 | 0,011 | 0,059 | 0,350529 |
| Rbfa     | 2,23E-05 | -0,08352 | 0,206 | 0,333 | 0,351345 |
| Lrrfip1  | 2,25E-05 | 0,07343  | 0,048 | 0,004 | 0,354415 |
| Dirc2    | 2,25E-05 | -0,09854 | 0,444 | 0,62  | 0,35521  |
| Utp11    | 2,28E-05 | -0,08199 | 0,437 | 0,612 | 0,359499 |
| Hsph1    | 2,28E-05 | -0,07856 | 0,473 | 0,608 | 0,360289 |
| Gmn      | 2,3E-05  | -0,07644 | 0,04  | 0,11  | 0,362134 |
| Gpr37    | 2,3E-05  | -0,09726 | 1     | 0,998 | 0,36243  |
| Cox11    | 2,32E-05 | -0,0717  | 0,059 | 0,137 | 0,366759 |
| Bclaf1   | 2,35E-05 | 0,200632 | 0,815 | 0,793 | 0,370394 |
| Gtf2h5   | 2,35E-05 | -0,09603 | 0,71  | 0,823 | 0,370412 |
| Tmsb15b1 | 2,38E-05 | -0,06304 | 0,035 | 0,101 | 0,374857 |
| Vezf1    | 2,39E-05 | 0,197657 | 0,772 | 0,719 | 0,37762  |
| Cfap36   | 2,4E-05  | -0,12021 | 0,563 | 0,696 | 0,379129 |
| Gm49359  | 2,42E-05 | -0,07107 | 0,066 | 0,148 | 0,38255  |
| Rnf208   | 2,44E-05 | -0,13377 | 0,341 | 0,479 | 0,384665 |
| Ypel2    | 2,45E-05 | 0,161612 | 0,985 | 0,956 | 0,387246 |
| Slc25a45 | 2,46E-05 | -0,07012 | 0,094 | 0,188 | 0,387713 |
| Sel1l3   | 2,47E-05 | -0,09385 | 0,084 | 0,173 | 0,389448 |
| Zfp825   | 2,5E-05  | -0,06888 | 0,057 | 0,135 | 0,394713 |
| Tfpt     | 2,52E-05 | -0,10275 | 0,255 | 0,382 | 0,398037 |
| Tsnax    | 2,53E-05 | -0,09117 | 0,417 | 0,595 | 0,398799 |
| Msh2     | 2,53E-05 | -0,0844  | 0,154 | 0,268 | 0,399449 |
| Smarcc2  | 2,54E-05 | 0,194682 | 0,771 | 0,717 | 0,399967 |
| Gm13546  | 2,54E-05 | -0,04591 | 0,006 | 0,046 | 0,400314 |
| Ttll3    | 2,54E-05 | -0,06111 | 0,05  | 0,124 | 0,40073  |
| Kctd21   | 2,54E-05 | -0,06855 | 0,079 | 0,167 | 0,400733 |
| Mrpl9    | 2,55E-05 | -0,07368 | 0,343 | 0,502 | 0,402288 |
| Nit1     | 2,56E-05 | -0,09656 | 0,343 | 0,494 | 0,404203 |
| Mterf1a  | 2,56E-05 | -0,07426 | 0,081 | 0,169 | 0,404267 |
| Maoa     | 2,57E-05 | -0,10158 | 0,394 | 0,555 | 0,40496  |
| Ccm2     | 2,57E-05 | -0,09093 | 0,22  | 0,344 | 0,40597  |
| Fam32a   | 2,59E-05 | -0,1194  | 0,376 | 0,519 | 0,407885 |
| Zfp386   | 2,59E-05 | -0,09616 | 0,161 | 0,272 | 0,408963 |
| Aldh5a1  | 2,62E-05 | -0,09056 | 0,143 | 0,253 | 0,412947 |



|           |          |          |       |       |          |
|-----------|----------|----------|-------|-------|----------|
| Mrps18a   | 2,65E-05 | -0,09791 | 0,466 | 0,631 | 0,418406 |
| Ift22     | 2,7E-05  | -0,11472 | 0,312 | 0,445 | 0,425293 |
| Txn2      | 2,72E-05 | -0,11228 | 0,62  | 0,747 | 0,428853 |
| Pusl1     | 2,74E-05 | -0,08314 | 0,161 | 0,274 | 0,432593 |
| Clasrp    | 2,74E-05 | -0,09653 | 0,468 | 0,635 | 0,4329   |
| Ebpl      | 2,75E-05 | -0,12302 | 0,517 | 0,667 | 0,433677 |
| Tmem126b  | 2,75E-05 | -0,08172 | 0,18  | 0,297 | 0,434276 |
| Stx3      | 2,76E-05 | 0,134485 | 0,2   | 0,108 | 0,434735 |
| Irgm2     | 2,77E-05 | 0,151204 | 0,072 | 0,017 | 0,437123 |
| Apip      | 2,79E-05 | -0,09946 | 0,224 | 0,35  | 0,440603 |
| 2810001G  | 2,83E-05 | -0,07526 | 0,077 | 0,162 | 0,447122 |
| Pmpcb     | 2,85E-05 | -0,08803 | 0,36  | 0,519 | 0,449644 |
| Adamts4   | 2,86E-05 | 0,18192  | 0,936 | 0,895 | 0,450695 |
| Metap2    | 2,86E-05 | -0,09662 | 0,919 | 0,947 | 0,451504 |
| Aaed1     | 2,88E-05 | -0,08455 | 0,211 | 0,335 | 0,453841 |
| Cyp4f13   | 2,88E-05 | -0,08479 | 0,218 | 0,34  | 0,453977 |
| Tmem101   | 2,88E-05 | -0,10184 | 0,422 | 0,586 | 0,454065 |
| Ube2f     | 2,9E-05  | -0,10294 | 0,218 | 0,34  | 0,457191 |
| Sst       | 2,9E-05  | -0,03116 | 0     | 0,032 | 0,457315 |
| AI987944  | 2,91E-05 | -0,0833  | 0,224 | 0,354 | 0,458529 |
| Nlrc5     | 2,91E-05 | 0,082735 | 0,072 | 0,017 | 0,459045 |
| Trappc6b  | 2,91E-05 | -0,07611 | 0,328 | 0,481 | 0,459549 |
| Timm22    | 2,92E-05 | -0,07427 | 0,35  | 0,517 | 0,459976 |
| Ralgds    | 2,93E-05 | 0,142776 | 0,961 | 0,909 | 0,46247  |
| Reep5     | 2,94E-05 | -0,13344 | 0,976 | 0,956 | 0,464065 |
| Plagl1    | 2,94E-05 | -0,08586 | 0,119 | 0,219 | 0,464242 |
| Itgad     | 2,95E-05 | -0,0783  | 0,039 | 0,105 | 0,464839 |
| Cnpy2     | 2,96E-05 | -0,10231 | 0,538 | 0,69  | 0,466625 |
| Cd151     | 2,96E-05 | 0,151714 | 0,235 | 0,139 | 0,46679  |
| Uty       | 2,97E-05 | -0,08948 | 0,095 | 0,188 | 0,468088 |
| Stag1     | 3,02E-05 | 0,203078 | 0,516 | 0,428 | 0,47632  |
| Ranbp2    | 3,02E-05 | 0,191662 | 0,618 | 0,54  | 0,477124 |
| 2900093K  | 3,03E-05 | -0,08464 | 0,132 | 0,234 | 0,477359 |
| Aar2      | 3,04E-05 | -0,08528 | 0,239 | 0,369 | 0,479728 |
| Slc25a29  | 3,06E-05 | -0,10245 | 0,136 | 0,236 | 0,483402 |
| Rbp1      | 3,07E-05 | 0,061265 | 0,101 | 0,034 | 0,484354 |
| Timm50    | 3,08E-05 | -0,10293 | 0,312 | 0,449 | 0,48606  |
| Aimp1     | 3,12E-05 | -0,1036  | 0,683 | 0,797 | 0,491913 |
| Napepld   | 3,12E-05 | -0,07049 | 0,246 | 0,388 | 0,492116 |
| Carf      | 3,12E-05 | -0,08037 | 0,139 | 0,247 | 0,492482 |
| 2210408I2 | 3,13E-05 | -0,06875 | 0,061 | 0,139 | 0,493275 |
| Iars2     | 3,13E-05 | -0,0866  | 0,215 | 0,342 | 0,494297 |
| Ddx59     | 3,14E-05 | -0,08252 | 0,084 | 0,171 | 0,494777 |
| Lbr       | 3,15E-05 | -0,09953 | 0,462 | 0,614 | 0,497285 |
| Msantd3   | 3,16E-05 | -0,07885 | 0,083 | 0,169 | 0,49861  |
| Fosl2     | 3,17E-05 | 0,151457 | 0,165 | 0,082 | 0,499342 |
| BC028528  | 3,17E-05 | -0,09004 | 0,086 | 0,173 | 0,49975  |
| Snrpg     | 3,22E-05 | -0,10951 | 0,686 | 0,77  | 0,508429 |
| Pmm1      | 3,23E-05 | -0,12885 | 0,583 | 0,705 | 0,509283 |
| Clcn6     | 3,26E-05 | 0,208292 | 0,567 | 0,506 | 0,514555 |
| Haus1     | 3,29E-05 | -0,07428 | 0,11  | 0,207 | 0,518352 |
| Zfc3h1    | 3,29E-05 | -0,09306 | 0,292 | 0,424 | 0,519568 |

|           |          |          |       |       |          |
|-----------|----------|----------|-------|-------|----------|
| Purg      | 3,29E-05 | -0,07675 | 0,123 | 0,224 | 0,519685 |
| Snrnp35   | 3,33E-05 | -0,08473 | 0,134 | 0,238 | 0,525222 |
| Ino80b    | 3,36E-05 | -0,09508 | 0,472 | 0,629 | 0,530424 |
| Ier3ip1   | 3,37E-05 | -0,1112  | 0,569 | 0,724 | 0,53096  |
| Entpd5    | 3,38E-05 | -0,12838 | 0,479 | 0,622 | 0,532528 |
| Psmg1     | 3,39E-05 | -0,10719 | 0,174 | 0,283 | 0,534489 |
| Ino80c    | 3,4E-05  | -0,09363 | 0,174 | 0,287 | 0,535844 |
| Stat1     | 3,4E-05  | 0,451123 | 0,371 | 0,289 | 0,536324 |
| Abhd14a   | 3,41E-05 | -0,10362 | 0,415 | 0,572 | 0,537527 |
| Eif2b1    | 3,43E-05 | -0,08242 | 0,22  | 0,348 | 0,540746 |
| Gria4     | 3,44E-05 | -0,09791 | 0,224 | 0,348 | 0,542312 |
| Snapin    | 3,44E-05 | -0,1084  | 0,82  | 0,892 | 0,542438 |
| Ece1      | 3,44E-05 | -0,06071 | 0,026 | 0,084 | 0,542633 |
| Llph      | 3,46E-05 | -0,10582 | 0,501 | 0,675 | 0,545968 |
| Ptpdc1    | 3,46E-05 | -0,10776 | 0,429 | 0,568 | 0,546269 |
| Ubxn8     | 3,47E-05 | -0,0924  | 0,152 | 0,259 | 0,547343 |
| Mgat5     | 3,47E-05 | -0,07943 | 0,136 | 0,243 | 0,547429 |
| Ndufaf7   | 3,47E-05 | -0,06558 | 0,215 | 0,346 | 0,548212 |
| Nppc      | 3,49E-05 | -0,10622 | 0,116 | 0,213 | 0,550588 |
| Dus2      | 3,51E-05 | -0,07319 | 0,191 | 0,314 | 0,554107 |
| Cope      | 3,51E-05 | -0,12791 | 0,754 | 0,835 | 0,554301 |
| Nuak1     | 3,52E-05 | 0,229246 | 0,494 | 0,405 | 0,555786 |
| Lyrn1     | 3,53E-05 | -0,07615 | 0,088 | 0,177 | 0,556881 |
| Ascc1     | 3,55E-05 | -0,08487 | 0,202 | 0,325 | 0,559472 |
| Emg1      | 3,55E-05 | -0,08658 | 0,358 | 0,513 | 0,56003  |
| Gm816     | 3,55E-05 | -0,0524  | 0,011 | 0,057 | 0,56017  |
| Exosc8    | 3,56E-05 | -0,0959  | 0,237 | 0,359 | 0,561208 |
| Prrg2     | 3,58E-05 | -0,08614 | 0,11  | 0,205 | 0,565226 |
| Fam98a    | 3,61E-05 | -0,12527 | 0,411 | 0,565 | 0,569463 |
| Hepacam   | 3,64E-05 | -0,12101 | 0,934 | 0,964 | 0,573515 |
| Nipal4    | 3,65E-05 | -0,12469 | 0,521 | 0,662 | 0,575937 |
| Pdcd6ip   | 3,69E-05 | 0,178875 | 0,765 | 0,724 | 0,581993 |
| Faf2      | 3,69E-05 | -0,07446 | 0,409 | 0,597 | 0,582877 |
| Vps45     | 3,7E-05  | -0,09334 | 0,196 | 0,314 | 0,583274 |
| Mmp15     | 3,7E-05  | -0,09329 | 0,094 | 0,184 | 0,583559 |
| Ccdc130   | 3,7E-05  | -0,07865 | 0,103 | 0,196 | 0,584101 |
| Hsp90aa1  | 3,73E-05 | -0,0748  | 1     | 0,998 | 0,587773 |
| Tnik      | 3,73E-05 | -0,09638 | 0,172 | 0,287 | 0,587827 |
| Eepd1     | 3,74E-05 | -0,06345 | 0,04  | 0,108 | 0,589302 |
| Adi1      | 3,75E-05 | -0,13214 | 0,767 | 0,819 | 0,591776 |
| Sox8      | 3,75E-05 | 0,206935 | 0,895 | 0,869 | 0,592061 |
| Tada3     | 3,76E-05 | -0,09554 | 0,288 | 0,426 | 0,592465 |
| Crtac1    | 3,76E-05 | 0,260899 | 0,371 | 0,278 | 0,593543 |
| Dach2     | 3,76E-05 | -0,06312 | 0,02  | 0,074 | 0,593815 |
| Polr3d    | 3,77E-05 | -0,09371 | 0,306 | 0,441 | 0,595151 |
| Fbxl6     | 3,78E-05 | -0,06635 | 0,095 | 0,188 | 0,596697 |
| Sema6d    | 3,81E-05 | 0,243658 | 0,703 | 0,603 | 0,601407 |
| Cadm2     | 3,82E-05 | -0,11649 | 0,525 | 0,665 | 0,602393 |
| Dennd6b   | 3,82E-05 | -0,09453 | 0,108 | 0,2   | 0,603307 |
| Arfp2     | 3,82E-05 | -0,09906 | 0,354 | 0,498 | 0,603421 |
| Alg5      | 3,84E-05 | -0,07903 | 0,294 | 0,441 | 0,605664 |
| 1500015L2 | 3,84E-05 | -0,07413 | 0,061 | 0,137 | 0,606547 |

|           |          |          |       |       |          |
|-----------|----------|----------|-------|-------|----------|
| Fuz       | 3,89E-05 | -0,08116 | 0,152 | 0,259 | 0,613086 |
| BC002059  | 3,92E-05 | -0,05165 | 0,061 | 0,139 | 0,617864 |
| Prrg1     | 3,92E-05 | -0,10727 | 0,486 | 0,637 | 0,618049 |
| Plppr3    | 3,92E-05 | 0,088804 | 0,105 | 0,038 | 0,618712 |
| 4632415LC | 3,92E-05 | -0,10055 | 0,127 | 0,224 | 0,619151 |
| Gm29825   | 3,93E-05 | -0,03747 | 0,002 | 0,036 | 0,6198   |
| Gm19705   | 3,96E-05 | -0,07988 | 0,088 | 0,175 | 0,624153 |
| Med29     | 3,96E-05 | -0,08608 | 0,314 | 0,46  | 0,625106 |
| Lnpep     | 3,98E-05 | 0,157763 | 0,664 | 0,582 | 0,628433 |
| Nagpa     | 3,99E-05 | -0,07895 | 0,222 | 0,35  | 0,628828 |
| Cdr2l     | 3,99E-05 | -0,08321 | 0,365 | 0,521 | 0,629932 |
| Trmt5     | 4E-05    | -0,06332 | 0,048 | 0,118 | 0,630285 |
| Fabp7     | 4E-05    | -0,03422 | 0,011 | 0,057 | 0,630792 |
| 2210011C: | 4E-05    | -0,06845 | 0,031 | 0,093 | 0,631818 |
| Myof      | 4,01E-05 | 0,141625 | 0,194 | 0,103 | 0,632663 |
| Tubg1     | 4,02E-05 | -0,10012 | 0,196 | 0,308 | 0,633705 |
| Rad17     | 4,09E-05 | -0,07192 | 0,237 | 0,371 | 0,645095 |
| Ube2g1    | 4,09E-05 | -0,11614 | 0,558 | 0,711 | 0,645168 |
| Dusp23    | 4,1E-05  | -0,10476 | 0,134 | 0,234 | 0,646716 |
| ldh3b     | 4,1E-05  | -0,09688 | 0,433 | 0,591 | 0,646914 |
| Hspg2     | 4,11E-05 | 0,064834 | 0,059 | 0,011 | 0,647608 |
| Mtg1      | 4,12E-05 | -0,07472 | 0,116 | 0,213 | 0,649837 |
| E4f1      | 4,13E-05 | -0,08384 | 0,163 | 0,274 | 0,650976 |
| Rrnad1    | 4,14E-05 | -0,08742 | 0,248 | 0,373 | 0,653349 |
| Mrpl21    | 4,15E-05 | -0,08601 | 0,299 | 0,443 | 0,654117 |
| Clgn      | 4,15E-05 | -0,16604 | 0,095 | 0,181 | 0,655093 |
| Zfp994    | 4,15E-05 | -0,07121 | 0,048 | 0,118 | 0,655121 |
| Fancl     | 4,16E-05 | -0,06913 | 0,066 | 0,146 | 0,656562 |
| Gm12258   | 4,17E-05 | -0,07046 | 0,061 | 0,137 | 0,657146 |
| Kcnk1     | 4,17E-05 | -0,05159 | 0,02  | 0,074 | 0,65747  |
| Midn      | 4,18E-05 | 0,108308 | 0,084 | 0,025 | 0,659499 |
| Mis12     | 4,28E-05 | -0,08251 | 0,143 | 0,249 | 0,674645 |
| Nasp      | 4,28E-05 | 0,245211 | 0,473 | 0,388 | 0,675843 |
| Eil2      | 4,32E-05 | -0,07235 | 0,358 | 0,513 | 0,681638 |
| Aacs      | 4,33E-05 | 0,248412 | 0,365 | 0,274 | 0,682576 |
| Adam9     | 4,33E-05 | 0,175503 | 0,585 | 0,515 | 0,683345 |
| Rmnd1     | 4,37E-05 | -0,11241 | 0,226 | 0,344 | 0,69014  |
| Amacr     | 4,38E-05 | -0,06387 | 0,048 | 0,118 | 0,690433 |
| Slc25a26  | 4,39E-05 | -0,08043 | 0,073 | 0,154 | 0,691827 |
| Pcgf5     | 4,4E-05  | -0,07716 | 0,105 | 0,198 | 0,694131 |
| Rad51b    | 4,4E-05  | -0,04878 | 0,015 | 0,063 | 0,694721 |
| Nim1k     | 4,42E-05 | 0,098013 | 0,066 | 0,015 | 0,696858 |
| Pole4     | 4,42E-05 | -0,09631 | 0,407 | 0,565 | 0,697679 |
| Lrrc4c    | 4,45E-05 | -0,08752 | 0,189 | 0,304 | 0,701387 |
| Csmd2     | 4,45E-05 | -0,08401 | 0,064 | 0,141 | 0,701706 |
| Naf1      | 4,45E-05 | -0,09032 | 0,261 | 0,388 | 0,702044 |
| Fh1       | 4,46E-05 | -0,09243 | 0,297 | 0,426 | 0,703246 |
| Mtf1      | 4,47E-05 | -0,10464 | 0,444 | 0,591 | 0,704489 |
| Rad1      | 4,5E-05  | -0,07932 | 0,196 | 0,314 | 0,710572 |
| Map4      | 4,51E-05 | 0,169366 | 0,824 | 0,776 | 0,71126  |
| Rhou      | 4,51E-05 | -0,12435 | 0,96  | 0,954 | 0,711738 |
| 1110059E2 | 4,53E-05 | -0,07965 | 0,233 | 0,363 | 0,715228 |

|          |          |          |       |       |          |
|----------|----------|----------|-------|-------|----------|
| Stam2    | 4,53E-05 | -0,07301 | 0,321 | 0,473 | 0,71528  |
| Dcaf17   | 4,54E-05 | -0,19957 | 0,763 | 0,842 | 0,716704 |
| Tgs1     | 4,56E-05 | -0,08863 | 0,383 | 0,536 | 0,719703 |
| Fam192a  | 4,56E-05 | -0,08154 | 0,389 | 0,549 | 0,720104 |
| Rev3l    | 4,57E-05 | -0,08744 | 0,237 | 0,367 | 0,721637 |
| Smc2     | 4,59E-05 | -0,08225 | 0,169 | 0,281 | 0,72337  |
| Kcnq1ot1 | 4,59E-05 | 0,322497 | 0,818 | 0,728 | 0,724058 |
| 06100090 | 4,6E-05  | -0,10749 | 0,29  | 0,418 | 0,725533 |
| Trmt13   | 4,61E-05 | -0,07472 | 0,317 | 0,46  | 0,727594 |
| Gtf3c3   | 4,63E-05 | -0,10354 | 0,18  | 0,293 | 0,730239 |
| Dnph1    | 4,63E-05 | -0,07539 | 0,059 | 0,133 | 0,731059 |
| As3mt    | 4,64E-05 | -0,09519 | 0,272 | 0,399 | 0,731251 |
| 9130401M | 4,66E-05 | -0,09986 | 0,24  | 0,365 | 0,734532 |
| Mroh7    | 4,72E-05 | 0,077335 | 0,073 | 0,019 | 0,743949 |
| Klf11    | 4,72E-05 | 0,136675 | 0,24  | 0,143 | 0,744184 |
| Pfkl     | 4,73E-05 | -0,07484 | 0,143 | 0,249 | 0,746209 |
| Tmem106c | 4,75E-05 | -0,10539 | 0,343 | 0,479 | 0,74874  |
| Gabra3   | 4,77E-05 | -0,04427 | 0,006 | 0,044 | 0,752823 |
| Dnajb4   | 4,79E-05 | -0,07059 | 0,352 | 0,511 | 0,755731 |
| Bptf     | 4,81E-05 | 0,144122 | 0,912 | 0,842 | 0,758686 |
| Denr     | 4,82E-05 | -0,10973 | 0,565 | 0,705 | 0,760263 |
| Hsd17b7  | 4,84E-05 | 0,25758  | 0,396 | 0,316 | 0,763292 |
| Mkrn3    | 4,86E-05 | -0,06414 | 0,05  | 0,12  | 0,76611  |
| Drg2     | 4,86E-05 | -0,09276 | 0,345 | 0,494 | 0,767466 |
| Cpe      | 4,89E-05 | 0,215986 | 0,635 | 0,551 | 0,77192  |
| Kdr      | 4,91E-05 | -0,0741  | 0,035 | 0,097 | 0,774178 |
| Rwdd4a   | 4,92E-05 | -0,08575 | 0,22  | 0,342 | 0,775472 |
| Sirt1    | 4,94E-05 | 0,160066 | 0,38  | 0,276 | 0,779875 |
| Abhd18   | 4,95E-05 | -0,04482 | 0,174 | 0,3   | 0,781357 |
| Tom1l2   | 4,97E-05 | 0,200081 | 0,629 | 0,58  | 0,783405 |
| Malsu1   | 4,97E-05 | -0,08671 | 0,257 | 0,388 | 0,783926 |
| Arsb     | 4,97E-05 | -0,07643 | 0,264 | 0,403 | 0,784509 |
| Tnks2    | 5,01E-05 | 0,153409 | 0,84  | 0,793 | 0,790586 |
| Dnajc9   | 5,01E-05 | -0,0987  | 0,264 | 0,395 | 0,790835 |
| Srprb    | 5,07E-05 | -0,06986 | 0,297 | 0,445 | 0,799362 |
| Ube3a    | 5,07E-05 | 0,164207 | 0,906 | 0,878 | 0,800364 |
| Gls2     | 5,09E-05 | -0,07734 | 0,061 | 0,135 | 0,802383 |
| Tomm40l  | 5,12E-05 | -0,098   | 0,178 | 0,287 | 0,807101 |
| lft27    | 5,12E-05 | -0,10025 | 0,303 | 0,437 | 0,807718 |
| Cwc25    | 5,14E-05 | -0,0774  | 0,255 | 0,395 | 0,810231 |
| Epb41l4b | 5,14E-05 | -0,09438 | 0,295 | 0,428 | 0,810802 |
| Amph     | 5,15E-05 | -0,08108 | 0,279 | 0,424 | 0,812453 |
| Unc5c    | 5,18E-05 | 0,202633 | 0,659 | 0,597 | 0,816599 |
| Oxnad1   | 5,19E-05 | -0,0899  | 0,119 | 0,213 | 0,819115 |
| Rnf152   | 5,21E-05 | 0,216015 | 0,209 | 0,122 | 0,821868 |
| Dguok    | 5,24E-05 | -0,09157 | 0,402 | 0,542 | 0,826164 |
| Sap30bp  | 5,27E-05 | -0,0881  | 0,363 | 0,511 | 0,831579 |
| Mif4gd   | 5,28E-05 | -0,11463 | 0,554 | 0,684 | 0,833253 |
| Rsrc2    | 5,28E-05 | 0,167294 | 0,912 | 0,861 | 0,833264 |
| Calr     | 5,29E-05 | -0,1226  | 0,983 | 0,977 | 0,834375 |
| Fam229b  | 5,31E-05 | -0,08837 | 0,116 | 0,209 | 0,837961 |
| Hspa2    | 5,31E-05 | 0,19298  | 0,475 | 0,371 | 0,83827  |

|           |          |          |       |       |          |
|-----------|----------|----------|-------|-------|----------|
| Kctd6     | 5,33E-05 | -0,08103 | 0,134 | 0,234 | 0,840291 |
| Vdac1     | 5,33E-05 | -0,12699 | 0,617 | 0,741 | 0,841221 |
| Atg14     | 5,34E-05 | -0,06964 | 0,182 | 0,3   | 0,842757 |
| Ficd      | 5,37E-05 | -0,0665  | 0,077 | 0,16  | 0,846765 |
| 4930522L1 | 5,37E-05 | -0,06107 | 0,072 | 0,152 | 0,84722  |
| Hjurp     | 5,37E-05 | -0,10062 | 0,273 | 0,403 | 0,84774  |
| Akr7a5    | 5,4E-05  | -0,09123 | 0,404 | 0,565 | 0,851905 |
| Smim4     | 5,45E-05 | -0,07993 | 0,134 | 0,234 | 0,859498 |
| Hip1      | 5,47E-05 | -0,13713 | 0,624 | 0,73  | 0,862843 |
| Gar1      | 5,48E-05 | -0,07377 | 0,248 | 0,38  | 0,864135 |
| Zfyve16   | 5,48E-05 | -0,08892 | 0,248 | 0,373 | 0,864771 |
| Sulf2     | 5,49E-05 | 0,174518 | 0,919 | 0,897 | 0,865682 |
| Snapc1    | 5,49E-05 | -0,11338 | 0,336 | 0,477 | 0,866267 |
| Lsg1      | 5,53E-05 | -0,06169 | 0,268 | 0,416 | 0,872646 |
| Syncrip   | 5,56E-05 | 0,216283 | 0,602 | 0,551 | 0,87693  |
| Stradb    | 5,58E-05 | -0,08069 | 0,103 | 0,192 | 0,880989 |
| Ufc1      | 5,59E-05 | -0,11421 | 0,578 | 0,713 | 0,881929 |
| Hdac3     | 5,62E-05 | -0,09192 | 0,233 | 0,354 | 0,886626 |
| Apln      | 5,7E-05  | -0,10869 | 0,312 | 0,447 | 0,899962 |
| Nip7      | 5,72E-05 | -0,07995 | 0,215 | 0,333 | 0,902117 |
| Usp25     | 5,76E-05 | -0,12976 | 0,51  | 0,643 | 0,908032 |
| Gcsh      | 5,76E-05 | -0,10036 | 0,246 | 0,367 | 0,908185 |
| Rnf114    | 5,79E-05 | -0,08603 | 0,27  | 0,399 | 0,913291 |
| Lmbrd1    | 5,79E-05 | -0,107   | 0,967 | 0,983 | 0,913406 |
| Riox1     | 5,83E-05 | -0,06282 | 0,059 | 0,133 | 0,920152 |
| 1810058I2 | 5,84E-05 | -0,11582 | 0,708 | 0,814 | 0,921912 |
| Ostm1     | 5,87E-05 | -0,08608 | 0,312 | 0,449 | 0,926103 |
| Rpl36al   | 5,89E-05 | -0,11047 | 0,839 | 0,876 | 0,928703 |
| Serinc1   | 5,9E-05  | 0,104423 | 0,998 | 0,996 | 0,930224 |
| Phkg2     | 5,91E-05 | -0,07293 | 0,272 | 0,407 | 0,93218  |
| Stk25     | 5,92E-05 | -0,11366 | 0,44  | 0,574 | 0,934303 |
| Mcf2      | 5,93E-05 | -0,08558 | 0,332 | 0,483 | 0,935686 |
| Zcwpw1    | 5,95E-05 | -0,07825 | 0,211 | 0,331 | 0,938182 |
| Cct5      | 5,95E-05 | -0,11063 | 0,817 | 0,897 | 0,938918 |
| Arid5a    | 5,96E-05 | 0,238928 | 0,286 | 0,192 | 0,939799 |
| Macf1     | 5,96E-05 | -0,13364 | 0,717 | 0,823 | 0,940696 |
| Wdr92     | 5,97E-05 | -0,07167 | 0,079 | 0,16  | 0,941247 |
| Dmxl1     | 6,01E-05 | 0,211861 | 0,598 | 0,549 | 0,94856  |
| Slc37a4   | 6,03E-05 | -0,08098 | 0,116 | 0,209 | 0,950961 |
| Snd1      | 6,03E-05 | -0,06682 | 0,31  | 0,458 | 0,951296 |
| Gtf2h2    | 6,06E-05 | -0,06095 | 0,139 | 0,247 | 0,956183 |
| Tdrkh     | 6,08E-05 | -0,06937 | 0,211 | 0,331 | 0,959614 |
| Dhrs7     | 6,11E-05 | -0,09419 | 0,462 | 0,618 | 0,963469 |
| Kin       | 6,11E-05 | -0,08218 | 0,229 | 0,357 | 0,96448  |
| Gm14295   | 6,16E-05 | -0,06925 | 0,068 | 0,146 | 0,971297 |
| Mum1      | 6,16E-05 | -0,08949 | 0,428 | 0,586 | 0,972528 |
| Exosc1    | 6,17E-05 | -0,07755 | 0,224 | 0,35  | 0,973531 |
| Npm3      | 6,19E-05 | -0,08397 | 0,189 | 0,302 | 0,976005 |
| Snrpd2    | 6,19E-05 | -0,10057 | 0,87  | 0,92  | 0,976843 |
| Tmem159   | 6,22E-05 | -0,08729 | 0,394 | 0,557 | 0,981861 |
| Fsd1      | 6,25E-05 | -0,07952 | 0,294 | 0,435 | 0,985519 |
| Gorasp2   | 6,26E-05 | -0,09129 | 0,4   | 0,546 | 0,987603 |

|            |          |          |       |       |          |
|------------|----------|----------|-------|-------|----------|
| Zfp369     | 6,29E-05 | -0,08698 | 0,094 | 0,179 | 0,991973 |
| Zcchc18    | 6,32E-05 | -0,12502 | 0,229 | 0,35  | 0,997172 |
| Zfp975     | 6,32E-05 | -0,0555  | 0,024 | 0,078 | 0,997184 |
| Fuom       | 6,36E-05 | -0,10225 | 0,163 | 0,264 | 1        |
| Zfp799     | 6,37E-05 | -0,06572 | 0,105 | 0,198 | 1        |
| Enox2      | 6,37E-05 | -0,08307 | 0,134 | 0,232 | 1        |
| Acot7      | 6,4E-05  | -0,09424 | 0,93  | 0,956 | 1        |
| Deaf1      | 6,47E-05 | -0,10665 | 0,233 | 0,348 | 1        |
| C030029H   | 6,5E-05  | -0,27706 | 0,594 | 0,641 | 1        |
| Nrap       | 6,5E-05  | -0,08059 | 0,095 | 0,184 | 1        |
| Abcg1      | 6,51E-05 | -0,13558 | 0,844 | 0,88  | 1        |
| Slc8a1     | 6,52E-05 | -0,08039 | 0,101 | 0,19  | 1        |
| 2610301B   | 6,57E-05 | -0,08097 | 0,145 | 0,249 | 1        |
| Crebl2     | 6,6E-05  | -0,10158 | 0,27  | 0,395 | 1        |
| Ermp1      | 6,61E-05 | 0,160949 | 0,914 | 0,888 | 1        |
| Adgrg6     | 6,62E-05 | 0,046603 | 0,033 | 0     | 1        |
| Hist1h2be  | 6,63E-05 | -0,09321 | 0,106 | 0,196 | 1        |
| Slc27a4    | 6,64E-05 | -0,08493 | 0,44  | 0,595 | 1        |
| Ssr2       | 6,7E-05  | -0,10158 | 0,67  | 0,795 | 1        |
| Rwdd3      | 6,74E-05 | -0,04946 | 0,02  | 0,072 | 1        |
| Dnajc14    | 6,74E-05 | -0,09421 | 0,272 | 0,392 | 1        |
| H2-Q7      | 6,75E-05 | 0,07851  | 0,039 | 0,002 | 1        |
| Lrmda      | 6,78E-05 | -0,05352 | 0,037 | 0,099 | 1        |
| Catsper2   | 6,79E-05 | -0,0688  | 0,084 | 0,169 | 1        |
| Nelfcd     | 6,8E-05  | -0,09435 | 0,222 | 0,338 | 1        |
| Ngrn       | 6,84E-05 | -0,06633 | 0,117 | 0,213 | 1        |
| Galnt6     | 6,84E-05 | -0,1676  | 0,839 | 0,892 | 1        |
| Trp53bp2   | 6,85E-05 | 0,150084 | 0,844 | 0,768 | 1        |
| Dnlz       | 6,9E-05  | -0,09468 | 0,439 | 0,591 | 1        |
| Zfhx3      | 6,9E-05  | 0,287866 | 0,354 | 0,27  | 1        |
| Bmf        | 6,92E-05 | 0,084801 | 0,075 | 0,021 | 1        |
| Sirt3      | 6,94E-05 | -0,08057 | 0,251 | 0,38  | 1        |
| Pex16      | 6,97E-05 | -0,08161 | 0,25  | 0,373 | 1        |
| Gm26720    | 7,02E-05 | 0,083969 | 0,108 | 0,042 | 1        |
| Snrpd3     | 7,03E-05 | -0,10579 | 0,69  | 0,795 | 1        |
| Ptrhd1     | 7,04E-05 | -0,10563 | 0,202 | 0,312 | 1        |
| Rft1       | 7,11E-05 | -0,07716 | 0,163 | 0,272 | 1        |
| Upf3a      | 7,16E-05 | -0,07848 | 0,297 | 0,439 | 1        |
| Rabac1     | 7,21E-05 | -0,08951 | 0,987 | 0,987 | 1        |
| Dock7      | 7,22E-05 | 0,191252 | 0,248 | 0,156 | 1        |
| Cog8       | 7,27E-05 | -0,08119 | 0,189 | 0,302 | 1        |
| Lsm6       | 7,27E-05 | -0,10727 | 0,552 | 0,692 | 1        |
| Sfi1       | 7,29E-05 | -0,09079 | 0,16  | 0,262 | 1        |
| D3Erttd751 | 7,3E-05  | -0,06162 | 0,158 | 0,27  | 1        |
| Nbas       | 7,35E-05 | 0,189725 | 0,752 | 0,692 | 1        |
| Zfp688     | 7,36E-05 | -0,09616 | 0,167 | 0,268 | 1        |
| Dph3       | 7,38E-05 | -0,09063 | 0,457 | 0,595 | 1        |
| Cog4       | 7,39E-05 | -0,08919 | 0,345 | 0,485 | 1        |
| Gosr2      | 7,41E-05 | -0,08089 | 0,33  | 0,47  | 1        |
| Fam58b     | 7,47E-05 | -0,08331 | 0,167 | 0,272 | 1        |
| Mipol1     | 7,48E-05 | -0,09986 | 0,149 | 0,247 | 1        |
| Mrps35     | 7,55E-05 | -0,08125 | 0,167 | 0,272 | 1        |

|          |          |          |       |       |   |
|----------|----------|----------|-------|-------|---|
| Ndfip1   | 7,57E-05 | -0,0871  | 0,305 | 0,445 | 1 |
| Rrn3     | 7,59E-05 | -0,06221 | 0,279 | 0,418 | 1 |
| Xrcc2    | 7,59E-05 | -0,07023 | 0,073 | 0,152 | 1 |
| Sae1     | 7,61E-05 | -0,08293 | 0,207 | 0,323 | 1 |
| Cox6b2   | 7,65E-05 | -0,07131 | 0,057 | 0,129 | 1 |
| Mta3     | 7,66E-05 | -0,09499 | 0,484 | 0,635 | 1 |
| Cdc42ep1 | 7,67E-05 | -0,13426 | 0,679 | 0,785 | 1 |
| Nutf2    | 7,71E-05 | -0,07787 | 0,139 | 0,238 | 1 |
| Lamtor1  | 7,81E-05 | -0,11619 | 0,818 | 0,865 | 1 |
| Tnfrsf1a | 7,84E-05 | 0,120379 | 0,128 | 0,057 | 1 |
| Zfp672   | 7,89E-05 | -0,0932  | 0,191 | 0,3   | 1 |
| Gbp7     | 7,93E-05 | 0,136396 | 0,075 | 0,021 | 1 |
| Fam102b  | 7,96E-05 | 0,095082 | 0,145 | 0,068 | 1 |
| Pir      | 7,97E-05 | -0,07658 | 0,094 | 0,179 | 1 |
| Zcchc9   | 7,99E-05 | -0,09918 | 0,303 | 0,437 | 1 |
| Plxna4   | 8E-05    | 0,070752 | 0,068 | 0,017 | 1 |
| Gm6710   | 8,01E-05 | -0,07717 | 0,077 | 0,156 | 1 |
| Nav1     | 8,04E-05 | 0,169901 | 0,631 | 0,536 | 1 |
| Tarbp1   | 8,05E-05 | -0,05434 | 0,029 | 0,086 | 1 |
| Zpr1     | 8,07E-05 | -0,07804 | 0,277 | 0,405 | 1 |
| Aasdh    | 8,09E-05 | -0,06726 | 0,083 | 0,165 | 1 |
| Dpm2     | 8,13E-05 | -0,12656 | 0,459 | 0,591 | 1 |
| Nrip1    | 8,13E-05 | -0,11279 | 0,336 | 0,473 | 1 |
| Anln     | 8,16E-05 | -0,17389 | 0,972 | 0,945 | 1 |
| Mks1     | 8,19E-05 | -0,07238 | 0,187 | 0,302 | 1 |
| Alyref   | 8,19E-05 | -0,11618 | 0,574 | 0,711 | 1 |
| Rnf34    | 8,21E-05 | -0,08558 | 0,33  | 0,466 | 1 |
| Zdhhc24  | 8,3E-05  | -0,07864 | 0,083 | 0,162 | 1 |
| Plxdc2   | 8,37E-05 | 0,133215 | 0,954 | 0,914 | 1 |
| Grn      | 8,42E-05 | 0,20537  | 0,525 | 0,46  | 1 |
| Sharpin  | 8,48E-05 | -0,0838  | 0,196 | 0,306 | 1 |
| Ttyh2    | 8,53E-05 | -0,12215 | 0,985 | 0,987 | 1 |
| Acad8    | 8,54E-05 | -0,06945 | 0,207 | 0,327 | 1 |
| Stx6     | 8,57E-05 | 0,163014 | 0,739 | 0,686 | 1 |
| Cyp4f16  | 8,59E-05 | -0,07221 | 0,105 | 0,194 | 1 |
| Erh      | 8,69E-05 | -0,09884 | 0,499 | 0,652 | 1 |
| Zc3h8    | 8,69E-05 | -0,0882  | 0,075 | 0,152 | 1 |
| Dera     | 8,69E-05 | -0,08074 | 0,083 | 0,162 | 1 |
| Pfkm     | 8,77E-05 | -0,03402 | 0,006 | 0,042 | 1 |
| Jkamp    | 8,82E-05 | -0,10651 | 0,556 | 0,705 | 1 |
| Wdcp     | 8,85E-05 | -0,08551 | 0,167 | 0,272 | 1 |
| Hddc3    | 8,86E-05 | -0,0814  | 0,143 | 0,241 | 1 |
| Itgb5    | 8,91E-05 | -0,09971 | 0,361 | 0,502 | 1 |
| Wrb      | 8,96E-05 | -0,08142 | 0,24  | 0,357 | 1 |
| Col9a1   | 8,96E-05 | -0,04623 | 0,022 | 0,074 | 1 |
| Fahd1    | 8,98E-05 | -0,08726 | 0,171 | 0,274 | 1 |
| Birc6    | 8,99E-05 | 0,16646  | 0,793 | 0,751 | 1 |
| Gm5113   | 9,06E-05 | -0,07727 | 0,083 | 0,162 | 1 |
| Wscd1    | 9,07E-05 | -0,08979 | 0,998 | 0,998 | 1 |
| Dalrd3   | 9,1E-05  | -0,08098 | 0,242 | 0,365 | 1 |
| Gopc     | 9,1E-05  | -0,09719 | 0,262 | 0,388 | 1 |
| Clcn4    | 9,13E-05 | -0,11093 | 0,864 | 0,903 | 1 |

|           |          |          |       |       |   |
|-----------|----------|----------|-------|-------|---|
| Fam136a   | 9,19E-05 | -0,06448 | 0,11  | 0,203 | 1 |
| Cntn3     | 9,31E-05 | -0,08379 | 0,125 | 0,219 | 1 |
| Phc1      | 9,33E-05 | -0,08938 | 0,424 | 0,578 | 1 |
| Zdhhc3    | 9,35E-05 | -0,09542 | 0,273 | 0,403 | 1 |
| D130040H  | 9,41E-05 | -0,05493 | 0,09  | 0,175 | 1 |
| Rps9      | 9,46E-05 | -0,06763 | 0,996 | 0,996 | 1 |
| Mrpl46    | 9,51E-05 | -0,08016 | 0,198 | 0,31  | 1 |
| Ccnc      | 9,56E-05 | -0,07078 | 0,226 | 0,35  | 1 |
| 4930453N  | 9,58E-05 | -0,09192 | 0,272 | 0,397 | 1 |
| Rnaset2a  | 9,63E-05 | -0,07522 | 0,228 | 0,352 | 1 |
| Plxnb1    | 9,64E-05 | 0,190146 | 0,516 | 0,441 | 1 |
| Smim5     | 9,68E-05 | -0,10145 | 0,05  | 0,116 | 1 |
| Svbp      | 9,91E-05 | -0,05877 | 0,273 | 0,405 | 1 |
| Eefsec    | 9,92E-05 | -0,08498 | 0,251 | 0,371 | 1 |
| Pigf      | 9,96E-05 | -0,06926 | 0,147 | 0,249 | 1 |
| Cep85l    | 0,0001   | -0,07273 | 0,156 | 0,262 | 1 |
| Rpl30     | 0,0001   | -0,07441 | 0,996 | 0,996 | 1 |
| 1300002E1 | 0,0001   | -0,08242 | 0,171 | 0,276 | 1 |
| Sif1      | 0,000101 | -0,07988 | 0,176 | 0,283 | 1 |
| Gm40578   | 0,000101 | -0,02911 | 0     | 0,027 | 1 |
| Mcm3      | 0,000102 | -0,06937 | 0,07  | 0,146 | 1 |
| Tmem243   | 0,000103 | -0,0857  | 0,38  | 0,525 | 1 |
| Lrif1     | 0,000103 | -0,10656 | 0,349 | 0,481 | 1 |
| Ltn1      | 0,000104 | -0,09953 | 0,363 | 0,508 | 1 |
| Zfp788    | 0,000104 | -0,07981 | 0,161 | 0,264 | 1 |
| Kcnrg     | 0,000104 | 0,077739 | 0,066 | 0,017 | 1 |
| Mon1b     | 0,000104 | -0,08054 | 0,127 | 0,219 | 1 |
| Inpp5k    | 0,000105 | -0,0959  | 0,231 | 0,344 | 1 |
| Fam228b   | 0,000106 | -0,12002 | 0,244 | 0,352 | 1 |
| Fam96b    | 0,000106 | -0,09556 | 0,637 | 0,774 | 1 |
| Atg4d     | 0,000106 | -0,09426 | 0,327 | 0,454 | 1 |
| Zswim9    | 0,000106 | -0,05967 | 0,094 | 0,179 | 1 |
| Eif1a     | 0,000106 | 0,190663 | 0,317 | 0,228 | 1 |
| Fyco1     | 0,000106 | -0,08412 | 0,279 | 0,401 | 1 |
| Vim       | 0,000106 | 0,190843 | 0,125 | 0,055 | 1 |
| Fggy      | 0,000106 | -0,07953 | 0,149 | 0,249 | 1 |
| Acad12    | 0,000106 | -0,06586 | 0,068 | 0,143 | 1 |
| Zfhx4     | 0,000106 | -0,10367 | 0,321 | 0,454 | 1 |
| Ethe1     | 0,000106 | -0,0984  | 0,224 | 0,331 | 1 |
| Dnmt3a    | 0,000106 | 0,168951 | 0,672 | 0,584 | 1 |
| Ubash3b   | 0,000107 | -0,05105 | 0,273 | 0,414 | 1 |
| Tmem121   | 0,000107 | -0,08714 | 0,158 | 0,257 | 1 |
| Tsen15    | 0,000107 | -0,06753 | 0,123 | 0,217 | 1 |
| Rps6      | 0,000107 | -0,09009 | 0,993 | 0,985 | 1 |
| Zfp14     | 0,000108 | -0,06789 | 0,128 | 0,224 | 1 |
| Tmx2      | 0,000108 | -0,10843 | 0,642 | 0,764 | 1 |
| B3gat3    | 0,000109 | -0,07784 | 0,466 | 0,62  | 1 |
| Slc22a18  | 0,000109 | -0,05142 | 0,02  | 0,07  | 1 |
| Grasp     | 0,000109 | 0,16099  | 0,215 | 0,129 | 1 |
| Brd4      | 0,00011  | 0,15938  | 0,67  | 0,597 | 1 |
| Ranbp1    | 0,00011  | -0,11099 | 0,62  | 0,736 | 1 |
| Znr1as    | 0,00011  | -0,06125 | 0,062 | 0,135 | 1 |



|          |          |          |       |       |   |
|----------|----------|----------|-------|-------|---|
| Tmem184k | 0,000111 | -0,09073 | 0,383 | 0,527 | 1 |
| Pqlc3    | 0,000111 | 0,101446 | 0,16  | 0,08  | 1 |
| Chd3os   | 0,000111 | -0,04969 | 0,031 | 0,089 | 1 |
| Gm46218  | 0,000112 | -0,06414 | 0,05  | 0,116 | 1 |
| Cd2ap    | 0,000112 | -0,06303 | 0,418 | 0,589 | 1 |
| Lgmn     | 0,000112 | 0,122234 | 0,936 | 0,871 | 1 |
| Gphn     | 0,000113 | -0,11053 | 0,499 | 0,641 | 1 |
| Rabggta  | 0,000114 | -0,07434 | 0,172 | 0,278 | 1 |
| Atg9a    | 0,000114 | -0,09805 | 0,294 | 0,42  | 1 |
| 2810006K | 0,000114 | -0,06104 | 0,088 | 0,171 | 1 |
| Rsrc1    | 0,000114 | -0,09821 | 0,683 | 0,783 | 1 |
| Bmp4     | 0,000114 | 0,088091 | 0,062 | 0,015 | 1 |
| Sema6a   | 0,000114 | -0,16929 | 0,505 | 0,616 | 1 |
| Fibin    | 0,000115 | -0,08655 | 0,105 | 0,192 | 1 |
| Hdac7    | 0,000115 | 0,20327  | 0,406 | 0,321 | 1 |
| P2rx7    | 0,000115 | -0,0629  | 0,215 | 0,338 | 1 |
| Abt1     | 0,000116 | -0,07741 | 0,156 | 0,257 | 1 |
| Ccdc115  | 0,000116 | -0,07748 | 0,191 | 0,3   | 1 |
| L1cam    | 0,000116 | 0,084801 | 0,066 | 0,017 | 1 |
| Aplp2    | 0,000116 | -0,08322 | 0,998 | 0,998 | 1 |
| Fam206a  | 0,000117 | -0,07546 | 0,125 | 0,217 | 1 |
| Zfp738   | 0,000117 | -0,08268 | 0,183 | 0,293 | 1 |
| Ssr4     | 0,000118 | -0,12028 | 0,721 | 0,819 | 1 |
| Gpn1     | 0,000119 | -0,07383 | 0,169 | 0,274 | 1 |
| Cep295   | 0,000119 | -0,09267 | 0,239 | 0,361 | 1 |
| Top1mt   | 0,00012  | -0,07669 | 0,101 | 0,186 | 1 |
| Ccdc152  | 0,00012  | -0,08885 | 0,127 | 0,219 | 1 |
| Srfbp1   | 0,000121 | -0,06189 | 0,086 | 0,167 | 1 |
| Abhd17a  | 0,000121 | -0,1208  | 0,815 | 0,876 | 1 |
| Zfp157   | 0,000121 | -0,06195 | 0,218 | 0,34  | 1 |
| Wdyhv1   | 0,000123 | -0,05167 | 0,084 | 0,167 | 1 |
| Nit2     | 0,000123 | -0,08069 | 0,101 | 0,186 | 1 |
| Ccdc127  | 0,000124 | -0,08716 | 0,369 | 0,508 | 1 |
| Leprotl1 | 0,000124 | -0,09536 | 0,486 | 0,631 | 1 |
| 9030025P | 0,000124 | -0,12417 | 0,152 | 0,249 | 1 |
| Stk19    | 0,000125 | -0,06937 | 0,286 | 0,418 | 1 |
| Otud7b   | 0,000125 | 0,155276 | 0,983 | 0,97  | 1 |
| Stxbp3   | 0,000126 | -0,09443 | 0,903 | 0,937 | 1 |
| Krcc1    | 0,000127 | -0,07331 | 0,35  | 0,498 | 1 |
| 6330562C | 0,000127 | -0,05954 | 0,059 | 0,129 | 1 |
| Hmgb3    | 0,000128 | -0,0723  | 0,062 | 0,133 | 1 |
| Tmem242  | 0,000128 | -0,08397 | 0,237 | 0,357 | 1 |
| Zyx      | 0,000128 | 0,192019 | 0,525 | 0,437 | 1 |
| H2afv    | 0,000129 | -0,09106 | 0,589 | 0,717 | 1 |
| Mettl16  | 0,00013  | -0,08642 | 0,301 | 0,432 | 1 |
| Ccdc12   | 0,00013  | -0,11184 | 0,571 | 0,711 | 1 |
| Zfp40    | 0,00013  | -0,08088 | 0,141 | 0,238 | 1 |
| Scamp1   | 0,00013  | -0,09474 | 0,334 | 0,468 | 1 |
| Tdrd3    | 0,00013  | -0,06924 | 0,189 | 0,302 | 1 |
| Timm17a  | 0,000131 | -0,11102 | 0,594 | 0,728 | 1 |
| Ndufa2   | 0,000131 | -0,0865  | 0,958 | 0,981 | 1 |
| Wdr19    | 0,000132 | -0,06937 | 0,068 | 0,141 | 1 |

|           |          |          |       |       |   |
|-----------|----------|----------|-------|-------|---|
| Aebp1     | 0,000132 | 0,271735 | 0,361 | 0,274 | 1 |
| Saxo2     | 0,000132 | -0,06755 | 0,068 | 0,141 | 1 |
| Porcn     | 0,000132 | -0,07876 | 0,163 | 0,268 | 1 |
| Ankrd54   | 0,000133 | -0,07037 | 0,16  | 0,262 | 1 |
| Cdkl3     | 0,000134 | -0,0719  | 0,077 | 0,154 | 1 |
| Tkfc      | 0,000134 | -0,07906 | 0,083 | 0,16  | 1 |
| Mia2      | 0,000134 | -0,10754 | 0,497 | 0,65  | 1 |
| Drap1     | 0,000135 | -0,10709 | 0,815 | 0,884 | 1 |
| Usp18     | 0,000135 | 0,083983 | 0,05  | 0,008 | 1 |
| Lcat      | 0,000135 | -0,09314 | 0,077 | 0,152 | 1 |
| Dcun1d4   | 0,000135 | -0,09147 | 0,167 | 0,268 | 1 |
| Mtfr1     | 0,000135 | -0,07092 | 0,121 | 0,213 | 1 |
| Gm32633   | 0,000136 | -0,03799 | 0,015 | 0,059 | 1 |
| Celsr2    | 0,000137 | -0,10249 | 0,253 | 0,371 | 1 |
| Rpl27-ps3 | 0,000138 | -0,06837 | 0,062 | 0,133 | 1 |
| Eif3k     | 0,000138 | -0,10378 | 0,873 | 0,914 | 1 |
| Ythdc1    | 0,000138 | 0,127357 | 0,749 | 0,665 | 1 |
| Klhdc1    | 0,000138 | -0,07601 | 0,105 | 0,19  | 1 |
| Mto1      | 0,00014  | -0,07462 | 0,139 | 0,234 | 1 |
| Gemin8    | 0,00014  | -0,07406 | 0,108 | 0,194 | 1 |
| Eif4e2    | 0,00014  | -0,08684 | 0,358 | 0,502 | 1 |
| Slc25a18  | 0,00014  | -0,02749 | 0,002 | 0,032 | 1 |
| Ap3s2     | 0,00014  | -0,08919 | 0,292 | 0,416 | 1 |
| Bloc1s4   | 0,00014  | -0,07764 | 0,237 | 0,354 | 1 |
| Ctsh      | 0,000141 | -0,04208 | 0,007 | 0,044 | 1 |
| Gm4279    | 0,000142 | -0,04007 | 0,007 | 0,044 | 1 |
| Acly      | 0,000143 | 0,206644 | 0,6   | 0,536 | 1 |
| Pcdhga7   | 0,000143 | -0,06748 | 0,048 | 0,112 | 1 |
| Zfp1      | 0,000144 | -0,08844 | 0,202 | 0,308 | 1 |
| Klhl28    | 0,000145 | -0,06874 | 0,275 | 0,403 | 1 |
| Gm38335   | 0,000145 | 0,115314 | 0,075 | 0,023 | 1 |
| Taf11     | 0,000146 | -0,07671 | 0,369 | 0,5   | 1 |
| Ephx1     | 0,000146 | -0,10885 | 0,143 | 0,238 | 1 |
| Arhgef28  | 0,000147 | -0,11627 | 0,45  | 0,591 | 1 |
| Nudt6     | 0,000147 | -0,05983 | 0,048 | 0,112 | 1 |
| Pdpx      | 0,000149 | -0,04588 | 0,022 | 0,072 | 1 |
| Tigd2     | 0,000149 | -0,09888 | 0,213 | 0,321 | 1 |
| Smtnl2    | 0,000149 | -0,09029 | 0,094 | 0,173 | 1 |
| 4732440Dl | 0,00015  | -0,06781 | 0,073 | 0,148 | 1 |
| Neb       | 0,000151 | -0,04171 | 0,004 | 0,036 | 1 |
| Lix1      | 0,000151 | -0,04189 | 0,006 | 0,04  | 1 |
| Atox1     | 0,000151 | -0,10237 | 0,75  | 0,835 | 1 |
| Ids       | 0,000152 | 0,15944  | 0,817 | 0,778 | 1 |
| Lmf1      | 0,000152 | -0,0608  | 0,352 | 0,502 | 1 |
| Txndc9    | 0,000153 | -0,09618 | 0,558 | 0,698 | 1 |
| Cdc42bpa  | 0,000154 | -0,1056  | 0,956 | 0,96  | 1 |
| Sirt4     | 0,000154 | -0,07092 | 0,13  | 0,224 | 1 |
| Lysmd2    | 0,000155 | -0,03756 | 0,059 | 0,129 | 1 |
| Slc30a2   | 0,000155 | -0,03786 | 0,004 | 0,036 | 1 |
| 27000970l | 0,000156 | -0,0562  | 0,215 | 0,333 | 1 |
| Litaf     | 0,000157 | -0,09483 | 0,991 | 0,992 | 1 |
| Ash1l     | 0,000158 | 0,165688 | 0,844 | 0,787 | 1 |

|           |          |          |       |       |   |
|-----------|----------|----------|-------|-------|---|
| Vkorc1    | 0,000158 | -0,11787 | 0,574 | 0,688 | 1 |
| Pomk      | 0,000159 | -0,05642 | 0,061 | 0,131 | 1 |
| Mef2a     | 0,000159 | 0,180976 | 0,76  | 0,728 | 1 |
| Rhobtb3   | 0,000159 | -0,11005 | 0,666 | 0,8   | 1 |
| Gm45495   | 0,00016  | -0,06373 | 0,05  | 0,114 | 1 |
| Tomm6     | 0,00016  | -0,042   | 0,389 | 0,563 | 1 |
| 0610010K: | 0,000161 | -0,08657 | 0,266 | 0,384 | 1 |
| Eif2d     | 0,000162 | -0,06407 | 0,158 | 0,262 | 1 |
| Mrps9     | 0,000162 | -0,09319 | 0,273 | 0,392 | 1 |
| Ercc6l2   | 0,000163 | -0,09497 | 0,35  | 0,487 | 1 |
| Jrkl      | 0,000163 | -0,0711  | 0,187 | 0,297 | 1 |
| Zcchc10   | 0,000164 | -0,08125 | 0,145 | 0,241 | 1 |
| Fam214a   | 0,000164 | -0,09784 | 0,18  | 0,283 | 1 |
| Bcas2     | 0,000164 | -0,10437 | 0,694 | 0,812 | 1 |
| Fzd7      | 0,000164 | -0,07116 | 0,106 | 0,192 | 1 |
| Mien1     | 0,000165 | -0,08992 | 0,818 | 0,861 | 1 |
| Rmnd5b    | 0,000165 | -0,07962 | 0,158 | 0,255 | 1 |
| Slc35b2   | 0,000165 | -0,0833  | 0,305 | 0,439 | 1 |
| Ercc5     | 0,000166 | -0,07886 | 0,152 | 0,249 | 1 |
| Sspo      | 0,000167 | 0,117491 | 0,198 | 0,114 | 1 |
| Gm26782   | 0,000167 | -0,09876 | 0,15  | 0,243 | 1 |
| Rpain     | 0,000168 | -0,06193 | 0,2   | 0,314 | 1 |
| Trp53rka  | 0,000169 | -0,05907 | 0,217 | 0,333 | 1 |
| Zfp1      | 0,000169 | -0,0797  | 0,292 | 0,416 | 1 |
| Abcb10    | 0,000169 | -0,122   | 0,36  | 0,492 | 1 |
| Apoa1     | 0,00017  | 0,054949 | 0,035 | 0,002 | 1 |
| Senp5     | 0,00017  | -0,0779  | 0,277 | 0,399 | 1 |
| Rdh12     | 0,00017  | -0,06166 | 0,062 | 0,133 | 1 |
| Rit1      | 0,00017  | -0,06715 | 0,196 | 0,308 | 1 |
| Terf2ip   | 0,00017  | -0,07746 | 0,306 | 0,443 | 1 |
| Degs1     | 0,000171 | -0,0907  | 0,978 | 0,992 | 1 |
| Zfp346    | 0,000171 | -0,07895 | 0,152 | 0,249 | 1 |
| Carnmt1   | 0,000171 | -0,07248 | 0,182 | 0,289 | 1 |
| Plekhg5   | 0,000172 | 0,039574 | 0,029 | 0     | 1 |
| Gm5617    | 0,000172 | -0,07949 | 0,198 | 0,308 | 1 |
| Tkt       | 0,000172 | -0,09104 | 0,994 | 0,994 | 1 |
| Vamp8     | 0,000172 | 0,181968 | 0,383 | 0,291 | 1 |
| Derl1     | 0,000173 | -0,10369 | 0,714 | 0,804 | 1 |
| Rpe       | 0,000174 | -0,0784  | 0,306 | 0,439 | 1 |
| Pdcd2     | 0,000174 | -0,07691 | 0,187 | 0,291 | 1 |
| Eid2b     | 0,000174 | -0,06648 | 0,092 | 0,173 | 1 |
| Rab11b    | 0,000174 | -0,10391 | 0,789 | 0,854 | 1 |
| Vps25     | 0,000174 | -0,05897 | 0,073 | 0,148 | 1 |
| Fam207a   | 0,000174 | -0,07089 | 0,215 | 0,325 | 1 |
| Arf1      | 0,000176 | -0,09723 | 0,95  | 0,968 | 1 |
| Arhgef40  | 0,000176 | 0,107159 | 0,141 | 0,07  | 1 |
| RbmX2     | 0,000176 | -0,07574 | 0,18  | 0,283 | 1 |
| Dnajb5    | 0,000177 | -0,06454 | 0,059 | 0,127 | 1 |
| Creb3     | 0,000177 | -0,07819 | 0,341 | 0,481 | 1 |
| Rps10     | 0,00018  | -0,07423 | 0,998 | 0,996 | 1 |
| Rab24     | 0,000181 | -0,09628 | 0,35  | 0,479 | 1 |
| Mmaa      | 0,000182 | -0,06053 | 0,174 | 0,281 | 1 |

|           |          |          |       |       |   |
|-----------|----------|----------|-------|-------|---|
| Casp3     | 0,000182 | 0,060527 | 0,061 | 0,015 | 1 |
| C1qa      | 0,000183 | -0,04267 | 0,024 | 0,074 | 1 |
| Negr1     | 0,000184 | -0,07132 | 0,167 | 0,272 | 1 |
| Gpn2      | 0,000186 | -0,05613 | 0,16  | 0,264 | 1 |
| Zfp330    | 0,000186 | -0,05644 | 0,218 | 0,338 | 1 |
| Rell1     | 0,000188 | 0,18355  | 0,488 | 0,39  | 1 |
| 1010001B: | 0,000188 | -0,025   | 0     | 0,025 | 1 |
| Gm266     | 0,000188 | -0,02706 | 0     | 0,025 | 1 |
| Gm29642   | 0,000188 | -0,02911 | 0     | 0,025 | 1 |
| Naaa      | 0,000189 | -0,06521 | 0,073 | 0,148 | 1 |
| Slc25a19  | 0,000189 | -0,0603  | 0,279 | 0,409 | 1 |
| Zdhhc16   | 0,00019  | -0,07777 | 0,141 | 0,234 | 1 |
| Eef1akmt1 | 0,000191 | -0,0721  | 0,103 | 0,186 | 1 |
| Dnaja2    | 0,000191 | -0,08353 | 0,695 | 0,789 | 1 |
| Bub3      | 0,000191 | -0,10174 | 0,818 | 0,907 | 1 |
| Nudt9     | 0,000192 | -0,08144 | 0,462 | 0,618 | 1 |
| Cmss1     | 0,000192 | -0,08242 | 0,161 | 0,257 | 1 |
| Gsto2     | 0,000192 | -0,0661  | 0,088 | 0,167 | 1 |
| Hacd2     | 0,000193 | -0,08636 | 0,352 | 0,494 | 1 |
| Cbfb      | 0,000193 | -0,06359 | 0,352 | 0,494 | 1 |
| Pmepa1    | 0,000194 | -0,10168 | 0,22  | 0,325 | 1 |
| Nxt2      | 0,000194 | -0,12095 | 0,613 | 0,728 | 1 |
| Copg2     | 0,000194 | -0,0911  | 0,339 | 0,466 | 1 |
| Pcf11     | 0,000195 | 0,202136 | 0,505 | 0,432 | 1 |
| Arhgef9   | 0,000195 | -0,09708 | 0,191 | 0,291 | 1 |
| Sap30l    | 0,000196 | -0,0862  | 0,328 | 0,462 | 1 |
| Srp19     | 0,000197 | -0,10449 | 0,662 | 0,774 | 1 |
| Slc4a1ap  | 0,000197 | -0,08183 | 0,2   | 0,306 | 1 |
| Nrip2     | 0,000198 | -0,03663 | 0,011 | 0,051 | 1 |
| Aggf1     | 0,000199 | -0,05328 | 0,371 | 0,534 | 1 |
| Mrpl35    | 0,0002   | -0,08184 | 0,231 | 0,348 | 1 |
| Ywhab     | 0,0002   | -0,09732 | 0,965 | 0,96  | 1 |
| 2410004B: | 0,000201 | -0,07956 | 0,437 | 0,584 | 1 |
| Frg1      | 0,000202 | -0,1026  | 0,481 | 0,614 | 1 |
| Rbm34     | 0,000203 | -0,06628 | 0,264 | 0,392 | 1 |
| Nedd4l    | 0,000204 | 0,163206 | 0,4   | 0,302 | 1 |
| Pik3r3    | 0,000205 | 0,260565 | 0,325 | 0,238 | 1 |
| Maea      | 0,000205 | -0,06407 | 0,292 | 0,42  | 1 |
| Med19     | 0,000205 | -0,09681 | 0,367 | 0,481 | 1 |
| Map2k1    | 0,000205 | -0,08613 | 0,477 | 0,614 | 1 |
| Rad18     | 0,000207 | -0,07071 | 0,064 | 0,133 | 1 |
| Azi2      | 0,000208 | -0,0869  | 0,317 | 0,439 | 1 |
| Csde1     | 0,000209 | 0,121683 | 0,98  | 0,962 | 1 |
| Cotl1     | 0,000209 | -0,08368 | 0,16  | 0,259 | 1 |
| Gfer      | 0,00021  | -0,07121 | 0,191 | 0,297 | 1 |
| Necap2    | 0,000211 | -0,0939  | 0,55  | 0,684 | 1 |
| Mettl4    | 0,000212 | -0,05497 | 0,035 | 0,091 | 1 |
| Mesd      | 0,000214 | -0,0771  | 0,319 | 0,447 | 1 |
| Pnpt1     | 0,000216 | -0,06149 | 0,136 | 0,23  | 1 |
| Crbn      | 0,000216 | -0,09579 | 0,336 | 0,464 | 1 |
| Rps6ka1   | 0,000216 | -0,07609 | 0,211 | 0,319 | 1 |
| Vamp4     | 0,000217 | -0,09133 | 0,354 | 0,477 | 1 |

|           |          |          |       |       |   |
|-----------|----------|----------|-------|-------|---|
| Ppip5k2   | 0,000217 | -0,08593 | 0,284 | 0,414 | 1 |
| Pclo      | 0,000217 | -0,08947 | 0,244 | 0,359 | 1 |
| Nudt1     | 0,000218 | -0,06663 | 0,081 | 0,156 | 1 |
| Ndufs1    | 0,000218 | -0,08902 | 0,527 | 0,675 | 1 |
| Mfn1      | 0,000219 | -0,10639 | 0,532 | 0,635 | 1 |
| Usp39     | 0,000219 | -0,07643 | 0,174 | 0,276 | 1 |
| Gm13403   | 0,000219 | -0,05754 | 0,053 | 0,118 | 1 |
| Gas8      | 0,000221 | -0,06646 | 0,121 | 0,209 | 1 |
| 281042910 | 0,000221 | -0,0679  | 0,171 | 0,272 | 1 |
| Slitrk5   | 0,000222 | -0,05518 | 0,018 | 0,063 | 1 |
| Lamtor3   | 0,000225 | -0,07673 | 0,295 | 0,422 | 1 |
| Ruvbl1    | 0,000225 | -0,08537 | 0,301 | 0,426 | 1 |
| Ppil1     | 0,000227 | -0,07473 | 0,145 | 0,238 | 1 |
| Smug1     | 0,000229 | -0,07384 | 0,092 | 0,171 | 1 |
| Timm44    | 0,000229 | -0,07642 | 0,369 | 0,515 | 1 |
| Hdgfl2    | 0,00023  | -0,07504 | 0,332 | 0,466 | 1 |
| Edc3      | 0,00023  | -0,07164 | 0,097 | 0,177 | 1 |
| Fam124a   | 0,000231 | 0,052846 | 0,039 | 0,004 | 1 |
| Tecpr2    | 0,000231 | -0,07961 | 0,332 | 0,47  | 1 |
| Sgpl1     | 0,000232 | 0,127835 | 0,347 | 0,251 | 1 |
| Dync1i2   | 0,000232 | -0,08907 | 0,982 | 0,992 | 1 |
| Pigu      | 0,000232 | -0,08412 | 0,319 | 0,447 | 1 |
| Mttp      | 0,000233 | -0,05468 | 0,077 | 0,152 | 1 |
| Mtmr14    | 0,000233 | -0,0696  | 0,145 | 0,241 | 1 |
| Dnajc3    | 0,000234 | -0,09641 | 0,774 | 0,863 | 1 |
| Plekha1   | 0,000234 | 0,184051 | 0,844 | 0,793 | 1 |
| F8a       | 0,000235 | -0,06667 | 0,139 | 0,232 | 1 |
| Trappc4   | 0,000235 | -0,10709 | 0,666 | 0,793 | 1 |
| Rtcb      | 0,000235 | -0,08372 | 0,492 | 0,65  | 1 |
| Cpped1    | 0,000235 | -0,09064 | 0,187 | 0,287 | 1 |
| Rock2     | 0,000235 | 0,171353 | 0,717 | 0,69  | 1 |
| Eif3i     | 0,000235 | -0,09876 | 0,659 | 0,753 | 1 |
| Med15     | 0,000236 | -0,0641  | 0,286 | 0,422 | 1 |
| Nudt16l1  | 0,000236 | -0,09768 | 0,385 | 0,502 | 1 |
| Lym9      | 0,000236 | -0,07991 | 0,154 | 0,249 | 1 |
| Zfand2a   | 0,000238 | -0,07504 | 0,182 | 0,285 | 1 |
| Alg2      | 0,000239 | -0,07522 | 0,257 | 0,378 | 1 |
| Fyb       | 0,00024  | -0,03261 | 0,009 | 0,046 | 1 |
| Ppm1k     | 0,000241 | -0,0734  | 0,226 | 0,338 | 1 |
| Stat2     | 0,000242 | 0,216114 | 0,312 | 0,224 | 1 |
| Tram2     | 0,000242 | 0,099485 | 0,139 | 0,07  | 1 |
| Them4     | 0,000243 | -0,08005 | 0,242 | 0,359 | 1 |
| Pmpca     | 0,000243 | -0,07504 | 0,345 | 0,479 | 1 |
| Celf1     | 0,000247 | 0,187737 | 0,624 | 0,582 | 1 |
| Slc9b2    | 0,000248 | -0,12257 | 0,055 | 0,118 | 1 |
| Xrcc1     | 0,000248 | -0,05257 | 0,213 | 0,329 | 1 |
| 2610037Dl | 0,000248 | -0,07333 | 0,117 | 0,205 | 1 |
| Trim27    | 0,000249 | -0,06438 | 0,13  | 0,222 | 1 |
| Blcap     | 0,000249 | -0,07375 | 0,244 | 0,359 | 1 |
| Ahnak     | 0,00025  | 0,123731 | 0,059 | 0,015 | 1 |
| Ankrd39   | 0,00025  | -0,08607 | 0,196 | 0,3   | 1 |
| Zfp65     | 0,00025  | -0,06342 | 0,086 | 0,162 | 1 |

|           |          |          |       |       |   |
|-----------|----------|----------|-------|-------|---|
| Nxf1      | 0,00025  | -0,10293 | 0,694 | 0,787 | 1 |
| Sdhaf2    | 0,00025  | -0,06817 | 0,226 | 0,338 | 1 |
| A93000610 | 0,000251 | -0,03747 | 0,002 | 0,03  | 1 |
| Gria2     | 0,000252 | -0,03136 | 0,002 | 0,03  | 1 |
| Pla2g7    | 0,000252 | -0,02727 | 0,002 | 0,03  | 1 |
| Rrp36     | 0,000253 | -0,0576  | 0,295 | 0,43  | 1 |
| 1110020A  | 0,000254 | -0,05337 | 0,031 | 0,084 | 1 |
| Srp54a    | 0,000254 | -0,03478 | 0,259 | 0,39  | 1 |
| Sc5d      | 0,000254 | 0,152199 | 0,853 | 0,812 | 1 |
| Hnrnp1    | 0,000255 | 0,155324 | 0,883 | 0,871 | 1 |
| Nifk      | 0,000255 | -0,05385 | 0,206 | 0,31  | 1 |
| Ston2     | 0,000257 | -0,11024 | 0,277 | 0,384 | 1 |
| Insig2    | 0,000258 | -0,07151 | 0,29  | 0,418 | 1 |
| Asb8      | 0,000259 | -0,06456 | 0,281 | 0,409 | 1 |
| 2610002M  | 0,00026  | -0,06978 | 0,123 | 0,209 | 1 |
| Surf2     | 0,00026  | -0,07852 | 0,242 | 0,357 | 1 |
| Zfp521    | 0,00026  | -0,03624 | 0,007 | 0,042 | 1 |
| Kif1a     | 0,00026  | 0,097477 | 0,989 | 0,981 | 1 |
| Asna1     | 0,000261 | -0,07461 | 0,44  | 0,601 | 1 |
| Pcca      | 0,000262 | -0,07715 | 0,215 | 0,319 | 1 |
| Map9      | 0,000265 | -0,07237 | 0,077 | 0,15  | 1 |
| Farsb     | 0,000265 | -0,07869 | 0,242 | 0,354 | 1 |
| Snrpa     | 0,000265 | -0,08937 | 0,451 | 0,595 | 1 |
| Zfp458    | 0,000265 | -0,0766  | 0,127 | 0,215 | 1 |
| Fam98b    | 0,000267 | -0,07271 | 0,29  | 0,418 | 1 |
| Fnip2     | 0,000269 | 0,129297 | 0,279 | 0,188 | 1 |
| Pura      | 0,000269 | 0,123204 | 0,974 | 0,962 | 1 |
| Tbcc      | 0,000269 | -0,07327 | 0,233 | 0,346 | 1 |
| Xaf1      | 0,00027  | -0,10029 | 0,554 | 0,681 | 1 |
| Mecr      | 0,000273 | -0,07    | 0,097 | 0,175 | 1 |
| Kndc1     | 0,000274 | 0,182868 | 0,837 | 0,806 | 1 |
| Psmb9     | 0,000277 | 0,057056 | 0,028 | 0     | 1 |
| 672042710 | 0,000277 | -0,07658 | 0,088 | 0,165 | 1 |
| Fam173b   | 0,000278 | -0,09541 | 0,158 | 0,249 | 1 |
| Kctd15    | 0,000279 | 0,096499 | 0,13  | 0,063 | 1 |
| Surf6     | 0,000281 | -0,08602 | 0,161 | 0,253 | 1 |
| Tmem123   | 0,000281 | -0,08168 | 0,451 | 0,603 | 1 |
| Fbx14     | 0,000282 | -0,06464 | 0,15  | 0,245 | 1 |
| Ggnbp2    | 0,000283 | 0,167014 | 0,67  | 0,624 | 1 |
| Nsrp1     | 0,000285 | -0,07301 | 0,314 | 0,441 | 1 |
| Ankmy2    | 0,000286 | -0,07255 | 0,103 | 0,184 | 1 |
| Stoml1    | 0,000287 | -0,07754 | 0,189 | 0,289 | 1 |
| Noa1      | 0,000287 | -0,07981 | 0,163 | 0,257 | 1 |
| Orai1     | 0,000292 | -0,08074 | 0,128 | 0,215 | 1 |
| C2cd2     | 0,000295 | -0,06375 | 0,16  | 0,259 | 1 |
| Hscb      | 0,000295 | -0,08375 | 0,176 | 0,272 | 1 |
| Ebna1bp2  | 0,000296 | -0,07168 | 0,422 | 0,565 | 1 |
| Anxa4     | 0,000296 | 0,136048 | 0,312 | 0,219 | 1 |
| Sub1      | 0,000297 | -0,09889 | 0,672 | 0,789 | 1 |
| Psmb6     | 0,000297 | -0,10236 | 0,945 | 0,962 | 1 |
| Glmn      | 0,000297 | -0,06609 | 0,105 | 0,188 | 1 |
| Ak1       | 0,000297 | -0,09228 | 0,189 | 0,285 | 1 |

|          |          |          |       |       |   |
|----------|----------|----------|-------|-------|---|
| Dhfr     | 0,000298 | -0,04801 | 0,117 | 0,207 | 1 |
| Rdm1     | 0,000299 | -0,06632 | 0,13  | 0,219 | 1 |
| Mzt2     | 0,000303 | -0,08586 | 0,138 | 0,224 | 1 |
| Hacl1    | 0,000303 | -0,0666  | 0,103 | 0,184 | 1 |
| Nipsnap1 | 0,000305 | -0,05592 | 0,11  | 0,196 | 1 |
| Cox10    | 0,000307 | -0,06688 | 0,083 | 0,156 | 1 |
| Rnf6     | 0,000307 | -0,08732 | 0,295 | 0,409 | 1 |
| Mylpf    | 0,000308 | -0,07326 | 0,119 | 0,205 | 1 |
| Gm45871  | 0,000308 | -0,05399 | 0,046 | 0,105 | 1 |
| Oxct1    | 0,000308 | -0,10244 | 0,582 | 0,705 | 1 |
| Vma21    | 0,000309 | -0,08801 | 0,596 | 0,722 | 1 |
| Zfp729a  | 0,00031  | -0,08193 | 0,217 | 0,323 | 1 |
| Tmem238  | 0,000311 | -0,09681 | 0,125 | 0,207 | 1 |
| Garem1   | 0,000311 | -0,0745  | 0,112 | 0,194 | 1 |
| Lzic     | 0,000312 | -0,07974 | 0,141 | 0,23  | 1 |
| Tmbim6   | 0,000312 | -0,07364 | 1     | 0,998 | 1 |
| 1810043G | 0,000313 | -0,13533 | 0,194 | 0,287 | 1 |
| Kxd1     | 0,000313 | -0,08564 | 0,396 | 0,519 | 1 |
| Tagln2   | 0,000314 | 0,125948 | 0,339 | 0,232 | 1 |
| Slx4ip   | 0,000314 | -0,06048 | 0,095 | 0,175 | 1 |
| Dph7     | 0,000314 | -0,07047 | 0,134 | 0,222 | 1 |
| Pms1     | 0,000316 | -0,06758 | 0,105 | 0,186 | 1 |
| Rps15a   | 0,000317 | -0,07718 | 0,976 | 0,989 | 1 |
| Parp3    | 0,000317 | 0,143645 | 0,207 | 0,127 | 1 |
| Retreg3  | 0,000319 | 0,167786 | 0,694 | 0,648 | 1 |
| Tgfbrap1 | 0,000319 | -0,06687 | 0,288 | 0,409 | 1 |
| Polr3c   | 0,000319 | -0,06048 | 0,106 | 0,188 | 1 |
| Nt5c3    | 0,00032  | -0,05752 | 0,424 | 0,58  | 1 |
| Rpp40    | 0,000321 | -0,05954 | 0,062 | 0,129 | 1 |
| Ten1     | 0,000321 | -0,09257 | 0,538 | 0,66  | 1 |
| Bmpr2    | 0,000322 | 0,166463 | 0,604 | 0,553 | 1 |
| Wdr91    | 0,000323 | -0,08425 | 0,398 | 0,527 | 1 |
| Pak1ip1  | 0,000323 | -0,08426 | 0,339 | 0,464 | 1 |
| Mpp1     | 0,000324 | -0,07855 | 0,128 | 0,213 | 1 |
| Leo1     | 0,000324 | -0,08401 | 0,262 | 0,378 | 1 |
| Abtb2    | 0,000325 | -0,05406 | 0,161 | 0,259 | 1 |
| Eif4b    | 0,000326 | 0,151409 | 0,736 | 0,703 | 1 |
| Rnf135   | 0,000329 | -0,07093 | 0,117 | 0,2   | 1 |
| Kpna4    | 0,000329 | 0,156567 | 0,602 | 0,538 | 1 |
| Snrnp40  | 0,00033  | -0,08328 | 0,284 | 0,397 | 1 |
| Atp5s    | 0,00033  | -0,08779 | 0,141 | 0,228 | 1 |
| Nsfl1c   | 0,000332 | -0,09965 | 0,6   | 0,732 | 1 |
| AW146154 | 0,000333 | -0,06612 | 0,073 | 0,143 | 1 |
| Snrpd1   | 0,000334 | -0,07751 | 0,517 | 0,648 | 1 |
| Nkap     | 0,000334 | -0,07991 | 0,481 | 0,622 | 1 |
| Zmat1    | 0,000334 | -0,08632 | 0,295 | 0,416 | 1 |
| Rdh5     | 0,000335 | -0,06024 | 0,072 | 0,141 | 1 |
| Cops2    | 0,000335 | -0,07079 | 0,519 | 0,667 | 1 |
| Fam129b  | 0,000336 | 0,096202 | 0,161 | 0,089 | 1 |
| Oraov1   | 0,000338 | -0,08501 | 0,169 | 0,262 | 1 |
| Hdgf     | 0,000338 | -0,09405 | 0,844 | 0,901 | 1 |
| Golt1b   | 0,00034  | -0,0858  | 0,312 | 0,43  | 1 |

|           |          |          |       |       |   |
|-----------|----------|----------|-------|-------|---|
| Zfp639    | 0,000341 | -0,06622 | 0,321 | 0,454 | 1 |
| Utp23     | 0,000341 | -0,0633  | 0,134 | 0,222 | 1 |
| Capn10    | 0,000341 | -0,06829 | 0,163 | 0,259 | 1 |
| Zfp81     | 0,000341 | -0,08045 | 0,117 | 0,198 | 1 |
| Xbp1      | 0,000342 | -0,08947 | 0,505 | 0,633 | 1 |
| Hip1r     | 0,000346 | 0,188832 | 0,552 | 0,489 | 1 |
| Cbwd1     | 0,000348 | -0,06943 | 0,114 | 0,196 | 1 |
| Plcd4     | 0,000348 | -0,03322 | 0,011 | 0,049 | 1 |
| Actn4     | 0,000348 | 0,152809 | 0,848 | 0,8   | 1 |
| Akr1b3    | 0,000349 | -0,09479 | 0,543 | 0,681 | 1 |
| Fam45a    | 0,000349 | -0,07402 | 0,316 | 0,441 | 1 |
| St13      | 0,000349 | -0,06552 | 0,982 | 0,998 | 1 |
| mt-Co2    | 0,00035  | -0,0681  | 1     | 1     | 1 |
| Arhgdig   | 0,000352 | -0,02294 | 0     | 0,023 | 1 |
| Apoc1     | 0,000352 | -0,02706 | 0     | 0,023 | 1 |
| Acsl6     | 0,000352 | -0,02706 | 0     | 0,023 | 1 |
| Uba2      | 0,000352 | -0,09008 | 0,572 | 0,7   | 1 |
| Pofut2    | 0,000353 | -0,07531 | 0,259 | 0,376 | 1 |
| Zfp952    | 0,000354 | -0,05899 | 0,094 | 0,171 | 1 |
| 6430503K  | 0,000357 | -0,07283 | 0,134 | 0,219 | 1 |
| Yjefn3    | 0,000357 | -0,06289 | 0,075 | 0,146 | 1 |
| 2810402E2 | 0,000357 | -0,04476 | 0,072 | 0,143 | 1 |
| Gdap10    | 0,000358 | 0,15934  | 0,178 | 0,105 | 1 |
| Zmpste24  | 0,000358 | -0,04565 | 0,352 | 0,504 | 1 |
| Cul4b     | 0,000358 | -0,06848 | 0,099 | 0,177 | 1 |
| Szt2      | 0,000359 | -0,07    | 0,103 | 0,181 | 1 |
| Etnk1     | 0,000359 | 0,135976 | 0,939 | 0,911 | 1 |
| Dnaja4    | 0,00036  | -0,07395 | 0,105 | 0,184 | 1 |
| Wipf2     | 0,00036  | -0,07357 | 0,352 | 0,494 | 1 |
| Gon4l     | 0,000362 | -0,06566 | 0,323 | 0,454 | 1 |
| Erbp4     | 0,000363 | -0,08697 | 0,244 | 0,354 | 1 |
| Dgat2     | 0,000364 | 0,117822 | 0,319 | 0,222 | 1 |
| Acot6     | 0,000366 | -0,05497 | 0,084 | 0,158 | 1 |
| Bmp2k     | 0,000367 | 0,126417 | 0,921 | 0,888 | 1 |
| Ypel5     | 0,00037  | -0,07107 | 0,385 | 0,536 | 1 |
| Arhgap29  | 0,00037  | 0,045889 | 0,037 | 0,004 | 1 |
| Hnrnpul2  | 0,00037  | 0,168837 | 0,73  | 0,671 | 1 |
| Lactb     | 0,00037  | -0,07586 | 0,141 | 0,232 | 1 |
| Cntfr     | 0,000371 | 0,188356 | 0,459 | 0,378 | 1 |
| Fastk     | 0,000372 | -0,06312 | 0,244 | 0,357 | 1 |
| Tpgs1     | 0,000375 | -0,07835 | 0,505 | 0,658 | 1 |
| Phc3      | 0,000376 | 0,16932  | 0,635 | 0,591 | 1 |
| Ccdc66    | 0,00038  | -0,07438 | 0,308 | 0,435 | 1 |
| 5330434G  | 0,000381 | -0,05015 | 0,308 | 0,437 | 1 |
| 2310009B  | 0,000382 | -0,06459 | 0,086 | 0,16  | 1 |
| Ccdc34    | 0,000382 | -0,0633  | 0,411 | 0,557 | 1 |
| Immp2l    | 0,000383 | -0,05226 | 0,064 | 0,131 | 1 |
| Amz2      | 0,000388 | -0,07012 | 0,294 | 0,411 | 1 |
| C330018D  | 0,000388 | -0,05669 | 0,106 | 0,188 | 1 |
| Gemin2    | 0,00039  | -0,07162 | 0,125 | 0,209 | 1 |
| Uba5      | 0,00039  | -0,06354 | 0,44  | 0,595 | 1 |
| Utp3      | 0,000391 | -0,06387 | 0,266 | 0,384 | 1 |



|          |          |          |       |       |   |
|----------|----------|----------|-------|-------|---|
| A830052D | 0,000392 | -0,05013 | 0,022 | 0,068 | 1 |
| Mterf2   | 0,000394 | -0,05823 | 0,051 | 0,112 | 1 |
| Sh3glb1  | 0,000396 | -0,08344 | 0,983 | 0,996 | 1 |
| Rilpl1   | 0,000396 | -0,08401 | 0,332 | 0,458 | 1 |
| Idua     | 0,000397 | -0,05926 | 0,077 | 0,148 | 1 |
| Mrpl3    | 0,000398 | -0,07986 | 0,288 | 0,401 | 1 |
| Ergic2   | 0,000399 | -0,08582 | 0,569 | 0,696 | 1 |
| 1110034G | 0,000403 | -0,06801 | 0,176 | 0,272 | 1 |
| Zfp2     | 0,000403 | -0,06767 | 0,161 | 0,259 | 1 |
| Mtrr     | 0,000404 | -0,06697 | 0,105 | 0,184 | 1 |
| Gm34590  | 0,000404 | -0,05226 | 0,055 | 0,118 | 1 |
| Nudt22   | 0,000405 | -0,0641  | 0,11  | 0,19  | 1 |
| Abcf2    | 0,000406 | -0,07523 | 0,215 | 0,319 | 1 |
| Creg1    | 0,000407 | -0,06577 | 0,264 | 0,386 | 1 |
| Zfp182   | 0,000407 | -0,06451 | 0,217 | 0,331 | 1 |
| Acadvl   | 0,00041  | -0,0896  | 0,429 | 0,57  | 1 |
| Stau1    | 0,000411 | -0,06538 | 0,336 | 0,462 | 1 |
| Pfn4     | 0,000411 | -0,06323 | 0,061 | 0,124 | 1 |
| Msi2     | 0,000411 | 0,174502 | 0,67  | 0,616 | 1 |
| Sept8    | 0,000412 | -0,08551 | 0,993 | 0,989 | 1 |
| Syp      | 0,000413 | 0,134166 | 0,259 | 0,173 | 1 |
| Slc25a35 | 0,000416 | -0,04216 | 0,037 | 0,091 | 1 |
| Fundc1   | 0,000417 | -0,08803 | 0,341 | 0,466 | 1 |
| C87436   | 0,000417 | -0,06873 | 0,233 | 0,346 | 1 |
| Mettl25  | 0,000418 | -0,07278 | 0,11  | 0,19  | 1 |
| Sfmbt1   | 0,000419 | -0,059   | 0,11  | 0,192 | 1 |
| Mdh2     | 0,00042  | -0,09707 | 0,82  | 0,899 | 1 |
| Per3     | 0,000421 | -0,0444  | 0,187 | 0,291 | 1 |
| Chpt1    | 0,000421 | -0,12642 | 0,743 | 0,819 | 1 |
| Cdip1    | 0,000423 | 0,126496 | 0,848 | 0,812 | 1 |
| Gle1     | 0,000424 | -0,07322 | 0,354 | 0,483 | 1 |
| Slc25a25 | 0,000424 | -0,04479 | 0,042 | 0,099 | 1 |
| Syt4     | 0,000426 | 0,334087 | 0,04  | 0,006 | 1 |
| Thoc5    | 0,000426 | -0,06982 | 0,16  | 0,253 | 1 |
| Akap6    | 0,000427 | -0,04569 | 0,376 | 0,53  | 1 |
| Crebzf   | 0,00043  | -0,09785 | 0,578 | 0,719 | 1 |
| Rnf26    | 0,000431 | -0,07619 | 0,143 | 0,23  | 1 |
| Gm16168  | 0,000434 | -0,05103 | 0,119 | 0,205 | 1 |
| Ccdc77   | 0,000435 | -0,05063 | 0,13  | 0,219 | 1 |
| Gm36839  | 0,000436 | 0,081938 | 0,086 | 0,034 | 1 |
| Pggt1b   | 0,000437 | -0,07162 | 0,121 | 0,205 | 1 |
| Sh3gl1   | 0,000437 | -0,07162 | 0,299 | 0,418 | 1 |
| Ctsd     | 0,000437 | 0,116018 | 0,989 | 0,981 | 1 |
| Atp2c1   | 0,000438 | -0,09843 | 0,89  | 0,918 | 1 |
| Gm47101  | 0,000439 | 0,042743 | 0,031 | 0,002 | 1 |
| Gm38534  | 0,00044  | 0,037466 | 0,031 | 0,002 | 1 |
| Sh3rf1   | 0,000441 | -0,05384 | 0,046 | 0,103 | 1 |
| Ckb      | 0,000443 | -0,13195 | 0,996 | 0,998 | 1 |
| Luzp2    | 0,000444 | -0,1325  | 0,314 | 0,42  | 1 |
| Gm45518  | 0,000446 | 0,057056 | 0,026 | 0     | 1 |
| Slc6a7   | 0,000446 | 0,057056 | 0,026 | 0     | 1 |
| Pa2g4    | 0,000447 | -0,10118 | 0,637 | 0,747 | 1 |

|           |          |          |       |       |   |
|-----------|----------|----------|-------|-------|---|
| Syne3     | 0,00045  | -0,05855 | 0,07  | 0,137 | 1 |
| Rab30     | 0,000452 | -0,0757  | 0,211 | 0,314 | 1 |
| Psm4      | 0,000453 | -0,09823 | 0,824 | 0,905 | 1 |
| Jph1      | 0,000454 | -0,09264 | 0,483 | 0,616 | 1 |
| Cops8     | 0,000455 | -0,09715 | 0,523 | 0,643 | 1 |
| Pld3      | 0,000456 | -0,06323 | 0,303 | 0,432 | 1 |
| Foxred1   | 0,000457 | -0,0708  | 0,172 | 0,266 | 1 |
| Slc37a3   | 0,000457 | -0,06131 | 0,204 | 0,312 | 1 |
| Csnk2b    | 0,000458 | -0,09914 | 0,714 | 0,816 | 1 |
| Dstyk     | 0,000459 | 0,169759 | 0,76  | 0,762 | 1 |
| Rpap3     | 0,000459 | -0,06673 | 0,172 | 0,266 | 1 |
| Rtca      | 0,000459 | -0,06321 | 0,18  | 0,278 | 1 |
| Zfp62     | 0,000459 | -0,05974 | 0,317 | 0,451 | 1 |
| Nap1l1    | 0,00046  | 0,174827 | 0,752 | 0,7   | 1 |
| Gm15972   | 0,000462 | -0,04391 | 0,024 | 0,07  | 1 |
| Ubx2a     | 0,000463 | -0,06802 | 0,284 | 0,407 | 1 |
| B230307C  | 0,000463 | -0,08074 | 0,136 | 0,219 | 1 |
| Phospho2  | 0,000464 | -0,07494 | 0,141 | 0,228 | 1 |
| Gm16141   | 0,000465 | -0,04997 | 0,024 | 0,07  | 1 |
| Ndufaf1   | 0,000466 | -0,07    | 0,105 | 0,181 | 1 |
| Slc4a4    | 0,000467 | -0,04152 | 0,002 | 0,027 | 1 |
| Hnmt      | 0,000468 | -0,02727 | 0,002 | 0,027 | 1 |
| Ernard    | 0,000468 | -0,10381 | 0,191 | 0,287 | 1 |
| Gm42205   | 0,000468 | -0,02522 | 0,002 | 0,027 | 1 |
| Zmat3     | 0,000469 | -0,05203 | 0,174 | 0,276 | 1 |
| Patz1     | 0,00047  | -0,06807 | 0,251 | 0,365 | 1 |
| E130102H  | 0,00047  | -0,06679 | 0,2   | 0,304 | 1 |
| Ccdc58    | 0,000473 | -0,06268 | 0,136 | 0,224 | 1 |
| Casc4     | 0,000473 | -0,10591 | 0,217 | 0,321 | 1 |
| Pole3     | 0,000473 | -0,0676  | 0,317 | 0,437 | 1 |
| Slc5a11   | 0,000475 | -0,04126 | 0,028 | 0,076 | 1 |
| Hars2     | 0,000477 | -0,0715  | 0,128 | 0,211 | 1 |
| Tnfsf12   | 0,000477 | 0,078792 | 0,119 | 0,057 | 1 |
| Tmem251   | 0,000477 | -0,06017 | 0,158 | 0,251 | 1 |
| Unc5b     | 0,000478 | 0,123641 | 0,965 | 0,943 | 1 |
| Cwc15     | 0,000478 | -0,09744 | 0,888 | 0,924 | 1 |
| Rpgr      | 0,000478 | -0,0665  | 0,077 | 0,146 | 1 |
| Ankrd26   | 0,000478 | -0,08517 | 0,273 | 0,384 | 1 |
| Lin37     | 0,000478 | -0,06676 | 0,158 | 0,249 | 1 |
| Cntrl     | 0,00048  | -0,06987 | 0,295 | 0,414 | 1 |
| Tvp23a    | 0,00048  | -0,04949 | 0,07  | 0,137 | 1 |
| Dhps      | 0,00048  | -0,08262 | 0,367 | 0,494 | 1 |
| 9430065F1 | 0,000481 | -0,04811 | 0,04  | 0,095 | 1 |
| Amd2      | 0,000482 | 0,196894 | 0,833 | 0,816 | 1 |
| Prmt9     | 0,000485 | -0,04823 | 0,112 | 0,194 | 1 |
| Nrtn      | 0,000486 | -0,10616 | 0,108 | 0,186 | 1 |
| Tmem8b    | 0,000487 | -0,07393 | 0,161 | 0,253 | 1 |
| Relb      | 0,00049  | -0,0707  | 0,106 | 0,184 | 1 |
| Prickle3  | 0,00049  | 0,047586 | 0,112 | 0,051 | 1 |
| Snf8      | 0,000492 | -0,0851  | 0,56  | 0,688 | 1 |
| Trib2     | 0,000493 | -0,0457  | 0,017 | 0,057 | 1 |
| Sall1     | 0,000495 | -0,10346 | 0,356 | 0,47  | 1 |

|             |          |          |       |       |   |
|-------------|----------|----------|-------|-------|---|
| Oma1        | 0,000498 | -0,06632 | 0,13  | 0,215 | 1 |
| Prmt2       | 0,0005   | -0,08389 | 0,44  | 0,572 | 1 |
| Tsix        | 0,000503 | 0,179612 | 0,29  | 0,205 | 1 |
| Mphosph1    | 0,000505 | -0,04637 | 0,334 | 0,47  | 1 |
| Birc2       | 0,000505 | -0,06155 | 0,325 | 0,46  | 1 |
| Baalc       | 0,000506 | -0,03157 | 0,004 | 0,032 | 1 |
| Larp1       | 0,000506 | 0,172281 | 0,604 | 0,551 | 1 |
| Pign        | 0,000508 | -0,05442 | 0,183 | 0,285 | 1 |
| Tmem27      | 0,000509 | -0,02814 | 0,006 | 0,036 | 1 |
| Zfp37       | 0,000509 | -0,05411 | 0,215 | 0,321 | 1 |
| Spock2      | 0,00051  | -0,02749 | 0,004 | 0,032 | 1 |
| Sod2        | 0,000511 | -0,09724 | 0,505 | 0,618 | 1 |
| Tmf1        | 0,000511 | -0,10531 | 0,725 | 0,8   | 1 |
| Rnf32       | 0,000512 | -0,05635 | 0,05  | 0,108 | 1 |
| Nhlrc3      | 0,000518 | -0,07546 | 0,123 | 0,205 | 1 |
| Pigx        | 0,000519 | -0,04584 | 0,125 | 0,211 | 1 |
| Mul1        | 0,00052  | -0,06547 | 0,217 | 0,321 | 1 |
| Ptpn11      | 0,00052  | 0,127192 | 0,894 | 0,861 | 1 |
| Zfp438      | 0,000521 | -0,05752 | 0,103 | 0,181 | 1 |
| Synj2bp     | 0,000522 | -0,08412 | 0,277 | 0,388 | 1 |
| Cep19       | 0,000522 | -0,04794 | 0,04  | 0,095 | 1 |
| Armt1       | 0,000522 | -0,04891 | 0,101 | 0,179 | 1 |
| Gtf3c6      | 0,000525 | -0,08933 | 0,371 | 0,489 | 1 |
| Gabbr1      | 0,000525 | -0,08106 | 0,969 | 0,979 | 1 |
| Pes1        | 0,000526 | -0,06245 | 0,231 | 0,335 | 1 |
| Otud6b      | 0,000526 | -0,08091 | 0,378 | 0,504 | 1 |
| Jmjd8       | 0,000528 | -0,06498 | 0,117 | 0,198 | 1 |
| Yars2       | 0,00053  | -0,05598 | 0,094 | 0,169 | 1 |
| Pms2        | 0,000532 | -0,0496  | 0,169 | 0,266 | 1 |
| Tmub2       | 0,000535 | -0,0799  | 0,332 | 0,447 | 1 |
| Atxn10      | 0,00054  | -0,09696 | 0,758 | 0,821 | 1 |
| Aamp        | 0,000544 | -0,09729 | 0,894 | 0,897 | 1 |
| Mccc2       | 0,000544 | -0,07344 | 0,123 | 0,203 | 1 |
| 1700066M    | 0,000544 | -0,07956 | 0,235 | 0,34  | 1 |
| Mkrn2       | 0,000545 | -0,08608 | 0,312 | 0,424 | 1 |
| AI413582    | 0,000546 | -0,08178 | 0,494 | 0,637 | 1 |
| Zfp770      | 0,000546 | -0,07534 | 0,158 | 0,247 | 1 |
| Mrpl33      | 0,000547 | -0,09937 | 0,655 | 0,749 | 1 |
| Ppm1g       | 0,000552 | -0,05215 | 0,385 | 0,534 | 1 |
| Pwp1        | 0,000553 | -0,06292 | 0,172 | 0,268 | 1 |
| Bcl7b       | 0,000554 | -0,08723 | 0,481 | 0,624 | 1 |
| Hus1        | 0,000558 | -0,05809 | 0,198 | 0,3   | 1 |
| Mrpl45      | 0,000558 | -0,08949 | 0,226 | 0,323 | 1 |
| Zfp612      | 0,000558 | -0,06722 | 0,2   | 0,302 | 1 |
| Gpx1        | 0,000559 | -0,16621 | 0,165 | 0,253 | 1 |
| Mrpl44      | 0,000562 | -0,05995 | 0,092 | 0,165 | 1 |
| Psma4       | 0,000562 | -0,10318 | 0,723 | 0,814 | 1 |
| Dbp         | 0,000567 | -0,08119 | 0,163 | 0,253 | 1 |
| AU040972    | 0,000568 | -0,03442 | 0,011 | 0,046 | 1 |
| Pim1        | 0,000568 | 0,086448 | 0,062 | 0,019 | 1 |
| Olfr718-ps: | 0,00057  | 0,055797 | 0,059 | 0,017 | 1 |
| Dgcr14      | 0,00057  | -0,0671  | 0,112 | 0,19  | 1 |

|          |          |          |       |       |   |
|----------|----------|----------|-------|-------|---|
| Clint1   | 0,00057  | -0,05677 | 0,262 | 0,38  | 1 |
| Sav1     | 0,000571 | -0,08822 | 0,277 | 0,382 | 1 |
| Hnrnpu   | 0,000572 | 0,110499 | 0,983 | 0,97  | 1 |
| Pus1     | 0,000574 | -0,06127 | 0,117 | 0,198 | 1 |
| Pik3r4   | 0,000574 | -0,05865 | 0,16  | 0,253 | 1 |
| Lysmd4   | 0,000577 | -0,07141 | 0,101 | 0,175 | 1 |
| Hmgb1    | 0,000578 | -0,05245 | 0,998 | 0,996 | 1 |
| Decr1    | 0,000578 | -0,06924 | 0,206 | 0,306 | 1 |
| Nsmaf    | 0,000584 | -0,05035 | 0,138 | 0,226 | 1 |
| Smu1     | 0,000585 | -0,08657 | 0,428 | 0,553 | 1 |
| Zfp384   | 0,000585 | -0,05498 | 0,141 | 0,23  | 1 |
| Atg16l1  | 0,000587 | -0,0885  | 0,264 | 0,371 | 1 |
| Larp4    | 0,000589 | 0,174394 | 0,572 | 0,525 | 1 |
| Dusp12   | 0,000589 | -0,06479 | 0,191 | 0,289 | 1 |
| Txnrd2   | 0,00059  | -0,06523 | 0,128 | 0,211 | 1 |
| Casp9    | 0,000594 | -0,06195 | 0,165 | 0,257 | 1 |
| Fam241a  | 0,000605 | -0,06775 | 0,228 | 0,331 | 1 |
| Tmem170  | 0,000605 | -0,06108 | 0,145 | 0,232 | 1 |
| Maged1   | 0,000606 | 0,151551 | 0,646 | 0,599 | 1 |
| Rnf14    | 0,000607 | -0,09163 | 0,512 | 0,631 | 1 |
| Cxcl14   | 0,000607 | -0,03601 | 0,011 | 0,046 | 1 |
| Plekhn1  | 0,000607 | -0,05457 | 0,237 | 0,348 | 1 |
| Pepd     | 0,000608 | -0,09513 | 0,486 | 0,618 | 1 |
| Ormdl1   | 0,000611 | -0,08215 | 0,183 | 0,276 | 1 |
| Pgm3     | 0,000611 | -0,06105 | 0,231 | 0,34  | 1 |
| Fam43a   | 0,000611 | -0,06547 | 0,039 | 0,091 | 1 |
| Dnpep    | 0,000612 | -0,06206 | 0,312 | 0,432 | 1 |
| Exoc8    | 0,000614 | -0,0651  | 0,123 | 0,205 | 1 |
| Magi2    | 0,000614 | 0,128878 | 0,936 | 0,899 | 1 |
| Pfn1     | 0,000615 | -0,06281 | 0,983 | 0,985 | 1 |
| Tysnd1   | 0,000615 | -0,06662 | 0,193 | 0,287 | 1 |
| Thap2    | 0,000615 | -0,06699 | 0,472 | 0,599 | 1 |
| Ptk2     | 0,000616 | -0,09271 | 0,712 | 0,806 | 1 |
| BC022687 | 0,000616 | -0,03978 | 0,022 | 0,065 | 1 |
| Ahcy     | 0,000619 | -0,0412  | 0,018 | 0,059 | 1 |
| Ubap1    | 0,000623 | -0,08249 | 0,352 | 0,475 | 1 |
| Zfp160   | 0,000626 | -0,07201 | 0,211 | 0,312 | 1 |
| Afg3l1   | 0,000626 | -0,06108 | 0,415 | 0,549 | 1 |
| Srsf10   | 0,000628 | 0,155454 | 0,653 | 0,603 | 1 |
| Get4     | 0,000634 | -0,07901 | 0,536 | 0,662 | 1 |
| Fam172a  | 0,000635 | -0,07603 | 0,536 | 0,684 | 1 |
| Gtf2e2   | 0,000638 | -0,09042 | 0,22  | 0,312 | 1 |
| Inip     | 0,00064  | -0,07578 | 0,13  | 0,211 | 1 |
| Rab12    | 0,000641 | -0,06887 | 0,339 | 0,464 | 1 |
| Pdia3    | 0,000641 | -0,09996 | 0,958 | 0,954 | 1 |
| Rnf168   | 0,000642 | -0,05069 | 0,306 | 0,432 | 1 |
| Mat2a    | 0,000643 | -0,10781 | 0,98  | 0,968 | 1 |
| Thap12   | 0,000648 | -0,07879 | 0,312 | 0,424 | 1 |
| Azin1    | 0,000649 | 0,173455 | 0,451 | 0,384 | 1 |
| Lman2l   | 0,000653 | -0,06882 | 0,193 | 0,289 | 1 |
| Numb     | 0,000655 | -0,06302 | 0,204 | 0,304 | 1 |
| Rnaseh2c | 0,000655 | -0,0943  | 0,49  | 0,61  | 1 |

|           |          |          |       |       |   |
|-----------|----------|----------|-------|-------|---|
| 4921504A  | 0,000655 | -0,08157 | 0,114 | 0,19  | 1 |
| Abcd3     | 0,000657 | -0,09213 | 0,42  | 0,546 | 1 |
| Snta1     | 0,000661 | -0,06615 | 0,18  | 0,276 | 1 |
| Tshz2     | 0,000661 | -0,02294 | 0     | 0,021 | 1 |
| Prkce     | 0,000661 | 0,06959  | 0,075 | 0,027 | 1 |
| Rab3gap1  | 0,000669 | -0,04585 | 0,402 | 0,553 | 1 |
| Wdr35     | 0,000671 | -0,07823 | 0,099 | 0,171 | 1 |
| A430046D  | 0,000673 | -0,05381 | 0,062 | 0,124 | 1 |
| Trim46    | 0,000673 | 0,080308 | 0,09  | 0,038 | 1 |
| Zfp973    | 0,000677 | -0,04692 | 0,033 | 0,082 | 1 |
| Polr3a    | 0,00068  | -0,06016 | 0,176 | 0,27  | 1 |
| Fam219b   | 0,000681 | -0,06839 | 0,204 | 0,304 | 1 |
| Cyp39a1   | 0,000682 | -0,06794 | 0,116 | 0,194 | 1 |
| Ceacam1   | 0,000686 | -0,05272 | 0,044 | 0,099 | 1 |
| Grid2     | 0,00069  | -0,09254 | 0,253 | 0,35  | 1 |
| Mrpl22    | 0,000691 | -0,05645 | 0,183 | 0,281 | 1 |
| Ogt       | 0,000691 | -0,08771 | 0,789 | 0,867 | 1 |
| Usp30     | 0,000691 | -0,06384 | 0,394 | 0,534 | 1 |
| Dnajc10   | 0,000692 | -0,08005 | 0,301 | 0,416 | 1 |
| Pigc      | 0,000696 | -0,06706 | 0,127 | 0,209 | 1 |
| Trpv2     | 0,000698 | 0,055664 | 0,072 | 0,025 | 1 |
| Ap5z1     | 0,000698 | -0,06802 | 0,244 | 0,352 | 1 |
| Mrpl17    | 0,000699 | -0,09084 | 0,53  | 0,656 | 1 |
| Arf2      | 0,000701 | -0,06611 | 0,237 | 0,344 | 1 |
| Parn      | 0,000702 | -0,05911 | 0,29  | 0,405 | 1 |
| Cul2      | 0,000708 | -0,05527 | 0,213 | 0,319 | 1 |
| Mybphl    | 0,000708 | 0,037466 | 0,029 | 0,002 | 1 |
| Trappc9   | 0,000716 | -0,0576  | 0,284 | 0,407 | 1 |
| Slc45a3   | 0,000717 | -0,09022 | 0,198 | 0,291 | 1 |
| Mettl3    | 0,000719 | -0,0806  | 0,202 | 0,295 | 1 |
| Pafah1b2  | 0,000728 | -0,09883 | 0,853 | 0,886 | 1 |
| Rhbdd1    | 0,000728 | -0,05446 | 0,11  | 0,188 | 1 |
| Pigk      | 0,000728 | -0,07043 | 0,424 | 0,563 | 1 |
| Diaph2    | 0,000729 | -0,08623 | 0,187 | 0,281 | 1 |
| Zmat2     | 0,000731 | -0,08677 | 0,855 | 0,884 | 1 |
| Irf2bp1   | 0,000732 | -0,0633  | 0,325 | 0,443 | 1 |
| Chmp7     | 0,000736 | -0,08014 | 0,749 | 0,871 | 1 |
| Zbtb42    | 0,000738 | 0,039607 | 0,039 | 0,006 | 1 |
| Mrpl4     | 0,000742 | -0,08587 | 0,303 | 0,411 | 1 |
| Acrbp     | 0,000743 | -0,06663 | 0,077 | 0,143 | 1 |
| Myc       | 0,000747 | 0,115568 | 0,081 | 0,032 | 1 |
| Hnrnp2    | 0,000747 | -0,09394 | 0,721 | 0,829 | 1 |
| Polr2a    | 0,000747 | 0,17844  | 0,547 | 0,511 | 1 |
| Lsm4      | 0,000749 | -0,09199 | 0,624 | 0,732 | 1 |
| Srr       | 0,00075  | -0,06696 | 0,18  | 0,272 | 1 |
| Ubl3      | 0,000751 | -0,10334 | 0,941 | 0,97  | 1 |
| Fpgt      | 0,000755 | -0,07563 | 0,191 | 0,283 | 1 |
| Vps8      | 0,000756 | -0,0726  | 0,347 | 0,464 | 1 |
| Ap1s1     | 0,000757 | -0,08938 | 0,327 | 0,437 | 1 |
| Nr2f6     | 0,000758 | -0,06473 | 0,121 | 0,2   | 1 |
| Hist2h3c1 | 0,000759 | -0,0441  | 0,053 | 0,112 | 1 |
| Peg3      | 0,00076  | -0,08933 | 0,292 | 0,407 | 1 |

|           |          |          |       |       |   |
|-----------|----------|----------|-------|-------|---|
| Tmem18    | 0,000761 | -0,07092 | 0,152 | 0,238 | 1 |
| Zfp74     | 0,000767 | -0,05811 | 0,191 | 0,287 | 1 |
| Adam23    | 0,000768 | -0,10143 | 0,33  | 0,449 | 1 |
| Babam1    | 0,000769 | -0,06108 | 0,378 | 0,515 | 1 |
| Ap2s1     | 0,000771 | -0,09688 | 0,837 | 0,886 | 1 |
| Stard5    | 0,000771 | -0,06438 | 0,121 | 0,2   | 1 |
| Pcbd2     | 0,000776 | -0,08199 | 0,196 | 0,287 | 1 |
| Dip2b     | 0,000781 | -0,08028 | 0,961 | 0,968 | 1 |
| 573040310 | 0,000783 | -0,03462 | 0,013 | 0,049 | 1 |
| Ctps2     | 0,00079  | -0,06293 | 0,141 | 0,226 | 1 |
| Dynlrb1   | 0,00079  | -0,09843 | 0,903 | 0,911 | 1 |
| Zfp35     | 0,000792 | -0,06275 | 0,081 | 0,148 | 1 |
| Hars      | 0,000795 | -0,07126 | 0,462 | 0,601 | 1 |
| Dpysl5    | 0,000798 | -0,06536 | 0,147 | 0,234 | 1 |
| Coro1b    | 0,000799 | -0,06582 | 0,393 | 0,525 | 1 |
| Chek2     | 0,000799 | 0,07806  | 0,13  | 0,068 | 1 |
| Ttc38     | 0,0008   | -0,06496 | 0,081 | 0,148 | 1 |
| Ndufa9    | 0,000801 | -0,07483 | 0,477 | 0,618 | 1 |
| Ddx21     | 0,000801 | -0,06015 | 0,306 | 0,42  | 1 |
| Arf4      | 0,000803 | -0,08926 | 0,703 | 0,768 | 1 |
| Manea     | 0,000804 | -0,05779 | 0,251 | 0,361 | 1 |
| Lyar      | 0,000805 | -0,06371 | 0,158 | 0,247 | 1 |
| Psma6     | 0,000812 | -0,09379 | 0,739 | 0,812 | 1 |
| Gk        | 0,000816 | -0,05165 | 0,062 | 0,124 | 1 |
| Crk       | 0,000816 | 0,147839 | 0,668 | 0,616 | 1 |
| Kpna3     | 0,000819 | -0,07367 | 0,391 | 0,523 | 1 |
| Mfsd13b   | 0,000819 | -0,03741 | 0,017 | 0,055 | 1 |
| Yipf5     | 0,00082  | -0,06017 | 0,527 | 0,679 | 1 |
| Eny2      | 0,000822 | -0,07327 | 0,611 | 0,745 | 1 |
| Ppp1r3f   | 0,000828 | -0,04813 | 0,072 | 0,137 | 1 |
| Wdr26     | 0,000829 | 0,147842 | 0,655 | 0,633 | 1 |
| Khdrbs1   | 0,000833 | 0,120908 | 0,826 | 0,783 | 1 |
| Lpar6     | 0,000837 | -0,04684 | 0,095 | 0,167 | 1 |
| Rfxap     | 0,000839 | -0,06134 | 0,306 | 0,42  | 1 |
| Mpdz      | 0,000839 | -0,06574 | 0,363 | 0,492 | 1 |
| Mterf3    | 0,000842 | -0,05355 | 0,248 | 0,359 | 1 |
| Nr4a3     | 0,000844 | 0,086893 | 0,05  | 0,013 | 1 |
| Ldlrad3   | 0,000844 | 0,175241 | 0,558 | 0,519 | 1 |
| Spopl     | 0,000846 | -0,05742 | 0,206 | 0,306 | 1 |
| Pstk      | 0,000847 | -0,07437 | 0,213 | 0,31  | 1 |
| Ptprs     | 0,000848 | 0,172254 | 0,385 | 0,312 | 1 |
| Dkc1      | 0,000851 | -0,05738 | 0,27  | 0,384 | 1 |
| Ggact     | 0,000852 | -0,07024 | 0,108 | 0,181 | 1 |
| Pdcd4     | 0,000858 | -0,08816 | 0,327 | 0,439 | 1 |
| Mospd2    | 0,000861 | -0,04681 | 0,319 | 0,443 | 1 |
| MacroD2   | 0,000861 | -0,05781 | 0,172 | 0,266 | 1 |
| Ngly1     | 0,000862 | -0,05554 | 0,251 | 0,363 | 1 |
| Ccdc51    | 0,000865 | -0,04409 | 0,026 | 0,07  | 1 |
| Fam181b   | 0,000867 | -0,02727 | 0,002 | 0,025 | 1 |
| Socs2     | 0,000876 | 0,059579 | 0,046 | 0,011 | 1 |
| Frmd4b    | 0,000876 | 0,144982 | 0,886 | 0,871 | 1 |
| Dusp16    | 0,000876 | -0,06236 | 0,374 | 0,5   | 1 |

|           |          |          |       |       |   |
|-----------|----------|----------|-------|-------|---|
| U2surp    | 0,000882 | 0,1361   | 0,82  | 0,795 | 1 |
| Stard4    | 0,000887 | 0,198939 | 0,325 | 0,249 | 1 |
| Wdr11     | 0,000889 | -0,06197 | 0,187 | 0,283 | 1 |
| 2900076A  | 0,000892 | -0,05428 | 0,13  | 0,211 | 1 |
| Gsta3     | 0,000892 | -0,04462 | 0,026 | 0,07  | 1 |
| Pnmal2    | 0,000893 | -0,04462 | 0,035 | 0,084 | 1 |
| Pfdn2     | 0,000894 | -0,0778  | 0,813 | 0,886 | 1 |
| Ube2e2    | 0,000899 | -0,07419 | 0,684 | 0,814 | 1 |
| Slc29a1   | 0,0009   | 0,047228 | 0,05  | 0,013 | 1 |
| Zfand1    | 0,000901 | -0,0572  | 0,094 | 0,165 | 1 |
| Cfap97    | 0,000901 | -0,05552 | 0,191 | 0,291 | 1 |
| Gm21988   | 0,000904 | -0,05446 | 0,053 | 0,11  | 1 |
| Ppfia2    | 0,000909 | -0,05337 | 0,039 | 0,089 | 1 |
| Itpk1     | 0,00091  | 0,150542 | 0,899 | 0,876 | 1 |
| Sirpa     | 0,000924 | 0,087081 | 0,128 | 0,068 | 1 |
| Smim15    | 0,000924 | -0,07604 | 0,754 | 0,823 | 1 |
| Rcc1      | 0,000924 | -0,06417 | 0,077 | 0,141 | 1 |
| Raly1     | 0,000927 | -0,04052 | 0,026 | 0,07  | 1 |
| Atp1b1    | 0,000927 | -0,02749 | 0,004 | 0,03  | 1 |
| Esrp1     | 0,000931 | -0,02545 | 0,004 | 0,03  | 1 |
| mt-Nd6    | 0,000934 | -0,08501 | 0,385 | 0,517 | 1 |
| Mgme1     | 0,000935 | -0,05299 | 0,158 | 0,247 | 1 |
| Rab3gap2  | 0,000938 | -0,06825 | 0,363 | 0,489 | 1 |
| Klhl22    | 0,00094  | -0,06008 | 0,105 | 0,177 | 1 |
| Rpl41     | 0,00094  | -0,05011 | 0,998 | 0,998 | 1 |
| Napg      | 0,000943 | -0,07459 | 0,398 | 0,532 | 1 |
| Cep57     | 0,000944 | -0,06212 | 0,136 | 0,217 | 1 |
| Arrdc2    | 0,000948 | -0,07197 | 0,338 | 0,466 | 1 |
| Mindy2    | 0,000948 | 0,160594 | 0,732 | 0,688 | 1 |
| Psmb8     | 0,000949 | 0,072627 | 0,033 | 0,004 | 1 |
| Timm29    | 0,00095  | -0,06139 | 0,244 | 0,344 | 1 |
| Cep192    | 0,00095  | -0,06413 | 0,119 | 0,196 | 1 |
| Sf1       | 0,00095  | 0,133242 | 0,681 | 0,629 | 1 |
| Clk4      | 0,000952 | 0,149615 | 0,75  | 0,736 | 1 |
| Pithd1    | 0,000952 | -0,09698 | 0,653 | 0,757 | 1 |
| Tpr       | 0,000953 | 0,145379 | 0,888 | 0,85  | 1 |
| Plekha3   | 0,000953 | -0,06615 | 0,194 | 0,289 | 1 |
| Fars2     | 0,000954 | -0,05839 | 0,163 | 0,249 | 1 |
| C920006O  | 0,000955 | -0,0647  | 0,073 | 0,137 | 1 |
| Ptpn1     | 0,000958 | -0,06836 | 0,284 | 0,395 | 1 |
| Irx5      | 0,000963 | 0,11017  | 0,099 | 0,046 | 1 |
| Ttc32     | 0,000963 | -0,05271 | 0,099 | 0,173 | 1 |
| Gm28172   | 0,000963 | -0,03818 | 0,022 | 0,063 | 1 |
| Nsmce2    | 0,000963 | -0,06446 | 0,407 | 0,544 | 1 |
| Ddx47     | 0,000964 | -0,07008 | 0,22  | 0,316 | 1 |
| Galk1     | 0,000964 | -0,04899 | 0,361 | 0,496 | 1 |
| Sun2      | 0,000965 | 0,14285  | 0,391 | 0,312 | 1 |
| Lonp2     | 0,000966 | -0,06266 | 0,387 | 0,517 | 1 |
| 2610008E1 | 0,000967 | -0,07459 | 0,24  | 0,34  | 1 |
| Usp12     | 0,000967 | -0,06749 | 0,15  | 0,234 | 1 |
| Tmem62    | 0,000968 | -0,07786 | 0,321 | 0,445 | 1 |
| Fkbp14    | 0,000971 | -0,0471  | 0,079 | 0,146 | 1 |

|            |          |          |       |       |   |
|------------|----------|----------|-------|-------|---|
| Cfl2       | 0,000971 | -0,04799 | 0,987 | 0,985 | 1 |
| C1ql3      | 0,000972 | -0,05026 | 0,103 | 0,177 | 1 |
| Dcp1a      | 0,000972 | -0,05323 | 0,193 | 0,289 | 1 |
| Ccdc22     | 0,000974 | -0,07437 | 0,22  | 0,316 | 1 |
| Adat2      | 0,000974 | -0,05002 | 0,046 | 0,099 | 1 |
| Ing4       | 0,000974 | -0,05436 | 0,49  | 0,643 | 1 |
| Enpp2      | 0,000977 | -0,06573 | 1     | 0,998 | 1 |
| Nudt13     | 0,000977 | -0,06296 | 0,33  | 0,458 | 1 |
| Zdhhc6     | 0,000979 | -0,05511 | 0,18  | 0,274 | 1 |
| Dgkz       | 0,000979 | 0,154207 | 0,461 | 0,392 | 1 |
| Tmem220    | 0,000979 | -0,05412 | 0,062 | 0,122 | 1 |
| Dcun1d1    | 0,000982 | -0,05236 | 0,369 | 0,504 | 1 |
| Uxt        | 0,000984 | -0,05455 | 0,193 | 0,289 | 1 |
| 5830454EC  | 0,000984 | -0,03462 | 0,011 | 0,044 | 1 |
| Eif2b2     | 0,000984 | -0,06636 | 0,294 | 0,407 | 1 |
| Acin1      | 0,000985 | 0,153173 | 0,807 | 0,787 | 1 |
| Asap1      | 0,000987 | -0,0734  | 0,306 | 0,424 | 1 |
| Trim3      | 0,000988 | -0,08101 | 0,51  | 0,637 | 1 |
| Slc7a1     | 0,00099  | 0,057204 | 0,073 | 0,027 | 1 |
| Vwa8       | 0,000992 | -0,06193 | 0,194 | 0,291 | 1 |
| Map2k2     | 0,000992 | -0,06846 | 0,822 | 0,88  | 1 |
| Tcf25      | 0,000998 | 0,112434 | 0,971 | 0,954 | 1 |
| 6330403K   | 0,001    | -0,02878 | 0,011 | 0,044 | 1 |
| Rbks       | 0,001    | -0,0734  | 0,101 | 0,171 | 1 |
| Txnip      | 0,001003 | 0,199947 | 0,479 | 0,411 | 1 |
| Naaladl2   | 0,001007 | -0,08089 | 0,106 | 0,177 | 1 |
| Hps4       | 0,001019 | -0,05515 | 0,167 | 0,255 | 1 |
| Nat8f4     | 0,001021 | -0,0308  | 0,011 | 0,044 | 1 |
| Gabra2     | 0,001022 | -0,02899 | 0,011 | 0,044 | 1 |
| D8Erttd738 | 0,001027 | -0,08143 | 0,903 | 0,903 | 1 |
| Zc2hc1a    | 0,001028 | -0,05839 | 0,149 | 0,234 | 1 |
| Mid2       | 0,001034 | 0,091815 | 0,119 | 0,061 | 1 |
| Nlgn1      | 0,001035 | -0,05352 | 0,033 | 0,08  | 1 |
| Nmrk1      | 0,001035 | -0,07126 | 0,134 | 0,213 | 1 |
| Rpp38      | 0,001035 | -0,06483 | 0,081 | 0,146 | 1 |
| Pcnx4      | 0,001036 | -0,0475  | 0,147 | 0,232 | 1 |
| Eci2       | 0,001043 | -0,0705  | 0,343 | 0,466 | 1 |
| Nipal3     | 0,001044 | -0,09245 | 0,428 | 0,54  | 1 |
| Isoc2b     | 0,00105  | -0,03522 | 0,015 | 0,051 | 1 |
| Snx25      | 0,001051 | -0,03481 | 0,022 | 0,063 | 1 |
| Proser1    | 0,001053 | -0,04861 | 0,193 | 0,289 | 1 |
| Polr3gl    | 0,001053 | -0,0717  | 0,152 | 0,234 | 1 |
| Rnf103     | 0,001055 | -0,08452 | 0,308 | 0,418 | 1 |
| Tada1      | 0,001056 | -0,08641 | 0,486 | 0,61  | 1 |
| Ccdc86     | 0,001057 | -0,06658 | 0,211 | 0,306 | 1 |
| Tex9       | 0,001058 | -0,06534 | 0,081 | 0,146 | 1 |
| Celf2      | 0,001058 | -0,05384 | 0,028 | 0,072 | 1 |
| Samd4b     | 0,001065 | 0,128134 | 0,664 | 0,616 | 1 |
| 5430403G   | 0,001069 | -0,05083 | 0,046 | 0,099 | 1 |
| Wdr33      | 0,00107  | -0,05088 | 0,253 | 0,363 | 1 |
| Cd99l2     | 0,001074 | -0,05664 | 0,286 | 0,397 | 1 |
| Calu       | 0,001075 | 0,151052 | 0,514 | 0,458 | 1 |



|            |          |          |       |       |   |
|------------|----------|----------|-------|-------|---|
| Slc25a46   | 0,001077 | -0,07413 | 0,33  | 0,443 | 1 |
| Tmem9      | 0,001083 | -0,05686 | 0,079 | 0,143 | 1 |
| Mylk       | 0,001083 | 0,071331 | 0,037 | 0,006 | 1 |
| Iba57      | 0,00109  | -0,03322 | 0,015 | 0,051 | 1 |
| 9530068E   | 0,001097 | -0,07383 | 0,585 | 0,717 | 1 |
| Usp34      | 0,001098 | 0,152002 | 0,758 | 0,724 | 1 |
| Lctl       | 0,001101 | -0,03121 | 0,015 | 0,051 | 1 |
| Cdc23      | 0,001115 | -0,07039 | 0,248 | 0,35  | 1 |
| Irgq       | 0,001116 | 0,090095 | 0,154 | 0,089 | 1 |
| Npr2       | 0,001116 | 0,038541 | 0,037 | 0,006 | 1 |
| Gm17056    | 0,001116 | 0,040294 | 0,037 | 0,006 | 1 |
| Fbxo9      | 0,00112  | -0,05823 | 0,411 | 0,549 | 1 |
| Isg20l2    | 0,00112  | -0,06385 | 0,112 | 0,186 | 1 |
| Gm49207    | 0,00112  | -0,04869 | 0,064 | 0,124 | 1 |
| Csgalnact2 | 0,001122 | -0,05173 | 0,15  | 0,236 | 1 |
| Ube2w      | 0,001123 | -0,07359 | 0,31  | 0,42  | 1 |
| Nae1       | 0,001123 | -0,04777 | 0,36  | 0,489 | 1 |
| Pygo2      | 0,001123 | -0,05001 | 0,187 | 0,283 | 1 |
| Sac3d1     | 0,001127 | -0,05821 | 0,119 | 0,196 | 1 |
| Arrb1      | 0,00113  | 0,079508 | 0,084 | 0,036 | 1 |
| Ppp6c      | 0,001131 | -0,05417 | 0,483 | 0,622 | 1 |
| Rnf144a    | 0,001132 | -0,07031 | 0,275 | 0,384 | 1 |
| 231006110  | 0,001134 | -0,0639  | 0,193 | 0,285 | 1 |
| Nr4a2      | 0,001137 | 0,063577 | 0,028 | 0,002 | 1 |
| Ppp1r37    | 0,001138 | -0,08995 | 0,483 | 0,605 | 1 |
| Ccdc25     | 0,001139 | -0,06923 | 0,24  | 0,342 | 1 |
| Myo9a      | 0,001141 | 0,186831 | 0,62  | 0,591 | 1 |
| Hoxa4      | 0,001149 | -0,0669  | 0,217 | 0,31  | 1 |
| Cmc2       | 0,001156 | -0,05823 | 0,141 | 0,224 | 1 |
| Hecw2      | 0,001159 | -0,07807 | 0,472 | 0,608 | 1 |
| Wdr55      | 0,00116  | -0,05109 | 0,105 | 0,177 | 1 |
| Nipsnap2   | 0,00116  | -0,07953 | 0,472 | 0,614 | 1 |
| Nop53      | 0,001163 | 0,144407 | 0,747 | 0,713 | 1 |
| Gm21847    | 0,001164 | 0,030716 | 0,022 | 0     | 1 |
| Clec2d     | 0,001164 | 0,048353 | 0,022 | 0     | 1 |
| Dmwd       | 0,001164 | -0,08984 | 0,539 | 0,654 | 1 |
| Dynlt1a    | 0,001165 | -0,05613 | 0,094 | 0,162 | 1 |
| Cdk2       | 0,001165 | 0,068823 | 0,084 | 0,036 | 1 |
| Kmt5b      | 0,001169 | 0,178239 | 0,578 | 0,538 | 1 |
| Eaf1       | 0,001171 | -0,04671 | 0,145 | 0,23  | 1 |
| Rnmt       | 0,001174 | -0,04687 | 0,264 | 0,378 | 1 |
| Sypl       | 0,001175 | -0,15802 | 0,994 | 0,994 | 1 |
| Rbm7       | 0,001175 | -0,05694 | 0,44  | 0,584 | 1 |
| 3110002H   | 0,001176 | -0,05941 | 0,154 | 0,238 | 1 |
| Palm2      | 0,001179 | -0,05753 | 0,237 | 0,346 | 1 |
| Tns1       | 0,001179 | 0,145849 | 0,376 | 0,295 | 1 |
| Gpank1     | 0,00118  | -0,05524 | 0,18  | 0,272 | 1 |
| Rabgap1    | 0,001188 | -0,05662 | 0,497 | 0,652 | 1 |
| Cdk7       | 0,001192 | -0,06834 | 0,183 | 0,27  | 1 |
| Hax1       | 0,001192 | -0,05705 | 0,374 | 0,502 | 1 |
| Sugp1      | 0,001193 | -0,07809 | 0,246 | 0,346 | 1 |
| Mrpl19     | 0,001194 | -0,07118 | 0,237 | 0,338 | 1 |

|           |          |          |       |       |   |
|-----------|----------|----------|-------|-------|---|
| Gm8186    | 0,001196 | -0,05415 | 0,051 | 0,105 | 1 |
| Top1      | 0,001204 | 0,16661  | 0,868 | 0,842 | 1 |
| Gm6297    | 0,001207 | -0,03639 | 0,024 | 0,065 | 1 |
| D130017N  | 0,00121  | -0,06338 | 0,121 | 0,196 | 1 |
| Dctn5     | 0,001211 | -0,06158 | 0,325 | 0,449 | 1 |
| 4930539JC | 0,001215 | -0,04267 | 0,029 | 0,074 | 1 |
| Irak1     | 0,001222 | -0,0602  | 0,251 | 0,354 | 1 |
| Gm43713   | 0,001224 | -0,05783 | 0,139 | 0,219 | 1 |
| Pex19     | 0,001224 | -0,07043 | 0,437 | 0,574 | 1 |
| lqcc      | 0,001229 | -0,05356 | 0,141 | 0,224 | 1 |
| Pqbp1     | 0,001233 | -0,08737 | 0,435 | 0,561 | 1 |
| B930036N  | 0,001242 | 0,055301 | 0,075 | 0,03  | 1 |
| Scg2      | 0,001243 | -0,01881 | 0     | 0,019 | 1 |
| Hoxb8     | 0,001243 | -0,01881 | 0     | 0,019 | 1 |
| Hbb-bt    | 0,001243 | -1,6069  | 0     | 0,019 | 1 |
| Fgd3      | 0,001244 | -0,05178 | 0,187 | 0,281 | 1 |
| Psmf1     | 0,001245 | -0,07069 | 0,207 | 0,3   | 1 |
| Tmed7     | 0,001246 | 0,122609 | 0,956 | 0,939 | 1 |
| Gm28875   | 0,001252 | -0,06729 | 0,169 | 0,257 | 1 |
| Tfdp1     | 0,00126  | -0,07059 | 0,158 | 0,241 | 1 |
| Thumpd3   | 0,001261 | -0,06291 | 0,207 | 0,302 | 1 |
| Tmem167b  | 0,001262 | -0,0623  | 0,283 | 0,39  | 1 |
| Zbtb43    | 0,001262 | -0,05542 | 0,165 | 0,251 | 1 |
| Zfp277    | 0,001263 | -0,05826 | 0,224 | 0,325 | 1 |
| Lin7c     | 0,001264 | -0,06944 | 0,372 | 0,489 | 1 |
| Vcl       | 0,001267 | -0,05768 | 0,061 | 0,118 | 1 |
| Cd46      | 0,001268 | -0,03678 | 0,024 | 0,065 | 1 |
| Tmem160   | 0,001269 | -0,07214 | 0,341 | 0,451 | 1 |
| Mcrs1     | 0,001269 | -0,06954 | 0,407 | 0,538 | 1 |
| Ptpn13    | 0,00127  | -0,04064 | 0,013 | 0,046 | 1 |
| Rpp14     | 0,001273 | -0,07294 | 0,231 | 0,325 | 1 |
| Zfp959    | 0,001275 | -0,04943 | 0,05  | 0,103 | 1 |
| Twf1      | 0,001277 | -0,08681 | 0,758 | 0,848 | 1 |
| Leng1     | 0,001279 | -0,06777 | 0,253 | 0,354 | 1 |
| Nod1      | 0,00128  | 0,127348 | 0,259 | 0,184 | 1 |
| Apba3     | 0,001282 | -0,06138 | 0,18  | 0,268 | 1 |
| Tmc6      | 0,001283 | -0,06945 | 0,268 | 0,373 | 1 |
| Gm26909   | 0,001284 | -0,08497 | 0,116 | 0,188 | 1 |
| Ints6     | 0,001284 | 0,228784 | 0,435 | 0,38  | 1 |
| Mterf4    | 0,001285 | -0,06535 | 0,108 | 0,179 | 1 |
| Clpx      | 0,001286 | -0,05468 | 0,301 | 0,414 | 1 |
| Cog1      | 0,001291 | -0,06005 | 0,163 | 0,249 | 1 |
| Bdkrb2    | 0,001293 | -0,0562  | 0,079 | 0,143 | 1 |
| Gm46447   | 0,001305 | -0,03848 | 0,035 | 0,082 | 1 |
| Glmp      | 0,001305 | -0,08713 | 0,583 | 0,7   | 1 |
| Dimt1     | 0,001307 | -0,06092 | 0,16  | 0,247 | 1 |
| Zranb2    | 0,001312 | -0,09046 | 0,745 | 0,823 | 1 |
| Hes6      | 0,001317 | -0,05391 | 0,097 | 0,167 | 1 |
| Gm12089   | 0,001318 | 0,04135  | 0,044 | 0,011 | 1 |
| Nucks1    | 0,00132  | 0,101282 | 0,985 | 0,962 | 1 |
| Ttf1      | 0,001323 | -0,05092 | 0,209 | 0,31  | 1 |
| Fam118b   | 0,001325 | -0,05762 | 0,103 | 0,173 | 1 |

|           |          |          |       |       |   |
|-----------|----------|----------|-------|-------|---|
| Xrcc5     | 0,001327 | -0,05077 | 0,152 | 0,236 | 1 |
| Arel1     | 0,001328 | -0,07904 | 0,255 | 0,357 | 1 |
| Coil      | 0,001331 | -0,05227 | 0,094 | 0,162 | 1 |
| Nsun2     | 0,001333 | -0,08013 | 0,369 | 0,483 | 1 |
| Epb4112   | 0,001336 | 0,135562 | 0,85  | 0,812 | 1 |
| Pxmp4     | 0,001341 | -0,02907 | 0,294 | 0,405 | 1 |
| Tmcc2     | 0,001345 | 0,124931 | 0,905 | 0,886 | 1 |
| Kcnq3     | 0,001345 | -0,08207 | 0,629 | 0,749 | 1 |
| Scfd2     | 0,001345 | -0,07139 | 0,121 | 0,194 | 1 |
| Zfp444    | 0,001349 | -0,06535 | 0,11  | 0,181 | 1 |
| Clpp      | 0,001352 | -0,10016 | 0,532 | 0,637 | 1 |
| Ccnjl     | 0,001354 | -0,02719 | 0,013 | 0,046 | 1 |
| Trappc12  | 0,001354 | -0,04837 | 0,314 | 0,439 | 1 |
| 1700113A: | 0,001358 | -0,04986 | 0,094 | 0,162 | 1 |
| Alg14     | 0,001358 | -0,06236 | 0,283 | 0,392 | 1 |
| Setd3     | 0,001362 | -0,08615 | 0,727 | 0,812 | 1 |
| Med20     | 0,001363 | -0,05626 | 0,224 | 0,321 | 1 |
| Psma1     | 0,001366 | -0,07652 | 0,585 | 0,698 | 1 |
| Kpna1     | 0,001366 | -0,04355 | 0,33  | 0,454 | 1 |
| Pank1     | 0,001369 | -0,0448  | 0,031 | 0,076 | 1 |
| Gm4876    | 0,001382 | -0,03199 | 0,007 | 0,036 | 1 |
| Csrnp1    | 0,001385 | 0,255511 | 0,198 | 0,133 | 1 |
| Fam120a   | 0,001387 | 0,162413 | 0,622 | 0,601 | 1 |
| Nr3c1     | 0,001393 | 0,114184 | 0,949 | 0,918 | 1 |
| E130307A1 | 0,001395 | -0,05334 | 0,2   | 0,295 | 1 |
| Zbtb22    | 0,001402 | -0,05928 | 0,169 | 0,253 | 1 |
| Rpl18a    | 0,001402 | 0,119142 | 1     | 0,994 | 1 |
| Gm7967    | 0,001405 | -0,12724 | 0,022 | 0,061 | 1 |
| Cdh6      | 0,001406 | -0,0508  | 0,123 | 0,203 | 1 |
| Gm996     | 0,001408 | -0,04411 | 0,099 | 0,169 | 1 |
| Med1      | 0,001411 | -0,03552 | 0,413 | 0,568 | 1 |
| Brd8      | 0,001411 | 0,14464  | 0,635 | 0,601 | 1 |
| Sema7a    | 0,001413 | 0,173872 | 0,613 | 0,572 | 1 |
| Acat1     | 0,001413 | -0,0914  | 0,556 | 0,667 | 1 |
| Fahd2a    | 0,001417 | -0,06596 | 0,132 | 0,209 | 1 |
| Harbi1    | 0,001417 | -0,05783 | 0,066 | 0,124 | 1 |
| Jakmip2   | 0,001417 | -0,07679 | 0,231 | 0,329 | 1 |
| Cstf3     | 0,001422 | -0,04847 | 0,198 | 0,293 | 1 |
| Agap3     | 0,001429 | -0,07529 | 0,334 | 0,445 | 1 |
| Oxr1      | 0,001429 | -0,09399 | 0,683 | 0,787 | 1 |
| Sec14l5   | 0,001435 | 0,157719 | 0,76  | 0,755 | 1 |
| Gm12184   | 0,001443 | -0,0412  | 0,062 | 0,12  | 1 |
| Pmm2      | 0,001445 | -0,04414 | 0,297 | 0,42  | 1 |
| Ttc5      | 0,001448 | -0,04026 | 0,336 | 0,468 | 1 |
| Fam118a   | 0,001448 | -0,05468 | 0,09  | 0,156 | 1 |
| Psma7     | 0,001448 | -0,08166 | 0,963 | 0,956 | 1 |
| Gpn3      | 0,001451 | -0,04645 | 0,251 | 0,359 | 1 |
| Zfp58     | 0,001452 | -0,05241 | 0,046 | 0,097 | 1 |
| Poc5      | 0,001454 | -0,0644  | 0,222 | 0,319 | 1 |
| Hyal1     | 0,001455 | -0,05497 | 0,092 | 0,158 | 1 |
| Spock1    | 0,001457 | 0,155983 | 0,772 | 0,703 | 1 |
| Trp53i13  | 0,001464 | -0,06538 | 0,349 | 0,464 | 1 |

|          |          |          |       |       |   |
|----------|----------|----------|-------|-------|---|
| Slc25a3  | 0,001465 | -0,09372 | 0,928 | 0,935 | 1 |
| Adra1b   | 0,001472 | -0,057   | 0,066 | 0,124 | 1 |
| 9330111N | 0,00148  | -0,06377 | 0,048 | 0,099 | 1 |
| Ddx54    | 0,001483 | -0,0408  | 0,316 | 0,439 | 1 |
| Adck1    | 0,001483 | -0,0644  | 0,16  | 0,241 | 1 |
| Gab2     | 0,001485 | -0,04602 | 0,106 | 0,179 | 1 |
| Chtf8    | 0,001488 | -0,05942 | 0,218 | 0,312 | 1 |
| Ddx52    | 0,001495 | -0,06176 | 0,255 | 0,359 | 1 |
| Shkbp1   | 0,001499 | -0,06422 | 0,194 | 0,285 | 1 |
| Hlcs     | 0,001507 | -0,0663  | 0,152 | 0,234 | 1 |
| Tbc1d12  | 0,001519 | -0,05714 | 0,372 | 0,502 | 1 |
| Igdcc4   | 0,00152  | 0,045181 | 0,031 | 0,004 | 1 |
| Cyp3a13  | 0,00152  | -0,0673  | 0,068 | 0,127 | 1 |
| Smarce1  | 0,001523 | -0,07097 | 0,459 | 0,572 | 1 |
| D430042O | 0,001525 | -0,06407 | 0,2   | 0,289 | 1 |
| Fam19a2  | 0,001527 | 0,042044 | 0,031 | 0,004 | 1 |
| Mkks     | 0,00153  | -0,05848 | 0,121 | 0,194 | 1 |
| Emc3     | 0,001533 | -0,07619 | 0,681 | 0,789 | 1 |
| Arl10    | 0,001539 | -0,05012 | 0,077 | 0,139 | 1 |
| Alg11    | 0,001545 | -0,05906 | 0,206 | 0,297 | 1 |
| Ppp4r3b  | 0,001564 | -0,05811 | 0,462 | 0,584 | 1 |
| Mettl26  | 0,001565 | -0,04971 | 0,354 | 0,489 | 1 |
| Timm21   | 0,001567 | -0,04887 | 0,224 | 0,323 | 1 |
| Dusp22   | 0,001567 | -0,05738 | 0,161 | 0,245 | 1 |
| Zfr2     | 0,001568 | -0,05995 | 0,081 | 0,143 | 1 |
| Ctnna1   | 0,001569 | 0,128236 | 0,837 | 0,81  | 1 |
| Hspb6    | 0,00158  | -0,05177 | 0,04  | 0,089 | 1 |
| Cnot11   | 0,00158  | -0,06343 | 0,152 | 0,232 | 1 |
| Mapkapk5 | 0,001583 | -0,05663 | 0,095 | 0,162 | 1 |
| Ubald1   | 0,001589 | -0,06933 | 0,439 | 0,553 | 1 |
| Bag4     | 0,001589 | -0,05221 | 0,261 | 0,369 | 1 |
| Commd2   | 0,001592 | -0,06323 | 0,246 | 0,344 | 1 |
| Cyc1     | 0,001594 | -0,09766 | 0,692 | 0,759 | 1 |
| Lgalsl   | 0,001596 | -0,04548 | 0,055 | 0,11  | 1 |
| Chil1    | 0,001597 | -0,04034 | 0,028 | 0,07  | 1 |
| Chtop    | 0,001598 | 0,120012 | 0,754 | 0,715 | 1 |
| Fbxo18   | 0,001601 | -0,08577 | 0,165 | 0,243 | 1 |
| Sco2     | 0,001602 | -0,06064 | 0,101 | 0,169 | 1 |
| Ncald    | 0,001603 | -0,06268 | 0,826 | 0,861 | 1 |
| AW209491 | 0,001606 | -0,04009 | 0,11  | 0,184 | 1 |
| 1500009C | 0,001614 | -0,02522 | 0,002 | 0,023 | 1 |
| Slbp     | 0,001615 | 0,175413 | 0,294 | 0,222 | 1 |
| Impdh2   | 0,001615 | -0,04085 | 0,349 | 0,481 | 1 |
| Nrxn3    | 0,001617 | -0,02317 | 0,002 | 0,023 | 1 |
| Gm42413  | 0,00162  | -0,02111 | 0,002 | 0,023 | 1 |
| Lama2    | 0,00162  | -0,02111 | 0,002 | 0,023 | 1 |
| Cyba     | 0,00162  | -0,02111 | 0,002 | 0,023 | 1 |
| Nsg2     | 0,00162  | -0,02111 | 0,002 | 0,023 | 1 |
| Bbs2     | 0,001627 | -0,05873 | 0,108 | 0,179 | 1 |
| Prr14l   | 0,001631 | -0,04592 | 0,233 | 0,335 | 1 |
| Zfp397   | 0,001632 | -0,04713 | 0,382 | 0,5   | 1 |
| Slc9a3r2 | 0,001632 | 0,253019 | 0,352 | 0,285 | 1 |

|           |          |          |       |       |   |
|-----------|----------|----------|-------|-------|---|
| Tango2    | 0,001636 | -0,05785 | 0,283 | 0,397 | 1 |
| Ncf2      | 0,001638 | -0,1804  | 0,011 | 0,042 | 1 |
| Gpr61     | 0,001638 | -0,04777 | 0,04  | 0,089 | 1 |
| 330000210 | 0,00165  | -0,03038 | 0,011 | 0,042 | 1 |
| Wdr47     | 0,00165  | -0,06257 | 0,288 | 0,392 | 1 |
| C1ql1     | 0,001652 | -0,02134 | 0,002 | 0,023 | 1 |
| Ubn1      | 0,001656 | 0,15666  | 0,628 | 0,608 | 1 |
| Cd2bp2    | 0,001659 | -0,05586 | 0,299 | 0,414 | 1 |
| Mob3b     | 0,001662 | 0,128473 | 0,629 | 0,555 | 1 |
| Prkdc     | 0,001664 | -0,07153 | 0,191 | 0,278 | 1 |
| Siah1a    | 0,001673 | -0,06613 | 0,336 | 0,454 | 1 |
| Hacd3     | 0,001675 | -0,05533 | 0,264 | 0,369 | 1 |
| Mplkip    | 0,001679 | -0,046   | 0,242 | 0,348 | 1 |
| Iglon5    | 0,001681 | 0,059375 | 0,035 | 0,006 | 1 |
| Btbd2     | 0,001687 | -0,05928 | 0,172 | 0,255 | 1 |
| Adsl      | 0,001688 | -0,06077 | 0,189 | 0,274 | 1 |
| Abhd8     | 0,001691 | -0,02545 | 0,004 | 0,027 | 1 |
| Rpl35     | 0,001692 | -0,04674 | 0,965 | 0,958 | 1 |
| Hexim1    | 0,001693 | 0,192028 | 0,31  | 0,241 | 1 |
| Coasy     | 0,001695 | -0,07408 | 0,358 | 0,466 | 1 |
| Cbx6      | 0,001696 | 0,149899 | 0,657 | 0,608 | 1 |
| Rgs7      | 0,001697 | -0,02339 | 0,004 | 0,027 | 1 |
| Gm35850   | 0,001697 | -0,02339 | 0,004 | 0,027 | 1 |
| Msrb1     | 0,001697 | -0,14966 | 0,738 | 0,791 | 1 |
| Ncoa7     | 0,001699 | -0,07223 | 0,277 | 0,38  | 1 |
| Mindy3    | 0,001709 | -0,06631 | 0,424 | 0,555 | 1 |
| Gm26759   | 0,001709 | -0,02794 | 0,028 | 0,07  | 1 |
| Snx3      | 0,00171  | -0,07757 | 0,93  | 0,951 | 1 |
| Gm16894   | 0,001715 | -0,03561 | 0,018 | 0,055 | 1 |
| Tsr2      | 0,001726 | -0,06052 | 0,288 | 0,397 | 1 |
| Akap17b   | 0,001729 | -0,05492 | 0,051 | 0,103 | 1 |
| Cend1     | 0,00173  | -0,05474 | 0,356 | 0,475 | 1 |
| Gm10371   | 0,00173  | -0,03502 | 0,015 | 0,049 | 1 |
| Nelfa     | 0,001733 | -0,06559 | 0,15  | 0,23  | 1 |
| Pus7      | 0,001734 | -0,07596 | 0,31  | 0,42  | 1 |
| Mrm3      | 0,001738 | -0,05709 | 0,062 | 0,118 | 1 |
| Samd1     | 0,00174  | -0,03872 | 0,387 | 0,523 | 1 |
| Trappc10  | 0,001747 | -0,08947 | 0,807 | 0,884 | 1 |
| Nelfe     | 0,001749 | -0,04165 | 0,323 | 0,449 | 1 |
| Iqgap1    | 0,001751 | 0,149224 | 0,367 | 0,289 | 1 |
| Mtmr11    | 0,001755 | 0,035026 | 0,035 | 0,006 | 1 |
| Trim24    | 0,001758 | -0,05712 | 0,308 | 0,416 | 1 |
| Zfp932    | 0,00176  | -0,07514 | 0,183 | 0,268 | 1 |
| Sema3e    | 0,001764 | -0,03542 | 0,015 | 0,049 | 1 |
| Gm15417   | 0,001764 | -0,07819 | 0,233 | 0,323 | 1 |
| Ccdc174   | 0,001767 | -0,03884 | 0,356 | 0,479 | 1 |
| Esyt2     | 0,001776 | 0,158209 | 0,36  | 0,304 | 1 |
| Nkain2    | 0,001779 | 0,120604 | 0,868 | 0,846 | 1 |
| Lpgat1    | 0,001779 | 0,128718 | 0,93  | 0,869 | 1 |
| Gm1673    | 0,001786 | -0,03837 | 0,018 | 0,055 | 1 |
| Tada2b    | 0,001787 | -0,05673 | 0,16  | 0,243 | 1 |
| Gart      | 0,00179  | -0,05471 | 0,36  | 0,485 | 1 |

|          |          |          |       |       |   |
|----------|----------|----------|-------|-------|---|
| Rexo5    | 0,001799 | -0,02941 | 0,015 | 0,049 | 1 |
| Cfap20   | 0,001802 | -0,04584 | 0,339 | 0,464 | 1 |
| Slc33a1  | 0,001803 | -0,06966 | 0,295 | 0,401 | 1 |
| Nob1     | 0,001804 | -0,0535  | 0,172 | 0,259 | 1 |
| Gm13594  | 0,001805 | -0,04249 | 0,029 | 0,072 | 1 |
| Zfand3   | 0,001806 | -0,06353 | 0,374 | 0,494 | 1 |
| Parp9    | 0,001807 | 0,044496 | 0,026 | 0,002 | 1 |
| Erc8     | 0,001808 | -0,05821 | 0,119 | 0,192 | 1 |
| Map2k4   | 0,001814 | -0,07984 | 0,239 | 0,329 | 1 |
| Dnajc2   | 0,001818 | -0,05723 | 0,277 | 0,382 | 1 |
| Tulp3    | 0,001823 | -0,32935 | 0,303 | 0,403 | 1 |
| Kptn     | 0,001824 | -0,06968 | 0,222 | 0,314 | 1 |
| Cdk2ap2  | 0,001824 | -0,0695  | 0,372 | 0,492 | 1 |
| Rpf1     | 0,001826 | -0,05816 | 0,171 | 0,253 | 1 |
| Arl3     | 0,001829 | -0,07479 | 0,538 | 0,662 | 1 |
| Coq3     | 0,00183  | -0,06663 | 0,086 | 0,148 | 1 |
| Fgfr1op  | 0,00183  | -0,04103 | 0,097 | 0,167 | 1 |
| Ppp1r7   | 0,001833 | -0,06767 | 0,428 | 0,538 | 1 |
| Wscd2    | 0,001834 | -0,03442 | 0,024 | 0,063 | 1 |
| Pik3ip1  | 0,001839 | -0,08139 | 0,626 | 0,736 | 1 |
| Nisch    | 0,001843 | 0,097766 | 0,939 | 0,914 | 1 |
| Chfr     | 0,001844 | -0,04081 | 0,336 | 0,458 | 1 |
| Rbm17    | 0,001844 | -0,06333 | 0,396 | 0,517 | 1 |
| Actg1    | 0,001857 | 0,138963 | 0,998 | 0,996 | 1 |
| Skp1a    | 0,001864 | -0,08158 | 0,817 | 0,873 | 1 |
| Gatad1   | 0,001865 | -0,06894 | 0,646 | 0,747 | 1 |
| Acot9    | 0,00187  | -0,06007 | 0,128 | 0,203 | 1 |
| Mfsd13a  | 0,001871 | -0,06926 | 0,158 | 0,236 | 1 |
| Txn1     | 0,001881 | -0,08307 | 0,774 | 0,869 | 1 |
| Col13a1  | 0,001883 | 0,076042 | 0,092 | 0,042 | 1 |
| Mre11a   | 0,001883 | -0,06287 | 0,114 | 0,186 | 1 |
| Rgs14    | 0,001885 | 0,030716 | 0,02  | 0     | 1 |
| Fbxo31   | 0,001886 | -0,06942 | 0,316 | 0,422 | 1 |
| Slc30a9  | 0,001887 | -0,09788 | 0,527 | 0,637 | 1 |
| Fam222b  | 0,001888 | -0,07691 | 0,145 | 0,219 | 1 |
| Fiz1     | 0,001888 | -0,06719 | 0,281 | 0,382 | 1 |
| Oaz2     | 0,001891 | -0,06434 | 0,339 | 0,451 | 1 |
| Sod1     | 0,001892 | 0,145693 | 0,734 | 0,703 | 1 |
| Tmem132c | 0,001894 | 0,048653 | 0,039 | 0,008 | 1 |
| Alg3     | 0,001895 | -0,05605 | 0,083 | 0,143 | 1 |
| Arl6ip4  | 0,001898 | -0,05839 | 0,382 | 0,506 | 1 |
| Mfsd14a  | 0,001902 | -0,07867 | 0,772 | 0,833 | 1 |
| Tnxb     | 0,001913 | 0,058622 | 0,042 | 0,011 | 1 |
| Mpg      | 0,00192  | -0,06872 | 0,103 | 0,169 | 1 |
| Slc39a13 | 0,001927 | -0,06154 | 0,222 | 0,314 | 1 |
| Zswim7   | 0,001928 | -0,05229 | 0,156 | 0,238 | 1 |
| Sgip1    | 0,001931 | -0,07595 | 0,235 | 0,329 | 1 |
| 2510002D | 0,001932 | -0,0494  | 0,081 | 0,143 | 1 |
| Add3     | 0,001941 | -0,13065 | 0,818 | 0,854 | 1 |
| Nle1     | 0,001943 | -0,04078 | 0,042 | 0,091 | 1 |
| Pstpip2  | 0,001947 | -0,06524 | 0,158 | 0,236 | 1 |
| Klf10    | 0,001948 | 0,143833 | 0,149 | 0,089 | 1 |

|          |          |          |       |       |   |
|----------|----------|----------|-------|-------|---|
| Tbl1x    | 0,001949 | -0,05247 | 0,385 | 0,511 | 1 |
| B230344G | 0,001957 | -0,05139 | 0,108 | 0,177 | 1 |
| Nek3     | 0,001957 | -0,05115 | 0,053 | 0,105 | 1 |
| Hbs1l    | 0,001963 | -0,06326 | 0,323 | 0,437 | 1 |
| Chst2    | 0,001963 | -0,1173  | 0,345 | 0,449 | 1 |
| Upf3b    | 0,001967 | -0,06506 | 0,556 | 0,667 | 1 |
| Mapkap1  | 0,001972 | -0,05537 | 0,343 | 0,466 | 1 |
| Gm12166  | 0,001976 | -0,04986 | 0,046 | 0,095 | 1 |
| Zfp809   | 0,001977 | -0,05141 | 0,116 | 0,188 | 1 |
| Tmem151a | 0,001978 | -0,07289 | 0,998 | 0,998 | 1 |
| Yme1l1   | 0,001981 | 0,156547 | 0,62  | 0,57  | 1 |
| Gstm4    | 0,001985 | -0,05768 | 0,066 | 0,122 | 1 |
| Nat10    | 0,001994 | -0,04215 | 0,094 | 0,16  | 1 |
| Csnk2a2  | 0,001994 | -0,06774 | 0,38  | 0,511 | 1 |
| Nrg2     | 0,001999 | -0,04943 | 0,051 | 0,103 | 1 |
| Lig4     | 0,002001 | -0,05136 | 0,086 | 0,15  | 1 |
| Chic2    | 0,002003 | -0,04305 | 0,042 | 0,091 | 1 |
| Ttc33    | 0,002014 | -0,04085 | 0,356 | 0,481 | 1 |
| Atp6v0a2 | 0,00202  | -0,06292 | 0,437 | 0,57  | 1 |
| Zwint    | 0,002031 | -0,05374 | 0,349 | 0,487 | 1 |
| Rpl38    | 0,00204  | -0,03331 | 0,996 | 0,998 | 1 |
| 2310033P | 0,002042 | -0,06826 | 0,266 | 0,369 | 1 |
| Zfp260   | 0,00205  | -0,03575 | 0,343 | 0,479 | 1 |
| Zkscan7  | 0,002056 | -0,0478  | 0,073 | 0,133 | 1 |
| Nme6     | 0,002064 | -0,05333 | 0,081 | 0,141 | 1 |
| Xpa      | 0,002067 | -0,04902 | 0,31  | 0,426 | 1 |
| Pnn      | 0,002072 | -0,08324 | 0,811 | 0,873 | 1 |
| Ptp4a1   | 0,002076 | -0,08068 | 0,998 | 0,992 | 1 |
| Ptges2   | 0,00208  | -0,04807 | 0,226 | 0,321 | 1 |
| Crls1    | 0,002081 | -0,07116 | 0,273 | 0,371 | 1 |
| Tmem108  | 0,002081 | -0,06675 | 0,294 | 0,397 | 1 |
| Acat2    | 0,002082 | -0,07216 | 0,341 | 0,454 | 1 |
| Serpine2 | 0,002085 | -0,02632 | 0,009 | 0,038 | 1 |
| Zfyve9   | 0,002085 | -0,04773 | 0,35  | 0,468 | 1 |
| 9330198N | 0,002093 | -0,08307 | 0,239 | 0,329 | 1 |
| Golga5   | 0,002098 | -0,05477 | 0,217 | 0,31  | 1 |
| Rpl13    | 0,0021   | 0,112809 | 1     | 0,996 | 1 |
| Fip1l1   | 0,002107 | -0,08452 | 0,606 | 0,707 | 1 |
| Ptbp3    | 0,002114 | 0,177091 | 0,472 | 0,43  | 1 |
| Tns3     | 0,002116 | 0,146986 | 0,615 | 0,57  | 1 |
| Slc31a2  | 0,002119 | -0,07032 | 0,332 | 0,445 | 1 |
| Aen      | 0,002121 | -0,05056 | 0,128 | 0,203 | 1 |
| Actr8    | 0,002128 | -0,05127 | 0,292 | 0,399 | 1 |
| Relt     | 0,002136 | -0,03818 | 0,026 | 0,065 | 1 |
| Psmc1    | 0,002144 | -0,06691 | 0,749 | 0,821 | 1 |
| Serac1   | 0,002147 | -0,03617 | 0,037 | 0,082 | 1 |
| Tfg      | 0,00215  | -0,08922 | 0,552 | 0,643 | 1 |
| Reep4    | 0,002154 | -0,04325 | 0,062 | 0,118 | 1 |
| Tmem259  | 0,002155 | -0,06702 | 0,541 | 0,66  | 1 |
| Rbbp5    | 0,002157 | -0,04413 | 0,213 | 0,306 | 1 |
| Coq6     | 0,00216  | -0,05566 | 0,143 | 0,222 | 1 |
| 2810414N | 0,002162 | -0,03301 | 0,017 | 0,051 | 1 |

|           |          |          |       |       |   |
|-----------|----------|----------|-------|-------|---|
| Slc30a6   | 0,002163 | -0,06884 | 0,114 | 0,181 | 1 |
| Bloc1s6   | 0,002167 | -0,04971 | 0,088 | 0,152 | 1 |
| Fam53c    | 0,002173 | -0,0444  | 0,273 | 0,382 | 1 |
| Mpv17l    | 0,002181 | -0,07029 | 0,228 | 0,319 | 1 |
| Ergic1    | 0,002181 | -0,05762 | 0,101 | 0,167 | 1 |
| Ube2d3    | 0,002186 | 0,145845 | 0,961 | 0,966 | 1 |
| Ext1      | 0,00219  | -0,04364 | 0,117 | 0,192 | 1 |
| Gba       | 0,002198 | -0,05525 | 0,292 | 0,401 | 1 |
| Gm14399   | 0,002201 | -0,03322 | 0,017 | 0,051 | 1 |
| Zrsr2     | 0,002202 | -0,05775 | 0,334 | 0,443 | 1 |
| Cdc42ep4  | 0,002206 | -0,05319 | 0,057 | 0,11  | 1 |
| Ing2      | 0,00221  | -0,04287 | 0,209 | 0,302 | 1 |
| Rabif     | 0,002213 | -0,06524 | 0,187 | 0,27  | 1 |
| Megf8     | 0,002223 | 0,107712 | 0,255 | 0,179 | 1 |
| Ap1s2     | 0,002225 | -0,04792 | 0,116 | 0,186 | 1 |
| Gpr176    | 0,002236 | -0,0308  | 0,013 | 0,044 | 1 |
| Cspg5     | 0,002241 | -0,05512 | 0,084 | 0,148 | 1 |
| N4bp2l1   | 0,002242 | -0,04507 | 0,095 | 0,162 | 1 |
| Vps39     | 0,002249 | -0,05906 | 0,213 | 0,306 | 1 |
| Gpalpp1   | 0,002252 | -0,05755 | 0,183 | 0,268 | 1 |
| Hnrnpa3   | 0,002252 | 0,122646 | 0,978 | 0,964 | 1 |
| Spred1    | 0,002255 | -0,08708 | 0,71  | 0,793 | 1 |
| Gm17655   | 0,00226  | -0,03697 | 0,026 | 0,065 | 1 |
| Lgi4      | 0,002261 | 0,179469 | 0,272 | 0,203 | 1 |
| Prpf4     | 0,002262 | -0,04938 | 0,244 | 0,344 | 1 |
| Golph3l   | 0,002272 | -0,05339 | 0,172 | 0,255 | 1 |
| Alas1     | 0,002275 | -0,05445 | 0,185 | 0,274 | 1 |
| 1810010H  | 0,002276 | -0,031   | 0,013 | 0,044 | 1 |
| Sox10     | 0,002285 | 0,107253 | 1     | 0,994 | 1 |
| Pef1      | 0,002293 | -0,07248 | 0,297 | 0,395 | 1 |
| Cpm       | 0,002293 | -0,07689 | 0,672 | 0,774 | 1 |
| H13       | 0,002297 | -0,06139 | 0,382 | 0,492 | 1 |
| Mtcp1     | 0,002298 | -0,0456  | 0,081 | 0,141 | 1 |
| Myo6      | 0,002305 | -0,0854  | 0,983 | 0,987 | 1 |
| Zfp518a   | 0,002307 | -0,04454 | 0,239 | 0,333 | 1 |
| 2700016F2 | 0,002309 | -0,05376 | 0,095 | 0,16  | 1 |
| Ccdc62    | 0,002311 | -0,04359 | 0,064 | 0,12  | 1 |
| Vps37b    | 0,002311 | 0,155376 | 0,209 | 0,146 | 1 |
| Gsk3b     | 0,00232  | 0,124764 | 0,921 | 0,897 | 1 |
| Zfp94     | 0,002321 | -0,06009 | 0,086 | 0,148 | 1 |
| Sh3d19    | 0,002324 | 0,151247 | 0,49  | 0,443 | 1 |
| Fxyd7     | 0,002326 | -0,28021 | 0,088 | 0,148 | 1 |
| Chp1      | 0,002329 | -0,04536 | 0,338 | 0,458 | 1 |
| Homez     | 0,002335 | -0,0467  | 0,048 | 0,097 | 1 |
| Sort1     | 0,002336 | 0,109838 | 0,989 | 0,985 | 1 |
| Ift88     | 0,00234  | -0,05845 | 0,103 | 0,169 | 1 |
| Gm32250   | 0,002345 | -0,01674 | 0     | 0,017 | 1 |
| Chgb      | 0,002345 | -0,01674 | 0     | 0,017 | 1 |
| Nkain4    | 0,002345 | -0,01674 | 0     | 0,017 | 1 |
| Sncb      | 0,002345 | -0,01674 | 0     | 0,017 | 1 |
| Gm29502   | 0,002345 | -0,01674 | 0     | 0,017 | 1 |
| Prkcz     | 0,002348 | -0,0818  | 0,875 | 0,903 | 1 |



|          |          |          |       |       |   |
|----------|----------|----------|-------|-------|---|
| Mak16    | 0,002349 | -0,04152 | 0,237 | 0,338 | 1 |
| Slc3a2   | 0,00235  | 0,139574 | 0,822 | 0,764 | 1 |
| Gng12    | 0,002356 | -0,08879 | 0,789 | 0,852 | 1 |
| Pard3b   | 0,002357 | 0,035363 | 0,029 | 0,004 | 1 |
| Ift140   | 0,002368 | -0,05391 | 0,097 | 0,162 | 1 |
| Nadk     | 0,00237  | -0,064   | 0,314 | 0,426 | 1 |
| Lyp1a1   | 0,002372 | -0,04303 | 0,033 | 0,076 | 1 |
| Tatdn3   | 0,002378 | -0,05564 | 0,116 | 0,186 | 1 |
| Nck1     | 0,002391 | -0,05039 | 0,169 | 0,253 | 1 |
| Rhbdd3   | 0,002395 | -0,06035 | 0,11  | 0,177 | 1 |
| Dr1      | 0,0024   | -0,04183 | 0,207 | 0,3   | 1 |
| Kat6a    | 0,002401 | 0,152282 | 0,672 | 0,656 | 1 |
| Aph1b    | 0,002403 | -0,05485 | 0,178 | 0,264 | 1 |
| Acd      | 0,002408 | -0,05739 | 0,123 | 0,194 | 1 |
| Vps37a   | 0,002408 | -0,05728 | 0,406 | 0,536 | 1 |
| Ttc7b    | 0,002413 | -0,07014 | 0,147 | 0,222 | 1 |
| Gm9856   | 0,002414 | -0,03422 | 0,044 | 0,093 | 1 |
| Mrpl49   | 0,002416 | -0,07494 | 0,22  | 0,304 | 1 |
| Farsa    | 0,002418 | -0,05306 | 0,244 | 0,338 | 1 |
| Sned1    | 0,00242  | 0,144657 | 0,323 | 0,243 | 1 |
| Igf1r    | 0,002427 | -0,06798 | 0,512 | 0,635 | 1 |
| Ccdc73   | 0,002439 | -0,0415  | 0,048 | 0,097 | 1 |
| Letm1    | 0,002439 | -0,04404 | 0,371 | 0,496 | 1 |
| Bag6     | 0,002448 | 0,126442 | 0,679 | 0,633 | 1 |
| Tk2      | 0,002456 | -0,05511 | 0,134 | 0,207 | 1 |
| Eif3m    | 0,002457 | -0,0633  | 0,683 | 0,776 | 1 |
| Arl16    | 0,002459 | -0,05667 | 0,145 | 0,222 | 1 |
| Wls      | 0,002459 | 0,136398 | 0,8   | 0,757 | 1 |
| Zfp422   | 0,002466 | -0,04103 | 0,136 | 0,209 | 1 |
| Selenoo  | 0,002469 | -0,0428  | 0,264 | 0,371 | 1 |
| Slc1a5   | 0,002476 | 0,054699 | 0,059 | 0,021 | 1 |
| Tbl3     | 0,00248  | -0,05764 | 0,167 | 0,249 | 1 |
| Gigyf1   | 0,002483 | 0,173991 | 0,585 | 0,568 | 1 |
| Gm42756  | 0,002497 | -0,10491 | 0,321 | 0,418 | 1 |
| 2310057M | 0,0025   | -0,05339 | 0,163 | 0,243 | 1 |
| Usp54    | 0,002504 | 0,115885 | 0,861 | 0,838 | 1 |
| Rae1     | 0,002509 | -0,07743 | 0,244 | 0,329 | 1 |
| Mxra7    | 0,002524 | 0,074291 | 0,141 | 0,082 | 1 |
| Slc35a1  | 0,00253  | -0,0644  | 0,165 | 0,243 | 1 |
| Pacsin2  | 0,002533 | -0,05515 | 0,206 | 0,295 | 1 |
| Prepl    | 0,002536 | -0,0662  | 0,139 | 0,213 | 1 |
| 9630009A | 0,00254  | -0,04172 | 0,066 | 0,122 | 1 |
| Rrm2b    | 0,002545 | -0,04724 | 0,413 | 0,54  | 1 |
| 9530077C | 0,00255  | -0,03834 | 0,066 | 0,122 | 1 |
| Memo1    | 0,002559 | -0,0573  | 0,128 | 0,2   | 1 |
| Psmg2    | 0,002564 | -0,05308 | 0,224 | 0,316 | 1 |
| Flad1    | 0,002577 | -0,04093 | 0,163 | 0,247 | 1 |
| Sspn     | 0,002577 | -0,0425  | 0,411 | 0,555 | 1 |
| Fam98c   | 0,002578 | -0,04932 | 0,172 | 0,255 | 1 |
| Pex1     | 0,002582 | -0,06454 | 0,253 | 0,35  | 1 |
| Scap     | 0,002585 | -0,06186 | 0,4   | 0,532 | 1 |
| Plxna2   | 0,002591 | 0,090888 | 0,13  | 0,074 | 1 |

|          |          |          |       |       |   |
|----------|----------|----------|-------|-------|---|
| Trip12   | 0,002591 | 0,136298 | 0,633 | 0,593 | 1 |
| Dlst     | 0,002592 | -0,04691 | 0,464 | 0,601 | 1 |
| Ggta1    | 0,002597 | -0,03921 | 0,018 | 0,053 | 1 |
| Ncor1    | 0,002613 | 0,108494 | 0,919 | 0,897 | 1 |
| Mfap1b   | 0,00262  | -0,06894 | 0,47  | 0,593 | 1 |
| Bud23    | 0,002625 | -0,0514  | 0,224 | 0,316 | 1 |
| Gpat4    | 0,002627 | -0,0358  | 0,406 | 0,549 | 1 |
| Dnaic2   | 0,002638 | -0,04533 | 0,035 | 0,078 | 1 |
| Clasp2   | 0,002641 | 0,068628 | 0,998 | 0,983 | 1 |
| Arl6ip6  | 0,002644 | -0,037   | 0,172 | 0,259 | 1 |
| Ctp      | 0,002648 | -0,04443 | 0,092 | 0,156 | 1 |
| Eif2a    | 0,002649 | -0,04963 | 0,422 | 0,561 | 1 |
| Sergef   | 0,00265  | -0,06035 | 0,117 | 0,186 | 1 |
| Tmem132a | 0,002652 | -0,05707 | 0,143 | 0,217 | 1 |
| Cdc27    | 0,002656 | -0,06712 | 0,217 | 0,304 | 1 |
| Txlng    | 0,00266  | -0,05854 | 0,171 | 0,253 | 1 |
| Spidr    | 0,002664 | -0,06734 | 0,11  | 0,175 | 1 |
| Tti1     | 0,00267  | -0,04806 | 0,086 | 0,148 | 1 |
| Tcf12    | 0,002672 | 0,126385 | 0,895 | 0,854 | 1 |
| Phpt1    | 0,002673 | -0,07046 | 0,55  | 0,677 | 1 |
| Ruvbl2   | 0,002675 | -0,04685 | 0,25  | 0,35  | 1 |
| Abhd14b  | 0,002676 | -0,04888 | 0,182 | 0,266 | 1 |
| Mettl21a | 0,002678 | -0,0509  | 0,086 | 0,148 | 1 |
| Eipr1    | 0,002686 | -0,05671 | 0,202 | 0,289 | 1 |
| Lpcat4   | 0,002688 | -0,03756 | 0,075 | 0,135 | 1 |
| Riox2    | 0,00269  | -0,05134 | 0,077 | 0,135 | 1 |
| Supt6    | 0,002696 | 0,134254 | 0,62  | 0,601 | 1 |
| Eno2     | 0,002697 | 0,097454 | 0,218 | 0,146 | 1 |
| Zfp995   | 0,0027   | -0,03342 | 0,018 | 0,053 | 1 |
| Adgrl1   | 0,0027   | -0,05302 | 0,083 | 0,143 | 1 |
| Zfp629   | 0,002703 | -0,04293 | 0,07  | 0,127 | 1 |
| Srf      | 0,00272  | 0,113952 | 0,218 | 0,152 | 1 |
| Mkl2     | 0,002733 | -0,0615  | 0,182 | 0,266 | 1 |
| Pigv     | 0,002735 | -0,05374 | 0,117 | 0,186 | 1 |
| Stard6   | 0,002736 | -0,03883 | 0,015 | 0,046 | 1 |
| Gm42726  | 0,002738 | 0,098058 | 0,211 | 0,143 | 1 |
| Raly     | 0,002747 | 0,101531 | 0,89  | 0,863 | 1 |
| Sec14l1  | 0,002747 | 0,165058 | 0,532 | 0,487 | 1 |
| P3h4     | 0,002748 | -0,09882 | 0,615 | 0,717 | 1 |
| Bbs7     | 0,002749 | -0,04894 | 0,053 | 0,103 | 1 |
| Dhx8     | 0,002751 | -0,04634 | 0,172 | 0,255 | 1 |
| Cradd    | 0,002761 | -0,04686 | 0,158 | 0,238 | 1 |
| Ubqln1   | 0,002763 | 0,122983 | 0,793 | 0,741 | 1 |
| Slc12a2  | 0,002765 | -0,05919 | 0,998 | 0,998 | 1 |
| Nfasc    | 0,002777 | 0,097165 | 0,985 | 0,989 | 1 |
| Wdr5b    | 0,002782 | -0,03288 | 0,05  | 0,099 | 1 |
| Cyp4f17  | 0,002784 | -0,02835 | 0,011 | 0,04  | 1 |
| 6430548M | 0,002789 | -0,06387 | 0,171 | 0,251 | 1 |
| Ptgds    | 0,00279  | -0,26824 | 0,941 | 0,835 | 1 |
| Dido1    | 0,002793 | -0,04848 | 0,283 | 0,39  | 1 |
| Taco1os  | 0,002794 | -0,0535  | 0,055 | 0,105 | 1 |
| Tor1aip2 | 0,002798 | -0,04958 | 0,459 | 0,593 | 1 |

|           |          |          |       |       |   |
|-----------|----------|----------|-------|-------|---|
| Jmjd7     | 0,0028   | -0,05134 | 0,077 | 0,135 | 1 |
| Maz       | 0,002801 | 0,111252 | 0,639 | 0,603 | 1 |
| Flrt1     | 0,002801 | 0,126442 | 0,15  | 0,093 | 1 |
| Ei24      | 0,002816 | -0,07439 | 0,633 | 0,728 | 1 |
| Rab5a     | 0,002834 | -0,07769 | 0,818 | 0,869 | 1 |
| Spata24   | 0,002842 | -0,05979 | 0,158 | 0,236 | 1 |
| Snx9      | 0,002848 | -0,06126 | 0,316 | 0,424 | 1 |
| G6pc3     | 0,00285  | -0,04823 | 0,372 | 0,494 | 1 |
| Tsen34    | 0,002853 | -0,07696 | 0,534 | 0,643 | 1 |
| Gm32856   | 0,002862 | -0,03142 | 0,015 | 0,046 | 1 |
| Med22     | 0,00287  | -0,06668 | 0,229 | 0,316 | 1 |
| Pmp22     | 0,002872 | 0,148542 | 0,989 | 0,954 | 1 |
| Slc25a1   | 0,002877 | -0,04055 | 0,442 | 0,57  | 1 |
| Extl2     | 0,002879 | -0,04813 | 0,317 | 0,43  | 1 |
| Man1a     | 0,00288  | 0,112574 | 0,139 | 0,082 | 1 |
| Wasf1     | 0,002881 | -0,05931 | 0,272 | 0,369 | 1 |
| Rtl5      | 0,002881 | -0,02384 | 0,006 | 0,03  | 1 |
| Socs1     | 0,002887 | 0,048653 | 0,037 | 0,008 | 1 |
| Kdelr1    | 0,002907 | -0,06617 | 0,565 | 0,709 | 1 |
| 0610030Ez | 0,002907 | -0,05536 | 0,288 | 0,388 | 1 |
| Tradd     | 0,002908 | -0,05076 | 0,226 | 0,321 | 1 |
| Tmem104   | 0,002918 | -0,05912 | 0,106 | 0,171 | 1 |
| Gm16133   | 0,002918 | 0,03995  | 0,037 | 0,008 | 1 |
| Aktip     | 0,002926 | -0,08706 | 0,71  | 0,793 | 1 |
| Slc25a14  | 0,002939 | -0,05863 | 0,15  | 0,226 | 1 |
| Lemd2     | 0,002939 | -0,05116 | 0,361 | 0,47  | 1 |
| Scarb1    | 0,002944 | -0,06237 | 0,145 | 0,219 | 1 |
| Cep5711   | 0,002947 | -0,06673 | 0,172 | 0,251 | 1 |
| Wnt4      | 0,002948 | 0,025044 | 0,024 | 0,002 | 1 |
| Med27     | 0,00296  | -0,04716 | 0,165 | 0,247 | 1 |
| Mars2     | 0,002962 | -0,05154 | 0,112 | 0,179 | 1 |
| Rps6ka5   | 0,002963 | -0,08696 | 0,543 | 0,66  | 1 |
| A430005L1 | 0,002965 | -0,05282 | 0,255 | 0,348 | 1 |
| Ddb1      | 0,002965 | 0,129377 | 0,728 | 0,703 | 1 |
| Selenon   | 0,002965 | -0,05536 | 0,303 | 0,403 | 1 |
| Dym       | 0,002971 | -0,06174 | 0,194 | 0,278 | 1 |
| Dnajb14   | 0,002974 | -0,07883 | 0,739 | 0,829 | 1 |
| Cdc42     | 0,002974 | -0,06594 | 0,993 | 0,992 | 1 |
| R3hcc1    | 0,002975 | -0,08041 | 0,255 | 0,342 | 1 |
| Med4      | 0,002976 | -0,03595 | 0,35  | 0,475 | 1 |
| Zscan26   | 0,002978 | -0,07127 | 0,347 | 0,449 | 1 |
| 6030458C: | 0,002978 | -0,04735 | 0,143 | 0,217 | 1 |
| Rpl36a    | 0,002979 | -0,05807 | 0,95  | 0,958 | 1 |
| Naa60     | 0,003003 | -0,04625 | 0,228 | 0,319 | 1 |
| Gm43567   | 0,003007 | -0,02317 | 0,002 | 0,021 | 1 |
| Gja1      | 0,003018 | -0,01904 | 0,002 | 0,021 | 1 |
| Gm29650   | 0,003018 | -0,01904 | 0,002 | 0,021 | 1 |
| Pkm       | 0,003025 | 0,099534 | 0,901 | 0,871 | 1 |
| Jade1     | 0,003027 | 0,168248 | 0,541 | 0,496 | 1 |
| Adipor1   | 0,003027 | -0,06812 | 0,778 | 0,833 | 1 |
| Pigh      | 0,003028 | -0,04125 | 0,121 | 0,192 | 1 |
| Lipt2     | 0,003029 | -0,05226 | 0,084 | 0,143 | 1 |

|          |          |          |       |       |   |
|----------|----------|----------|-------|-------|---|
| Mal      | 0,003032 | -0,07244 | 1     | 0,996 | 1 |
| Dnajc8   | 0,003033 | -0,07447 | 0,745 | 0,833 | 1 |
| Mthfd2   | 0,003052 | -0,05488 | 0,308 | 0,414 | 1 |
| Fut8     | 0,003054 | -0,07235 | 0,558 | 0,69  | 1 |
| Flrt3    | 0,003058 | -0,04861 | 0,046 | 0,093 | 1 |
| Hbq1b    | 0,00306  | -0,02954 | 0,002 | 0,021 | 1 |
| Wdr66    | 0,003061 | 0,023573 | 0,018 | 0     | 1 |
| C1qtnf4  | 0,003067 | -0,02749 | 0,004 | 0,025 | 1 |
| Nsun3    | 0,003068 | -0,03045 | 0,024 | 0,061 | 1 |
| Ntan1    | 0,003069 | -0,0516  | 0,572 | 0,707 | 1 |
| Mpdu1    | 0,003073 | -0,08236 | 0,464 | 0,565 | 1 |
| Kcnj2    | 0,003074 | -0,02898 | 0,138 | 0,215 | 1 |
| Prkrip1  | 0,003076 | -0,06558 | 0,239 | 0,329 | 1 |
| Ndst4    | 0,003077 | -0,02339 | 0,004 | 0,025 | 1 |
| Slc46a1  | 0,003077 | -0,01721 | 0,002 | 0,021 | 1 |
| Pou3f3   | 0,003085 | 0,133081 | 0,848 | 0,819 | 1 |
| Psen1    | 0,003092 | -0,07391 | 0,461 | 0,574 | 1 |
| Dscam    | 0,003096 | 0,034025 | 0,044 | 0,013 | 1 |
| Prkcq    | 0,003101 | -0,08614 | 0,38  | 0,485 | 1 |
| Sgk1     | 0,003104 | -0,12247 | 0,49  | 0,584 | 1 |
| Kif21b   | 0,003105 | -0,06427 | 0,163 | 0,243 | 1 |
| Akap7    | 0,003106 | -0,04658 | 0,277 | 0,38  | 1 |
| Dolpp1   | 0,003121 | -0,04891 | 0,117 | 0,186 | 1 |
| Tlnrd1   | 0,003124 | -0,04495 | 0,066 | 0,12  | 1 |
| Bbc3     | 0,003157 | 0,081687 | 0,156 | 0,095 | 1 |
| Bcl10    | 0,003161 | -0,07171 | 0,363 | 0,456 | 1 |
| Rnf121   | 0,003169 | -0,05769 | 0,248 | 0,344 | 1 |
| Rexo4    | 0,003171 | -0,0625  | 0,215 | 0,3   | 1 |
| Mtmr10   | 0,003177 | 0,135315 | 0,644 | 0,61  | 1 |
| Pnrc1    | 0,003178 | 0,145847 | 0,771 | 0,724 | 1 |
| Slc22a15 | 0,003179 | -0,06129 | 0,161 | 0,238 | 1 |
| Zmynd19  | 0,003186 | -0,04069 | 0,105 | 0,171 | 1 |
| Cops7a   | 0,003201 | -0,05189 | 0,325 | 0,443 | 1 |
| Fam120b  | 0,003207 | -0,05144 | 0,301 | 0,405 | 1 |
| Tpd52l2  | 0,003211 | -0,05807 | 0,602 | 0,719 | 1 |
| Rhoj     | 0,003214 | 0,14671  | 0,332 | 0,251 | 1 |
| Cep44    | 0,003216 | -0,04099 | 0,196 | 0,285 | 1 |
| Ppp1r15b | 0,003226 | 0,153449 | 0,517 | 0,475 | 1 |
| Gm14296  | 0,003231 | -0,03829 | 0,138 | 0,213 | 1 |
| Mrps22   | 0,003232 | -0,05691 | 0,183 | 0,266 | 1 |
| Tcea2    | 0,003237 | -0,04562 | 0,068 | 0,122 | 1 |
| Lingo2   | 0,003242 | -0,03601 | 0,026 | 0,063 | 1 |
| Thap7    | 0,003243 | -0,05498 | 0,2   | 0,285 | 1 |
| Usp7     | 0,003252 | 0,171576 | 0,523 | 0,489 | 1 |
| Zfp563   | 0,003252 | -0,0395  | 0,061 | 0,114 | 1 |
| Zfp773   | 0,003256 | -0,05391 | 0,081 | 0,139 | 1 |
| Ormdl3   | 0,00326  | -0,04017 | 0,292 | 0,401 | 1 |
| Rgl1     | 0,003263 | 0,075035 | 0,139 | 0,082 | 1 |
| Lrfn4    | 0,003264 | 0,0749   | 0,123 | 0,07  | 1 |
| BC029722 | 0,003278 | -0,074   | 0,38  | 0,487 | 1 |
| Brd7     | 0,003279 | -0,06928 | 0,615 | 0,711 | 1 |
| Erlin2   | 0,003281 | -0,06547 | 0,323 | 0,424 | 1 |

|           |          |          |       |       |   |
|-----------|----------|----------|-------|-------|---|
| Pcdhga10  | 0,003294 | -0,0362  | 0,026 | 0,063 | 1 |
| Rbm10     | 0,003296 | -0,05614 | 0,295 | 0,397 | 1 |
| Efcab2    | 0,003313 | -0,07805 | 0,11  | 0,173 | 1 |
| Uqcc1     | 0,003319 | -0,06082 | 0,161 | 0,236 | 1 |
| Mapk1ip1  | 0,003329 | -0,05076 | 0,211 | 0,295 | 1 |
| 9330020H  | 0,00333  | -0,03183 | 0,02  | 0,055 | 1 |
| Tomm34    | 0,003331 | -0,04882 | 0,383 | 0,502 | 1 |
| Pgap1     | 0,003334 | -0,05543 | 0,347 | 0,466 | 1 |
| Cyb561d1  | 0,003335 | -0,03651 | 0,053 | 0,103 | 1 |
| 1110051M  | 0,003338 | -0,0637  | 0,264 | 0,357 | 1 |
| B230217C  | 0,003349 | -0,05876 | 0,147 | 0,219 | 1 |
| Naa10     | 0,003365 | -0,04035 | 0,266 | 0,365 | 1 |
| Tiparp    | 0,003368 | 0,260866 | 0,272 | 0,213 | 1 |
| Thap11    | 0,003372 | -0,0527  | 0,229 | 0,321 | 1 |
| Tmem206   | 0,003378 | -0,04009 | 0,112 | 0,179 | 1 |
| Cyp20a1   | 0,003387 | -0,0657  | 0,506 | 0,633 | 1 |
| Cep95     | 0,003399 | -0,0344  | 0,097 | 0,162 | 1 |
| Zbtb26    | 0,003401 | -0,05121 | 0,081 | 0,139 | 1 |
| Ap4b1     | 0,003409 | -0,05048 | 0,099 | 0,162 | 1 |
| Gnpat1    | 0,003417 | -0,06433 | 0,204 | 0,285 | 1 |
| Dtwd2     | 0,003427 | -0,04288 | 0,048 | 0,095 | 1 |
| Skap2     | 0,003438 | -0,04645 | 0,576 | 0,694 | 1 |
| Gm29394   | 0,003439 | -0,02114 | 0,029 | 0,07  | 1 |
| Bin3      | 0,00344  | -0,05627 | 0,138 | 0,211 | 1 |
| Ptprn     | 0,003441 | -0,03378 | 0,231 | 0,323 | 1 |
| Rcc1l     | 0,003447 | -0,05257 | 0,121 | 0,19  | 1 |
| 1110002LC | 0,00345  | -0,04981 | 0,075 | 0,131 | 1 |
| Klhl26    | 0,003453 | -0,05715 | 0,075 | 0,131 | 1 |
| Atxn3     | 0,00346  | -0,05851 | 0,259 | 0,35  | 1 |
| Zkscan5   | 0,003482 | -0,04891 | 0,116 | 0,184 | 1 |
| Nthl1     | 0,003482 | -0,04515 | 0,178 | 0,262 | 1 |
| Trmt112   | 0,003482 | -0,06033 | 0,618 | 0,738 | 1 |
| D16Ert47  | 0,003492 | -0,06494 | 0,82  | 0,88  | 1 |
| Ntsr2     | 0,003511 | -0,02835 | 0,009 | 0,036 | 1 |
| Hoxd1     | 0,00352  | -0,05766 | 0,116 | 0,181 | 1 |
| Sbf2      | 0,003523 | 0,188588 | 0,543 | 0,519 | 1 |
| Dpp3      | 0,003523 | -0,06102 | 0,261 | 0,352 | 1 |
| Egln2     | 0,003527 | -0,04601 | 0,411 | 0,538 | 1 |
| Gm5       | 0,003536 | -0,05873 | 0,119 | 0,186 | 1 |
| Wdr70     | 0,003537 | -0,05769 | 0,341 | 0,445 | 1 |
| 1700096K  | 0,003538 | -0,04868 | 0,154 | 0,23  | 1 |
| Metap1    | 0,003555 | -0,05415 | 0,279 | 0,371 | 1 |
| Ebag9     | 0,003555 | -0,05721 | 0,196 | 0,278 | 1 |
| 2810455O  | 0,003558 | -0,02429 | 0,009 | 0,036 | 1 |
| Ifnar2    | 0,003565 | -0,06771 | 0,328 | 0,426 | 1 |
| Fuca1     | 0,003578 | -0,07921 | 0,741 | 0,829 | 1 |
| Trp53cor1 | 0,003583 | -0,03261 | 0,009 | 0,036 | 1 |
| Mettl18   | 0,003588 | -0,0292  | 0,017 | 0,049 | 1 |
| Gm14410   | 0,003588 | -0,0292  | 0,017 | 0,049 | 1 |
| Stk39     | 0,003597 | -0,07749 | 0,73  | 0,81  | 1 |
| Thap1     | 0,003598 | -0,06162 | 0,176 | 0,255 | 1 |
| B230303O  | 0,003601 | -0,03342 | 0,017 | 0,049 | 1 |

|          |          |          |       |       |   |
|----------|----------|----------|-------|-------|---|
| Gm49042  | 0,003608 | -0,03059 | 0,013 | 0,042 | 1 |
| Copg1    | 0,003612 | -0,06257 | 0,325 | 0,437 | 1 |
| Riok3    | 0,003616 | -0,04997 | 0,481 | 0,599 | 1 |
| Atp5g3   | 0,003619 | -0,06999 | 0,806 | 0,863 | 1 |
| Mvp      | 0,003625 | 0,1792   | 0,521 | 0,492 | 1 |
| Nol8     | 0,003626 | -0,04491 | 0,275 | 0,373 | 1 |
| Atp1b2   | 0,003628 | -0,04901 | 0,057 | 0,108 | 1 |
| Pex3     | 0,003637 | -0,06025 | 0,334 | 0,443 | 1 |
| Spef2    | 0,003645 | -0,07153 | 0,079 | 0,135 | 1 |
| Fam198b  | 0,003646 | -0,04194 | 0,022 | 0,057 | 1 |
| Mocs2    | 0,003651 | -0,04479 | 0,464 | 0,584 | 1 |
| Nup93    | 0,00366  | -0,05149 | 0,073 | 0,129 | 1 |
| Skiv2l2  | 0,003664 | -0,04805 | 0,418 | 0,549 | 1 |
| Ran      | 0,003664 | -0,0694  | 0,857 | 0,903 | 1 |
| Tmem256  | 0,003672 | -0,05646 | 0,945 | 0,951 | 1 |
| Ttc9c    | 0,003684 | -0,03696 | 0,229 | 0,321 | 1 |
| Dopey2   | 0,003692 | -0,06828 | 0,429 | 0,553 | 1 |
| Triobp   | 0,0037   | -0,0534  | 0,167 | 0,245 | 1 |
| Ltbp1    | 0,003701 | 0,04064  | 0,028 | 0,004 | 1 |
| BC024139 | 0,003704 | -0,04479 | 0,051 | 0,099 | 1 |
| Uso1     | 0,003709 | -0,04924 | 0,332 | 0,449 | 1 |
| Cdc40    | 0,00371  | -0,0378  | 0,378 | 0,508 | 1 |
| Slc25a24 | 0,003712 | 0,037125 | 0,028 | 0,004 | 1 |
| Ddit3    | 0,003721 | 0,2346   | 0,684 | 0,667 | 1 |
| Kmt2d    | 0,003725 | 0,166023 | 0,453 | 0,405 | 1 |
| Lcmt1    | 0,003729 | -0,05466 | 0,341 | 0,449 | 1 |
| Shisa5   | 0,003736 | -0,05748 | 0,099 | 0,16  | 1 |
| Katnbl1  | 0,003741 | -0,04932 | 0,172 | 0,253 | 1 |
| Ngdn     | 0,003742 | -0,04253 | 0,383 | 0,502 | 1 |
| Platr25  | 0,003748 | -0,05584 | 0,097 | 0,158 | 1 |
| Mtif3    | 0,003748 | -0,0527  | 0,165 | 0,241 | 1 |
| Rpl7     | 0,003753 | -0,07644 | 0,989 | 0,989 | 1 |
| Ecd      | 0,003758 | -0,0452  | 0,251 | 0,352 | 1 |
| Dtx3     | 0,003781 | -0,0281  | 0,418 | 0,542 | 1 |
| Maged2   | 0,003781 | -0,05498 | 0,231 | 0,319 | 1 |
| C1ql2    | 0,003793 | 0,040294 | 0,028 | 0,004 | 1 |
| Zfp931   | 0,003793 | -0,0344  | 0,079 | 0,137 | 1 |
| Itgav    | 0,003799 | -0,093   | 0,76  | 0,812 | 1 |
| Ago4     | 0,003799 | -0,04754 | 0,051 | 0,099 | 1 |
| D130020L | 0,003801 | -0,03959 | 0,05  | 0,097 | 1 |
| Slc25a16 | 0,003813 | -0,04502 | 0,152 | 0,228 | 1 |
| Pnpla2   | 0,00382  | -0,05414 | 0,312 | 0,411 | 1 |
| Med6     | 0,003859 | -0,0562  | 0,176 | 0,255 | 1 |
| Zfp850   | 0,003861 | -0,02539 | 0,013 | 0,042 | 1 |
| Tagap1   | 0,003869 | -0,04813 | 0,079 | 0,135 | 1 |
| Slco3a1  | 0,003872 | -0,10693 | 0,969 | 0,958 | 1 |
| Wfikkn2  | 0,003872 | -0,03402 | 0,022 | 0,057 | 1 |
| Clk3     | 0,003878 | -0,0562  | 0,264 | 0,361 | 1 |
| Cntn1    | 0,003887 | -0,09321 | 0,062 | 0,114 | 1 |
| Srgap2   | 0,003888 | -0,05842 | 0,253 | 0,346 | 1 |
| Hypk     | 0,003892 | -0,07562 | 0,523 | 0,646 | 1 |
| BC052040 | 0,003902 | -0,05333 | 0,084 | 0,141 | 1 |

|           |          |          |       |       |   |
|-----------|----------|----------|-------|-------|---|
| Slc25a17  | 0,003918 | -0,03645 | 0,244 | 0,34  | 1 |
| Zfp119b   | 0,003919 | -0,03203 | 0,022 | 0,057 | 1 |
| 6230400D  | 0,003925 | -0,04144 | 0,035 | 0,076 | 1 |
| Ccni      | 0,003936 | 0,139618 | 0,699 | 0,656 | 1 |
| Vamp2     | 0,003942 | -0,06272 | 0,829 | 0,895 | 1 |
| Zfp668    | 0,003951 | -0,04342 | 0,061 | 0,112 | 1 |
| Kdm6a     | 0,003957 | 0,151797 | 0,604 | 0,574 | 1 |
| Mrrf      | 0,003957 | -0,05914 | 0,139 | 0,209 | 1 |
| Sh3glb2   | 0,003958 | -0,05525 | 0,505 | 0,641 | 1 |
| Elp2      | 0,003967 | -0,06143 | 0,231 | 0,316 | 1 |
| Agpat5    | 0,003978 | -0,0591  | 0,45  | 0,565 | 1 |
| Lrig3     | 0,003981 | -0,03111 | 0,286 | 0,397 | 1 |
| Zdhhc20   | 0,00399  | -0,09036 | 0,969 | 0,964 | 1 |
| Riok2     | 0,004012 | -0,0395  | 0,161 | 0,241 | 1 |
| Tll1      | 0,004026 | -0,05196 | 0,084 | 0,141 | 1 |
| Klf15     | 0,004033 | -0,05388 | 0,198 | 0,281 | 1 |
| Wwp1      | 0,004046 | -0,06751 | 0,538 | 0,648 | 1 |
| Tfdp2     | 0,004059 | -0,06989 | 0,547 | 0,658 | 1 |
| Tbpl1     | 0,004061 | -0,06547 | 0,194 | 0,274 | 1 |
| Rap2c     | 0,004062 | -0,0639  | 0,2   | 0,281 | 1 |
| Bckdk     | 0,004064 | -0,05454 | 0,262 | 0,354 | 1 |
| Kmt2c     | 0,004073 | 0,138647 | 0,787 | 0,736 | 1 |
| Eif4a1    | 0,004078 | 0,104396 | 0,993 | 0,983 | 1 |
| Retreg2   | 0,004081 | 0,117873 | 0,758 | 0,7   | 1 |
| Fam210a   | 0,004092 | -0,06193 | 0,2   | 0,283 | 1 |
| Afap1l2   | 0,004103 | 0,052017 | 0,05  | 0,017 | 1 |
| Pnkp      | 0,004111 | -0,04305 | 0,261 | 0,354 | 1 |
| Dsel      | 0,004135 | -0,08481 | 0,138 | 0,205 | 1 |
| Cpsf4     | 0,00416  | -0,04971 | 0,099 | 0,16  | 1 |
| Tipin     | 0,004172 | -0,06422 | 0,193 | 0,272 | 1 |
| A230057Dl | 0,004179 | -0,03908 | 0,116 | 0,184 | 1 |
| Snx5      | 0,004182 | -0,07852 | 0,613 | 0,732 | 1 |
| Sp7       | 0,004199 | -0,05358 | 0,121 | 0,188 | 1 |
| Kmt5c     | 0,004206 | -0,05861 | 0,13  | 0,198 | 1 |
| Nxpe3     | 0,004226 | -0,05904 | 0,182 | 0,259 | 1 |
| Abtb1     | 0,004234 | -0,05852 | 0,167 | 0,243 | 1 |
| Prrc2c    | 0,004235 | 0,098239 | 0,965 | 0,951 | 1 |
| Epb41l4a  | 0,004238 | -0,04262 | 0,088 | 0,148 | 1 |
| Prox2     | 0,004241 | -0,03692 | 0,042 | 0,086 | 1 |
| Rcl1      | 0,004244 | -0,05103 | 0,156 | 0,23  | 1 |
| Gm26825   | 0,004245 | 0,148586 | 0,123 | 0,072 | 1 |
| Cdadc1    | 0,004248 | -0,05625 | 0,363 | 0,464 | 1 |
| Scrn2     | 0,004253 | -0,04901 | 0,068 | 0,12  | 1 |
| Fbxl2     | 0,004258 | -0,04754 | 0,057 | 0,105 | 1 |
| Adap1     | 0,004262 | 0,12232  | 0,956 | 0,956 | 1 |
| Slc52a2   | 0,004264 | -0,06061 | 0,123 | 0,188 | 1 |
| Mgll      | 0,004269 | -0,07173 | 0,206 | 0,291 | 1 |
| Zfp51     | 0,004278 | -0,04619 | 0,046 | 0,091 | 1 |
| Fbxo28    | 0,004282 | -0,04899 | 0,49  | 0,616 | 1 |
| Tdg       | 0,004287 | -0,05282 | 0,222 | 0,31  | 1 |
| Pdss2     | 0,00429  | -0,05197 | 0,101 | 0,162 | 1 |
| Osgepl1   | 0,004304 | -0,04555 | 0,112 | 0,177 | 1 |

|          |          |          |       |       |   |
|----------|----------|----------|-------|-------|---|
| Dpf2     | 0,004311 | -0,03422 | 0,4   | 0,525 | 1 |
| Arf6     | 0,004314 | -0,03092 | 0,213 | 0,304 | 1 |
| Gtf2h3   | 0,004315 | -0,04267 | 0,117 | 0,184 | 1 |
| Ppp2r2a  | 0,004324 | 0,109876 | 0,974 | 0,956 | 1 |
| Nmi      | 0,004339 | -0,04476 | 0,092 | 0,152 | 1 |
| Actr2    | 0,004342 | 0,120056 | 0,767 | 0,743 | 1 |
| Odf2     | 0,00435  | -0,03343 | 0,332 | 0,445 | 1 |
| Thsd1    | 0,00435  | -0,05303 | 0,07  | 0,122 | 1 |
| Tsen2    | 0,004369 | -0,04682 | 0,178 | 0,257 | 1 |
| Phyhipl  | 0,00437  | 0,118764 | 0,978 | 0,956 | 1 |
| S100b    | 0,004375 | 0,094903 | 0,905 | 0,791 | 1 |
| Pars2    | 0,004379 | -0,03167 | 0,029 | 0,068 | 1 |
| Dnm3os   | 0,004392 | -0,02856 | 0,035 | 0,076 | 1 |
| Mrpl52   | 0,004395 | -0,08771 | 0,6   | 0,679 | 1 |
| Tpcn1    | 0,0044   | -0,06568 | 0,231 | 0,319 | 1 |
| Ccar1    | 0,004401 | 0,150765 | 0,615 | 0,586 | 1 |
| Hba-a1   | 0,004406 | -2,45088 | 0,024 | 0,059 | 1 |
| Igf2bp2  | 0,004412 | 0,057281 | 0,035 | 0,008 | 1 |
| 2610021A | 0,004413 | -0,069   | 0,128 | 0,194 | 1 |
| Kctd14   | 0,004419 | 0,04135  | 0,031 | 0,006 | 1 |
| Bms1     | 0,004433 | -0,06105 | 0,228 | 0,31  | 1 |
| Slc38a1  | 0,004445 | -0,03902 | 0,015 | 0,044 | 1 |
| Gm7173   | 0,004446 | -0,01466 | 0     | 0,015 | 1 |
| Stmn2    | 0,004446 | -0,01466 | 0     | 0,015 | 1 |
| Tac1     | 0,004446 | -0,01466 | 0     | 0,015 | 1 |
| Gm39318  | 0,004446 | -0,01466 | 0     | 0,015 | 1 |
| Gm17399  | 0,004446 | -0,01466 | 0     | 0,015 | 1 |
| Ppp1r3c  | 0,004446 | -0,01466 | 0     | 0,015 | 1 |
| Nrgn     | 0,004446 | -0,01881 | 0     | 0,015 | 1 |
| Mlc1     | 0,004446 | -0,01881 | 0     | 0,015 | 1 |
| Ccp110   | 0,004454 | -0,13958 | 0,862 | 0,835 | 1 |
| Tmem115  | 0,004461 | -0,06272 | 0,338 | 0,439 | 1 |
| Cbx4     | 0,004464 | 0,13747  | 0,686 | 0,662 | 1 |
| Ube2e1   | 0,004465 | -0,03987 | 0,483 | 0,612 | 1 |
| Ssh1     | 0,004466 | 0,100004 | 0,189 | 0,127 | 1 |
| Thsd4    | 0,00447  | -0,03384 | 0,062 | 0,114 | 1 |
| Manba    | 0,004472 | 0,106586 | 0,257 | 0,19  | 1 |
| 2510046G | 0,00448  | -0,03422 | 0,024 | 0,059 | 1 |
| Snupn    | 0,004495 | -0,05476 | 0,171 | 0,247 | 1 |
| Aaas     | 0,004498 | -0,04509 | 0,099 | 0,16  | 1 |
| Rps29    | 0,004499 | -0,04292 | 1     | 1     | 1 |
| Ss18     | 0,004499 | -0,0488  | 0,461 | 0,593 | 1 |
| Snu13    | 0,004501 | -0,0675  | 0,916 | 0,93  | 1 |
| Pacrg    | 0,004525 | -0,02783 | 0,018 | 0,051 | 1 |
| Tmbim1   | 0,004528 | -0,06876 | 0,983 | 0,996 | 1 |
| Rps17    | 0,004536 | -0,06115 | 0,987 | 0,983 | 1 |
| Zfp866   | 0,004539 | -0,06904 | 0,145 | 0,215 | 1 |
| Nup43    | 0,004551 | -0,04754 | 0,059 | 0,108 | 1 |
| Ppp1r1b  | 0,004583 | -0,02878 | 0,015 | 0,044 | 1 |
| Brf2     | 0,004588 | -0,05683 | 0,114 | 0,177 | 1 |
| Sumo3    | 0,004595 | -0,04847 | 0,479 | 0,614 | 1 |
| Mafa     | 0,004601 | 0,035774 | 0,042 | 0,013 | 1 |



|          |          |          |       |       |   |
|----------|----------|----------|-------|-------|---|
| Sco1     | 0,004608 | -0,03589 | 0,081 | 0,137 | 1 |
| Tbc1d20  | 0,004615 | -0,07307 | 0,268 | 0,357 | 1 |
| Cep250   | 0,004617 | -0,04427 | 0,163 | 0,241 | 1 |
| Syf2     | 0,004619 | -0,06652 | 0,908 | 0,928 | 1 |
| App      | 0,004629 | -0,05714 | 1     | 0,998 | 1 |
| Mlx      | 0,00463  | -0,05931 | 0,261 | 0,348 | 1 |
| Ikzf2    | 0,004631 | -0,06006 | 0,301 | 0,399 | 1 |
| Rftn2    | 0,004634 | -0,05772 | 0,319 | 0,426 | 1 |
| Zfp869   | 0,004637 | -0,04462 | 0,048 | 0,093 | 1 |
| Ankmy1   | 0,004638 | 0,060548 | 0,097 | 0,051 | 1 |
| Rundc3a  | 0,004649 | -0,05624 | 0,409 | 0,519 | 1 |
| Tcof1    | 0,00465  | -0,03666 | 0,229 | 0,321 | 1 |
| Cc2d1b   | 0,004655 | -0,04204 | 0,316 | 0,424 | 1 |
| Ncs1     | 0,004664 | -0,07238 | 0,139 | 0,207 | 1 |
| Ap3m2    | 0,004666 | -0,05489 | 0,171 | 0,247 | 1 |
| Tbc1d22a | 0,004668 | -0,06136 | 0,15  | 0,219 | 1 |
| Mgat4b   | 0,004669 | -0,04861 | 0,283 | 0,376 | 1 |
| Gbe1     | 0,004673 | -0,03941 | 0,081 | 0,137 | 1 |
| Mbtps2   | 0,004685 | -0,04495 | 0,229 | 0,319 | 1 |
| Snx19    | 0,004691 | -0,06096 | 0,215 | 0,295 | 1 |
| Cct3     | 0,004693 | -0,071   | 0,822 | 0,878 | 1 |
| Maff     | 0,004694 | 0,031943 | 0,035 | 0,008 | 1 |
| Tpra1    | 0,004699 | -0,04298 | 0,112 | 0,177 | 1 |
| Ilf2     | 0,004702 | -0,05991 | 0,675 | 0,778 | 1 |
| Lamp2    | 0,004707 | 0,103987 | 0,996 | 0,977 | 1 |
| Tmem268  | 0,004711 | -0,03198 | 0,264 | 0,361 | 1 |
| Mzf1     | 0,004713 | -0,02676 | 0,011 | 0,038 | 1 |
| Cnot8    | 0,004731 | -0,04981 | 0,301 | 0,401 | 1 |
| Rabep2   | 0,004733 | -0,04762 | 0,121 | 0,188 | 1 |
| Dusp5    | 0,00474  | 0,026828 | 0,022 | 0,002 | 1 |
| Ikbkap   | 0,004758 | -0,06053 | 0,172 | 0,249 | 1 |
| Triap1   | 0,004784 | -0,05459 | 0,189 | 0,268 | 1 |
| E2f4     | 0,004801 | -0,05681 | 0,139 | 0,209 | 1 |
| Tceanc2  | 0,004802 | -0,04937 | 0,194 | 0,274 | 1 |
| Dmap1    | 0,004808 | -0,04608 | 0,242 | 0,329 | 1 |
| Tspan15  | 0,004821 | -0,05477 | 0,958 | 0,956 | 1 |
| Brix1    | 0,004829 | -0,04325 | 0,301 | 0,403 | 1 |
| Magee1   | 0,004838 | -0,04708 | 0,259 | 0,352 | 1 |
| Pofut1   | 0,004842 | -0,04803 | 0,167 | 0,243 | 1 |
| Zfp748   | 0,004851 | -0,04442 | 0,149 | 0,222 | 1 |
| Ergic3   | 0,004857 | -0,08083 | 0,692 | 0,757 | 1 |
| Actn1    | 0,004877 | -0,03478 | 0,068 | 0,12  | 1 |
| Gm26935  | 0,004907 | -0,03818 | 0,026 | 0,061 | 1 |
| Ptcd3    | 0,004908 | -0,04241 | 0,207 | 0,293 | 1 |
| L3mbtl2  | 0,004913 | -0,07015 | 0,176 | 0,247 | 1 |
| Susd6    | 0,004917 | -0,03943 | 0,299 | 0,407 | 1 |
| Tmem218  | 0,004924 | -0,03537 | 0,048 | 0,093 | 1 |
| Tbcel    | 0,004926 | -0,06843 | 0,341 | 0,439 | 1 |
| Tinf2    | 0,004935 | -0,05967 | 0,103 | 0,162 | 1 |
| Usp14    | 0,004938 | -0,05564 | 0,361 | 0,468 | 1 |
| Ift80    | 0,004965 | -0,04541 | 0,2   | 0,283 | 1 |
| Katnal1  | 0,004966 | 0,148104 | 0,589 | 0,549 | 1 |

|           |          |          |       |       |   |
|-----------|----------|----------|-------|-------|---|
| Ccdc187   | 0,004968 | -0,05257 | 0,11  | 0,173 | 1 |
| Zfp933    | 0,004973 | -0,05212 | 0,099 | 0,158 | 1 |
| Asb11     | 0,004983 | 0,021779 | 0,017 | 0     | 1 |
| Zfp949    | 0,004994 | -0,065   | 0,167 | 0,238 | 1 |
| Pak1      | 0,004999 | 0,116701 | 0,989 | 0,962 | 1 |
| Atrn      | 0,005007 | 0,126934 | 0,802 | 0,772 | 1 |
| ldh3g     | 0,005016 | -0,07706 | 0,521 | 0,629 | 1 |
| Luzp1     | 0,005032 | -0,05039 | 0,061 | 0,11  | 1 |
| Ube2i     | 0,005057 | -0,07311 | 0,576 | 0,694 | 1 |
| Mthfd1l   | 0,00506  | -0,04102 | 0,061 | 0,11  | 1 |
| Calm3     | 0,005065 | -0,06896 | 0,967 | 0,97  | 1 |
| Usp8      | 0,005069 | -0,06585 | 0,497 | 0,61  | 1 |
| Hdac8     | 0,005072 | -0,04762 | 0,125 | 0,192 | 1 |
| Mfge8     | 0,005072 | 0,138017 | 0,47  | 0,405 | 1 |
| Syap1     | 0,005092 | -0,05001 | 0,305 | 0,407 | 1 |
| Klhl7     | 0,005092 | -0,04954 | 0,163 | 0,238 | 1 |
| Bap1      | 0,005094 | -0,05271 | 0,158 | 0,23  | 1 |
| Otulin    | 0,005094 | -0,07549 | 0,275 | 0,359 | 1 |
| Uvrag     | 0,005103 | -0,05308 | 0,218 | 0,302 | 1 |
| Mars      | 0,005125 | -0,04346 | 0,264 | 0,359 | 1 |
| Lin52     | 0,005142 | -0,05747 | 0,154 | 0,226 | 1 |
| Zfp251    | 0,005143 | -0,05566 | 0,147 | 0,215 | 1 |
| Fkrp      | 0,005152 | -0,05678 | 0,169 | 0,243 | 1 |
| Rpap1     | 0,005153 | -0,02807 | 0,117 | 0,181 | 1 |
| Gemin6    | 0,005153 | -0,04132 | 0,051 | 0,097 | 1 |
| Pogz      | 0,005156 | 0,112636 | 0,305 | 0,238 | 1 |
| Zfp354a   | 0,005162 | -0,04278 | 0,094 | 0,152 | 1 |
| 2310011JC | 0,005168 | -0,06754 | 0,499 | 0,61  | 1 |
| Dazap2    | 0,005171 | 0,12126  | 0,927 | 0,878 | 1 |
| Dynlt1b   | 0,005186 | -0,02202 | 0,006 | 0,027 | 1 |
| Rbm25     | 0,005188 | 0,0894   | 0,956 | 0,956 | 1 |
| Bcas1os1  | 0,00519  | 0,047884 | 0,055 | 0,021 | 1 |
| Tenm2     | 0,005207 | -0,04295 | 0,086 | 0,143 | 1 |
| Rhno1     | 0,005212 | -0,05145 | 0,152 | 0,224 | 1 |
| Ttc14     | 0,005213 | -0,05348 | 0,695 | 0,831 | 1 |
| Arpc5     | 0,005215 | 0,10435  | 0,936 | 0,903 | 1 |
| Acsbg1    | 0,005225 | -0,01611 | 0,006 | 0,027 | 1 |
| Bcas3     | 0,005229 | -0,06479 | 0,314 | 0,403 | 1 |
| Gm4673    | 0,005235 | -0,04839 | 0,15  | 0,222 | 1 |
| Unc119    | 0,005255 | -0,03264 | 0,026 | 0,061 | 1 |
| Msh6      | 0,005264 | -0,04474 | 0,123 | 0,188 | 1 |
| Mettl17   | 0,005268 | -0,04073 | 0,075 | 0,129 | 1 |
| Wdr74     | 0,005274 | -0,04441 | 0,196 | 0,276 | 1 |
| Nectin3   | 0,005286 | -0,03457 | 0,108 | 0,173 | 1 |
| B3galt6   | 0,005286 | -0,0617  | 0,112 | 0,173 | 1 |
| Grpel2    | 0,005297 | -0,04847 | 0,237 | 0,327 | 1 |
| Gtf2a1    | 0,00531  | 0,131712 | 0,739 | 0,711 | 1 |
| Zfp111    | 0,005317 | -0,04276 | 0,077 | 0,131 | 1 |
| Aptx      | 0,005317 | -0,07474 | 0,191 | 0,262 | 1 |
| Polr2e    | 0,005352 | -0,07172 | 0,6   | 0,7   | 1 |
| Commd10   | 0,005376 | -0,05283 | 0,204 | 0,285 | 1 |
| Btbd19    | 0,005384 | -0,03031 | 0,033 | 0,072 | 1 |

|           |          |          |       |       |   |
|-----------|----------|----------|-------|-------|---|
| Rnf24     | 0,0054   | -0,07217 | 0,128 | 0,192 | 1 |
| Rbm28     | 0,005402 | -0,04494 | 0,477 | 0,61  | 1 |
| Lias      | 0,005403 | -0,04843 | 0,308 | 0,405 | 1 |
| Ppp2r5d   | 0,005406 | -0,04946 | 0,185 | 0,264 | 1 |
| Dnal1     | 0,005418 | -0,05525 | 0,138 | 0,205 | 1 |
| Pgam5     | 0,005429 | -0,03422 | 0,136 | 0,205 | 1 |
| Atg13     | 0,005431 | -0,05589 | 0,222 | 0,306 | 1 |
| Stambp    | 0,005436 | -0,08649 | 0,492 | 0,603 | 1 |
| Rprd1a    | 0,00549  | -0,02231 | 0,407 | 0,538 | 1 |
| Surf4     | 0,005493 | -0,04403 | 0,369 | 0,479 | 1 |
| Tmem50b   | 0,005494 | -0,04764 | 0,378 | 0,498 | 1 |
| 4930452G  | 0,005494 | -0,02625 | 0,02  | 0,053 | 1 |
| Fam122b   | 0,005497 | -0,04801 | 0,134 | 0,203 | 1 |
| Rab11fp2  | 0,005501 | -0,0914  | 0,543 | 0,652 | 1 |
| Dhx29     | 0,005511 | -0,05809 | 0,202 | 0,278 | 1 |
| Ankrd52   | 0,005514 | -0,06485 | 0,125 | 0,188 | 1 |
| Skil      | 0,005516 | 0,188568 | 0,383 | 0,327 | 1 |
| Cntd1     | 0,005519 | -0,0321  | 0,048 | 0,093 | 1 |
| Emc1      | 0,005523 | 0,117261 | 0,743 | 0,743 | 1 |
| Sertad2   | 0,005544 | 0,151133 | 0,516 | 0,477 | 1 |
| Pomgnt1   | 0,005572 | -0,05884 | 0,457 | 0,578 | 1 |
| Haus5     | 0,005573 | -0,03242 | 0,101 | 0,162 | 1 |
| Prpf8     | 0,005582 | 0,146092 | 0,587 | 0,565 | 1 |
| Gm17949   | 0,005589 | -0,02134 | 0,004 | 0,023 | 1 |
| Kcna2     | 0,005594 | 0,168001 | 0,246 | 0,184 | 1 |
| Hspa1b    | 0,005598 | 0,525008 | 0,424 | 0,363 | 1 |
| Capn9     | 0,005607 | -0,01928 | 0,004 | 0,023 | 1 |
| Tmem38a   | 0,005611 | -0,04736 | 0,101 | 0,16  | 1 |
| Prrc2b    | 0,005617 | 0,131587 | 0,661 | 0,635 | 1 |
| Hfe       | 0,005621 | -0,01904 | 0,002 | 0,019 | 1 |
| Gpm6a     | 0,005621 | -0,02111 | 0,002 | 0,019 | 1 |
| Gripap1   | 0,005623 | -0,0458  | 0,417 | 0,536 | 1 |
| Cspp1     | 0,005629 | -0,0401  | 0,398 | 0,53  | 1 |
| Tmeff2    | 0,00563  | -0,04938 | 0,96  | 0,979 | 1 |
| Neu4      | 0,005631 | -0,01698 | 0,002 | 0,019 | 1 |
| Pm20d2    | 0,005631 | -0,01698 | 0,002 | 0,019 | 1 |
| Tmem100   | 0,005631 | -0,01698 | 0,002 | 0,019 | 1 |
| Aard      | 0,005631 | -0,01698 | 0,002 | 0,019 | 1 |
| Taf6      | 0,005633 | -0,03973 | 0,161 | 0,236 | 1 |
| Sdhaf3    | 0,005637 | -0,0408  | 0,092 | 0,15  | 1 |
| H2afz     | 0,005645 | -0,04974 | 0,82  | 0,888 | 1 |
| Map3k4    | 0,005659 | -0,05098 | 0,325 | 0,428 | 1 |
| Sp1       | 0,005667 | 0,151565 | 0,497 | 0,466 | 1 |
| AC110241. | 0,005674 | -0,05345 | 0,103 | 0,162 | 1 |
| A830009LC | 0,005675 | -0,02157 | 0,004 | 0,023 | 1 |
| Tmem150c  | 0,005687 | -0,06783 | 0,369 | 0,468 | 1 |
| Zfp658    | 0,005688 | -0,03167 | 0,033 | 0,072 | 1 |
| Zcchc3    | 0,005698 | -0,04427 | 0,149 | 0,219 | 1 |
| Adhfe1    | 0,005699 | -0,03304 | 0,028 | 0,063 | 1 |
| Zfp414    | 0,005699 | -0,01685 | 0,211 | 0,302 | 1 |
| Pcp4      | 0,005708 | -0,01928 | 0,002 | 0,019 | 1 |
| Rpgrip1l  | 0,005711 | -0,0564  | 0,138 | 0,205 | 1 |

|         |          |          |       |       |   |
|---------|----------|----------|-------|-------|---|
| Gm26699 | 0,00576  | -0,02571 | 0,16  | 0,234 | 1 |
| Hmg20a  | 0,005781 | -0,06185 | 0,341 | 0,435 | 1 |
| Ptrh2   | 0,005791 | -0,04498 | 0,206 | 0,283 | 1 |
| Capza1  | 0,005811 | -0,03792 | 0,367 | 0,481 | 1 |
| Bag1    | 0,005822 | -0,05094 | 0,361 | 0,464 | 1 |
| Cdc45   | 0,005827 | -0,0322  | 0,009 | 0,034 | 1 |
| Dusp26  | 0,00584  | -0,07556 | 0,914 | 0,949 | 1 |
| Ide     | 0,005862 | -0,07094 | 0,468 | 0,565 | 1 |
| Utp14b  | 0,005869 | 0,247121 | 0,431 | 0,39  | 1 |
| Shd     | 0,005881 | -0,02539 | 0,017 | 0,046 | 1 |
| Cenpj   | 0,005888 | -0,05193 | 0,046 | 0,089 | 1 |
| Strap   | 0,005889 | -0,05144 | 0,628 | 0,743 | 1 |
| Trem2   | 0,005904 | -0,02407 | 0,009 | 0,034 | 1 |
| Kcnk5   | 0,005912 | -0,04102 | 0,064 | 0,114 | 1 |
| Rrp8    | 0,005915 | -0,0233  | 0,147 | 0,219 | 1 |
| Sec23b  | 0,005915 | -0,04934 | 0,376 | 0,489 | 1 |
| Arfgap1 | 0,005929 | -0,04911 | 0,272 | 0,367 | 1 |
| Afdn    | 0,005929 | 0,1074   | 0,692 | 0,671 | 1 |
| Aatf    | 0,005949 | -0,03736 | 0,251 | 0,342 | 1 |
| Gm45847 | 0,005973 | -0,02876 | 0,033 | 0,072 | 1 |
| Gm17135 | 0,006047 | 0,027959 | 0,026 | 0,004 | 1 |
| Prcp    | 0,006054 | -0,05105 | 0,292 | 0,386 | 1 |
| Pycrl   | 0,006054 | -0,05368 | 0,174 | 0,249 | 1 |
| Gm26910 | 0,006057 | -0,03422 | 0,053 | 0,099 | 1 |
| Dcdc2b  | 0,006058 | -0,03024 | 0,022 | 0,055 | 1 |
| Dars    | 0,006078 | -0,06337 | 0,545 | 0,662 | 1 |
| Tarsl2  | 0,00608  | -0,04051 | 0,277 | 0,367 | 1 |
| Tmem263 | 0,006084 | -0,05116 | 0,222 | 0,302 | 1 |
| Tnni1   | 0,006092 | -0,07481 | 0,606 | 0,717 | 1 |
| Rplp0   | 0,006111 | -0,02279 | 0,996 | 0,992 | 1 |
| Bfar    | 0,006113 | -0,0678  | 0,341 | 0,439 | 1 |
| Psmb3   | 0,006115 | -0,06992 | 0,897 | 0,945 | 1 |
| Yod1    | 0,006118 | -0,04236 | 0,231 | 0,321 | 1 |
| Car11   | 0,006119 | -0,0476  | 0,161 | 0,232 | 1 |
| Zmym6   | 0,006139 | -0,05111 | 0,189 | 0,268 | 1 |
| Sec22a  | 0,006166 | -0,05377 | 0,2   | 0,278 | 1 |
| Usp24   | 0,006198 | -0,01466 | 0,288 | 0,401 | 1 |
| Milr1   | 0,006209 | 0,061281 | 0,044 | 0,015 | 1 |
| Hoxd8   | 0,006219 | -0,08101 | 0,648 | 0,745 | 1 |
| Gtf3c1  | 0,00622  | -0,06209 | 0,413 | 0,525 | 1 |
| Fam60a  | 0,006226 | -0,03632 | 0,053 | 0,099 | 1 |
| Gm3435  | 0,006248 | -0,03659 | 0,029 | 0,065 | 1 |
| Zdhhc9  | 0,006278 | 0,131866 | 0,699 | 0,694 | 1 |
| Mdm2    | 0,006291 | 0,170576 | 0,626 | 0,605 | 1 |
| Ttc3    | 0,006296 | 0,113477 | 0,829 | 0,772 | 1 |
| Prr3    | 0,006316 | -0,05311 | 0,182 | 0,255 | 1 |
| Ehd4    | 0,006317 | -0,03251 | 0,13  | 0,198 | 1 |
| Xrcc6   | 0,006336 | -0,04759 | 0,268 | 0,357 | 1 |
| Alkbh5  | 0,006344 | 0,132186 | 0,732 | 0,698 | 1 |
| Snx6    | 0,006398 | -0,0629  | 0,752 | 0,827 | 1 |
| Gorasp1 | 0,006398 | -0,04831 | 0,145 | 0,213 | 1 |
| Fscn1   | 0,006399 | -0,07335 | 0,945 | 0,922 | 1 |

|           |          |          |       |       |   |
|-----------|----------|----------|-------|-------|---|
| Pced1a    | 0,00641  | -0,0395  | 0,092 | 0,15  | 1 |
| Atf7      | 0,006419 | 0,134235 | 0,552 | 0,53  | 1 |
| 60304070I | 0,006422 | -0,05391 | 0,099 | 0,156 | 1 |
| Tldc1     | 0,006424 | -0,03481 | 0,029 | 0,065 | 1 |
| Utp18     | 0,006446 | -0,04034 | 0,198 | 0,276 | 1 |
| Vat1l     | 0,006447 | 0,045857 | 0,044 | 0,015 | 1 |
| Eif4h     | 0,006457 | -0,04548 | 0,985 | 0,985 | 1 |
| Ubp1      | 0,006472 | -0,03784 | 0,275 | 0,369 | 1 |
| Ice1      | 0,006479 | -0,05299 | 0,369 | 0,481 | 1 |
| Arpc3     | 0,006489 | -0,0698  | 0,679 | 0,783 | 1 |
| Wdr53     | 0,006494 | -0,04908 | 0,09  | 0,146 | 1 |
| Ccng2     | 0,006495 | -0,0096  | 0,206 | 0,295 | 1 |
| Babam2    | 0,0065   | -0,08202 | 0,4   | 0,494 | 1 |
| Rere      | 0,006501 | 0,147553 | 0,622 | 0,605 | 1 |
| Bcdin3d   | 0,006514 | -0,0594  | 0,139 | 0,205 | 1 |
| Snx14     | 0,006519 | -0,0451  | 0,235 | 0,323 | 1 |
| Spata7    | 0,006523 | -0,0924  | 0,139 | 0,207 | 1 |
| Smyd2     | 0,00654  | -0,05419 | 0,185 | 0,257 | 1 |
| Rab11fip4 | 0,006542 | 0,12832  | 0,517 | 0,475 | 1 |
| Rbak      | 0,006555 | -0,04217 | 0,163 | 0,238 | 1 |
| Cap1      | 0,006597 | -0,0536  | 0,539 | 0,665 | 1 |
| Pcif1     | 0,006606 | -0,04914 | 0,477 | 0,599 | 1 |
| Ranbp3    | 0,006611 | -0,04965 | 0,314 | 0,409 | 1 |
| Smndc1    | 0,00662  | -0,04011 | 0,497 | 0,618 | 1 |
| Hivep3    | 0,006642 | 0,187913 | 0,424 | 0,378 | 1 |
| Armc10    | 0,006666 | -0,05927 | 0,136 | 0,2   | 1 |
| Plcb3     | 0,006673 | 0,039265 | 0,04  | 0,013 | 1 |
| B230219D  | 0,006676 | -0,07071 | 0,829 | 0,865 | 1 |
| Atp8b5    | 0,006677 | -0,05007 | 0,061 | 0,108 | 1 |
| Nt5c2     | 0,006679 | -0,06274 | 0,194 | 0,268 | 1 |
| Dcaf13    | 0,006688 | -0,03238 | 0,226 | 0,316 | 1 |
| Rnf11     | 0,006691 | -0,05992 | 0,561 | 0,688 | 1 |
| Kif3a     | 0,006722 | 0,113758 | 0,892 | 0,882 | 1 |
| Fbxl17    | 0,006724 | -0,04968 | 0,18  | 0,253 | 1 |
| Thnsl1    | 0,006729 | -0,0594  | 0,123 | 0,184 | 1 |
| Zrsr1     | 0,006731 | -0,06682 | 0,345 | 0,435 | 1 |
| Fign      | 0,006736 | -0,03268 | 0,299 | 0,401 | 1 |
| Ubr2      | 0,006768 | 0,107282 | 0,796 | 0,768 | 1 |
| Lcp1      | 0,006778 | -0,03702 | 0,068 | 0,118 | 1 |
| Kbtbd3    | 0,006812 | -0,056   | 0,165 | 0,236 | 1 |
| Zc3h14    | 0,006923 | -0,03639 | 0,33  | 0,437 | 1 |
| Tfe3      | 0,006925 | -0,03604 | 0,169 | 0,245 | 1 |
| Shtn1     | 0,006937 | -0,06409 | 0,897 | 0,937 | 1 |
| Chchd6    | 0,006959 | -0,04094 | 0,204 | 0,283 | 1 |
| Oat       | 0,006974 | -0,07003 | 0,49  | 0,605 | 1 |
| S1pr5     | 0,006976 | -0,08677 | 0,853 | 0,882 | 1 |
| Fam180a   | 0,006988 | 0,032601 | 0,037 | 0,011 | 1 |
| Gm26532   | 0,006993 | 0,077881 | 0,072 | 0,034 | 1 |
| Tor1b     | 0,007004 | -0,05235 | 0,349 | 0,454 | 1 |
| Phf7      | 0,007016 | -0,03597 | 0,039 | 0,078 | 1 |
| Ehd1      | 0,007044 | -0,0885  | 0,628 | 0,713 | 1 |
| Topbp1    | 0,00705  | -0,05751 | 0,158 | 0,228 | 1 |

|           |          |          |       |       |   |
|-----------|----------|----------|-------|-------|---|
| Ankrd10   | 0,007064 | -0,0324  | 0,301 | 0,405 | 1 |
| Pex12     | 0,007075 | -0,06121 | 0,088 | 0,141 | 1 |
| Prkar2a   | 0,007082 | -0,0494  | 0,152 | 0,222 | 1 |
| Gm14391   | 0,007092 | -0,02794 | 0,029 | 0,065 | 1 |
| Gm26526   | 0,007099 | -0,05398 | 0,229 | 0,31  | 1 |
| Rfc3      | 0,007111 | -0,04059 | 0,112 | 0,173 | 1 |
| Nucb2     | 0,007128 | -0,02668 | 0,024 | 0,057 | 1 |
| Trappc11  | 0,007133 | -0,06344 | 0,189 | 0,259 | 1 |
| Maip1     | 0,007135 | -0,04649 | 0,193 | 0,27  | 1 |
| Ybey      | 0,007137 | -0,05663 | 0,081 | 0,133 | 1 |
| Chmp6     | 0,007153 | -0,04474 | 0,128 | 0,192 | 1 |
| Pex14     | 0,007159 | -0,05954 | 0,233 | 0,312 | 1 |
| Kdm5c     | 0,007168 | 0,121358 | 0,429 | 0,371 | 1 |
| Synj1     | 0,007173 | -0,04558 | 0,4   | 0,519 | 1 |
| Appbp2    | 0,007195 | 0,116074 | 0,842 | 0,808 | 1 |
| 2310022A: | 0,007207 | -0,05406 | 0,101 | 0,158 | 1 |
| Supt7l    | 0,007214 | -0,04875 | 0,172 | 0,247 | 1 |
| Wbp11     | 0,007223 | -0,06322 | 0,615 | 0,717 | 1 |
| Herpud2   | 0,007232 | -0,04694 | 0,462 | 0,584 | 1 |
| Ndufaf6   | 0,007249 | -0,03286 | 0,039 | 0,078 | 1 |
| Cwc22     | 0,007252 | -0,04721 | 0,152 | 0,222 | 1 |
| Tbc1d10a  | 0,007252 | -0,03308 | 0,057 | 0,103 | 1 |
| Hps3      | 0,007281 | -0,05257 | 0,167 | 0,238 | 1 |
| Ppp1r15a  | 0,007288 | 0,220029 | 0,332 | 0,283 | 1 |
| A930028Nl | 0,007292 | -0,04005 | 0,04  | 0,08  | 1 |
| Rfk       | 0,007294 | -0,03014 | 0,303 | 0,399 | 1 |
| Gpr17     | 0,007297 | -0,03402 | 0,007 | 0,03  | 1 |
| Ragef4    | 0,007319 | -0,02814 | 0,007 | 0,03  | 1 |
| Cnep1r1   | 0,007326 | -0,0543  | 0,393 | 0,5   | 1 |
| Gm15834   | 0,007338 | -0,0218  | 0,007 | 0,03  | 1 |
| Mettl2    | 0,007391 | -0,03573 | 0,149 | 0,219 | 1 |
| Phf14     | 0,007414 | -0,0767  | 0,523 | 0,624 | 1 |
| Calr3     | 0,007442 | -0,02202 | 0,007 | 0,03  | 1 |
| Dedd      | 0,007452 | -0,05491 | 0,297 | 0,386 | 1 |
| Itm2c     | 0,007463 | 0,087785 | 0,963 | 0,916 | 1 |
| Tpm4      | 0,007473 | 0,103261 | 0,213 | 0,152 | 1 |
| Gm10282   | 0,007483 | -0,01998 | 0,007 | 0,03  | 1 |
| Trmt11    | 0,007499 | -0,04194 | 0,143 | 0,211 | 1 |
| Tfb1m     | 0,007501 | -0,03915 | 0,09  | 0,146 | 1 |
| Sacm1l    | 0,007501 | -0,03881 | 0,363 | 0,466 | 1 |
| Ero1lb    | 0,007502 | -0,03767 | 0,051 | 0,095 | 1 |
| Rars2     | 0,007506 | -0,05669 | 0,112 | 0,171 | 1 |
| Vac14     | 0,007513 | -0,03957 | 0,167 | 0,241 | 1 |
| Chd4      | 0,007522 | 0,13074  | 0,916 | 0,876 | 1 |
| Derl3     | 0,007539 | -0,03422 | 0,026 | 0,059 | 1 |
| Eml6      | 0,007549 | -0,04949 | 0,154 | 0,222 | 1 |
| Golga1    | 0,007553 | -0,0218  | 0,281 | 0,384 | 1 |
| Klhl32    | 0,007556 | 0,043749 | 0,081 | 0,04  | 1 |
| Zfp358    | 0,007563 | -0,05111 | 0,209 | 0,287 | 1 |
| Rab8a     | 0,007573 | -0,04938 | 0,336 | 0,432 | 1 |
| Nedd4     | 0,007576 | 0,098818 | 0,98  | 0,949 | 1 |
| Pum3      | 0,007582 | -0,03838 | 0,325 | 0,422 | 1 |

|          |          |          |       |       |   |
|----------|----------|----------|-------|-------|---|
| Rfc2     | 0,007594 | 0,140482 | 0,622 | 0,605 | 1 |
| Tuba1b   | 0,007595 | 0,167259 | 0,831 | 0,764 | 1 |
| Psme2    | 0,00763  | 0,00139  | 0,316 | 0,43  | 1 |
| Pigw     | 0,007631 | -0,01816 | 0,007 | 0,03  | 1 |
| A930024E | 0,007631 | -0,01635 | 0,007 | 0,03  | 1 |
| Patj     | 0,007632 | 0,026828 | 0,02  | 0,002 | 1 |
| Gfod2    | 0,007637 | 0,028132 | 0,086 | 0,141 | 1 |
| Pard6a   | 0,00764  | -0,0589  | 0,172 | 0,243 | 1 |
| Sgpp1    | 0,007644 | -0,04239 | 0,301 | 0,399 | 1 |
| Camk4    | 0,007644 | 0,028609 | 0,02  | 0,002 | 1 |
| Ttll4    | 0,007654 | -0,05954 | 0,103 | 0,158 | 1 |
| Pds5b    | 0,007659 | 0,164104 | 0,483 | 0,451 | 1 |
| Cyp4f14  | 0,00766  | -0,0415  | 0,051 | 0,095 | 1 |
| Ftsj1    | 0,007664 | -0,01744 | 0,248 | 0,338 | 1 |
| Tsc22d1  | 0,007667 | 0,173133 | 0,332 | 0,276 | 1 |
| Tspyl2   | 0,007678 | -0,02601 | 0,319 | 0,432 | 1 |
| Tbccd1   | 0,007694 | -0,05108 | 0,182 | 0,253 | 1 |
| Map2     | 0,007694 | -0,0366  | 0,226 | 0,312 | 1 |
| Atp13a2  | 0,007698 | -0,04119 | 0,187 | 0,264 | 1 |
| Scyl3    | 0,007706 | -0,02297 | 0,123 | 0,188 | 1 |
| 4930419G | 0,007749 | 0,026506 | 0,02  | 0,002 | 1 |
| Cryl1    | 0,007762 | 0,030058 | 0,02  | 0,002 | 1 |
| Nup54    | 0,007765 | -0,04903 | 0,187 | 0,262 | 1 |
| Rnf10    | 0,007787 | 0,104494 | 0,794 | 0,789 | 1 |
| Gm10073  | 0,007787 | -0,03343 | 0,033 | 0,07  | 1 |
| Vps26b   | 0,007802 | -0,06012 | 0,239 | 0,316 | 1 |
| Mllt11   | 0,007814 | -0,06072 | 0,138 | 0,2   | 1 |
| Elavl3   | 0,007824 | -0,04954 | 1     | 0,996 | 1 |
| Abca8b   | 0,007838 | -0,08016 | 0,246 | 0,323 | 1 |
| Hist1h1e | 0,007852 | -0,05229 | 0,143 | 0,209 | 1 |
| Rangrf   | 0,007898 | -0,03422 | 0,108 | 0,169 | 1 |
| Cmas     | 0,007905 | -0,03608 | 0,283 | 0,38  | 1 |
| B3gat2   | 0,007915 | -0,02247 | 0,011 | 0,036 | 1 |
| Ncoa4    | 0,007976 | 0,119964 | 0,639 | 0,597 | 1 |
| Wdr41    | 0,00799  | -0,05473 | 0,231 | 0,31  | 1 |
| 9430038I | 0,007992 | -0,03422 | 0,077 | 0,129 | 1 |
| Nfix     | 0,007997 | 0,082234 | 0,998 | 0,996 | 1 |
| Tmem216  | 0,007998 | -0,03306 | 0,04  | 0,08  | 1 |
| Prss36   | 0,008008 | -0,03171 | 0,05  | 0,093 | 1 |
| Trmt2a   | 0,008008 | -0,03928 | 0,237 | 0,321 | 1 |
| Psmc5    | 0,008034 | -0,06305 | 0,756 | 0,838 | 1 |
| Atxn7l1  | 0,008041 | -0,04694 | 0,088 | 0,141 | 1 |
| Cd44     | 0,008051 | 0,101584 | 0,117 | 0,07  | 1 |
| Tmem183a | 0,008052 | -0,04772 | 0,272 | 0,357 | 1 |
| Sri      | 0,008065 | -0,06722 | 0,69  | 0,789 | 1 |
| Fem1b    | 0,008084 | 0,111736 | 0,339 | 0,278 | 1 |
| Med24    | 0,008105 | -0,04968 | 0,171 | 0,243 | 1 |
| Mrps5    | 0,00812  | -0,0279  | 0,406 | 0,525 | 1 |
| Parp12   | 0,008128 | 0,072941 | 0,125 | 0,076 | 1 |
| Gm4950   | 0,008141 | 0,018182 | 0,015 | 0     | 1 |
| Lama5    | 0,008141 | 0,016379 | 0,015 | 0     | 1 |
| Mgp      | 0,008141 | 0,016379 | 0,015 | 0     | 1 |

|           |          |          |       |       |   |
|-----------|----------|----------|-------|-------|---|
| Ajuba     | 0,008141 | 0,016379 | 0,015 | 0     | 1 |
| Tmem95    | 0,008141 | 0,016379 | 0,015 | 0     | 1 |
| Pappa     | 0,008141 | 0,021779 | 0,015 | 0     | 1 |
| Tmem88    | 0,008141 | 0,021779 | 0,015 | 0     | 1 |
| Gm26545   | 0,008141 | 0,019982 | 0,015 | 0     | 1 |
| Podxl     | 0,008141 | 0,019982 | 0,015 | 0     | 1 |
| S100a8    | 0,008141 | 0,021779 | 0,015 | 0     | 1 |
| Tfap2a    | 0,008141 | 0,023573 | 0,015 | 0     | 1 |
| Ppm1n     | 0,008141 | 0,048353 | 0,015 | 0     | 1 |
| Polr3b    | 0,008158 | -0,0594  | 0,101 | 0,156 | 1 |
| Tmem185a  | 0,008167 | -0,03768 | 0,101 | 0,158 | 1 |
| 1700021FC | 0,008172 | -0,04706 | 0,15  | 0,217 | 1 |
| Alcam     | 0,008175 | -0,05998 | 0,628 | 0,726 | 1 |
| Vps51     | 0,008179 | -0,06107 | 0,09  | 0,141 | 1 |
| lkbkb     | 0,008195 | -0,04989 | 0,328 | 0,42  | 1 |
| Slc25a12  | 0,008202 | -0,05865 | 0,345 | 0,447 | 1 |
| Rnf146    | 0,008222 | -0,03592 | 0,435 | 0,549 | 1 |
| Rnf4      | 0,008225 | -0,05579 | 0,371 | 0,466 | 1 |
| Zfp707    | 0,00823  | -0,0378  | 0,066 | 0,114 | 1 |
| Ociad1    | 0,00824  | -0,05341 | 0,873 | 0,892 | 1 |
| Vps33b    | 0,008246 | -0,04081 | 0,134 | 0,198 | 1 |
| Cenpa     | 0,008251 | -0,02689 | 0,026 | 0,059 | 1 |
| Nhsl1     | 0,008262 | 0,050584 | 0,059 | 0,025 | 1 |
| Tceanc    | 0,008266 | -0,03725 | 0,064 | 0,112 | 1 |
| Tmem97    | 0,008272 | -0,05233 | 0,275 | 0,363 | 1 |
| Setd7     | 0,008275 | 0,112518 | 0,646 | 0,605 | 1 |
| Ccdc181   | 0,008301 | -0,04726 | 0,084 | 0,137 | 1 |
| Tor2a     | 0,008314 | -0,03742 | 0,163 | 0,236 | 1 |
| Pfdn1     | 0,008316 | -0,05842 | 0,593 | 0,69  | 1 |
| Uck1      | 0,008317 | -0,0495  | 0,281 | 0,369 | 1 |
| Fabp3     | 0,008324 | -0,03735 | 0,035 | 0,072 | 1 |
| Bcs1l     | 0,008349 | -0,03875 | 0,127 | 0,19  | 1 |
| Cyb5r4    | 0,008361 | -0,04441 | 0,189 | 0,264 | 1 |
| Snapc3    | 0,008382 | -0,05396 | 0,235 | 0,314 | 1 |
| Nicn1     | 0,008404 | -0,03978 | 0,255 | 0,342 | 1 |
| Preb      | 0,008424 | -0,01791 | 0,349 | 0,464 | 1 |
| Hemk1     | 0,008428 | -0,04102 | 0,07  | 0,118 | 1 |
| Gm7598    | 0,00846  | -0,01736 | 0,02  | 0,051 | 1 |
| Trak2     | 0,008469 | 0,099108 | 0,194 | 0,137 | 1 |
| Flot1     | 0,008481 | -0,07208 | 0,29  | 0,369 | 1 |
| Arxes2    | 0,008483 | -0,01258 | 0     | 0,013 | 1 |
| Ect2      | 0,008483 | -0,01258 | 0     | 0,013 | 1 |
| Postn     | 0,008483 | -0,01258 | 0     | 0,013 | 1 |
| Gm43653   | 0,008483 | -0,01258 | 0     | 0,013 | 1 |
| Gpr162    | 0,008483 | -0,01258 | 0     | 0,013 | 1 |
| 4932443L1 | 0,008483 | -0,01258 | 0     | 0,013 | 1 |
| 4933405L1 | 0,008483 | -0,01258 | 0     | 0,013 | 1 |
| Serp1b1b  | 0,008483 | -0,01258 | 0     | 0,013 | 1 |
| Ly6h      | 0,008483 | -0,01258 | 0     | 0,013 | 1 |
| Atp2b4    | 0,008483 | -0,01466 | 0     | 0,013 | 1 |
| Rlbp1     | 0,008483 | -0,01466 | 0     | 0,013 | 1 |
| Trim9     | 0,008483 | -0,01466 | 0     | 0,013 | 1 |



|          |          |          |       |       |   |
|----------|----------|----------|-------|-------|---|
| Cabp1    | 0,008483 | -0,01881 | 0     | 0,013 | 1 |
| Lrrc24   | 0,008483 | -0,01674 | 0     | 0,013 | 1 |
| Doc2g    | 0,008483 | -0,02088 | 0     | 0,013 | 1 |
| Ip6k2    | 0,008499 | -0,01639 | 0,308 | 0,411 | 1 |
| H2-T23   | 0,008513 | 0,107663 | 0,064 | 0,03  | 1 |
| Tap2     | 0,008513 | 0,060904 | 0,046 | 0,017 | 1 |
| Haus3    | 0,00853  | -0,03704 | 0,202 | 0,281 | 1 |
| Ncapd3   | 0,008534 | -0,0252  | 0,334 | 0,441 | 1 |
| Alg9     | 0,008543 | -0,03306 | 0,171 | 0,243 | 1 |
| Rab22a   | 0,008545 | 0,141423 | 0,541 | 0,513 | 1 |
| Gm12324  | 0,00856  | -0,03559 | 0,035 | 0,072 | 1 |
| Gm49375  | 0,008573 | -0,05642 | 0,048 | 0,089 | 1 |
| Ints10   | 0,008579 | -0,05337 | 0,191 | 0,262 | 1 |
| Fzr1     | 0,008582 | -0,04854 | 0,233 | 0,312 | 1 |
| Man2b1   | 0,008584 | -0,0231  | 0,262 | 0,354 | 1 |
| Nif3l1   | 0,008594 | -0,0436  | 0,092 | 0,146 | 1 |
| Zfp488   | 0,008619 | 0,05784  | 0,094 | 0,051 | 1 |
| Anapc10  | 0,008621 | -0,03604 | 0,172 | 0,247 | 1 |
| Afg3l2   | 0,008635 | -0,05395 | 0,167 | 0,234 | 1 |
| Pla2g6   | 0,008639 | -0,04491 | 0,108 | 0,167 | 1 |
| Kif2a    | 0,00866  | -0,02939 | 0,433 | 0,557 | 1 |
| Ado      | 0,008669 | -0,05533 | 0,983 | 0,977 | 1 |
| Cdk5rap2 | 0,008674 | -0,0794  | 0,561 | 0,65  | 1 |
| Txndc15  | 0,008689 | -0,06073 | 0,64  | 0,749 | 1 |
| Ube2b    | 0,00869  | -0,04256 | 0,798 | 0,873 | 1 |
| Ftl1     | 0,008694 | 0,134231 | 1     | 1     | 1 |
| Clic1    | 0,008712 | 0,043769 | 0,059 | 0,025 | 1 |
| Snx30    | 0,008713 | 0,1276   | 0,818 | 0,793 | 1 |
| Zcchc24  | 0,008725 | 0,133194 | 0,839 | 0,793 | 1 |
| Lypd6    | 0,00873  | 0,112542 | 0,183 | 0,129 | 1 |
| Rpap2    | 0,008736 | -0,04937 | 0,127 | 0,188 | 1 |
| Rnls     | 0,008737 | -0,03151 | 0,044 | 0,084 | 1 |
| Osbp     | 0,008776 | -0,06089 | 0,431 | 0,542 | 1 |
| Rps3a1   | 0,008778 | -0,03833 | 0,998 | 0,996 | 1 |
| 2010320M | 0,008783 | -0,03136 | 0,053 | 0,097 | 1 |
| Rcan1    | 0,008814 | -0,02818 | 0,165 | 0,238 | 1 |
| Zfp703   | 0,008824 | 0,104359 | 0,121 | 0,074 | 1 |
| Hectd4   | 0,008825 | -0,02964 | 0,284 | 0,382 | 1 |
| Renbp    | 0,008831 | 0,061274 | 0,09  | 0,049 | 1 |
| Hhatl    | 0,008832 | 0,22406  | 0,49  | 0,481 | 1 |
| Lrrc57   | 0,008843 | -0,0425  | 0,194 | 0,27  | 1 |
| Dnah8    | 0,008899 | -0,02384 | 0,006 | 0,025 | 1 |
| Nceh1    | 0,008932 | 0,166024 | 0,624 | 0,572 | 1 |
| Ppp1r13b | 0,008949 | 0,126562 | 0,303 | 0,247 | 1 |
| Ccdc50   | 0,00895  | 0,151273 | 0,611 | 0,593 | 1 |
| Thbs3    | 0,008973 | -0,05849 | 0,217 | 0,293 | 1 |
| Ptprz1   | 0,008978 | -0,01974 | 0,006 | 0,025 | 1 |
| Urgcp    | 0,008979 | -0,04167 | 0,16  | 0,228 | 1 |
| Sestd1   | 0,00899  | -0,0441  | 0,095 | 0,15  | 1 |
| Cstad    | 0,008992 | -0,01248 | 0,006 | 0,025 | 1 |
| Gm49086  | 0,009018 | -0,01405 | 0,006 | 0,025 | 1 |
| Gm27017  | 0,009018 | -0,01769 | 0,006 | 0,025 | 1 |

|            |          |          |       |       |   |
|------------|----------|----------|-------|-------|---|
| Psm12      | 0,009042 | -0,04766 | 0,536 | 0,652 | 1 |
| Tarbp2     | 0,009055 | -0,04706 | 0,149 | 0,215 | 1 |
| Fam160b2   | 0,009062 | -0,04007 | 0,125 | 0,186 | 1 |
| Fam131a    | 0,009087 | -0,05165 | 0,081 | 0,131 | 1 |
| Sars2      | 0,009095 | -0,0456  | 0,088 | 0,141 | 1 |
| Enpp3      | 0,009095 | -0,02334 | 0,028 | 0,061 | 1 |
| Sap18b     | 0,0091   | -0,02517 | 0,017 | 0,044 | 1 |
| Atad5      | 0,009116 | -0,02632 | 0,075 | 0,127 | 1 |
| Fbxl20     | 0,00912  | -0,03678 | 0,246 | 0,335 | 1 |
| Tmc3       | 0,009136 | -0,03458 | 0,084 | 0,137 | 1 |
| Man2c1     | 0,009154 | -0,06    | 0,242 | 0,319 | 1 |
| Acap2      | 0,00917  | -0,05628 | 0,771 | 0,846 | 1 |
| Igip       | 0,00919  | 0,149195 | 0,4   | 0,367 | 1 |
| Nmb        | 0,009192 | -0,03004 | 0,022 | 0,053 | 1 |
| Inpp5e     | 0,009194 | -0,03202 | 0,088 | 0,141 | 1 |
| Nalcn      | 0,009197 | -0,04325 | 0,057 | 0,101 | 1 |
| Gm13404    | 0,009201 | -0,02835 | 0,028 | 0,061 | 1 |
| Mavs       | 0,009213 | -0,05168 | 0,11  | 0,167 | 1 |
| Tia1       | 0,009218 | -0,07579 | 0,604 | 0,694 | 1 |
| Nfatc3     | 0,009232 | 0,131437 | 0,442 | 0,395 | 1 |
| Tlk1       | 0,009278 | -0,01578 | 0,367 | 0,487 | 1 |
| Mfsd3      | 0,009365 | -0,0572  | 0,099 | 0,154 | 1 |
| Tmem68     | 0,009379 | -0,03486 | 0,204 | 0,283 | 1 |
| Cabin1     | 0,009388 | -0,05191 | 0,209 | 0,285 | 1 |
| Fam149b    | 0,009396 | -0,0506  | 0,202 | 0,274 | 1 |
| Fam160a1   | 0,009404 | 0,024725 | 0,024 | 0,004 | 1 |
| Dcp1b      | 0,009408 | -0,04338 | 0,183 | 0,257 | 1 |
| Rmdn2      | 0,009413 | -0,04288 | 0,048 | 0,089 | 1 |
| Cnnm3      | 0,009419 | -0,04118 | 0,268 | 0,354 | 1 |
| Eri3       | 0,009446 | -0,04704 | 0,499 | 0,616 | 1 |
| Fmnl3      | 0,009458 | 0,038924 | 0,042 | 0,015 | 1 |
| Kctd18     | 0,009461 | -0,029   | 0,235 | 0,319 | 1 |
| Serpine1   | 0,009461 | 0,040294 | 0,024 | 0,004 | 1 |
| Csnk1e     | 0,009462 | -0,05647 | 0,653 | 0,753 | 1 |
| Dus4l      | 0,009504 | -0,0408  | 0,088 | 0,141 | 1 |
| Hoxa7      | 0,00952  | -0,02046 | 0,017 | 0,044 | 1 |
| Ctbs       | 0,009522 | -0,04571 | 0,117 | 0,177 | 1 |
| Dhx30      | 0,009536 | -0,03054 | 0,426 | 0,551 | 1 |
| Zfp418     | 0,009548 | -0,03266 | 0,037 | 0,074 | 1 |
| Nol10      | 0,00956  | -0,03031 | 0,077 | 0,129 | 1 |
| Hist2h2aa1 | 0,009561 | -0,02926 | 0,055 | 0,099 | 1 |
| Lmnb2      | 0,009575 | -0,0572  | 0,101 | 0,154 | 1 |
| Mpv17      | 0,00959  | -0,04022 | 0,431 | 0,551 | 1 |
| Wfikkn1    | 0,009603 | 0,02409  | 0,024 | 0,004 | 1 |
| Noc3l      | 0,009656 | -0,0426  | 0,158 | 0,226 | 1 |
| Ppat       | 0,009658 | -0,04412 | 0,161 | 0,232 | 1 |
| Cdk8       | 0,009694 | -0,03555 | 0,169 | 0,241 | 1 |
| Zfp93      | 0,0097   | -0,02805 | 0,046 | 0,086 | 1 |
| Tm9sf3     | 0,009761 | 0,092785 | 0,971 | 0,958 | 1 |
| Asph       | 0,009806 | -0,03    | 0,083 | 0,135 | 1 |
| Gtf2ird2   | 0,009816 | -0,02835 | 0,037 | 0,074 | 1 |
| Lactb2     | 0,009837 | -0,05439 | 0,202 | 0,272 | 1 |

|          |          |          |       |       |   |
|----------|----------|----------|-------|-------|---|
| Rad23b   | 0,009841 | 0,115198 | 0,58  | 0,551 | 1 |
| Gpr108   | 0,009854 | -0,04591 | 0,376 | 0,483 | 1 |
| Gm31812  | 0,009868 | -0,02473 | 0,013 | 0,038 | 1 |
| Tmem120k | 0,009871 | -0,02835 | 0,116 | 0,175 | 1 |
| Llgl1    | 0,009874 | -0,06389 | 0,661 | 0,776 | 1 |
| Fkbp4    | 0,009875 | -0,08053 | 0,771 | 0,829 | 1 |
| D930016D | 0,009882 | -0,0494  | 0,161 | 0,228 | 1 |
| Shroom3  | 0,009887 | -0,03507 | 0,128 | 0,192 | 1 |
| Bach2    | 0,009889 | -0,05202 | 0,152 | 0,217 | 1 |
| Pdzd8    | 0,009903 | -0,04491 | 0,422 | 0,532 | 1 |
| Cask     | 0,009905 | -0,044   | 0,244 | 0,325 | 1 |
| Aspdh    | 0,009907 | 0,028114 | 0,042 | 0,015 | 1 |
| Iqcb1    | 0,009943 | -0,04248 | 0,178 | 0,251 | 1 |
| Nabp1    | 0,009947 | 0,108494 | 0,125 | 0,078 | 1 |
| Ppil4    | 0,009949 | -0,03918 | 0,347 | 0,445 | 1 |
| Gm48371  | 0,009949 | -0,02202 | 0,009 | 0,032 | 1 |
| Gtpbp2   | 0,009954 | -0,03215 | 0,317 | 0,42  | 1 |
| Neu1     | 0,00996  | -0,03033 | 0,365 | 0,477 | 1 |
| Sdccag8  | 0,00997  | -0,04868 | 0,193 | 0,266 | 1 |
| 1600002K | 0,009977 | -0,04276 | 0,081 | 0,131 | 1 |
| Mrpl39   | 0,009984 | -0,05216 | 0,191 | 0,262 | 1 |
| Shroom2  | 0,010008 | 0,14397  | 0,596 | 0,572 | 1 |
| Nvl      | 0,010038 | -0,04902 | 0,301 | 0,392 | 1 |
| Atxn2l   | 0,010049 | 0,125756 | 0,62  | 0,586 | 1 |
| Pisd     | 0,010072 | -0,04584 | 0,301 | 0,397 | 1 |
| Aimp2    | 0,010089 | -0,04645 | 0,253 | 0,335 | 1 |
| Ears2    | 0,010095 | -0,03325 | 0,048 | 0,089 | 1 |
| Crebbp   | 0,010098 | 0,124922 | 0,635 | 0,591 | 1 |
| AU022252 | 0,010112 | -0,05419 | 0,176 | 0,245 | 1 |
| Pik3cb   | 0,010114 | -0,04457 | 0,165 | 0,234 | 1 |
| Ppcs     | 0,010114 | -0,03922 | 0,051 | 0,093 | 1 |
| Abhd17c  | 0,010119 | -0,05852 | 0,167 | 0,232 | 1 |
| Mklin1os | 0,010127 | -0,01928 | 0,004 | 0,021 | 1 |
| Man1c1   | 0,010132 | -0,03497 | 0,077 | 0,127 | 1 |
| S1pr2    | 0,010132 | 0,05505  | 0,092 | 0,051 | 1 |
| Zfp526   | 0,010157 | -0,02089 | 0,013 | 0,038 | 1 |
| Gm8013   | 0,010157 | -0,01909 | 0,013 | 0,038 | 1 |
| Wfdc3    | 0,01016  | -0,01721 | 0,004 | 0,021 | 1 |
| Nhsl2    | 0,01016  | -0,01721 | 0,004 | 0,021 | 1 |
| Gm39129  | 0,01016  | -0,01721 | 0,004 | 0,021 | 1 |
| Atp8a2   | 0,01016  | -0,01721 | 0,004 | 0,021 | 1 |
| Tsn      | 0,010179 | -0,08087 | 0,813 | 0,876 | 1 |
| Dock4    | 0,010186 | -0,03447 | 0,352 | 0,462 | 1 |
| Hmces    | 0,010195 | -0,03892 | 0,138 | 0,2   | 1 |
| Mfn2     | 0,010199 | -0,05478 | 0,266 | 0,348 | 1 |
| Suds3    | 0,010214 | -0,0429  | 0,328 | 0,426 | 1 |
| Ddah2    | 0,01022  | 0,147775 | 0,42  | 0,365 | 1 |
| Rps25    | 0,010241 | -0,0206  | 0,982 | 0,992 | 1 |
| Gm47469  | 0,010265 | -0,03004 | 0,024 | 0,055 | 1 |
| Syn2     | 0,010279 | -0,01951 | 0,004 | 0,021 | 1 |
| Ogfod2   | 0,010327 | -0,03306 | 0,174 | 0,245 | 1 |
| AC174678 | 0,010329 | -0,01356 | 0,004 | 0,021 | 1 |

|          |          |          |       |       |   |
|----------|----------|----------|-------|-------|---|
| Ankrd24  | 0,01033  | -0,0556  | 0,171 | 0,236 | 1 |
| Phkb     | 0,010347 | -0,07242 | 0,255 | 0,335 | 1 |
| Ift74    | 0,010354 | -0,0534  | 0,15  | 0,215 | 1 |
| Nacc1    | 0,010394 | -0,05686 | 0,246 | 0,323 | 1 |
| Ep300    | 0,010423 | 0,145469 | 0,565 | 0,546 | 1 |
| Greb1l   | 0,010426 | 0,022626 | 0,028 | 0,006 | 1 |
| Ppwd1    | 0,010434 | -0,00973 | 0,294 | 0,395 | 1 |
| Abraxas2 | 0,010441 | -0,03422 | 0,218 | 0,297 | 1 |
| Wdtdc1   | 0,010452 | -0,05439 | 0,323 | 0,407 | 1 |
| Gbp3     | 0,010455 | 0,03995  | 0,031 | 0,008 | 1 |
| Tenm4    | 0,010483 | -0,05001 | 0,116 | 0,173 | 1 |
| Wwtr1    | 0,010484 | 0,03117  | 0,028 | 0,006 | 1 |
| Pbx2     | 0,01049  | -0,04569 | 0,211 | 0,289 | 1 |
| Irf7     | 0,010493 | 0,032601 | 0,035 | 0,011 | 1 |
| Gm47512  | 0,010497 | -0,02403 | 0,018 | 0,046 | 1 |
| Mamld1   | 0,010507 | 0,04344  | 0,031 | 0,008 | 1 |
| Adarb2   | 0,010509 | -0,01698 | 0,002 | 0,017 | 1 |
| Fam49a   | 0,010509 | -0,01698 | 0,002 | 0,017 | 1 |
| Fam227b  | 0,010528 | -0,0149  | 0,002 | 0,017 | 1 |
| Mmd      | 0,010528 | -0,0149  | 0,002 | 0,017 | 1 |
| Gm39473  | 0,010528 | -0,0149  | 0,002 | 0,017 | 1 |
| Capn12   | 0,010541 | -0,01478 | 0,009 | 0,032 | 1 |
| Gcc2     | 0,010543 | -0,07089 | 0,539 | 0,641 | 1 |
| Jmy      | 0,010545 | -0,05685 | 0,468 | 0,574 | 1 |
| Gm43674  | 0,010554 | 0,02908  | 0,035 | 0,011 | 1 |
| Trappc13 | 0,010583 | -0,04147 | 0,345 | 0,447 | 1 |
| Mbnl1    | 0,010586 | 0,125916 | 0,927 | 0,899 | 1 |
| Ctdsp2   | 0,010593 | 0,120662 | 0,661 | 0,633 | 1 |
| Cers4    | 0,010604 | 0,134796 | 0,303 | 0,238 | 1 |
| Rpl18    | 0,010606 | -0,02887 | 0,994 | 0,992 | 1 |
| Tmem63b  | 0,010639 | 0,109389 | 0,637 | 0,599 | 1 |
| Zfp266   | 0,010658 | -0,05632 | 0,528 | 0,633 | 1 |
| Tug1     | 0,010677 | -0,03354 | 0,462 | 0,605 | 1 |
| Sf3b1    | 0,010687 | 0,115116 | 0,93  | 0,918 | 1 |
| Fbxo47   | 0,010689 | -0,01307 | 0,002 | 0,017 | 1 |
| Ccdc137  | 0,010703 | -0,05498 | 0,141 | 0,203 | 1 |
| Armc1    | 0,010727 | -0,05171 | 0,607 | 0,743 | 1 |
| Sec61a2  | 0,010733 | -0,03592 | 0,499 | 0,627 | 1 |
| Zfp212   | 0,010743 | -0,04103 | 0,112 | 0,169 | 1 |
| Qars     | 0,010818 | -0,05221 | 0,294 | 0,382 | 1 |
| Zfp235   | 0,010843 | -0,0357  | 0,077 | 0,127 | 1 |
| Pitpnb   | 0,010858 | -0,03976 | 0,484 | 0,595 | 1 |
| Hist1h4d | 0,010871 | -0,04136 | 0,108 | 0,165 | 1 |
| Eif3a    | 0,010884 | 0,089399 | 0,939 | 0,918 | 1 |
| Dnajc11  | 0,010913 | -0,01134 | 0,288 | 0,39  | 1 |
| Bcor     | 0,010924 | 0,110251 | 0,275 | 0,217 | 1 |
| 31100430 | 0,010932 | -0,02625 | 0,136 | 0,2   | 1 |
| Foxk2    | 0,010943 | -0,03452 | 0,253 | 0,338 | 1 |
| Zdhhc23  | 0,010953 | -0,0491  | 0,057 | 0,099 | 1 |
| Slain1   | 0,010957 | 0,075505 | 1     | 0,998 | 1 |
| Ufsp1    | 0,010981 | -0,03403 | 0,066 | 0,112 | 1 |
| Eif3j2   | 0,010988 | -0,06022 | 0,2   | 0,27  | 1 |

|           |          |          |       |       |   |
|-----------|----------|----------|-------|-------|---|
| Spsb2     | 0,010996 | -0,04194 | 0,092 | 0,143 | 1 |
| Car13     | 0,011048 | -0,03501 | 0,033 | 0,068 | 1 |
| Gm31105   | 0,011048 | -0,03501 | 0,033 | 0,068 | 1 |
| Brwd3     | 0,011057 | -0,02566 | 0,167 | 0,238 | 1 |
| Ypel4     | 0,011073 | -0,04608 | 0,092 | 0,143 | 1 |
| Mtbp      | 0,011087 | -0,03403 | 0,051 | 0,093 | 1 |
| Cep120    | 0,011097 | -0,0477  | 0,371 | 0,466 | 1 |
| E130308A1 | 0,011102 | -0,03803 | 0,385 | 0,5   | 1 |
| Uba3      | 0,011179 | -0,03334 | 0,383 | 0,483 | 1 |
| Cwc27     | 0,011215 | -0,04156 | 0,246 | 0,327 | 1 |
| Matn2     | 0,011218 | -0,04306 | 0,158 | 0,226 | 1 |
| Ccnd3     | 0,011264 | -0,06771 | 0,239 | 0,312 | 1 |
| Ragef2    | 0,011269 | -0,04766 | 0,213 | 0,291 | 1 |
| Ggt1      | 0,011309 | -0,04234 | 0,044 | 0,082 | 1 |
| Swsap1    | 0,011324 | -0,03223 | 0,026 | 0,057 | 1 |
| Nufip1    | 0,011337 | -0,04596 | 0,149 | 0,213 | 1 |
| Gm14419   | 0,011344 | -0,03045 | 0,026 | 0,057 | 1 |
| Ier3      | 0,011389 | 0,064075 | 0,048 | 0,019 | 1 |
| Hspbp1    | 0,011409 | -0,02997 | 0,273 | 0,363 | 1 |
| Cox16     | 0,011464 | -0,04868 | 0,11  | 0,165 | 1 |
| Zfp318    | 0,011483 | -0,04742 | 0,261 | 0,342 | 1 |
| Tha1      | 0,011503 | -0,03167 | 0,033 | 0,068 | 1 |
| Plpbp     | 0,011508 | -0,0894  | 0,532 | 0,618 | 1 |
| Rev1      | 0,011567 | -0,03361 | 0,228 | 0,308 | 1 |
| Srrm1     | 0,011575 | 0,099832 | 0,947 | 0,939 | 1 |
| Ampd2     | 0,011576 | -0,0383  | 0,044 | 0,082 | 1 |
| Gtpbp10   | 0,011601 | -0,04011 | 0,088 | 0,139 | 1 |
| Ykt6      | 0,011613 | -0,05608 | 0,277 | 0,359 | 1 |
| Paox      | 0,011623 | -0,04194 | 0,09  | 0,141 | 1 |
| Rbm26     | 0,011633 | -0,04814 | 0,558 | 0,677 | 1 |
| Haus7     | 0,011633 | -0,02674 | 0,154 | 0,222 | 1 |
| Cgrrf1    | 0,011657 | -0,04293 | 0,183 | 0,253 | 1 |
| Ehd3      | 0,011694 | -0,03176 | 0,226 | 0,306 | 1 |
| Sult5a1   | 0,011765 | -0,03402 | 0,015 | 0,04  | 1 |
| Wdr48     | 0,011802 | -0,05198 | 0,305 | 0,388 | 1 |
| Las1l     | 0,011806 | -0,01883 | 0,356 | 0,473 | 1 |
| Kcnj10    | 0,011901 | -0,07451 | 0,972 | 0,981 | 1 |
| Rex1bd    | 0,011936 | -0,06112 | 0,749 | 0,84  | 1 |
| Hat1      | 0,011936 | -0,02737 | 0,237 | 0,321 | 1 |
| Kdm5a     | 0,011959 | 0,140562 | 0,626 | 0,616 | 1 |
| Peli2     | 0,011968 | -0,02282 | 0,339 | 0,454 | 1 |
| Picalm    | 0,011968 | -0,07195 | 0,934 | 0,956 | 1 |
| Prss41    | 0,01197  | -0,03121 | 0,015 | 0,04  | 1 |
| Map4k2    | 0,011978 | -0,05231 | 0,213 | 0,287 | 1 |
| Dnajb3    | 0,01198  | -0,02495 | 0,015 | 0,04  | 1 |
| Gm43242   | 0,011993 | -0,05345 | 0,106 | 0,16  | 1 |
| Ube2j2    | 0,011994 | -0,04415 | 0,402 | 0,5   | 1 |
| Slc1a3    | 0,011997 | -0,01179 | 0,45  | 0,576 | 1 |
| Ercc3     | 0,012031 | -0,04005 | 0,176 | 0,245 | 1 |
| Zfp365    | 0,012056 | -0,08556 | 0,56  | 0,652 | 1 |
| Mus81     | 0,012079 | -0,04332 | 0,125 | 0,184 | 1 |
| K230015Dl | 0,012084 | -0,02292 | 0,015 | 0,04  | 1 |

|          |          |          |       |       |   |
|----------|----------|----------|-------|-------|---|
| Galnt4   | 0,012106 | -0,04965 | 0,075 | 0,122 | 1 |
| Eif4g3   | 0,012109 | -0,10841 | 0,571 | 0,624 | 1 |
| Med11    | 0,012113 | -0,03276 | 0,101 | 0,156 | 1 |
| Plekhm3  | 0,012122 | -0,05932 | 0,295 | 0,371 | 1 |
| Gm13483  | 0,01214  | -0,03617 | 0,046 | 0,084 | 1 |
| Dcp2     | 0,012141 | -0,04922 | 0,117 | 0,173 | 1 |
| Slc26a11 | 0,012149 | -0,0438  | 0,139 | 0,2   | 1 |
| Lrrc14   | 0,012191 | -0,0373  | 0,15  | 0,215 | 1 |
| Chd7     | 0,012197 | 0,14724  | 0,701 | 0,694 | 1 |
| Tmem201  | 0,012228 | -0,03684 | 0,18  | 0,253 | 1 |
| Comtd1   | 0,012235 | -0,05001 | 0,191 | 0,259 | 1 |
| Slc41a1  | 0,01225  | -0,01891 | 0,136 | 0,2   | 1 |
| Hmgxb3   | 0,012253 | -0,0617  | 0,123 | 0,177 | 1 |
| Nfatc2ip | 0,012271 | -0,04595 | 0,081 | 0,129 | 1 |
| Rasl11a  | 0,012307 | 0,026828 | 0,018 | 0,002 | 1 |
| Ubxn6    | 0,012316 | -0,05734 | 0,613 | 0,713 | 1 |
| Dnajc16  | 0,012321 | -0,05049 | 0,169 | 0,234 | 1 |
| Tmc7     | 0,012322 | -0,00498 | 0,273 | 0,376 | 1 |
| Ssb      | 0,012359 | -0,06501 | 0,793 | 0,842 | 1 |
| Lmo7     | 0,012361 | -0,03678 | 0,028 | 0,059 | 1 |
| Sfn      | 0,012369 | 0,019672 | 0,018 | 0,002 | 1 |
| Gm45353  | 0,012369 | 0,019672 | 0,018 | 0,002 | 1 |
| BC030499 | 0,012389 | 0,019672 | 0,018 | 0,002 | 1 |
| Dis3l    | 0,012397 | -0,03676 | 0,161 | 0,228 | 1 |
| Gabarap  | 0,012411 | -0,02799 | 0,996 | 0,994 | 1 |
| Dtnbp1   | 0,01244  | -0,04308 | 0,189 | 0,259 | 1 |
| Mfsd14b  | 0,012446 | -0,04678 | 0,499 | 0,599 | 1 |
| Fam57a   | 0,012477 | -0,03233 | 0,382 | 0,489 | 1 |
| Dtx3l    | 0,012488 | 0,061467 | 0,044 | 0,017 | 1 |
| 2310016G | 0,0125   | -0,01776 | 0,015 | 0,04  | 1 |
| Cactin   | 0,012505 | -0,03852 | 0,143 | 0,207 | 1 |
| Eef1b2   | 0,012515 | -0,04489 | 0,923 | 0,937 | 1 |
| Pros1    | 0,012557 | 0,09288  | 0,209 | 0,152 | 1 |
| Cdh1     | 0,012558 | 0,03995  | 0,018 | 0,002 | 1 |
| Fgf12    | 0,012576 | -0,0406  | 0,048 | 0,086 | 1 |
| Myrip    | 0,012577 | 0,083565 | 0,178 | 0,124 | 1 |
| 4930572G | 0,012584 | -0,02554 | 0,026 | 0,057 | 1 |
| Kcp      | 0,012584 | -0,01974 | 0,007 | 0,027 | 1 |
| Aldh3b2  | 0,012584 | -0,01974 | 0,007 | 0,027 | 1 |
| Nt5c     | 0,012601 | -0,06822 | 0,283 | 0,354 | 1 |
| Thrb     | 0,01262  | -0,02632 | 0,007 | 0,027 | 1 |
| Glt28d2  | 0,012621 | 0,019055 | 0,018 | 0,002 | 1 |
| Gm10827  | 0,012631 | -0,05179 | 0,046 | 0,084 | 1 |
| Gm38414  | 0,012637 | -0,02157 | 0,015 | 0,04  | 1 |
| Vps50    | 0,012643 | -0,03969 | 0,352 | 0,447 | 1 |
| Iars     | 0,012647 | -0,04985 | 0,514 | 0,637 | 1 |
| Mfap3    | 0,012652 | -0,04983 | 0,174 | 0,241 | 1 |
| Tnrc18   | 0,012658 | -0,03552 | 0,27  | 0,359 | 1 |
| Zfp68    | 0,012678 | -0,02341 | 0,29  | 0,388 | 1 |
| Mettl13  | 0,012693 | -0,03791 | 0,121 | 0,179 | 1 |
| Toe1     | 0,012698 | -0,03663 | 0,15  | 0,215 | 1 |
| Mtg2     | 0,012735 | -0,05607 | 0,213 | 0,285 | 1 |

|          |          |          |       |       |   |
|----------|----------|----------|-------|-------|---|
| Tlk2     | 0,012739 | -0,05716 | 0,336 | 0,42  | 1 |
| Pan2     | 0,012781 | -0,03796 | 0,149 | 0,213 | 1 |
| Cavin2   | 0,012803 | -0,03574 | 0,193 | 0,266 | 1 |
| Megf11   | 0,012808 | -0,01792 | 0,007 | 0,027 | 1 |
| Commd7   | 0,012811 | -0,05257 | 0,36  | 0,449 | 1 |
| Trim41   | 0,012825 | -0,03311 | 0,209 | 0,289 | 1 |
| BC005624 | 0,012835 | -0,06608 | 0,679 | 0,774 | 1 |
| Tyw1     | 0,012843 | -0,05231 | 0,237 | 0,314 | 1 |
| Sart1    | 0,012851 | -0,05132 | 0,328 | 0,416 | 1 |
| Otud4    | 0,012852 | 0,120015 | 0,391 | 0,342 | 1 |
| Gpr155   | 0,012854 | 0,108432 | 0,664 | 0,62  | 1 |
| Slc39a3  | 0,012908 | -0,0298  | 0,433 | 0,559 | 1 |
| 11100020 | 0,012922 | -0,02247 | 0,011 | 0,034 | 1 |
| Rbm6     | 0,012923 | 0,122237 | 0,543 | 0,504 | 1 |
| Tnfrsf19 | 0,012932 | -0,01322 | 0,007 | 0,027 | 1 |
| Smtn     | 0,012932 | 0,081246 | 0,106 | 0,063 | 1 |
| Arhgef18 | 0,01296  | -0,03899 | 0,119 | 0,177 | 1 |
| Wdr54    | 0,012962 | -0,03838 | 0,097 | 0,15  | 1 |
| Slc15a4  | 0,012976 | 0,14062  | 0,683 | 0,686 | 1 |
| Glcci1   | 0,012992 | -0,03916 | 0,123 | 0,181 | 1 |
| Sdr39u1  | 0,013003 | -0,03517 | 0,057 | 0,099 | 1 |
| Dcakd    | 0,013013 | -0,04442 | 0,138 | 0,198 | 1 |
| Eif3j1   | 0,013032 | 0,115334 | 0,783 | 0,743 | 1 |
| Tpi1     | 0,013039 | 0,134694 | 0,622 | 0,599 | 1 |
| Ctr9     | 0,013064 | -0,04557 | 0,583 | 0,703 | 1 |
| Tox      | 0,013096 | -0,03617 | 0,037 | 0,072 | 1 |
| Acsl3    | 0,013119 | 0,19798  | 0,765 | 0,732 | 1 |
| Gm14403  | 0,013142 | -0,03932 | 0,059 | 0,101 | 1 |
| Col27a1  | 0,013156 | 0,102925 | 0,136 | 0,089 | 1 |
| Ttc4     | 0,013176 | -0,01724 | 0,323 | 0,43  | 1 |
| Znrf1    | 0,013186 | -0,05245 | 0,297 | 0,388 | 1 |
| Dcaf12   | 0,013193 | -0,03493 | 0,284 | 0,376 | 1 |
| Glg1     | 0,013227 | 0,106734 | 0,802 | 0,789 | 1 |
| 4932438A | 0,013237 | 0,137603 | 0,697 | 0,669 | 1 |
| Cpq      | 0,013244 | -0,03834 | 0,061 | 0,103 | 1 |
| Mgat2    | 0,01326  | -0,02114 | 0,262 | 0,352 | 1 |
| Akip1    | 0,01326  | -0,0375  | 0,094 | 0,146 | 1 |
| Gm11423  | 0,013281 | -0,02421 | 0,035 | 0,07  | 1 |
| Usf1     | 0,013318 | -0,05495 | 0,327 | 0,416 | 1 |
| 4930481A | 0,013329 | -0,02089 | 0,011 | 0,034 | 1 |
| Mosmo    | 0,01336  | -0,0387  | 0,367 | 0,468 | 1 |
| D5Ert615 | 0,013362 | 0,012762 | 0,013 | 0     | 1 |
| Tbc1d1   | 0,013363 | 0,021779 | 0,013 | 0     | 1 |
| BC049987 | 0,013363 | 0,019982 | 0,013 | 0     | 1 |
| Itga2    | 0,013363 | 0,019982 | 0,013 | 0     | 1 |
| Irx3     | 0,013363 | 0,025364 | 0,013 | 0     | 1 |
| Fam117a  | 0,013369 | -0,03924 | 0,097 | 0,15  | 1 |
| Snx11    | 0,013373 | -0,01739 | 0,239 | 0,323 | 1 |
| Zdhhc2   | 0,013429 | 0,040035 | 0,062 | 0,03  | 1 |
| Cul9     | 0,013464 | -0,07652 | 0,237 | 0,304 | 1 |
| Arfgef2  | 0,013494 | -0,05005 | 0,327 | 0,407 | 1 |
| Zbtb6    | 0,013552 | -0,03185 | 0,211 | 0,287 | 1 |

|           |          |          |       |       |   |
|-----------|----------|----------|-------|-------|---|
| Ppp2r1b   | 0,013563 | -0,04475 | 0,117 | 0,173 | 1 |
| Agpat3    | 0,013614 | -0,05709 | 0,875 | 0,892 | 1 |
| Ccdc107   | 0,013637 | -0,05212 | 0,101 | 0,152 | 1 |
| Srbd1     | 0,013639 | -0,03882 | 0,202 | 0,274 | 1 |
| Dusp11    | 0,013641 | 0,102264 | 0,747 | 0,732 | 1 |
| Dennd5b   | 0,013654 | -0,04247 | 0,472 | 0,595 | 1 |
| Bud31     | 0,013685 | -0,0375  | 0,484 | 0,61  | 1 |
| Gm15991   | 0,013698 | -0,01525 | 0,011 | 0,034 | 1 |
| Utp20     | 0,01372  | -0,0378  | 0,105 | 0,158 | 1 |
| AC122413. | 0,013739 | -0,02899 | 0,017 | 0,042 | 1 |
| Mnat1     | 0,013744 | -0,06547 | 0,268 | 0,342 | 1 |
| Dis3l2    | 0,013768 | -0,04219 | 0,33  | 0,428 | 1 |
| Uchl1     | 0,013791 | -0,1893  | 0,321 | 0,395 | 1 |
| Dhodh     | 0,013817 | -0,03544 | 0,138 | 0,198 | 1 |
| Wdr89     | 0,013828 | -0,0438  | 0,152 | 0,215 | 1 |
| Gtpbp8    | 0,013848 | -0,0562  | 0,125 | 0,179 | 1 |
| Rdx       | 0,01386  | 0,100325 | 1     | 0,996 | 1 |
| Sap18     | 0,013872 | -0,05155 | 0,668 | 0,745 | 1 |
| Fzd8      | 0,013876 | 0,055763 | 0,073 | 0,038 | 1 |
| Ddx56     | 0,013896 | -0,02365 | 0,25  | 0,333 | 1 |
| Rassf3    | 0,013897 | 0,071084 | 0,128 | 0,082 | 1 |
| Eno3      | 0,013901 | 0,036847 | 0,04  | 0,015 | 1 |
| Ice2      | 0,013926 | -0,0462  | 0,169 | 0,236 | 1 |
| Cln8      | 0,013926 | -0,04989 | 0,593 | 0,719 | 1 |
| Pls3      | 0,013928 | -0,01421 | 0,426 | 0,559 | 1 |
| Hexb      | 0,013963 | -0,03155 | 0,303 | 0,39  | 1 |
| Ippk      | 0,01399  | -0,03485 | 0,38  | 0,481 | 1 |
| Banf1     | 0,014023 | -0,02354 | 0,426 | 0,542 | 1 |
| Zfp120    | 0,014039 | -0,03667 | 0,119 | 0,177 | 1 |
| Zfp983    | 0,014044 | -0,03518 | 0,05  | 0,089 | 1 |
| Abca3     | 0,014072 | -0,03406 | 0,224 | 0,302 | 1 |
| Eif2b5    | 0,014073 | -0,05036 | 0,321 | 0,405 | 1 |
| Dph5      | 0,014109 | -0,04297 | 0,211 | 0,281 | 1 |
| Ldlrap1   | 0,014122 | -0,07902 | 0,345 | 0,432 | 1 |
| Ranbp6    | 0,014138 | -0,04257 | 0,15  | 0,213 | 1 |
| Zc3h15    | 0,01415  | -0,05423 | 0,661 | 0,749 | 1 |
| Tnip1     | 0,014159 | -0,04608 | 0,244 | 0,321 | 1 |
| Nprl2     | 0,014164 | -0,04412 | 0,202 | 0,272 | 1 |
| Atg10     | 0,014166 | -0,04488 | 0,156 | 0,217 | 1 |
| Hnrnpd    | 0,014171 | 0,12214  | 0,717 | 0,709 | 1 |
| Umad1     | 0,014177 | -0,05085 | 0,141 | 0,2   | 1 |
| Poli      | 0,014196 | -0,02835 | 0,037 | 0,072 | 1 |
| Fam81a    | 0,014198 | 0,026676 | 0,04  | 0,015 | 1 |
| Gtf3c5    | 0,014199 | -0,04911 | 0,167 | 0,232 | 1 |
| Lsm10     | 0,014211 | -0,0476  | 0,178 | 0,243 | 1 |
| Efr3a     | 0,014222 | -0,04629 | 0,261 | 0,342 | 1 |
| Dcun1d3   | 0,014234 | -0,03184 | 0,149 | 0,213 | 1 |
| Alkbh8    | 0,014238 | -0,04582 | 0,255 | 0,335 | 1 |
| Nans      | 0,014269 | -0,04696 | 0,18  | 0,247 | 1 |
| Zfp775    | 0,014273 | -0,0456  | 0,094 | 0,143 | 1 |
| Gramd1c   | 0,014286 | -0,02315 | 0,017 | 0,042 | 1 |
| Slc39a14  | 0,014288 | 0,112119 | 0,235 | 0,179 | 1 |



|           |          |          |       |       |   |
|-----------|----------|----------|-------|-------|---|
| Gm29083   | 0,01429  | -0,03659 | 0,031 | 0,063 | 1 |
| Hif1a     | 0,014328 | 0,115682 | 0,545 | 0,513 | 1 |
| Apbb1ip   | 0,01434  | -0,04304 | 0,139 | 0,2   | 1 |
| Nnt       | 0,014349 | -0,02359 | 0,017 | 0,042 | 1 |
| Ankrd12   | 0,014465 | 0,117709 | 0,89  | 0,859 | 1 |
| Dbi       | 0,014478 | -0,05233 | 1     | 0,998 | 1 |
| Rps21     | 0,014483 | -0,04013 | 1     | 0,998 | 1 |
| Siah2     | 0,014493 | -0,04574 | 0,327 | 0,418 | 1 |
| Trim26    | 0,014509 | -0,05486 | 0,281 | 0,359 | 1 |
| Grb2      | 0,014536 | -0,056   | 0,708 | 0,776 | 1 |
| Erc1      | 0,014591 | -0,03167 | 0,251 | 0,333 | 1 |
| Dus3l     | 0,014593 | -0,05466 | 0,273 | 0,35  | 1 |
| Dnttip1   | 0,014595 | -0,04335 | 0,295 | 0,382 | 1 |
| Zfp647    | 0,014596 | -0,02224 | 0,022 | 0,051 | 1 |
| Abhd10    | 0,014597 | -0,04861 | 0,161 | 0,224 | 1 |
| Lrtm2     | 0,014606 | 0,037521 | 0,037 | 0,013 | 1 |
| Parp4     | 0,014631 | -0,03685 | 0,229 | 0,306 | 1 |
| Cacna2d4  | 0,014631 | 0,082768 | 0,081 | 0,044 | 1 |
| Acox3     | 0,014659 | 0,107712 | 0,242 | 0,184 | 1 |
| Tnfrsf13c | 0,014672 | -0,03403 | 0,064 | 0,108 | 1 |
| Wwc2      | 0,014717 | 0,151224 | 0,323 | 0,274 | 1 |
| Rpl10     | 0,014728 | -0,01508 | 0,982 | 0,981 | 1 |
| Hexa      | 0,014763 | 0,102167 | 0,651 | 0,62  | 1 |
| Fbxo34    | 0,014769 | -0,03625 | 0,086 | 0,135 | 1 |
| Samd9l    | 0,014795 | 0,032272 | 0,037 | 0,013 | 1 |
| Man2b2    | 0,014806 | -0,03295 | 0,101 | 0,154 | 1 |
| Rc3hb2    | 0,01484  | -0,03383 | 0,051 | 0,091 | 1 |
| 1700019L1 | 0,014857 | 0,039639 | 0,05  | 0,021 | 1 |
| Ddx19b    | 0,014883 | -0,04359 | 0,075 | 0,12  | 1 |
| Aldh1b1   | 0,014891 | 0,032272 | 0,037 | 0,013 | 1 |
| Iws1      | 0,014902 | -0,02678 | 0,394 | 0,5   | 1 |
| Asb13     | 0,014938 | -0,03647 | 0,066 | 0,11  | 1 |
| Grwd1     | 0,014946 | -0,04235 | 0,123 | 0,179 | 1 |
| Rars      | 0,014947 | -0,04471 | 0,185 | 0,253 | 1 |
| Stip1     | 0,014974 | -0,04526 | 0,587 | 0,686 | 1 |
| Finc      | 0,014979 | 0,097551 | 0,176 | 0,122 | 1 |
| Brsk1     | 0,014984 | -0,04371 | 0,229 | 0,304 | 1 |
| Zfp710    | 0,014996 | -0,05386 | 0,134 | 0,192 | 1 |
| Nbeal1    | 0,015008 | 0,110799 | 0,6   | 0,563 | 1 |
| Nr2c1     | 0,015013 | -0,05425 | 0,163 | 0,224 | 1 |
| Hmgb2     | 0,015014 | -0,03493 | 0,101 | 0,154 | 1 |
| Vps26a    | 0,015024 | -0,03897 | 0,42  | 0,53  | 1 |
| Ddb2      | 0,015083 | -0,03365 | 0,066 | 0,11  | 1 |
| Gm3448    | 0,015085 | -0,01059 | 0,099 | 0,152 | 1 |
| Natd1     | 0,015086 | -0,0481  | 0,158 | 0,219 | 1 |
| Gatc      | 0,015122 | -0,04124 | 0,165 | 0,232 | 1 |
| Satb1     | 0,015123 | -0,04262 | 0,092 | 0,141 | 1 |
| E130311K1 | 0,015189 | -0,0395  | 0,07  | 0,114 | 1 |
| Il11      | 0,015208 | -0,03092 | 0,04  | 0,076 | 1 |
| Gm17259   | 0,015212 | -0,02886 | 0,05  | 0,089 | 1 |
| Col9a3    | 0,015249 | -0,05267 | 0,376 | 0,468 | 1 |
| Adck2     | 0,015268 | -0,05257 | 0,149 | 0,207 | 1 |

|           |          |          |       |       |   |
|-----------|----------|----------|-------|-------|---|
| Cdkl2     | 0,015289 | 0,096618 | 0,193 | 0,141 | 1 |
| Zfp644    | 0,015328 | 0,13299  | 0,71  | 0,709 | 1 |
| Gm26916   | 0,015329 | 0,051749 | 0,033 | 0,011 | 1 |
| Slc19a1   | 0,015368 | -0,03171 | 0,051 | 0,091 | 1 |
| Zcchc6    | 0,015437 | 0,129168 | 0,541 | 0,519 | 1 |
| Ano8      | 0,015458 | -0,05613 | 0,141 | 0,198 | 1 |
| Timp4     | 0,01547  | -0,01951 | 0,006 | 0,023 | 1 |
| A730017C  | 0,01547  | -0,01951 | 0,006 | 0,023 | 1 |
| Atg12     | 0,015488 | -0,03151 | 0,288 | 0,373 | 1 |
| Apmap     | 0,015502 | -0,029   | 0,257 | 0,344 | 1 |
| Igsf9b    | 0,015519 | 0,11348  | 0,228 | 0,173 | 1 |
| Gna13     | 0,015528 | 0,16063  | 0,417 | 0,38  | 1 |
| Tspan12   | 0,015537 | -0,01745 | 0,006 | 0,023 | 1 |
| Nek11     | 0,015537 | -0,01745 | 0,006 | 0,023 | 1 |
| Krt28     | 0,015537 | -0,01745 | 0,006 | 0,023 | 1 |
| Hnrnpa2b1 | 0,015546 | 0,077037 | 0,998 | 0,998 | 1 |
| Gm15893   | 0,015592 | 0,032601 | 0,033 | 0,011 | 1 |
| Mpi       | 0,015594 | -0,03697 | 0,09  | 0,139 | 1 |
| Pygb      | 0,015604 | -0,04129 | 0,182 | 0,249 | 1 |
| Ino80dos  | 0,015669 | -0,02119 | 0,097 | 0,15  | 1 |
| Micall2   | 0,01567  | 0,039671 | 0,064 | 0,032 | 1 |
| Kbtbd4    | 0,015715 | -0,03643 | 0,088 | 0,137 | 1 |
| A430105JC | 0,01572  | -0,01769 | 0,006 | 0,023 | 1 |
| B630019K  | 0,015725 | -0,05605 | 0,09  | 0,137 | 1 |
| Nek4      | 0,015727 | -0,023   | 0,215 | 0,293 | 1 |
| Lrprrc    | 0,015743 | -0,04356 | 0,36  | 0,451 | 1 |
| Spice1    | 0,015749 | -0,03839 | 0,165 | 0,232 | 1 |
| Spata2    | 0,015779 | -0,03855 | 0,422 | 0,538 | 1 |
| Eri1      | 0,015779 | -0,05457 | 0,24  | 0,316 | 1 |
| Adam17    | 0,015806 | -0,0393  | 0,33  | 0,43  | 1 |
| Mettl5    | 0,015839 | -0,04326 | 0,213 | 0,285 | 1 |
| Tapbpl    | 0,015853 | -0,01805 | 0,029 | 0,061 | 1 |
| Gtf3c4    | 0,015861 | -0,0421  | 0,149 | 0,209 | 1 |
| Cdkn2a    | 0,015863 | 0,027959 | 0,026 | 0,006 | 1 |
| Zfp846    | 0,015888 | -0,04104 | 0,174 | 0,241 | 1 |
| Gm3604    | 0,015895 | -0,0227  | 0,013 | 0,036 | 1 |
| Btbd9     | 0,015912 | -0,0408  | 0,336 | 0,42  | 1 |
| Tuba4a    | 0,015928 | 0,05987  | 0,123 | 0,078 | 1 |
| Cldn10    | 0,015974 | -0,01587 | 0,006 | 0,023 | 1 |
| C2cd4c    | 0,015988 | 0,024407 | 0,026 | 0,006 | 1 |
| Fam46a    | 0,016007 | -0,04941 | 0,233 | 0,306 | 1 |
| Ctsz      | 0,016086 | -0,05671 | 0,712 | 0,795 | 1 |
| Atp11a    | 0,016091 | 0,124878 | 0,848 | 0,81  | 1 |
| Eid3      | 0,016104 | 0,034691 | 0,029 | 0,008 | 1 |
| Taco1     | 0,016106 | -0,03247 | 0,042 | 0,078 | 1 |
| Ddx58     | 0,01611  | 0,051829 | 0,07  | 0,036 | 1 |
| Vti1a     | 0,016121 | -0,02361 | 0,27  | 0,357 | 1 |
| Cep128    | 0,016121 | -0,04477 | 0,081 | 0,127 | 1 |
| 6330418K  | 0,016136 | -0,02447 | 0,024 | 0,053 | 1 |
| Pold2     | 0,016138 | -0,03673 | 0,224 | 0,297 | 1 |
| Rab6a     | 0,016173 | -0,03789 | 0,954 | 0,958 | 1 |
| Mex3a     | 0,01618  | 0,034691 | 0,026 | 0,006 | 1 |

|          |          |          |       |       |   |
|----------|----------|----------|-------|-------|---|
| Arhgef7  | 0,016218 | 0,076548 | 0,239 | 0,179 | 1 |
| Mrpl47   | 0,016237 | -0,05139 | 0,114 | 0,167 | 1 |
| Oser1    | 0,016249 | -0,02692 | 0,459 | 0,574 | 1 |
| Atp6v1d  | 0,016273 | -0,05177 | 0,585 | 0,688 | 1 |
| Ddx41    | 0,016285 | -0,03864 | 0,191 | 0,259 | 1 |
| Synpr    | 0,016326 | -0,03442 | 0,018 | 0,044 | 1 |
| Pfkfb1   | 0,016326 | -0,01049 | 0     | 0,011 | 1 |
| Gm30173  | 0,016326 | -0,01049 | 0     | 0,011 | 1 |
| Etnppl   | 0,016326 | -0,01049 | 0     | 0,011 | 1 |
| Gm43689  | 0,016326 | -0,01049 | 0     | 0,011 | 1 |
| Glipr2   | 0,016326 | -0,01049 | 0     | 0,011 | 1 |
| 2900089D | 0,016326 | -0,01049 | 0     | 0,011 | 1 |
| Gm20387  | 0,016326 | -0,01049 | 0     | 0,011 | 1 |
| Ntn5     | 0,016326 | -0,01049 | 0     | 0,011 | 1 |
| Asb5     | 0,016326 | -0,01049 | 0     | 0,011 | 1 |
| Nwd1     | 0,016326 | -0,01049 | 0     | 0,011 | 1 |
| Gm16573  | 0,016326 | -0,01049 | 0     | 0,011 | 1 |
| Camkv    | 0,016326 | -0,01049 | 0     | 0,011 | 1 |
| Tmie     | 0,016326 | -0,01049 | 0     | 0,011 | 1 |
| Tdgf1    | 0,016326 | -0,01049 | 0     | 0,011 | 1 |
| Rasl10b  | 0,016326 | -0,01049 | 0     | 0,011 | 1 |
| Gm11437  | 0,016326 | -0,01049 | 0     | 0,011 | 1 |
| Rbfox3   | 0,016326 | -0,01049 | 0     | 0,011 | 1 |
| Gm5678   | 0,016326 | -0,01049 | 0     | 0,011 | 1 |
| Pcdhga1  | 0,016326 | -0,01049 | 0     | 0,011 | 1 |
| Nudt8    | 0,016326 | -0,01049 | 0     | 0,011 | 1 |
| Cit      | 0,016326 | -0,01258 | 0     | 0,011 | 1 |
| Gm15915  | 0,016326 | -0,01258 | 0     | 0,011 | 1 |
| 2900052N | 0,016326 | -0,01258 | 0     | 0,011 | 1 |
| Bex1     | 0,016326 | -0,01466 | 0     | 0,011 | 1 |
| Gm16233  | 0,016327 | -0,01881 | 0     | 0,011 | 1 |
| Zfp871   | 0,016338 | -0,02666 | 0,372 | 0,483 | 1 |
| Ppp2r5b  | 0,016396 | -0,05762 | 0,506 | 0,605 | 1 |
| Pxdn     | 0,016501 | -0,03386 | 0,103 | 0,156 | 1 |
| Eftud2   | 0,016502 | -0,01788 | 0,272 | 0,361 | 1 |
| Ranbp17  | 0,016517 | -0,02202 | 0,009 | 0,03  | 1 |
| Pld6     | 0,016517 | -0,02202 | 0,009 | 0,03  | 1 |
| Mettl1   | 0,016559 | -0,01004 | 0,231 | 0,312 | 1 |
| Lgi3     | 0,016565 | 0,11387  | 0,938 | 0,907 | 1 |
| Ccdc18   | 0,016581 | -0,02451 | 0,009 | 0,03  | 1 |
| A930017K | 0,016588 | 0,077899 | 0,145 | 0,097 | 1 |
| Blzf1    | 0,016609 | -0,03214 | 0,202 | 0,274 | 1 |
| Chml     | 0,01663  | 0,057897 | 0,11  | 0,068 | 1 |
| Ppm1h    | 0,016676 | -0,03404 | 0,13  | 0,188 | 1 |
| Zfp383   | 0,016721 | -0,0427  | 0,138 | 0,196 | 1 |
| Orai3    | 0,016774 | -0,04001 | 0,106 | 0,158 | 1 |
| A1597479 | 0,016778 | -0,05314 | 0,149 | 0,207 | 1 |
| Gm34006  | 0,016796 | 0,033034 | 0,046 | 0,019 | 1 |
| Eif2ak1  | 0,016802 | -0,02646 | 0,292 | 0,382 | 1 |
| Pthr1    | 0,016807 | -0,02021 | 0,009 | 0,03  | 1 |
| Slc5a3   | 0,016811 | 0,156478 | 0,602 | 0,563 | 1 |
| lqck     | 0,016828 | -0,01839 | 0,009 | 0,03  | 1 |

|           |          |          |       |       |   |
|-----------|----------|----------|-------|-------|---|
| Ppp3cc    | 0,016849 | -0,03258 | 0,189 | 0,259 | 1 |
| Crlf3     | 0,01689  | -0,05608 | 0,235 | 0,304 | 1 |
| Eif6      | 0,016922 | -0,05884 | 0,727 | 0,802 | 1 |
| Bzw1      | 0,016981 | -0,04213 | 0,917 | 0,945 | 1 |
| Gas6      | 0,016985 | 0,062681 | 0,284 | 0,222 | 1 |
| Trappc5   | 0,016989 | -0,06839 | 0,483 | 0,568 | 1 |
| Rom1      | 0,017009 | -0,03598 | 0,128 | 0,186 | 1 |
| Psmc4     | 0,017035 | -0,04873 | 0,628 | 0,715 | 1 |
| Dcc       | 0,017045 | -0,02825 | 0,026 | 0,055 | 1 |
| Tra2a     | 0,01707  | 0,100392 | 0,932 | 0,916 | 1 |
| Xpo5      | 0,01709  | -0,03651 | 0,059 | 0,099 | 1 |
| 2810457G  | 0,017219 | -0,01978 | 0,018 | 0,044 | 1 |
| Hgh1      | 0,017268 | -0,02421 | 0,033 | 0,065 | 1 |
| Dlgap4    | 0,017308 | -0,03796 | 0,152 | 0,213 | 1 |
| Gm4419    | 0,017332 | -0,03657 | 0,101 | 0,152 | 1 |
| Ppp1r12c  | 0,017384 | -0,03367 | 0,33  | 0,424 | 1 |
| BC004004  | 0,017413 | -0,05761 | 0,47  | 0,559 | 1 |
| Simc1     | 0,017432 | -0,03127 | 0,088 | 0,137 | 1 |
| Gas2l1    | 0,017438 | -0,04923 | 0,193 | 0,257 | 1 |
| Tsfm      | 0,017444 | -0,04564 | 0,176 | 0,238 | 1 |
| Pdxdc1    | 0,017481 | -0,05257 | 0,637 | 0,73  | 1 |
| Zfp664    | 0,017495 | 0,098655 | 0,699 | 0,662 | 1 |
| Nfrkb     | 0,017517 | -0,02843 | 0,239 | 0,319 | 1 |
| Slc31a1   | 0,017531 | -0,04031 | 0,064 | 0,105 | 1 |
| Eif3g     | 0,017556 | -0,05826 | 0,727 | 0,8   | 1 |
| Hist2h4   | 0,017575 | -0,01799 | 0,018 | 0,044 | 1 |
| Tfb2m     | 0,017617 | -0,03571 | 0,169 | 0,234 | 1 |
| Sirt5     | 0,017634 | -0,03013 | 0,11  | 0,165 | 1 |
| Ccdc97    | 0,017666 | -0,03656 | 0,176 | 0,243 | 1 |
| Glb1      | 0,017678 | -0,02135 | 0,026 | 0,055 | 1 |
| Ing3      | 0,017683 | -0,01542 | 0,218 | 0,297 | 1 |
| Nrde2     | 0,017706 | -0,03456 | 0,138 | 0,196 | 1 |
| Cpt2      | 0,017752 | -0,03527 | 0,138 | 0,196 | 1 |
| Aifm1     | 0,017758 | -0,05124 | 0,2   | 0,266 | 1 |
| 3110062M  | 0,017768 | -0,05661 | 0,132 | 0,186 | 1 |
| Copz1     | 0,017843 | -0,02946 | 0,453 | 0,574 | 1 |
| 2900055J2 | 0,017853 | 0,073847 | 0,128 | 0,084 | 1 |
| Zfp146    | 0,01792  | -0,03076 | 0,095 | 0,146 | 1 |
| Nelfb     | 0,017945 | -0,03249 | 0,349 | 0,441 | 1 |
| Spns1     | 0,017988 | -0,04383 | 0,439 | 0,532 | 1 |
| Kpna2     | 0,01804  | -0,03323 | 0,037 | 0,07  | 1 |
| Strbp     | 0,018043 | -0,04413 | 0,209 | 0,281 | 1 |
| Qrs1      | 0,018053 | -0,01772 | 0,051 | 0,091 | 1 |
| Aagab     | 0,018165 | -0,04919 | 0,158 | 0,215 | 1 |
| Rfx3      | 0,018166 | -0,03248 | 0,13  | 0,188 | 1 |
| Cnpy4     | 0,018183 | -0,03829 | 0,161 | 0,224 | 1 |
| Xpnpep1   | 0,018186 | -0,03551 | 0,198 | 0,266 | 1 |
| Hook2     | 0,018205 | 0,045793 | 0,066 | 0,034 | 1 |
| Dmpk      | 0,01821  | -0,04214 | 0,165 | 0,228 | 1 |
| Dbnidd2   | 0,018239 | 0,097578 | 0,993 | 0,983 | 1 |
| Pex11a    | 0,018245 | -0,03554 | 0,062 | 0,103 | 1 |
| Ddah1     | 0,018296 | -0,01721 | 0,004 | 0,019 | 1 |

|           |          |          |       |       |   |
|-----------|----------|----------|-------|-------|---|
| Gm12204   | 0,018296 | -0,01721 | 0,004 | 0,019 | 1 |
| Slc9a3r1  | 0,018298 | -0,05352 | 0,222 | 0,295 | 1 |
| Mturn     | 0,01832  | 0,101847 | 0,165 | 0,116 | 1 |
| 1810044Dl | 0,018336 | -0,03498 | 0,061 | 0,101 | 1 |
| Serpini1  | 0,018345 | -0,03018 | 0,044 | 0,08  | 1 |
| Mapk8ip2  | 0,018346 | 0,041707 | 0,042 | 0,017 | 1 |
| Rab20     | 0,018354 | -0,01515 | 0,004 | 0,019 | 1 |
| Dcaf7     | 0,018363 | -0,03254 | 0,242 | 0,321 | 1 |
| Gm28809   | 0,018394 | 0,04378  | 0,042 | 0,017 | 1 |
| Fig4      | 0,018412 | -0,04459 | 0,123 | 0,177 | 1 |
| Rfxank    | 0,018441 | -0,04882 | 0,165 | 0,226 | 1 |
| Plekha8   | 0,018489 | -0,0533  | 0,114 | 0,165 | 1 |
| Cnbd2     | 0,018509 | -0,03922 | 0,05  | 0,086 | 1 |
| Mtrf1     | 0,018509 | -0,05087 | 0,073 | 0,116 | 1 |
| Lpo       | 0,018523 | -0,02563 | 0,055 | 0,095 | 1 |
| Papola    | 0,018578 | -0,02497 | 0,639 | 0,747 | 1 |
| Herc3     | 0,018591 | -0,03914 | 0,064 | 0,105 | 1 |
| Mettl14   | 0,018594 | -0,03927 | 0,22  | 0,285 | 1 |
| Unkl      | 0,018607 | -0,04063 | 0,094 | 0,141 | 1 |
| Naga      | 0,018637 | -0,05645 | 0,2   | 0,264 | 1 |
| Thg1l     | 0,018658 | -0,03743 | 0,064 | 0,105 | 1 |
| Keap1     | 0,018687 | -0,03168 | 0,417 | 0,521 | 1 |
| 2700038G  | 0,018741 | -0,03136 | 0,061 | 0,101 | 1 |
| Pcyt1a    | 0,018746 | -0,03926 | 0,398 | 0,506 | 1 |
| Lpar1     | 0,018758 | -0,05861 | 0,974 | 0,981 | 1 |
| St8sia1   | 0,018772 | -0,01563 | 0,004 | 0,019 | 1 |
| Cd300e    | 0,018779 | -0,02495 | 0,015 | 0,038 | 1 |
| Fcf1      | 0,018827 | -0,02442 | 0,325 | 0,414 | 1 |
| Stx1b     | 0,018836 | 0,093882 | 0,161 | 0,114 | 1 |
| Morn4     | 0,018877 | -0,03875 | 0,128 | 0,184 | 1 |
| Miga2     | 0,018927 | -0,03583 | 0,112 | 0,165 | 1 |
| Zfp951    | 0,018936 | -0,02292 | 0,015 | 0,038 | 1 |
| Pskh1     | 0,018964 | -0,03671 | 0,117 | 0,171 | 1 |
| Fbxl3     | 0,018971 | 0,111544 | 0,75  | 0,762 | 1 |
| Nup160    | 0,018978 | -0,03371 | 0,154 | 0,215 | 1 |
| Myo5a     | 0,01903  | 0,139265 | 0,305 | 0,259 | 1 |
| Dffb      | 0,019091 | -0,02396 | 0,046 | 0,082 | 1 |
| mt-Nd4l   | 0,019094 | 0,086079 | 0,993 | 0,992 | 1 |
| Tspan32   | 0,019098 | -0,02719 | 0,015 | 0,038 | 1 |
| Slc39a10  | 0,019117 | 0,076185 | 0,172 | 0,122 | 1 |
| Ankrd16   | 0,019214 | -0,0291  | 0,119 | 0,175 | 1 |
| Tmem19    | 0,019217 | -0,04147 | 0,44  | 0,546 | 1 |
| Banp      | 0,019232 | -0,03021 | 0,206 | 0,276 | 1 |
| Nampt     | 0,019298 | 0,129128 | 0,611 | 0,586 | 1 |
| Cep63     | 0,019317 | -0,03488 | 0,167 | 0,232 | 1 |
| Gmeb2     | 0,019354 | -0,03865 | 0,116 | 0,169 | 1 |
| Abcb7     | 0,019363 | -0,03405 | 0,147 | 0,205 | 1 |
| Jrk       | 0,019415 | -0,02764 | 0,048 | 0,084 | 1 |
| Aip       | 0,019423 | -0,04436 | 0,538 | 0,643 | 1 |
| Stk4      | 0,019458 | -0,06466 | 0,286 | 0,357 | 1 |
| Tmem74    | 0,019519 | -0,03345 | 0,05  | 0,086 | 1 |
| Nup88     | 0,019534 | -0,04376 | 0,31  | 0,39  | 1 |

|           |          |          |       |       |   |
|-----------|----------|----------|-------|-------|---|
| Rbbp4     | 0,019553 | -0,06041 | 0,846 | 0,882 | 1 |
| Slc19a2   | 0,019584 | -0,00305 | 0,02  | 0,046 | 1 |
| Clu       | 0,019639 | -0,02075 | 0,182 | 0,247 | 1 |
| Rpl34     | 0,019669 | -0,03758 | 0,993 | 0,994 | 1 |
| Trim68    | 0,019676 | -0,03132 | 0,05  | 0,086 | 1 |
| Ndor1     | 0,019679 | -0,03711 | 0,053 | 0,091 | 1 |
| Nefl      | 0,019697 | -0,0149  | 0,002 | 0,015 | 1 |
| Ypel1     | 0,019702 | -0,01855 | 0,044 | 0,08  | 1 |
| Gm47283   | 0,019704 | 0,14495  | 0,727 | 0,7   | 1 |
| 8430432A  | 0,019734 | -0,01283 | 0,002 | 0,015 | 1 |
| Dnah7b    | 0,019734 | -0,01283 | 0,002 | 0,015 | 1 |
| Ccdc160   | 0,019734 | -0,01283 | 0,002 | 0,015 | 1 |
| Kcna3     | 0,019734 | -0,01283 | 0,002 | 0,015 | 1 |
| Spata18   | 0,019734 | -0,01283 | 0,002 | 0,015 | 1 |
| B230322F  | 0,019734 | -0,01283 | 0,002 | 0,015 | 1 |
| Gm16845   | 0,019734 | -0,01283 | 0,002 | 0,015 | 1 |
| Thy1      | 0,019734 | -0,01283 | 0,002 | 0,015 | 1 |
| Ankrd11   | 0,019747 | -0,0602  | 0,831 | 0,863 | 1 |
| Plcb1     | 0,019771 | -0,01799 | 0,015 | 0,038 | 1 |
| Vrk3      | 0,019775 | -0,0397  | 0,292 | 0,369 | 1 |
| Prmt3     | 0,019799 | -0,05322 | 0,226 | 0,293 | 1 |
| 4933406C  | 0,019802 | -0,0415  | 0,055 | 0,093 | 1 |
| Wdr43     | 0,019806 | -0,01836 | 0,372 | 0,475 | 1 |
| Dnajc21   | 0,019869 | -0,03843 | 0,341 | 0,424 | 1 |
| Gm33819   | 0,019882 | -0,01721 | 0,002 | 0,015 | 1 |
| Oprk1     | 0,019951 | 0,025044 | 0,017 | 0,002 | 1 |
| Nab2      | 0,019951 | 0,028609 | 0,017 | 0,002 | 1 |
| Daglb     | 0,019964 | -0,03407 | 0,288 | 0,367 | 1 |
| Gm32122   | 0,019979 | -0,11638 | 0,097 | 0,146 | 1 |
| Nup210l   | 0,019984 | 0,019672 | 0,017 | 0,002 | 1 |
| Hes7      | 0,019984 | 0,019672 | 0,017 | 0,002 | 1 |
| Tcf3      | 0,019986 | -0,03713 | 0,321 | 0,405 | 1 |
| Rab23     | 0,019993 | -0,03171 | 0,262 | 0,344 | 1 |
| Elavl4    | 0,019993 | -0,011   | 0,002 | 0,015 | 1 |
| Gm4724    | 0,019993 | -0,00942 | 0,002 | 0,015 | 1 |
| Cadm4     | 0,020022 | -0,0355  | 1     | 0,992 | 1 |
| 2210016F1 | 0,020046 | -0,02125 | 0,187 | 0,255 | 1 |
| Ube2t     | 0,02005  | 0,016075 | 0,017 | 0,002 | 1 |
| Gm11491   | 0,02005  | 0,016075 | 0,017 | 0,002 | 1 |
| Ap3b1     | 0,020067 | -0,04101 | 0,336 | 0,42  | 1 |
| Necap1    | 0,020077 | -0,02234 | 0,18  | 0,247 | 1 |
| A3galt2   | 0,020083 | 0,014271 | 0,017 | 0,002 | 1 |
| Lhfpl3    | 0,020092 | -0,0218  | 0,037 | 0,07  | 1 |
| Nos1ap    | 0,0201   | -0,0333  | 0,083 | 0,129 | 1 |
| Eri2      | 0,020172 | -0,03404 | 0,121 | 0,175 | 1 |
| 4921524J1 | 0,02018  | -0,03387 | 0,145 | 0,205 | 1 |
| Prrc2a    | 0,020203 | 0,118656 | 0,679 | 0,694 | 1 |
| Zfp420    | 0,020204 | -0,0408  | 0,095 | 0,143 | 1 |
| Pink1     | 0,020219 | 0,108712 | 0,824 | 0,8   | 1 |
| Mrpl38    | 0,020236 | 0,000845 | 0,314 | 0,411 | 1 |
| Mrpl24    | 0,020271 | -0,05862 | 0,602 | 0,686 | 1 |
| Cdk9      | 0,020371 | -0,02821 | 0,36  | 0,458 | 1 |

|           |          |          |       |       |   |
|-----------|----------|----------|-------|-------|---|
| Sin3b     | 0,020383 | -0,05657 | 0,554 | 0,65  | 1 |
| Ptpn3     | 0,020388 | 0,017264 | 0,017 | 0,002 | 1 |
| Mipep     | 0,020388 | -0,03403 | 0,068 | 0,11  | 1 |
| Ccdc59    | 0,020423 | -0,05372 | 0,646 | 0,745 | 1 |
| Ppp2r3a   | 0,020457 | -0,06986 | 0,917 | 0,922 | 1 |
| Oxsm      | 0,020526 | -0,01734 | 0,059 | 0,099 | 1 |
| Cxxc5     | 0,020556 | 0,110155 | 0,85  | 0,85  | 1 |
| Sash1     | 0,020572 | -0,06914 | 0,717 | 0,789 | 1 |
| Fadd      | 0,02061  | -0,04814 | 0,11  | 0,16  | 1 |
| Slc30a1   | 0,020643 | 0,130396 | 0,248 | 0,2   | 1 |
| Palb2     | 0,020679 | -0,02225 | 0,011 | 0,032 | 1 |
| Trim39    | 0,020706 | -0,03705 | 0,171 | 0,232 | 1 |
| Rnf139    | 0,020771 | -0,02858 | 0,29  | 0,373 | 1 |
| Pycard    | 0,020792 | 0,049523 | 0,062 | 0,032 | 1 |
| Ifi2712a  | 0,020845 | 0,345406 | 0,105 | 0,065 | 1 |
| Rnf115    | 0,020849 | -0,01857 | 0,339 | 0,437 | 1 |
| Cdc14b    | 0,020871 | -0,04091 | 0,072 | 0,114 | 1 |
| Apobr     | 0,020897 | -0,02247 | 0,011 | 0,032 | 1 |
| Pphln1    | 0,020914 | -0,04455 | 0,229 | 0,297 | 1 |
| Itpkb     | 0,020945 | -0,02066 | 0,011 | 0,032 | 1 |
| Strip2    | 0,020988 | 0,045477 | 0,048 | 0,021 | 1 |
| Mtf2      | 0,021003 | -0,01409 | 0,334 | 0,422 | 1 |
| Alyref2   | 0,021003 | -0,04119 | 0,116 | 0,167 | 1 |
| Ss18l1    | 0,021059 | -0,03683 | 0,077 | 0,12  | 1 |
| P3h3      | 0,021073 | -0,03199 | 0,007 | 0,025 | 1 |
| Washc1    | 0,021141 | -0,04247 | 0,31  | 0,39  | 1 |
| Tars2     | 0,021156 | -0,04104 | 0,2   | 0,268 | 1 |
| B3gnt1    | 0,021225 | -0,0248  | 0,053 | 0,091 | 1 |
| Rbm15     | 0,021248 | -0,01058 | 0,312 | 0,405 | 1 |
| Ppih      | 0,021252 | -0,03038 | 0,134 | 0,19  | 1 |
| A230107Nl | 0,021293 | -0,01974 | 0,007 | 0,025 | 1 |
| Actr5     | 0,021323 | -0,02413 | 0,13  | 0,188 | 1 |
| Alg13     | 0,021334 | -0,04589 | 0,108 | 0,158 | 1 |
| Psma3     | 0,021338 | -0,04521 | 0,89  | 0,899 | 1 |
| Nap1l4    | 0,02134  | -0,04107 | 0,824 | 0,886 | 1 |
| Elovl4    | 0,021362 | 0,068859 | 0,176 | 0,127 | 1 |
| Plagl2    | 0,021369 | -0,02915 | 0,066 | 0,108 | 1 |
| Crot      | 0,021411 | -0,04319 | 0,261 | 0,335 | 1 |
| Med17     | 0,021423 | -0,04782 | 0,27  | 0,34  | 1 |
| Myo1d     | 0,021486 | -0,04204 | 0,776 | 0,838 | 1 |
| Ncbp1     | 0,021504 | -0,04172 | 0,222 | 0,291 | 1 |
| Sorbs1    | 0,021531 | -0,03299 | 0,128 | 0,184 | 1 |
| Rest      | 0,021556 | -0,02102 | 0,286 | 0,376 | 1 |
| Atg4b     | 0,021587 | -0,05408 | 0,323 | 0,403 | 1 |
| Grsf1     | 0,021591 | -0,03473 | 0,143 | 0,2   | 1 |
| Psmd7     | 0,021605 | -0,04427 | 0,857 | 0,914 | 1 |
| Eif3c     | 0,021615 | 0,084527 | 0,947 | 0,945 | 1 |
| Gabrr2    | 0,021633 | -0,04212 | 0,024 | 0,051 | 1 |
| Trmt10c   | 0,021634 | -0,0389  | 0,108 | 0,158 | 1 |
| Rngtt     | 0,021646 | -0,03775 | 0,273 | 0,348 | 1 |
| Fmn1      | 0,021658 | 0,115064 | 0,27  | 0,217 | 1 |
| 311008211 | 0,02167  | -0,03106 | 0,031 | 0,061 | 1 |

|           |          |          |       |       |   |
|-----------|----------|----------|-------|-------|---|
| Ribc1     | 0,021673 | -0,02539 | 0,017 | 0,04  | 1 |
| Nbl1      | 0,021744 | -0,01405 | 0,007 | 0,025 | 1 |
| Fhl1      | 0,021752 | -0,03836 | 0,396 | 0,496 | 1 |
| Prr11     | 0,021778 | -0,01682 | 0,011 | 0,032 | 1 |
| Gpr107    | 0,021795 | -0,03525 | 0,349 | 0,447 | 1 |
| Gm46430   | 0,021797 | -0,03403 | 0,077 | 0,12  | 1 |
| Mga       | 0,021834 | 0,155676 | 0,536 | 0,506 | 1 |
| Kat5      | 0,021856 | -0,02779 | 0,244 | 0,321 | 1 |
| Eif1ad    | 0,021899 | -0,03708 | 0,211 | 0,276 | 1 |
| 2510009EC | 0,021944 | 0,138148 | 0,598 | 0,576 | 1 |
| Clptm1l   | 0,021955 | -0,06258 | 0,508 | 0,599 | 1 |
| Gm17484   | 0,021958 | -0,02908 | 0,031 | 0,061 | 1 |
| Shmt1     | 0,021998 | -0,03092 | 0,04  | 0,074 | 1 |
| Gnb5      | 0,022    | -0,02714 | 0,119 | 0,173 | 1 |
| Gfm1      | 0,022002 | -0,02447 | 0,147 | 0,207 | 1 |
| Mcm3ap    | 0,022061 | -0,04696 | 0,18  | 0,241 | 1 |
| Tnc       | 0,022068 | 0,010949 | 0,011 | 0     | 1 |
| Gm26745   | 0,022068 | 0,010949 | 0,011 | 0     | 1 |
| Gm44700   | 0,022068 | 0,010949 | 0,011 | 0     | 1 |
| Unc5a     | 0,022068 | 0,014572 | 0,011 | 0     | 1 |
| Pigr      | 0,022068 | 0,012762 | 0,011 | 0     | 1 |
| Gm37634   | 0,022068 | 0,012762 | 0,011 | 0     | 1 |
| Olfr1238  | 0,022068 | 0,012762 | 0,011 | 0     | 1 |
| Gm26784   | 0,022068 | 0,014572 | 0,011 | 0     | 1 |
| Olfr328   | 0,022068 | 0,014572 | 0,011 | 0     | 1 |
| Mocos     | 0,022069 | 0,019982 | 0,011 | 0     | 1 |
| AC125141. | 0,022069 | 0,018182 | 0,011 | 0     | 1 |
| Olfr267   | 0,022069 | 0,016379 | 0,011 | 0     | 1 |
| Selplg    | 0,022069 | 0,016379 | 0,011 | 0     | 1 |
| Ppp1r18os | 0,022069 | 0,016379 | 0,011 | 0     | 1 |
| Aqp5      | 0,022069 | 0,021779 | 0,011 | 0     | 1 |
| Lsmem1    | 0,022069 | 0,019982 | 0,011 | 0     | 1 |
| ligp1     | 0,022069 | 0,039574 | 0,011 | 0     | 1 |
| Galnt5    | 0,022069 | 0,021779 | 0,011 | 0     | 1 |
| Supt5     | 0,022092 | 0,132585 | 0,53  | 0,513 | 1 |
| Ilf3      | 0,022131 | 0,118476 | 0,516 | 0,489 | 1 |
| Sp2       | 0,022179 | -0,03532 | 0,222 | 0,293 | 1 |
| Zfp64     | 0,022211 | -0,03646 | 0,147 | 0,205 | 1 |
| C920021L1 | 0,022273 | -0,02576 | 0,031 | 0,061 | 1 |
| Rgs17     | 0,022339 | 0,059976 | 0,053 | 0,025 | 1 |
| B3gat1    | 0,022342 | -0,04058 | 0,332 | 0,418 | 1 |
| Esyt1     | 0,022356 | 0,054103 | 0,081 | 0,046 | 1 |
| Npepps    | 0,022363 | -0,05351 | 0,853 | 0,884 | 1 |
| Nudcd3    | 0,022401 | 0,114832 | 0,699 | 0,696 | 1 |
| Cstf2t    | 0,022403 | -0,02261 | 0,284 | 0,369 | 1 |
| Secisbp2  | 0,022456 | -0,02042 | 0,323 | 0,411 | 1 |
| Apex1     | 0,022493 | -0,03184 | 0,099 | 0,148 | 1 |
| Slc25a53  | 0,022535 | -0,03441 | 0,044 | 0,078 | 1 |
| Exosc10   | 0,022569 | -0,01766 | 0,272 | 0,357 | 1 |
| Tle6      | 0,02257  | -0,03441 | 0,057 | 0,095 | 1 |
| Tstd3     | 0,02259  | -0,0321  | 0,057 | 0,095 | 1 |
| Fech      | 0,022634 | -0,07128 | 0,602 | 0,673 | 1 |



|           |          |          |       |       |   |
|-----------|----------|----------|-------|-------|---|
| Hist4h4   | 0,022634 | 0,053725 | 0,044 | 0,019 | 1 |
| Wdr5      | 0,022659 | -0,02561 | 0,106 | 0,156 | 1 |
| Rragd     | 0,022698 | 0,029544 | 0,035 | 0,013 | 1 |
| Cyb5rl    | 0,022733 | -0,0194  | 0,039 | 0,072 | 1 |
| Bmp2      | 0,022829 | -0,01556 | 0,042 | 0,076 | 1 |
| Gm15853   | 0,022903 | -0,03247 | 0,044 | 0,078 | 1 |
| Fxn       | 0,022907 | -0,02598 | 0,068 | 0,11  | 1 |
| Wdr36     | 0,022934 | -0,03924 | 0,11  | 0,16  | 1 |
| Stim1     | 0,022935 | -0,04331 | 0,525 | 0,629 | 1 |
| Nom1      | 0,022976 | -0,02424 | 0,218 | 0,289 | 1 |
| 1700037C: | 0,022992 | -0,04235 | 0,127 | 0,179 | 1 |
| AC127341. | 0,023002 | 0,045131 | 0,059 | 0,03  | 1 |
| Mfsd8     | 0,023007 | -0,04052 | 0,226 | 0,295 | 1 |
| Prkra     | 0,023054 | -0,04052 | 0,182 | 0,243 | 1 |
| Tedc2     | 0,023068 | -0,02332 | 0,04  | 0,074 | 1 |
| Mtpn      | 0,023101 | -0,016   | 0,341 | 0,437 | 1 |
| Tspo      | 0,023155 | 0,068413 | 0,147 | 0,101 | 1 |
| Lrrc4     | 0,02316  | 0,071143 | 0,209 | 0,156 | 1 |
| Dtx1      | 0,023169 | 0,052895 | 0,059 | 0,03  | 1 |
| Zfp790    | 0,023256 | -0,02694 | 0,057 | 0,095 | 1 |
| Nt5c3b    | 0,023268 | -0,03655 | 0,248 | 0,319 | 1 |
| Tubb6     | 0,023288 | 0,024725 | 0,02  | 0,004 | 1 |
| Clptm1    | 0,023333 | 0,090873 | 0,809 | 0,795 | 1 |
| Lfng      | 0,023355 | 0,028283 | 0,02  | 0,004 | 1 |
| Gm26884   | 0,023421 | 0,026506 | 0,02  | 0,004 | 1 |
| Arfrp1    | 0,023437 | -0,02935 | 0,347 | 0,435 | 1 |
| Malat1    | 0,023443 | 0,09722  | 0,998 | 0,998 | 1 |
| Spink10   | 0,023499 | -0,02752 | 0,033 | 0,063 | 1 |
| Aco2      | 0,023533 | -0,05571 | 0,804 | 0,867 | 1 |
| Ikzf5     | 0,023535 | -0,00492 | 0,376 | 0,492 | 1 |
| Nlrc3     | 0,023555 | 0,019363 | 0,02  | 0,004 | 1 |
| Ptprf     | 0,023565 | 0,138183 | 0,549 | 0,53  | 1 |
| Rc3h2     | 0,02357  | 0,137324 | 0,606 | 0,603 | 1 |
| Tdrd7     | 0,023619 | -0,04399 | 0,224 | 0,291 | 1 |
| Gm49077   | 0,023621 | 0,015772 | 0,02  | 0,004 | 1 |
| Creb1     | 0,023652 | 0,129321 | 0,517 | 0,498 | 1 |
| Sec14l2   | 0,023656 | -0,05462 | 0,178 | 0,236 | 1 |
| Ptpn21    | 0,023706 | -0,0318  | 0,07  | 0,112 | 1 |
| Gm26840   | 0,023745 | 0,02523  | 0,031 | 0,011 | 1 |
| Hoxaas3   | 0,023886 | -0,02468 | 0,024 | 0,051 | 1 |
| 1190002N: | 0,023947 | -0,02879 | 0,299 | 0,382 | 1 |
| Rad50     | 0,023967 | -0,01064 | 0,211 | 0,285 | 1 |
| Prdx5     | 0,02398  | -0,03182 | 0,646 | 0,77  | 1 |
| Dnm2      | 0,024011 | 0,082142 | 0,901 | 0,867 | 1 |
| Herpud1   | 0,024026 | -0,03983 | 0,426 | 0,523 | 1 |
| Plekhh3   | 0,02406  | 0,064918 | 0,083 | 0,049 | 1 |
| Arl4c     | 0,024091 | 0,053503 | 0,064 | 0,034 | 1 |
| Pi4k2a    | 0,024141 | -0,01771 | 0,283 | 0,363 | 1 |
| Rfng      | 0,02417  | -0,02826 | 0,152 | 0,213 | 1 |
| Prox1     | 0,024195 | 0,106774 | 0,914 | 0,89  | 1 |
| Rhog      | 0,024212 | -0,04293 | 0,982 | 0,983 | 1 |
| Fbln7     | 0,024221 | -0,03223 | 0,026 | 0,053 | 1 |

|          |          |          |       |       |   |
|----------|----------|----------|-------|-------|---|
| Tex261   | 0,024327 | -0,05687 | 0,585 | 0,673 | 1 |
| Emp2     | 0,024345 | 0,03995  | 0,024 | 0,006 | 1 |
| Rlf      | 0,024357 | -0,01442 | 0,349 | 0,445 | 1 |
| Mpnd     | 0,024361 | -0,04367 | 0,36  | 0,456 | 1 |
| Tial1    | 0,024422 | -0,0513  | 0,602 | 0,677 | 1 |
| Fam184b  | 0,024438 | 0,02409  | 0,028 | 0,008 | 1 |
| Ang      | 0,024448 | 0,055763 | 0,059 | 0,03  | 1 |
| Lars     | 0,024467 | -0,0225  | 0,382 | 0,473 | 1 |
| Ssr3     | 0,024504 | -0,04476 | 0,886 | 0,93  | 1 |
| Dcbld2   | 0,024513 | 0,120026 | 0,299 | 0,249 | 1 |
| Zfp655   | 0,024578 | -0,03207 | 0,248 | 0,319 | 1 |
| Mitd1    | 0,024608 | -0,04734 | 0,218 | 0,285 | 1 |
| Rpusd3   | 0,024628 | -0,03674 | 0,05  | 0,084 | 1 |
| A430033K | 0,024692 | -0,03827 | 0,088 | 0,133 | 1 |
| Gm14443  | 0,024713 | -0,02654 | 0,013 | 0,034 | 1 |
| Sec11a   | 0,024716 | -0,01703 | 0,325 | 0,418 | 1 |
| Csrnp2   | 0,024746 | 0,039762 | 0,092 | 0,055 | 1 |
| Ddx55    | 0,024784 | -0,02646 | 0,279 | 0,357 | 1 |
| 6720489N | 0,024786 | -0,03867 | 0,051 | 0,086 | 1 |
| Frzb     | 0,024818 | 0,027637 | 0,024 | 0,006 | 1 |
| Usp48    | 0,024825 | -0,15789 | 0,488 | 0,563 | 1 |
| Mb21d2   | 0,024829 | -0,04328 | 0,106 | 0,154 | 1 |
| 4930579G | 0,024832 | -0,0395  | 0,101 | 0,148 | 1 |
| Ctps     | 0,02485  | -0,06499 | 0,128 | 0,184 | 1 |
| Smc2os   | 0,024898 | -0,02247 | 0,013 | 0,034 | 1 |
| Rnf31    | 0,024904 | 0,096161 | 0,228 | 0,177 | 1 |
| Trim62   | 0,02494  | 0,050079 | 0,081 | 0,046 | 1 |
| Zdhhc21  | 0,024941 | -0,02921 | 0,268 | 0,348 | 1 |
| Cacul1   | 0,024956 | 0,108505 | 0,407 | 0,367 | 1 |
| Slc25a42 | 0,024971 | -0,04705 | 0,103 | 0,15  | 1 |
| Atad3aos | 0,025014 | -0,03517 | 0,064 | 0,103 | 1 |
| Phb2     | 0,025027 | -0,04139 | 0,516 | 0,614 | 1 |
| Atp6v0b  | 0,025106 | -0,01839 | 0,993 | 0,989 | 1 |
| Kcna4    | 0,025116 | -0,02473 | 0,013 | 0,034 | 1 |
| Usp11    | 0,025127 | -0,03985 | 0,257 | 0,329 | 1 |
| AC158554 | 0,025144 | 0,031087 | 0,059 | 0,03  | 1 |
| Rabggtb  | 0,025195 | -0,06267 | 0,272 | 0,335 | 1 |
| Gm43062  | 0,025201 | 0,018748 | 0,024 | 0,006 | 1 |
| 1810021B | 0,025268 | -0,02135 | 0,018 | 0,042 | 1 |
| Ttc19    | 0,025292 | -0,02517 | 0,283 | 0,363 | 1 |
| Rcan2    | 0,025295 | 0,107221 | 0,943 | 0,949 | 1 |
| Cep112   | 0,025314 | 0,071245 | 0,061 | 0,032 | 1 |
| Lypd6b   | 0,025337 | -0,02242 | 0,072 | 0,114 | 1 |
| Mast2    | 0,025426 | -0,02938 | 0,204 | 0,27  | 1 |
| Rcan3    | 0,025464 | -0,03236 | 0,158 | 0,217 | 1 |
| Qtrt2    | 0,025466 | -0,04069 | 0,099 | 0,146 | 1 |
| Rps28    | 0,025468 | 0,098289 | 0,987 | 0,989 | 1 |
| Terf1    | 0,025468 | -0,02042 | 0,244 | 0,323 | 1 |
| Slc39a6  | 0,0255   | -0,03144 | 0,218 | 0,287 | 1 |
| Nars2    | 0,02551  | -0,03546 | 0,123 | 0,175 | 1 |
| C1qc     | 0,025524 | -0,02292 | 0,013 | 0,034 | 1 |
| Prim1    | 0,025525 | -0,03078 | 0,182 | 0,245 | 1 |

|          |          |          |       |       |   |
|----------|----------|----------|-------|-------|---|
| Mthfsd   | 0,025537 | -0,02545 | 0,141 | 0,198 | 1 |
| Bcl7a    | 0,025574 | -0,01743 | 0,539 | 0,665 | 1 |
| 4930570G | 0,025579 | -0,02089 | 0,013 | 0,034 | 1 |
| Lrp1b    | 0,02562  | -0,0407  | 0,908 | 0,926 | 1 |
| Dcaf4    | 0,025653 | -0,05149 | 0,191 | 0,249 | 1 |
| Gmip     | 0,025654 | 0,038964 | 0,05  | 0,023 | 1 |
| Acbd3    | 0,02568  | -0,02166 | 0,422 | 0,523 | 1 |
| Mkrn1    | 0,025704 | -0,06666 | 0,76  | 0,816 | 1 |
| Pgap2    | 0,025732 | -0,04843 | 0,53  | 0,624 | 1 |
| Cdc7     | 0,025738 | -0,03346 | 0,064 | 0,103 | 1 |
| Afap1    | 0,025756 | 0,144946 | 0,495 | 0,483 | 1 |
| Mcph1    | 0,02577  | -0,01886 | 0,013 | 0,034 | 1 |
| Wdr76    | 0,025774 | -0,02098 | 0,095 | 0,143 | 1 |
| Col9a2   | 0,025807 | -0,02605 | 0,061 | 0,099 | 1 |
| Slc35e4  | 0,025821 | -0,05413 | 0,435 | 0,53  | 1 |
| Gars     | 0,025858 | -0,02012 | 0,411 | 0,517 | 1 |
| Tubb3    | 0,025871 | 0,109658 | 0,692 | 0,652 | 1 |
| Prdx4    | 0,025918 | -0,02581 | 0,4   | 0,502 | 1 |
| Rnf25    | 0,025939 | -0,03334 | 0,136 | 0,19  | 1 |
| Pcdhga8  | 0,025973 | -0,01822 | 0,018 | 0,042 | 1 |
| G2e3     | 0,025978 | -0,03755 | 0,237 | 0,308 | 1 |
| Chn1     | 0,025994 | 0,069478 | 0,143 | 0,099 | 1 |
| Pou6f1   | 0,026027 | 0,081332 | 0,169 | 0,122 | 1 |
| Trps1    | 0,026032 | -0,03537 | 0,433 | 0,527 | 1 |
| Stk11    | 0,026053 | 0,126415 | 0,519 | 0,506 | 1 |
| Sumf2    | 0,026069 | -0,03013 | 0,125 | 0,177 | 1 |
| Pbrm1    | 0,026147 | 0,127242 | 0,758 | 0,766 | 1 |
| Zfp84    | 0,02615  | -0,0218  | 0,171 | 0,232 | 1 |
| Psip1    | 0,026154 | -0,05419 | 0,916 | 0,937 | 1 |
| Etaa1    | 0,02618  | -0,03455 | 0,156 | 0,213 | 1 |
| Gm27029  | 0,02624  | -0,01776 | 0,018 | 0,042 | 1 |
| Camkk2   | 0,026278 | -0,01606 | 0,026 | 0,053 | 1 |
| Spata13  | 0,026285 | -0,03333 | 0,108 | 0,158 | 1 |
| Pdcd2l   | 0,026304 | -0,03697 | 0,16  | 0,217 | 1 |
| Rragb    | 0,026347 | -0,03983 | 0,13  | 0,181 | 1 |
| Gtpbp6   | 0,026368 | -0,03352 | 0,321 | 0,407 | 1 |
| Acbd6    | 0,026377 | -0,035   | 0,506 | 0,618 | 1 |
| Slmap    | 0,026415 | -0,03484 | 0,226 | 0,293 | 1 |
| Aars2    | 0,026448 | -0,03743 | 0,075 | 0,116 | 1 |
| Adss     | 0,026528 | -0,02707 | 0,231 | 0,302 | 1 |
| Fam151b  | 0,026564 | -0,05852 | 0,165 | 0,217 | 1 |
| Tspan31  | 0,02666  | -0,03969 | 0,611 | 0,707 | 1 |
| Tspan5   | 0,026664 | -0,05367 | 0,743 | 0,821 | 1 |
| Slc20a1  | 0,026679 | 0,090089 | 0,191 | 0,143 | 1 |
| Gtf3c2   | 0,026681 | 0,09936  | 0,517 | 0,487 | 1 |
| Rasip1   | 0,026698 | 0,060035 | 0,095 | 0,059 | 1 |
| Foxj1    | 0,026717 | -0,04721 | 0,13  | 0,181 | 1 |
| Rnpc3    | 0,026742 | -0,02204 | 0,453 | 0,551 | 1 |
| Ikbip    | 0,026792 | -0,06297 | 0,196 | 0,255 | 1 |
| Elk4     | 0,026816 | 0,124942 | 0,382 | 0,34  | 1 |
| Fbxw16   | 0,026839 | -0,03017 | 0,009 | 0,027 | 1 |
| Cdkn1c   | 0,026905 | 0,040307 | 0,473 | 0,407 | 1 |

|            |          |          |       |       |   |
|------------|----------|----------|-------|-------|---|
| Vldlr      | 0,02693  | 0,110307 | 0,868 | 0,909 | 1 |
| Sox13      | 0,02707  | -0,02611 | 0,048 | 0,082 | 1 |
| Spg21      | 0,027071 | -0,0345  | 0,306 | 0,386 | 1 |
| Srek1ip1   | 0,027088 | -0,03555 | 0,156 | 0,213 | 1 |
| Anapc15    | 0,027105 | -0,03842 | 0,128 | 0,181 | 1 |
| Gins3      | 0,027158 | -0,03018 | 0,05  | 0,084 | 1 |
| Nmral1     | 0,02717  | -0,08005 | 0,883 | 0,905 | 1 |
| Slx4       | 0,027176 | -0,04293 | 0,086 | 0,129 | 1 |
| CAAA011118 | 0,027216 | -0,02958 | 0,231 | 0,302 | 1 |
| Anks1      | 0,027256 | -0,01582 | 0,202 | 0,274 | 1 |
| Ttc30b     | 0,027274 | -0,03958 | 0,086 | 0,129 | 1 |
| Stk38      | 0,027316 | -0,04854 | 0,283 | 0,357 | 1 |
| Erich3     | 0,027354 | -0,04694 | 0,083 | 0,124 | 1 |
| Uprt       | 0,027376 | -0,01199 | 0,006 | 0,021 | 1 |
| Selenot    | 0,027429 | -0,04578 | 0,93  | 0,937 | 1 |
| Eif3e      | 0,027465 | -0,06357 | 0,65  | 0,698 | 1 |
| 6720483Ez  | 0,027485 | -0,01792 | 0,009 | 0,027 | 1 |
| Ly6g6e     | 0,027543 | -0,05768 | 0,061 | 0,097 | 1 |
| Sirt7      | 0,027545 | -0,00466 | 0,334 | 0,432 | 1 |
| Gm4631     | 0,027577 | -0,04018 | 0,108 | 0,156 | 1 |
| Ubr5       | 0,027587 | 0,123139 | 0,583 | 0,576 | 1 |
| Erp29      | 0,027606 | -0,0386  | 0,683 | 0,757 | 1 |
| Mypop      | 0,027664 | -0,01283 | 0,11  | 0,162 | 1 |
| Stx17      | 0,027694 | -0,01196 | 0,343 | 0,435 | 1 |
| Fam120aos  | 0,027733 | -0,02223 | 0,037 | 0,068 | 1 |
| Spen       | 0,027744 | 0,125529 | 0,525 | 0,502 | 1 |
| 2310022Bc  | 0,02775  | -0,09094 | 0,774 | 0,806 | 1 |
| Smco4      | 0,027763 | -0,01199 | 0,006 | 0,021 | 1 |
| Mtmr1      | 0,027764 | -0,04571 | 0,206 | 0,266 | 1 |
| Cldn11     | 0,027765 | -0,05864 | 1     | 0,998 | 1 |
| Ehmt1      | 0,02785  | -0,01776 | 0,327 | 0,414 | 1 |
| Zfp30      | 0,02785  | -0,02593 | 0,114 | 0,165 | 1 |
| Zfp407     | 0,027888 | -0,04151 | 0,152 | 0,207 | 1 |
| Eif1ax     | 0,027891 | -0,0299  | 0,64  | 0,736 | 1 |
| 5730409Ec  | 0,027892 | -0,03219 | 0,149 | 0,205 | 1 |
| Golgb1     | 0,027912 | -0,05455 | 0,543 | 0,652 | 1 |
| Emb        | 0,027916 | -0,01611 | 0,009 | 0,027 | 1 |
| Ildr1      | 0,027916 | -0,01611 | 0,009 | 0,027 | 1 |
| Cwf19l1    | 0,028022 | -0,02139 | 0,106 | 0,156 | 1 |
| Apoo       | 0,028073 | -0,03659 | 0,165 | 0,224 | 1 |
| Fat1       | 0,028103 | -0,0263  | 0,338 | 0,426 | 1 |
| Mospd3     | 0,028178 | -0,04108 | 0,128 | 0,179 | 1 |
| Cep152     | 0,028226 | -0,02442 | 0,037 | 0,068 | 1 |
| Atg4a      | 0,028238 | -0,03494 | 0,108 | 0,156 | 1 |
| Dopey1     | 0,028245 | -0,0186  | 0,394 | 0,498 | 1 |
| Fam160b1   | 0,02825  | -0,03704 | 0,213 | 0,278 | 1 |
| Lgals3     | 0,028283 | 0,205024 | 0,079 | 0,046 | 1 |
| Emp1       | 0,028304 | 0,146035 | 0,037 | 0,015 | 1 |
| Zfp609     | 0,028415 | -0,01064 | 0,233 | 0,306 | 1 |
| Msl2       | 0,028436 | 0,126316 | 0,396 | 0,352 | 1 |
| Zfp426     | 0,028439 | -0,0271  | 0,16  | 0,219 | 1 |
| Ints8      | 0,028453 | -0,03163 | 0,145 | 0,2   | 1 |

|          |          |          |       |       |   |
|----------|----------|----------|-------|-------|---|
| Pgd      | 0,028487 | -0,04075 | 0,226 | 0,291 | 1 |
| Htra2    | 0,028528 | -0,03079 | 0,141 | 0,196 | 1 |
| Szrd1    | 0,028548 | -0,01312 | 0,338 | 0,426 | 1 |
| Fastkd2  | 0,028576 | -0,03404 | 0,099 | 0,146 | 1 |
| Dus1l    | 0,028616 | -0,03623 | 0,174 | 0,234 | 1 |
| Arrdc3   | 0,028642 | 0,115983 | 0,943 | 0,937 | 1 |
| Ube4a    | 0,028676 | -0,02919 | 0,394 | 0,489 | 1 |
| Hcfc2    | 0,028715 | -0,03614 | 0,204 | 0,268 | 1 |
| Snx12    | 0,028737 | -0,03015 | 0,202 | 0,268 | 1 |
| Pblld1   | 0,028825 | 0,030191 | 0,037 | 0,015 | 1 |
| Trpt1    | 0,028836 | -0,03279 | 0,114 | 0,162 | 1 |
| Nup37    | 0,028838 | -0,01978 | 0,02  | 0,044 | 1 |
| Ltv1     | 0,028854 | -0,03979 | 0,231 | 0,295 | 1 |
| Prps2    | 0,028891 | -0,04728 | 0,327 | 0,405 | 1 |
| Dennd4b  | 0,029003 | 0,119253 | 0,266 | 0,222 | 1 |
| Gpr27    | 0,029021 | 0,031943 | 0,037 | 0,015 | 1 |
| Fchsd2   | 0,029025 | 0,035917 | 0,061 | 0,032 | 1 |
| Acadm    | 0,029084 | -0,01949 | 0,319 | 0,409 | 1 |
| Slc12a8  | 0,029093 | -0,02676 | 0,015 | 0,036 | 1 |
| Nhp2     | 0,02912  | -0,03129 | 0,286 | 0,363 | 1 |
| Rnf40    | 0,029137 | -0,03957 | 0,174 | 0,232 | 1 |
| Slc9a9   | 0,029252 | -0,04649 | 0,178 | 0,234 | 1 |
| Mapk8ip3 | 0,029279 | 0,095303 | 0,743 | 0,73  | 1 |
| Pinx1    | 0,029286 | -0,04838 | 0,121 | 0,169 | 1 |
| Gm15050  | 0,029301 | -0,03461 | 0,031 | 0,059 | 1 |
| Gm26610  | 0,029327 | -0,02066 | 0,015 | 0,036 | 1 |
| Tspoap1  | 0,029327 | -0,02066 | 0,015 | 0,036 | 1 |
| Cd55     | 0,029362 | -0,02292 | 0,015 | 0,036 | 1 |
| Hspd1    | 0,02938  | -0,05187 | 0,848 | 0,89  | 1 |
| Micu2    | 0,029392 | -0,0218  | 0,444 | 0,568 | 1 |
| Phf20    | 0,029499 | 0,107135 | 0,701 | 0,684 | 1 |
| Ppard    | 0,029515 | -0,0379  | 0,213 | 0,274 | 1 |
| Brca2    | 0,029656 | -0,04495 | 0,062 | 0,099 | 1 |
| Bud13    | 0,029702 | -0,0248  | 0,053 | 0,089 | 1 |
| Armc6    | 0,029776 | -0,03899 | 0,121 | 0,171 | 1 |
| Cxxc1    | 0,029805 | -0,03943 | 0,286 | 0,361 | 1 |
| Utp14a   | 0,02986  | -0,02097 | 0,262 | 0,342 | 1 |
| Bbs9     | 0,029908 | -0,02487 | 0,092 | 0,137 | 1 |
| Cks1b    | 0,02991  | -0,03481 | 0,031 | 0,059 | 1 |
| Chd6     | 0,029945 | 0,107914 | 0,719 | 0,709 | 1 |
| Tbc1d8b  | 0,029964 | -0,02856 | 0,04  | 0,072 | 1 |
| Cdc5l    | 0,029995 | -0,03639 | 0,576 | 0,681 | 1 |
| Ogfod3   | 0,030085 | -0,04308 | 0,176 | 0,234 | 1 |
| Lancl2   | 0,030098 | -0,06117 | 0,185 | 0,241 | 1 |
| Zfp966   | 0,030141 | -0,01729 | 0,015 | 0,036 | 1 |
| Cds2     | 0,030261 | 0,094836 | 0,738 | 0,711 | 1 |
| Brms1l   | 0,030285 | -0,0205  | 0,286 | 0,367 | 1 |
| Drg1     | 0,03033  | -0,03651 | 0,45  | 0,553 | 1 |
| Ncdn     | 0,030378 | -0,0414  | 0,521 | 0,637 | 1 |
| Atrip    | 0,030435 | -0,02237 | 0,145 | 0,2   | 1 |
| Spa17    | 0,030493 | -0,03636 | 0,044 | 0,076 | 1 |
| Hdhd5    | 0,030502 | -0,03366 | 0,086 | 0,129 | 1 |

|           |          |          |       |       |   |
|-----------|----------|----------|-------|-------|---|
| Map3k13   | 0,030539 | -0,02658 | 0,077 | 0,118 | 1 |
| Tpst2     | 0,03067  | -0,03696 | 0,202 | 0,264 | 1 |
| Trib1     | 0,030694 | 0,114268 | 0,105 | 0,068 | 1 |
| Cyp2d22   | 0,030729 | 0,081989 | 0,099 | 0,063 | 1 |
| Gipr      | 0,030735 | -0,03474 | 0,103 | 0,15  | 1 |
| Pdhb      | 0,030741 | -0,02263 | 0,523 | 0,633 | 1 |
| March8    | 0,030788 | -0,06301 | 0,851 | 0,903 | 1 |
| Tmem267   | 0,030824 | -0,02658 | 0,083 | 0,124 | 1 |
| Rxrb      | 0,03088  | -0,03666 | 0,424 | 0,515 | 1 |
| Plin3     | 0,030954 | -0,251   | 0,719 | 0,736 | 1 |
| Rchy1     | 0,030967 | -0,04073 | 0,572 | 0,679 | 1 |
| Insm1     | 0,030972 | -0,01215 | 0,015 | 0,036 | 1 |
| Ifrd2     | 0,031001 | -0,03293 | 0,088 | 0,131 | 1 |
| Atp6v1a   | 0,031033 | 0,065611 | 0,866 | 0,814 | 1 |
| Ankhd1    | 0,031056 | 0,138016 | 0,517 | 0,523 | 1 |
| Herc2     | 0,031062 | -0,05778 | 0,633 | 0,724 | 1 |
| Trmo      | 0,03107  | -0,02866 | 0,059 | 0,095 | 1 |
| Gne       | 0,031136 | -0,02451 | 0,139 | 0,192 | 1 |
| Pigm      | 0,031168 | -0,02275 | 0,145 | 0,2   | 1 |
| 5031425Ez | 0,031199 | -0,02996 | 0,237 | 0,306 | 1 |
| Otub1     | 0,031213 | -0,04474 | 0,565 | 0,654 | 1 |
| Mbip      | 0,03135  | -0,044   | 0,29  | 0,365 | 1 |
| Paqr8     | 0,031359 | -0,08151 | 0,514 | 0,601 | 1 |
| Pald1     | 0,031394 | 0,065284 | 0,172 | 0,127 | 1 |
| Psrc1     | 0,031423 | 0,039265 | 0,033 | 0,013 | 1 |
| Ginm1     | 0,031473 | -0,0051  | 0,262 | 0,34  | 1 |
| Usp1      | 0,031525 | -0,02318 | 0,312 | 0,397 | 1 |
| Ofd1      | 0,031579 | -0,029   | 0,127 | 0,179 | 1 |
| Ivd       | 0,031637 | -0,04277 | 0,321 | 0,399 | 1 |
| Mcm8      | 0,03165  | -0,02954 | 0,077 | 0,118 | 1 |
| Adcy5     | 0,0317   | 0,103579 | 0,615 | 0,595 | 1 |
| Emc8      | 0,031773 | -0,03432 | 0,58  | 0,696 | 1 |
| Id4       | 0,031805 | 0,009542 | 0,086 | 0,131 | 1 |
| Igfbp2    | 0,031814 | -0,0084  | 0     | 0,008 | 1 |
| Resp18    | 0,031814 | -0,0084  | 0     | 0,008 | 1 |
| 4930447M  | 0,031814 | -0,0084  | 0     | 0,008 | 1 |
| Ckmt1     | 0,031814 | -0,0084  | 0     | 0,008 | 1 |
| Ctxn2     | 0,031814 | -0,0084  | 0     | 0,008 | 1 |
| Bpifb4    | 0,031814 | -0,0084  | 0     | 0,008 | 1 |
| Pltp      | 0,031814 | -0,0084  | 0     | 0,008 | 1 |
| Btk       | 0,031814 | -0,0084  | 0     | 0,008 | 1 |
| Scml2     | 0,031814 | -0,0084  | 0     | 0,008 | 1 |
| 1110032FC | 0,031814 | -0,0084  | 0     | 0,008 | 1 |
| Gm42812   | 0,031814 | -0,0084  | 0     | 0,008 | 1 |
| Gm43240   | 0,031814 | -0,0084  | 0     | 0,008 | 1 |
| Hes3      | 0,031814 | -0,0084  | 0     | 0,008 | 1 |
| Adcyap1r1 | 0,031814 | -0,0084  | 0     | 0,008 | 1 |
| Oscar     | 0,031814 | -0,0084  | 0     | 0,008 | 1 |
| Pglyrp1   | 0,031814 | -0,0084  | 0     | 0,008 | 1 |
| Axl       | 0,031814 | -0,0084  | 0     | 0,008 | 1 |
| Upk1a     | 0,031814 | -0,0084  | 0     | 0,008 | 1 |
| Gm17102   | 0,031814 | -0,0084  | 0     | 0,008 | 1 |

|            |          |          |       |       |   |
|------------|----------|----------|-------|-------|---|
| Olf691     | 0,031814 | -0,0084  | 0     | 0,008 | 1 |
| Cpxm2      | 0,031814 | -0,0084  | 0     | 0,008 | 1 |
| Stk32c     | 0,031814 | -0,0084  | 0     | 0,008 | 1 |
| Gm31793    | 0,031814 | -0,0084  | 0     | 0,008 | 1 |
| Zfp791     | 0,031814 | -0,0084  | 0     | 0,008 | 1 |
| Gm45639    | 0,031814 | -0,0084  | 0     | 0,008 | 1 |
| Calb2      | 0,031814 | -0,0084  | 0     | 0,008 | 1 |
| Pstpip1    | 0,031814 | -0,0084  | 0     | 0,008 | 1 |
| Gm36278    | 0,031814 | -0,0084  | 0     | 0,008 | 1 |
| Arpp21     | 0,031814 | -0,0084  | 0     | 0,008 | 1 |
| Vstm2a     | 0,031814 | -0,0084  | 0     | 0,008 | 1 |
| Rab11fip4c | 0,031814 | -0,0084  | 0     | 0,008 | 1 |
| Zfp652os   | 0,031814 | -0,0084  | 0     | 0,008 | 1 |
| Hoxb6      | 0,031814 | -0,0084  | 0     | 0,008 | 1 |
| Igfbp4     | 0,031814 | -0,0084  | 0     | 0,008 | 1 |
| Hist1h3e   | 0,031814 | -0,0084  | 0     | 0,008 | 1 |
| Gm2762     | 0,031814 | -0,0084  | 0     | 0,008 | 1 |
| Cartpt     | 0,031814 | -0,0084  | 0     | 0,008 | 1 |
| AC133868.  | 0,031814 | -0,0084  | 0     | 0,008 | 1 |
| Rit2       | 0,031814 | -0,0084  | 0     | 0,008 | 1 |
| Fads2      | 0,031814 | -0,0084  | 0     | 0,008 | 1 |
| Bdnf       | 0,031814 | -0,01049 | 0     | 0,008 | 1 |
| Slc32a1    | 0,031814 | -0,01049 | 0     | 0,008 | 1 |
| Ankrd6     | 0,031814 | -0,01049 | 0     | 0,008 | 1 |
| Slc6a11    | 0,031814 | -0,01049 | 0     | 0,008 | 1 |
| Pla2g4c    | 0,031814 | -0,01049 | 0     | 0,008 | 1 |
| Cdiptos    | 0,031814 | -0,01049 | 0     | 0,008 | 1 |
| Cnmd       | 0,031814 | -0,01049 | 0     | 0,008 | 1 |
| Gm48393    | 0,031814 | -0,01049 | 0     | 0,008 | 1 |
| Gria1      | 0,031814 | -0,01049 | 0     | 0,008 | 1 |
| Retn       | 0,031814 | -0,01258 | 0     | 0,008 | 1 |
| Gm15938    | 0,031814 | -0,01258 | 0     | 0,008 | 1 |
| Svep1      | 0,031814 | -0,01258 | 0     | 0,008 | 1 |
| Map2k7     | 0,031841 | -0,02218 | 0,459 | 0,572 | 1 |
| Gm32051    | 0,031878 | 0,055797 | 0,033 | 0,013 | 1 |
| C530008M   | 0,031949 | -0,07158 | 0,193 | 0,251 | 1 |
| Sarnp      | 0,031966 | -0,04629 | 0,561 | 0,654 | 1 |
| Dph6       | 0,031972 | -0,03595 | 0,132 | 0,184 | 1 |
| Amt        | 0,032131 | -0,03384 | 0,061 | 0,097 | 1 |
| Rap1b      | 0,032155 | -0,02594 | 0,519 | 0,624 | 1 |
| Cc2d2a     | 0,03217  | -0,03044 | 0,171 | 0,228 | 1 |
| Spop       | 0,032193 | 0,082756 | 0,802 | 0,743 | 1 |
| Lipo3      | 0,032277 | -0,01962 | 0,042 | 0,074 | 1 |
| Paxbp1     | 0,032278 | -0,02065 | 0,332 | 0,416 | 1 |
| Gzf1       | 0,032281 | -0,01865 | 0,171 | 0,23  | 1 |
| Setd2      | 0,032295 | 0,134858 | 0,578 | 0,551 | 1 |
| Gps2       | 0,032308 | -0,03109 | 0,439 | 0,536 | 1 |
| C330011M   | 0,032314 | 0,025044 | 0,015 | 0,002 | 1 |
| Ppp2r1a    | 0,032328 | -0,07278 | 0,844 | 0,865 | 1 |
| Cav2       | 0,032355 | -0,10251 | 0,182 | 0,232 | 1 |
| Kif7       | 0,032362 | 0,028435 | 0,033 | 0,013 | 1 |
| Gm31763    | 0,032367 | 0,019672 | 0,015 | 0,002 | 1 |

|          |          |          |       |       |   |
|----------|----------|----------|-------|-------|---|
| Sertad4  | 0,032367 | 0,028609 | 0,015 | 0,002 | 1 |
| 49334040 | 0,032368 | -0,0218  | 0,072 | 0,112 | 1 |
| Plpp7    | 0,032382 | -0,03334 | 0,143 | 0,196 | 1 |
| 5730480H | 0,032397 | -0,03245 | 0,125 | 0,175 | 1 |
| Gm15582  | 0,03242  | 0,023256 | 0,015 | 0,002 | 1 |
| Gm43738  | 0,032473 | 0,016075 | 0,015 | 0,002 | 1 |
| Mettl27  | 0,032473 | 0,016075 | 0,015 | 0,002 | 1 |
| Klf5     | 0,032473 | 0,016075 | 0,015 | 0,002 | 1 |
| Zfp473   | 0,032473 | 0,026828 | 0,015 | 0,002 | 1 |
| Ctla2a   | 0,032473 | 0,023256 | 0,015 | 0,002 | 1 |
| St14     | 0,032473 | 0,017875 | 0,015 | 0,002 | 1 |
| Ogg1     | 0,032499 | -0,03514 | 0,095 | 0,139 | 1 |
| Gm7276   | 0,032526 | 0,014271 | 0,015 | 0,002 | 1 |
| Trrap    | 0,032544 | 0,086052 | 0,424 | 0,363 | 1 |
| Recql    | 0,032706 | -0,03796 | 0,161 | 0,217 | 1 |
| Hcfc1r1  | 0,032751 | -0,04517 | 0,776 | 0,848 | 1 |
| Thumpd2  | 0,032764 | -0,0218  | 0,031 | 0,059 | 1 |
| Ccsap    | 0,03282  | -0,03136 | 0,064 | 0,101 | 1 |
| Pum1     | 0,032835 | 0,105082 | 0,782 | 0,766 | 1 |
| Rep15    | 0,032865 | 0,036246 | 0,057 | 0,03  | 1 |
| Rbbp6    | 0,032886 | 0,153322 | 0,703 | 0,686 | 1 |
| Krtcap2  | 0,032921 | -0,04373 | 0,796 | 0,85  | 1 |
| Uqcrc1   | 0,032923 | -0,04211 | 0,793 | 0,842 | 1 |
| Kdm1a    | 0,032926 | -0,03271 | 0,457 | 0,559 | 1 |
| Gsta4    | 0,032931 | -0,02134 | 0,004 | 0,017 | 1 |
| Gm16240  | 0,032935 | 0,041023 | 0,042 | 0,019 | 1 |
| Ahnak2   | 0,032957 | 0,02138  | 0,015 | 0,002 | 1 |
| Cebpb    | 0,032958 | 0,07288  | 0,217 | 0,165 | 1 |
| Sik1     | 0,032971 | 0,035917 | 0,057 | 0,03  | 1 |
| B3gnt4   | 0,033033 | -0,01307 | 0,004 | 0,017 | 1 |
| Dyx1c1   | 0,033033 | -0,01307 | 0,004 | 0,017 | 1 |
| AU019823 | 0,033079 | -0,04603 | 0,253 | 0,321 | 1 |
| Mtpap    | 0,033115 | -0,04356 | 0,24  | 0,306 | 1 |
| Gm26843  | 0,033207 | -0,02292 | 0,017 | 0,038 | 1 |
| Mbd4     | 0,033218 | -0,02369 | 0,059 | 0,095 | 1 |
| Atf6b    | 0,03327  | -0,02209 | 0,363 | 0,456 | 1 |
| Adnp     | 0,033309 | -0,02942 | 0,09  | 0,133 | 1 |
| Tmem17   | 0,033334 | -0,03384 | 0,066 | 0,103 | 1 |
| Traf3ip2 | 0,033344 | -0,01332 | 0,004 | 0,017 | 1 |
| Usp20    | 0,033384 | -0,04067 | 0,178 | 0,236 | 1 |
| Tdo2     | 0,033409 | -0,0218  | 0,031 | 0,059 | 1 |
| Insc     | 0,033434 | 0,122671 | 0,844 | 0,859 | 1 |
| Gm26668  | 0,033447 | -0,01125 | 0,004 | 0,017 | 1 |
| Rictor   | 0,033462 | 0,122114 | 0,58  | 0,57  | 1 |
| Samd8    | 0,033467 | 0,099702 | 0,769 | 0,755 | 1 |
| Fntb     | 0,033477 | -0,09068 | 0,339 | 0,407 | 1 |
| Ddx23    | 0,033492 | -0,01459 | 0,246 | 0,323 | 1 |
| Kctd2    | 0,033507 | -0,06006 | 0,583 | 0,66  | 1 |
| Ift52    | 0,033564 | -0,01326 | 0,194 | 0,262 | 1 |
| Gm17705  | 0,033582 | -0,01816 | 0,011 | 0,03  | 1 |
| Cutc     | 0,033664 | -0,03136 | 0,064 | 0,101 | 1 |
| Eef1g    | 0,033714 | 0,106542 | 0,888 | 0,869 | 1 |



|           |          |          |       |       |   |
|-----------|----------|----------|-------|-------|---|
| Rpl11     | 0,033717 | -0,023   | 0,994 | 0,989 | 1 |
| Epha4     | 0,033738 | -0,03224 | 0,213 | 0,278 | 1 |
| Nup98     | 0,033774 | 0,140174 | 0,446 | 0,416 | 1 |
| Rnf38     | 0,033798 | 0,120836 | 0,328 | 0,289 | 1 |
| Tmem39a   | 0,033831 | -0,03343 | 0,211 | 0,276 | 1 |
| Tigd3     | 0,033866 | -0,00942 | 0,004 | 0,017 | 1 |
| 4930513D  | 0,033866 | -0,00397 | 0,004 | 0,017 | 1 |
| Sowaha    | 0,033871 | -0,04288 | 0,25  | 0,319 | 1 |
| Mbd1      | 0,033885 | -0,04187 | 0,226 | 0,289 | 1 |
| Pi4k2b    | 0,033939 | -0,02039 | 0,103 | 0,15  | 1 |
| Plekhg2   | 0,034012 | 0,058089 | 0,048 | 0,023 | 1 |
| Twf2      | 0,034084 | -0,04008 | 0,24  | 0,302 | 1 |
| Mcm4      | 0,034091 | -0,02923 | 0,178 | 0,238 | 1 |
| Wdr95     | 0,034106 | -0,01635 | 0,011 | 0,03  | 1 |
| B230317F2 | 0,034185 | -0,01863 | 0,011 | 0,03  | 1 |
| Vapb      | 0,034194 | -0,03134 | 0,538 | 0,65  | 1 |
| B4galt6   | 0,034206 | -0,04771 | 0,125 | 0,173 | 1 |
| Tmem196   | 0,034276 | -0,02359 | 0,017 | 0,038 | 1 |
| Prkaca    | 0,034326 | -0,04724 | 0,516 | 0,61  | 1 |
| Stard7    | 0,034345 | -0,01929 | 0,402 | 0,504 | 1 |
| Golga3    | 0,034401 | -0,01892 | 0,284 | 0,363 | 1 |
| Rcor3     | 0,034425 | 0,131465 | 0,514 | 0,5   | 1 |
| Rpl28     | 0,034458 | -0,03668 | 1     | 0,998 | 1 |
| 4932422M  | 0,034461 | -0,00411 | 0,051 | 0,086 | 1 |
| Atp6v0e2  | 0,034566 | -0,0554  | 0,864 | 0,876 | 1 |
| Rab14     | 0,034643 | -0,03196 | 0,989 | 0,987 | 1 |
| Aspscr1   | 0,034648 | -0,03422 | 0,371 | 0,451 | 1 |
| Capza2    | 0,034698 | -0,03876 | 0,828 | 0,88  | 1 |
| Gm15545   | 0,034701 | -0,02246 | 0,024 | 0,049 | 1 |
| Kcnk2     | 0,034719 | 0,03544  | 0,029 | 0,011 | 1 |
| Baz1b     | 0,03478  | 0,125409 | 0,662 | 0,66  | 1 |
| Zbtb24    | 0,034787 | -0,03458 | 0,117 | 0,165 | 1 |
| Zfp597    | 0,034833 | -0,02319 | 0,11  | 0,158 | 1 |
| Slc25a44  | 0,034916 | -0,02253 | 0,341 | 0,426 | 1 |
| Zmynd8    | 0,034936 | -0,05906 | 0,716 | 0,793 | 1 |
| Nsd1      | 0,034955 | 0,089201 | 0,69  | 0,688 | 1 |
| Homer3    | 0,034972 | -0,03332 | 0,268 | 0,338 | 1 |
| Pdcl      | 0,035017 | -0,03494 | 0,286 | 0,359 | 1 |
| Metap1d   | 0,035035 | -0,05123 | 0,382 | 0,464 | 1 |
| Brox      | 0,035038 | 0,095442 | 0,481 | 0,454 | 1 |
| Unc79     | 0,035174 | -0,01273 | 0,011 | 0,03  | 1 |
| Rpl26     | 0,03521  | 0,095549 | 0,994 | 0,996 | 1 |
| Lpcat1    | 0,035225 | 0,077166 | 0,154 | 0,112 | 1 |
| Tamm41    | 0,035287 | -0,02835 | 0,07  | 0,108 | 1 |
| Zeb2os    | 0,035332 | -0,038   | 0,211 | 0,272 | 1 |
| Exoc7     | 0,035388 | -0,03559 | 0,411 | 0,506 | 1 |
| Gm7467    | 0,03544  | -0,02645 | 0,062 | 0,099 | 1 |
| Ccdc134   | 0,035454 | -0,02743 | 0,132 | 0,184 | 1 |
| Ccdc148   | 0,035484 | 0,090145 | 0,117 | 0,08  | 1 |
| Atg5      | 0,035487 | -0,02762 | 0,237 | 0,304 | 1 |
| Tfap4     | 0,035504 | -0,031   | 0,114 | 0,16  | 1 |
| Srrt      | 0,035509 | -0,02208 | 0,38  | 0,475 | 1 |

|           |          |          |       |       |   |
|-----------|----------|----------|-------|-------|---|
| Rps6kl1   | 0,035659 | -0,02671 | 0,094 | 0,137 | 1 |
| Hdac10    | 0,035666 | -0,03583 | 0,114 | 0,16  | 1 |
| Heatr6    | 0,035723 | -0,01139 | 0,259 | 0,335 | 1 |
| Syngn3    | 0,035744 | -0,01868 | 0,024 | 0,049 | 1 |
| Btbd3     | 0,035818 | -0,04022 | 0,319 | 0,395 | 1 |
| Sfpq      | 0,03585  | 0,110098 | 0,965 | 0,954 | 1 |
| Abl2      | 0,035861 | 0,10004  | 0,275 | 0,224 | 1 |
| Mettl5os  | 0,035879 | -0,01769 | 0,007 | 0,023 | 1 |
| Gm21671   | 0,035879 | -0,01769 | 0,007 | 0,023 | 1 |
| Gm21814   | 0,035879 | -0,01769 | 0,007 | 0,023 | 1 |
| Fam169a   | 0,035879 | -0,01974 | 0,007 | 0,023 | 1 |
| Ik        | 0,036068 | -0,03893 | 0,756 | 0,827 | 1 |
| Klf2      | 0,036082 | 0,003913 | 0,029 | 0,011 | 1 |
| Appl1     | 0,036094 | 0,10172  | 0,688 | 0,681 | 1 |
| Slc35c1   | 0,036155 | -0,02455 | 0,064 | 0,101 | 1 |
| Kbtbd8    | 0,03617  | -0,02266 | 0,048 | 0,08  | 1 |
| Bhlhb9    | 0,036198 | -0,01792 | 0,007 | 0,023 | 1 |
| Cd274     | 0,036208 | 0,057281 | 0,026 | 0,008 | 1 |
| Tmem25    | 0,036246 | -0,02805 | 0,051 | 0,084 | 1 |
| Abcc5     | 0,036308 | -0,02589 | 0,694 | 0,789 | 1 |
| Ccdc71    | 0,036315 | -0,03076 | 0,103 | 0,148 | 1 |
| Zufsp     | 0,036331 | -0,02298 | 0,235 | 0,302 | 1 |
| Ggnbp1    | 0,036492 | -0,02592 | 0,088 | 0,131 | 1 |
| Epop      | 0,03654  | 0,025865 | 0,026 | 0,008 | 1 |
| Hist1h3d  | 0,036562 | -0,01381 | 0,007 | 0,023 | 1 |
| Zfp41     | 0,036606 | -0,04488 | 0,154 | 0,207 | 1 |
| Gm37756   | 0,036747 | 0,009132 | 0,009 | 0     | 1 |
| Gssos2    | 0,036747 | 0,009132 | 0,009 | 0     | 1 |
| Cfap46    | 0,036747 | 0,009132 | 0,009 | 0     | 1 |
| Gm31805   | 0,036747 | 0,009132 | 0,009 | 0     | 1 |
| Gramd2    | 0,036747 | 0,009132 | 0,009 | 0     | 1 |
| Gm34923   | 0,036747 | 0,009132 | 0,009 | 0     | 1 |
| Ckap4     | 0,036747 | 0,012762 | 0,009 | 0     | 1 |
| 1110017D  | 0,036747 | 0,010949 | 0,009 | 0     | 1 |
| Ticrr     | 0,036747 | 0,010949 | 0,009 | 0     | 1 |
| Utf1      | 0,036747 | 0,010949 | 0,009 | 0     | 1 |
| Tshr      | 0,036747 | 0,010949 | 0,009 | 0     | 1 |
| Msh5      | 0,036747 | 0,010949 | 0,009 | 0     | 1 |
| Hrasls5   | 0,036747 | 0,010949 | 0,009 | 0     | 1 |
| Gm28609   | 0,036748 | 0,012762 | 0,009 | 0     | 1 |
| Hvcn1     | 0,036748 | 0,012762 | 0,009 | 0     | 1 |
| Vmn1r43   | 0,036748 | 0,012762 | 0,009 | 0     | 1 |
| Ephb3     | 0,036748 | 0,012762 | 0,009 | 0     | 1 |
| Gm47316   | 0,036748 | 0,014572 | 0,009 | 0     | 1 |
| Nanos1    | 0,036748 | 0,016379 | 0,009 | 0     | 1 |
| Gfra2     | 0,036748 | 0,021779 | 0,009 | 0     | 1 |
| Parp14    | 0,036748 | 0,028935 | 0,009 | 0     | 1 |
| 4930589L2 | 0,036768 | 0,031829 | 0,018 | 0,004 | 1 |
| Mettl9    | 0,036768 | -0,03807 | 0,549 | 0,65  | 1 |
| Gmppb     | 0,036769 | -0,02826 | 0,112 | 0,158 | 1 |
| Brd3os    | 0,036772 | -0,02003 | 0,035 | 0,063 | 1 |
| Fancc     | 0,036784 | -0,04232 | 0,182 | 0,236 | 1 |

|           |          |          |       |       |   |
|-----------|----------|----------|-------|-------|---|
| Acvr2b    | 0,036812 | -0,03551 | 0,204 | 0,264 | 1 |
| Unc45a    | 0,036899 | 0,090129 | 0,233 | 0,188 | 1 |
| Zbed5     | 0,036908 | -0,02351 | 0,051 | 0,084 | 1 |
| Tle1      | 0,036923 | -0,02299 | 0,481 | 0,586 | 1 |
| Ssr1      | 0,036957 | 0,090308 | 0,965 | 0,939 | 1 |
| Itga9     | 0,036969 | -0,0149  | 0,002 | 0,013 | 1 |
| Gm597     | 0,036969 | -0,01698 | 0,002 | 0,013 | 1 |
| Gm16033   | 0,036973 | 0,017569 | 0,018 | 0,004 | 1 |
| Galnt13   | 0,037036 | -0,01283 | 0,002 | 0,013 | 1 |
| Gm19265   | 0,037036 | -0,01283 | 0,002 | 0,013 | 1 |
| Pdzrn3    | 0,037036 | -0,01283 | 0,002 | 0,013 | 1 |
| Zpbp      | 0,037036 | -0,01283 | 0,002 | 0,013 | 1 |
| Gm26620   | 0,037036 | -0,0149  | 0,002 | 0,013 | 1 |
| Pgm2l1    | 0,037047 | 0,077196 | 0,09  | 0,057 | 1 |
| Lnx2      | 0,037074 | 0,033264 | 0,022 | 0,006 | 1 |
| R3hdm1    | 0,037101 | -0,06652 | 0,774 | 0,835 | 1 |
| 31100790  | 0,037103 | -0,01075 | 0,002 | 0,013 | 1 |
| Gm13373   | 0,037103 | -0,01075 | 0,002 | 0,013 | 1 |
| Cp        | 0,037103 | -0,01075 | 0,002 | 0,013 | 1 |
| Kcnd2     | 0,037103 | -0,01075 | 0,002 | 0,013 | 1 |
| Gm21284   | 0,037103 | -0,01075 | 0,002 | 0,013 | 1 |
| Trhde     | 0,037103 | -0,01075 | 0,002 | 0,013 | 1 |
| Gm10647   | 0,037103 | -0,01075 | 0,002 | 0,013 | 1 |
| Ahrr      | 0,037103 | -0,01075 | 0,002 | 0,013 | 1 |
| Vcpi1     | 0,037157 | -0,03554 | 0,341 | 0,416 | 1 |
| Olfr259   | 0,037179 | 0,013972 | 0,018 | 0,004 | 1 |
| Pcmt2     | 0,037189 | 0,014195 | 0,345 | 0,456 | 1 |
| Hist2h3c2 | 0,037199 | -0,02315 | 0,018 | 0,04  | 1 |
| Prdm4     | 0,037204 | -0,02566 | 0,105 | 0,15  | 1 |
| Lrp4      | 0,037219 | 0,050974 | 0,235 | 0,179 | 1 |
| Tyk2      | 0,03723  | -0,02883 | 0,105 | 0,15  | 1 |
| Jmjd6     | 0,037325 | -0,01605 | 0,389 | 0,489 | 1 |
| Ptn       | 0,037332 | 0,074283 | 0,98  | 0,947 | 1 |
| Rbm33     | 0,037407 | -0,01596 | 0,352 | 0,437 | 1 |
| Rnf126    | 0,037438 | -0,02843 | 0,332 | 0,409 | 1 |
| Ttll9     | 0,037444 | -0,011   | 0,002 | 0,013 | 1 |
| Capn7     | 0,037516 | -0,04299 | 0,222 | 0,285 | 1 |
| Pde7a     | 0,037523 | -0,0501  | 0,207 | 0,264 | 1 |
| Zfr       | 0,037557 | 0,102294 | 0,85  | 0,825 | 1 |
| 4930403P  | 0,037633 | 0,022626 | 0,022 | 0,006 | 1 |
| Gm14698   | 0,037656 | 0,039002 | 0,064 | 0,036 | 1 |
| Sowahc    | 0,037736 | 0,089304 | 0,202 | 0,158 | 1 |
| Prpf38a   | 0,037801 | -0,03125 | 0,279 | 0,35  | 1 |
| Zscan21   | 0,037814 | -0,02883 | 0,11  | 0,156 | 1 |
| Lym7      | 0,037861 | -0,02026 | 0,035 | 0,063 | 1 |
| Casp7     | 0,037915 | 0,019055 | 0,022 | 0,006 | 1 |
| Hspbap1   | 0,037977 | -0,03309 | 0,077 | 0,116 | 1 |
| Rsf1      | 0,038005 | 0,103774 | 0,76  | 0,738 | 1 |
| Arid1b    | 0,038024 | 0,120597 | 0,473 | 0,454 | 1 |
| Pfas      | 0,038089 | -0,03672 | 0,174 | 0,23  | 1 |
| Rps27     | 0,038124 | -0,01825 | 0,996 | 0,996 | 1 |
| Rnase1    | 0,03818  | 0,009489 | 0,018 | 0,004 | 1 |

|           |          |          |       |       |   |
|-----------|----------|----------|-------|-------|---|
| Prpf38b   | 0,03832  | 0,115641 | 0,657 | 0,639 | 1 |
| Dhx36     | 0,038323 | -0,04548 | 0,734 | 0,821 | 1 |
| Ddx39     | 0,038339 | -0,03002 | 0,141 | 0,192 | 1 |
| Eps8      | 0,038445 | -0,02857 | 0,013 | 0,032 | 1 |
| Aff4      | 0,038496 | 0,118614 | 0,706 | 0,738 | 1 |
| Spns2     | 0,038525 | -0,01208 | 0,538 | 0,652 | 1 |
| Utp6      | 0,038588 | -0,02779 | 0,248 | 0,314 | 1 |
| Rpia      | 0,038589 | -0,00868 | 0,255 | 0,335 | 1 |
| Znhit6    | 0,038591 | -0,02057 | 0,24  | 0,306 | 1 |
| Dgcr8     | 0,038601 | -0,0349  | 0,16  | 0,213 | 1 |
| Fgd6      | 0,038628 | -0,02476 | 0,068 | 0,105 | 1 |
| Gm21781   | 0,038671 | -0,01713 | 0,026 | 0,051 | 1 |
| Acad10    | 0,038722 | -0,02451 | 0,013 | 0,032 | 1 |
| Gm16861   | 0,038722 | -0,02451 | 0,013 | 0,032 | 1 |
| Rin1      | 0,038742 | 0,076216 | 0,117 | 0,08  | 1 |
| Zbtb45    | 0,038785 | -0,03661 | 0,094 | 0,135 | 1 |
| B3galt1   | 0,038808 | -0,03587 | 0,169 | 0,224 | 1 |
| Fbrsl1    | 0,038874 | -0,04025 | 0,218 | 0,276 | 1 |
| Anp32a    | 0,038922 | -0,03617 | 0,717 | 0,793 | 1 |
| Rab11a    | 0,038955 | -0,0524  | 0,582 | 0,656 | 1 |
| Grk4      | 0,038997 | -0,02865 | 0,073 | 0,112 | 1 |
| Gfm2      | 0,039    | -0,03916 | 0,125 | 0,171 | 1 |
| Ankib1    | 0,039016 | 0,076517 | 0,811 | 0,781 | 1 |
| Tspyl4    | 0,039047 | -0,05782 | 0,679 | 0,755 | 1 |
| Msl1      | 0,039248 | 0,123654 | 0,499 | 0,485 | 1 |
| Eef2kmt   | 0,039248 | -0,02375 | 0,134 | 0,184 | 1 |
| Huwe1     | 0,039267 | 0,093825 | 0,831 | 0,804 | 1 |
| Srsf1     | 0,039276 | 0,104431 | 0,635 | 0,624 | 1 |
| Abi2      | 0,039396 | 0,122954 | 0,594 | 0,593 | 1 |
| 4930503L1 | 0,039533 | -0,03709 | 0,163 | 0,217 | 1 |
| Fam212a   | 0,03955  | -0,02068 | 0,028 | 0,053 | 1 |
| Mef2b     | 0,039568 | -0,02878 | 0,013 | 0,032 | 1 |
| 5730455P: | 0,039655 | -0,01555 | 0,411 | 0,513 | 1 |
| Dgki      | 0,039695 | -0,04762 | 0,266 | 0,331 | 1 |
| Atat1     | 0,03972  | -0,0435  | 0,578 | 0,656 | 1 |
| Tasp1     | 0,039729 | -0,02114 | 0,039 | 0,068 | 1 |
| Sclt1     | 0,039764 | -0,0198  | 0,185 | 0,245 | 1 |
| Fsd1l     | 0,039805 | -0,01883 | 0,517 | 0,614 | 1 |
| Srp72     | 0,039831 | -0,03042 | 0,503 | 0,599 | 1 |
| Stk10     | 0,039965 | -0,0218  | 0,072 | 0,11  | 1 |
| Fbxo25    | 0,040073 | -0,0263  | 0,327 | 0,401 | 1 |
| Taf8      | 0,040108 | -0,02733 | 0,132 | 0,181 | 1 |
| Cct7      | 0,040142 | -0,05958 | 0,901 | 0,924 | 1 |
| Dolk      | 0,040167 | -0,02372 | 0,24  | 0,306 | 1 |
| Gm26670   | 0,040178 | -0,01658 | 0,013 | 0,032 | 1 |
| Fam205a1  | 0,040178 | -0,01658 | 0,013 | 0,032 | 1 |
| Lrrc40    | 0,040193 | -0,03532 | 0,099 | 0,141 | 1 |
| Gm47689   | 0,040205 | -0,01037 | 0,018 | 0,04  | 1 |
| Abcb9     | 0,040235 | -0,02855 | 0,097 | 0,139 | 1 |
| Gm47059   | 0,04039  | -0,01525 | 0,013 | 0,032 | 1 |
| Aarsd1    | 0,040417 | -0,03108 | 0,092 | 0,133 | 1 |
| Lrba      | 0,04044  | 0,101202 | 0,215 | 0,173 | 1 |

|           |          |          |       |       |   |
|-----------|----------|----------|-------|-------|---|
| Calcoco1  | 0,040448 | -0,02011 | 0,338 | 0,424 | 1 |
| Banf2os   | 0,040523 | -0,0376  | 0,02  | 0,042 | 1 |
| Entpd6    | 0,04054  | -0,02845 | 0,057 | 0,091 | 1 |
| A930015Dl | 0,040554 | -0,01322 | 0,013 | 0,032 | 1 |
| Pdap1     | 0,040638 | -0,03576 | 0,87  | 0,903 | 1 |
| Mxd4      | 0,04064  | 0,10372  | 0,818 | 0,81  | 1 |
| Upf1      | 0,04064  | -0,03071 | 0,428 | 0,525 | 1 |
| Nxpe4     | 0,0407   | -0,03495 | 0,088 | 0,129 | 1 |
| Taf3      | 0,040703 | -0,03106 | 0,339 | 0,42  | 1 |
| Gnl1      | 0,040743 | -0,01859 | 0,209 | 0,272 | 1 |
| Txnrd1    | 0,040755 | -0,01103 | 0,336 | 0,422 | 1 |
| Msh3      | 0,040772 | -0,02053 | 0,29  | 0,363 | 1 |
| Zfand2b   | 0,040779 | -0,02874 | 0,288 | 0,357 | 1 |
| Tmem42    | 0,040791 | -0,05161 | 0,182 | 0,234 | 1 |
| Mmgt2     | 0,040794 | 0,037575 | 0,044 | 0,021 | 1 |
| Lhpp      | 0,04088  | -0,02369 | 0,072 | 0,11  | 1 |
| Gm10277   | 0,040891 | -0,03031 | 0,042 | 0,072 | 1 |
| Gm45768   | 0,040983 | 0,132205 | 0,525 | 0,515 | 1 |
| Larp1b    | 0,041072 | -0,0527  | 0,217 | 0,272 | 1 |
| Ell       | 0,041108 | -0,02746 | 0,167 | 0,222 | 1 |
| Dynlt1f   | 0,041113 | -0,03247 | 0,042 | 0,072 | 1 |
| Smurf2    | 0,041191 | -0,02148 | 0,283 | 0,357 | 1 |
| Ogdh      | 0,041194 | 0,096865 | 0,657 | 0,66  | 1 |
| Prkag1    | 0,041234 | -0,03618 | 0,336 | 0,416 | 1 |
| 4930480K  | 0,041271 | -0,0231  | 0,04  | 0,07  | 1 |
| Dclk2     | 0,041294 | 0,057201 | 0,117 | 0,08  | 1 |
| 4833439L1 | 0,041402 | -0,05961 | 0,635 | 0,7   | 1 |
| Irf3      | 0,041456 | -0,00994 | 0,308 | 0,399 | 1 |
| Trim47    | 0,041561 | 0,053396 | 0,072 | 0,042 | 1 |
| Tceal3    | 0,041569 | 0,001909 | 0,145 | 0,2   | 1 |
| Iqce      | 0,041668 | -0,03221 | 0,097 | 0,139 | 1 |
| Slc35e2   | 0,04168  | -0,02216 | 0,191 | 0,251 | 1 |
| Zfp763    | 0,041689 | -0,02304 | 0,079 | 0,118 | 1 |
| Vangl1    | 0,041692 | -0,02116 | 0,053 | 0,086 | 1 |
| Ubqln2    | 0,041738 | -0,0391  | 0,695 | 0,778 | 1 |
| Ciart     | 0,041772 | -0,01972 | 0,079 | 0,118 | 1 |
| Fktn      | 0,041817 | -0,04741 | 0,716 | 0,77  | 1 |
| Ppm1d     | 0,04182  | -0,01207 | 0,224 | 0,289 | 1 |
| Plpp5     | 0,041921 | -0,0249  | 0,029 | 0,055 | 1 |
| Ppl       | 0,041956 | 0,05742  | 0,061 | 0,034 | 1 |
| Sema5a    | 0,04196  | 0,191179 | 0,31  | 0,266 | 1 |
| Tomm70a   | 0,042222 | -0,01216 | 0,382 | 0,485 | 1 |
| Mfsd4a    | 0,042322 | -0,03762 | 0,114 | 0,158 | 1 |
| A830019P  | 0,042372 | 0,027794 | 0,035 | 0,015 | 1 |
| Aph1a     | 0,04251  | -0,04233 | 0,65  | 0,759 | 1 |
| Rnaseh2a  | 0,042521 | -0,02756 | 0,178 | 0,236 | 1 |
| Gm14412   | 0,042554 | -0,01759 | 0,028 | 0,053 | 1 |
| Map3k10   | 0,042624 | -0,04217 | 0,185 | 0,238 | 1 |
| Zfp131    | 0,042651 | -0,01087 | 0,328 | 0,418 | 1 |
| Ak6       | 0,042658 | -0,0197  | 0,22  | 0,283 | 1 |
| Gm30122   | 0,04272  | -0,03106 | 0,031 | 0,057 | 1 |
| Med13     | 0,042768 | 0,111968 | 0,622 | 0,601 | 1 |

|           |          |          |       |       |   |
|-----------|----------|----------|-------|-------|---|
| Ddx51     | 0,042926 | -0,02755 | 0,061 | 0,095 | 1 |
| Nfe2l1    | 0,042991 | 0,093044 | 0,558 | 0,549 | 1 |
| Depdc5    | 0,042998 | -0,02662 | 0,262 | 0,333 | 1 |
| Amigo1    | 0,043043 | -0,02638 | 0,083 | 0,122 | 1 |
| BC048403  | 0,043077 | -0,02289 | 0,042 | 0,072 | 1 |
| Fam50a    | 0,043182 | -0,01519 | 0,35  | 0,437 | 1 |
| Mtor      | 0,043228 | -0,02737 | 0,24  | 0,304 | 1 |
| Flii      | 0,043265 | -0,03272 | 0,45  | 0,557 | 1 |
| Tango6    | 0,043308 | -0,02506 | 0,042 | 0,072 | 1 |
| Vps37c    | 0,043452 | -0,02559 | 0,253 | 0,321 | 1 |
| 2310035C: | 0,04347  | -0,02166 | 0,437 | 0,54  | 1 |
| Strada    | 0,043477 | -0,03492 | 0,139 | 0,188 | 1 |
| Soga1     | 0,043582 | -0,04253 | 0,207 | 0,264 | 1 |
| Hsp90b1   | 0,043653 | -0,04528 | 0,991 | 0,994 | 1 |
| Dnajc7    | 0,04371  | -0,03973 | 0,723 | 0,819 | 1 |
| Smarcad1  | 0,043716 | -0,00893 | 0,29  | 0,373 | 1 |
| Gm32036   | 0,043749 | -0,02777 | 0,09  | 0,131 | 1 |
| Guf1      | 0,043773 | -0,05271 | 0,152 | 0,2   | 1 |
| Gm37494   | 0,043776 | -0,04746 | 0,464 | 0,561 | 1 |
| Ints14    | 0,043887 | -0,02101 | 0,128 | 0,177 | 1 |
| Lonrf1    | 0,043909 | -0,02927 | 0,266 | 0,333 | 1 |
| D730003I1 | 0,043941 | -0,03169 | 0,209 | 0,268 | 1 |
| Cstf1     | 0,043996 | -0,00628 | 0,105 | 0,148 | 1 |
| Trmu      | 0,044218 | -0,03295 | 0,112 | 0,156 | 1 |
| Gm26737   | 0,044234 | -0,05059 | 0,009 | 0,025 | 1 |
| Ythdf1    | 0,044258 | -0,02678 | 0,35  | 0,432 | 1 |
| Gm38394   | 0,04434  | 0,036968 | 0,061 | 0,034 | 1 |
| BC051077  | 0,044362 | 0,054459 | 0,073 | 0,044 | 1 |
| Rps23     | 0,044364 | -0,01199 | 0,991 | 0,996 | 1 |
| Gm6563    | 0,04439  | -0,01239 | 0,02  | 0,042 | 1 |
| mt-Atp6   | 0,044442 | -0,03807 | 1     | 1     | 1 |
| Kctd7     | 0,044461 | -0,01906 | 0,193 | 0,253 | 1 |
| Slc35c2   | 0,044587 | -0,02311 | 0,169 | 0,224 | 1 |
| Usp53     | 0,044636 | 0,111736 | 0,268 | 0,224 | 1 |
| Klhl40    | 0,0447   | 0,05139  | 0,079 | 0,049 | 1 |
| Luc7l2    | 0,044734 | 0,062269 | 0,963 | 0,951 | 1 |
| Rsph9     | 0,044784 | 0,052441 | 0,073 | 0,044 | 1 |
| Ntm       | 0,044792 | -0,02021 | 0,009 | 0,025 | 1 |
| Fbxl15    | 0,044808 | -0,02487 | 0,095 | 0,137 | 1 |
| Itpr1     | 0,044838 | -0,03151 | 0,046 | 0,076 | 1 |
| Zfp712    | 0,044923 | -0,02332 | 0,044 | 0,074 | 1 |
| Epc1      | 0,044931 | 0,111857 | 0,58  | 0,58  | 1 |
| Kirrel2   | 0,044941 | -0,01587 | 0,009 | 0,025 | 1 |
| Rsph3b    | 0,044941 | -0,01587 | 0,009 | 0,025 | 1 |
| 29000110I | 0,044994 | -0,02066 | 0,015 | 0,034 | 1 |
| Podxl2    | 0,045001 | 0,045015 | 0,095 | 0,061 | 1 |
| Zfp704    | 0,045092 | 0,118153 | 0,583 | 0,574 | 1 |
| Pcdh9     | 0,045135 | -0,05872 | 0,993 | 0,998 | 1 |
| Ddx20     | 0,045139 | -0,03738 | 0,081 | 0,118 | 1 |
| Cdca4     | 0,045157 | -0,00883 | 0,02  | 0,042 | 1 |
| E330034G: | 0,045253 | -0,01816 | 0,009 | 0,025 | 1 |
| Atxn1l    | 0,045314 | -0,02921 | 0,2   | 0,259 | 1 |

|           |          |          |       |       |   |
|-----------|----------|----------|-------|-------|---|
| Gm45051   | 0,045543 | -0,02    | 0,022 | 0,044 | 1 |
| Aqr       | 0,045554 | -0,01392 | 0,308 | 0,39  | 1 |
| Gm6598    | 0,045563 | -0,01405 | 0,009 | 0,025 | 1 |
| Spout1    | 0,045574 | -0,03612 | 0,233 | 0,293 | 1 |
| Thoc6     | 0,045582 | -0,01729 | 0,2   | 0,257 | 1 |
| Anapc2    | 0,045622 | 0,120328 | 0,62  | 0,618 | 1 |
| Srpk1     | 0,045628 | -0,02659 | 0,334 | 0,407 | 1 |
| Eif3f     | 0,045639 | -0,03356 | 0,833 | 0,888 | 1 |
| Ddx10     | 0,045647 | -0,01748 | 0,196 | 0,257 | 1 |
| Ccz1      | 0,045716 | 0,029044 | 0,488 | 0,582 | 1 |
| Samd4     | 0,045725 | -0,0322  | 0,345 | 0,416 | 1 |
| Ccar2     | 0,045729 | -0,03438 | 0,224 | 0,287 | 1 |
| Dpp9      | 0,045734 | -0,04025 | 0,215 | 0,272 | 1 |
| Ehbp1     | 0,045757 | 0,076397 | 0,2   | 0,156 | 1 |
| St3gal5   | 0,04583  | -0,03251 | 0,4   | 0,485 | 1 |
| Bace2     | 0,045999 | -0,0607  | 0,123 | 0,167 | 1 |
| Ehbp111   | 0,046008 | 0,028757 | 0,031 | 0,013 | 1 |
| Naif1     | 0,046047 | -0,01682 | 0,015 | 0,034 | 1 |
| Gm32926   | 0,046047 | -0,01682 | 0,015 | 0,034 | 1 |
| Tnfrsf21  | 0,046053 | -0,01909 | 0,015 | 0,034 | 1 |
| Dnaja1    | 0,046128 | 0,02033  | 0,958 | 0,958 | 1 |
| Faah      | 0,046203 | -0,07051 | 0,305 | 0,373 | 1 |
| Zfp362    | 0,046211 | -0,03032 | 0,121 | 0,167 | 1 |
| Rybp      | 0,046273 | -0,0509  | 0,523 | 0,603 | 1 |
| Kifc5b    | 0,046278 | 0,023461 | 0,031 | 0,013 | 1 |
| Tmem260   | 0,046298 | -0,02373 | 0,328 | 0,407 | 1 |
| Gm5602    | 0,0463   | -0,01454 | 0,009 | 0,025 | 1 |
| Pwwp2a    | 0,046319 | -0,04122 | 0,374 | 0,447 | 1 |
| Mafk      | 0,046322 | 0,10586  | 0,183 | 0,143 | 1 |
| Gfpt1     | 0,046331 | -0,01833 | 0,358 | 0,447 | 1 |
| Tyms      | 0,046407 | -0,01705 | 0,015 | 0,034 | 1 |
| Tbc1d14   | 0,046423 | -0,04483 | 0,631 | 0,747 | 1 |
| 311000112 | 0,046525 | 0,030321 | 0,04  | 0,019 | 1 |
| Dsn1      | 0,046577 | -0,01539 | 0,006 | 0,019 | 1 |
| Xrra1     | 0,046577 | -0,01539 | 0,006 | 0,019 | 1 |
| Atp6ap1   | 0,046629 | 0,061435 | 0,98  | 0,96  | 1 |
| Rbm3os    | 0,046764 | -0,01332 | 0,006 | 0,019 | 1 |
| Gm13205   | 0,046764 | -0,01332 | 0,006 | 0,019 | 1 |
| Lrrc46    | 0,046764 | -0,01332 | 0,006 | 0,019 | 1 |
| 2810049E  | 0,046764 | -0,01332 | 0,006 | 0,019 | 1 |
| Gm17111   | 0,046764 | -0,01332 | 0,006 | 0,019 | 1 |
| Txn1      | 0,046839 | 0,087479 | 0,683 | 0,658 | 1 |
| Rtn4ip1   | 0,046903 | -0,02393 | 0,064 | 0,099 | 1 |
| Asxl3     | 0,046912 | 0,012905 | 0,27  | 0,348 | 1 |
| Vhl       | 0,046947 | -0,02786 | 0,25  | 0,312 | 1 |
| Rbm38     | 0,046967 | 0,006653 | 0,031 | 0,013 | 1 |
| Ccdc24    | 0,047058 | -0,02396 | 0,046 | 0,076 | 1 |
| 17000010  | 0,047146 | -0,01356 | 0,006 | 0,019 | 1 |
| Rpl37a    | 0,047155 | -0,01727 | 0,998 | 0,994 | 1 |
| Syne1     | 0,047188 | -0,0125  | 0,138 | 0,19  | 1 |
| Galnt17   | 0,04721  | -0,01759 | 0,031 | 0,057 | 1 |
| Tmem120a  | 0,047235 | -0,01637 | 0,141 | 0,192 | 1 |

|          |          |          |       |       |   |
|----------|----------|----------|-------|-------|---|
| Atad2    | 0,04729  | 0,047212 | 0,11  | 0,074 | 1 |
| Shpk     | 0,047336 | -0,0115  | 0,006 | 0,019 | 1 |
| Pgf      | 0,047336 | -0,0115  | 0,006 | 0,019 | 1 |
| Dgke     | 0,047339 | -0,03195 | 0,134 | 0,181 | 1 |
| Cnm2     | 0,047508 | -0,02522 | 0,112 | 0,156 | 1 |
| Nkrf     | 0,047622 | -0,01543 | 0,059 | 0,093 | 1 |
| Utp15    | 0,047623 | -0,02908 | 0,156 | 0,207 | 1 |
| Klhdc8a  | 0,047667 | 0,157762 | 0,29  | 0,253 | 1 |
| Rplp1    | 0,04782  | -0,01825 | 1     | 0,998 | 1 |
| Fkbp1    | 0,047837 | -0,02625 | 0,07  | 0,105 | 1 |
| Mllt6    | 0,047969 | 0,133858 | 0,453 | 0,449 | 1 |
| Eya3     | 0,04801  | -0,02915 | 0,075 | 0,112 | 1 |
| Fbxl18   | 0,048068 | -0,0178  | 0,194 | 0,253 | 1 |
| Erlin1   | 0,048115 | -0,01637 | 0,046 | 0,076 | 1 |
| Rimk1a   | 0,04812  | -0,02157 | 0,033 | 0,059 | 1 |
| Snx7     | 0,048309 | -0,03915 | 0,101 | 0,141 | 1 |
| Rab4b    | 0,048331 | -0,02772 | 0,156 | 0,209 | 1 |
| Lgals2   | 0,048381 | -0,03127 | 0,084 | 0,122 | 1 |
| Bcr      | 0,048385 | -0,03688 | 0,178 | 0,23  | 1 |
| Dync1li1 | 0,048418 | -0,03783 | 0,415 | 0,502 | 1 |
| Ccdc138  | 0,048456 | 0,044425 | 0,068 | 0,04  | 1 |
| Ddhd2    | 0,048459 | -0,03367 | 0,481 | 0,572 | 1 |
| Ngfr     | 0,048572 | 0,109101 | 0,174 | 0,135 | 1 |
| Srd5a1   | 0,048725 | 0,132238 | 0,451 | 0,411 | 1 |
| Oscp1    | 0,048842 | -0,02028 | 0,048 | 0,078 | 1 |
| Eed      | 0,048844 | -0,01507 | 0,218 | 0,283 | 1 |
| Heg1     | 0,048849 | -0,0338  | 0,29  | 0,363 | 1 |
| Ring1    | 0,048886 | -0,00509 | 0,497 | 0,618 | 1 |
| Gpaa1    | 0,048923 | -0,01878 | 0,268 | 0,342 | 1 |
| Elf2     | 0,04906  | 0,098137 | 0,565 | 0,557 | 1 |
| Slc45a1  | 0,049147 | -0,01637 | 0,048 | 0,078 | 1 |
| Hmgcl1   | 0,049176 | 0,045422 | 0,068 | 0,04  | 1 |
| Zfp974   | 0,049179 | -0,02116 | 0,064 | 0,099 | 1 |
| Pcdhb14  | 0,049214 | 0,067823 | 0,114 | 0,078 | 1 |
| Rbm3     | 0,049276 | 0,101039 | 0,576 | 0,561 | 1 |
| Gm26881  | 0,049295 | -0,02978 | 0,053 | 0,084 | 1 |
| Tbc1d19  | 0,049323 | -0,01787 | 0,246 | 0,316 | 1 |
| Acsf3    | 0,049338 | -0,02243 | 0,068 | 0,103 | 1 |
| Adat1    | 0,049364 | -0,02527 | 0,099 | 0,141 | 1 |
| Adamts1  | 0,049524 | -0,01343 | 0,541 | 0,662 | 1 |
| Ogfr1    | 0,049535 | -0,01509 | 0,185 | 0,243 | 1 |
| Klhl15   | 0,04963  | -0,01921 | 0,193 | 0,251 | 1 |
| Camk2g   | 0,049651 | -0,03527 | 0,127 | 0,171 | 1 |
| Borcs6   | 0,049695 | -0,02466 | 0,317 | 0,39  | 1 |
| Plag1    | 0,04986  | -0,03255 | 0,086 | 0,124 | 1 |
| Sec23ip  | 0,04994  | -0,01227 | 0,29  | 0,365 | 1 |
| Mr1      | 0,049971 | 0,027315 | 0,028 | 0,011 | 1 |
| Alg8     | 0,05023  | -0,02266 | 0,053 | 0,084 | 1 |
| Tspan2os | 0,050382 | -0,01868 | 0,024 | 0,046 | 1 |
| Ddx19a   | 0,050408 | -0,01857 | 0,246 | 0,31  | 1 |
| Unc119b  | 0,050432 | -0,02865 | 0,084 | 0,122 | 1 |
| Tmem132t | 0,050489 | -0,04906 | 0,473 | 0,559 | 1 |



|          |          |          |       |       |   |
|----------|----------|----------|-------|-------|---|
| Chd1l    | 0,050554 | -0,02003 | 0,13  | 0,179 | 1 |
| Dynlt3   | 0,050595 | -0,04219 | 0,569 | 0,669 | 1 |
| Fam213b  | 0,050597 | -0,02857 | 0,339 | 0,414 | 1 |
| Edrf1    | 0,050637 | -0,01452 | 0,141 | 0,192 | 1 |
| Nmd3     | 0,050695 | -0,00796 | 0,171 | 0,228 | 1 |
| Zfp467   | 0,050738 | 0,074801 | 0,213 | 0,167 | 1 |
| Rsl1d1   | 0,050773 | -0,03519 | 0,53  | 0,618 | 1 |
| Figl2    | 0,050824 | -0,02112 | 0,017 | 0,036 | 1 |
| Morc3    | 0,050825 | -0,02072 | 0,206 | 0,266 | 1 |
| Fam161a  | 0,050839 | -0,02201 | 0,05  | 0,08  | 1 |
| Tcn2     | 0,050851 | -0,01078 | 0,25  | 0,319 | 1 |
| Prkca    | 0,050875 | -0,03909 | 0,651 | 0,734 | 1 |
| Wdr75    | 0,050902 | -0,02082 | 0,138 | 0,186 | 1 |
| Gins1    | 0,050917 | -0,01932 | 0,017 | 0,036 | 1 |
| Sema4b   | 0,051024 | 0,033134 | 0,051 | 0,027 | 1 |
| A030001D | 0,051252 | -0,03012 | 0,083 | 0,12  | 1 |
| Rfwd3    | 0,051254 | -0,03906 | 0,253 | 0,314 | 1 |
| Ahi1     | 0,05137  | -0,00287 | 0,492 | 0,601 | 1 |
| Zfp553   | 0,051417 | -0,02923 | 0,442 | 0,536 | 1 |
| Zik1     | 0,051418 | -0,01827 | 0,035 | 0,061 | 1 |
| Mtdh     | 0,051501 | 0,092922 | 0,972 | 0,951 | 1 |
| Spag9    | 0,051571 | 0,06893  | 0,969 | 0,964 | 1 |
| Dnase2a  | 0,051627 | 0,071823 | 0,112 | 0,078 | 1 |
| Nr1d1    | 0,051658 | -0,01705 | 0,017 | 0,036 | 1 |
| Tmem168  | 0,051705 | -0,01759 | 0,279 | 0,352 | 1 |
| Btrc     | 0,051718 | -0,04662 | 0,297 | 0,357 | 1 |
| Tmem240  | 0,051791 | -0,00253 | 0,024 | 0,046 | 1 |
| Vasp     | 0,051819 | -0,0344  | 0,11  | 0,152 | 1 |
| Mafb     | 0,051988 | 0,048238 | 0,037 | 0,017 | 1 |
| Kat8     | 0,052016 | -0,01914 | 0,165 | 0,219 | 1 |
| Stat5a   | 0,052156 | 0,027633 | 0,051 | 0,027 | 1 |
| Cog7     | 0,052249 | -0,00786 | 0,29  | 0,369 | 1 |
| Gm37885  | 0,05225  | 0,028114 | 0,037 | 0,017 | 1 |
| Gm16223  | 0,052269 | -0,02447 | 0,026 | 0,049 | 1 |
| Gzmm     | 0,052349 | 0,028902 | 0,037 | 0,017 | 1 |
| Mrm2     | 0,052405 | -0,02121 | 0,13  | 0,177 | 1 |
| Fastkd5  | 0,052464 | -0,01525 | 0,017 | 0,036 | 1 |
| Pcdh10   | 0,052582 | 0,026154 | 0,47  | 0,574 | 1 |
| Gm26582  | 0,052748 | 0,021466 | 0,013 | 0,002 | 1 |
| Fam126b  | 0,052824 | -0,00306 | 0,325 | 0,403 | 1 |
| Cacna2d1 | 0,052833 | 0,014271 | 0,013 | 0,002 | 1 |
| Kcnk7    | 0,052833 | 0,014271 | 0,013 | 0,002 | 1 |
| Gm5608   | 0,052833 | 0,016075 | 0,013 | 0,002 | 1 |
| Ascc3    | 0,052853 | 0,153838 | 0,429 | 0,418 | 1 |
| Mcl1     | 0,052873 | 0,127373 | 0,723 | 0,709 | 1 |
| Sv2c     | 0,052884 | 0,082728 | 0,024 | 0,008 | 1 |
| Rdh13    | 0,052905 | -0,03914 | 0,068 | 0,101 | 1 |
| Uhrf1bp1 | 0,052924 | -0,02694 | 0,057 | 0,089 | 1 |
| Rpl9     | 0,052998 | -0,01165 | 0,993 | 0,996 | 1 |
| Gm53     | 0,053002 | 0,010655 | 0,013 | 0,002 | 1 |
| Cd300a   | 0,053002 | 0,010655 | 0,013 | 0,002 | 1 |
| Ucn2     | 0,053005 | 0,12101  | 0,013 | 0,002 | 1 |

|          |          |          |       |       |   |
|----------|----------|----------|-------|-------|---|
| 2310074N | 0,053152 | -0,02021 | 0,011 | 0,027 | 1 |
| Itpr2    | 0,053192 | 0,107809 | 0,277 | 0,232 | 1 |
| Cuedc1   | 0,053278 | -0,02613 | 0,67  | 0,747 | 1 |
| Prpf3    | 0,053378 | -0,01224 | 0,134 | 0,184 | 1 |
| Bricd5   | 0,053437 | -0,02543 | 0,057 | 0,089 | 1 |
| S100a11  | 0,053457 | 0,027158 | 0,037 | 0,017 | 1 |
| Taf2     | 0,053474 | -0,03681 | 0,235 | 0,295 | 1 |
| Bzw2     | 0,053529 | -0,03615 | 0,127 | 0,171 | 1 |
| Fkbp15   | 0,053534 | -0,03198 | 0,319 | 0,39  | 1 |
| Vps52    | 0,053615 | -0,0251  | 0,35  | 0,432 | 1 |
| Ubr4     | 0,053659 | 0,092688 | 0,44  | 0,405 | 1 |
| Glrx     | 0,053719 | -0,01191 | 0,017 | 0,036 | 1 |
| Nup153   | 0,053737 | 0,079557 | 0,277 | 0,234 | 1 |
| Arhgap33 | 0,05382  | -0,01365 | 0,198 | 0,255 | 1 |
| Suox     | 0,053932 | -0,02263 | 0,077 | 0,114 | 1 |
| Fam199x  | 0,053945 | 0,093968 | 0,275 | 0,234 | 1 |
| Psme4    | 0,053946 | 0,093097 | 0,398 | 0,363 | 1 |
| Tmem88b  | 0,054053 | -0,04316 | 1     | 0,998 | 1 |
| Zfp113   | 0,054081 | -0,03216 | 0,139 | 0,186 | 1 |
| Slc13a3  | 0,054317 | -0,05052 | 0,106 | 0,146 | 1 |
| Gtf2f1   | 0,054427 | 0,002799 | 0,426 | 0,54  | 1 |
| Zswim1   | 0,0545   | -0,03103 | 0,072 | 0,105 | 1 |
| Cgn      | 0,054551 | 0,03117  | 0,024 | 0,008 | 1 |
| Scaper   | 0,054606 | 0,133838 | 0,383 | 0,357 | 1 |
| Dlg3     | 0,054637 | -0,01476 | 0,055 | 0,086 | 1 |
| Lin54    | 0,054646 | -0,02053 | 0,303 | 0,373 | 1 |
| Eif5a    | 0,054647 | -0,03483 | 0,95  | 0,956 | 1 |
| Upf2     | 0,054687 | -0,00427 | 0,413 | 0,513 | 1 |
| Pcdhb4   | 0,054736 | 0,030842 | 0,024 | 0,008 | 1 |
| Ggct     | 0,05477  | 0,006743 | 0,382 | 0,479 | 1 |
| Pdk4     | 0,054775 | -0,02027 | 0,15  | 0,2   | 1 |
| Zeb1     | 0,054792 | 0,029405 | 0,024 | 0,008 | 1 |
| Tmem131l | 0,054792 | 0,029405 | 0,024 | 0,008 | 1 |
| Ncor2    | 0,054824 | 0,126333 | 0,484 | 0,462 | 1 |
| Tbx6     | 0,054894 | 0,037241 | 0,042 | 0,021 | 1 |
| Zfp85    | 0,05491  | -0,02245 | 0,039 | 0,065 | 1 |
| Itfg1    | 0,054975 | -0,036   | 0,721 | 0,789 | 1 |
| Gxylt2   | 0,055034 | 0,018748 | 0,024 | 0,008 | 1 |
| Snapc2   | 0,055038 | -0,02754 | 0,163 | 0,213 | 1 |
| Map7     | 0,055135 | 0,070104 | 0,991 | 0,996 | 1 |
| Cstb     | 0,055135 | 0,118287 | 0,802 | 0,781 | 1 |
| Gdi2     | 0,055175 | -0,04494 | 0,908 | 0,909 | 1 |
| Larp6    | 0,055228 | -0,04785 | 0,778 | 0,838 | 1 |
| 4732491K | 0,055327 | -0,02421 | 0,04  | 0,068 | 1 |
| Bicc1    | 0,055375 | -0,0162  | 0,266 | 0,338 | 1 |
| Ube2j1   | 0,055399 | -0,03204 | 0,233 | 0,291 | 1 |
| Uimc1    | 0,055405 | -0,03216 | 0,262 | 0,329 | 1 |
| Tnrc6a   | 0,055536 | 0,095345 | 0,901 | 0,897 | 1 |
| Dhx32    | 0,055569 | -0,02403 | 0,103 | 0,143 | 1 |
| Cebpg    | 0,055601 | 0,019597 | 0,382 | 0,483 | 1 |
| 2310034G | 0,055727 | -0,00348 | 0,011 | 0,027 | 1 |
| Dnajc12  | 0,055735 | -0,02651 | 0,09  | 0,129 | 1 |

|         |          |          |       |       |   |
|---------|----------|----------|-------|-------|---|
| Supt16  | 0,055878 | 0,102097 | 0,618 | 0,61  | 1 |
| Zfyve1  | 0,055888 | -0,01053 | 0,339 | 0,42  | 1 |
| Prpf40a | 0,055899 | 0,110945 | 0,721 | 0,738 | 1 |
| Nol7    | 0,055899 | -0,03694 | 0,783 | 0,825 | 1 |
| Ap3b2   | 0,055925 | -0,03285 | 0,295 | 0,363 | 1 |
| Tfcp2   | 0,055993 | -0,01758 | 0,215 | 0,276 | 1 |
| Clta    | 0,056232 | -0,02862 | 0,967 | 0,956 | 1 |
| Bdh1    | 0,05627  | -0,04091 | 0,079 | 0,114 | 1 |
| Edem1   | 0,056278 | -0,00718 | 0,255 | 0,329 | 1 |
| Frmd6   | 0,056439 | -0,03051 | 0,042 | 0,07  | 1 |
| Gm48742 | 0,056461 | 0,041393 | 0,064 | 0,038 | 1 |
| Nubpl   | 0,056484 | -0,02563 | 0,062 | 0,095 | 1 |
| Filip1l | 0,056485 | -0,0295  | 0,029 | 0,053 | 1 |
| Abhd2   | 0,056617 | 0,089745 | 0,283 | 0,241 | 1 |
| Gap43   | 0,056698 | -0,01713 | 0,028 | 0,051 | 1 |
| Slc4a10 | 0,056794 | -0,02157 | 0,018 | 0,038 | 1 |
| Pibf1   | 0,056799 | -0,01409 | 0,33  | 0,411 | 1 |
| Mmadhc  | 0,056813 | -0,02617 | 0,484 | 0,584 | 1 |
| Tap1    | 0,056816 | -0,02279 | 0,383 | 0,468 | 1 |
| Rrp15   | 0,056894 | -0,02976 | 0,119 | 0,162 | 1 |
| Eloa    | 0,056963 | -0,0152  | 0,268 | 0,338 | 1 |
| Slc10a3 | 0,056981 | -0,01729 | 0,018 | 0,038 | 1 |
| Celf5   | 0,057035 | 0,027959 | 0,02  | 0,006 | 1 |
| Sptlc1  | 0,057066 | -0,00448 | 0,409 | 0,508 | 1 |
| Pafah2  | 0,057117 | -0,0218  | 0,062 | 0,095 | 1 |
| Snrnp70 | 0,057203 | 0,087332 | 0,978 | 0,975 | 1 |
| Sgsm2   | 0,057226 | 0,049729 | 0,123 | 0,086 | 1 |
| Ppil2   | 0,05726  | -0,01219 | 0,508 | 0,622 | 1 |
| Vps36   | 0,057272 | 0,003805 | 0,292 | 0,369 | 1 |
| Angptl6 | 0,057302 | -0,02258 | 0,128 | 0,175 | 1 |
| Zfp626  | 0,057338 | -0,01718 | 0,139 | 0,186 | 1 |
| Mbd3    | 0,057428 | -0,02536 | 0,6   | 0,703 | 1 |
| Mc1r    | 0,057449 | 0,020842 | 0,02  | 0,006 | 1 |
| Yap1    | 0,057449 | 0,020842 | 0,02  | 0,006 | 1 |
| Phf11c  | 0,057449 | 0,024407 | 0,02  | 0,006 | 1 |
| Tpk1    | 0,057454 | -0,02464 | 0,042 | 0,07  | 1 |
| Tceal9  | 0,05758  | 0,115367 | 0,593 | 0,565 | 1 |
| H2-M5   | 0,0576   | 0,021153 | 0,017 | 0,004 | 1 |
| Kctd12  | 0,0576   | 0,024725 | 0,017 | 0,004 | 1 |
| Rbm8a   | 0,057616 | -0,054   | 0,703 | 0,755 | 1 |
| Pdzd4   | 0,057757 | 0,019363 | 0,017 | 0,004 | 1 |
| Ccl4    | 0,057757 | 0,019363 | 0,017 | 0,004 | 1 |
| Impdh1  | 0,057757 | 0,02294  | 0,017 | 0,004 | 1 |
| Swap70  | 0,057757 | 0,024725 | 0,017 | 0,004 | 1 |
| Cct8    | 0,057796 | -0,04857 | 0,789 | 0,833 | 1 |
| Zfp944  | 0,057807 | -0,02343 | 0,097 | 0,137 | 1 |
| Pitpnm1 | 0,057865 | 0,017264 | 0,02  | 0,006 | 1 |
| Mxd3    | 0,057865 | 0,020842 | 0,02  | 0,006 | 1 |
| Shroom4 | 0,057914 | 0,017569 | 0,017 | 0,004 | 1 |
| Pank2   | 0,057978 | -0,03287 | 0,178 | 0,228 | 1 |
| Stom    | 0,058071 | 0,02294  | 0,017 | 0,004 | 1 |
| Olf639  | 0,058071 | 0,015772 | 0,017 | 0,004 | 1 |

|            |          |          |       |       |   |
|------------|----------|----------|-------|-------|---|
| Gm44759    | 0,058071 | 0,019363 | 0,017 | 0,004 | 1 |
| CntlIn     | 0,058121 | -0,02819 | 0,198 | 0,255 | 1 |
| Ifit1      | 0,058152 | 0,042397 | 0,017 | 0,004 | 1 |
| Grik2      | 0,058152 | 0,097436 | 0,338 | 0,302 | 1 |
| Lrrc75aos2 | 0,058228 | 0,019363 | 0,017 | 0,004 | 1 |
| A330084C   | 0,058228 | 0,015772 | 0,017 | 0,004 | 1 |
| 1810062O   | 0,058228 | 0,013972 | 0,017 | 0,004 | 1 |
| Pick1.1    | 0,058228 | 0,013972 | 0,017 | 0,004 | 1 |
| Kidins220  | 0,05823  | 0,112947 | 0,708 | 0,736 | 1 |
| Ak2        | 0,05825  | -0,01519 | 0,367 | 0,458 | 1 |
| Ccdc61     | 0,058309 | -0,02702 | 0,119 | 0,162 | 1 |
| Kmt2b      | 0,058321 | -0,01982 | 0,281 | 0,35  | 1 |
| A330102I1  | 0,058358 | 0,018748 | 0,02  | 0,006 | 1 |
| Inafm2     | 0,05838  | -0,02163 | 0,273 | 0,335 | 1 |
| 1700007G   | 0,058385 | 0,012168 | 0,017 | 0,004 | 1 |
| Rasd2      | 0,058385 | 0,012168 | 0,017 | 0,004 | 1 |
| Abcg4      | 0,058385 | 0,012168 | 0,017 | 0,004 | 1 |
| Trim45     | 0,058666 | -0,02625 | 0,068 | 0,101 | 1 |
| Sema3c     | 0,058804 | -0,01515 | 0,004 | 0,015 | 1 |
| Gm45159    | 0,058804 | -0,01515 | 0,004 | 0,015 | 1 |
| Hdx        | 0,058846 | -0,04427 | 0,088 | 0,124 | 1 |
| C030047K   | 0,058979 | -0,01307 | 0,004 | 0,015 | 1 |
| Gm26873    | 0,058979 | -0,01307 | 0,004 | 0,015 | 1 |
| Frat1      | 0,059019 | -0,02414 | 0,062 | 0,095 | 1 |
| Myh7b      | 0,059063 | 0,108483 | 0,262 | 0,219 | 1 |
| Gm10457    | 0,059069 | -0,02157 | 0,004 | 0,015 | 1 |
| Parm1      | 0,059083 | -0,02063 | 0,323 | 0,399 | 1 |
| Hprt       | 0,059129 | -0,03141 | 0,228 | 0,285 | 1 |
| Mfap1a     | 0,05914  | -0,02474 | 0,435 | 0,515 | 1 |
| Wdr38      | 0,059155 | -0,011   | 0,004 | 0,015 | 1 |
| Kcnq4      | 0,059155 | -0,011   | 0,004 | 0,015 | 1 |
| Gm42495    | 0,059155 | -0,011   | 0,004 | 0,015 | 1 |
| Gm10602    | 0,059155 | -0,011   | 0,004 | 0,015 | 1 |
| Acsm3      | 0,059155 | -0,011   | 0,004 | 0,015 | 1 |
| Pxdc1      | 0,059155 | -0,011   | 0,004 | 0,015 | 1 |
| Slc15a2    | 0,059183 | -0,01606 | 0,028 | 0,051 | 1 |
| Ppp6r3     | 0,059232 | 0,105701 | 0,514 | 0,5   | 1 |
| Pigt       | 0,059236 | 0,1041   | 0,644 | 0,656 | 1 |
| Sf3b4      | 0,05925  | 0,000794 | 0,406 | 0,511 | 1 |
| Ube2q1     | 0,059275 | -0,01783 | 0,424 | 0,496 | 1 |
| Sgsh       | 0,059289 | -0,03659 | 0,16  | 0,209 | 1 |
| Mfhas1     | 0,059327 | -0,02511 | 0,029 | 0,053 | 1 |
| Siva1      | 0,059391 | -0,01572 | 0,483 | 0,58  | 1 |
| Cdc42bpg   | 0,059422 | 0,01308  | 0,02  | 0,006 | 1 |
| Piezo2     | 0,059476 | 0,086507 | 0,222 | 0,175 | 1 |
| Apba1      | 0,059481 | 0,110001 | 0,475 | 0,462 | 1 |
| Jag1       | 0,059491 | -0,01769 | 0,007 | 0,021 | 1 |
| Fam186a    | 0,059491 | -0,01769 | 0,007 | 0,021 | 1 |
| E130114P1  | 0,059491 | -0,01974 | 0,007 | 0,021 | 1 |
| Rnasel     | 0,059491 | -0,02589 | 0,007 | 0,021 | 1 |
| Mex3d      | 0,059563 | -0,02077 | 0,246 | 0,312 | 1 |
| Adgra3     | 0,059581 | -0,02135 | 0,029 | 0,053 | 1 |

|           |          |          |       |       |   |
|-----------|----------|----------|-------|-------|---|
| Mb21d1    | 0,059601 | -0,01125 | 0,004 | 0,015 | 1 |
| Pot1a     | 0,059634 | -0,0468  | 0,229 | 0,285 | 1 |
| 170001011 | 0,059777 | -0,01563 | 0,007 | 0,021 | 1 |
| Ddx25     | 0,059779 | -0,00553 | 0,004 | 0,015 | 1 |
| Srgn      | 0,059779 | -0,00735 | 0,004 | 0,015 | 1 |
| Hdgfl3    | 0,059784 | -0,02129 | 0,615 | 0,717 | 1 |
| Nup210    | 0,059882 | 0,044376 | 0,105 | 0,072 | 1 |
| C130071C  | 0,059886 | 0,00853  | 0,253 | 0,325 | 1 |
| Bckdha    | 0,059998 | -0,02771 | 0,51  | 0,603 | 1 |
| Aplf      | 0,060045 | -0,02686 | 0,07  | 0,103 | 1 |
| Pabpc5    | 0,060063 | -0,01356 | 0,007 | 0,021 | 1 |
| Cnksr3    | 0,060095 | -0,04657 | 0,101 | 0,139 | 1 |
| En2       | 0,060121 | -0,01155 | 0,196 | 0,253 | 1 |
| mt-Nd2    | 0,060223 | 0,063397 | 1     | 0,998 | 1 |
| Adamts1   | 0,060344 | 0,362513 | 0,369 | 0,346 | 1 |
| Tsc22d2   | 0,06035  | 0,150339 | 0,47  | 0,458 | 1 |
| Nradd     | 0,060385 | 0,05329  | 0,092 | 0,061 | 1 |
| Hexdc     | 0,060424 | -0,02656 | 0,161 | 0,211 | 1 |
| Hoxa1     | 0,060427 | -0,01998 | 0,007 | 0,021 | 1 |
| A330069E1 | 0,060449 | -0,03774 | 0,088 | 0,127 | 1 |
| Sdha      | 0,060528 | -0,0425  | 0,894 | 0,922 | 1 |
| Rpa2      | 0,060705 | -0,02907 | 0,277 | 0,342 | 1 |
| Gpatch8   | 0,060728 | -0,03904 | 0,866 | 0,916 | 1 |
| Gnpat     | 0,06076  | -0,03233 | 0,292 | 0,359 | 1 |
| Gm2464    | 0,060789 | -0,01175 | 0,007 | 0,021 | 1 |
| Gm44658   | 0,060789 | -0,01175 | 0,007 | 0,021 | 1 |
| Gm15743   | 0,060789 | -0,01175 | 0,007 | 0,021 | 1 |
| Trim56    | 0,060906 | 0,066364 | 0,099 | 0,068 | 1 |
| Pigl      | 0,060964 | -0,02625 | 0,068 | 0,101 | 1 |
| Nbea      | 0,060978 | -0,05428 | 0,611 | 0,681 | 1 |
| Clcn7     | 0,060993 | -0,02573 | 0,209 | 0,266 | 1 |
| Sqstm1    | 0,061045 | 0,068875 | 0,95  | 0,941 | 1 |
| Tmem55a   | 0,061099 | -0,02588 | 0,147 | 0,194 | 1 |
| Mtmr6     | 0,061173 | 0,110832 | 0,572 | 0,582 | 1 |
| Fzd5      | 0,061516 | -0,03108 | 0,088 | 0,124 | 1 |
| Taf7      | 0,061576 | -0,00771 | 0,424 | 0,513 | 1 |
| Arhgap24  | 0,061582 | -0,01863 | 0,013 | 0,03  | 1 |
| Traf2     | 0,061623 | -0,02772 | 0,163 | 0,213 | 1 |
| Ccdc92    | 0,061639 | 0,068286 | 0,194 | 0,154 | 1 |
| Slc4a8    | 0,061705 | 0,084799 | 0,295 | 0,247 | 1 |
| Trip4     | 0,061809 | -0,03176 | 0,363 | 0,439 | 1 |
| Ccdc47    | 0,061901 | -0,02872 | 0,897 | 0,937 | 1 |
| Stkld1    | 0,061909 | 0,007313 | 0,007 | 0     | 1 |
| Olfml3    | 0,061909 | 0,007313 | 0,007 | 0     | 1 |
| Cand2     | 0,061909 | 0,007313 | 0,007 | 0     | 1 |
| Pirb      | 0,061909 | 0,007313 | 0,007 | 0     | 1 |
| D030034A  | 0,061909 | 0,007313 | 0,007 | 0     | 1 |
| Cyp4v3    | 0,061909 | 0,007313 | 0,007 | 0     | 1 |
| Disc1     | 0,061909 | 0,007313 | 0,007 | 0     | 1 |
| Zmiz1os1  | 0,061909 | 0,007313 | 0,007 | 0     | 1 |
| Haus4     | 0,061909 | 0,007313 | 0,007 | 0     | 1 |
| Tcap      | 0,061909 | 0,007313 | 0,007 | 0     | 1 |

|           |          |          |       |       |   |
|-----------|----------|----------|-------|-------|---|
| Nckap5los | 0,061909 | 0,007313 | 0,007 | 0     | 1 |
| Gm49227   | 0,061909 | 0,007313 | 0,007 | 0     | 1 |
| Acs15     | 0,061909 | 0,007313 | 0,007 | 0     | 1 |
| Timp1     | 0,061909 | 0,019982 | 0,007 | 0     | 1 |
| 2410004P( | 0,061909 | 0,016379 | 0,007 | 0     | 1 |
| Clvs1     | 0,061909 | 0,012762 | 0,007 | 0     | 1 |
| Gm47117   | 0,061909 | 0,012762 | 0,007 | 0     | 1 |
| Gm48342   | 0,061909 | 0,010949 | 0,007 | 0     | 1 |
| Olfr366   | 0,061909 | 0,009132 | 0,007 | 0     | 1 |
| Stk32b    | 0,061909 | 0,009132 | 0,007 | 0     | 1 |
| Wipf3     | 0,061909 | 0,009132 | 0,007 | 0     | 1 |
| Prrt3     | 0,061909 | 0,009132 | 0,007 | 0     | 1 |
| 1700067K( | 0,061909 | 0,009132 | 0,007 | 0     | 1 |
| Gm26816   | 0,061909 | 0,009132 | 0,007 | 0     | 1 |
| Gm35166   | 0,061909 | 0,009132 | 0,007 | 0     | 1 |
| Kbtbd6    | 0,061909 | 0,009132 | 0,007 | 0     | 1 |
| Gm26767   | 0,061909 | 0,009132 | 0,007 | 0     | 1 |
| Gpr22     | 0,061909 | 0,009132 | 0,007 | 0     | 1 |
| Fkbp11    | 0,061909 | 0,009132 | 0,007 | 0     | 1 |
| Mirt1     | 0,061909 | 0,009132 | 0,007 | 0     | 1 |
| Rapgef6   | 0,061909 | 0,133289 | 0,402 | 0,384 | 1 |
| Stab1     | 0,061909 | 0,010949 | 0,007 | 0     | 1 |
| I830134HC | 0,061909 | 0,010949 | 0,007 | 0     | 1 |
| Tgtp2     | 0,061909 | 0,025364 | 0,007 | 0     | 1 |
| Ccl2      | 0,061909 | 0,019982 | 0,007 | 0     | 1 |
| 9930111J2 | 0,061909 | 0,016379 | 0,007 | 0     | 1 |
| D030040B: | 0,061909 | 0,012762 | 0,007 | 0     | 1 |
| Tmem82    | 0,061909 | 0,012762 | 0,007 | 0     | 1 |
| AI854703  | 0,061909 | 0,012762 | 0,007 | 0     | 1 |
| Parp10    | 0,061909 | 0,012762 | 0,007 | 0     | 1 |
| Scn7a     | 0,061909 | 0,018182 | 0,007 | 0     | 1 |
| Zfp61     | 0,06192  | -0,03199 | 0,086 | 0,122 | 1 |
| Nop9      | 0,061988 | -0,02081 | 0,125 | 0,169 | 1 |
| Wdfy1     | 0,062084 | 0,13829  | 0,451 | 0,439 | 1 |
| A230009B: | 0,062091 | -0,02939 | 0,275 | 0,342 | 1 |
| Slc4a7    | 0,062128 | 0,05326  | 0,141 | 0,103 | 1 |
| Angel2    | 0,062201 | -0,01128 | 0,448 | 0,557 | 1 |
| Aldh2     | 0,062269 | -0,06588 | 0,246 | 0,304 | 1 |
| Zfp341    | 0,062269 | -0,03086 | 0,033 | 0,057 | 1 |
| Kirrel3   | 0,062426 | 0,090599 | 0,189 | 0,148 | 1 |
| Txn14b    | 0,062458 | -0,022   | 0,105 | 0,146 | 1 |
| Nupl2     | 0,062481 | -0,0194  | 0,046 | 0,074 | 1 |
| Zfp787    | 0,062496 | -0,03504 | 0,191 | 0,241 | 1 |
| Mbd2      | 0,062514 | -0,04375 | 0,587 | 0,675 | 1 |
| C030034I2 | 0,062533 | -0,0063  | 0,028 | 0,051 | 1 |
| Cep131    | 0,06254  | -0,02537 | 0,077 | 0,112 | 1 |
| Irf2bp2   | 0,062585 | 0,125703 | 0,774 | 0,814 | 1 |
| Arhgef1   | 0,062681 | -0,02364 | 0,325 | 0,392 | 1 |
| Zfp513    | 0,062731 | -0,03999 | 0,141 | 0,184 | 1 |
| Soga3     | 0,062752 | -0,04097 | 0,596 | 0,667 | 1 |
| Itpkc     | 0,062917 | 0,069772 | 0,11  | 0,078 | 1 |
| KIhl11    | 0,062949 | -0,0333  | 0,095 | 0,133 | 1 |

|           |          |          |       |       |   |
|-----------|----------|----------|-------|-------|---|
| Trpc4ap   | 0,06299  | 0,082546 | 0,824 | 0,848 | 1 |
| Ctsl      | 0,063035 | -0,04682 | 0,679 | 0,743 | 1 |
| Tanc2     | 0,063074 | -0,01548 | 0,33  | 0,411 | 1 |
| MsrA      | 0,063139 | 0,087666 | 0,25  | 0,209 | 1 |
| Chd8      | 0,06314  | 0,100797 | 0,585 | 0,572 | 1 |
| Marcks    | 0,06315  | -0,05983 | 0,02  | 0,04  | 1 |
| Zfp317    | 0,063158 | -0,02601 | 0,193 | 0,247 | 1 |
| Il1r2     | 0,063178 | -0,00631 | 0     | 0,006 | 1 |
| Gm15675   | 0,063178 | -0,00631 | 0     | 0,006 | 1 |
| Gm29514   | 0,063178 | -0,00631 | 0     | 0,006 | 1 |
| Cd48      | 0,063178 | -0,00631 | 0     | 0,006 | 1 |
| Lcn2      | 0,063178 | -0,00631 | 0     | 0,006 | 1 |
| Tgm2      | 0,063178 | -0,00631 | 0     | 0,006 | 1 |
| Wisp2     | 0,063178 | -0,00631 | 0     | 0,006 | 1 |
| Gdgd2     | 0,063178 | -0,00631 | 0     | 0,006 | 1 |
| Arxes1    | 0,063178 | -0,00631 | 0     | 0,006 | 1 |
| Htr2c     | 0,063178 | -0,00631 | 0     | 0,006 | 1 |
| Ace2      | 0,063178 | -0,00631 | 0     | 0,006 | 1 |
| Rbm46     | 0,063178 | -0,00631 | 0     | 0,006 | 1 |
| Vcam1     | 0,063178 | -0,00631 | 0     | 0,006 | 1 |
| Bmpr1b    | 0,063178 | -0,00631 | 0     | 0,006 | 1 |
| Gm34866   | 0,063178 | -0,00631 | 0     | 0,006 | 1 |
| Gm11831   | 0,063178 | -0,00631 | 0     | 0,006 | 1 |
| Gm12394   | 0,063178 | -0,00631 | 0     | 0,006 | 1 |
| Echdc2    | 0,063178 | -0,00631 | 0     | 0,006 | 1 |
| Laptm5    | 0,063178 | -0,00631 | 0     | 0,006 | 1 |
| Extl1     | 0,063178 | -0,00631 | 0     | 0,006 | 1 |
| Alpl      | 0,063178 | -0,00631 | 0     | 0,006 | 1 |
| Poln      | 0,063178 | -0,00631 | 0     | 0,006 | 1 |
| Gm16054   | 0,063178 | -0,00631 | 0     | 0,006 | 1 |
| Tacr1     | 0,063178 | -0,00631 | 0     | 0,006 | 1 |
| Gm44210   | 0,063178 | -0,00631 | 0     | 0,006 | 1 |
| Clec4d    | 0,063178 | -0,00631 | 0     | 0,006 | 1 |
| Zfp296    | 0,063178 | -0,00631 | 0     | 0,006 | 1 |
| B3gnt8    | 0,063178 | -0,00631 | 0     | 0,006 | 1 |
| Gm9885    | 0,063178 | -0,00631 | 0     | 0,006 | 1 |
| Gm44899   | 0,063178 | -0,00631 | 0     | 0,006 | 1 |
| Tsku      | 0,063178 | -0,00631 | 0     | 0,006 | 1 |
| Gm26705   | 0,063178 | -0,00631 | 0     | 0,006 | 1 |
| Fam57b    | 0,063178 | -0,00631 | 0     | 0,006 | 1 |
| Plpp4     | 0,063178 | -0,00631 | 0     | 0,006 | 1 |
| Tacc2     | 0,063178 | -0,00631 | 0     | 0,006 | 1 |
| Matk      | 0,063178 | -0,00631 | 0     | 0,006 | 1 |
| Gm15319   | 0,063178 | -0,00631 | 0     | 0,006 | 1 |
| Npy1r     | 0,063178 | -0,00631 | 0     | 0,006 | 1 |
| Cx3cl1    | 0,063178 | -0,00631 | 0     | 0,006 | 1 |
| Chst5     | 0,063178 | -0,00631 | 0     | 0,006 | 1 |
| Pnoc      | 0,063178 | -0,00631 | 0     | 0,006 | 1 |
| Gm41183   | 0,063178 | -0,00631 | 0     | 0,006 | 1 |
| Gpc5      | 0,063178 | -0,00631 | 0     | 0,006 | 1 |
| Pdgfd     | 0,063178 | -0,00631 | 0     | 0,006 | 1 |
| 49305240l | 0,063178 | -0,00631 | 0     | 0,006 | 1 |

|           |          |          |       |       |   |
|-----------|----------|----------|-------|-------|---|
| Gm47043   | 0,063178 | -0,00631 | 0     | 0,006 | 1 |
| Cabp7     | 0,063178 | -0,00631 | 0     | 0,006 | 1 |
| Nefh      | 0,063178 | -0,00631 | 0     | 0,006 | 1 |
| 4930505A  | 0,063178 | -0,00631 | 0     | 0,006 | 1 |
| Tlx3      | 0,063178 | -0,00631 | 0     | 0,006 | 1 |
| 4930412M  | 0,063178 | -0,00631 | 0     | 0,006 | 1 |
| Abcc3     | 0,063178 | -0,00631 | 0     | 0,006 | 1 |
| Hoxb9     | 0,063178 | -0,00631 | 0     | 0,006 | 1 |
| Etv4      | 0,063178 | -0,00631 | 0     | 0,006 | 1 |
| Kcnj16    | 0,063178 | -0,00631 | 0     | 0,006 | 1 |
| Hist1h4i  | 0,063178 | -0,00631 | 0     | 0,006 | 1 |
| A330076C  | 0,063178 | -0,00631 | 0     | 0,006 | 1 |
| Cap2      | 0,063178 | -0,00631 | 0     | 0,006 | 1 |
| Gm35725   | 0,063178 | -0,00631 | 0     | 0,006 | 1 |
| Efcab10   | 0,063178 | -0,00631 | 0     | 0,006 | 1 |
| Ngb       | 0,063178 | -0,00631 | 0     | 0,006 | 1 |
| Mchr1     | 0,063178 | -0,00631 | 0     | 0,006 | 1 |
| Wnt7b     | 0,063178 | -0,00631 | 0     | 0,006 | 1 |
| AU022754  | 0,063178 | -0,00631 | 0     | 0,006 | 1 |
| Igfbp6    | 0,063178 | -0,00631 | 0     | 0,006 | 1 |
| Hoxc9     | 0,063178 | -0,00631 | 0     | 0,006 | 1 |
| Fstl1     | 0,063178 | -0,00631 | 0     | 0,006 | 1 |
| 2810407A  | 0,063178 | -0,00631 | 0     | 0,006 | 1 |
| Rpl7a-ps5 | 0,063178 | -0,00631 | 0     | 0,006 | 1 |
| Pcdha12   | 0,063178 | -0,00631 | 0     | 0,006 | 1 |
| Pcdhga2   | 0,063178 | -0,00631 | 0     | 0,006 | 1 |
| 1700011I0 | 0,063178 | -0,00631 | 0     | 0,006 | 1 |
| Golga7b   | 0,063178 | -0,00631 | 0     | 0,006 | 1 |
| Ina       | 0,063178 | -0,00631 | 0     | 0,006 | 1 |
| A930001A  | 0,063178 | -0,0084  | 0     | 0,006 | 1 |
| Arhgef26  | 0,063178 | -0,0084  | 0     | 0,006 | 1 |
| F3        | 0,063178 | -0,0084  | 0     | 0,006 | 1 |
| Zfp69     | 0,063178 | -0,0084  | 0     | 0,006 | 1 |
| 1700001JC | 0,063178 | -0,0084  | 0     | 0,006 | 1 |
| Add2      | 0,063178 | -0,0084  | 0     | 0,006 | 1 |
| Ccdc38    | 0,063178 | -0,0084  | 0     | 0,006 | 1 |
| Unc5d     | 0,063178 | -0,0084  | 0     | 0,006 | 1 |
| Unc13c    | 0,063178 | -0,0084  | 0     | 0,006 | 1 |
| Zmynd15   | 0,063178 | -0,0084  | 0     | 0,006 | 1 |
| Sult4a1   | 0,063178 | -0,0084  | 0     | 0,006 | 1 |
| Grp       | 0,063178 | -0,0084  | 0     | 0,006 | 1 |
| Gm16299   | 0,063178 | -0,0084  | 0     | 0,006 | 1 |
| Fndc9     | 0,063178 | -0,01049 | 0     | 0,006 | 1 |
| Tmem178   | 0,063178 | -0,01258 | 0     | 0,006 | 1 |
| Hoxb5     | 0,063178 | -0,01466 | 0     | 0,006 | 1 |
| Kif13b    | 0,063209 | 0,070399 | 0,91  | 0,901 | 1 |
| Pdzd7     | 0,063293 | -0,01502 | 0,013 | 0,03  | 1 |
| Nsmf      | 0,063321 | -0,02687 | 0,512 | 0,62  | 1 |
| Zc4h2     | 0,063482 | -0,01352 | 0,167 | 0,219 | 1 |
| Atg101    | 0,063701 | -0,01558 | 0,261 | 0,327 | 1 |
| Fxyd3     | 0,063788 | -0,02764 | 0,051 | 0,08  | 1 |
| Slc2a3    | 0,063922 | 0,031291 | 0,039 | 0,019 | 1 |



|           |          |          |       |       |   |
|-----------|----------|----------|-------|-------|---|
| Mtmr12    | 0,064117 | -0,02816 | 0,092 | 0,129 | 1 |
| Khk       | 0,064189 | -0,01916 | 0,103 | 0,143 | 1 |
| Eif2b4    | 0,064365 | -0,0338  | 0,336 | 0,407 | 1 |
| Dand5     | 0,064377 | -0,03458 | 0,108 | 0,148 | 1 |
| Dmd       | 0,064441 | -0,03872 | 0,097 | 0,133 | 1 |
| 9430015G  | 0,064456 | -0,02757 | 0,092 | 0,129 | 1 |
| Shoc2     | 0,064799 | -0,01046 | 0,231 | 0,297 | 1 |
| Cpsf3     | 0,064956 | -0,0167  | 0,319 | 0,39  | 1 |
| Zfp709    | 0,064962 | -0,02113 | 0,033 | 0,057 | 1 |
| Gm10701   | 0,065077 | 0,047182 | 0,05  | 0,027 | 1 |
| Acvr1     | 0,065145 | -0,02008 | 0,161 | 0,211 | 1 |
| Zbtb25    | 0,065234 | -0,03276 | 0,101 | 0,139 | 1 |
| Cux1      | 0,065354 | 0,119565 | 0,574 | 0,586 | 1 |
| Gm16124   | 0,065373 | -0,02983 | 0,022 | 0,042 | 1 |
| Slc13a5   | 0,065389 | -0,02378 | 0,033 | 0,057 | 1 |
| Sdad1     | 0,065435 | -0,00541 | 0,165 | 0,219 | 1 |
| Tmem109   | 0,065857 | -0,01066 | 0,433 | 0,519 | 1 |
| Mief1     | 0,065866 | -0,01869 | 0,194 | 0,249 | 1 |
| Pcdh7     | 0,065888 | -0,04615 | 0,039 | 0,063 | 1 |
| Fam131b   | 0,06608  | -0,06238 | 0,571 | 0,627 | 1 |
| Dtna      | 0,066112 | 0,125193 | 0,71  | 0,715 | 1 |
| Wbp4      | 0,066229 | -0,01325 | 0,521 | 0,603 | 1 |
| Chchd10   | 0,066237 | -0,18329 | 0,2   | 0,247 | 1 |
| Slc8b1    | 0,066258 | 0,05211  | 0,167 | 0,127 | 1 |
| Cdyl      | 0,06639  | -0,02826 | 0,128 | 0,171 | 1 |
| 9330175E1 | 0,066401 | 0,02169  | 0,029 | 0,013 | 1 |
| Spc24     | 0,066401 | 0,023461 | 0,029 | 0,013 | 1 |
| Ankrd17   | 0,066469 | 0,123673 | 0,585 | 0,593 | 1 |
| Armcx6    | 0,066585 | -0,02266 | 0,053 | 0,082 | 1 |
| 1810009A  | 0,066607 | -0,01782 | 0,033 | 0,057 | 1 |
| Sorbs3    | 0,066912 | -0,02818 | 0,481 | 0,574 | 1 |
| 201011110 | 0,066941 | -0,00989 | 0,505 | 0,603 | 1 |
| Dpysl2    | 0,066954 | -0,03779 | 1     | 0,998 | 1 |
| Pik3c3    | 0,067063 | -0,01058 | 0,339 | 0,418 | 1 |
| Fbxo21    | 0,067077 | 0,093515 | 0,679 | 0,698 | 1 |
| Phf2      | 0,067106 | 0,074623 | 0,361 | 0,316 | 1 |
| Lysmd3    | 0,067136 | 0,012366 | 0,303 | 0,382 | 1 |
| Papolg    | 0,067181 | -0,02651 | 0,09  | 0,127 | 1 |
| Gtf2e1    | 0,067219 | -0,03002 | 0,136 | 0,179 | 1 |
| Cul1      | 0,067268 | -0,03384 | 0,633 | 0,707 | 1 |
| Gm8797    | 0,067272 | -0,03038 | 0,061 | 0,091 | 1 |
| Snrnp200  | 0,067483 | -0,02616 | 0,398 | 0,483 | 1 |
| Gm15594   | 0,067508 | -0,0112  | 0,046 | 0,074 | 1 |
| Zfp53     | 0,067618 | -0,02325 | 0,086 | 0,122 | 1 |
| Plod3     | 0,067677 | -0,00909 | 0,396 | 0,481 | 1 |
| Rab13     | 0,067688 | -0,0205  | 0,051 | 0,08  | 1 |
| Tcp1      | 0,067698 | -0,03124 | 0,75  | 0,821 | 1 |
| Cox20     | 0,067927 | -0,01861 | 0,396 | 0,481 | 1 |
| Trim23    | 0,067936 | -0,02905 | 0,288 | 0,344 | 1 |
| Fmr1      | 0,067972 | 0,110124 | 0,633 | 0,631 | 1 |
| Wrap73    | 0,068026 | -0,01859 | 0,213 | 0,27  | 1 |
| Gm26673   | 0,068049 | 0,044442 | 0,05  | 0,027 | 1 |

|           |          |          |       |       |   |
|-----------|----------|----------|-------|-------|---|
| Tacc3     | 0,068064 | -0,01691 | 0,094 | 0,131 | 1 |
| Gon7      | 0,068097 | -0,02021 | 0,114 | 0,156 | 1 |
| Zkscan3   | 0,06814  | -0,03455 | 0,477 | 0,565 | 1 |
| Mob2      | 0,068163 | -0,01037 | 0,343 | 0,43  | 1 |
| Gm42715   | 0,06823  | 0,041406 | 0,073 | 0,046 | 1 |
| Gsr       | 0,06832  | -0,04019 | 0,369 | 0,443 | 1 |
| Cbx7      | 0,068379 | -0,01469 | 0,248 | 0,312 | 1 |
| Shank1    | 0,068398 | -0,02604 | 0,024 | 0,044 | 1 |
| Zfp948    | 0,06841  | -0,0332  | 0,152 | 0,198 | 1 |
| Rnf8      | 0,068417 | -0,03032 | 0,167 | 0,215 | 1 |
| Mon2      | 0,068505 | 0,097295 | 0,686 | 0,7   | 1 |
| Nt5e      | 0,068572 | -0,01886 | 0,073 | 0,108 | 1 |
| Stx7      | 0,068745 | -0,04174 | 0,782 | 0,846 | 1 |
| Ccdc166   | 0,068762 | -0,01958 | 0,035 | 0,059 | 1 |
| Ndr3      | 0,068831 | -0,03411 | 0,516 | 0,614 | 1 |
| Gm26733   | 0,068852 | -0,01239 | 0,022 | 0,042 | 1 |
| Cln5      | 0,068889 | -0,01357 | 0,382 | 0,464 | 1 |
| Agl       | 0,068944 | -0,02401 | 0,172 | 0,224 | 1 |
| Park2     | 0,06896  | -0,01153 | 0,141 | 0,188 | 1 |
| Zfp870    | 0,068981 | -0,02752 | 0,037 | 0,061 | 1 |
| Atp6v1g2  | 0,069243 | -0,0151  | 0,05  | 0,078 | 1 |
| Abraxas1  | 0,069282 | -0,00505 | 0,031 | 0,055 | 1 |
| Zbtb17    | 0,069482 | 0,053916 | 0,158 | 0,12  | 1 |
| Gucy1b1   | 0,069715 | -0,03117 | 0,061 | 0,091 | 1 |
| Ntrk2     | 0,069761 | -0,00705 | 0,031 | 0,055 | 1 |
| Dpf3      | 0,069784 | -0,01283 | 0,002 | 0,011 | 1 |
| Pde5a     | 0,069784 | -0,0149  | 0,002 | 0,011 | 1 |
| Ppox      | 0,069828 | -0,02064 | 0,147 | 0,194 | 1 |
| Gm17281   | 0,069907 | -0,01075 | 0,002 | 0,011 | 1 |
| Gm30097   | 0,069907 | -0,01075 | 0,002 | 0,011 | 1 |
| Gm45708   | 0,069907 | -0,01075 | 0,002 | 0,011 | 1 |
| Slc39a2   | 0,069907 | -0,01075 | 0,002 | 0,011 | 1 |
| 9230116LC | 0,069907 | -0,01075 | 0,002 | 0,011 | 1 |
| Pcdha11.1 | 0,069907 | -0,01075 | 0,002 | 0,011 | 1 |
| Zfp768    | 0,069909 | -0,03014 | 0,169 | 0,217 | 1 |
| Lrrc59    | 0,069938 | -0,00336 | 0,257 | 0,323 | 1 |
| Col5a3    | 0,069951 | 0,04378  | 0,035 | 0,017 | 1 |
| Oxa1l     | 0,06997  | -0,00255 | 0,367 | 0,451 | 1 |
| Got2      | 0,069993 | -0,02903 | 0,596 | 0,692 | 1 |
| Gm13563   | 0,070031 | -0,00866 | 0,002 | 0,011 | 1 |
| Gria3     | 0,070031 | -0,00866 | 0,002 | 0,011 | 1 |
| Gm15477   | 0,070031 | -0,00866 | 0,002 | 0,011 | 1 |
| Gbp4      | 0,070031 | -0,00866 | 0,002 | 0,011 | 1 |
| Tmem116   | 0,070031 | -0,00866 | 0,002 | 0,011 | 1 |
| Gm44264   | 0,070031 | -0,00866 | 0,002 | 0,011 | 1 |
| Gm45799   | 0,070031 | -0,00866 | 0,002 | 0,011 | 1 |
| Gm48045   | 0,070031 | -0,00866 | 0,002 | 0,011 | 1 |
| Btbd11    | 0,070031 | -0,00866 | 0,002 | 0,011 | 1 |
| Trim43a   | 0,070031 | -0,00866 | 0,002 | 0,011 | 1 |
| Adora2b   | 0,070031 | -0,00866 | 0,002 | 0,011 | 1 |
| Stmnd1    | 0,070031 | -0,00866 | 0,002 | 0,011 | 1 |
| C030010L1 | 0,070031 | -0,00866 | 0,002 | 0,011 | 1 |

|           |          |          |       |       |   |
|-----------|----------|----------|-------|-------|---|
| Gm3417    | 0,070031 | -0,00866 | 0,002 | 0,011 | 1 |
| Crtc1     | 0,070045 | -0,02722 | 0,112 | 0,152 | 1 |
| Wdr12     | 0,070053 | -0,00356 | 0,253 | 0,321 | 1 |
| Klhl5     | 0,070127 | -0,02835 | 0,167 | 0,215 | 1 |
| Plekhh1   | 0,070296 | 0,065427 | 0,978 | 0,96  | 1 |
| Rpgrip1   | 0,070331 | -0,00775 | 0,255 | 0,319 | 1 |
| Zfp367    | 0,070439 | -0,02255 | 0,158 | 0,207 | 1 |
| Ccdc126   | 0,070552 | -0,03365 | 0,068 | 0,099 | 1 |
| Pex6      | 0,070572 | -0,03592 | 0,314 | 0,382 | 1 |
| Chpf2     | 0,070616 | -0,04507 | 0,114 | 0,152 | 1 |
| Clybl     | 0,070627 | -0,01322 | 0,015 | 0,032 | 1 |
| 18100300l | 0,070628 | -0,03957 | 0,242 | 0,302 | 1 |
| Cd302     | 0,070656 | -0,00683 | 0,002 | 0,011 | 1 |
| Cplx2     | 0,070656 | -0,00683 | 0,002 | 0,011 | 1 |
| Rab3c     | 0,070656 | -0,00683 | 0,002 | 0,011 | 1 |
| Gm29773   | 0,07066  | -0,10072 | 0,009 | 0,023 | 1 |
| Ankyf1    | 0,070693 | -0,0275  | 0,347 | 0,42  | 1 |
| Ehmt2     | 0,070792 | 0,092888 | 0,417 | 0,384 | 1 |
| Zfp72     | 0,071028 | -0,02501 | 0,059 | 0,089 | 1 |
| Mlec      | 0,071038 | -0,00715 | 0,505 | 0,61  | 1 |
| 241008010 | 0,071078 | -0,00938 | 0,015 | 0,032 | 1 |
| Cpeb3     | 0,071191 | -0,01913 | 0,338 | 0,414 | 1 |
| Dnajc27   | 0,07125  | -0,01712 | 0,099 | 0,137 | 1 |
| Alg12     | 0,071268 | -0,02755 | 0,068 | 0,099 | 1 |
| Itgb1     | 0,071366 | 0,08224  | 0,761 | 0,749 | 1 |
| Ago1      | 0,071392 | -0,01118 | 0,376 | 0,449 | 1 |
| Rab35     | 0,071425 | -0,01739 | 0,262 | 0,327 | 1 |
| Dars2     | 0,071504 | -0,01806 | 0,086 | 0,122 | 1 |
| Mlst8     | 0,071525 | -0,02751 | 0,139 | 0,184 | 1 |
| Bbs10     | 0,071538 | -0,01322 | 0,015 | 0,032 | 1 |
| mt-Atp8   | 0,071552 | 0,082302 | 0,961 | 0,956 | 1 |
| Brinp3    | 0,071571 | -0,01822 | 0,024 | 0,044 | 1 |
| Gm26546   | 0,071603 | -0,01142 | 0,015 | 0,032 | 1 |
| Laptm4a   | 0,071677 | -0,03758 | 0,864 | 0,884 | 1 |
| Zcrb1     | 0,071834 | -0,03966 | 0,646 | 0,73  | 1 |
| Gtf2h1    | 0,07197  | -0,02668 | 0,261 | 0,316 | 1 |
| Rbm5      | 0,072066 | 0,071423 | 0,839 | 0,808 | 1 |
| 9930012K: | 0,072119 | -0,01943 | 0,055 | 0,084 | 1 |
| Dnm1      | 0,072131 | -0,01587 | 0,009 | 0,023 | 1 |
| Etaa1os   | 0,072228 | -0,00957 | 0,024 | 0,044 | 1 |
| Spryd4    | 0,072385 | -0,02115 | 0,061 | 0,091 | 1 |
| Zc3hc1    | 0,072526 | -0,02762 | 0,15  | 0,196 | 1 |
| Gm28424   | 0,072528 | -0,01816 | 0,009 | 0,023 | 1 |
| Plk3      | 0,072686 | 0,000365 | 0,312 | 0,386 | 1 |
| Lrat      | 0,072921 | -0,01611 | 0,009 | 0,023 | 1 |
| Gm44053   | 0,073    | -0,01405 | 0,009 | 0,023 | 1 |
| C330027C: | 0,073    | -0,01405 | 0,009 | 0,023 | 1 |
| 4932438H: | 0,07308  | -0,01248 | 0,009 | 0,023 | 1 |
| Rpl17     | 0,073094 | 0,001746 | 0,987 | 0,985 | 1 |
| Kansl1    | 0,073155 | 0,121468 | 0,523 | 0,521 | 1 |
| Usf3      | 0,0732   | -0,01161 | 0,185 | 0,238 | 1 |
| Ccdc71l   | 0,073225 | -0,03802 | 0,149 | 0,19  | 1 |

|           |          |          |       |       |   |
|-----------|----------|----------|-------|-------|---|
| Basp1     | 0,073286 | -0,08703 | 0,044 | 0,07  | 1 |
| Neil2     | 0,073396 | -0,01199 | 0,009 | 0,023 | 1 |
| Rhpn1     | 0,073396 | -0,01199 | 0,009 | 0,023 | 1 |
| Gm17552   | 0,073396 | -0,01199 | 0,009 | 0,023 | 1 |
| Tpm3-rs7  | 0,073425 | -0,01442 | 0,024 | 0,044 | 1 |
| Nck2      | 0,073457 | -0,01626 | 0,22  | 0,281 | 1 |
| Gm7347    | 0,073496 | 0,025547 | 0,026 | 0,011 | 1 |
| Diras1    | 0,073673 | 0,093966 | 0,242 | 0,205 | 1 |
| Amfr      | 0,073766 | 0,07742  | 0,75  | 0,747 | 1 |
| Snx27     | 0,073854 | 0,085953 | 0,662 | 0,648 | 1 |
| Pkdcc     | 0,073861 | 0,020223 | 0,026 | 0,011 | 1 |
| Id1       | 0,07388  | 0,026041 | 0,035 | 0,017 | 1 |
| Slitrk3   | 0,073958 | -0,00887 | 0,009 | 0,023 | 1 |
| Tmem198b  | 0,073986 | -0,0111  | 0,024 | 0,044 | 1 |
| Gm16794   | 0,074055 | -0,00222 | 0,015 | 0,032 | 1 |
| Sh3bp5l   | 0,074064 | -0,03183 | 0,332 | 0,395 | 1 |
| Mospd1    | 0,074115 | -0,02699 | 0,139 | 0,184 | 1 |
| Kif9      | 0,074278 | -0,00837 | 0,009 | 0,023 | 1 |
| Lrrc20    | 0,074335 | -0,02897 | 0,044 | 0,07  | 1 |
| Vps53     | 0,074349 | -0,04078 | 0,402 | 0,473 | 1 |
| Slc25a32  | 0,074426 | -0,0226  | 0,114 | 0,154 | 1 |
| Ccdc171   | 0,074435 | -0,01873 | 0,039 | 0,063 | 1 |
| Ube2d2a   | 0,074479 | -0,04061 | 0,923 | 0,937 | 1 |
| Spry1     | 0,074525 | 0,011462 | 0,218 | 0,285 | 1 |
| Txndc11   | 0,074529 | -0,01592 | 0,149 | 0,194 | 1 |
| Zfpm2     | 0,074569 | 0,023973 | 0,035 | 0,017 | 1 |
| Itpr1l1   | 0,074595 | 0,018442 | 0,026 | 0,011 | 1 |
| Gramd1b   | 0,074634 | -0,01871 | 0,424 | 0,496 | 1 |
| Mrps27    | 0,074656 | -0,02414 | 0,068 | 0,099 | 1 |
| Zfp961    | 0,074737 | -0,02095 | 0,064 | 0,095 | 1 |
| Tmed5     | 0,074769 | -0,01025 | 0,736 | 0,816 | 1 |
| Ddit4     | 0,074948 | 0,199983 | 0,47  | 0,468 | 1 |
| Hps6      | 0,075045 | -0,01546 | 0,039 | 0,063 | 1 |
| Emp3      | 0,075112 | 0,097224 | 0,084 | 0,057 | 1 |
| Tmem41b   | 0,075273 | 0,148104 | 0,598 | 0,612 | 1 |
| Ppp1r9a   | 0,075299 | -0,02292 | 0,433 | 0,519 | 1 |
| Taf1      | 0,075323 | 0,102328 | 0,69  | 0,705 | 1 |
| Rnf166    | 0,075334 | -0,01625 | 0,15  | 0,196 | 1 |
| Sdc2      | 0,075436 | -0,01913 | 0,026 | 0,046 | 1 |
| Kctd17    | 0,075452 | 0,10975  | 0,495 | 0,496 | 1 |
| Aff1      | 0,075538 | -0,01788 | 0,169 | 0,219 | 1 |
| Npat      | 0,075724 | -0,02584 | 0,538 | 0,618 | 1 |
| Mcoln1    | 0,075732 | -0,01842 | 0,305 | 0,371 | 1 |
| Smad3     | 0,075781 | 0,054465 | 0,127 | 0,093 | 1 |
| Zfp112    | 0,075792 | -0,02973 | 0,079 | 0,112 | 1 |
| Cep78     | 0,075813 | -0,00765 | 0,108 | 0,148 | 1 |
| Cachd1    | 0,076007 | -0,02958 | 0,187 | 0,236 | 1 |
| Ankrd46   | 0,076185 | -0,03509 | 0,642 | 0,741 | 1 |
| 2210016L2 | 0,076279 | -0,03796 | 0,697 | 0,759 | 1 |
| Sgta      | 0,076293 | -0,03397 | 0,872 | 0,907 | 1 |
| Zfp507    | 0,076353 | -0,01836 | 0,16  | 0,207 | 1 |
| Arvcf     | 0,076398 | -0,02243 | 0,068 | 0,099 | 1 |

|           |          |          |       |       |   |
|-----------|----------|----------|-------|-------|---|
| Rab34     | 0,076402 | 0,037241 | 0,046 | 0,025 | 1 |
| Gnai3     | 0,076494 | 0,073193 | 0,609 | 0,597 | 1 |
| Gm14418   | 0,076598 | -0,0189  | 0,026 | 0,046 | 1 |
| Scaf4     | 0,076617 | -0,02288 | 0,193 | 0,245 | 1 |
| Pim3      | 0,076658 | 0,044714 | 0,802 | 0,85  | 1 |
| Lamc1     | 0,076724 | -0,00752 | 0,38  | 0,464 | 1 |
| Anxa11    | 0,076786 | 0,02968  | 0,051 | 0,03  | 1 |
| Zdhhc18   | 0,076865 | 0,064848 | 0,261 | 0,217 | 1 |
| Coro7     | 0,076893 | -0,04142 | 0,264 | 0,321 | 1 |
| Kdm6b     | 0,076924 | 0,191347 | 0,217 | 0,181 | 1 |
| Bnip1     | 0,076966 | -0,00922 | 0,116 | 0,156 | 1 |
| Gm7324    | 0,07699  | -0,01932 | 0,017 | 0,034 | 1 |
| Zfp472    | 0,077054 | -0,02686 | 0,075 | 0,108 | 1 |
| Lekr1     | 0,077159 | -0,02947 | 0,128 | 0,169 | 1 |
| A830005F2 | 0,077248 | -0,01502 | 0,017 | 0,034 | 1 |
| H2afy2    | 0,07726  | -0,02285 | 0,068 | 0,099 | 1 |
| Zfp398    | 0,077361 | -0,01393 | 0,176 | 0,226 | 1 |
| Fto       | 0,077488 | 0,104239 | 0,646 | 0,656 | 1 |
| B4galt7   | 0,077538 | -0,01975 | 0,099 | 0,137 | 1 |
| Hnrnpul1  | 0,077656 | 0,108438 | 0,617 | 0,614 | 1 |
| Ist1      | 0,077726 | -0,0224  | 0,527 | 0,637 | 1 |
| Znfx1     | 0,077751 | -0,01457 | 0,363 | 0,443 | 1 |
| Exog      | 0,077902 | -0,02578 | 0,077 | 0,11  | 1 |
| Tbc1d2b   | 0,078248 | 0,027633 | 0,051 | 0,03  | 1 |
| Pard6g    | 0,078314 | 0,055858 | 0,086 | 0,059 | 1 |
| Uggt1     | 0,078318 | -0,01822 | 0,281 | 0,346 | 1 |
| Skida1    | 0,078325 | -0,01322 | 0,017 | 0,034 | 1 |
| Ccnk      | 0,078606 | -0,03422 | 0,306 | 0,367 | 1 |
| Ipo11     | 0,07869  | -0,02595 | 0,152 | 0,196 | 1 |
| 2900060B: | 0,078953 | 0,040393 | 0,07  | 0,044 | 1 |
| Ipk1      | 0,079041 | -0,01619 | 0,45  | 0,546 | 1 |
| Gm20300   | 0,079043 | -0,01515 | 0,323 | 0,388 | 1 |
| Cstf2     | 0,079173 | -0,03628 | 0,272 | 0,327 | 1 |
| Pcdhgb4   | 0,079187 | -0,02369 | 0,07  | 0,101 | 1 |
| Zfp207    | 0,079233 | -0,04019 | 0,628 | 0,709 | 1 |
| Capns1    | 0,079436 | -0,02122 | 0,978 | 0,981 | 1 |
| Phactr4   | 0,079478 | -0,03061 | 0,483 | 0,568 | 1 |
| Gpr158    | 0,079598 | -0,0169  | 0,028 | 0,049 | 1 |
| Pdzd9     | 0,079655 | -0,01539 | 0,006 | 0,017 | 1 |
| Nckap1    | 0,079745 | 0,076096 | 0,82  | 0,814 | 1 |
| Vps11     | 0,079828 | -0,01975 | 0,33  | 0,401 | 1 |
| Grm4      | 0,079863 | -0,01563 | 0,006 | 0,017 | 1 |
| 2810442N: | 0,079961 | -0,01125 | 0,006 | 0,017 | 1 |
| Cenpu     | 0,079961 | -0,01125 | 0,006 | 0,017 | 1 |
| Lrrc73    | 0,079961 | -0,01125 | 0,006 | 0,017 | 1 |
| Celf4     | 0,079961 | -0,01125 | 0,006 | 0,017 | 1 |
| Zfp39     | 0,079999 | -0,0189  | 0,028 | 0,049 | 1 |
| Tesk1     | 0,080111 | -0,03405 | 0,189 | 0,234 | 1 |
| Blm       | 0,080168 | -0,02592 | 0,088 | 0,122 | 1 |
| Osbpl11   | 0,08017  | -0,03725 | 0,174 | 0,219 | 1 |
| Trim11    | 0,080215 | -0,03958 | 0,154 | 0,196 | 1 |
| Sesn1     | 0,080222 | -0,02756 | 0,18  | 0,226 | 1 |

|           |          |          |       |       |   |
|-----------|----------|----------|-------|-------|---|
| Tbl1xr1   | 0,080251 | 0,000474 | 0,462 | 0,568 | 1 |
| Ncaph2    | 0,080278 | -0,03634 | 0,363 | 0,432 | 1 |
| 6030443JC | 0,080378 | -0,01667 | 0,028 | 0,049 | 1 |
| Gak       | 0,080385 | 0,101242 | 0,31  | 0,281 | 1 |
| Neo1      | 0,080458 | 0,091081 | 0,78  | 0,783 | 1 |
| Pcdhb5    | 0,080514 | 0,02409  | 0,022 | 0,008 | 1 |
| Rgs16     | 0,080517 | 0,054803 | 0,088 | 0,059 | 1 |
| Arap1     | 0,080547 | 0,083882 | 0,31  | 0,272 | 1 |
| Clhc1     | 0,080582 | -0,00786 | 0,006 | 0,017 | 1 |
| Gas1      | 0,080582 | -0,00786 | 0,006 | 0,017 | 1 |
| Efhd2     | 0,080611 | 0,071903 | 0,171 | 0,135 | 1 |
| E430018J2 | 0,080624 | -0,01698 | 0,042 | 0,068 | 1 |
| Atp6v0a1  | 0,080686 | 0,098865 | 0,615 | 0,612 | 1 |
| Spsb3     | 0,08078  | -0,02027 | 0,277 | 0,335 | 1 |
| Tmem217   | 0,080788 | -0,00579 | 0,006 | 0,017 | 1 |
| Gm16192   | 0,080788 | -0,00942 | 0,006 | 0,017 | 1 |
| Gm39214   | 0,080788 | -0,00942 | 0,006 | 0,017 | 1 |
| Gm46440   | 0,080788 | -0,00942 | 0,006 | 0,017 | 1 |
| 1700105P  | 0,080788 | -0,00942 | 0,006 | 0,017 | 1 |
| Gm10655   | 0,080857 | 0,022313 | 0,022 | 0,008 | 1 |
| Stard10   | 0,080929 | -0,02147 | 0,268 | 0,329 | 1 |
| Nova1     | 0,080968 | -0,00625 | 0,226 | 0,283 | 1 |
| Pcnp      | 0,081033 | 0,073693 | 0,967 | 0,954 | 1 |
| Sigmar1   | 0,081203 | -0,02835 | 0,185 | 0,232 | 1 |
| Exoc6     | 0,081325 | -0,01711 | 0,136 | 0,179 | 1 |
| Cnot2     | 0,081331 | 0,009838 | 0,336 | 0,407 | 1 |
| Zscan29   | 0,081478 | -0,03227 | 0,125 | 0,165 | 1 |
| Zranb3    | 0,081502 | -0,00977 | 0,04  | 0,065 | 1 |
| Prmt7     | 0,081543 | -0,03275 | 0,196 | 0,245 | 1 |
| Sephs1    | 0,081668 | -0,0299  | 0,152 | 0,196 | 1 |
| Nudt21    | 0,081673 | -0,01619 | 0,455 | 0,549 | 1 |
| Gm48619   | 0,081709 | -0,02268 | 0,029 | 0,051 | 1 |
| Gdi1      | 0,081786 | 0,066015 | 0,914 | 0,924 | 1 |
| Brwd1     | 0,081803 | 0,012307 | 0,466 | 0,572 | 1 |
| Irf2bpl   | 0,081825 | 0,130308 | 0,301 | 0,272 | 1 |
| Yipf2     | 0,081847 | -0,02355 | 0,24  | 0,297 | 1 |
| Bnip2     | 0,081894 | 0,000122 | 0,308 | 0,384 | 1 |
| Wbp2      | 0,082085 | -0,03771 | 0,967 | 0,983 | 1 |
| Nagk      | 0,082202 | 0,000442 | 0,272 | 0,342 | 1 |
| Tcaf1     | 0,082216 | -0,01754 | 0,572 | 0,656 | 1 |
| Wasl      | 0,082363 | 0,084194 | 0,626 | 0,608 | 1 |
| Tubb4b    | 0,082409 | 0,004658 | 0,587 | 0,671 | 1 |
| Acad9     | 0,08243  | -0,03306 | 0,202 | 0,249 | 1 |
| E430024I0 | 0,082562 | -0,02028 | 0,05  | 0,076 | 1 |
| Phykpl    | 0,082584 | 0,075353 | 0,156 | 0,12  | 1 |
| Zfp446    | 0,082586 | -0,03169 | 0,105 | 0,141 | 1 |
| Kras      | 0,082604 | 0,103976 | 0,508 | 0,511 | 1 |
| Lonp1     | 0,082696 | 0,010308 | 0,319 | 0,405 | 1 |
| Slc25a36  | 0,08271  | -0,01982 | 0,418 | 0,517 | 1 |
| Efcc1     | 0,082787 | 0,075816 | 0,204 | 0,167 | 1 |
| Lrrc61    | 0,082903 | -0,03236 | 0,165 | 0,209 | 1 |
| Agbl5     | 0,082989 | -0,01816 | 0,011 | 0,025 | 1 |

|           |          |          |       |       |   |
|-----------|----------|----------|-------|-------|---|
| Sfxn5     | 0,083252 | -0,00978 | 0,136 | 0,179 | 1 |
| Rgs2      | 0,083257 | 0,018367 | 0,095 | 0,065 | 1 |
| Stx4a     | 0,083308 | 0,090319 | 0,826 | 0,804 | 1 |
| Actr10    | 0,083387 | -0,03325 | 0,683 | 0,783 | 1 |
| Jdp2      | 0,083394 | -0,02997 | 0,347 | 0,411 | 1 |
| Rita1     | 0,083409 | -0,02346 | 0,084 | 0,118 | 1 |
| Fam220a   | 0,083419 | 0,011007 | 0,442 | 0,557 | 1 |
| Spry3     | 0,083486 | -0,01611 | 0,011 | 0,025 | 1 |
| Gtf2h4    | 0,083497 | -0,02835 | 0,101 | 0,137 | 1 |
| Psmc2     | 0,083553 | -0,04223 | 0,813 | 0,873 | 1 |
| Vps9d1    | 0,083591 | -0,01504 | 0,248 | 0,306 | 1 |
| Cyfp2     | 0,083597 | 0,083565 | 0,328 | 0,285 | 1 |
| Fbxo3     | 0,083665 | -0,01847 | 0,281 | 0,348 | 1 |
| 9530082P  | 0,083684 | -0,02158 | 0,048 | 0,074 | 1 |
| Brf1      | 0,083711 | -0,00066 | 0,29  | 0,354 | 1 |
| Prpf18    | 0,083757 | -0,01921 | 0,295 | 0,365 | 1 |
| Nmnat1    | 0,083777 | -0,01984 | 0,048 | 0,074 | 1 |
| C030037D  | 0,083985 | -0,01405 | 0,011 | 0,025 | 1 |
| Gm47551   | 0,084059 | 0,021071 | 0,031 | 0,015 | 1 |
| Supv311   | 0,084103 | -0,01553 | 0,079 | 0,112 | 1 |
| Nin       | 0,084153 | 0,073266 | 0,134 | 0,101 | 1 |
| Gm36266   | 0,084247 | -0,05682 | 0,011 | 0,025 | 1 |
| N4bp2l2   | 0,084362 | 0,113976 | 0,628 | 0,635 | 1 |
| Nol12     | 0,084413 | -0,00284 | 0,277 | 0,346 | 1 |
| Slc35a3   | 0,084529 | -0,02935 | 0,231 | 0,283 | 1 |
| Narf      | 0,084622 | -0,01946 | 0,306 | 0,373 | 1 |
| Cep126    | 0,084732 | -0,01606 | 0,029 | 0,051 | 1 |
| Bysl      | 0,084737 | -0,02936 | 0,15  | 0,192 | 1 |
| Cdk10     | 0,08479  | -0,0279  | 0,158 | 0,203 | 1 |
| Acat3     | 0,084999 | -0,01224 | 0,011 | 0,025 | 1 |
| Galnt10   | 0,085025 | -0,01325 | 0,127 | 0,169 | 1 |
| Txlna     | 0,085214 | -0,03349 | 0,539 | 0,633 | 1 |
| Mtrf1l    | 0,085285 | -0,02522 | 0,117 | 0,156 | 1 |
| Zfp956    | 0,085395 | -0,01335 | 0,029 | 0,051 | 1 |
| Tubgcp3   | 0,085571 | -0,01317 | 0,206 | 0,259 | 1 |
| Mtfmt     | 0,08569  | -0,02366 | 0,09  | 0,124 | 1 |
| Ltbp4     | 0,085753 | 0,051566 | 0,048 | 0,027 | 1 |
| Tusc1     | 0,085769 | -0,02006 | 0,048 | 0,074 | 1 |
| Eif4enif1 | 0,085816 | -0,00794 | 0,262 | 0,327 | 1 |
| Ppif      | 0,085836 | -0,022   | 0,09  | 0,124 | 1 |
| Ank2      | 0,085838 | -0,03855 | 0,998 | 0,994 | 1 |
| Galk2     | 0,085875 | -0,02487 | 0,099 | 0,135 | 1 |
| Fuk       | 0,085986 | -0,02438 | 0,055 | 0,082 | 1 |
| Zbed4     | 0,086005 | -0,03459 | 0,079 | 0,11  | 1 |
| BC065403  | 0,086022 | -0,00862 | 0,011 | 0,025 | 1 |
| Gm43666   | 0,08613  | 0,014271 | 0,011 | 0,002 | 1 |
| Gm47319   | 0,08613  | 0,014271 | 0,011 | 0,002 | 1 |
| Cacna1b   | 0,08613  | 0,021466 | 0,011 | 0,002 | 1 |
| Lag3      | 0,08613  | 0,017875 | 0,011 | 0,002 | 1 |
| Tmem51os  | 0,08613  | 0,016075 | 0,011 | 0,002 | 1 |
| Ung       | 0,08613  | 0,019672 | 0,011 | 0,002 | 1 |
| Tagln3    | 0,086162 | -0,01215 | 0,018 | 0,036 | 1 |

|           |          |          |       |       |   |
|-----------|----------|----------|-------|-------|---|
| Gm12925   | 0,086266 | 0,016075 | 0,011 | 0,002 | 1 |
| Tagln     | 0,086266 | 0,012465 | 0,011 | 0,002 | 1 |
| Ttll12    | 0,086333 | -0,01811 | 0,099 | 0,135 | 1 |
| 2310030G  | 0,086403 | 0,014271 | 0,011 | 0,002 | 1 |
| Ackr1     | 0,086403 | 0,010655 | 0,011 | 0,002 | 1 |
| Gm14762   | 0,086403 | 0,010655 | 0,011 | 0,002 | 1 |
| Gm15728   | 0,086403 | 0,010655 | 0,011 | 0,002 | 1 |
| Gm26847   | 0,086403 | 0,010655 | 0,011 | 0,002 | 1 |
| 1810028FC | 0,086403 | 0,010655 | 0,011 | 0,002 | 1 |
| Sphk1     | 0,086403 | 0,010655 | 0,011 | 0,002 | 1 |
| G630018N  | 0,086403 | 0,010655 | 0,011 | 0,002 | 1 |
| Dpysl3    | 0,086403 | 0,010655 | 0,011 | 0,002 | 1 |
| Pcgf1     | 0,086476 | -0,02117 | 0,088 | 0,122 | 1 |
| Ap1b1     | 0,086518 | -0,01519 | 0,194 | 0,247 | 1 |
| Olf2l2    | 0,086539 | 0,008842 | 0,011 | 0,002 | 1 |
| Gm34776   | 0,086547 | -0,02201 | 0,051 | 0,078 | 1 |
| Tpx2      | 0,086626 | -0,00887 | 0,011 | 0,025 | 1 |
| Mlh1      | 0,086668 | -0,02257 | 0,139 | 0,181 | 1 |
| Plekha2   | 0,086684 | 0,11469  | 0,251 | 0,219 | 1 |
| Sugp2     | 0,086761 | -0,01037 | 0,194 | 0,245 | 1 |
| Srrd      | 0,086766 | -0,03752 | 0,156 | 0,196 | 1 |
| Hdac4     | 0,086781 | 0,114123 | 0,325 | 0,297 | 1 |
| Ocll1     | 0,086799 | -0,014   | 0,143 | 0,188 | 1 |
| Blmh      | 0,086807 | -0,00914 | 0,49  | 0,58  | 1 |
| D10Wsu10  | 0,086821 | 0,051525 | 0,431 | 0,521 | 1 |
| Ociad2    | 0,086883 | 0,024407 | 0,018 | 0,006 | 1 |
| Rrp7a     | 0,086906 | -0,00295 | 0,446 | 0,544 | 1 |
| Tmem117   | 0,086931 | -0,01226 | 0,44  | 0,536 | 1 |
| Rnf113a1  | 0,087055 | -0,00862 | 0,011 | 0,025 | 1 |
| Nol6      | 0,087177 | -0,0099  | 0,167 | 0,215 | 1 |
| Scx       | 0,087186 | 0,020842 | 0,018 | 0,006 | 1 |
| Psmb4     | 0,087187 | -0,02578 | 0,947 | 0,96  | 1 |
| P4ha1     | 0,087208 | 0,005055 | 0,332 | 0,409 | 1 |
| Arf3      | 0,087254 | 0,107663 | 0,433 | 0,409 | 1 |
| S100pbb   | 0,087295 | -0,01647 | 0,189 | 0,241 | 1 |
| Chl1      | 0,08749  | 0,019055 | 0,018 | 0,006 | 1 |
| 4831440D  | 0,08749  | 0,019055 | 0,018 | 0,006 | 1 |
| Rarg      | 0,08749  | 0,022626 | 0,018 | 0,006 | 1 |
| Ggps1     | 0,087535 | -0,02354 | 0,417 | 0,492 | 1 |
| Traip     | 0,087577 | -0,00374 | 0,011 | 0,025 | 1 |
| Riok1     | 0,087663 | 0,011751 | 0,301 | 0,376 | 1 |
| Lasp1     | 0,087665 | 0,024285 | 0,037 | 0,019 | 1 |
| Atg7      | 0,087793 | -0,00368 | 0,224 | 0,283 | 1 |
| Dusp6     | 0,087794 | 0,01547  | 0,018 | 0,006 | 1 |
| Olf2l2    | 0,087794 | 0,01547  | 0,018 | 0,006 | 1 |
| Spef1     | 0,087794 | 0,017264 | 0,018 | 0,006 | 1 |
| Ezr       | 0,087794 | 0,017264 | 0,018 | 0,006 | 1 |
| Mtch1     | 0,087868 | 0,052034 | 0,978 | 0,964 | 1 |
| Crcp      | 0,087907 | -0,03067 | 0,174 | 0,219 | 1 |
| Slc36a4   | 0,087926 | -0,01903 | 0,185 | 0,232 | 1 |
| Tmem94    | 0,088079 | -0,02261 | 0,11  | 0,148 | 1 |
| Sike1     | 0,088353 | -0,01822 | 0,356 | 0,443 | 1 |



|          |          |          |       |       |   |
|----------|----------|----------|-------|-------|---|
| Sorcs2   | 0,088513 | 0,01517  | 0,018 | 0,006 | 1 |
| Cacfd1   | 0,08854  | -0,03038 | 0,257 | 0,31  | 1 |
| Zfp874b  | 0,088613 | -0,01411 | 0,149 | 0,192 | 1 |
| Gm44777  | 0,088676 | -0,0166  | 0,05  | 0,076 | 1 |
| Nudt3    | 0,088859 | 0,075018 | 0,837 | 0,812 | 1 |
| Lims2    | 0,088973 | -0,03006 | 0,231 | 0,283 | 1 |
| Ube2l6   | 0,089027 | -0,00809 | 0,018 | 0,006 | 1 |
| Vmn1r12  | 0,089128 | 0,011286 | 0,018 | 0,006 | 1 |
| Sltm     | 0,089271 | 0,096457 | 0,787 | 0,774 | 1 |
| Plk4     | 0,08936  | -0,05671 | 0,068 | 0,097 | 1 |
| Atp8b1   | 0,089361 | -0,01469 | 0,218 | 0,274 | 1 |
| Rnf123   | 0,089382 | -0,0288  | 0,169 | 0,213 | 1 |
| Dzip1    | 0,089426 | 0,040506 | 0,121 | 0,089 | 1 |
| Rnd3     | 0,089467 | 0,0015   | 0,16  | 0,205 | 1 |
| Smad1    | 0,089484 | -0,01236 | 0,253 | 0,312 | 1 |
| Rasl11b  | 0,089624 | -0,00053 | 0,358 | 0,43  | 1 |
| Tesk2    | 0,089761 | -0,02904 | 0,299 | 0,357 | 1 |
| Ccser2   | 0,089764 | 0,120825 | 0,514 | 0,519 | 1 |
| Vps13a   | 0,089777 | -0,00143 | 0,29  | 0,357 | 1 |
| Kif6     | 0,089821 | -0,02794 | 0,218 | 0,27  | 1 |
| Ephb1    | 0,089882 | -0,04699 | 0,829 | 0,852 | 1 |
| Dnajc28  | 0,089915 | -0,01406 | 0,031 | 0,053 | 1 |
| Snhg18   | 0,089944 | -0,02137 | 0,055 | 0,082 | 1 |
| Ccl27a   | 0,089968 | -0,01958 | 0,033 | 0,055 | 1 |
| Inpp5b   | 0,089991 | -0,01841 | 0,167 | 0,213 | 1 |
| Slc46a2  | 0,089995 | 0,024787 | 0,042 | 0,023 | 1 |
| Fkbp9    | 0,089998 | 0,053851 | 0,207 | 0,169 | 1 |
| Hinfp    | 0,09002  | -0,03742 | 0,161 | 0,203 | 1 |
| Fitm2    | 0,090142 | -0,01691 | 0,169 | 0,215 | 1 |
| Os9      | 0,090176 | 0,068926 | 0,752 | 0,741 | 1 |
| Fstl3    | 0,09024  | 0,041023 | 0,042 | 0,023 | 1 |
| Aldh9a1  | 0,090288 | -0,02981 | 0,391 | 0,468 | 1 |
| Aida     | 0,090351 | -0,01128 | 0,31  | 0,369 | 1 |
| Ikkg     | 0,090406 | -0,02493 | 0,136 | 0,177 | 1 |
| Otub2    | 0,090509 | -0,0166  | 0,053 | 0,08  | 1 |
| Cacna1a  | 0,09055  | 0,067194 | 0,086 | 0,059 | 1 |
| Zfp395   | 0,090611 | 0,089225 | 0,261 | 0,224 | 1 |
| Btf3l4   | 0,090631 | -0,02447 | 0,165 | 0,209 | 1 |
| Kdm6bos  | 0,090702 | 0,015772 | 0,015 | 0,004 | 1 |
| Slc22a17 | 0,090843 | -0,03339 | 0,905 | 0,935 | 1 |
| Zwilch   | 0,090847 | -0,01958 | 0,035 | 0,057 | 1 |
| Fzd1     | 0,09094  | 0,013972 | 0,015 | 0,004 | 1 |
| Gm27253  | 0,09094  | 0,013972 | 0,015 | 0,004 | 1 |
| Egln3    | 0,09094  | 0,015772 | 0,015 | 0,004 | 1 |
| Gm37768  | 0,091178 | 0,012168 | 0,015 | 0,004 | 1 |
| 9030612E | 0,091178 | 0,012168 | 0,015 | 0,004 | 1 |
| Map3k20  | 0,091416 | 0,010362 | 0,015 | 0,004 | 1 |
| Odf3l2   | 0,091416 | 0,010362 | 0,015 | 0,004 | 1 |
| Lgals9   | 0,091416 | 0,010362 | 0,015 | 0,004 | 1 |
| Vmn2r124 | 0,091416 | 0,010362 | 0,015 | 0,004 | 1 |
| Fcho2    | 0,091421 | 0,083248 | 0,78  | 0,797 | 1 |
| Il17b    | 0,091451 | -0,01667 | 0,02  | 0,038 | 1 |

|           |          |          |       |       |   |
|-----------|----------|----------|-------|-------|---|
| Cnot9     | 0,091456 | -0,02064 | 0,149 | 0,192 | 1 |
| Zfp24     | 0,091502 | 0,100226 | 0,633 | 0,639 | 1 |
| Pcdhga11  | 0,091556 | -0,02775 | 0,07  | 0,099 | 1 |
| Trpm3     | 0,091798 | -0,01037 | 0,02  | 0,038 | 1 |
| Atic      | 0,09185  | -0,00304 | 0,266 | 0,333 | 1 |
| Zfp646    | 0,092019 | -0,01046 | 0,25  | 0,312 | 1 |
| Gprasp1   | 0,092082 | 0,010441 | 0,382 | 0,466 | 1 |
| Ints11    | 0,092534 | -0,02085 | 0,176 | 0,224 | 1 |
| Gpr157    | 0,092631 | 0,027165 | 0,066 | 0,042 | 1 |
| B230354K  | 0,092696 | -0,02692 | 0,138 | 0,179 | 1 |
| Nptn      | 0,092743 | 0,081121 | 0,714 | 0,715 | 1 |
| U2af1     | 0,092775 | -0,05366 | 0,894 | 0,905 | 1 |
| Pcdhga5   | 0,092784 | -0,01683 | 0,053 | 0,08  | 1 |
| Mob3c     | 0,092793 | -0,02137 | 0,057 | 0,084 | 1 |
| Ric1      | 0,092962 | -0,02283 | 0,244 | 0,295 | 1 |
| Zfp60     | 0,093032 | 0,006527 | 0,327 | 0,397 | 1 |
| Zfp946    | 0,093036 | -0,03311 | 0,09  | 0,122 | 1 |
| Cyth3     | 0,093043 | -0,02362 | 0,198 | 0,249 | 1 |
| Pgs1      | 0,093214 | -0,01796 | 0,279 | 0,338 | 1 |
| Lmbrd2    | 0,093288 | 0,087578 | 0,594 | 0,589 | 1 |
| Mcrip1    | 0,093294 | -0,04018 | 0,828 | 0,848 | 1 |
| Pias4     | 0,093317 | -0,0038  | 0,387 | 0,47  | 1 |
| Synpo     | 0,093404 | 0,071092 | 0,246 | 0,209 | 1 |
| Gabpb1    | 0,093416 | -0,01691 | 0,103 | 0,139 | 1 |
| Gm33979   | 0,093422 | 0,023461 | 0,028 | 0,013 | 1 |
| Esf1      | 0,093422 | -0,01351 | 0,431 | 0,515 | 1 |
| Prmt5     | 0,093541 | -0,0218  | 0,193 | 0,238 | 1 |
| Mgat3     | 0,093679 | -0,00941 | 0,442 | 0,538 | 1 |
| Zfp9      | 0,093752 | 0,001366 | 0,158 | 0,205 | 1 |
| Bex2      | 0,093822 | -0,00883 | 0,02  | 0,038 | 1 |
| Gm20219   | 0,093855 | -0,01978 | 0,022 | 0,04  | 1 |
| Ndr4      | 0,093968 | -0,00257 | 0,09  | 0,124 | 1 |
| 2410002F2 | 0,093985 | -0,00588 | 0,358 | 0,439 | 1 |
| Zfp874a   | 0,094039 | -0,01705 | 0,095 | 0,131 | 1 |
| Deptor    | 0,094092 | -0,03482 | 0,22  | 0,268 | 1 |
| Srrm2     | 0,094232 | 0,065987 | 0,996 | 0,994 | 1 |
| Trim35    | 0,094361 | 0,067868 | 0,978 | 0,96  | 1 |
| Crem      | 0,094457 | -0,03002 | 0,138 | 0,177 | 1 |
| Cux2      | 0,094469 | -0,0123  | 0,15  | 0,196 | 1 |
| Dhrs13    | 0,094484 | -0,01958 | 0,037 | 0,059 | 1 |
| Notch2    | 0,094791 | 0,0443   | 0,149 | 0,114 | 1 |
| Tonsl     | 0,094949 | 0,02169  | 0,028 | 0,013 | 1 |
| Megf6     | 0,094958 | 0,022837 | 0,028 | 0,013 | 1 |
| Clcn5     | 0,094993 | -0,01766 | 0,251 | 0,308 | 1 |
| Rwdd2b    | 0,095008 | -0,01055 | 0,035 | 0,057 | 1 |
| D5Ert579  | 0,095173 | 0,08922  | 0,653 | 0,677 | 1 |
| Ghitm     | 0,095352 | -0,03746 | 0,813 | 0,831 | 1 |
| Stxbp2    | 0,095389 | -0,12868 | 0,228 | 0,276 | 1 |
| Tnrc6b    | 0,095509 | 0,067392 | 0,846 | 0,84  | 1 |
| Tcirg1    | 0,09556  | 0,084188 | 0,316 | 0,276 | 1 |
| Chmp4b    | 0,095811 | -0,03392 | 0,894 | 0,918 | 1 |
| Ubtf      | 0,09599  | 0,099455 | 0,633 | 0,631 | 1 |

|          |          |          |       |       |   |
|----------|----------|----------|-------|-------|---|
| Fbxw11   | 0,095993 | 0,11789  | 0,439 | 0,432 | 1 |
| Lcmt2    | 0,096058 | -0,0169  | 0,064 | 0,093 | 1 |
| Mtap     | 0,09608  | 0,041058 | 0,068 | 0,044 | 1 |
| Al837181 | 0,096147 | -0,02463 | 0,334 | 0,401 | 1 |
| Taf1b    | 0,096189 | -0,02398 | 0,2   | 0,247 | 1 |
| Cyb5r2   | 0,096196 | -0,0186  | 0,064 | 0,093 | 1 |
| Zfp410   | 0,096218 | -0,01406 | 0,262 | 0,319 | 1 |
| Bsdc1    | 0,096224 | -0,02249 | 0,424 | 0,506 | 1 |
| Rrp1b    | 0,096293 | -0,00495 | 0,141 | 0,186 | 1 |
| Slc25a15 | 0,09632  | -0,03019 | 0,099 | 0,133 | 1 |
| Prkar1b  | 0,096351 | -0,02224 | 0,022 | 0,04  | 1 |
| Gm14966  | 0,096413 | -0,02202 | 0,037 | 0,059 | 1 |
| Kit      | 0,096568 | 0,020561 | 0,084 | 0,057 | 1 |
| Setd4    | 0,0966   | -0,02421 | 0,037 | 0,059 | 1 |
| Pgrmc2   | 0,096786 | 0,073822 | 0,587 | 0,553 | 1 |
| Srxn1    | 0,096798 | -0,03649 | 0,183 | 0,228 | 1 |
| Ppp3cb   | 0,096858 | 0,022558 | 0,38  | 0,479 | 1 |
| Urb2     | 0,096889 | -0,01543 | 0,066 | 0,095 | 1 |
| Pnpla8   | 0,09689  | -0,0109  | 0,488 | 0,589 | 1 |
| Tigar    | 0,097109 | -0,02421 | 0,04  | 0,063 | 1 |
| Rhob     | 0,097215 | 0,076524 | 1     | 0,998 | 1 |
| Rprd1b   | 0,097264 | -0,01156 | 0,233 | 0,289 | 1 |
| Ttc41    | 0,097274 | -0,00987 | 0,013 | 0,027 | 1 |
| Tmem170b | 0,097352 | -0,01764 | 0,233 | 0,287 | 1 |
| Ube2v1   | 0,097376 | -0,02003 | 0,039 | 0,061 | 1 |
| Ankzf1   | 0,097443 | -0,01047 | 0,134 | 0,175 | 1 |
| Mboat7   | 0,097603 | 0,05624  | 0,253 | 0,211 | 1 |
| Gprasp2  | 0,097725 | -0,01675 | 0,037 | 0,059 | 1 |
| Polh     | 0,097894 | -0,00887 | 0,013 | 0,027 | 1 |
| Tm7sf2   | 0,097964 | -0,0243  | 0,084 | 0,116 | 1 |
| Il33     | 0,098107 | -0,06816 | 0,93  | 0,833 | 1 |
| Map3k21  | 0,098257 | -0,01356 | 0,007 | 0,019 | 1 |
| Gm19412  | 0,098257 | -0,01356 | 0,007 | 0,019 | 1 |
| BC024063 | 0,098278 | -0,02625 | 0,024 | 0,042 | 1 |
| Ccny     | 0,098511 | -0,01982 | 0,275 | 0,333 | 1 |
| Rab6b    | 0,098771 | 0,116241 | 0,648 | 0,637 | 1 |
| Plekhm1  | 0,098858 | 0,050901 | 0,138 | 0,105 | 1 |
| Phtf1    | 0,098912 | -0,03933 | 0,125 | 0,16  | 1 |
| Ski      | 0,098961 | 0,106685 | 0,536 | 0,54  | 1 |
| Lat2     | 0,098988 | -0,01868 | 0,024 | 0,042 | 1 |
| Pagr1a   | 0,099186 | 0,030695 | 0,081 | 0,055 | 1 |
| Rspry1   | 0,099253 | -0,00853 | 0,363 | 0,437 | 1 |
| Hddc2    | 0,099268 | -0,01175 | 0,007 | 0,019 | 1 |
| Paf1     | 0,099292 | -0,00555 | 0,356 | 0,428 | 1 |
| Nup85    | 0,099315 | -0,02494 | 0,191 | 0,236 | 1 |
| Spdl1    | 0,09938  | -0,00993 | 0,007 | 0,019 | 1 |
| Fam208b  | 0,099414 | -0,0453  | 0,29  | 0,342 | 1 |
| Bmi1     | 0,099453 | 0,11416  | 0,512 | 0,515 | 1 |
| Zfp651   | 0,099484 | 0,102481 | 0,473 | 0,464 | 1 |
| Zcchc7   | 0,099548 | 0,080081 | 0,787 | 0,816 | 1 |
| Fgfr3    | 0,099717 | -0,00786 | 0,007 | 0,019 | 1 |
| A330035P | 0,099717 | -0,00968 | 0,007 | 0,019 | 1 |

|           |          |          |       |       |   |
|-----------|----------|----------|-------|-------|---|
| 170004711 | 0,099717 | -0,00968 | 0,007 | 0,019 | 1 |
| Asb6      | 0,099736 | -0,00957 | 0,204 | 0,253 | 1 |
| Phrf1     | 0,099793 | -0,01503 | 0,281 | 0,342 | 1 |
| B3galnt2  | 0,09991  | -0,02512 | 0,081 | 0,112 | 1 |
| Akap13    | 0,099978 | -0,02485 | 0,042 | 0,065 | 1 |
| Rad9b     | 0,100054 | -0,0222  | 0,095 | 0,129 | 1 |
| Tmco3     | 0,100236 | -0,02308 | 0,558 | 0,648 | 1 |
| Lxn       | 0,100286 | -0,00993 | 0,007 | 0,019 | 1 |
| Gm43137   | 0,100286 | -0,00993 | 0,007 | 0,019 | 1 |
| Klc3      | 0,100286 | -0,00993 | 0,007 | 0,019 | 1 |
| Znhit2    | 0,100304 | -0,01847 | 0,143 | 0,184 | 1 |
| Nt5dc3    | 0,100305 | -0,00993 | 0,108 | 0,146 | 1 |
| Zfp26     | 0,10031  | -0,00852 | 0,193 | 0,243 | 1 |
| Alkbh3    | 0,100423 | -0,0127  | 0,11  | 0,148 | 1 |
| Stk24     | 0,100457 | 0,069907 | 0,217 | 0,181 | 1 |
| Srp54c    | 0,100465 | -0,02289 | 0,044 | 0,068 | 1 |
| Ndc1      | 0,100504 | -0,01442 | 0,18  | 0,228 | 1 |
| Slc20a2   | 0,100541 | -0,03806 | 0,75  | 0,795 | 1 |
| Idnk      | 0,10061  | -0,01207 | 0,211 | 0,262 | 1 |
| Dynlt1c   | 0,10074  | -0,00786 | 0,007 | 0,019 | 1 |
| Zgrf1     | 0,100786 | -0,02158 | 0,042 | 0,065 | 1 |
| Tmem47    | 0,101004 | -0,02068 | 0,024 | 0,042 | 1 |
| Baiap2    | 0,101204 | 0,044786 | 0,05  | 0,03  | 1 |
| 4930432K  | 0,101215 | -0,01489 | 0,024 | 0,042 | 1 |
| Ppp6r2    | 0,101304 | -0,0266  | 0,339 | 0,405 | 1 |
| Tti2      | 0,101366 | -0,01196 | 0,114 | 0,152 | 1 |
| Lockd     | 0,101414 | 0,022526 | 0,033 | 0,017 | 1 |
| Rhot1     | 0,101454 | -0,02312 | 0,365 | 0,432 | 1 |
| Ncoa3     | 0,101493 | 0,005318 | 0,459 | 0,563 | 1 |
| Btbd1     | 0,101632 | -0,02775 | 0,554 | 0,624 | 1 |
| Ric3      | 0,101638 | -0,02619 | 0,106 | 0,141 | 1 |
| Dpy19l4   | 0,101769 | 0,004316 | 0,349 | 0,428 | 1 |
| Trp53inp2 | 0,101797 | 0,115197 | 0,306 | 0,281 | 1 |
| Prkag3    | 0,102184 | -0,02495 | 0,015 | 0,03  | 1 |
| Usp38     | 0,1022   | -0,04487 | 0,176 | 0,217 | 1 |
| Cdr2      | 0,102229 | -0,02656 | 0,16  | 0,2   | 1 |
| Sdf4      | 0,102365 | -0,02437 | 0,864 | 0,903 | 1 |
| Rnf125    | 0,102511 | -0,01477 | 0,039 | 0,061 | 1 |
| Mpp6      | 0,102543 | -0,02114 | 0,042 | 0,065 | 1 |
| Gm16638   | 0,102627 | -0,01993 | 0,083 | 0,114 | 1 |
| Dnaaf5    | 0,102762 | -0,03404 | 0,127 | 0,162 | 1 |
| Adgrb3    | 0,102802 | -0,0247  | 0,117 | 0,154 | 1 |
| Slc38a2   | 0,102819 | 0,143458 | 0,98  | 0,964 | 1 |
| Fancm     | 0,10284  | -0,03653 | 0,112 | 0,146 | 1 |
| Sept11    | 0,102843 | 0,055142 | 0,105 | 0,076 | 1 |
| Colgalt2  | 0,102882 | 0,032693 | 0,068 | 0,044 | 1 |
| Frmd4a    | 0,103181 | 0,030076 | 0,343 | 0,42  | 1 |
| Zmiz2     | 0,10356  | 0,104758 | 0,426 | 0,403 | 1 |
| Med23     | 0,103716 | 0,066606 | 0,194 | 0,16  | 1 |
| Atp5o.1   | 0,103727 | -0,04074 | 0,934 | 0,928 | 1 |
| Dcaf11    | 0,103776 | -0,01298 | 0,407 | 0,485 | 1 |
| Usp15     | 0,103823 | 0,103224 | 0,615 | 0,624 | 1 |

|           |          |          |       |       |   |
|-----------|----------|----------|-------|-------|---|
| Tspan6    | 0,103854 | 0,024846 | 0,068 | 0,044 | 1 |
| Fance     | 0,103879 | -0,03113 | 0,261 | 0,312 | 1 |
| Sfxn3     | 0,103886 | 0,044632 | 0,13  | 0,099 | 1 |
| Sesn3     | 0,103976 | 0,012581 | 0,305 | 0,369 | 1 |
| Rab43     | 0,104095 | 0,024787 | 0,044 | 0,025 | 1 |
| Zfp551    | 0,104113 | -0,01868 | 0,026 | 0,044 | 1 |
| Tmem214   | 0,104151 | 0,02736  | 0,281 | 0,352 | 1 |
| Mllt10    | 0,104228 | -0,01409 | 0,343 | 0,409 | 1 |
| Fam13a    | 0,104391 | -0,00953 | 0,039 | 0,061 | 1 |
| Grik1     | 0,104596 | -0,00605 | 0,217 | 0,268 | 1 |
| Cep55     | 0,104615 | -0,01307 | 0,004 | 0,013 | 1 |
| Atp11c    | 0,104626 | -0,03542 | 0,139 | 0,177 | 1 |
| Tnfrsf22  | 0,104731 | 0,020458 | 0,039 | 0,021 | 1 |
| Foxo6     | 0,104836 | 0,039437 | 0,083 | 0,057 | 1 |
| Snw1      | 0,104864 | -0,0236  | 0,787 | 0,829 | 1 |
| Zmym5     | 0,104881 | 0,132817 | 0,506 | 0,519 | 1 |
| Atm       | 0,104931 | -0,01913 | 0,215 | 0,266 | 1 |
| Pgrmc1    | 0,105007 | -0,02305 | 0,694 | 0,762 | 1 |
| Rcor1     | 0,10501  | -0,01566 | 0,198 | 0,247 | 1 |
| Fbxl5     | 0,105105 | 0,082649 | 0,794 | 0,795 | 1 |
| Gm20186   | 0,105106 | -0,00883 | 0,024 | 0,042 | 1 |
| Rgp1      | 0,105115 | -0,02695 | 0,132 | 0,169 | 1 |
| Acbd7     | 0,105211 | -0,00892 | 0,004 | 0,013 | 1 |
| Chp2      | 0,105211 | -0,00892 | 0,004 | 0,013 | 1 |
| Gm45846   | 0,105211 | -0,00892 | 0,004 | 0,013 | 1 |
| Gm20687   | 0,105211 | -0,00892 | 0,004 | 0,013 | 1 |
| Fbxo48    | 0,105211 | -0,00892 | 0,004 | 0,013 | 1 |
| 5430425K  | 0,105211 | -0,00892 | 0,004 | 0,013 | 1 |
| Lgi1      | 0,105211 | -0,00892 | 0,004 | 0,013 | 1 |
| Nup214    | 0,105255 | -0,00138 | 0,312 | 0,382 | 1 |
| Trmt10b   | 0,105285 | -0,03087 | 0,222 | 0,27  | 1 |
| Zswim8    | 0,105388 | -0,02094 | 0,383 | 0,456 | 1 |
| Gm15860   | 0,105396 | -0,0162  | 0,026 | 0,044 | 1 |
| Nop14     | 0,105397 | 0,021035 | 0,286 | 0,354 | 1 |
| Ovca2     | 0,105437 | -0,01372 | 0,044 | 0,068 | 1 |
| Tspan14   | 0,105544 | 0,09005  | 0,631 | 0,652 | 1 |
| Rcor2     | 0,105548 | 0,02908  | 0,024 | 0,011 | 1 |
| Lrrtm3    | 0,105583 | -0,01683 | 0,046 | 0,07  | 1 |
| C1galt1   | 0,105689 | -0,0207  | 0,189 | 0,234 | 1 |
| Syne4     | 0,105814 | -0,00917 | 0,004 | 0,013 | 1 |
| Klhl10    | 0,105814 | -0,00917 | 0,004 | 0,013 | 1 |
| Proser3   | 0,105945 | -0,01592 | 0,046 | 0,07  | 1 |
| Lrp8      | 0,105955 | 0,030516 | 0,024 | 0,011 | 1 |
| Csf2ra    | 0,105958 | -0,01258 | 0,152 | 0,194 | 1 |
| Pfkfb2    | 0,105977 | -0,01296 | 0,07  | 0,099 | 1 |
| Luc7l3    | 0,105994 | -0,0487  | 0,925 | 0,932 | 1 |
| Selenoi   | 0,106016 | -0,01778 | 0,323 | 0,386 | 1 |
| 1700029l1 | 0,106051 | 0,022001 | 0,024 | 0,011 | 1 |
| Gm27003   | 0,106115 | -0,00709 | 0,004 | 0,013 | 1 |
| Gjb2      | 0,106115 | -0,00709 | 0,004 | 0,013 | 1 |
| Itga3     | 0,106115 | -0,00709 | 0,004 | 0,013 | 1 |
| Ccdc150   | 0,106149 | 0,005489 | 0,006 | 0     | 1 |

|           |          |          |       |   |   |
|-----------|----------|----------|-------|---|---|
| Gm38037   | 0,106149 | 0,005489 | 0,006 | 0 | 1 |
| Spaca9    | 0,106149 | 0,005489 | 0,006 | 0 | 1 |
| 9530027JC | 0,106149 | 0,005489 | 0,006 | 0 | 1 |
| P2ry14    | 0,106149 | 0,005489 | 0,006 | 0 | 1 |
| Riid1     | 0,106149 | 0,005489 | 0,006 | 0 | 1 |
| Cd72      | 0,106149 | 0,005489 | 0,006 | 0 | 1 |
| Spag8     | 0,106149 | 0,005489 | 0,006 | 0 | 1 |
| Gm26566   | 0,106149 | 0,005489 | 0,006 | 0 | 1 |
| Cdkn2b    | 0,106149 | 0,005489 | 0,006 | 0 | 1 |
| Dnali1    | 0,106149 | 0,005489 | 0,006 | 0 | 1 |
| Slc25a34  | 0,106149 | 0,005489 | 0,006 | 0 | 1 |
| Gm42902   | 0,106149 | 0,005489 | 0,006 | 0 | 1 |
| Met       | 0,106149 | 0,005489 | 0,006 | 0 | 1 |
| Akr1b8    | 0,106149 | 0,005489 | 0,006 | 0 | 1 |
| D7Ert128  | 0,106149 | 0,005489 | 0,006 | 0 | 1 |
| 4930558N  | 0,106149 | 0,005489 | 0,006 | 0 | 1 |
| Shank2    | 0,106149 | 0,005489 | 0,006 | 0 | 1 |
| Ces2b     | 0,106149 | 0,005489 | 0,006 | 0 | 1 |
| Cacna1d   | 0,106149 | 0,005489 | 0,006 | 0 | 1 |
| Dhrs2     | 0,106149 | 0,005489 | 0,006 | 0 | 1 |
| Tcf7      | 0,106149 | 0,005489 | 0,006 | 0 | 1 |
| Apoh      | 0,106149 | 0,005489 | 0,006 | 0 | 1 |
| Hist1h2ak | 0,106149 | 0,005489 | 0,006 | 0 | 1 |
| 170009910 | 0,106149 | 0,005489 | 0,006 | 0 | 1 |
| Efcab11   | 0,106149 | 0,005489 | 0,006 | 0 | 1 |
| 9330161LC | 0,106149 | 0,005489 | 0,006 | 0 | 1 |
| Hoxc4     | 0,106149 | 0,005489 | 0,006 | 0 | 1 |
| Itga5     | 0,106149 | 0,005489 | 0,006 | 0 | 1 |
| AC166832. | 0,106149 | 0,005489 | 0,006 | 0 | 1 |
| Sept5     | 0,106149 | 0,005489 | 0,006 | 0 | 1 |
| Crb3      | 0,106149 | 0,005489 | 0,006 | 0 | 1 |
| Map3k8    | 0,106149 | 0,005489 | 0,006 | 0 | 1 |
| Ppp1r32   | 0,106149 | 0,005489 | 0,006 | 0 | 1 |
| Cfap43    | 0,106149 | 0,005489 | 0,006 | 0 | 1 |
| Angptl3   | 0,10615  | 0,012762 | 0,006 | 0 | 1 |
| Lacc1     | 0,10615  | 0,010949 | 0,006 | 0 | 1 |
| Col4a4    | 0,10615  | 0,009132 | 0,006 | 0 | 1 |
| Palmd     | 0,10615  | 0,009132 | 0,006 | 0 | 1 |
| P2ry2     | 0,10615  | 0,009132 | 0,006 | 0 | 1 |
| Stx11     | 0,10615  | 0,009132 | 0,006 | 0 | 1 |
| Tgfbr3l   | 0,10615  | 0,009132 | 0,006 | 0 | 1 |
| Gm15222   | 0,10615  | 0,009132 | 0,006 | 0 | 1 |
| Kif23     | 0,10615  | 0,009132 | 0,006 | 0 | 1 |
| AC153140. | 0,10615  | 0,009132 | 0,006 | 0 | 1 |
| Ly6g5b    | 0,10615  | 0,009132 | 0,006 | 0 | 1 |
| Catip     | 0,10615  | 0,007313 | 0,006 | 0 | 1 |
| Gm26683   | 0,10615  | 0,007313 | 0,006 | 0 | 1 |
| Gli2      | 0,10615  | 0,007313 | 0,006 | 0 | 1 |
| Fcgr2b    | 0,10615  | 0,007313 | 0,006 | 0 | 1 |
| Nr6a1os   | 0,10615  | 0,007313 | 0,006 | 0 | 1 |
| Hfm1      | 0,10615  | 0,007313 | 0,006 | 0 | 1 |
| Vmn1r47   | 0,10615  | 0,007313 | 0,006 | 0 | 1 |

|           |          |          |       |       |   |
|-----------|----------|----------|-------|-------|---|
| Apoc4     | 0,10615  | 0,007313 | 0,006 | 0     | 1 |
| Omp       | 0,10615  | 0,007313 | 0,006 | 0     | 1 |
| Ctrl      | 0,10615  | 0,007313 | 0,006 | 0     | 1 |
| Olfr18    | 0,10615  | 0,007313 | 0,006 | 0     | 1 |
| Ccl28     | 0,10615  | 0,007313 | 0,006 | 0     | 1 |
| D630044L  | 0,10615  | 0,007313 | 0,006 | 0     | 1 |
| Arhgap28  | 0,10615  | 0,007313 | 0,006 | 0     | 1 |
| Gldc      | 0,10615  | 0,007313 | 0,006 | 0     | 1 |
| Eno4      | 0,10615  | 0,007313 | 0,006 | 0     | 1 |
| Gm42047   | 0,10615  | 0,034268 | 0,006 | 0     | 1 |
| Hcn3      | 0,10615  | 0,010949 | 0,006 | 0     | 1 |
| 9930021JC | 0,106235 | 0,012662 | 0,534 | 0,635 | 1 |
| Sdc3      | 0,106426 | -0,01093 | 0,015 | 0,03  | 1 |
| Arhgap19  | 0,106426 | -0,00733 | 0,015 | 0,03  | 1 |
| Nipa2     | 0,106429 | 0,003522 | 0,218 | 0,274 | 1 |
| Ttc37     | 0,10646  | -0,0038  | 0,193 | 0,243 | 1 |
| Gm12840   | 0,106556 | 0,020223 | 0,024 | 0,011 | 1 |
| Parp11    | 0,106601 | -0,02375 | 0,051 | 0,076 | 1 |
| Ticam1    | 0,106654 | 0,036701 | 0,07  | 0,046 | 1 |
| Rfx4      | 0,106722 | -0,00735 | 0,004 | 0,013 | 1 |
| Rbbp7     | 0,106788 | 0,095829 | 0,549 | 0,544 | 1 |
| Gaa       | 0,106836 | 0,09021  | 0,422 | 0,399 | 1 |
| Camk1     | 0,106879 | -0,03709 | 0,36  | 0,416 | 1 |
| Rpl12     | 0,107013 | 0,105395 | 0,956 | 0,935 | 1 |
| Hdac2     | 0,107036 | -0,02661 | 0,308 | 0,369 | 1 |
| Lrrn1     | 0,107043 | -0,04248 | 0,906 | 0,932 | 1 |
| Max       | 0,107125 | 0,002411 | 0,387 | 0,468 | 1 |
| Skp2      | 0,107146 | -0,01843 | 0,07  | 0,099 | 1 |
| Ubxn2b    | 0,107161 | -0,01401 | 0,158 | 0,2   | 1 |
| Tmpo      | 0,107168 | 0,103123 | 0,563 | 0,561 | 1 |
| Bcl2l1    | 0,107235 | -0,0218  | 0,71  | 0,793 | 1 |
| Arhgef37  | 0,107511 | -0,01788 | 0,048 | 0,072 | 1 |
| Zfp108    | 0,107547 | 0,019245 | 0,044 | 0,025 | 1 |
| Mid1      | 0,107569 | 0,01487  | 0,024 | 0,011 | 1 |
| A930024N  | 0,107678 | 0,02523  | 0,024 | 0,011 | 1 |
| D3Ert254  | 0,107699 | -0,02101 | 0,121 | 0,158 | 1 |
| Gm27010   | 0,107953 | -0,01475 | 0,079 | 0,11  | 1 |
| Nup188    | 0,108208 | 0,042423 | 0,121 | 0,091 | 1 |
| Tmed9     | 0,108241 | -0,02094 | 0,89  | 0,918 | 1 |
| Traf3ip1  | 0,108365 | -0,00763 | 0,116 | 0,152 | 1 |
| Prkar2b   | 0,108377 | -0,00758 | 0,015 | 0,03  | 1 |
| Yars      | 0,108444 | -0,0087  | 0,325 | 0,39  | 1 |
| Arhgap17  | 0,108591 | -0,01302 | 0,378 | 0,456 | 1 |
| Mecp2     | 0,108778 | 0,10011  | 0,683 | 0,711 | 1 |
| Kdelc1    | 0,108817 | -0,01719 | 0,086 | 0,118 | 1 |
| Kcnh2     | 0,109028 | -0,00733 | 0,015 | 0,03  | 1 |
| Slc16a7   | 0,109145 | 0,107553 | 0,369 | 0,348 | 1 |
| Wwox      | 0,109272 | -0,01777 | 0,231 | 0,283 | 1 |
| Ulk1      | 0,109424 | 0,073019 | 0,25  | 0,213 | 1 |
| Smpd4     | 0,109665 | 0,066663 | 0,15  | 0,118 | 1 |
| Gm39121   | 0,109693 | -0,02886 | 0,062 | 0,089 | 1 |
| ldh2      | 0,110056 | -0,02249 | 0,25  | 0,3   | 1 |

|           |          |          |       |       |   |
|-----------|----------|----------|-------|-------|---|
| Lats2     | 0,110076 | -0,02559 | 0,235 | 0,285 | 1 |
| Ubn2      | 0,110093 | 0,085331 | 0,754 | 0,743 | 1 |
| Ttc39c    | 0,110104 | -0,00206 | 0,132 | 0,173 | 1 |
| Eif4e     | 0,110114 | 0,0015   | 0,519 | 0,608 | 1 |
| Mcm7      | 0,110161 | -0,05588 | 0,217 | 0,255 | 1 |
| Tmem87b   | 0,110427 | -0,00605 | 0,457 | 0,542 | 1 |
| Scd1      | 0,110714 | 0,116935 | 0,739 | 0,732 | 1 |
| Taf1a     | 0,110827 | -0,01354 | 0,092 | 0,124 | 1 |
| Zfp524    | 0,110938 | -0,02398 | 0,207 | 0,253 | 1 |
| Zc3h7a    | 0,110991 | -0,0089  | 0,299 | 0,359 | 1 |
| Pde8a     | 0,111074 | -0,02651 | 0,91  | 0,89  | 1 |
| C2cd2l    | 0,111129 | -0,0186  | 0,182 | 0,228 | 1 |
| Cd68      | 0,11115  | 0,02528  | 0,057 | 0,036 | 1 |
| Spag1     | 0,111162 | -0,01222 | 0,046 | 0,07  | 1 |
| Pam       | 0,11127  | -0,00565 | 0,508 | 0,593 | 1 |
| Pdk1      | 0,111537 | -0,01592 | 0,046 | 0,07  | 1 |
| Atp6v0d1  | 0,111697 | -0,03422 | 0,861 | 0,888 | 1 |
| Slc7a11   | 0,112127 | -0,01705 | 0,017 | 0,032 | 1 |
| Trit1     | 0,112326 | -0,01984 | 0,053 | 0,078 | 1 |
| Lmnb1     | 0,112381 | 0,065007 | 0,143 | 0,112 | 1 |
| Impact    | 0,112423 | -0,03702 | 0,578 | 0,654 | 1 |
| Smpd3     | 0,112429 | 0,077812 | 0,114 | 0,086 | 1 |
| Id3       | 0,112451 | 0,064548 | 0,064 | 0,042 | 1 |
| Mnt       | 0,112527 | 0,080281 | 0,284 | 0,251 | 1 |
| Dnase1l1  | 0,112538 | -0,01335 | 0,028 | 0,046 | 1 |
| Iffo1     | 0,112607 | 0,114503 | 0,477 | 0,473 | 1 |
| Zfp882    | 0,112677 | -0,02826 | 0,112 | 0,146 | 1 |
| D830025C1 | 0,112696 | 0,043406 | 0,077 | 0,053 | 1 |
| Ahr       | 0,112755 | 0,031943 | 0,029 | 0,015 | 1 |
| A630072M  | 0,113017 | -0,0205  | 0,051 | 0,076 | 1 |
| Thrsp     | 0,11308  | -0,02696 | 0,136 | 0,175 | 1 |
| Ints1     | 0,113181 | 0,08384  | 0,429 | 0,411 | 1 |
| Ireb2     | 0,113312 | -0,00953 | 0,321 | 0,388 | 1 |
| 2310068J1 | 0,113495 | -0,02072 | 0,051 | 0,076 | 1 |
| Helb      | 0,113547 | 0,049797 | 0,119 | 0,091 | 1 |
| Hsp90ab1  | 0,113557 | 0,044438 | 1     | 0,998 | 1 |
| Vav2      | 0,113581 | -0,00957 | 0,028 | 0,046 | 1 |
| Elmsan1   | 0,113629 | -0,02407 | 0,22  | 0,268 | 1 |
| Akr1c13   | 0,113642 | -0,01667 | 0,029 | 0,049 | 1 |
| Gm16062   | 0,113698 | -0,01346 | 0,017 | 0,032 | 1 |
| Rplp2     | 0,113712 | -0,00038 | 0,993 | 0,992 | 1 |
| Mex3c     | 0,113773 | -0,00384 | 0,356 | 0,424 | 1 |
| Mblac1    | 0,113781 | -0,01297 | 0,017 | 0,032 | 1 |
| Dgkq      | 0,114023 | -0,01224 | 0,136 | 0,175 | 1 |
| Zswim4    | 0,114026 | 0,027319 | 0,051 | 0,032 | 1 |
| Cpsf6     | 0,114166 | 0,096917 | 0,613 | 0,618 | 1 |
| Aak1      | 0,11417  | 0,014769 | 0,325 | 0,397 | 1 |
| Slc39a9   | 0,114222 | -0,01091 | 0,281 | 0,34  | 1 |
| Rbm11     | 0,114489 | -0,01877 | 0,055 | 0,08  | 1 |
| Cavin3    | 0,11451  | -0,07448 | 0,833 | 0,81  | 1 |
| Rsb1l1    | 0,114558 | 0,002028 | 0,442 | 0,534 | 1 |
| Fbxw2     | 0,11466  | -0,01934 | 0,363 | 0,437 | 1 |



|          |          |          |       |       |   |
|----------|----------|----------|-------|-------|---|
| A430073D | 0,114667 | -0,01381 | 0,009 | 0,021 | 1 |
| Vps18    | 0,114678 | -0,02001 | 0,218 | 0,266 | 1 |
| Rbm45    | 0,114721 | -0,01801 | 0,119 | 0,156 | 1 |
| Gm32005  | 0,114737 | -0,03199 | 0,084 | 0,114 | 1 |
| Tmem55b  | 0,114764 | -0,01926 | 0,688 | 0,793 | 1 |
| Recq15   | 0,114784 | -0,01609 | 0,127 | 0,165 | 1 |
| Mkl1     | 0,114949 | -0,01465 | 0,05  | 0,074 | 1 |
| Cadps2   | 0,114961 | 0,05013  | 0,11  | 0,082 | 1 |
| 54304020 | 0,115254 | -0,01175 | 0,009 | 0,021 | 1 |
| AC151836 | 0,115254 | -0,01175 | 0,009 | 0,021 | 1 |
| Tmem186  | 0,115318 | -0,0097  | 0,112 | 0,148 | 1 |
| Sept2    | 0,115343 | -0,028   | 0,171 | 0,211 | 1 |
| Bicral   | 0,115594 | 0,098833 | 0,349 | 0,319 | 1 |
| Smc4     | 0,115678 | -0,02164 | 0,277 | 0,335 | 1 |
| Yipf6    | 0,115706 | -0,01121 | 0,356 | 0,43  | 1 |
| Fndc5    | 0,11585  | -0,01199 | 0,009 | 0,021 | 1 |
| Fam107a  | 0,11585  | -0,01199 | 0,009 | 0,021 | 1 |
| Man1a2   | 0,11585  | 0,001099 | 0,439 | 0,527 | 1 |
| Armcx4   | 0,116327 | 0,044114 | 0,04  | 0,023 | 1 |
| Ccr12    | 0,116442 | -0,00993 | 0,009 | 0,021 | 1 |
| Zfp174   | 0,116816 | -0,01383 | 0,031 | 0,051 | 1 |
| Ssfa2    | 0,116889 | 0,140857 | 0,503 | 0,517 | 1 |
| Bloc1s5  | 0,116893 | -0,00844 | 0,226 | 0,278 | 1 |
| Sf3b2    | 0,116912 | -0,02912 | 0,958 | 0,966 | 1 |
| Cenpb    | 0,116945 | 0,123613 | 0,521 | 0,536 | 1 |
| Jpx      | 0,116985 | -0,02669 | 0,136 | 0,173 | 1 |
| Gm45716  | 0,117281 | -0,00476 | 0,009 | 0,021 | 1 |
| Eif4a3   | 0,117477 | -0,02789 | 0,686 | 0,764 | 1 |
| Cmb1     | 0,117479 | -0,03884 | 0,163 | 0,2   | 1 |
| Ddx49    | 0,117522 | -0,02619 | 0,239 | 0,287 | 1 |
| Cct4     | 0,117525 | -0,04661 | 0,741 | 0,778 | 1 |
| Pim2     | 0,117639 | -0,00812 | 0,009 | 0,021 | 1 |
| Swt1     | 0,117769 | 0,017607 | 0,488 | 0,597 | 1 |
| Rad21    | 0,117956 | 0,074698 | 0,815 | 0,804 | 1 |
| Pigg     | 0,11817  | -0,02826 | 0,116 | 0,15  | 1 |
| Atp23    | 0,118208 | 0,017532 | 0,029 | 0,015 | 1 |
| Rbm12b1  | 0,11825  | -0,02912 | 0,106 | 0,139 | 1 |
| Ppp4r4   | 0,118297 | 0,024285 | 0,035 | 0,019 | 1 |
| Mcur1    | 0,118329 | -0,04608 | 0,174 | 0,211 | 1 |
| Sar1a    | 0,118375 | -0,01893 | 0,565 | 0,652 | 1 |
| Wdr46    | 0,118391 | -0,02913 | 0,196 | 0,241 | 1 |
| Shb      | 0,118545 | -0,02415 | 0,209 | 0,255 | 1 |
| Gm43672  | 0,118571 | -0,02554 | 0,035 | 0,055 | 1 |
| Rbms2    | 0,11877  | -0,01772 | 0,057 | 0,082 | 1 |
| Gm12207  | 0,118847 | 0,022313 | 0,02  | 0,008 | 1 |
| Ocel1    | 0,118918 | -0,00948 | 0,11  | 0,146 | 1 |
| Fjx1     | 0,118931 | 0,089442 | 0,083 | 0,059 | 1 |
| Slc25a40 | 0,118967 | -0,01175 | 0,105 | 0,139 | 1 |
| Osbp2    | 0,119073 | 0,072011 | 0,343 | 0,306 | 1 |
| Nat14    | 0,119079 | -0,03103 | 0,073 | 0,101 | 1 |
| Pcolce2  | 0,119173 | -0,07219 | 0,659 | 0,698 | 1 |
| Nectin2  | 0,119193 | 0,015459 | 0,029 | 0,015 | 1 |

|          |          |          |       |       |   |
|----------|----------|----------|-------|-------|---|
| Timp2    | 0,119281 | 0,052488 | 0,877 | 0,812 | 1 |
| Gm14168  | 0,11933  | 0,01696  | 0,02  | 0,008 | 1 |
| Plin4    | 0,119349 | 0,038103 | 0,136 | 0,103 | 1 |
| Fa2h     | 0,119386 | 0,041445 | 0,998 | 0,994 | 1 |
| Dffa     | 0,119587 | -0,01556 | 0,138 | 0,177 | 1 |
| Atg2a    | 0,119602 | 0,071893 | 0,24  | 0,207 | 1 |
| Zfp119a  | 0,119621 | -0,01359 | 0,031 | 0,051 | 1 |
| Gm15952  | 0,119792 | -0,01752 | 0,018 | 0,034 | 1 |
| Fam184a  | 0,11986  | -0,03333 | 0,106 | 0,139 | 1 |
| Sumf1    | 0,119903 | -0,02451 | 0,143 | 0,181 | 1 |
| Vamp3    | 0,119995 | -0,03791 | 0,763 | 0,814 | 1 |
| Klhl20   | 0,120051 | -0,01451 | 0,167 | 0,211 | 1 |
| Tmem79   | 0,120058 | -0,01502 | 0,018 | 0,034 | 1 |
| Polrmt   | 0,120204 | -0,0242  | 0,127 | 0,162 | 1 |
| Gm26766  | 0,1203   | 0,013376 | 0,02  | 0,008 | 1 |
| Arl1     | 0,120323 | -0,02901 | 0,717 | 0,774 | 1 |
| Cd27     | 0,120404 | 0,033514 | 0,044 | 0,068 | 1 |
| Elmo1    | 0,120699 | 0,070277 | 0,873 | 0,878 | 1 |
| Med14    | 0,120725 | 0,045742 | 0,174 | 0,139 | 1 |
| Xlr3b    | 0,12121  | -0,01845 | 0,018 | 0,034 | 1 |
| Rp9      | 0,121708 | -0,00277 | 0,525 | 0,597 | 1 |
| Nr3c2    | 0,12203  | -0,01571 | 0,099 | 0,131 | 1 |
| Cars     | 0,122077 | -0,02696 | 0,183 | 0,224 | 1 |
| Ctdnep1  | 0,12223  | -0,01234 | 0,363 | 0,435 | 1 |
| Rtf2     | 0,122364 | -0,02089 | 0,585 | 0,677 | 1 |
| Fnbp4    | 0,122483 | -0,01926 | 0,336 | 0,397 | 1 |
| Mgat4a   | 0,122531 | 0,018394 | 0,035 | 0,019 | 1 |
| Tchp     | 0,122806 | 0,002529 | 0,092 | 0,124 | 1 |
| Fem1a    | 0,122825 | -0,00739 | 0,259 | 0,312 | 1 |
| Ubr7     | 0,12289  | -0,02162 | 0,233 | 0,281 | 1 |
| Fbxo5    | 0,123099 | 0,044392 | 0,088 | 0,063 | 1 |
| Mvd      | 0,12317  | 0,125657 | 0,286 | 0,257 | 1 |
| Atp6v1c1 | 0,123265 | -0,01925 | 0,473 | 0,546 | 1 |
| Adamts2  | 0,123319 | -0,02091 | 0,218 | 0,266 | 1 |
| Fam135a  | 0,12361  | -0,01938 | 0,226 | 0,274 | 1 |
| Nsun7    | 0,12379  | 0,025328 | 0,064 | 0,042 | 1 |
| Ncstn    | 0,123898 | -0,02424 | 0,242 | 0,291 | 1 |
| Slc39a11 | 0,124132 | -0,02221 | 0,081 | 0,11  | 1 |
| Pcdh1    | 0,124301 | -0,02443 | 0,106 | 0,139 | 1 |
| 1700030K | 0,124318 | -0,0218  | 0,075 | 0,103 | 1 |
| Rps12    | 0,12445  | 0,096748 | 0,989 | 0,994 | 1 |
| Kpnb1    | 0,124453 | 0,082974 | 0,648 | 0,667 | 1 |
| Tepsin   | 0,124483 | -0,0126  | 0,062 | 0,089 | 1 |
| Nrbp1    | 0,124605 | -0,01089 | 0,325 | 0,386 | 1 |
| Igf2bp3  | 0,124737 | -0,00858 | 0,101 | 0,135 | 1 |
| Shroom1  | 0,124869 | -0,0285  | 0,27  | 0,321 | 1 |
| Bcl2l12  | 0,125066 | -0,01886 | 0,079 | 0,108 | 1 |
| Rbpms    | 0,125382 | -0,00452 | 0,018 | 0,034 | 1 |
| Mns1     | 0,125478 | -0,00097 | 0,018 | 0,034 | 1 |
| Tefm     | 0,125499 | -0,01407 | 0,059 | 0,084 | 1 |
| Epm2aip1 | 0,125541 | 0,017082 | 0,404 | 0,485 | 1 |
| Fam178b  | 0,125846 | -0,0164  | 0,084 | 0,114 | 1 |

|           |          |          |       |       |   |
|-----------|----------|----------|-------|-------|---|
| Prkd2     | 0,125876 | 0,032487 | 0,053 | 0,034 | 1 |
| Fam114a1  | 0,126052 | 0,022637 | 0,059 | 0,038 | 1 |
| Gga2      | 0,126186 | 0,049133 | 0,114 | 0,086 | 1 |
| Limk2     | 0,126434 | -0,04413 | 0,255 | 0,302 | 1 |
| Stx12     | 0,126515 | -0,03823 | 0,745 | 0,8   | 1 |
| Wdfy3     | 0,126704 | 0,089095 | 0,681 | 0,671 | 1 |
| Pgap3     | 0,126775 | -0,01254 | 0,035 | 0,055 | 1 |
| Rbm42     | 0,126779 | 0,073188 | 0,741 | 0,759 | 1 |
| Lrp12     | 0,126797 | -0,01918 | 0,172 | 0,215 | 1 |
| Dlg2      | 0,126864 | -0,00605 | 0,371 | 0,445 | 1 |
| Rpl21     | 0,126995 | -0,00848 | 0,998 | 0,996 | 1 |
| Stn1      | 0,127005 | -0,0114  | 0,167 | 0,211 | 1 |
| B3galt2   | 0,127072 | -0,01822 | 0,02  | 0,036 | 1 |
| Fam133b   | 0,127107 | -0,02826 | 0,615 | 0,648 | 1 |
| Parvb     | 0,127109 | 0,039527 | 0,174 | 0,139 | 1 |
| Ap5m1     | 0,127332 | 0,002133 | 0,217 | 0,27  | 1 |
| Uck2      | 0,127334 | -0,0222  | 0,119 | 0,154 | 1 |
| Ppp1r14b  | 0,127398 | -0,02003 | 0,136 | 0,173 | 1 |
| Plekho1   | 0,127427 | -0,01752 | 0,02  | 0,036 | 1 |
| Vars2     | 0,127457 | -0,01043 | 0,059 | 0,084 | 1 |
| Polr1a    | 0,12752  | -0,02161 | 0,196 | 0,241 | 1 |
| Arl14ep   | 0,127792 | -0,00758 | 0,257 | 0,312 | 1 |
| Gm15859   | 0,12781  | 0,042079 | 0,083 | 0,059 | 1 |
| Coq10b    | 0,127813 | 0,116193 | 0,253 | 0,23  | 1 |
| Ift46     | 0,127844 | -0,014   | 0,323 | 0,388 | 1 |
| Mical3    | 0,128206 | 0,095334 | 0,585 | 0,591 | 1 |
| Mef2c     | 0,1283   | -0,01845 | 0,02  | 0,036 | 1 |
| Dazap1    | 0,128344 | -0,00953 | 0,527 | 0,61  | 1 |
| Nfyb      | 0,128365 | 0,011357 | 0,323 | 0,39  | 1 |
| Tanc1     | 0,128373 | 0,080423 | 0,651 | 0,656 | 1 |
| Gpatch2l  | 0,128427 | -0,0049  | 0,261 | 0,316 | 1 |
| Gm527     | 0,128717 | -0,01606 | 0,037 | 0,057 | 1 |
| Slc10a7   | 0,12891  | -0,03563 | 0,209 | 0,251 | 1 |
| Dmtf1     | 0,128922 | -0,01134 | 0,367 | 0,439 | 1 |
| Cbx1      | 0,128985 | -0,00773 | 0,655 | 0,741 | 1 |
| Gm26810   | 0,129023 | -0,01405 | 0,011 | 0,023 | 1 |
| Vmac      | 0,129075 | -0,03301 | 0,141 | 0,175 | 1 |
| Agtrap    | 0,129079 | -0,01654 | 0,077 | 0,105 | 1 |
| Armc9     | 0,129187 | -0,01505 | 0,127 | 0,162 | 1 |
| Nf1       | 0,12924  | 0,073413 | 0,752 | 0,743 | 1 |
| Magi3     | 0,129316 | -0,0033  | 0,035 | 0,055 | 1 |
| Eya1      | 0,129573 | -0,00421 | 0     | 0,004 | 1 |
| Gm37233   | 0,129573 | -0,00421 | 0     | 0,004 | 1 |
| Sgpp2     | 0,129573 | -0,00421 | 0     | 0,004 | 1 |
| Otos      | 0,129573 | -0,00421 | 0     | 0,004 | 1 |
| Entpd2    | 0,129573 | -0,00421 | 0     | 0,004 | 1 |
| Egfl7     | 0,129573 | -0,00421 | 0     | 0,004 | 1 |
| Chst1     | 0,129573 | -0,00421 | 0     | 0,004 | 1 |
| A930018P  | 0,129573 | -0,00421 | 0     | 0,004 | 1 |
| Cst7      | 0,129573 | -0,00421 | 0     | 0,004 | 1 |
| 1700003F1 | 0,129573 | -0,00421 | 0     | 0,004 | 1 |
| Vstm2l    | 0,129573 | -0,00421 | 0     | 0,004 | 1 |

|           |          |          |   |       |   |
|-----------|----------|----------|---|-------|---|
| Gm14455   | 0,129573 | -0,00421 | 0 | 0,004 | 1 |
| Gm14401   | 0,129573 | -0,00421 | 0 | 0,004 | 1 |
| Glod5     | 0,129573 | -0,00421 | 0 | 0,004 | 1 |
| Gm15247   | 0,129573 | -0,00421 | 0 | 0,004 | 1 |
| Gm43241   | 0,129573 | -0,00421 | 0 | 0,004 | 1 |
| Bcl2l15   | 0,129573 | -0,00421 | 0 | 0,004 | 1 |
| Ddit4l    | 0,129573 | -0,00421 | 0 | 0,004 | 1 |
| Lrrc7     | 0,129573 | -0,00421 | 0 | 0,004 | 1 |
| Rad54b    | 0,129573 | -0,00421 | 0 | 0,004 | 1 |
| Phf24     | 0,129573 | -0,00421 | 0 | 0,004 | 1 |
| Plppr1    | 0,129573 | -0,00421 | 0 | 0,004 | 1 |
| Cfap57    | 0,129573 | -0,00421 | 0 | 0,004 | 1 |
| Zmynd12   | 0,129573 | -0,00421 | 0 | 0,004 | 1 |
| Hpca      | 0,129573 | -0,00421 | 0 | 0,004 | 1 |
| Ptafr     | 0,129573 | -0,00421 | 0 | 0,004 | 1 |
| Arhgef10l | 0,129573 | -0,00421 | 0 | 0,004 | 1 |
| Prdm16    | 0,129573 | -0,00421 | 0 | 0,004 | 1 |
| Lgi2      | 0,129573 | -0,00421 | 0 | 0,004 | 1 |
| Tlr1      | 0,129573 | -0,00421 | 0 | 0,004 | 1 |
| Shisa3    | 0,129573 | -0,00421 | 0 | 0,004 | 1 |
| Gabra4    | 0,129573 | -0,00421 | 0 | 0,004 | 1 |
| Lnx1      | 0,129573 | -0,00421 | 0 | 0,004 | 1 |
| Crybb3    | 0,129573 | -0,00421 | 0 | 0,004 | 1 |
| Elfn1     | 0,129573 | -0,00421 | 0 | 0,004 | 1 |
| 5730422E  | 0,129573 | -0,00421 | 0 | 0,004 | 1 |
| Nxph1     | 0,129573 | -0,00421 | 0 | 0,004 | 1 |
| Aass      | 0,129573 | -0,00421 | 0 | 0,004 | 1 |
| Lrrtm4    | 0,129573 | -0,00421 | 0 | 0,004 | 1 |
| Cfap100   | 0,129573 | -0,00421 | 0 | 0,004 | 1 |
| Gm15687   | 0,129573 | -0,00421 | 0 | 0,004 | 1 |
| Hif3a     | 0,129573 | -0,00421 | 0 | 0,004 | 1 |
| Slc7a10   | 0,129573 | -0,00421 | 0 | 0,004 | 1 |
| Kcnc1     | 0,129573 | -0,00421 | 0 | 0,004 | 1 |
| Il16      | 0,129573 | -0,00421 | 0 | 0,004 | 1 |
| Trim34a   | 0,129573 | -0,00421 | 0 | 0,004 | 1 |
| Trim12a   | 0,129573 | -0,00421 | 0 | 0,004 | 1 |
| Itgax     | 0,129573 | -0,00421 | 0 | 0,004 | 1 |
| Ebf3      | 0,129573 | -0,00421 | 0 | 0,004 | 1 |
| Gm48021   | 0,129573 | -0,00421 | 0 | 0,004 | 1 |
| Aire      | 0,129573 | -0,00421 | 0 | 0,004 | 1 |
| Kitl      | 0,129573 | -0,00421 | 0 | 0,004 | 1 |
| Lyz1      | 0,129573 | -0,00421 | 0 | 0,004 | 1 |
| Rdh16     | 0,129573 | -0,00421 | 0 | 0,004 | 1 |
| Efnb2     | 0,129573 | -0,00421 | 0 | 0,004 | 1 |
| Adprhl1   | 0,129573 | -0,00421 | 0 | 0,004 | 1 |
| Atp7b     | 0,129573 | -0,00421 | 0 | 0,004 | 1 |
| Dctd      | 0,129573 | -0,00421 | 0 | 0,004 | 1 |
| Gm45848   | 0,129573 | -0,00421 | 0 | 0,004 | 1 |
| Pbx4      | 0,129573 | -0,00421 | 0 | 0,004 | 1 |
| Gm26586   | 0,129573 | -0,00421 | 0 | 0,004 | 1 |
| Gm42031   | 0,129573 | -0,00421 | 0 | 0,004 | 1 |
| Kcng4     | 0,129573 | -0,00421 | 0 | 0,004 | 1 |

|            |          |          |   |       |   |
|------------|----------|----------|---|-------|---|
| Car5a      | 0,129573 | -0,00421 | 0 | 0,004 | 1 |
| Trim67     | 0,129573 | -0,00421 | 0 | 0,004 | 1 |
| Gm31718    | 0,129573 | -0,00421 | 0 | 0,004 | 1 |
| Mir124a-1l | 0,129573 | -0,00421 | 0 | 0,004 | 1 |
| Sox21      | 0,129573 | -0,00421 | 0 | 0,004 | 1 |
| Olfm2      | 0,129573 | -0,00421 | 0 | 0,004 | 1 |
| AB124611   | 0,129573 | -0,00421 | 0 | 0,004 | 1 |
| Epor       | 0,129573 | -0,00421 | 0 | 0,004 | 1 |
| Glb1l2     | 0,129573 | -0,00421 | 0 | 0,004 | 1 |
| Olf981     | 0,129573 | -0,00421 | 0 | 0,004 | 1 |
| C030014l2  | 0,129573 | -0,00421 | 0 | 0,004 | 1 |
| Bco2       | 0,129573 | -0,00421 | 0 | 0,004 | 1 |
| Cck        | 0,129573 | -0,00421 | 0 | 0,004 | 1 |
| Tgm4       | 0,129573 | -0,00421 | 0 | 0,004 | 1 |
| Gm11963    | 0,129573 | -0,00421 | 0 | 0,004 | 1 |
| Upp1       | 0,129573 | -0,00421 | 0 | 0,004 | 1 |
| Slc22a21   | 0,129573 | -0,00421 | 0 | 0,004 | 1 |
| Slc16a11   | 0,129573 | -0,00421 | 0 | 0,004 | 1 |
| Proca1     | 0,129573 | -0,00421 | 0 | 0,004 | 1 |
| Tmem132e   | 0,129573 | -0,00421 | 0 | 0,004 | 1 |
| Pctp       | 0,129573 | -0,00421 | 0 | 0,004 | 1 |
| Meox1      | 0,129573 | -0,00421 | 0 | 0,004 | 1 |
| Mpp3       | 0,129573 | -0,00421 | 0 | 0,004 | 1 |
| Gm11739    | 0,129573 | -0,00421 | 0 | 0,004 | 1 |
| Gm48708    | 0,129573 | -0,00421 | 0 | 0,004 | 1 |
| Nrn1       | 0,129573 | -0,00421 | 0 | 0,004 | 1 |
| Gm26877    | 0,129573 | -0,00421 | 0 | 0,004 | 1 |
| Dbn1       | 0,129573 | -0,00421 | 0 | 0,004 | 1 |
| Gm47467    | 0,129573 | -0,00421 | 0 | 0,004 | 1 |
| Cys1       | 0,129573 | -0,00421 | 0 | 0,004 | 1 |
| Zdhhc22    | 0,129573 | -0,00421 | 0 | 0,004 | 1 |
| Chga       | 0,129573 | -0,00421 | 0 | 0,004 | 1 |
| Fam181a    | 0,129573 | -0,00421 | 0 | 0,004 | 1 |
| Ighm       | 0,129573 | -0,00421 | 0 | 0,004 | 1 |
| Gm48079    | 0,129573 | -0,00421 | 0 | 0,004 | 1 |
| Scrt1      | 0,129573 | -0,00421 | 0 | 0,004 | 1 |
| Mpped1     | 0,129573 | -0,00421 | 0 | 0,004 | 1 |
| Bin2       | 0,129573 | -0,00421 | 0 | 0,004 | 1 |
| Shisa9     | 0,129573 | -0,00421 | 0 | 0,004 | 1 |
| Cd86       | 0,129573 | -0,00421 | 0 | 0,004 | 1 |
| Boc        | 0,129573 | -0,00421 | 0 | 0,004 | 1 |
| Olf204     | 0,129573 | -0,00421 | 0 | 0,004 | 1 |
| Igsf5      | 0,129573 | -0,00421 | 0 | 0,004 | 1 |
| Cpne5      | 0,129573 | -0,00421 | 0 | 0,004 | 1 |
| Adgre1     | 0,129573 | -0,00421 | 0 | 0,004 | 1 |
| Vit        | 0,129573 | -0,00421 | 0 | 0,004 | 1 |
| Arhgef33   | 0,129573 | -0,00421 | 0 | 0,004 | 1 |
| Gm6594     | 0,129573 | -0,00421 | 0 | 0,004 | 1 |
| Gm6277     | 0,129573 | -0,00421 | 0 | 0,004 | 1 |
| Nol4       | 0,129573 | -0,00421 | 0 | 0,004 | 1 |
| Pcdha9     | 0,129573 | -0,00421 | 0 | 0,004 | 1 |
| Kcnn2      | 0,129573 | -0,00421 | 0 | 0,004 | 1 |

|           |          |          |       |       |   |
|-----------|----------|----------|-------|-------|---|
| Camk2a    | 0,129573 | -0,00421 | 0     | 0,004 | 1 |
| Mro       | 0,129573 | -0,00421 | 0     | 0,004 | 1 |
| Gm6133    | 0,129573 | -0,00421 | 0     | 0,004 | 1 |
| Frmd8os   | 0,129573 | -0,00421 | 0     | 0,004 | 1 |
| Aldh1a7   | 0,129573 | -0,00421 | 0     | 0,004 | 1 |
| Pip5k1b   | 0,129573 | -0,00421 | 0     | 0,004 | 1 |
| Gm15491   | 0,129573 | -0,00421 | 0     | 0,004 | 1 |
| Adrb1     | 0,129573 | -0,00421 | 0     | 0,004 | 1 |
| Inpp4b    | 0,129573 | -0,0084  | 0     | 0,004 | 1 |
| Nyap2     | 0,129573 | -0,00631 | 0     | 0,004 | 1 |
| Hmcn1     | 0,129573 | -0,00631 | 0     | 0,004 | 1 |
| Gad1      | 0,129573 | -0,00631 | 0     | 0,004 | 1 |
| Fsbp      | 0,129573 | -0,00631 | 0     | 0,004 | 1 |
| Col15a1   | 0,129573 | -0,00631 | 0     | 0,004 | 1 |
| Gm11266   | 0,129573 | -0,00631 | 0     | 0,004 | 1 |
| Prom1     | 0,129573 | -0,00631 | 0     | 0,004 | 1 |
| Gm33370   | 0,129573 | -0,00631 | 0     | 0,004 | 1 |
| Gm43118   | 0,129573 | -0,00631 | 0     | 0,004 | 1 |
| Npy       | 0,129573 | -0,00631 | 0     | 0,004 | 1 |
| Sspnos    | 0,129573 | -0,00631 | 0     | 0,004 | 1 |
| Fam174b   | 0,129573 | -0,00631 | 0     | 0,004 | 1 |
| Ascl2     | 0,129573 | -0,00631 | 0     | 0,004 | 1 |
| Cideb     | 0,129573 | -0,00631 | 0     | 0,004 | 1 |
| Gm40513   | 0,129573 | -0,00631 | 0     | 0,004 | 1 |
| Bcl2a1b   | 0,129573 | -0,00631 | 0     | 0,004 | 1 |
| Hoxb4     | 0,129573 | -0,00631 | 0     | 0,004 | 1 |
| 3110006O  | 0,129573 | -0,00631 | 0     | 0,004 | 1 |
| Myt1l     | 0,129573 | -0,00631 | 0     | 0,004 | 1 |
| Prox2os   | 0,129573 | -0,00631 | 0     | 0,004 | 1 |
| Sncg      | 0,129573 | -0,0084  | 0     | 0,004 | 1 |
| Ptgr1     | 0,129573 | -0,01049 | 0     | 0,004 | 1 |
| Arhgap42  | 0,129573 | -0,01049 | 0     | 0,004 | 1 |
| 6030419C: | 0,129573 | -0,01258 | 0     | 0,004 | 1 |
| Emsy      | 0,129575 | 0,091799 | 0,56  | 0,561 | 1 |
| Snx22     | 0,129748 | -0,01719 | 0,075 | 0,103 | 1 |
| 4930426I2 | 0,129811 | -0,01419 | 0,062 | 0,089 | 1 |
| Prkaa1    | 0,129888 | -0,01728 | 0,239 | 0,289 | 1 |
| Prpsap2   | 0,129898 | -0,03259 | 0,349 | 0,399 | 1 |
| Ehhadh    | 0,130008 | -0,00532 | 0,059 | 0,084 | 1 |
| Il17ra    | 0,130193 | -0,01683 | 0,088 | 0,118 | 1 |
| Ldha      | 0,130221 | 0,074968 | 0,101 | 0,076 | 1 |
| Nsd2      | 0,130294 | 0,072526 | 0,501 | 0,498 | 1 |
| Ddx46     | 0,130361 | -0,02146 | 0,545 | 0,616 | 1 |
| Hey1      | 0,130365 | -0,01224 | 0,011 | 0,023 | 1 |
| Gm12279   | 0,130365 | -0,01224 | 0,011 | 0,023 | 1 |
| Stxbp1    | 0,130451 | 0,07032  | 0,272 | 0,241 | 1 |
| AC130815. | 0,130476 | 0,161626 | 0,229 | 0,2   | 1 |
| C1qb      | 0,130762 | -0,01191 | 0,02  | 0,036 | 1 |
| Slc39a7   | 0,130781 | 0,077229 | 0,65  | 0,652 | 1 |
| Bcan      | 0,130859 | -0,01886 | 0,011 | 0,023 | 1 |
| Ubxn7     | 0,130905 | 0,000303 | 0,343 | 0,411 | 1 |
| Pm20d1    | 0,130935 | 0,031499 | 0,017 | 0,006 | 1 |

|           |          |          |       |       |   |
|-----------|----------|----------|-------|-------|---|
| Chmp1a    | 0,130944 | -0,02053 | 0,523 | 0,61  | 1 |
| Sfr1      | 0,130964 | -0,0148  | 0,954 | 0,949 | 1 |
| Cflar     | 0,130969 | -0,01135 | 0,198 | 0,245 | 1 |
| Bicd2     | 0,131059 | 0,096446 | 0,714 | 0,715 | 1 |
| Gm28557   | 0,131097 | -0,00656 | 0,011 | 0,023 | 1 |
| Ifih1     | 0,131097 | -0,01018 | 0,011 | 0,023 | 1 |
| Thap8     | 0,131097 | -0,01018 | 0,011 | 0,023 | 1 |
| Tlcd1     | 0,131097 | -0,01018 | 0,011 | 0,023 | 1 |
| Gm48899   | 0,131097 | -0,01018 | 0,011 | 0,023 | 1 |
| Fen1      | 0,131098 | 0,020638 | 0,161 | 0,203 | 1 |
| Txndc5    | 0,131228 | -0,01386 | 0,086 | 0,116 | 1 |
| Gm43263   | 0,131236 | -0,01629 | 0,039 | 0,059 | 1 |
| Tk1       | 0,131372 | 0,017264 | 0,017 | 0,006 | 1 |
| Lym4      | 0,131395 | -0,02258 | 0,132 | 0,167 | 1 |
| Gm9803    | 0,131402 | -0,01827 | 0,04  | 0,061 | 1 |
| Umps      | 0,131447 | -0,01912 | 0,097 | 0,129 | 1 |
| Nol3      | 0,131842 | 0,061671 | 0,398 | 0,369 | 1 |
| St8sia5   | 0,131973 | 0,069488 | 0,316 | 0,276 | 1 |
| Foxj2     | 0,131987 | 0,079944 | 0,35  | 0,323 | 1 |
| Sdc1      | 0,132014 | 0,07704  | 0,048 | 0,03  | 1 |
| Stx16     | 0,132123 | 0,010323 | 0,574 | 0,671 | 1 |
| Sh3kbp1   | 0,132182 | -0,02454 | 0,725 | 0,772 | 1 |
| Zfp105    | 0,132227 | -0,0123  | 0,037 | 0,057 | 1 |
| Il10rb    | 0,132248 | 0,017264 | 0,017 | 0,006 | 1 |
| Ckap2     | 0,132248 | 0,01547  | 0,017 | 0,006 | 1 |
| Ddx18     | 0,132273 | 0,006537 | 0,442 | 0,54  | 1 |
| Halr1     | 0,132343 | -0,01075 | 0,002 | 0,008 | 1 |
| Calhm2    | 0,132343 | -0,01075 | 0,002 | 0,008 | 1 |
| Lmtk2     | 0,132419 | 0,047405 | 0,15  | 0,12  | 1 |
| Dock1     | 0,132449 | 0,099056 | 0,765 | 0,755 | 1 |
| Glyctk    | 0,132456 | -0,00837 | 0,011 | 0,023 | 1 |
| Ccnf      | 0,132456 | -0,00837 | 0,011 | 0,023 | 1 |
| Tmub1     | 0,132488 | -0,02019 | 0,239 | 0,287 | 1 |
| Tceal5    | 0,13257  | -0,00866 | 0,002 | 0,008 | 1 |
| Tnfaip3   | 0,13257  | -0,00866 | 0,002 | 0,008 | 1 |
| Nrsn1     | 0,13257  | -0,00866 | 0,002 | 0,008 | 1 |
| Radil     | 0,13257  | -0,01283 | 0,002 | 0,008 | 1 |
| Cavin1    | 0,13257  | -0,01283 | 0,002 | 0,008 | 1 |
| Mical1    | 0,13257  | -0,02111 | 0,002 | 0,008 | 1 |
| Ap1m1     | 0,132635 | -0,00508 | 0,25  | 0,3   | 1 |
| Kantr     | 0,132652 | -0,01754 | 0,11  | 0,143 | 1 |
| Pram1     | 0,132687 | 0,013673 | 0,017 | 0,006 | 1 |
| Klhl23    | 0,132687 | 0,011873 | 0,017 | 0,006 | 1 |
| Net1      | 0,132687 | 0,011873 | 0,017 | 0,006 | 1 |
| Gm20045   | 0,132777 | -0,00257 | 0,075 | 0,103 | 1 |
| 3110035E1 | 0,132796 | -0,00657 | 0,002 | 0,008 | 1 |
| Gm42417   | 0,132796 | -0,00657 | 0,002 | 0,008 | 1 |
| 5730559C: | 0,132796 | -0,00657 | 0,002 | 0,008 | 1 |
| Ccdc190   | 0,132796 | -0,00657 | 0,002 | 0,008 | 1 |
| Kcnj9     | 0,132796 | -0,00657 | 0,002 | 0,008 | 1 |
| Spag6     | 0,132796 | -0,00657 | 0,002 | 0,008 | 1 |
| Mamdc4    | 0,132796 | -0,00657 | 0,002 | 0,008 | 1 |

|           |          |          |       |       |   |
|-----------|----------|----------|-------|-------|---|
| BC016548  | 0,132796 | -0,00657 | 0,002 | 0,008 | 1 |
| Rtl8c     | 0,132796 | -0,00657 | 0,002 | 0,008 | 1 |
| Fgf2      | 0,132796 | -0,00657 | 0,002 | 0,008 | 1 |
| Gm3764    | 0,132796 | -0,00657 | 0,002 | 0,008 | 1 |
| Pou3f2    | 0,132796 | -0,00657 | 0,002 | 0,008 | 1 |
| Al427809  | 0,132796 | -0,00657 | 0,002 | 0,008 | 1 |
| Dmrta2    | 0,132796 | -0,00657 | 0,002 | 0,008 | 1 |
| Abcb4     | 0,132796 | -0,00657 | 0,002 | 0,008 | 1 |
| Gm9970    | 0,132796 | -0,00657 | 0,002 | 0,008 | 1 |
| Gm43660   | 0,132796 | -0,00657 | 0,002 | 0,008 | 1 |
| Anxa3     | 0,132796 | -0,00657 | 0,002 | 0,008 | 1 |
| Nos1      | 0,132796 | -0,00657 | 0,002 | 0,008 | 1 |
| Gm15627   | 0,132796 | -0,00657 | 0,002 | 0,008 | 1 |
| Ache      | 0,132796 | -0,00657 | 0,002 | 0,008 | 1 |
| Fam71f2   | 0,132796 | -0,00657 | 0,002 | 0,008 | 1 |
| Tril      | 0,132796 | -0,00657 | 0,002 | 0,008 | 1 |
| Ccdc142   | 0,132796 | -0,00657 | 0,002 | 0,008 | 1 |
| Gm45441   | 0,132796 | -0,00657 | 0,002 | 0,008 | 1 |
| Grm5      | 0,132796 | -0,00657 | 0,002 | 0,008 | 1 |
| Gm32687   | 0,132796 | -0,00657 | 0,002 | 0,008 | 1 |
| Lrp1      | 0,132796 | -0,00657 | 0,002 | 0,008 | 1 |
| Gm15350   | 0,132796 | -0,00657 | 0,002 | 0,008 | 1 |
| Gm49083   | 0,132796 | -0,00657 | 0,002 | 0,008 | 1 |
| Gm21750   | 0,132796 | -0,00657 | 0,002 | 0,008 | 1 |
| Ednrb     | 0,132796 | -0,00657 | 0,002 | 0,008 | 1 |
| 1810041H: | 0,132796 | -0,00657 | 0,002 | 0,008 | 1 |
| Rasl10a   | 0,132796 | -0,00657 | 0,002 | 0,008 | 1 |
| BC049762  | 0,132796 | -0,00657 | 0,002 | 0,008 | 1 |
| Hoxb7     | 0,132796 | -0,00657 | 0,002 | 0,008 | 1 |
| Hoxb2     | 0,132796 | -0,00657 | 0,002 | 0,008 | 1 |
| Gsdma     | 0,132796 | -0,00657 | 0,002 | 0,008 | 1 |
| Vmn1r218  | 0,132796 | -0,00657 | 0,002 | 0,008 | 1 |
| Gm29675   | 0,132796 | -0,00657 | 0,002 | 0,008 | 1 |
| Sfrp5     | 0,132796 | -0,00657 | 0,002 | 0,008 | 1 |
| Kcnip2    | 0,132796 | -0,00657 | 0,002 | 0,008 | 1 |
| Pcdh19    | 0,132838 | 0,025865 | 0,017 | 0,006 | 1 |
| Ctu1      | 0,132885 | -0,01001 | 0,04  | 0,061 | 1 |
| Slc35a4   | 0,133048 | -0,01898 | 0,411 | 0,483 | 1 |
| Pold1     | 0,133183 | -0,01322 | 0,103 | 0,135 | 1 |
| Tmlhe     | 0,133314 | -0,00855 | 0,035 | 0,055 | 1 |
| D17H6S53  | 0,133405 | -0,03723 | 0,134 | 0,167 | 1 |
| Pcdhb13   | 0,133575 | 0,011579 | 0,017 | 0,006 | 1 |
| Zc3h7b    | 0,133652 | -0,01871 | 0,374 | 0,441 | 1 |
| Rrp12     | 0,13368  | -0,01376 | 0,088 | 0,118 | 1 |
| Smim6     | 0,133709 | 0,000729 | 0,002 | 0,008 | 1 |
| Lcn11     | 0,133709 | -0,00109 | 0,002 | 0,008 | 1 |
| Slitrk2   | 0,133709 | -0,00291 | 0,002 | 0,008 | 1 |
| S100a3    | 0,133709 | -0,00291 | 0,002 | 0,008 | 1 |
| Igsf21    | 0,133709 | -0,00291 | 0,002 | 0,008 | 1 |
| Tmem150b  | 0,133709 | -0,00291 | 0,002 | 0,008 | 1 |
| 1700102H: | 0,133709 | -0,00291 | 0,002 | 0,008 | 1 |
| Igfbp5    | 0,133709 | -0,00474 | 0,002 | 0,008 | 1 |



|          |          |          |       |       |   |
|----------|----------|----------|-------|-------|---|
| C130013H | 0,133709 | -0,00474 | 0,002 | 0,008 | 1 |
| Gm9754   | 0,133709 | -0,00474 | 0,002 | 0,008 | 1 |
| Sftpc    | 0,133709 | -0,00474 | 0,002 | 0,008 | 1 |
| Slitrk1  | 0,133709 | -0,00474 | 0,002 | 0,008 | 1 |
| Spag5    | 0,133709 | -0,00474 | 0,002 | 0,008 | 1 |
| Dgkg     | 0,133709 | -0,00474 | 0,002 | 0,008 | 1 |
| Gm15829  | 0,133709 | -0,00474 | 0,002 | 0,008 | 1 |
| Fam171a2 | 0,133709 | -0,00318 | 0,002 | 0,008 | 1 |
| Ilkap    | 0,133792 | -0,00632 | 0,543 | 0,648 | 1 |
| 1700066B | 0,133825 | -0,00656 | 0,011 | 0,023 | 1 |
| Ppp2r2b  | 0,133825 | -0,00656 | 0,011 | 0,023 | 1 |
| Lix1l    | 0,134442 | 0,040822 | 0,112 | 0,084 | 1 |
| Nuf2     | 0,134463 | -0,01125 | 0,006 | 0,015 | 1 |
| Plcxd2   | 0,134614 | 0,016056 | 0,026 | 0,013 | 1 |
| Fxr1     | 0,134668 | -0,03494 | 0,883 | 0,899 | 1 |
| Mcmdc2   | 0,134912 | 0,009489 | 0,017 | 0,006 | 1 |
| Atpaf2   | 0,134924 | -0,01618 | 0,088 | 0,118 | 1 |
| Gm14308  | 0,13495  | -0,00917 | 0,006 | 0,015 | 1 |
| Med9os   | 0,13495  | -0,00917 | 0,006 | 0,015 | 1 |
| Gm26964  | 0,13495  | -0,00917 | 0,006 | 0,015 | 1 |
| Pik3r5   | 0,13495  | -0,00917 | 0,006 | 0,015 | 1 |
| C2       | 0,13495  | -0,00917 | 0,006 | 0,015 | 1 |
| Arsk     | 0,135057 | 0,00244  | 0,207 | 0,257 | 1 |
| Mfsd5    | 0,135082 | -0,02064 | 0,279 | 0,331 | 1 |
| Bhlhe41  | 0,135125 | 0,083565 | 0,857 | 0,819 | 1 |
| Bend3    | 0,135204 | -0,00476 | 0,011 | 0,023 | 1 |
| Nfat5    | 0,13534  | 0,10223  | 0,673 | 0,654 | 1 |
| Spaca6   | 0,13536  | -0,0069  | 0,154 | 0,194 | 1 |
| Paqr6    | 0,135417 | 0,1424   | 0,439 | 0,416 | 1 |
| Prss53   | 0,135422 | -0,01394 | 0,022 | 0,038 | 1 |
| Kank1    | 0,135443 | -0,01974 | 0,006 | 0,015 | 1 |
| Fdxr     | 0,135486 | 0,002495 | 0,334 | 0,401 | 1 |
| Noct     | 0,135496 | -0,01103 | 0,039 | 0,059 | 1 |
| Dlg5     | 0,135529 | -0,00835 | 0,18  | 0,226 | 1 |
| Tmco6    | 0,135586 | -0,02394 | 0,141 | 0,177 | 1 |
| Adcy9    | 0,135593 | -0,02826 | 0,116 | 0,148 | 1 |
| Amdhd2   | 0,135606 | 0,105854 | 0,398 | 0,388 | 1 |
| Clrn1    | 0,135606 | -0,00942 | 0,006 | 0,015 | 1 |
| AC161165 | 0,135606 | -0,00942 | 0,006 | 0,015 | 1 |
| Aph1c    | 0,135626 | -0,02202 | 0,024 | 0,04  | 1 |
| Xndc1    | 0,135766 | -0,01914 | 0,163 | 0,203 | 1 |
| Fbxo32   | 0,135808 | 0,077862 | 0,734 | 0,728 | 1 |
| Zfp953   | 0,135825 | -0,01698 | 0,04  | 0,061 | 1 |
| Gmfb     | 0,135923 | 0,078283 | 0,717 | 0,724 | 1 |
| Osbpl9   | 0,136069 | -0,01612 | 0,161 | 0,203 | 1 |
| G630016G | 0,136097 | -0,00735 | 0,006 | 0,015 | 1 |
| Msi1     | 0,136097 | -0,00735 | 0,006 | 0,015 | 1 |
| Gm16049  | 0,136097 | -0,00735 | 0,006 | 0,015 | 1 |
| Phlpp1   | 0,13614  | 0,05712  | 0,983 | 0,996 | 1 |
| Fzd3     | 0,136152 | -0,0216  | 0,136 | 0,171 | 1 |
| Epg5     | 0,136271 | -0,02388 | 0,16  | 0,196 | 1 |
| Kat2a    | 0,136281 | -0,02466 | 0,156 | 0,194 | 1 |

|            |          |          |       |       |   |
|------------|----------|----------|-------|-------|---|
| Cecr2      | 0,136317 | -0,01274 | 0,064 | 0,091 | 1 |
| Gm2000     | 0,136512 | -0,00842 | 0,084 | 0,114 | 1 |
| Pou3f1     | 0,136549 | 0,180729 | 0,75  | 0,734 | 1 |
| Meis1      | 0,136553 | -0,0013  | 0,334 | 0,397 | 1 |
| Tube1      | 0,136566 | -0,01191 | 0,022 | 0,038 | 1 |
| Rabgap1l   | 0,136715 | 0,066739 | 0,55  | 0,538 | 1 |
| Serinc5    | 0,136869 | 0,075279 | 0,796 | 0,719 | 1 |
| Phf10      | 0,136914 | -0,02955 | 0,398 | 0,456 | 1 |
| Zfp619     | 0,136954 | -0,01349 | 0,04  | 0,061 | 1 |
| Avpi1      | 0,13701  | -0,00953 | 0,037 | 0,057 | 1 |
| Trpv3      | 0,137148 | 0,02932  | 0,068 | 0,046 | 1 |
| Tmem67     | 0,137157 | -0,01152 | 0,079 | 0,108 | 1 |
| Phf2os1    | 0,137252 | -0,00371 | 0,006 | 0,015 | 1 |
| Bcl2l11    | 0,137319 | 0,086282 | 0,224 | 0,194 | 1 |
| Slc23a2    | 0,137794 | -0,02835 | 0,187 | 0,226 | 1 |
| Top3a      | 0,137858 | -0,01151 | 0,042 | 0,063 | 1 |
| Dok7       | 0,137918 | 0,057198 | 0,149 | 0,12  | 1 |
| Cep72      | 0,137937 | -0,00975 | 0,095 | 0,127 | 1 |
| Epb41l4ao  | 0,137945 | -0,00877 | 0,233 | 0,283 | 1 |
| Rpl5       | 0,138039 | 0,08278  | 0,993 | 0,987 | 1 |
| Cdkn2aipnl | 0,138224 | -0,00143 | 0,226 | 0,276 | 1 |
| Rbm12b2    | 0,138239 | -0,00833 | 0,116 | 0,15  | 1 |
| Lrrc56     | 0,138391 | -0,01198 | 0,042 | 0,063 | 1 |
| Mapk1ip1l  | 0,138464 | -0,0031  | 0,27  | 0,323 | 1 |
| Cul4a      | 0,138637 | -0,01574 | 0,328 | 0,388 | 1 |
| Smyd3      | 0,138757 | 0,000183 | 0,132 | 0,171 | 1 |
| Plk2       | 0,138816 | 0,04802  | 0,07  | 0,049 | 1 |
| Gpr75      | 0,138909 | -0,01349 | 0,04  | 0,061 | 1 |
| Ccnj       | 0,138925 | -0,01766 | 0,048 | 0,07  | 1 |
| Csnk2a1    | 0,138995 | -0,02403 | 0,954 | 0,954 | 1 |
| Nrxn1      | 0,139076 | -0,00324 | 0,066 | 0,093 | 1 |
| Jade2      | 0,139197 | 0,06752  | 0,226 | 0,192 | 1 |
| Papd4      | 0,139222 | -0,00416 | 0,275 | 0,333 | 1 |
| Gm17690    | 0,139258 | -0,01596 | 0,024 | 0,04  | 1 |
| Mdm1       | 0,139281 | -0,0218  | 0,051 | 0,074 | 1 |
| Uevld      | 0,139352 | -0,00438 | 0,077 | 0,105 | 1 |
| Rtp4       | 0,13957  | 0,002334 | 0,039 | 0,059 | 1 |
| Prkcb      | 0,139637 | 0,101986 | 0,389 | 0,371 | 1 |
| Ppp1r14c   | 0,139703 | -0,01523 | 0,044 | 0,065 | 1 |
| Mrs2       | 0,139714 | -0,02401 | 0,251 | 0,302 | 1 |
| Tmtc4      | 0,139758 | -0,03156 | 0,064 | 0,089 | 1 |
| Rad54l2    | 0,139762 | -0,01822 | 0,215 | 0,259 | 1 |
| Ankle2     | 0,139928 | -0,0152  | 0,288 | 0,34  | 1 |
| Gm5141     | 0,140089 | -0,01151 | 0,042 | 0,063 | 1 |
| Zfand6     | 0,140174 | -0,02772 | 0,628 | 0,69  | 1 |
| Cnot10     | 0,140336 | -0,00209 | 0,347 | 0,416 | 1 |
| Dner       | 0,140366 | 0,034775 | 0,075 | 0,053 | 1 |
| Ppp1r16a   | 0,140421 | 0,002614 | 0,273 | 0,333 | 1 |
| Ssrp1      | 0,140473 | -0,0065  | 0,444 | 0,532 | 1 |
| Hoxa2      | 0,140598 | 0,037731 | 0,077 | 0,055 | 1 |
| Tbc1d32    | 0,140625 | -0,02733 | 0,117 | 0,15  | 1 |
| Stk3       | 0,140742 | -0,00647 | 0,171 | 0,215 | 1 |

|           |          |          |       |       |   |
|-----------|----------|----------|-------|-------|---|
| Rrad      | 0,140785 | 0,028283 | 0,013 | 0,004 | 1 |
| Stk17b    | 0,140916 | 0,030072 | 0,083 | 0,059 | 1 |
| Lpin2     | 0,140918 | -0,02308 | 0,048 | 0,07  | 1 |
| Fxyd4     | 0,140961 | 0,013979 | 0,031 | 0,017 | 1 |
| Clip1     | 0,14097  | -0,02239 | 0,123 | 0,156 | 1 |
| Smad9     | 0,141082 | 0,015459 | 0,031 | 0,017 | 1 |
| Nuak2     | 0,14114  | 0,015772 | 0,013 | 0,004 | 1 |
| Gmfg      | 0,141264 | 0,012465 | 0,009 | 0,002 | 1 |
| Ccne1     | 0,141264 | 0,012465 | 0,009 | 0,002 | 1 |
| Rnd1      | 0,141264 | 0,012465 | 0,009 | 0,002 | 1 |
| Nhs       | 0,141264 | 0,016075 | 0,009 | 0,002 | 1 |
| Cox15     | 0,141412 | -0,01047 | 0,139 | 0,175 | 1 |
| Brinp2    | 0,141481 | 0,010655 | 0,009 | 0,002 | 1 |
| Oacyl     | 0,141481 | 0,010655 | 0,009 | 0,002 | 1 |
| Lrrn2     | 0,141481 | 0,012465 | 0,009 | 0,002 | 1 |
| Lck       | 0,141481 | 0,012465 | 0,009 | 0,002 | 1 |
| Pgbd1     | 0,141496 | 0,013972 | 0,013 | 0,004 | 1 |
| Gm30074   | 0,141496 | 0,017569 | 0,013 | 0,004 | 1 |
| Hist2h2bb | 0,141496 | 0,015772 | 0,013 | 0,004 | 1 |
| Gm49201   | 0,141542 | -0,01429 | 0,013 | 0,025 | 1 |
| Arid4b    | 0,141553 | 0,070517 | 0,905 | 0,884 | 1 |
| Det1      | 0,141587 | -0,01418 | 0,044 | 0,065 | 1 |
| Gm12092   | 0,141605 | -0,02158 | 0,057 | 0,08  | 1 |
| Wsb2      | 0,141635 | -0,02246 | 0,604 | 0,688 | 1 |
| Gm26615   | 0,141699 | 0,008842 | 0,009 | 0,002 | 1 |
| Zfp82     | 0,141699 | 0,008842 | 0,009 | 0,002 | 1 |
| Cdca2     | 0,141699 | 0,008842 | 0,009 | 0,002 | 1 |
| B430319H  | 0,141699 | 0,008842 | 0,009 | 0,002 | 1 |
| Dio2      | 0,141699 | 0,008842 | 0,009 | 0,002 | 1 |
| Gm11027   | 0,141852 | 0,019363 | 0,013 | 0,004 | 1 |
| Scn3b     | 0,141852 | 0,015772 | 0,013 | 0,004 | 1 |
| Cish      | 0,141852 | 0,013972 | 0,013 | 0,004 | 1 |
| Ngf       | 0,141916 | 0,007025 | 0,009 | 0,002 | 1 |
| Mov10     | 0,141916 | 0,007025 | 0,009 | 0,002 | 1 |
| 4930599N  | 0,141916 | 0,007025 | 0,009 | 0,002 | 1 |
| Gm26765   | 0,141916 | 0,007025 | 0,009 | 0,002 | 1 |
| Smad6     | 0,141916 | 0,007025 | 0,009 | 0,002 | 1 |
| Gm35818   | 0,141916 | 0,007025 | 0,009 | 0,002 | 1 |
| Grhl2     | 0,141916 | 0,007025 | 0,009 | 0,002 | 1 |
| AC098883  | 0,141916 | 0,007025 | 0,009 | 0,002 | 1 |
| Gm26749   | 0,141916 | 0,007025 | 0,009 | 0,002 | 1 |
| Slc15a3   | 0,141916 | 0,007025 | 0,009 | 0,002 | 1 |
| Nlrc4     | 0,142165 | -0,01454 | 0,013 | 0,025 | 1 |
| Gm15265   | 0,142208 | 0,015772 | 0,013 | 0,004 | 1 |
| Il23a     | 0,142208 | 0,010362 | 0,013 | 0,004 | 1 |
| Gm10644   | 0,142208 | 0,010362 | 0,013 | 0,004 | 1 |
| 9430037G  | 0,142208 | 0,010362 | 0,013 | 0,004 | 1 |
| 2810408A  | 0,142208 | 0,010362 | 0,013 | 0,004 | 1 |
| Serpina9  | 0,142208 | 0,010362 | 0,013 | 0,004 | 1 |
| Rap2b     | 0,142312 | 0,003638 | 0,15  | 0,192 | 1 |
| Setd1a    | 0,142401 | -0,03032 | 0,136 | 0,169 | 1 |
| Myl6      | 0,142436 | -0,02563 | 0,993 | 0,987 | 1 |

|         |          |          |       |       |   |
|---------|----------|----------|-------|-------|---|
| Cdk2ap1 | 0,142447 | -0,02307 | 0,624 | 0,694 | 1 |
| Pxylp1  | 0,142556 | -0,00988 | 0,119 | 0,154 | 1 |
| Gm26624 | 0,142565 | 0,008552 | 0,013 | 0,004 | 1 |
| Gm36757 | 0,142684 | -0,01943 | 0,053 | 0,076 | 1 |
| Oasl2   | 0,142748 | 0,013673 | 0,013 | 0,004 | 1 |
| Trip13  | 0,142749 | 0,01517  | 0,013 | 0,004 | 1 |
| Mtch2   | 0,14277  | -0,02854 | 0,67  | 0,741 | 1 |
| Vmn1r81 | 0,142794 | 0,006738 | 0,009 | 0,002 | 1 |
| Eif2s3x | 0,142811 | 0,078629 | 0,528 | 0,519 | 1 |
| Ppp1r9b | 0,142837 | -0,02315 | 0,417 | 0,477 | 1 |
| Cmpk2   | 0,142927 | 0,011873 | 0,013 | 0,004 | 1 |
| Larp7   | 0,142969 | 0,033412 | 0,229 | 0,291 | 1 |
| Cyhr1   | 0,142997 | -0,01957 | 0,85  | 0,907 | 1 |
| Gm26617 | 0,143013 | 0,004922 | 0,009 | 0,002 | 1 |
| Ptges3  | 0,143049 | -0,02881 | 0,985 | 0,985 | 1 |
| Pdgfra  | 0,143155 | -0,01093 | 0,013 | 0,025 | 1 |
| Atad2b  | 0,143163 | 0,098528 | 0,459 | 0,443 | 1 |
| Hexim2  | 0,143244 | -0,01175 | 0,046 | 0,068 | 1 |
| Cdk4    | 0,143253 | -0,02166 | 0,457 | 0,538 | 1 |
| Gm10160 | 0,143286 | 0,01007  | 0,013 | 0,004 | 1 |
| Ccdc186 | 0,143502 | 0,01406  | 0,431 | 0,523 | 1 |
| Tmem231 | 0,143675 | -0,01086 | 0,024 | 0,04  | 1 |
| Zbtb37  | 0,143769 | 0,020386 | 0,272 | 0,331 | 1 |
| Zfp503  | 0,143803 | 0,039533 | 0,106 | 0,08  | 1 |
| Agtbbp1 | 0,143824 | -0,0252  | 0,49  | 0,557 | 1 |
| Gm9972  | 0,1439   | -0,00682 | 0,013 | 0,025 | 1 |
| Cacng7  | 0,14391  | -0,01354 | 0,297 | 0,352 | 1 |
| Brap    | 0,14393  | -0,01778 | 0,343 | 0,403 | 1 |
| Psd2    | 0,143962 | -0,01067 | 0,174 | 0,217 | 1 |
| Hlf     | 0,144062 | -0,00554 | 0,024 | 0,04  | 1 |
| Zfp142  | 0,144145 | 0,066848 | 0,198 | 0,169 | 1 |
| Ulk4    | 0,144163 | -0,0112  | 0,046 | 0,068 | 1 |
| Srsf12  | 0,144229 | -0,0162  | 0,026 | 0,042 | 1 |
| Tnpo1   | 0,144267 | -0,00826 | 0,394 | 0,464 | 1 |
| Ralgps2 | 0,144293 | 0,054809 | 0,07  | 0,049 | 1 |
| Hs6st1  | 0,144346 | -0,01652 | 0,283 | 0,34  | 1 |
| Cntn4   | 0,144365 | -0,02308 | 0,048 | 0,07  | 1 |
| Atrx    | 0,144508 | 0,074537 | 0,903 | 0,899 | 1 |
| Pla2g3  | 0,144531 | -0,01068 | 0,013 | 0,025 | 1 |
| Gm10501 | 0,144531 | -0,01068 | 0,013 | 0,025 | 1 |
| Ddx24   | 0,14457  | -0,03899 | 0,78  | 0,81  | 1 |
| Rabgef1 | 0,144586 | -0,01215 | 0,182 | 0,226 | 1 |
| Faf1    | 0,14469  | -0,01293 | 0,29  | 0,344 | 1 |
| Noxo1   | 0,144738 | -0,01061 | 0,024 | 0,04  | 1 |
| Ccdc117 | 0,144768 | -0,01337 | 0,213 | 0,257 | 1 |
| Apbb2   | 0,144905 | -0,05391 | 0,888 | 0,89  | 1 |
| Mapk9   | 0,144917 | -0,02111 | 0,251 | 0,297 | 1 |
| Ptbp1   | 0,144977 | 0,081922 | 0,272 | 0,247 | 1 |
| Gpatch4 | 0,144992 | -0,02644 | 0,141 | 0,177 | 1 |
| Crlf2   | 0,144996 | -0,01287 | 0,026 | 0,042 | 1 |
| Mmgt1   | 0,145161 | 0,009187 | 0,398 | 0,487 | 1 |
| Slc6a8  | 0,145213 | 0,089996 | 0,648 | 0,639 | 1 |

|           |          |          |       |       |   |
|-----------|----------|----------|-------|-------|---|
| Tnfrsf12a | 0,145291 | 0,219902 | 0,127 | 0,101 | 1 |
| Lrch1     | 0,145308 | 0,044034 | 0,108 | 0,082 | 1 |
| Ints7     | 0,14533  | -0,03281 | 0,387 | 0,447 | 1 |
| Gm13031   | 0,145415 | -0,00733 | 0,013 | 0,025 | 1 |
| Zfp810    | 0,145415 | -0,00913 | 0,013 | 0,025 | 1 |
| Kyat3     | 0,145547 | -0,02413 | 0,139 | 0,175 | 1 |
| Mettl8    | 0,145552 | 0,001317 | 0,15  | 0,19  | 1 |
| Tmem57    | 0,14557  | 0,001897 | 0,473 | 0,549 | 1 |
| Rpl23a    | 0,145651 | -0,00859 | 0,956 | 0,962 | 1 |
| Ubfd1     | 0,145749 | -0,01452 | 0,134 | 0,169 | 1 |
| Lrch2     | 0,146115 | -0,02777 | 0,204 | 0,245 | 1 |
| Rbm41     | 0,146184 | -0,02243 | 0,073 | 0,099 | 1 |
| Nol9      | 0,146353 | 0,005909 | 0,086 | 0,116 | 1 |
| Cyth1     | 0,146405 | -0,03611 | 0,859 | 0,867 | 1 |
| Usp46     | 0,146497 | 0,06365  | 0,305 | 0,272 | 1 |
| Atxn7     | 0,146574 | -0,01302 | 0,222 | 0,266 | 1 |
| Dhcr7     | 0,146616 | -0,00519 | 0,554 | 0,643 | 1 |
| Dock5     | 0,146693 | -0,02074 | 0,525 | 0,605 | 1 |
| Prob1     | 0,14696  | 0,068172 | 0,198 | 0,169 | 1 |
| Jcad      | 0,146963 | 0,022647 | 0,081 | 0,057 | 1 |
| Pias1     | 0,147149 | -0,00316 | 0,281 | 0,344 | 1 |
| Sh3yl1    | 0,147207 | -0,0166  | 0,053 | 0,076 | 1 |
| Apaf1     | 0,147498 | 0,042743 | 0,094 | 0,07  | 1 |
| Saal1     | 0,147719 | -0,00651 | 0,101 | 0,133 | 1 |
| Cables2   | 0,147802 | 0,042743 | 0,086 | 0,063 | 1 |
| Erp27     | 0,147856 | -0,01287 | 0,026 | 0,042 | 1 |
| 2810021J2 | 0,147903 | -0,01965 | 0,059 | 0,082 | 1 |
| Sec24a    | 0,147908 | -0,00207 | 0,251 | 0,304 | 1 |
| Arl13b    | 0,14811  | 0,031271 | 0,415 | 0,513 | 1 |
| Glud1     | 0,148129 | 0,076564 | 0,679 | 0,69  | 1 |
| Elmod3    | 0,14814  | -0,01524 | 0,163 | 0,203 | 1 |
| Frmd5     | 0,148315 | -0,02144 | 0,683 | 0,77  | 1 |
| Plgrkt    | 0,148328 | -0,01199 | 0,264 | 0,316 | 1 |
| Snx33     | 0,148527 | 0,096239 | 0,428 | 0,411 | 1 |
| Brat1     | 0,148621 | -0,01632 | 0,174 | 0,215 | 1 |
| Mgrn1     | 0,148716 | -0,01476 | 0,464 | 0,544 | 1 |
| Kdm7a     | 0,148824 | 0,005032 | 0,255 | 0,304 | 1 |
| Znrf3     | 0,14891  | -0,01704 | 0,167 | 0,205 | 1 |
| Ssx2ip    | 0,148943 | -0,01668 | 0,059 | 0,082 | 1 |
| Dock3     | 0,148986 | -0,00779 | 0,31  | 0,367 | 1 |
| Ssh3      | 0,14928  | -0,00835 | 0,193 | 0,236 | 1 |
| Rlim      | 0,14934  | 0,138126 | 0,505 | 0,494 | 1 |
| Spin1     | 0,149352 | -0,0218  | 0,217 | 0,259 | 1 |
| Htra3     | 0,149357 | -0,01652 | 0,172 | 0,211 | 1 |
| Dyrk1b    | 0,149359 | -0,01796 | 0,116 | 0,148 | 1 |
| Zfp219    | 0,149424 | 0,031548 | 0,092 | 0,068 | 1 |
| Lemd3     | 0,149477 | -0,0147  | 0,22  | 0,266 | 1 |
| Acot1     | 0,149489 | 0,00891  | 0,545 | 0,61  | 1 |
| Rbm48     | 0,149495 | -0,01061 | 0,235 | 0,283 | 1 |
| Ankrd9    | 0,149706 | -0,01727 | 0,059 | 0,082 | 1 |
| D930048G  | 0,14971  | 0,032693 | 0,07  | 0,049 | 1 |
| Bst2      | 0,149726 | 0,079508 | 0,051 | 0,034 | 1 |

|           |          |          |       |       |   |
|-----------|----------|----------|-------|-------|---|
| Plxna3    | 0,149929 | 0,027629 | 0,07  | 0,049 | 1 |
| Zfp692    | 0,150014 | 0,065216 | 0,211 | 0,181 | 1 |
| Kif16b    | 0,15004  | 0,062145 | 0,25  | 0,217 | 1 |
| Zkscan4   | 0,150085 | -0,01263 | 0,028 | 0,044 | 1 |
| Map10     | 0,150145 | -0,01882 | 0,068 | 0,093 | 1 |
| Adam10    | 0,150161 | -0,04587 | 0,771 | 0,823 | 1 |
| Fam76b    | 0,15026  | 5,44E-05 | 0,279 | 0,333 | 1 |
| Fbxo4     | 0,150378 | -0,00695 | 0,125 | 0,16  | 1 |
| Rbl2      | 0,15041  | -0,00517 | 0,472 | 0,546 | 1 |
| Pkia      | 0,150578 | -0,02341 | 0,101 | 0,131 | 1 |
| Senp2     | 0,150593 | 0,08635  | 0,481 | 0,479 | 1 |
| Ilvbl     | 0,150825 | -0,05299 | 0,664 | 0,7   | 1 |
| Exd2      | 0,151034 | -0,01882 | 0,323 | 0,382 | 1 |
| Ahcy12    | 0,151048 | 0,092924 | 0,483 | 0,481 | 1 |
| Ppp1r12a  | 0,151065 | 0,073965 | 0,76  | 0,804 | 1 |
| Safb      | 0,151101 | 0,098543 | 0,739 | 0,759 | 1 |
| Cdc42se1  | 0,151174 | 0,096569 | 0,561 | 0,565 | 1 |
| Jph4      | 0,151195 | -0,00988 | 0,67  | 0,709 | 1 |
| Nacc2     | 0,151269 | -0,01227 | 0,846 | 0,873 | 1 |
| Dtnb      | 0,15132  | -0,01475 | 0,09  | 0,118 | 1 |
| Phf21a    | 0,151468 | 0,003609 | 0,361 | 0,426 | 1 |
| Fxyd1     | 0,151723 | -0,26893 | 0,194 | 0,222 | 1 |
| Tmed10    | 0,15184  | -0,02015 | 1     | 0,998 | 1 |
| Ap3s1     | 0,151952 | -0,01763 | 0,086 | 0,114 | 1 |
| Tm9sf2    | 0,152065 | 0,061762 | 0,71  | 0,717 | 1 |
| Nrm       | 0,152186 | 0,018442 | 0,022 | 0,011 | 1 |
| Pcdhb22   | 0,152221 | -0,02826 | 0,079 | 0,105 | 1 |
| Gtf2i     | 0,152347 | 0,07991  | 0,769 | 0,797 | 1 |
| Pdss1     | 0,152359 | -0,01315 | 0,053 | 0,076 | 1 |
| Casp8ap2  | 0,15236  | 0,022186 | 0,31  | 0,378 | 1 |
| Dscaml1   | 0,152416 | 0,09023  | 0,622 | 0,654 | 1 |
| Rnf220    | 0,152566 | 0,083082 | 0,776 | 0,785 | 1 |
| Syn3      | 0,152673 | -0,01287 | 0,028 | 0,044 | 1 |
| Hsf5      | 0,152909 | -0,01533 | 0,055 | 0,078 | 1 |
| Afg1l     | 0,152959 | -0,01143 | 0,055 | 0,078 | 1 |
| Pus7l     | 0,152994 | -0,00187 | 0,048 | 0,07  | 1 |
| Abcc1     | 0,153037 | -0,00731 | 0,18  | 0,222 | 1 |
| Rpn2      | 0,153044 | -0,02287 | 0,734 | 0,8   | 1 |
| Cdkn2d    | 0,153427 | -0,01503 | 0,563 | 0,633 | 1 |
| Phf6      | 0,153436 | 0,003412 | 0,2   | 0,249 | 1 |
| 9030624JC | 0,153522 | 0,006306 | 0,506 | 0,601 | 1 |
| Nmnat3    | 0,153599 | -0,01601 | 0,062 | 0,086 | 1 |
| Zfp740    | 0,153601 | -0,00307 | 0,55  | 0,646 | 1 |
| Rexo1     | 0,15378  | -0,01665 | 0,33  | 0,384 | 1 |
| Atp8b2    | 0,153813 | 0,022736 | 0,044 | 0,027 | 1 |
| Dgkh      | 0,153921 | 0,030321 | 0,039 | 0,023 | 1 |
| Hdac1     | 0,154051 | -0,0088  | 0,38  | 0,445 | 1 |
| Duxbl3    | 0,154073 | -0,01273 | 0,015 | 0,027 | 1 |
| B4galt4   | 0,154108 | -0,00908 | 0,028 | 0,044 | 1 |
| Ints9     | 0,154124 | 0,063469 | 0,211 | 0,181 | 1 |
| Bend6     | 0,154199 | -0,01093 | 0,015 | 0,027 | 1 |
| Mllt1     | 0,154254 | -0,01642 | 0,128 | 0,162 | 1 |

|           |          |          |       |       |   |
|-----------|----------|----------|-------|-------|---|
| Sf3b3     | 0,154312 | 0,0164   | 0,453 | 0,53  | 1 |
| Pomt2     | 0,154497 | -0,04168 | 0,229 | 0,27  | 1 |
| Pdlim3    | 0,154707 | -0,01297 | 0,015 | 0,027 | 1 |
| Tmtc3     | 0,154727 | -0,01629 | 0,138 | 0,173 | 1 |
| Sdcbp     | 0,154778 | -0,00747 | 0,428 | 0,498 | 1 |
| Aldh3a2   | 0,15497  | -0,0291  | 0,391 | 0,456 | 1 |
| Ccdc17    | 0,155075 | -0,01068 | 0,015 | 0,027 | 1 |
| Raver1    | 0,155075 | -0,01068 | 0,015 | 0,027 | 1 |
| Nbeal2    | 0,155075 | -0,01068 | 0,015 | 0,027 | 1 |
| Tfip11    | 0,155166 | -0,00945 | 0,239 | 0,285 | 1 |
| Ube2s     | 0,15517  | -0,02189 | 0,741 | 0,808 | 1 |
| Brip1os   | 0,155217 | 0,063216 | 0,185 | 0,156 | 1 |
| Mink1     | 0,155439 | 0,093095 | 0,686 | 0,694 | 1 |
| Naa35     | 0,155518 | 0,003163 | 0,352 | 0,428 | 1 |
| Ubqln4    | 0,155581 | -0,00025 | 0,198 | 0,243 | 1 |
| Gm16316   | 0,155712 | -0,01093 | 0,015 | 0,027 | 1 |
| Bbof1     | 0,155919 | -0,01419 | 0,073 | 0,099 | 1 |
| 4632404H  | 0,156227 | -0,01588 | 0,072 | 0,097 | 1 |
| Gm14322   | 0,156234 | -0,01287 | 0,029 | 0,046 | 1 |
| Zfp677    | 0,156308 | -0,01969 | 0,068 | 0,093 | 1 |
| Pcdhgb1   | 0,15635  | -0,01117 | 0,015 | 0,027 | 1 |
| Hps1      | 0,156414 | -0,01319 | 0,077 | 0,103 | 1 |
| Rnf111    | 0,156423 | -0,01731 | 0,314 | 0,371 | 1 |
| Wdr37     | 0,156765 | -0,0185  | 0,323 | 0,376 | 1 |
| Scube3    | 0,156948 | 0,030085 | 0,108 | 0,082 | 1 |
| Med18     | 0,156991 | 0,03644  | 0,079 | 0,057 | 1 |
| Rusc2     | 0,158196 | 0,095415 | 0,554 | 0,574 | 1 |
| Zfp574    | 0,158205 | -0,0155  | 0,11  | 0,141 | 1 |
| Gdpd5     | 0,158341 | 0,077349 | 0,398 | 0,376 | 1 |
| Odf2l     | 0,158375 | -0,00605 | 0,183 | 0,226 | 1 |
| Senp1     | 0,158379 | -0,0037  | 0,235 | 0,281 | 1 |
| Peli1     | 0,158514 | 0,025093 | 0,497 | 0,61  | 1 |
| Mreg      | 0,158549 | 0,021602 | 0,039 | 0,023 | 1 |
| Zranb1    | 0,158602 | 0,089671 | 0,585 | 0,591 | 1 |
| Pgpep1    | 0,158605 | 0,033147 | 0,149 | 0,118 | 1 |
| Map2k3    | 0,158888 | 0,059242 | 0,156 | 0,129 | 1 |
| 4930426LC | 0,158896 | -0,0115  | 0,007 | 0,017 | 1 |
| Gnb1l     | 0,158896 | -0,0115  | 0,007 | 0,017 | 1 |
| lqch      | 0,158896 | -0,01356 | 0,007 | 0,017 | 1 |
| Gas2l3    | 0,158896 | -0,02384 | 0,007 | 0,017 | 1 |
| Spin4     | 0,158934 | -0,01536 | 0,031 | 0,049 | 1 |
| Cant1     | 0,158948 | -0,00106 | 0,317 | 0,378 | 1 |
| Wtap      | 0,159083 | -0,00822 | 0,369 | 0,432 | 1 |
| Mknk2     | 0,159092 | 0,054797 | 0,154 | 0,127 | 1 |
| Usp4      | 0,159106 | -0,01936 | 0,363 | 0,418 | 1 |
| Pde11a    | 0,159117 | 0,014286 | 0,062 | 0,042 | 1 |
| Gnl3l     | 0,159124 | -0,01698 | 0,497 | 0,589 | 1 |
| Ctsa      | 0,159159 | 0,051124 | 0,903 | 0,888 | 1 |
| Cmip      | 0,159188 | 0,113104 | 0,606 | 0,614 | 1 |
| Xpo6      | 0,15922  | 0,102545 | 0,352 | 0,34  | 1 |
| Tmem254a  | 0,159375 | -0,01713 | 0,033 | 0,051 | 1 |
| Elmo2     | 0,159553 | -0,02589 | 0,187 | 0,224 | 1 |

|           |          |          |       |       |   |
|-----------|----------|----------|-------|-------|---|
| Pcdhb18   | 0,159738 | -0,02343 | 0,084 | 0,112 | 1 |
| Ino80e    | 0,159849 | -0,01381 | 0,294 | 0,346 | 1 |
| Baz2b     | 0,159869 | -0,04215 | 0,793 | 0,819 | 1 |
| Col20a1   | 0,159915 | -0,00812 | 0,007 | 0,017 | 1 |
| Phb       | 0,160053 | 0,000741 | 0,552 | 0,658 | 1 |
| Dvl3      | 0,160186 | 0,003618 | 0,316 | 0,373 | 1 |
| Clec2l    | 0,160253 | -0,00968 | 0,007 | 0,017 | 1 |
| Gm15510   | 0,160253 | -0,00968 | 0,007 | 0,017 | 1 |
| 2610507B: | 0,160474 | -0,03905 | 0,615 | 0,673 | 1 |
| Hspa13    | 0,160872 | -0,01115 | 0,365 | 0,424 | 1 |
| Camkmt    | 0,160873 | -0,01351 | 0,07  | 0,095 | 1 |
| 6430573P: | 0,160932 | -0,0076  | 0,007 | 0,017 | 1 |
| Pik3c2a   | 0,161001 | -0,01604 | 0,512 | 0,582 | 1 |
| Fbxo10    | 0,16108  | 0,024014 | 0,094 | 0,07  | 1 |
| Meis3     | 0,161171 | 0,020764 | 0,033 | 0,019 | 1 |
| Pkd2      | 0,161212 | -0,00347 | 0,328 | 0,388 | 1 |
| Gm20342   | 0,161216 | 0,026089 | 0,231 | 0,285 | 1 |
| Dbnl      | 0,161598 | -0,01272 | 0,488 | 0,557 | 1 |
| Kcnb1     | 0,161619 | -0,00786 | 0,007 | 0,017 | 1 |
| Zfp608    | 0,161716 | 0,000125 | 0,35  | 0,409 | 1 |
| Sart3     | 0,161844 | -0,01577 | 0,209 | 0,249 | 1 |
| Grk2      | 0,162292 | -0,00035 | 0,272 | 0,329 | 1 |
| Zfp433    | 0,162303 | -0,00036 | 0,007 | 0,017 | 1 |
| Gm5784    | 0,162303 | -0,00036 | 0,007 | 0,017 | 1 |
| Zfand4    | 0,162342 | -0,01936 | 0,037 | 0,055 | 1 |
| Npepl1    | 0,16243  | -0,01009 | 0,25  | 0,297 | 1 |
| Ndn       | 0,162439 | -0,02955 | 0,222 | 0,262 | 1 |
| Usp16     | 0,162491 | 0,008926 | 0,396 | 0,473 | 1 |
| Ccdc43    | 0,16256  | -0,01255 | 0,182 | 0,222 | 1 |
| Nkx2-2    | 0,162848 | 0,010911 | 0,475 | 0,568 | 1 |
| Gin1      | 0,1629   | -0,0022  | 0,149 | 0,184 | 1 |
| Map3k5    | 0,162954 | 0,032473 | 0,108 | 0,082 | 1 |
| Cd34      | 0,163011 | 0,036255 | 0,182 | 0,15  | 1 |
| Senp7     | 0,163011 | 0,026079 | 0,431 | 0,527 | 1 |
| Foxj3     | 0,163019 | 0,085179 | 0,277 | 0,251 | 1 |
| Pcdhgc4   | 0,163095 | 0,034695 | 0,073 | 0,053 | 1 |
| Pik3ca    | 0,163207 | 0,090945 | 0,433 | 0,426 | 1 |
| Hspa9     | 0,163217 | 0,07561  | 0,802 | 0,814 | 1 |
| Plvap     | 0,163385 | -0,00765 | 0,103 | 0,076 | 1 |
| 1810013L2 | 0,163416 | 0,000183 | 0,27  | 0,321 | 1 |
| Abhd17b   | 0,163444 | -0,03442 | 0,822 | 0,842 | 1 |
| Cyfp1     | 0,163486 | 0,086934 | 0,541 | 0,534 | 1 |
| Myo1c     | 0,163603 | 0,028413 | 0,051 | 0,034 | 1 |
| Elmod2    | 0,163624 | -0,02044 | 0,251 | 0,295 | 1 |
| Tmem169   | 0,163761 | -0,00821 | 0,068 | 0,093 | 1 |
| Invs      | 0,163793 | -0,02274 | 0,171 | 0,207 | 1 |
| Scpep1    | 0,163903 | 0,07884  | 0,257 | 0,23  | 1 |
| E2f6      | 0,16417  | -0,01665 | 0,16  | 0,196 | 1 |
| Smim3     | 0,164219 | -0,03038 | 0,059 | 0,08  | 1 |
| Fbxo27    | 0,1648   | -0,0033  | 0,033 | 0,051 | 1 |
| A230072E1 | 0,164832 | -0,01093 | 0,017 | 0,03  | 1 |
| Cmtr1     | 0,165067 | 0,033605 | 0,103 | 0,078 | 1 |



|           |          |          |       |       |   |
|-----------|----------|----------|-------|-------|---|
| Akap11    | 0,165208 | 0,057323 | 0,787 | 0,816 | 1 |
| Prdm9     | 0,165218 | -0,01525 | 0,017 | 0,03  | 1 |
| Rtn2      | 0,165242 | -0,01805 | 0,037 | 0,055 | 1 |
| Slf2      | 0,165295 | 0,105311 | 0,433 | 0,424 | 1 |
| Lrrc47    | 0,165323 | -0,01909 | 0,262 | 0,31  | 1 |
| Ift81     | 0,165364 | -0,00763 | 0,123 | 0,156 | 1 |
| Zmym4     | 0,166346 | 0,016238 | 0,387 | 0,46  | 1 |
| Wispl     | 0,166576 | -0,00429 | 0,031 | 0,049 | 1 |
| Rmnd5a    | 0,16698  | 0,085017 | 0,499 | 0,487 | 1 |
| Nav3      | 0,167092 | -0,01431 | 0,125 | 0,158 | 1 |
| Psmc5     | 0,167277 | -0,01648 | 0,229 | 0,272 | 1 |
| Syng1     | 0,167448 | -0,00922 | 0,117 | 0,15  | 1 |
| Ii11ra1   | 0,167587 | -0,03163 | 0,15  | 0,184 | 1 |
| Ltbr      | 0,167697 | 0,052428 | 0,161 | 0,133 | 1 |
| Atp11b    | 0,16778  | 0,101763 | 0,483 | 0,494 | 1 |
| Scyl1     | 0,167816 | -0,01784 | 0,292 | 0,344 | 1 |
| Snx16     | 0,167853 | -0,00566 | 0,253 | 0,3   | 1 |
| Fyn       | 0,167986 | 0,101248 | 0,536 | 0,553 | 1 |
| Zbtb5     | 0,167987 | -0,01081 | 0,119 | 0,152 | 1 |
| Rundc3b   | 0,168107 | 0,027633 | 0,046 | 0,03  | 1 |
| Dse       | 0,16853  | -0,0207  | 0,04  | 0,059 | 1 |
| Endov     | 0,1686   | -0,022   | 0,11  | 0,139 | 1 |
| Btaf1     | 0,1687   | -0,01326 | 0,255 | 0,3   | 1 |
| Mad2l1    | 0,168724 | -0,02506 | 0,051 | 0,072 | 1 |
| Cnot6     | 0,168839 | 0,129754 | 0,4   | 0,414 | 1 |
| Rbsn      | 0,169432 | -0,00134 | 0,327 | 0,384 | 1 |
| Gpr137c   | 0,169517 | 0,027364 | 0,292 | 0,357 | 1 |
| Cse1l     | 0,169617 | -0,01975 | 0,25  | 0,295 | 1 |
| Zw10      | 0,169818 | -0,01812 | 0,15  | 0,186 | 1 |
| Pspc1     | 0,169824 | 0,006764 | 0,316 | 0,376 | 1 |
| Eya2      | 0,170012 | -0,03025 | 0,066 | 0,089 | 1 |
| Gdpgp1    | 0,170022 | -0,02289 | 0,048 | 0,068 | 1 |
| Ctnnd2    | 0,170116 | -0,0207  | 0,04  | 0,059 | 1 |
| Btg3      | 0,170133 | 0,036968 | 0,053 | 0,036 | 1 |
| Chst8     | 0,170708 | 0,07324  | 0,332 | 0,302 | 1 |
| Mettl15   | 0,170994 | -0,01053 | 0,128 | 0,162 | 1 |
| Lrrtm2    | 0,170999 | 0,143129 | 0,262 | 0,238 | 1 |
| Zdhhc17   | 0,171531 | -0,01287 | 0,694 | 0,774 | 1 |
| Shmt2     | 0,171609 | -0,01258 | 0,158 | 0,194 | 1 |
| 0610010FC | 0,171774 | -0,01637 | 0,226 | 0,268 | 1 |
| Zfp784    | 0,172041 | -0,00705 | 0,037 | 0,055 | 1 |
| Cog5      | 0,172064 | -0,0066  | 0,295 | 0,352 | 1 |
| Gm17518   | 0,172107 | -0,01322 | 0,018 | 0,032 | 1 |
| Ncoa1     | 0,172137 | 0,09103  | 0,38  | 0,361 | 1 |
| Pcsk2os1  | 0,17249  | -0,01752 | 0,018 | 0,032 | 1 |
| Atp6v1h   | 0,17271  | -0,00881 | 0,549 | 0,627 | 1 |
| Uba1      | 0,172811 | 0,074227 | 0,749 | 0,762 | 1 |
| Cyb5r1    | 0,172862 | 0,097532 | 0,233 | 0,211 | 1 |
| Gm11032   | 0,172969 | 0,01696  | 0,018 | 0,008 | 1 |
| Map3k14   | 0,172969 | 0,01696  | 0,018 | 0,008 | 1 |
| Cks2      | 0,172969 | 0,01696  | 0,018 | 0,008 | 1 |
| Zfyve28   | 0,172969 | 0,018748 | 0,018 | 0,008 | 1 |

|            |          |          |       |       |   |
|------------|----------|----------|-------|-------|---|
| Pmvk       | 0,173055 | 0,013936 | 0,47  | 0,568 | 1 |
| Trim25     | 0,173162 | 0,049599 | 0,134 | 0,108 | 1 |
| Klhl24     | 0,173197 | 0,084831 | 0,706 | 0,7   | 1 |
| Gm11508    | 0,173243 | -0,00809 | 0,018 | 0,032 | 1 |
| Zc3h13     | 0,173281 | 8,83E-05 | 0,472 | 0,553 | 1 |
| Dpp7       | 0,173407 | 0,084247 | 0,239 | 0,215 | 1 |
| Osbpl6     | 0,173469 | 0,028393 | 0,066 | 0,046 | 1 |
| Gm43254    | 0,173636 | 0,01517  | 0,018 | 0,008 | 1 |
| St6galnac3 | 0,17365  | -0,02029 | 0,714 | 0,804 | 1 |
| 1110008L1  | 0,173716 | -0,00855 | 0,037 | 0,055 | 1 |
| Tox3       | 0,173753 | -0,01191 | 0,018 | 0,032 | 1 |
| Wdfy2      | 0,173767 | 0,086122 | 0,378 | 0,361 | 1 |
| Papd7      | 0,173912 | -0,00282 | 0,169 | 0,207 | 1 |
| Ska2       | 0,174002 | -0,02375 | 0,138 | 0,169 | 1 |
| Il12rb1    | 0,174098 | 0,02449  | 0,103 | 0,078 | 1 |
| Tmem150a   | 0,174189 | -0,01258 | 0,273 | 0,323 | 1 |
| 4933411E   | 0,174305 | 0,01696  | 0,018 | 0,008 | 1 |
| Fez2       | 0,174313 | -0,02131 | 0,538 | 0,612 | 1 |
| Nr2f1      | 0,174477 | 0,016658 | 0,018 | 0,008 | 1 |
| Slamf1     | 0,174486 | 0,045825 | 0,04  | 0,025 | 1 |
| Cdk5rap1   | 0,174504 | -0,02569 | 0,051 | 0,072 | 1 |
| Chuk       | 0,174515 | -0,01072 | 0,483 | 0,549 | 1 |
| Ythdc2     | 0,174518 | 0,006357 | 0,295 | 0,35  | 1 |
| Tpm1       | 0,1748   | -0,01683 | 0,615 | 0,662 | 1 |
| Slc25a47   | 0,174887 | -0,00987 | 0,018 | 0,032 | 1 |
| Tnnt2      | 0,174974 | 0,011579 | 0,018 | 0,008 | 1 |
| Tm4sf1     | 0,174974 | 0,011579 | 0,018 | 0,008 | 1 |
| Chst3      | 0,174999 | -0,0176  | 0,116 | 0,146 | 1 |
| Ganab      | 0,174999 | 0,109165 | 0,47  | 0,468 | 1 |
| 3100002H   | 0,175149 | 0,016658 | 0,018 | 0,008 | 1 |
| Tbc1d13    | 0,175161 | -0,01283 | 0,172 | 0,209 | 1 |
| Phf1       | 0,175419 | -0,01326 | 0,202 | 0,241 | 1 |
| Cdc16      | 0,175602 | -0,00148 | 0,305 | 0,357 | 1 |
| Gla        | 0,175819 | -0,00852 | 0,123 | 0,156 | 1 |
| Rorb       | 0,175822 | 0,01308  | 0,018 | 0,008 | 1 |
| Siah1b     | 0,175827 | -0,01254 | 0,04  | 0,059 | 1 |
| Btbd16     | 0,175994 | 0,041749 | 0,068 | 0,049 | 1 |
| Cebpz      | 0,176041 | 0,007358 | 0,534 | 0,62  | 1 |
| Ptov1      | 0,176121 | -0,0325  | 0,833 | 0,869 | 1 |
| Rb1cc1     | 0,176159 | 0,077918 | 0,765 | 0,741 | 1 |
| Wdhd1      | 0,176179 | 0,053503 | 0,055 | 0,038 | 1 |
| B9d2       | 0,176183 | -0,0218  | 0,066 | 0,089 | 1 |
| Gm5535     | 0,176486 | -0,02266 | 0,057 | 0,078 | 1 |
| Ppp4r1     | 0,176605 | 0,054172 | 0,22  | 0,19  | 1 |
| Topors     | 0,176656 | 0,120379 | 0,382 | 0,367 | 1 |
| Shc4       | 0,176784 | -0,01465 | 0,044 | 0,063 | 1 |
| Nudt10     | 0,176838 | -0,01962 | 0,046 | 0,065 | 1 |
| Socs6      | 0,177055 | 0,10467  | 0,299 | 0,274 | 1 |
| Opa3       | 0,177085 | 0,001237 | 0,303 | 0,357 | 1 |
| Rfx1       | 0,177282 | 0,037877 | 0,099 | 0,076 | 1 |
| Htt        | 0,177354 | 0,088971 | 0,372 | 0,354 | 1 |
| Maneal     | 0,177525 | -0,02025 | 0,141 | 0,175 | 1 |

|           |          |          |       |       |   |
|-----------|----------|----------|-------|-------|---|
| Utp4      | 0,177558 | -0,01442 | 0,125 | 0,156 | 1 |
| Rab21     | 0,17778  | 0,060355 | 0,921 | 0,916 | 1 |
| Dnmt1     | 0,178037 | 0,020128 | 0,242 | 0,3   | 1 |
| Prmt1     | 0,178056 | -0,00031 | 0,657 | 0,749 | 1 |
| Zfp729b   | 0,178146 | 0,001639 | 0,145 | 0,181 | 1 |
| AW554918  | 0,178892 | -0,01802 | 0,171 | 0,207 | 1 |
| Lmtk3     | 0,179025 | -0,0058  | 0,039 | 0,057 | 1 |
| Gucy1a1   | 0,179048 | -0,01175 | 0,009 | 0,019 | 1 |
| Gm20457   | 0,179048 | -0,01175 | 0,009 | 0,019 | 1 |
| Lppos     | 0,179048 | -0,01175 | 0,009 | 0,019 | 1 |
| B2302170  | 0,179048 | -0,01175 | 0,009 | 0,019 | 1 |
| Gm45844   | 0,179061 | -0,00754 | 0,04  | 0,059 | 1 |
| Thbs2     | 0,179182 | 0,033514 | 0,075 | 0,055 | 1 |
| Trabd     | 0,179198 | -0,01272 | 0,277 | 0,329 | 1 |
| Etfdh     | 0,179247 | -0,01041 | 0,239 | 0,287 | 1 |
| Krba1     | 0,179429 | -0,01216 | 0,152 | 0,188 | 1 |
| Il6st     | 0,179509 | 0,115116 | 0,532 | 0,551 | 1 |
| Filip1    | 0,179567 | -0,02429 | 0,009 | 0,019 | 1 |
| Fhl3      | 0,179903 | -0,00968 | 0,009 | 0,019 | 1 |
| Spint2    | 0,179903 | -0,00968 | 0,009 | 0,019 | 1 |
| Usp45     | 0,180031 | -0,00238 | 0,149 | 0,184 | 1 |
| Ppp1ca    | 0,180113 | -0,03928 | 0,872 | 0,882 | 1 |
| Ercc6     | 0,18034  | -0,01669 | 0,105 | 0,133 | 1 |
| Snapc4    | 0,180353 | -0,02052 | 0,072 | 0,095 | 1 |
| Eid2      | 0,180433 | -0,02052 | 0,066 | 0,089 | 1 |
| Tmem140   | 0,180503 | 0,044807 | 0,035 | 0,021 | 1 |
| Col4a3bp  | 0,180815 | 0,08192  | 0,411 | 0,399 | 1 |
| Hyou1     | 0,180873 | -0,01238 | 0,229 | 0,27  | 1 |
| Arhgef10  | 0,181093 | -0,03131 | 0,954 | 0,96  | 1 |
| Cav1      | 0,181138 | -0,01712 | 0,108 | 0,137 | 1 |
| 5033421B  | 0,181167 | 0,031322 | 0,061 | 0,042 | 1 |
| Ccser1    | 0,181193 | -0,0137  | 0,02  | 0,034 | 1 |
| Olfr655   | 0,18129  | -0,01158 | 0,009 | 0,019 | 1 |
| AC163040  | 0,181457 | -0,00605 | 0,009 | 0,019 | 1 |
| Ccnyl1    | 0,181468 | -0,01869 | 0,194 | 0,232 | 1 |
| St3gal3   | 0,181543 | 0,08418  | 0,325 | 0,304 | 1 |
| Zfp189    | 0,181777 | -0,01418 | 0,051 | 0,072 | 1 |
| Pcdhb16   | 0,181793 | -0,02447 | 0,083 | 0,108 | 1 |
| Cd59b     | 0,181932 | -0,01882 | 0,059 | 0,08  | 1 |
| 1700008JC | 0,181969 | -0,01855 | 0,051 | 0,072 | 1 |
| Mgea5     | 0,182151 | -0,00909 | 0,646 | 0,719 | 1 |
| AC161165  | 0,182154 | -0,00812 | 0,009 | 0,019 | 1 |
| Clasp1    | 0,182219 | 0,057571 | 0,204 | 0,175 | 1 |
| Ptcd1     | 0,182247 | 0,001595 | 0,13  | 0,165 | 1 |
| Usp49     | 0,182315 | 0,032062 | 0,075 | 0,055 | 1 |
| Hk2       | 0,182331 | -0,00656 | 0,02  | 0,034 | 1 |
| Repin1    | 0,182454 | -0,01528 | 0,106 | 0,135 | 1 |
| Tmem132c  | 0,182577 | -0,01397 | 0,066 | 0,089 | 1 |
| Ighmbp2   | 0,182613 | -0,01372 | 0,048 | 0,068 | 1 |
| Polr2b    | 0,182679 | 0,02413  | 0,336 | 0,401 | 1 |
| Nop58     | 0,182766 | 0,119888 | 0,294 | 0,272 | 1 |
| lqcg      | 0,182821 | -0,00962 | 0,02  | 0,034 | 1 |

|          |          |          |       |       |   |
|----------|----------|----------|-------|-------|---|
| Eva1c    | 0,182821 | -0,00962 | 0,02  | 0,034 | 1 |
| Mogat1   | 0,182918 | 0,023973 | 0,035 | 0,021 | 1 |
| Gm45890  | 0,183021 | -0,00605 | 0,009 | 0,019 | 1 |
| Tvp23bos | 0,183021 | -0,00605 | 0,009 | 0,019 | 1 |
| Trpv4    | 0,183024 | 0,02294  | 0,048 | 0,032 | 1 |
| Stk40    | 0,18305  | 0,074134 | 0,165 | 0,139 | 1 |
| Cct6b    | 0,1832   | -0,00656 | 0,009 | 0,019 | 1 |
| Dennd6a  | 0,183255 | -0,01568 | 0,261 | 0,304 | 1 |
| Ankrd27  | 0,183269 | 0,06938  | 0,206 | 0,179 | 1 |
| Zcchc17  | 0,183445 | -0,03626 | 0,684 | 0,713 | 1 |
| Zdhhc14  | 0,183584 | 0,071909 | 0,69  | 0,694 | 1 |
| Osbpl8   | 0,183618 | -0,00605 | 0,231 | 0,276 | 1 |
| Sp3      | 0,183846 | 0,082594 | 0,492 | 0,494 | 1 |
| Rfc1     | 0,18423  | -0,01199 | 0,635 | 0,713 | 1 |
| Zfp719   | 0,184291 | -0,01816 | 0,068 | 0,091 | 1 |
| Zbtb10   | 0,184304 | 0,0527   | 0,143 | 0,118 | 1 |
| Bhlhe22  | 0,184312 | -0,011   | 0,004 | 0,011 | 1 |
| Kcna6    | 0,184377 | -0,06003 | 0,763 | 0,825 | 1 |
| Tcte2    | 0,184494 | -0,00824 | 0,055 | 0,076 | 1 |
| Gm45869  | 0,184594 | -0,00424 | 0,009 | 0,019 | 1 |
| Pidd1    | 0,184805 | -0,00892 | 0,004 | 0,011 | 1 |
| Lingo3   | 0,184805 | -0,00892 | 0,004 | 0,011 | 1 |
| Gm20522  | 0,184805 | -0,00892 | 0,004 | 0,011 | 1 |
| Xkrx     | 0,184805 | -0,011   | 0,004 | 0,011 | 1 |
| Tmem147c | 0,184851 | -0,00783 | 0,02  | 0,034 | 1 |
| Me1      | 0,18515  | -0,02937 | 0,428 | 0,496 | 1 |
| Pex5     | 0,18518  | -0,02324 | 0,22  | 0,259 | 1 |
| Rpl31    | 0,185234 | -0,02022 | 0,961 | 0,96  | 1 |
| Galnt3   | 0,185298 | -0,00683 | 0,004 | 0,011 | 1 |
| Tfpi2    | 0,185298 | -0,00683 | 0,004 | 0,011 | 1 |
| Lmntd1   | 0,185298 | -0,00683 | 0,004 | 0,011 | 1 |
| Mtag2    | 0,185298 | -0,00683 | 0,004 | 0,011 | 1 |
| Igf1     | 0,185298 | -0,00683 | 0,004 | 0,011 | 1 |
| Pald     | 0,185298 | -0,00683 | 0,004 | 0,011 | 1 |
| Ncan     | 0,185298 | -0,00683 | 0,004 | 0,011 | 1 |
| Gm9725   | 0,185298 | -0,00683 | 0,004 | 0,011 | 1 |
| Opn4     | 0,185298 | -0,00683 | 0,004 | 0,011 | 1 |
| Mlip     | 0,185298 | -0,00683 | 0,004 | 0,011 | 1 |
| Mgat5b   | 0,185298 | -0,00683 | 0,004 | 0,011 | 1 |
| Ccdc40   | 0,185298 | -0,00683 | 0,004 | 0,011 | 1 |
| Hist1h3f | 0,185298 | -0,00683 | 0,004 | 0,011 | 1 |
| D630036H | 0,185298 | -0,00683 | 0,004 | 0,011 | 1 |
| Bcl11b   | 0,185298 | -0,00683 | 0,004 | 0,011 | 1 |
| Smco1    | 0,185298 | -0,00683 | 0,004 | 0,011 | 1 |
| Cdo1     | 0,185298 | -0,00683 | 0,004 | 0,011 | 1 |
| Epn2     | 0,185315 | 0,068205 | 0,982 | 0,985 | 1 |
| Hs2st1   | 0,185494 | 0,03132  | 0,33  | 0,395 | 1 |
| Wfdc12   | 0,185796 | -0,00942 | 0,004 | 0,011 | 1 |
| Cdh11    | 0,185844 | 0,003351 | 0,611 | 0,696 | 1 |
| Ano1     | 0,186044 | -0,00709 | 0,004 | 0,011 | 1 |
| Gm20463  | 0,186044 | -0,00709 | 0,004 | 0,011 | 1 |
| Adam28   | 0,186095 | 0,019303 | 0,029 | 0,017 | 1 |

|           |          |          |       |       |   |
|-----------|----------|----------|-------|-------|---|
| Ccdc57    | 0,18615  | 0,016356 | 0,024 | 0,013 | 1 |
| Fam210b   | 0,186189 | -0,02299 | 0,125 | 0,154 | 1 |
| Gm14424   | 0,186227 | 0,021909 | 0,035 | 0,021 | 1 |
| Prkd1     | 0,186293 | -0,00345 | 0,004 | 0,011 | 1 |
| Micu3     | 0,186306 | 0,003877 | 0,367 | 0,437 | 1 |
| Mlf1      | 0,186351 | 0,021909 | 0,035 | 0,021 | 1 |
| Saa3      | 0,186351 | 0,018394 | 0,035 | 0,021 | 1 |
| Cand1     | 0,186522 | 0,073591 | 0,352 | 0,333 | 1 |
| Sec16b    | 0,18654  | -0,005   | 0,004 | 0,011 | 1 |
| 2310040G  | 0,18654  | -0,005   | 0,004 | 0,011 | 1 |
| Gm12227   | 0,18654  | -0,005   | 0,004 | 0,011 | 1 |
| Myh3      | 0,18654  | -0,005   | 0,004 | 0,011 | 1 |
| Afmid     | 0,18654  | -0,005   | 0,004 | 0,011 | 1 |
| Gm47167   | 0,18654  | -0,005   | 0,004 | 0,011 | 1 |
| Gstcd     | 0,186745 | -0,01278 | 0,095 | 0,122 | 1 |
| Tbc1d23   | 0,186764 | 0,002776 | 0,406 | 0,473 | 1 |
| Dot1l     | 0,186841 | 0,002158 | 0,468 | 0,542 | 1 |
| Trmt1l    | 0,186874 | 0,015974 | 0,317 | 0,376 | 1 |
| Spryd3    | 0,186981 | -0,01953 | 0,183 | 0,219 | 1 |
| Akap1     | 0,187362 | 0,065866 | 0,206 | 0,179 | 1 |
| Bmt2      | 0,187381 | -0,00412 | 0,255 | 0,302 | 1 |
| Braf      | 0,187438 | 0,013281 | 0,382 | 0,454 | 1 |
| Atcayos   | 0,187457 | 0,007313 | 0,004 | 0     | 1 |
| Gm47604   | 0,187457 | 0,007313 | 0,004 | 0     | 1 |
| Fam83h    | 0,187457 | 0,007313 | 0,004 | 0     | 1 |
| Slc7a4    | 0,187457 | 0,007313 | 0,004 | 0     | 1 |
| Rsph1     | 0,187457 | 0,007313 | 0,004 | 0     | 1 |
| Gm38033   | 0,187457 | 0,003663 | 0,004 | 0     | 1 |
| March4    | 0,187457 | 0,003663 | 0,004 | 0     | 1 |
| Cd247     | 0,187457 | 0,003663 | 0,004 | 0     | 1 |
| Esrrg     | 0,187457 | 0,003663 | 0,004 | 0     | 1 |
| Camk1d    | 0,187457 | 0,003663 | 0,004 | 0     | 1 |
| Sfmbt2    | 0,187457 | 0,003663 | 0,004 | 0     | 1 |
| Tor4a     | 0,187457 | 0,003663 | 0,004 | 0     | 1 |
| Col5a1    | 0,187457 | 0,003663 | 0,004 | 0     | 1 |
| Ak8       | 0,187457 | 0,003663 | 0,004 | 0     | 1 |
| Kcnj3     | 0,187457 | 0,003663 | 0,004 | 0     | 1 |
| Cers6     | 0,187457 | 0,003663 | 0,004 | 0     | 1 |
| Dlx1      | 0,187457 | 0,003663 | 0,004 | 0     | 1 |
| Pde1a     | 0,187457 | 0,003663 | 0,004 | 0     | 1 |
| Ano3      | 0,187457 | 0,003663 | 0,004 | 0     | 1 |
| Oip5      | 0,187457 | 0,003663 | 0,004 | 0     | 1 |
| 2010308FC | 0,187457 | 0,003663 | 0,004 | 0     | 1 |
| Sox3      | 0,187457 | 0,003663 | 0,004 | 0     | 1 |
| C030034L1 | 0,187457 | 0,003663 | 0,004 | 0     | 1 |
| Ccna2     | 0,187457 | 0,003663 | 0,004 | 0     | 1 |
| Crabp2    | 0,187457 | 0,003663 | 0,004 | 0     | 1 |
| Lrrc39    | 0,187457 | 0,003663 | 0,004 | 0     | 1 |
| Gm42457   | 0,187457 | 0,003663 | 0,004 | 0     | 1 |
| Akna      | 0,187457 | 0,003663 | 0,004 | 0     | 1 |
| Matn1     | 0,187457 | 0,003663 | 0,004 | 0     | 1 |
| Gm26648   | 0,187457 | 0,003663 | 0,004 | 0     | 1 |

|           |          |          |       |   |   |
|-----------|----------|----------|-------|---|---|
| Gm10419   | 0,187457 | 0,003663 | 0,004 | 0 | 1 |
| Lhx5      | 0,187457 | 0,003663 | 0,004 | 0 | 1 |
| Cped1     | 0,187457 | 0,003663 | 0,004 | 0 | 1 |
| Fbxo41    | 0,187457 | 0,003663 | 0,004 | 0 | 1 |
| Cxcl12    | 0,187457 | 0,003663 | 0,004 | 0 | 1 |
| 9430041J1 | 0,187457 | 0,003663 | 0,004 | 0 | 1 |
| C5ar2     | 0,187457 | 0,003663 | 0,004 | 0 | 1 |
| Gm45187   | 0,187457 | 0,003663 | 0,004 | 0 | 1 |
| Gm10605   | 0,187457 | 0,003663 | 0,004 | 0 | 1 |
| Trim6     | 0,187457 | 0,003663 | 0,004 | 0 | 1 |
| Olfr678   | 0,187457 | 0,003663 | 0,004 | 0 | 1 |
| Mical2    | 0,187457 | 0,003663 | 0,004 | 0 | 1 |
| Ifitm2    | 0,187457 | 0,003663 | 0,004 | 0 | 1 |
| Mtfr2     | 0,187457 | 0,003663 | 0,004 | 0 | 1 |
| Sh3rf3    | 0,187457 | 0,003663 | 0,004 | 0 | 1 |
| Adora2a   | 0,187457 | 0,003663 | 0,004 | 0 | 1 |
| Dyrk2     | 0,187457 | 0,003663 | 0,004 | 0 | 1 |
| Gm44956   | 0,187457 | 0,003663 | 0,004 | 0 | 1 |
| Csmd1     | 0,187457 | 0,003663 | 0,004 | 0 | 1 |
| Smim18    | 0,187457 | 0,003663 | 0,004 | 0 | 1 |
| Pdgfrl    | 0,187457 | 0,003663 | 0,004 | 0 | 1 |
| 4932416K  | 0,187457 | 0,003663 | 0,004 | 0 | 1 |
| Dnaaf1    | 0,187457 | 0,003663 | 0,004 | 0 | 1 |
| Gm20735   | 0,187457 | 0,003663 | 0,004 | 0 | 1 |
| Piwil2    | 0,187457 | 0,003663 | 0,004 | 0 | 1 |
| Mmp12     | 0,187457 | 0,003663 | 0,004 | 0 | 1 |
| Slc37a2   | 0,187457 | 0,003663 | 0,004 | 0 | 1 |
| Bmp5      | 0,187457 | 0,003663 | 0,004 | 0 | 1 |
| Tpbp      | 0,187457 | 0,003663 | 0,004 | 0 | 1 |
| Gm47950   | 0,187457 | 0,003663 | 0,004 | 0 | 1 |
| Osbpl10   | 0,187457 | 0,003663 | 0,004 | 0 | 1 |
| Fam183b   | 0,187457 | 0,003663 | 0,004 | 0 | 1 |
| Rasd1     | 0,187457 | 0,003663 | 0,004 | 0 | 1 |
| Rilp      | 0,187457 | 0,003663 | 0,004 | 0 | 1 |
| Ush1g     | 0,187457 | 0,003663 | 0,004 | 0 | 1 |
| Plekhd1   | 0,187457 | 0,003663 | 0,004 | 0 | 1 |
| Gm15941   | 0,187457 | 0,003663 | 0,004 | 0 | 1 |
| 4930544F  | 0,187457 | 0,003663 | 0,004 | 0 | 1 |
| Gm29019   | 0,187457 | 0,003663 | 0,004 | 0 | 1 |
| Prr5      | 0,187457 | 0,003663 | 0,004 | 0 | 1 |
| Gm30085   | 0,187457 | 0,003663 | 0,004 | 0 | 1 |
| Ccdc184   | 0,187457 | 0,003663 | 0,004 | 0 | 1 |
| Rtl10     | 0,187457 | 0,003663 | 0,004 | 0 | 1 |
| D930030IC | 0,187457 | 0,003663 | 0,004 | 0 | 1 |
| Lca5l     | 0,187457 | 0,003663 | 0,004 | 0 | 1 |
| Ager      | 0,187457 | 0,003663 | 0,004 | 0 | 1 |
| B430306N  | 0,187457 | 0,003663 | 0,004 | 0 | 1 |
| Vav1      | 0,187457 | 0,003663 | 0,004 | 0 | 1 |
| Best1     | 0,187457 | 0,003663 | 0,004 | 0 | 1 |
| Kalrn     | 0,187458 | 0,021779 | 0,004 | 0 | 1 |
| Frmd3     | 0,187458 | 0,012762 | 0,004 | 0 | 1 |
| H2-M3     | 0,187458 | 0,012762 | 0,004 | 0 | 1 |

|           |          |          |       |       |   |
|-----------|----------|----------|-------|-------|---|
| Nrip3     | 0,187458 | 0,009132 | 0,004 | 0     | 1 |
| Hes1      | 0,187458 | 0,009132 | 0,004 | 0     | 1 |
| Nmbr      | 0,187458 | 0,007313 | 0,004 | 0     | 1 |
| Ccdc162   | 0,187458 | 0,007313 | 0,004 | 0     | 1 |
| Cdkl1     | 0,187458 | 0,007313 | 0,004 | 0     | 1 |
| Arg2      | 0,187458 | 0,007313 | 0,004 | 0     | 1 |
| Cfh       | 0,187458 | 0,005489 | 0,004 | 0     | 1 |
| Dusp9     | 0,187458 | 0,005489 | 0,004 | 0     | 1 |
| Arhgap4   | 0,187458 | 0,005489 | 0,004 | 0     | 1 |
| Vtcn1     | 0,187458 | 0,005489 | 0,004 | 0     | 1 |
| Atg4a-ps  | 0,187458 | 0,005489 | 0,004 | 0     | 1 |
| Adora3    | 0,187458 | 0,005489 | 0,004 | 0     | 1 |
| B4galt1   | 0,187458 | 0,005489 | 0,004 | 0     | 1 |
| 0610043K: | 0,187458 | 0,005489 | 0,004 | 0     | 1 |
| Tctex1d1  | 0,187458 | 0,005489 | 0,004 | 0     | 1 |
| Artn      | 0,187458 | 0,005489 | 0,004 | 0     | 1 |
| Hes5      | 0,187458 | 0,005489 | 0,004 | 0     | 1 |
| Nptx2     | 0,187458 | 0,005489 | 0,004 | 0     | 1 |
| Dysf      | 0,187458 | 0,005489 | 0,004 | 0     | 1 |
| Gabrb3    | 0,187458 | 0,005489 | 0,004 | 0     | 1 |
| Ctsc      | 0,187458 | 0,005489 | 0,004 | 0     | 1 |
| Pde2a     | 0,187458 | 0,005489 | 0,004 | 0     | 1 |
| Cracr2b   | 0,187458 | 0,005489 | 0,004 | 0     | 1 |
| Lrriq1    | 0,187458 | 0,005489 | 0,004 | 0     | 1 |
| Dusp4     | 0,187458 | 0,005489 | 0,004 | 0     | 1 |
| Olfr374   | 0,187458 | 0,005489 | 0,004 | 0     | 1 |
| Snx20     | 0,187458 | 0,005489 | 0,004 | 0     | 1 |
| Cpne6     | 0,187458 | 0,005489 | 0,004 | 0     | 1 |
| Ifi47     | 0,187458 | 0,005489 | 0,004 | 0     | 1 |
| Ar15c     | 0,187458 | 0,005489 | 0,004 | 0     | 1 |
| Fzd2      | 0,187458 | 0,005489 | 0,004 | 0     | 1 |
| Fmn11     | 0,187458 | 0,005489 | 0,004 | 0     | 1 |
| Lrr1      | 0,187458 | 0,005489 | 0,004 | 0     | 1 |
| Gm28370   | 0,187458 | 0,005489 | 0,004 | 0     | 1 |
| Efcab1    | 0,187458 | 0,005489 | 0,004 | 0     | 1 |
| March3    | 0,187458 | 0,005489 | 0,004 | 0     | 1 |
| Neurl4    | 0,187528 | 0,073934 | 0,292 | 0,268 | 1 |
| Mfsd4b1   | 0,187686 | -0,01776 | 0,024 | 0,038 | 1 |
| Tmem198   | 0,187788 | -0,00318 | 0,004 | 0,011 | 1 |
| Gm12905   | 0,187788 | -0,00318 | 0,004 | 0,011 | 1 |
| Cftr      | 0,187788 | -0,00318 | 0,004 | 0,011 | 1 |
| Angpt1    | 0,187788 | -0,00318 | 0,004 | 0,011 | 1 |
| Zfp109    | 0,187788 | -0,00136 | 0,004 | 0,011 | 1 |
| Gins2     | 0,187806 | -0,01453 | 0,088 | 0,114 | 1 |
| Tars      | 0,187909 | -0,01965 | 0,224 | 0,264 | 1 |
| Sema4c    | 0,188008 | 0,071731 | 0,31  | 0,285 | 1 |
| Zfp52     | 0,188132 | 0,012491 | 0,024 | 0,013 | 1 |
| Ppp6r1    | 0,188135 | -0,01509 | 0,29  | 0,338 | 1 |
| Sntb2     | 0,1884   | -0,0143  | 0,055 | 0,076 | 1 |
| Wdr24     | 0,188485 | -0,01453 | 0,064 | 0,086 | 1 |
| Camta2    | 0,188669 | -0,00477 | 0,18  | 0,217 | 1 |
| Tcf20     | 0,188693 | -0,01536 | 0,222 | 0,262 | 1 |

|            |          |          |       |       |   |
|------------|----------|----------|-------|-------|---|
| Lrpap1     | 0,18886  | -0,00931 | 0,646 | 0,717 | 1 |
| Snx4       | 0,189029 | -0,01484 | 0,305 | 0,357 | 1 |
| Stxbp4     | 0,189091 | -0,01109 | 0,106 | 0,135 | 1 |
| Slc7a6     | 0,18913  | -0,01453 | 0,086 | 0,112 | 1 |
| Irak2      | 0,189398 | -0,01315 | 0,059 | 0,08  | 1 |
| Fam91a1    | 0,18942  | 0,087436 | 0,411 | 0,399 | 1 |
| Gm12802    | 0,189446 | -0,00987 | 0,022 | 0,036 | 1 |
| Slc12a9    | 0,189456 | 0,084362 | 0,459 | 0,454 | 1 |
| Vps13c     | 0,189466 | 0,016308 | 0,264 | 0,319 | 1 |
| Ak3        | 0,189469 | 0,041313 | 0,921 | 0,878 | 1 |
| Rps16      | 0,189694 | 0,005843 | 0,993 | 0,992 | 1 |
| Socs7      | 0,189862 | 0,068734 | 0,182 | 0,156 | 1 |
| Klc2       | 0,190117 | 0,031125 | 0,084 | 0,063 | 1 |
| Galc       | 0,190492 | 0,096354 | 0,477 | 0,473 | 1 |
| Tsc1       | 0,190506 | 0,067993 | 0,558 | 0,574 | 1 |
| 1700017B   | 0,190856 | 0,026694 | 0,055 | 0,038 | 1 |
| St6galnac6 | 0,191062 | -0,00848 | 0,057 | 0,078 | 1 |
| Lsm14b     | 0,191157 | -0,00824 | 0,314 | 0,371 | 1 |
| Eif5a2     | 0,191226 | 0,003192 | 0,207 | 0,253 | 1 |
| Slc35d1    | 0,191317 | -0,01662 | 0,086 | 0,112 | 1 |
| Exo5       | 0,19137  | -0,00752 | 0,051 | 0,072 | 1 |
| Asic1      | 0,191439 | -0,01394 | 0,024 | 0,038 | 1 |
| Axin2      | 0,191516 | -0,01734 | 0,068 | 0,091 | 1 |
| B930082K   | 0,191795 | 0,035986 | 0,055 | 0,038 | 1 |
| Ago3       | 0,191982 | 0,074676 | 0,659 | 0,66  | 1 |
| Crmp1      | 0,192088 | 0,030932 | 0,084 | 0,063 | 1 |
| Wrnip1     | 0,192191 | -0,01347 | 0,229 | 0,272 | 1 |
| Klhl9      | 0,192465 | 0,009953 | 0,404 | 0,481 | 1 |
| Slc30a7    | 0,192799 | -0,00779 | 0,15  | 0,184 | 1 |
| Zfp691     | 0,192931 | -0,008   | 0,053 | 0,074 | 1 |
| Zfp110     | 0,192952 | 0,016545 | 0,262 | 0,316 | 1 |
| Kank2      | 0,193477 | -0,0116  | 0,101 | 0,129 | 1 |
| Abca7      | 0,193513 | -0,01009 | 0,121 | 0,152 | 1 |
| Enkd1      | 0,193835 | 0,031731 | 0,042 | 0,027 | 1 |
| Gpt2       | 0,193865 | -0,01138 | 0,255 | 0,297 | 1 |
| Smrbc1     | 0,193998 | 0,001392 | 0,582 | 0,673 | 1 |
| Fam185a    | 0,19403  | -0,01596 | 0,026 | 0,04  | 1 |
| Slc16a6    | 0,194071 | 0,001639 | 0,132 | 0,165 | 1 |
| Ctif       | 0,194277 | -0,01685 | 0,237 | 0,278 | 1 |
| Clk2       | 0,19433  | 0,000681 | 0,215 | 0,257 | 1 |
| Nudt11     | 0,194342 | -0,00674 | 0,101 | 0,129 | 1 |
| Spryd7     | 0,194756 | -0,0049  | 0,378 | 0,439 | 1 |
| Angptl2    | 0,194968 | 0,022626 | 0,015 | 0,006 | 1 |
| Adgrb2     | 0,195246 | -0,00788 | 0,108 | 0,137 | 1 |
| Spdya      | 0,195271 | -0,01086 | 0,024 | 0,038 | 1 |
| Rps20      | 0,195313 | -0,01104 | 0,976 | 0,989 | 1 |
| Aup1       | 0,195502 | -0,01643 | 0,536 | 0,603 | 1 |
| Ano10      | 0,19551  | -0,01191 | 0,38  | 0,437 | 1 |
| Ssna1      | 0,195553 | 0,081074 | 0,655 | 0,677 | 1 |
| Polr1b     | 0,195763 | 0,036186 | 0,095 | 0,074 | 1 |
| Dennd2a    | 0,195813 | -0,02809 | 0,174 | 0,207 | 1 |
| Scamp2     | 0,195897 | 0,075732 | 0,64  | 0,654 | 1 |



|           |          |          |       |       |   |
|-----------|----------|----------|-------|-------|---|
| Trp53rkb  | 0,196237 | -0,0099  | 0,073 | 0,097 | 1 |
| Tmsb15b2  | 0,196747 | -0,00993 | 0,011 | 0,021 | 1 |
| Plcg2     | 0,196747 | -0,00993 | 0,011 | 0,021 | 1 |
| Vcan      | 0,196747 | -0,00993 | 0,011 | 0,021 | 1 |
| Cenpk     | 0,196747 | -0,00993 | 0,011 | 0,021 | 1 |
| AC132444. | 0,196747 | -0,00993 | 0,011 | 0,021 | 1 |
| Trim12c   | 0,196821 | 0,013673 | 0,015 | 0,006 | 1 |
| Lgr5      | 0,196821 | 0,01547  | 0,015 | 0,006 | 1 |
| Vav3      | 0,196823 | 0,020532 | 0,015 | 0,006 | 1 |
| Serinc3   | 0,196884 | 0,057261 | 0,912 | 0,914 | 1 |
| Trim28    | 0,196926 | -0,01428 | 0,495 | 0,576 | 1 |
| 1700025Gf | 0,197205 | -0,00545 | 0,435 | 0,517 | 1 |
| Zdhhc1    | 0,197348 | -0,03159 | 0,143 | 0,173 | 1 |
| Smad4     | 0,197374 | 0,091408 | 0,453 | 0,46  | 1 |
| Gm48914   | 0,197441 | 0,011873 | 0,015 | 0,006 | 1 |
| Vwa3b     | 0,197442 | -0,01018 | 0,011 | 0,021 | 1 |
| Phyhd1    | 0,197442 | -0,01018 | 0,011 | 0,021 | 1 |
| Fzd9      | 0,197488 | -0,00656 | 0,024 | 0,038 | 1 |
| Dusp10    | 0,197797 | 0,165082 | 0,417 | 0,418 | 1 |
| Fam13b    | 0,197865 | -0,00781 | 0,239 | 0,285 | 1 |
| Ick       | 0,197896 | -0,00605 | 0,536 | 0,612 | 1 |
| Anxa9     | 0,198061 | 0,01007  | 0,015 | 0,006 | 1 |
| Sh3d21    | 0,198061 | 0,01007  | 0,015 | 0,006 | 1 |
| Gm26809   | 0,198061 | 0,01007  | 0,015 | 0,006 | 1 |
| Olfr539   | 0,198061 | 0,01007  | 0,015 | 0,006 | 1 |
| Gm15965   | 0,198061 | 0,01007  | 0,015 | 0,006 | 1 |
| Togaram1  | 0,198083 | -0,0241  | 0,16  | 0,192 | 1 |
| Anxa7     | 0,19812  | 0,068734 | 0,182 | 0,156 | 1 |
| Slc16a10  | 0,198273 | 0,01517  | 0,015 | 0,006 | 1 |
| Tatdn1    | 0,198288 | -0,01793 | 0,189 | 0,226 | 1 |
| Gm36445   | 0,198475 | -0,00631 | 0,011 | 0,021 | 1 |
| Ripk4     | 0,198475 | -0,00812 | 0,011 | 0,021 | 1 |
| Hcn1      | 0,198482 | 0,014572 | 0,015 | 0,006 | 1 |
| Acsl1     | 0,198549 | -0,02787 | 0,681 | 0,734 | 1 |
| Gm10791   | 0,198896 | 0,040527 | 0,112 | 0,089 | 1 |
| Xkr4      | 0,198925 | 0,004725 | 0,121 | 0,152 | 1 |
| Ramp2     | 0,199    | -0,00862 | 0,011 | 0,021 | 1 |
| Gm48022   | 0,199173 | -0,00837 | 0,011 | 0,021 | 1 |
| Abr       | 0,199346 | -0,00656 | 0,011 | 0,021 | 1 |
| Appl2     | 0,199431 | 0,021089 | 0,561 | 0,643 | 1 |
| Pck2      | 0,199521 | 0,009489 | 0,015 | 0,006 | 1 |
| Myadm     | 0,199702 | -0,00698 | 0,095 | 0,122 | 1 |
| Gm34788   | 0,19973  | 0,007975 | 0,015 | 0,006 | 1 |
| Kat6b     | 0,199751 | 0,004153 | 0,215 | 0,257 | 1 |
| Zfp354c   | 0,199797 | -0,01863 | 0,13  | 0,16  | 1 |
| E130309Df | 0,199881 | -0,02001 | 0,132 | 0,162 | 1 |
| Fuca2     | 0,200124 | -0,01209 | 0,158 | 0,192 | 1 |
| Kif20b    | 0,200135 | -0,00352 | 0,024 | 0,038 | 1 |
| Gm26682   | 0,200142 | 0,030643 | 0,037 | 0,023 | 1 |
| Gm42421   | 0,200213 | -0,00631 | 0,011 | 0,021 | 1 |
| Pcdhgc3   | 0,200213 | -0,00631 | 0,011 | 0,021 | 1 |
| H3f3aos   | 0,200213 | -0,0027  | 0,011 | 0,021 | 1 |

|           |          |          |       |       |   |
|-----------|----------|----------|-------|-------|---|
| Gm1976    | 0,200213 | -0,0027  | 0,011 | 0,021 | 1 |
| Pdxk      | 0,200299 | 0,093215 | 0,317 | 0,295 | 1 |
| Gm49130   | 0,200322 | -0,01037 | 0,026 | 0,04  | 1 |
| Fam193b   | 0,200556 | 0,091399 | 0,376 | 0,354 | 1 |
| Dclre1a   | 0,200688 | -0,00559 | 0,106 | 0,135 | 1 |
| Gm29325   | 0,200706 | 0,035556 | 0,088 | 0,068 | 1 |
| Cldn12    | 0,200913 | -0,00414 | 0,072 | 0,095 | 1 |
| Ppp2r2d   | 0,201081 | 0,000517 | 0,497 | 0,58  | 1 |
| Cfdp1     | 0,201309 | -0,02456 | 0,75  | 0,791 | 1 |
| Slc9a8    | 0,20142  | -0,00841 | 0,244 | 0,289 | 1 |
| Git2      | 0,201582 | 0,094252 | 0,587 | 0,589 | 1 |
| Lig1      | 0,201598 | -0,00123 | 0,248 | 0,293 | 1 |
| Rps8      | 0,201714 | 0,076106 | 1     | 1     | 1 |
| Mcu       | 0,201743 | -0,0226  | 0,119 | 0,148 | 1 |
| Fam3c     | 0,201952 | 0,038259 | 0,222 | 0,19  | 1 |
| Rhpn2     | 0,20226  | -7,7E-05 | 0,294 | 0,348 | 1 |
| Bcl2l13   | 0,202286 | 0,042743 | 0,143 | 0,118 | 1 |
| Pi4ka     | 0,202446 | -0,01017 | 0,402 | 0,462 | 1 |
| Parp1     | 0,202694 | -0,00481 | 0,317 | 0,376 | 1 |
| Crybg2    | 0,203106 | 0,029944 | 0,064 | 0,046 | 1 |
| Naprt     | 0,203241 | 0,017716 | 0,062 | 0,044 | 1 |
| Tpmt      | 0,203319 | -0,01093 | 0,165 | 0,2   | 1 |
| Prkacb    | 0,203323 | 0,055085 | 0,991 | 0,979 | 1 |
| Vkorc1l1  | 0,20336  | 0,087432 | 0,354 | 0,344 | 1 |
| Haus2     | 0,203423 | -0,00157 | 0,314 | 0,369 | 1 |
| Gab3      | 0,203548 | -0,00938 | 0,011 | 0,021 | 1 |
| Agfg1     | 0,203605 | 0,012762 | 0,499 | 0,574 | 1 |
| Ube4b     | 0,203816 | 0,09127  | 0,424 | 0,418 | 1 |
| Qpct      | 0,203926 | 0,116277 | 0,495 | 0,508 | 1 |
| Armc5     | 0,203994 | -0,0218  | 0,088 | 0,112 | 1 |
| Nat2      | 0,204186 | -0,01311 | 0,028 | 0,042 | 1 |
| Lrig1     | 0,204241 | -0,00629 | 0,07  | 0,093 | 1 |
| AC123724. | 0,204318 | 0,023662 | 0,037 | 0,023 | 1 |
| Cep162    | 0,204355 | 0,002515 | 0,176 | 0,215 | 1 |
| Pcsk2     | 0,204503 | 0,006632 | 0,119 | 0,15  | 1 |
| Nkx2-2os  | 0,20476  | -0,00175 | 0,028 | 0,042 | 1 |
| Def8      | 0,204911 | -0,00812 | 0,2   | 0,241 | 1 |
| Plcg1     | 0,205201 | -0,01943 | 0,211 | 0,249 | 1 |
| Pfkfb4    | 0,205338 | 0,070717 | 0,191 | 0,167 | 1 |
| Slc41a3   | 0,205617 | 0,023551 | 0,05  | 0,034 | 1 |
| Uckl1os   | 0,205723 | 0,023662 | 0,037 | 0,023 | 1 |
| Ascc2     | 0,205832 | -0,02362 | 0,198 | 0,234 | 1 |
| Mms19     | 0,206328 | 0,047763 | 0,193 | 0,165 | 1 |
| Cep83     | 0,206469 | -0,01375 | 0,218 | 0,257 | 1 |
| Mrps2     | 0,206824 | -0,01954 | 0,106 | 0,133 | 1 |
| Aldh4a1   | 0,207098 | -0,00312 | 0,125 | 0,156 | 1 |
| Lig3      | 0,207117 | 0,005668 | 0,461 | 0,538 | 1 |
| 5430431A: | 0,207157 | 0,035093 | 0,081 | 0,061 | 1 |
| Rps26     | 0,207337 | 0,032916 | 0,985 | 0,992 | 1 |
| Chic1     | 0,207476 | -0,00168 | 0,222 | 0,264 | 1 |
| Trove2    | 0,207511 | 0,118205 | 0,613 | 0,639 | 1 |
| Gpr173    | 0,207814 | -0,00908 | 0,028 | 0,042 | 1 |

|          |          |          |       |       |   |
|----------|----------|----------|-------|-------|---|
| Suz12    | 0,207849 | 0,021018 | 0,339 | 0,405 | 1 |
| Nadsyn1  | 0,208404 | -0,01536 | 0,033 | 0,049 | 1 |
| Rab5b    | 0,208671 | -0,01816 | 0,618 | 0,705 | 1 |
| Ccdc173  | 0,208677 | -0,00248 | 0,07  | 0,093 | 1 |
| Strn4    | 0,208778 | 0,091839 | 0,631 | 0,652 | 1 |
| Cad      | 0,208821 | 0,032168 | 0,088 | 0,068 | 1 |
| Cdc73    | 0,209358 | 0,086803 | 0,404 | 0,399 | 1 |
| Lzts3    | 0,209386 | -0,02101 | 0,132 | 0,16  | 1 |
| Gm10561  | 0,209645 | -0,00529 | 0,028 | 0,042 | 1 |
| Pnpla7   | 0,209753 | -0,01677 | 0,112 | 0,139 | 1 |
| Rnf41    | 0,210394 | -0,01619 | 0,248 | 0,289 | 1 |
| Tln1     | 0,210436 | 0,073861 | 0,716 | 0,73  | 1 |
| Synm     | 0,210742 | 0,092223 | 0,791 | 0,8   | 1 |
| Sox12    | 0,210901 | 0,003177 | 0,158 | 0,194 | 1 |
| Cnot6l   | 0,211052 | 0,025328 | 0,361 | 0,43  | 1 |
| Ufd1     | 0,211554 | -0,01524 | 0,552 | 0,624 | 1 |
| Tnfaip8  | 0,211683 | 0,020764 | 0,031 | 0,019 | 1 |
| Glyr1    | 0,211841 | 0,088289 | 0,558 | 0,582 | 1 |
| Mbd6     | 0,211902 | 0,064873 | 0,323 | 0,304 | 1 |
| Mast4    | 0,211975 | 0,046603 | 0,991 | 0,996 | 1 |
| Lcor     | 0,211995 | -0,00545 | 0,228 | 0,268 | 1 |
| Rps11    | 0,212221 | 0,003544 | 0,993 | 0,989 | 1 |
| Efcab7   | 0,212608 | -0,01134 | 0,031 | 0,046 | 1 |
| Hhip     | 0,212705 | 0,016457 | 0,545 | 0,622 | 1 |
| Epha5    | 0,212844 | -0,00429 | 0,031 | 0,046 | 1 |
| Gm26735  | 0,21304  | 0,018442 | 0,02  | 0,011 | 1 |
| Fnbp1l   | 0,21304  | 0,022001 | 0,02  | 0,011 | 1 |
| Rap1gds1 | 0,213094 | 0,044814 | 0,822 | 0,806 | 1 |
| Dnajc25  | 0,213123 | -0,01452 | 0,105 | 0,131 | 1 |
| Dnajc1   | 0,213221 | -0,00131 | 0,378 | 0,432 | 1 |
| Phlpp2   | 0,213317 | 0,035525 | 0,125 | 0,101 | 1 |
| Zfp960   | 0,213343 | -0,00862 | 0,013 | 0,023 | 1 |
| Zfp512b  | 0,21349  | -0,01537 | 0,117 | 0,146 | 1 |
| A430106G | 0,21366  | 0,064068 | 0,128 | 0,105 | 1 |
| Sf3a1    | 0,213838 | -0,01769 | 0,316 | 0,365 | 1 |
| Hectd1   | 0,213886 | 0,084058 | 0,776 | 0,81  | 1 |
| Rtf1     | 0,213922 | 0,074636 | 0,705 | 0,715 | 1 |
| Ccdc122  | 0,21395  | 0,016658 | 0,02  | 0,011 | 1 |
| Aurka    | 0,21395  | 0,018442 | 0,02  | 0,011 | 1 |
| Fbxl21   | 0,214989 | 0,023973 | 0,031 | 0,019 | 1 |
| Gsto1    | 0,215077 | -0,0216  | 0,149 | 0,177 | 1 |
| Cds1     | 0,215128 | 0,001682 | 0,15  | 0,186 | 1 |
| Asb7     | 0,21542  | 0,002673 | 0,222 | 0,264 | 1 |
| Slc16a3  | 0,215659 | -0,01606 | 0,035 | 0,051 | 1 |
| Adgra2   | 0,215778 | 0,01487  | 0,02  | 0,011 | 1 |
| Syk      | 0,215784 | 0,016356 | 0,02  | 0,011 | 1 |
| Nr1h2    | 0,216079 | -0,00101 | 0,534 | 0,62  | 1 |
| Slc25a51 | 0,216234 | 0,079074 | 0,622 | 0,637 | 1 |
| Wtip     | 0,216261 | -0,00026 | 0,029 | 0,044 | 1 |
| Gm16958  | 0,216288 | -0,02244 | 0,051 | 0,07  | 1 |
| Nsg1     | 0,216327 | -0,0185  | 0,037 | 0,053 | 1 |
| Smg6     | 0,216383 | 0,049757 | 0,336 | 0,409 | 1 |

|          |          |          |       |       |   |
|----------|----------|----------|-------|-------|---|
| Etohd2   | 0,216479 | -0,0185  | 0,04  | 0,057 | 1 |
| Gm17354  | 0,216579 | -0,01419 | 0,075 | 0,097 | 1 |
| Npm1     | 0,216589 | -0,00923 | 0,932 | 0,935 | 1 |
| Mybl2    | 0,216695 | 0,01487  | 0,02  | 0,011 | 1 |
| Ccdc63   | 0,216695 | 0,011286 | 0,02  | 0,011 | 1 |
| Zfp592   | 0,216724 | -0,0218  | 0,178 | 0,209 | 1 |
| Hey2     | 0,216862 | 0,028435 | 0,026 | 0,015 | 1 |
| Fam76a   | 0,217134 | -0,00572 | 0,673 | 0,738 | 1 |
| Megf9    | 0,217457 | -0,0048  | 0,481 | 0,563 | 1 |
| Gm26901  | 0,217509 | -0,01254 | 0,035 | 0,051 | 1 |
| Rttn     | 0,21791  | 0,043393 | 0,101 | 0,08  | 1 |
| Pclaf    | 0,217991 | 0,019609 | 0,026 | 0,015 | 1 |
| Cdc14a   | 0,217997 | 0,007888 | 0,139 | 0,171 | 1 |
| Dgkd     | 0,218112 | 0,068706 | 0,35  | 0,327 | 1 |
| Gldn     | 0,218475 | 0,021153 | 0,011 | 0,004 | 1 |
| Supt20   | 0,218653 | 0,019991 | 0,417 | 0,494 | 1 |
| Lifr     | 0,218789 | 0,024269 | 0,466 | 0,559 | 1 |
| Astn1    | 0,218918 | 0,007119 | 0,02  | 0,011 | 1 |
| Arhgap32 | 0,218926 | 0,093916 | 0,367 | 0,365 | 1 |
| Junos    | 0,218998 | 0,013972 | 0,011 | 0,004 | 1 |
| Cdkn2aip | 0,219116 | 0,019005 | 0,22  | 0,264 | 1 |
| Nrep     | 0,219133 | 0,015757 | 0,026 | 0,015 | 1 |
| BC034090 | 0,219464 | 0,068389 | 0,2   | 0,177 | 1 |
| Tmem138  | 0,219488 | -0,01635 | 0,114 | 0,141 | 1 |
| Gsap     | 0,219521 | 0,015772 | 0,011 | 0,004 | 1 |
| Tnfsf11  | 0,219521 | 0,015772 | 0,011 | 0,004 | 1 |
| Zc3hav1l | 0,219521 | 0,013972 | 0,011 | 0,004 | 1 |
| Npff     | 0,219521 | 0,021153 | 0,011 | 0,004 | 1 |
| Pid1     | 0,219521 | 0,017569 | 0,011 | 0,004 | 1 |
| Terf2    | 0,219557 | -0,00107 | 0,231 | 0,274 | 1 |
| Lclat1   | 0,219563 | -0,02009 | 0,068 | 0,089 | 1 |
| Zfp955a  | 0,219626 | -0,01006 | 0,037 | 0,053 | 1 |
| Gnaz     | 0,219823 | -0,015   | 0,04  | 0,057 | 1 |
| D6Wsu163 | 0,219826 | -0,02423 | 0,114 | 0,139 | 1 |
| Thoc1    | 0,219829 | -0,00357 | 0,207 | 0,247 | 1 |
| Pcdhgb5  | 0,22002  | -0,01103 | 0,037 | 0,053 | 1 |
| Tmem59l  | 0,220042 | -0,01679 | 0,204 | 0,236 | 1 |
| Spp2     | 0,220045 | 0,010362 | 0,011 | 0,004 | 1 |
| Birc5    | 0,220045 | 0,010362 | 0,011 | 0,004 | 1 |
| Arhgap26 | 0,220045 | 0,010362 | 0,011 | 0,004 | 1 |
| Smc1b    | 0,220045 | 0,017569 | 0,011 | 0,004 | 1 |
| Plekha7  | 0,220045 | 0,012168 | 0,011 | 0,004 | 1 |
| Tram1    | 0,220248 | -0,00688 | 0,367 | 0,426 | 1 |
| Setdb2   | 0,220504 | -0,01822 | 0,081 | 0,103 | 1 |
| Plxnd1   | 0,220569 | 0,008552 | 0,011 | 0,004 | 1 |
| Cebpa    | 0,220569 | 0,008552 | 0,011 | 0,004 | 1 |
| Slc10a1  | 0,220569 | 0,008552 | 0,011 | 0,004 | 1 |
| Osmr     | 0,220569 | 0,008552 | 0,011 | 0,004 | 1 |
| Gm28285  | 0,220569 | 0,008552 | 0,011 | 0,004 | 1 |
| Rab8b    | 0,220657 | -0,00644 | 0,257 | 0,302 | 1 |
| Grid1    | 0,220835 | 0,01547  | 0,011 | 0,004 | 1 |
| Ranbp10  | 0,221049 | -0,00687 | 0,202 | 0,238 | 1 |

|          |          |          |       |       |   |
|----------|----------|----------|-------|-------|---|
| Zfp354b  | 0,22106  | -0,01079 | 0,035 | 0,051 | 1 |
| Olfr742  | 0,221094 | 0,006738 | 0,011 | 0,004 | 1 |
| Gm9837   | 0,221094 | 0,006738 | 0,011 | 0,004 | 1 |
| Erbp2    | 0,221094 | 0,006738 | 0,011 | 0,004 | 1 |
| Msx2     | 0,221094 | 0,006738 | 0,011 | 0,004 | 1 |
| Cnih2    | 0,221094 | 0,006738 | 0,011 | 0,004 | 1 |
| Xylt2    | 0,221148 | -0,01719 | 0,086 | 0,11  | 1 |
| BC005561 | 0,22124  | 0,005078 | 0,538 | 0,62  | 1 |
| Arl4a    | 0,221439 | -0,00605 | 0,167 | 0,2   | 1 |
| Gm32296  | 0,221817 | -0,01273 | 0,015 | 0,025 | 1 |
| 28104740 | 0,22199  | 0,008425 | 0,321 | 0,38  | 1 |
| Naa30    | 0,222309 | 0,065843 | 0,314 | 0,291 | 1 |
| Ctnna2   | 0,222393 | -0,05075 | 0,428 | 0,475 | 1 |
| Fam46c   | 0,222417 | -0,0019  | 0,011 | 0,004 | 1 |
| Dnajc13  | 0,22254  | -0,00936 | 0,323 | 0,376 | 1 |
| Gatad2a  | 0,222576 | 0,003273 | 0,42  | 0,489 | 1 |
| Kars     | 0,222604 | -0,0027  | 0,356 | 0,414 | 1 |
| Ccdc84   | 0,222671 | -0,02743 | 0,147 | 0,175 | 1 |
| Fam83f   | 0,222681 | 0,000456 | 0,011 | 0,004 | 1 |
| Mis18a   | 0,223009 | -0,00806 | 0,035 | 0,051 | 1 |
| Gm21994  | 0,223195 | -0,00917 | 0,006 | 0,013 | 1 |
| Gm26846  | 0,223195 | -0,00917 | 0,006 | 0,013 | 1 |
| Ajap1    | 0,223233 | 0,028248 | 0,051 | 0,036 | 1 |
| Ripk2    | 0,223516 | -0,01349 | 0,044 | 0,061 | 1 |
| Pld1     | 0,223638 | -0,00747 | 0,325 | 0,371 | 1 |
| Gm20404  | 0,223641 | -0,015   | 0,046 | 0,063 | 1 |
| Fam83a   | 0,223698 | -0,0115  | 0,006 | 0,013 | 1 |
| Psmb10   | 0,223718 | 0,008964 | 0,138 | 0,169 | 1 |
| Serpinh1 | 0,223774 | 0,022637 | 0,051 | 0,036 | 1 |
| Smchd1   | 0,22385  | 0,130712 | 0,495 | 0,504 | 1 |
| Rims1    | 0,223945 | -0,00709 | 0,006 | 0,013 | 1 |
| Gm26801  | 0,223945 | -0,00709 | 0,006 | 0,013 | 1 |
| Nabl     | 0,223945 | -0,00709 | 0,006 | 0,013 | 1 |
| Gm14091  | 0,223945 | -0,00709 | 0,006 | 0,013 | 1 |
| Cfap74   | 0,223945 | -0,00709 | 0,006 | 0,013 | 1 |
| Gm14508  | 0,223945 | -0,00709 | 0,006 | 0,013 | 1 |
| Smyd1    | 0,223945 | -0,00709 | 0,006 | 0,013 | 1 |
| Olfr552  | 0,223945 | -0,00709 | 0,006 | 0,013 | 1 |
| Esco2    | 0,223945 | -0,00709 | 0,006 | 0,013 | 1 |
| Slc28a3  | 0,223945 | -0,00709 | 0,006 | 0,013 | 1 |
| 2810032G | 0,223945 | -0,00709 | 0,006 | 0,013 | 1 |
| Al463170 | 0,223945 | -0,00709 | 0,006 | 0,013 | 1 |
| Gm5093   | 0,223945 | -0,00709 | 0,006 | 0,013 | 1 |
| Nme5     | 0,223945 | -0,00709 | 0,006 | 0,013 | 1 |
| Ccdc74a  | 0,223949 | -0,00942 | 0,006 | 0,013 | 1 |
| Esrra    | 0,224165 | -0,0093  | 0,106 | 0,133 | 1 |
| Spata2l  | 0,224442 | 0,024356 | 0,051 | 0,036 | 1 |
| Lpp      | 0,224451 | -0,0076  | 0,006 | 0,013 | 1 |
| Diaph3   | 0,224509 | -0,00502 | 0,015 | 0,025 | 1 |
| Micu1    | 0,224668 | -0,02946 | 0,631 | 0,684 | 1 |
| 4930515G | 0,224701 | -0,00735 | 0,006 | 0,013 | 1 |
| 0610005C | 0,224701 | -0,00735 | 0,006 | 0,013 | 1 |

|           |          |          |       |       |   |
|-----------|----------|----------|-------|-------|---|
| Pex11g    | 0,224902 | -0,01292 | 0,057 | 0,076 | 1 |
| Fxyd6     | 0,224953 | 0,015757 | 0,006 | 0,013 | 1 |
| Gm13375   | 0,225155 | -0,01727 | 0,061 | 0,08  | 1 |
| Ube2l3    | 0,225237 | -0,02725 | 0,936 | 0,949 | 1 |
| Unc13d    | 0,225239 | 0,026842 | 0,039 | 0,025 | 1 |
| Ap3d1     | 0,225255 | 0,092085 | 0,428 | 0,422 | 1 |
| Gm43518   | 0,225455 | -0,00163 | 0,006 | 0,013 | 1 |
| Arhgef4   | 0,225455 | -0,00527 | 0,006 | 0,013 | 1 |
| Itga10    | 0,225455 | -0,00527 | 0,006 | 0,013 | 1 |
| Krtcap3   | 0,225455 | -0,00527 | 0,006 | 0,013 | 1 |
| Gm17092   | 0,225455 | -0,00527 | 0,006 | 0,013 | 1 |
| Gm15637   | 0,225455 | -0,00527 | 0,006 | 0,013 | 1 |
| Gm48740   | 0,225455 | -0,00527 | 0,006 | 0,013 | 1 |
| Nprl3     | 0,22546  | -0,02796 | 0,103 | 0,127 | 1 |
| Timm23    | 0,225764 | -0,00904 | 0,039 | 0,055 | 1 |
| Tspan17   | 0,226197 | -0,01532 | 0,49  | 0,551 | 1 |
| Enox1     | 0,226249 | 0,000938 | 0,358 | 0,42  | 1 |
| Adal      | 0,226353 | -0,00697 | 0,11  | 0,137 | 1 |
| Tns2      | 0,226518 | 0,029498 | 0,134 | 0,11  | 1 |
| Foxo3     | 0,226552 | 0,003942 | 0,246 | 0,291 | 1 |
| 5330413P: | 0,226553 | -0,00682 | 0,015 | 0,025 | 1 |
| Fam135b   | 0,226553 | -0,00682 | 0,015 | 0,025 | 1 |
| Fam234b   | 0,226606 | 0,08277  | 0,448 | 0,439 | 1 |
| Pcsk6     | 0,226881 | 0,081682 | 0,596 | 0,608 | 1 |
| Gm49289   | 0,226972 | -0,00345 | 0,006 | 0,013 | 1 |
| Arhgap21  | 0,227399 | 0,091415 | 0,567 | 0,574 | 1 |
| Rufy1     | 0,22741  | -0,00399 | 0,508 | 0,582 | 1 |
| Tbc1d22b  | 0,227451 | -0,01193 | 0,25  | 0,287 | 1 |
| Ssbp3     | 0,227578 | 0,10077  | 0,367 | 0,363 | 1 |
| P4htm     | 0,227961 | 0,067881 | 0,374 | 0,359 | 1 |
| Htatip2   | 0,227969 | 0,032591 | 0,061 | 0,044 | 1 |
| Mgat1     | 0,228039 | -0,01817 | 0,253 | 0,293 | 1 |
| Epn1      | 0,228088 | -0,01466 | 0,591 | 0,665 | 1 |
| Ppm1f     | 0,22817  | -0,01287 | 0,206 | 0,243 | 1 |
| Exosc2    | 0,228609 | -0,02478 | 0,198 | 0,232 | 1 |
| 4831440E1 | 0,22861  | -0,00502 | 0,015 | 0,025 | 1 |
| Rsb1      | 0,228728 | 0,018266 | 0,387 | 0,456 | 1 |
| B3galt4   | 0,228786 | -0,01407 | 0,068 | 0,089 | 1 |
| Vrk2      | 0,229039 | -0,01533 | 0,059 | 0,078 | 1 |
| Rnpepl1   | 0,229268 | 0,071681 | 0,633 | 0,662 | 1 |
| Zfp839    | 0,229491 | -0,0143  | 0,086 | 0,11  | 1 |
| Trmt61a   | 0,229673 | -0,01287 | 0,088 | 0,112 | 1 |
| Hyal2     | 0,229742 | -0,00911 | 0,092 | 0,116 | 1 |
| Esco1     | 0,229874 | -0,01524 | 0,25  | 0,289 | 1 |
| 2700033N: | 0,23001  | -0,01465 | 0,05  | 0,068 | 1 |
| Nrcam     | 0,230076 | 0,042404 | 0,046 | 0,032 | 1 |
| Commd5    | 0,230106 | -0,01151 | 0,048 | 0,065 | 1 |
| Armc7     | 0,23028  | -0,01556 | 0,057 | 0,076 | 1 |
| Gm46404   | 0,230388 | -0,00754 | 0,04  | 0,057 | 1 |
| Mrnip     | 0,230695 | -0,01143 | 0,053 | 0,072 | 1 |
| Ttc7      | 0,230915 | 0,048146 | 0,123 | 0,101 | 1 |
| Ank       | 0,230941 | -0,04081 | 0,971 | 0,932 | 1 |

|           |          |          |       |       |   |
|-----------|----------|----------|-------|-------|---|
| Aldh3b1   | 0,230949 | -0,00496 | 0,301 | 0,348 | 1 |
| Ccdc6     | 0,23107  | 0,046459 | 0,218 | 0,192 | 1 |
| Gm48855   | 0,231231 | -0,01096 | 0,057 | 0,076 | 1 |
| Tgfb3     | 0,231379 | -0,01316 | 0,134 | 0,162 | 1 |
| Champ1    | 0,231737 | -0,01871 | 0,158 | 0,188 | 1 |
| Slc36a1   | 0,231804 | -0,00972 | 0,051 | 0,07  | 1 |
| Leng8     | 0,231949 | 0,001194 | 0,598 | 0,694 | 1 |
| Tmem241   | 0,231965 | 0,003656 | 0,037 | 0,053 | 1 |
| Trp53inp1 | 0,232118 | 0,103535 | 0,218 | 0,196 | 1 |
| Rfc5      | 0,23229  | -0,01384 | 0,061 | 0,08  | 1 |
| Pak4      | 0,232363 | -0,02139 | 0,112 | 0,137 | 1 |
| Erap1     | 0,232767 | -0,01338 | 0,057 | 0,076 | 1 |
| Casp12    | 0,232936 | 0,012465 | 0,007 | 0,002 | 1 |
| Smarca2   | 0,233076 | -0,03148 | 0,593 | 0,643 | 1 |
| Smarcd2   | 0,233172 | -0,02588 | 0,16  | 0,188 | 1 |
| Pabpc4    | 0,233225 | -0,01442 | 0,145 | 0,175 | 1 |
| Xpo4      | 0,23324  | -0,00661 | 0,266 | 0,31  | 1 |
| Tcaf2     | 0,233281 | 0,008842 | 0,007 | 0,002 | 1 |
| Ffar1     | 0,233281 | 0,008842 | 0,007 | 0,002 | 1 |
| Wee1      | 0,233281 | 0,008842 | 0,007 | 0,002 | 1 |
| Il17rd    | 0,233281 | 0,008842 | 0,007 | 0,002 | 1 |
| Tert      | 0,233281 | 0,008842 | 0,007 | 0,002 | 1 |
| Cndp1     | 0,233281 | 0,014271 | 0,007 | 0,002 | 1 |
| Slc7a5    | 0,233281 | 0,012465 | 0,007 | 0,002 | 1 |
| A230050P  | 0,233281 | 0,010655 | 0,007 | 0,002 | 1 |
| Icam1     | 0,233281 | 0,010655 | 0,007 | 0,002 | 1 |
| Ctns      | 0,23344  | 0,002207 | 0,128 | 0,158 | 1 |
| Rif1      | 0,23357  | 0,090996 | 0,677 | 0,694 | 1 |
| Srrm4     | 0,233626 | 0,016075 | 0,007 | 0,002 | 1 |
| 3632451O  | 0,233626 | 0,008842 | 0,007 | 0,002 | 1 |
| Gm26511   | 0,233626 | 0,008842 | 0,007 | 0,002 | 1 |
| Gm26698   | 0,233626 | 0,008842 | 0,007 | 0,002 | 1 |
| Dtl       | 0,233626 | 0,007025 | 0,007 | 0,002 | 1 |
| Nexn      | 0,233626 | 0,007025 | 0,007 | 0,002 | 1 |
| Raver2    | 0,233626 | 0,007025 | 0,007 | 0,002 | 1 |
| Gm17300   | 0,233626 | 0,007025 | 0,007 | 0,002 | 1 |
| Rsg1      | 0,233626 | 0,007025 | 0,007 | 0,002 | 1 |
| Olfr635   | 0,233626 | 0,007025 | 0,007 | 0,002 | 1 |
| Parva     | 0,233626 | 0,007025 | 0,007 | 0,002 | 1 |
| Slc6a15   | 0,233626 | 0,007025 | 0,007 | 0,002 | 1 |
| Gm34934   | 0,233626 | 0,007025 | 0,007 | 0,002 | 1 |
| Ets1      | 0,233626 | 0,007025 | 0,007 | 0,002 | 1 |
| Ticam2    | 0,233626 | 0,007025 | 0,007 | 0,002 | 1 |
| Tesmin    | 0,233626 | 0,007025 | 0,007 | 0,002 | 1 |
| Kif11     | 0,233626 | 0,007025 | 0,007 | 0,002 | 1 |
| Zfp706    | 0,233671 | -0,01445 | 0,994 | 0,994 | 1 |
| Gm28551   | 0,233972 | 0,005205 | 0,007 | 0,002 | 1 |
| Rbl1      | 0,233972 | 0,005205 | 0,007 | 0,002 | 1 |
| A530013C  | 0,233972 | 0,005205 | 0,007 | 0,002 | 1 |
| Samd10    | 0,233972 | 0,005205 | 0,007 | 0,002 | 1 |
| Nudt17    | 0,233972 | 0,005205 | 0,007 | 0,002 | 1 |
| Gpx7      | 0,233972 | 0,005205 | 0,007 | 0,002 | 1 |

|            |          |          |       |       |   |
|------------|----------|----------|-------|-------|---|
| Uchl1os    | 0,233972 | 0,005205 | 0,007 | 0,002 | 1 |
| Cldn15     | 0,233972 | 0,005205 | 0,007 | 0,002 | 1 |
| Gm45437    | 0,233972 | 0,005205 | 0,007 | 0,002 | 1 |
| 1700120K   | 0,233972 | 0,005205 | 0,007 | 0,002 | 1 |
| 59304220   | 0,233972 | 0,005205 | 0,007 | 0,002 | 1 |
| A930006LC  | 0,233972 | 0,005205 | 0,007 | 0,002 | 1 |
| Amigo3     | 0,233972 | 0,005205 | 0,007 | 0,002 | 1 |
| Gm6566     | 0,233972 | 0,005205 | 0,007 | 0,002 | 1 |
| Gm17058    | 0,233972 | 0,005205 | 0,007 | 0,002 | 1 |
| Ciita      | 0,233972 | 0,005205 | 0,007 | 0,002 | 1 |
| D430001F   | 0,233972 | 0,005205 | 0,007 | 0,002 | 1 |
| Kifc1      | 0,233972 | 0,005205 | 0,007 | 0,002 | 1 |
| Atxn1      | 0,23402  | 0,158082 | 0,328 | 0,325 | 1 |
| Rps18      | 0,234131 | 0,018681 | 0,971 | 0,973 | 1 |
| Asap2      | 0,234257 | -0,00901 | 0,389 | 0,447 | 1 |
| Nme7       | 0,234347 | -0,00948 | 0,05  | 0,068 | 1 |
| Arntl2     | 0,234468 | -0,00887 | 0,017 | 0,027 | 1 |
| Fastkd3    | 0,234628 | -0,01049 | 0,053 | 0,072 | 1 |
| Map4k3     | 0,234681 | -0,01652 | 0,171 | 0,203 | 1 |
| Stx5a      | 0,234786 | -0,00518 | 0,495 | 0,572 | 1 |
| Zfp746     | 0,234848 | 0,006105 | 0,187 | 0,226 | 1 |
| Paxx       | 0,234851 | 0,06183  | 0,602 | 0,608 | 1 |
| Bicra      | 0,234997 | -0,00648 | 0,163 | 0,196 | 1 |
| Klhl12     | 0,235064 | -0,00217 | 0,202 | 0,238 | 1 |
| Cpeb1      | 0,235095 | 0,079076 | 0,615 | 0,616 | 1 |
| AW549877   | 0,235116 | 0,067552 | 0,618 | 0,643 | 1 |
| Casc1      | 0,235144 | -0,00913 | 0,017 | 0,027 | 1 |
| Acaa2      | 0,235432 | -0,01072 | 0,051 | 0,07  | 1 |
| Chd1       | 0,235699 | 0,008889 | 0,345 | 0,403 | 1 |
| Vwa5a      | 0,235763 | -0,01032 | 0,292 | 0,331 | 1 |
| Cep170b    | 0,235842 | 0,051399 | 0,18  | 0,156 | 1 |
| Ncapd2     | 0,236    | -0,01113 | 0,064 | 0,084 | 1 |
| Fbxl16     | 0,236181 | 0,012517 | 0,039 | 0,025 | 1 |
| Akt2       | 0,23636  | 0,01335  | 0,336 | 0,397 | 1 |
| Kcmf1      | 0,236554 | 0,003859 | 0,415 | 0,479 | 1 |
| Rpl36a-ps1 | 0,236648 | -0,00707 | 0,017 | 0,027 | 1 |
| Apex2      | 0,236791 | -0,01013 | 0,072 | 0,093 | 1 |
| Prpf39     | 0,236952 | -0,00896 | 0,547 | 0,635 | 1 |
| Fbxo42     | 0,237114 | -0,01592 | 0,112 | 0,137 | 1 |
| Eif4ebp2   | 0,237224 | 0,007545 | 0,215 | 0,255 | 1 |
| Maml1      | 0,237408 | -0,01916 | 0,114 | 0,139 | 1 |
| Plpp2      | 0,237518 | -0,02609 | 0,631 | 0,675 | 1 |
| Zfp598     | 0,237742 | -0,0048  | 0,191 | 0,226 | 1 |
| Ldhd       | 0,238009 | -5,8E-05 | 0,108 | 0,135 | 1 |
| Golph3     | 0,238036 | 0,005787 | 0,367 | 0,426 | 1 |
| Ptpn4      | 0,238074 | 0,066901 | 0,231 | 0,209 | 1 |
| Gbf1       | 0,23833  | 0,006204 | 0,343 | 0,403 | 1 |
| Mapkbp1    | 0,238504 | -0,01037 | 0,075 | 0,097 | 1 |
| Bbs5       | 0,238758 | -0,00653 | 0,061 | 0,08  | 1 |
| A430105l1  | 0,238811 | -0,00842 | 0,084 | 0,108 | 1 |
| Fam168b    | 0,238859 | 0,071927 | 0,415 | 0,403 | 1 |
| Hoxc6      | 0,23894  | -0,01297 | 0,018 | 0,03  | 1 |



|          |          |          |       |       |   |
|----------|----------|----------|-------|-------|---|
| Zfp652   | 0,239155 | 0,01805  | 0,349 | 0,411 | 1 |
| Rnf187   | 0,239233 | -0,00974 | 0,897 | 0,892 | 1 |
| Rtl6     | 0,239448 | -0,01748 | 0,106 | 0,131 | 1 |
| Dclre1c  | 0,24007  | 0,051477 | 0,095 | 0,076 | 1 |
| Nudt4    | 0,240199 | -0,05097 | 0,655 | 0,686 | 1 |
| Gm45345  | 0,240223 | 0,035207 | 0,178 | 0,152 | 1 |
| Acadsb   | 0,240243 | -0,00275 | 0,369 | 0,424 | 1 |
| Mcm9     | 0,24044  | -0,00737 | 0,136 | 0,165 | 1 |
| Prcc     | 0,240445 | 0,001814 | 0,189 | 0,226 | 1 |
| Rps6ka2  | 0,240603 | -0,005   | 0,163 | 0,196 | 1 |
| Spindoc  | 0,240879 | -0,00369 | 0,088 | 0,112 | 1 |
| Tmem9b   | 0,240945 | -0,00329 | 0,831 | 0,869 | 1 |
| Gm26541  | 0,24106  | 0,016931 | 0,033 | 0,021 | 1 |
| Zcchc8   | 0,241164 | -0,00016 | 0,229 | 0,27  | 1 |
| Zfp13    | 0,241198 | -0,00679 | 0,051 | 0,07  | 1 |
| Gm4707   | 0,241552 | 0,020615 | 0,061 | 0,044 | 1 |
| Slc25a23 | 0,241659 | 0,002392 | 0,572 | 0,65  | 1 |
| Mau2     | 0,241783 | 0,085464 | 0,617 | 0,658 | 1 |
| Mindy4   | 0,241847 | -0,00531 | 0,051 | 0,07  | 1 |
| Eef2k    | 0,241918 | 0,047819 | 0,116 | 0,095 | 1 |
| Ahdcd1   | 0,241987 | -0,0121  | 0,139 | 0,169 | 1 |
| Etv5     | 0,24211  | -0,00434 | 0,046 | 0,063 | 1 |
| Trmt12   | 0,242129 | 0,00094  | 0,066 | 0,086 | 1 |
| Slc38a3  | 0,242324 | 0,052313 | 0,103 | 0,082 | 1 |
| Mfsd7a   | 0,242483 | 0,02294  | 0,053 | 0,038 | 1 |
| Klhl29   | 0,24257  | 0,015162 | 0,033 | 0,021 | 1 |
| Ap4m1    | 0,242623 | 0,01505  | 0,174 | 0,211 | 1 |
| Psme3    | 0,242674 | -0,00705 | 0,231 | 0,27  | 1 |
| Tufm     | 0,242789 | -0,00994 | 0,27  | 0,312 | 1 |
| Zfp628   | 0,242903 | 0,020316 | 0,061 | 0,044 | 1 |
| Sgcb     | 0,243042 | 0,000988 | 0,626 | 0,707 | 1 |
| Med25    | 0,243052 | -0,00926 | 0,36  | 0,411 | 1 |
| Zdhhc13  | 0,243069 | -0,00438 | 0,083 | 0,105 | 1 |
| Kdm3a    | 0,243393 | 0,108649 | 0,358 | 0,357 | 1 |
| Smarcal1 | 0,243881 | 0,060772 | 0,2   | 0,175 | 1 |
| Heatr3   | 0,244233 | 0,017229 | 0,49  | 0,568 | 1 |
| Mrgbp    | 0,244283 | 0,003746 | 0,196 | 0,234 | 1 |
| Al197445 | 0,244349 | -0,01955 | 0,02  | 0,032 | 1 |
| Nedd1    | 0,244418 | -0,0056  | 0,141 | 0,171 | 1 |
| Pttg1    | 0,24458  | -0,0112  | 0,297 | 0,338 | 1 |
| Usp10    | 0,244686 | 0,00991  | 0,257 | 0,306 | 1 |
| Card10   | 0,244982 | 0,04406  | 0,081 | 0,063 | 1 |
| Gm9493   | 0,245158 | -0,00733 | 0,018 | 0,03  | 1 |
| Cs       | 0,245367 | -0,00038 | 0,539 | 0,622 | 1 |
| Rpl23    | 0,245524 | -0,01119 | 0,998 | 0,998 | 1 |
| Wdr44    | 0,246145 | 0,005066 | 0,2   | 0,238 | 1 |
| A630089N | 0,246157 | 0,001339 | 0,018 | 0,03  | 1 |
| Mbtd1    | 0,246377 | 0,008842 | 0,358 | 0,418 | 1 |
| Epha10   | 0,246408 | -0,01346 | 0,02  | 0,032 | 1 |
| Dstn     | 0,246693 | 0,054427 | 1     | 0,987 | 1 |
| 4930455G | 0,246845 | 0,029044 | 0,04  | 0,027 | 1 |
| Whamm    | 0,24702  | 0,046321 | 0,167 | 0,143 | 1 |

|           |          |          |       |       |   |
|-----------|----------|----------|-------|-------|---|
| Lncpint   | 0,247063 | 0,052499 | 0,24  | 0,215 | 1 |
| Foxk1     | 0,24745  | -0,00477 | 0,185 | 0,219 | 1 |
| Dagla     | 0,247898 | 0,018748 | 0,017 | 0,008 | 1 |
| Hdac6     | 0,24798  | 0,046203 | 0,127 | 0,105 | 1 |
| Zfp287    | 0,248088 | -0,01509 | 0,196 | 0,23  | 1 |
| Kdelr2    | 0,248107 | -0,00653 | 0,402 | 0,468 | 1 |
| Csnk1a1   | 0,248245 | 0,05339  | 0,987 | 0,998 | 1 |
| Vangl2    | 0,248284 | 0,010624 | 0,167 | 0,2   | 1 |
| Dgat1     | 0,24829  | -0,00099 | 0,189 | 0,226 | 1 |
| Dact1     | 0,248749 | 0,017532 | 0,028 | 0,017 | 1 |
| Arcp2     | 0,248959 | 0,061854 | 0,837 | 0,859 | 1 |
| Xab2      | 0,249002 | 0,018354 | 0,394 | 0,464 | 1 |
| HnrnpII   | 0,249017 | 0,004272 | 0,325 | 0,376 | 1 |
| Tax1bp3   | 0,249082 | 0,000332 | 0,178 | 0,211 | 1 |
| Cpt1c     | 0,249093 | 0,007313 | 0,237 | 0,276 | 1 |
| Polr1c    | 0,249232 | -0,00992 | 0,228 | 0,266 | 1 |
| H2-Q10    | 0,249249 | 0,022001 | 0,017 | 0,008 | 1 |
| Ythdf2    | 0,249306 | -0,01692 | 0,378 | 0,428 | 1 |
| Wars      | 0,249384 | -0,00418 | 0,297 | 0,346 | 1 |
| Hsd3b7    | 0,249697 | 0,018748 | 0,017 | 0,008 | 1 |
| Polg2     | 0,249757 | 0,039012 | 0,139 | 0,116 | 1 |
| Crybb1    | 0,249918 | -0,00938 | 0,02  | 0,032 | 1 |
| Efcab12   | 0,250109 | 0,015757 | 0,028 | 0,017 | 1 |
| Ttc39b    | 0,250109 | 0,019303 | 0,028 | 0,017 | 1 |
| Abi1      | 0,250502 | 0,110204 | 0,417 | 0,426 | 1 |
| Gm12981   | 0,250599 | 0,011579 | 0,017 | 0,008 | 1 |
| 1700040D  | 0,250892 | -0,0115  | 0,007 | 0,015 | 1 |
| S100a1    | 0,25095  | 0,037971 | 0,963 | 0,916 | 1 |
| G0s2      | 0,251109 | 0,032748 | 0,112 | 0,137 | 1 |
| Tecpr1    | 0,251188 | -0,00436 | 0,358 | 0,422 | 1 |
| Smc5      | 0,251466 | 0,106758 | 0,387 | 0,39  | 1 |
| Gtf2ird1  | 0,251596 | -0,00926 | 0,116 | 0,141 | 1 |
| Fam35a    | 0,251597 | -0,02159 | 0,09  | 0,112 | 1 |
| Plekhm2   | 0,252132 | -0,00643 | 0,283 | 0,323 | 1 |
| Gm3550    | 0,252343 | -0,00758 | 0,02  | 0,032 | 1 |
| G730003C  | 0,25241  | 0,007975 | 0,017 | 0,008 | 1 |
| Orai2     | 0,25241  | 0,007975 | 0,017 | 0,008 | 1 |
| Tsc2      | 0,252517 | 0,074273 | 0,378 | 0,369 | 1 |
| Tm9sf1    | 0,252686 | 0,002504 | 0,081 | 0,103 | 1 |
| Tmem182   | 0,252701 | -0,00657 | 0,002 | 0,006 | 1 |
| Cacna1e   | 0,252701 | -0,00657 | 0,002 | 0,006 | 1 |
| Smim10l2a | 0,252701 | -0,00657 | 0,002 | 0,006 | 1 |
| Cth       | 0,252701 | -0,00657 | 0,002 | 0,006 | 1 |
| Tspan33   | 0,252701 | -0,00657 | 0,002 | 0,006 | 1 |
| 1700040LC | 0,252701 | -0,00657 | 0,002 | 0,006 | 1 |
| Gm44662   | 0,252701 | -0,00657 | 0,002 | 0,006 | 1 |
| Gm19325   | 0,252701 | -0,00657 | 0,002 | 0,006 | 1 |
| Ppm1e     | 0,252701 | -0,00657 | 0,002 | 0,006 | 1 |
| Pdzd2     | 0,252701 | -0,00657 | 0,002 | 0,006 | 1 |
| Dbx2      | 0,252701 | -0,00657 | 0,002 | 0,006 | 1 |
| P3h2      | 0,252701 | -0,00657 | 0,002 | 0,006 | 1 |
| C130060C  | 0,252701 | -0,00657 | 0,002 | 0,006 | 1 |

|           |          |          |       |       |   |
|-----------|----------|----------|-------|-------|---|
| Kcnc3     | 0,252701 | -0,00866 | 0,002 | 0,006 | 1 |
| Ifitm3    | 0,252701 | -0,00866 | 0,002 | 0,006 | 1 |
| Ptp4a3    | 0,252701 | -0,00866 | 0,002 | 0,006 | 1 |
| Hoxb3     | 0,252701 | -0,01075 | 0,002 | 0,006 | 1 |
| Isg20     | 0,252701 | -0,01698 | 0,002 | 0,006 | 1 |
| Phkg1     | 0,252824 | 0,00326  | 0,048 | 0,065 | 1 |
| Agbl2     | 0,252861 | -0,00735 | 0,007 | 0,015 | 1 |
| Mms22l    | 0,252861 | -0,00735 | 0,007 | 0,015 | 1 |
| Mansc1    | 0,252861 | -0,00735 | 0,007 | 0,015 | 1 |
| Pdf       | 0,252861 | -0,00735 | 0,007 | 0,015 | 1 |
| Drc3      | 0,252861 | -0,00735 | 0,007 | 0,015 | 1 |
| Adgrb1    | 0,25305  | 0,054278 | 0,231 | 0,207 | 1 |
| Pten      | 0,25307  | 0,058507 | 0,64  | 0,646 | 1 |
| 9930104Lc | 0,253087 | -0,00696 | 0,123 | 0,15  | 1 |
| Tmem185b  | 0,253097 | 0,005252 | 0,106 | 0,133 | 1 |
| Ndnf      | 0,253101 | 0,030573 | 0,055 | 0,04  | 1 |
| Speg      | 0,253109 | -0,00448 | 0,002 | 0,006 | 1 |
| Opn3      | 0,253109 | -0,00448 | 0,002 | 0,006 | 1 |
| Armc3     | 0,253109 | -0,00448 | 0,002 | 0,006 | 1 |
| Ntng2     | 0,253109 | -0,00448 | 0,002 | 0,006 | 1 |
| Olfr1310  | 0,253109 | -0,00448 | 0,002 | 0,006 | 1 |
| Gm14435   | 0,253109 | -0,00448 | 0,002 | 0,006 | 1 |
| Mageb16   | 0,253109 | -0,00448 | 0,002 | 0,006 | 1 |
| Bex4      | 0,253109 | -0,00448 | 0,002 | 0,006 | 1 |
| Actrt3    | 0,253109 | -0,00448 | 0,002 | 0,006 | 1 |
| Sis       | 0,253109 | -0,00448 | 0,002 | 0,006 | 1 |
| Zkscan16  | 0,253109 | -0,00448 | 0,002 | 0,006 | 1 |
| Gm13212   | 0,253109 | -0,00448 | 0,002 | 0,006 | 1 |
| Pik3cd    | 0,253109 | -0,00448 | 0,002 | 0,006 | 1 |
| Chd5      | 0,253109 | -0,00448 | 0,002 | 0,006 | 1 |
| Kctd8     | 0,253109 | -0,00448 | 0,002 | 0,006 | 1 |
| Gm35911   | 0,253109 | -0,00448 | 0,002 | 0,006 | 1 |
| Gm42918   | 0,253109 | -0,00448 | 0,002 | 0,006 | 1 |
| Dnah10    | 0,253109 | -0,00448 | 0,002 | 0,006 | 1 |
| Fbxo24    | 0,253109 | -0,00448 | 0,002 | 0,006 | 1 |
| Cpa5      | 0,253109 | -0,00448 | 0,002 | 0,006 | 1 |
| 1700026J1 | 0,253109 | -0,00448 | 0,002 | 0,006 | 1 |
| Map4k1    | 0,253109 | -0,00448 | 0,002 | 0,006 | 1 |
| Zfp977    | 0,253109 | -0,00448 | 0,002 | 0,006 | 1 |
| Rsf1os1   | 0,253109 | -0,00448 | 0,002 | 0,006 | 1 |
| Rsf1os2   | 0,253109 | -0,00448 | 0,002 | 0,006 | 1 |
| Chrdl2    | 0,253109 | -0,00448 | 0,002 | 0,006 | 1 |
| Gm20597   | 0,253109 | -0,00448 | 0,002 | 0,006 | 1 |
| Mypn      | 0,253109 | -0,00448 | 0,002 | 0,006 | 1 |
| Reep6     | 0,253109 | -0,00448 | 0,002 | 0,006 | 1 |
| Syt1      | 0,253109 | -0,00448 | 0,002 | 0,006 | 1 |
| C130073E2 | 0,253109 | -0,00448 | 0,002 | 0,006 | 1 |
| Ptger1    | 0,253109 | -0,00448 | 0,002 | 0,006 | 1 |
| Gm10248   | 0,253109 | -0,00448 | 0,002 | 0,006 | 1 |
| Gm48940   | 0,253109 | -0,00448 | 0,002 | 0,006 | 1 |
| Rnf17     | 0,253109 | -0,00448 | 0,002 | 0,006 | 1 |
| Npm2      | 0,253109 | -0,00448 | 0,002 | 0,006 | 1 |

|           |          |          |       |       |   |
|-----------|----------|----------|-------|-------|---|
| Gm38431   | 0,253109 | -0,00448 | 0,002 | 0,006 | 1 |
| Ttc36     | 0,253109 | -0,00448 | 0,002 | 0,006 | 1 |
| Gm47409   | 0,253109 | -0,00448 | 0,002 | 0,006 | 1 |
| Gm47112   | 0,253109 | -0,00448 | 0,002 | 0,006 | 1 |
| Pdlim4    | 0,253109 | -0,00448 | 0,002 | 0,006 | 1 |
| 1700001P  | 0,253109 | -0,00448 | 0,002 | 0,006 | 1 |
| Dhx58     | 0,253109 | -0,00448 | 0,002 | 0,006 | 1 |
| Zfp750    | 0,253109 | -0,00448 | 0,002 | 0,006 | 1 |
| Gm48116   | 0,253109 | -0,00448 | 0,002 | 0,006 | 1 |
| Acot12    | 0,253109 | -0,00448 | 0,002 | 0,006 | 1 |
| 2410018L1 | 0,253109 | -0,00448 | 0,002 | 0,006 | 1 |
| Six4      | 0,253109 | -0,00448 | 0,002 | 0,006 | 1 |
| Gm15943   | 0,253109 | -0,00448 | 0,002 | 0,006 | 1 |
| Pvalb     | 0,253109 | -0,00448 | 0,002 | 0,006 | 1 |
| Ppp1r1a   | 0,253109 | -0,00448 | 0,002 | 0,006 | 1 |
| Aifm3     | 0,253109 | -0,00448 | 0,002 | 0,006 | 1 |
| Zdhhc19   | 0,253109 | -0,00448 | 0,002 | 0,006 | 1 |
| AC110166. | 0,253109 | -0,00448 | 0,002 | 0,006 | 1 |
| Mrap      | 0,253109 | -0,00448 | 0,002 | 0,006 | 1 |
| Zfp947    | 0,253109 | -0,00448 | 0,002 | 0,006 | 1 |
| Def6      | 0,253109 | -0,00448 | 0,002 | 0,006 | 1 |
| Slc3a1    | 0,253109 | -0,00448 | 0,002 | 0,006 | 1 |
| Kif20a    | 0,253109 | -0,00448 | 0,002 | 0,006 | 1 |
| Pcdha5    | 0,253109 | -0,00448 | 0,002 | 0,006 | 1 |
| Ms4a4c    | 0,253109 | -0,00448 | 0,002 | 0,006 | 1 |
| Plce1     | 0,253109 | -0,00448 | 0,002 | 0,006 | 1 |
| Trafd1    | 0,253302 | -0,00791 | 0,2   | 0,236 | 1 |
| Dnaaf2    | 0,253355 | -0,01142 | 0,022 | 0,034 | 1 |
| Gm21887   | 0,253581 | 0,026711 | 0,079 | 0,061 | 1 |
| Cdk5r2    | 0,253608 | -0,0076  | 0,007 | 0,015 | 1 |
| Gm5577    | 0,253608 | -0,0076  | 0,007 | 0,015 | 1 |
| Malt1     | 0,253887 | 0,019849 | 0,145 | 0,177 | 1 |
| Mzb1      | 0,253929 | -0,00474 | 0,002 | 0,006 | 1 |
| Hoxb3os   | 0,253929 | -0,00527 | 0,002 | 0,006 | 1 |
| Tnfaip1   | 0,254046 | -0,0094  | 0,191 | 0,224 | 1 |
| Lman2     | 0,254177 | 0,08581  | 0,55  | 0,582 | 1 |
| Dlgap1    | 0,25434  | 0,006453 | 0,002 | 0,006 | 1 |
| Gm7697    | 0,25434  | 0,001003 | 0,002 | 0,006 | 1 |
| Gm37850   | 0,25434  | -0,00082 | 0,002 | 0,006 | 1 |
| Gm15537   | 0,25434  | -0,00082 | 0,002 | 0,006 | 1 |
| 0610039K: | 0,25434  | -0,00265 | 0,002 | 0,006 | 1 |
| Flicr     | 0,25434  | -0,00265 | 0,002 | 0,006 | 1 |
| Cd52      | 0,25434  | -0,00265 | 0,002 | 0,006 | 1 |
| Pon3      | 0,25434  | -0,00265 | 0,002 | 0,006 | 1 |
| Fcgrt     | 0,25434  | -0,00265 | 0,002 | 0,006 | 1 |
| Hectd2    | 0,25434  | -0,00265 | 0,002 | 0,006 | 1 |
| Ppfia4    | 0,25434  | -0,00291 | 0,002 | 0,006 | 1 |
| Zfpm1     | 0,254582 | 0,087789 | 0,446 | 0,456 | 1 |
| Rpusd2    | 0,2546   | -0,00371 | 0,007 | 0,015 | 1 |
| Morn5     | 0,2546   | -0,00553 | 0,007 | 0,015 | 1 |
| Zscan25   | 0,2546   | -0,00553 | 0,007 | 0,015 | 1 |
| Tshb      | 0,254814 | 0,014572 | 0,022 | 0,013 | 1 |

|           |          |          |       |       |   |
|-----------|----------|----------|-------|-------|---|
| 2010109A: | 0,254814 | 0,014572 | 0,022 | 0,013 | 1 |
| Serhl     | 0,254814 | 0,016356 | 0,022 | 0,013 | 1 |
| 3010003L2 | 0,254947 | -0,00656 | 0,022 | 0,034 | 1 |
| Rbpjl     | 0,255002 | 0,037352 | 0,114 | 0,093 | 1 |
| Pcx       | 0,255141 | 0,073488 | 0,439 | 0,432 | 1 |
| Pou2f1    | 0,255202 | 0,095569 | 0,347 | 0,34  | 1 |
| Alms1     | 0,255225 | 0,048643 | 0,073 | 0,057 | 1 |
| Spata5    | 0,25543  | -0,01605 | 0,097 | 0,12  | 1 |
| Cdkn1b    | 0,255514 | 0,069391 | 0,688 | 0,686 | 1 |
| Adgre5    | 0,255599 | -0,00397 | 0,007 | 0,015 | 1 |
| Mfsd10    | 0,255606 | -0,01031 | 0,132 | 0,16  | 1 |
| Ptcra     | 0,25562  | 0,008627 | 0,017 | 0,008 | 1 |
| Cpsf7     | 0,255733 | 0,019335 | 0,396 | 0,464 | 1 |
| Etl4      | 0,255983 | 0,012785 | 0,022 | 0,013 | 1 |
| Tgfb1     | 0,255983 | 0,018137 | 0,022 | 0,013 | 1 |
| Osbpl2    | 0,25623  | 0,000883 | 0,314 | 0,363 | 1 |
| Rps27rt   | 0,256325 | -0,0129  | 0,237 | 0,272 | 1 |
| Eaf2      | 0,256539 | -0,01061 | 0,022 | 0,034 | 1 |
| Hbegf     | 0,256661 | 0,0494   | 0,095 | 0,076 | 1 |
| Plekhf2   | 0,256816 | 0,036377 | 0,064 | 0,049 | 1 |
| Gys1      | 0,257098 | -0,00397 | 0,007 | 0,015 | 1 |
| Tmem65    | 0,257381 | 0,007404 | 0,475 | 0,549 | 1 |
| Rsad2     | 0,257956 | 0,029222 | 0,022 | 0,013 | 1 |
| Grik5     | 0,25817  | -0,02827 | 0,273 | 0,31  | 1 |
| Gm10762   | 0,258413 | -0,00783 | 0,022 | 0,034 | 1 |
| Gm16702   | 0,259059 | -0,00809 | 0,022 | 0,034 | 1 |
| Dmrtc1a   | 0,25925  | -0,01822 | 0,028 | 0,04  | 1 |
| BC025920  | 0,259335 | 0,020615 | 0,055 | 0,04  | 1 |
| Sat1      | 0,259406 | 0,134247 | 0,644 | 0,643 | 1 |
| Snrpf     | 0,259564 | -0,00858 | 0,75  | 0,8   | 1 |
| Zfp3      | 0,259675 | -0,01061 | 0,024 | 0,036 | 1 |
| Tmx3      | 0,259835 | -0,00775 | 0,624 | 0,686 | 1 |
| Oxsr1     | 0,259877 | 0,081209 | 0,229 | 0,209 | 1 |
| Mpp7      | 0,260035 | -0,01086 | 0,022 | 0,034 | 1 |
| Ppm1a     | 0,260192 | -0,00712 | 0,754 | 0,821 | 1 |
| Bivm      | 0,260413 | -0,01553 | 0,086 | 0,108 | 1 |
| Cmtm6     | 0,2607   | 0,008401 | 0,251 | 0,295 | 1 |
| Carm1     | 0,26077  | -0,0094  | 0,198 | 0,232 | 1 |
| Mocs3     | 0,261072 | -0,01998 | 0,123 | 0,148 | 1 |
| Csrp2     | 0,261156 | 0,022334 | 0,055 | 0,04  | 1 |
| Dph2      | 0,261357 | -0,01242 | 0,09  | 0,112 | 1 |
| Cenpc1    | 0,261431 | 0,016728 | 0,275 | 0,325 | 1 |
| Puf60     | 0,26147  | 0,052749 | 0,895 | 0,867 | 1 |
| B4galt3   | 0,261538 | 0,077486 | 0,301 | 0,285 | 1 |
| Ctdspl2   | 0,261572 | 0,007225 | 0,297 | 0,348 | 1 |
| Sobp      | 0,261661 | 0,016426 | 0,127 | 0,103 | 1 |
| Nhlrc4    | 0,261678 | -0,003   | 0,024 | 0,036 | 1 |
| Gba2      | 0,261852 | -0,01756 | 0,075 | 0,095 | 1 |
| Osbpl5    | 0,262091 | -0,01863 | 0,125 | 0,15  | 1 |
| Hmbox1    | 0,262158 | 0,006024 | 0,394 | 0,449 | 1 |
| Asphd1    | 0,26217  | 0,000847 | 0,077 | 0,099 | 1 |
| Arpp19    | 0,26223  | -0,00886 | 0,945 | 0,935 | 1 |

|          |          |          |       |       |   |
|----------|----------|----------|-------|-------|---|
| Ralb     | 0,262349 | -0,00899 | 0,183 | 0,215 | 1 |
| Iqsec2   | 0,262587 | -0,00478 | 0,022 | 0,034 | 1 |
| Mapk3    | 0,26267  | -0,01875 | 0,983 | 0,975 | 1 |
| Atp9a    | 0,262718 | -0,03614 | 0,901 | 0,901 | 1 |
| Polr3g   | 0,262964 | -0,00558 | 0,099 | 0,122 | 1 |
| Ubt2     | 0,262985 | -0,01374 | 0,077 | 0,097 | 1 |
| Pyroxd1  | 0,263148 | -0,02827 | 0,207 | 0,236 | 1 |
| Gm43598  | 0,263253 | 0,026842 | 0,035 | 0,023 | 1 |
| Mylip    | 0,263571 | -0,0143  | 0,084 | 0,105 | 1 |
| Snrpb2   | 0,263593 | 0,025663 | 0,431 | 0,517 | 1 |
| Cenpw    | 0,26361  | -0,01239 | 0,026 | 0,038 | 1 |
| Ier5l    | 0,263861 | 0,064428 | 0,084 | 0,068 | 1 |
| Foxo1    | 0,264033 | 0,072891 | 0,369 | 0,354 | 1 |
| Parg     | 0,264103 | 0,021092 | 0,305 | 0,352 | 1 |
| Slc5a5   | 0,264225 | -0,01287 | 0,026 | 0,038 | 1 |
| Traf3    | 0,264409 | -0,0169  | 0,075 | 0,095 | 1 |
| Plekho2  | 0,264705 | 0,06223  | 0,187 | 0,167 | 1 |
| Ube2z    | 0,264789 | 0,007564 | 0,297 | 0,344 | 1 |
| Mex3b    | 0,264928 | 0,103712 | 0,206 | 0,19  | 1 |
| Wdr45b   | 0,265253 | 0,019267 | 0,55  | 0,633 | 1 |
| Col16a1  | 0,265314 | 0,064141 | 0,283 | 0,257 | 1 |
| Gtpbp3   | 0,265457 | -0,00988 | 0,134 | 0,16  | 1 |
| Knstrn   | 0,265722 | -0,01037 | 0,026 | 0,038 | 1 |
| Fndc3b   | 0,265979 | 0,030833 | 0,141 | 0,118 | 1 |
| Fcho1    | 0,266304 | 0,015438 | 0,055 | 0,04  | 1 |
| Prune2   | 0,266368 | 0,09681  | 0,288 | 0,272 | 1 |
| Mafg     | 0,266623 | 0,095923 | 0,572 | 0,599 | 1 |
| Tgfb2    | 0,266769 | 0,044425 | 0,05  | 0,036 | 1 |
| Ncoa2    | 0,267197 | 0,081538 | 0,55  | 0,563 | 1 |
| Rps4x    | 0,267543 | 0,002631 | 0,976 | 0,989 | 1 |
| Srsf11   | 0,268468 | 0,042843 | 0,886 | 0,888 | 1 |
| Armcx1   | 0,268814 | -0,02098 | 0,299 | 0,333 | 1 |
| Gtpbp4   | 0,268938 | 0,038103 | 0,448 | 0,523 | 1 |
| Wdr7     | 0,268983 | -0,00871 | 0,262 | 0,302 | 1 |
| Ttc27    | 0,269236 | -0,01197 | 0,09  | 0,112 | 1 |
| Pea15a   | 0,269563 | 0,001762 | 0,983 | 0,981 | 1 |
| Miga1    | 0,269568 | 0,035855 | 0,358 | 0,432 | 1 |
| Abhd13   | 0,26969  | -0,01526 | 0,13  | 0,156 | 1 |
| Setd1b   | 0,269869 | 0,100995 | 0,389 | 0,388 | 1 |
| Acads    | 0,269925 | 0,032272 | 0,156 | 0,133 | 1 |
| Pds5a    | 0,270016 | 0,093625 | 0,47  | 0,477 | 1 |
| Abcd1    | 0,270048 | 0,050397 | 0,196 | 0,175 | 1 |
| Msto1    | 0,270451 | -0,00421 | 0,116 | 0,141 | 1 |
| Tspan2   | 0,27052  | -0,01673 | 0,989 | 0,992 | 1 |
| Spats1   | 0,270607 | -0,00656 | 0,026 | 0,038 | 1 |
| Uggt2    | 0,270706 | 0,027061 | 0,117 | 0,146 | 1 |
| S100a13  | 0,270831 | 0,062977 | 0,947 | 0,922 | 1 |
| Sfxn2    | 0,27095  | 0,046017 | 0,158 | 0,135 | 1 |
| Mad2l1bp | 0,271098 | -0,00748 | 0,083 | 0,103 | 1 |
| Ttc8     | 0,271154 | -0,01491 | 0,185 | 0,215 | 1 |
| Mmab     | 0,271341 | -0,00907 | 0,103 | 0,127 | 1 |
| Gusb     | 0,271737 | -0,01064 | 0,257 | 0,295 | 1 |

|           |          |          |       |       |   |
|-----------|----------|----------|-------|-------|---|
| Tshz1     | 0,272048 | 0,076899 | 0,534 | 0,536 | 1 |
| Pip4k2a   | 0,272059 | 0,060768 | 0,985 | 0,994 | 1 |
| Kdm1b     | 0,272095 | 0,032075 | 0,136 | 0,114 | 1 |
| Nme3      | 0,272188 | -0,01498 | 0,072 | 0,091 | 1 |
| Rce1      | 0,272431 | -0,00643 | 0,268 | 0,308 | 1 |
| Tnpo3     | 0,272936 | 0,091844 | 0,481 | 0,494 | 1 |
| Slc39a1   | 0,27312  | 0,046085 | 0,578 | 0,578 | 1 |
| Rasa1     | 0,273222 | -0,0045  | 0,352 | 0,399 | 1 |
| Shbg      | 0,273235 | -0,01199 | 0,009 | 0,017 | 1 |
| Amot      | 0,273711 | -0,00968 | 0,009 | 0,017 | 1 |
| Gm26799   | 0,273711 | -0,00968 | 0,009 | 0,017 | 1 |
| Itga2b    | 0,273711 | -0,00968 | 0,009 | 0,017 | 1 |
| Zscan2    | 0,273944 | -0,01335 | 0,033 | 0,046 | 1 |
| Kdm4c     | 0,274051 | -0,00482 | 0,202 | 0,234 | 1 |
| 4933427D  | 0,274071 | -0,00013 | 0,112 | 0,137 | 1 |
| Inafm1    | 0,274117 | 0,039533 | 0,11  | 0,091 | 1 |
| Dusp18    | 0,274138 | 0,032062 | 0,059 | 0,044 | 1 |
| Ints13    | 0,274342 | 0,006107 | 0,259 | 0,304 | 1 |
| Odc1      | 0,274491 | 0,035709 | 0,283 | 0,259 | 1 |
| Sugt1     | 0,27477  | -0,02896 | 0,651 | 0,703 | 1 |
| 1700034P  | 0,274913 | -0,0076  | 0,009 | 0,017 | 1 |
| Ankrd23   | 0,274913 | -0,0076  | 0,009 | 0,017 | 1 |
| Catspere2 | 0,274913 | -0,0076  | 0,009 | 0,017 | 1 |
| Gm14426   | 0,274913 | -0,0076  | 0,009 | 0,017 | 1 |
| Gm21269   | 0,274913 | -0,0076  | 0,009 | 0,017 | 1 |
| Gm6712    | 0,274913 | -0,0076  | 0,009 | 0,017 | 1 |
| Tubgcp2   | 0,274978 | 0,005964 | 0,189 | 0,222 | 1 |
| Ovgp1     | 0,275067 | -0,00908 | 0,029 | 0,042 | 1 |
| Snrpc     | 0,275246 | -0,01082 | 0,606 | 0,679 | 1 |
| Fbxo45    | 0,27529  | 0,012829 | 0,292 | 0,34  | 1 |
| Tenm3     | 0,275445 | 0,027006 | 0,042 | 0,03  | 1 |
| Kcnma1    | 0,275453 | 0,058165 | 0,206 | 0,179 | 1 |
| 4930488L2 | 0,275856 | -0,02006 | 0,053 | 0,07  | 1 |
| Al464131  | 0,275921 | -0,01383 | 0,037 | 0,051 | 1 |
| Zfp963    | 0,276188 | 0,002302 | 0,026 | 0,038 | 1 |
| 4932435O  | 0,276851 | -0,00579 | 0,009 | 0,017 | 1 |
| Mok       | 0,276851 | -0,00579 | 0,009 | 0,017 | 1 |
| Gm36899   | 0,276851 | -0,00579 | 0,009 | 0,017 | 1 |
| Add1      | 0,277026 | 0,008427 | 0,916 | 0,882 | 1 |
| Cep76     | 0,277099 | -0,01546 | 0,05  | 0,065 | 1 |
| Racgap1   | 0,277134 | 0,002034 | 0,026 | 0,038 | 1 |
| Gm2415    | 0,27719  | -0,00723 | 0,088 | 0,11  | 1 |
| Gadd45a   | 0,277395 | -0,02799 | 0,325 | 0,363 | 1 |
| Zbtb34    | 0,277433 | 0,026548 | 0,066 | 0,051 | 1 |
| Cenpm     | 0,277583 | -0,00605 | 0,009 | 0,017 | 1 |
| 2210008FC | 0,277826 | -0,00424 | 0,009 | 0,017 | 1 |
| Zfp759    | 0,277912 | -0,015   | 0,046 | 0,061 | 1 |
| Pik3c2b   | 0,277961 | 0,00439  | 0,747 | 0,793 | 1 |
| Zfp867    | 0,277975 | -0,01158 | 0,035 | 0,049 | 1 |
| Ydjc      | 0,278021 | -0,01453 | 0,042 | 0,057 | 1 |
| Zfp971    | 0,278113 | -0,00806 | 0,035 | 0,049 | 1 |
| Khsrp     | 0,278668 | 0,097016 | 0,45  | 0,464 | 1 |

|           |          |          |       |       |   |
|-----------|----------|----------|-------|-------|---|
| Parp16    | 0,278798 | -0,00216 | 0,009 | 0,017 | 1 |
| Zfp937    | 0,279149 | -0,01465 | 0,055 | 0,072 | 1 |
| Pola2     | 0,279191 | -0,02037 | 0,108 | 0,131 | 1 |
| Sec22c    | 0,279247 | -0,01635 | 0,117 | 0,141 | 1 |
| Cdk16     | 0,279279 | 0,004981 | 0,512 | 0,586 | 1 |
| Taf4b     | 0,279299 | 0,020458 | 0,029 | 0,019 | 1 |
| Scaf11    | 0,279497 | 0,045437 | 0,895 | 0,89  | 1 |
| Gtpbbp1   | 0,279534 | -0,00419 | 0,101 | 0,124 | 1 |
| Eef1d     | 0,279706 | 0,042743 | 0,945 | 0,945 | 1 |
| Traf5     | 0,279777 | -0,00063 | 0,009 | 0,017 | 1 |
| D730045B1 | 0,279777 | -0,00243 | 0,009 | 0,017 | 1 |
| Sfxn1     | 0,27982  | 0,018999 | 0,029 | 0,019 | 1 |
| Tmem28    | 0,28039  | -0,00078 | 0,105 | 0,129 | 1 |
| Pkd1      | 0,28053  | 0,071658 | 0,33  | 0,319 | 1 |
| Tbc1d9b   | 0,280547 | 0,0657   | 0,367 | 0,346 | 1 |
| B130006D1 | 0,280738 | -0,01183 | 0,035 | 0,049 | 1 |
| Aldh6a1   | 0,280741 | -0,01516 | 0,659 | 0,698 | 1 |
| Gm45447   | 0,280753 | -0,00036 | 0,009 | 0,017 | 1 |
| Becn1     | 0,280814 | -0,00221 | 0,385 | 0,443 | 1 |
| Wdr73     | 0,281358 | 0,002529 | 0,105 | 0,129 | 1 |
| Cenpe     | 0,281498 | -0,00078 | 0,028 | 0,04  | 1 |
| Ago2      | 0,28184  | 0,005897 | 0,248 | 0,289 | 1 |
| Rps14     | 0,282074 | 0,049906 | 0,998 | 0,996 | 1 |
| Man1b1    | 0,282204 | -0,00466 | 0,354 | 0,403 | 1 |
| Tspyl1    | 0,282314 | 0,002346 | 0,58  | 0,671 | 1 |
| Asxl2     | 0,282397 | 0,06724  | 0,536 | 0,54  | 1 |
| AC146911. | 0,282963 | -0,00654 | 0,051 | 0,068 | 1 |
| Xcr1      | 0,283012 | 0,013685 | 0,029 | 0,019 | 1 |
| Gm16152   | 0,283012 | 0,017231 | 0,029 | 0,019 | 1 |
| Atcay     | 0,283457 | -0,00485 | 0,07  | 0,089 | 1 |
| Rpl36     | 0,283507 | -0,00361 | 0,996 | 0,998 | 1 |
| Prkcs     | 0,283528 | 0,063996 | 0,683 | 0,698 | 1 |
| Zadh2     | 0,283642 | -0,00984 | 0,222 | 0,253 | 1 |
| Trim44    | 0,283683 | 0,063707 | 0,633 | 0,639 | 1 |
| Hsd3b2    | 0,283747 | 0,025099 | 0,037 | 0,025 | 1 |
| Npr1      | 0,283942 | 0,001766 | 0,028 | 0,04  | 1 |
| Htatsf1   | 0,284058 | 0,003834 | 0,45  | 0,523 | 1 |
| Reps1     | 0,284234 | -0,01769 | 0,264 | 0,3   | 1 |
| Rnf216    | 0,284294 | 0,014053 | 0,453 | 0,515 | 1 |
| Nmt2      | 0,284394 | 0,078738 | 0,272 | 0,253 | 1 |
| Sulf1     | 0,284478 | -0,00211 | 0     | 0,002 | 1 |
| Dnah7a    | 0,284478 | -0,00211 | 0     | 0,002 | 1 |
| Casp8     | 0,284478 | -0,00211 | 0     | 0,002 | 1 |
| Ihh       | 0,284478 | -0,00211 | 0     | 0,002 | 1 |
| Sp110     | 0,284478 | -0,00211 | 0     | 0,002 | 1 |
| 2810459M  | 0,284478 | -0,00211 | 0     | 0,002 | 1 |
| Inpp5d    | 0,284478 | -0,00211 | 0     | 0,002 | 1 |
| Tnfrsf11a | 0,284478 | -0,00211 | 0     | 0,002 | 1 |
| Tmem37    | 0,284478 | -0,00211 | 0     | 0,002 | 1 |
| Celrr     | 0,284478 | -0,00211 | 0     | 0,002 | 1 |
| Map3k19   | 0,284478 | -0,00211 | 0     | 0,002 | 1 |
| Ctse      | 0,284478 | -0,00211 | 0     | 0,002 | 1 |



|           |          |          |   |       |   |
|-----------|----------|----------|---|-------|---|
| Fam163a   | 0,284478 | -0,00211 | 0 | 0,002 | 1 |
| Rxrg      | 0,284478 | -0,00211 | 0 | 0,002 | 1 |
| F11r      | 0,284478 | -0,00211 | 0 | 0,002 | 1 |
| Gm38251   | 0,284478 | -0,00211 | 0 | 0,002 | 1 |
| Kcnh1     | 0,284478 | -0,00211 | 0 | 0,002 | 1 |
| Traf3ip3  | 0,284478 | -0,00211 | 0 | 0,002 | 1 |
| Sapcd2    | 0,284478 | -0,00211 | 0 | 0,002 | 1 |
| Ptges     | 0,284478 | -0,00211 | 0 | 0,002 | 1 |
| Ass1      | 0,284478 | -0,00211 | 0 | 0,002 | 1 |
| C130021I2 | 0,284478 | -0,00211 | 0 | 0,002 | 1 |
| Traf1     | 0,284478 | -0,00211 | 0 | 0,002 | 1 |
| Ptgs1     | 0,284478 | -0,00211 | 0 | 0,002 | 1 |
| Sp5       | 0,284478 | -0,00211 | 0 | 0,002 | 1 |
| Gm26558   | 0,284478 | -0,00211 | 0 | 0,002 | 1 |
| Ttn       | 0,284478 | -0,00211 | 0 | 0,002 | 1 |
| Calcr1    | 0,284478 | -0,00211 | 0 | 0,002 | 1 |
| Pamr1     | 0,284478 | -0,00211 | 0 | 0,002 | 1 |
| Rhov      | 0,284478 | -0,00211 | 0 | 0,002 | 1 |
| Dusp2     | 0,284478 | -0,00211 | 0 | 0,002 | 1 |
| Gm14005   | 0,284478 | -0,00211 | 0 | 0,002 | 1 |
| Pdyn      | 0,284478 | -0,00211 | 0 | 0,002 | 1 |
| Adam33    | 0,284478 | -0,00211 | 0 | 0,002 | 1 |
| Siglec1   | 0,284478 | -0,00211 | 0 | 0,002 | 1 |
| Syndig1   | 0,284478 | -0,00211 | 0 | 0,002 | 1 |
| Nrsn2     | 0,284478 | -0,00211 | 0 | 0,002 | 1 |
| Necab3    | 0,284478 | -0,00211 | 0 | 0,002 | 1 |
| 2310005A  | 0,284478 | -0,00211 | 0 | 0,002 | 1 |
| Mmp24     | 0,284478 | -0,00211 | 0 | 0,002 | 1 |
| Kcns1     | 0,284478 | -0,00211 | 0 | 0,002 | 1 |
| Cdh22     | 0,284478 | -0,00211 | 0 | 0,002 | 1 |
| Dok5      | 0,284478 | -0,00211 | 0 | 0,002 | 1 |
| Chrna4    | 0,284478 | -0,00211 | 0 | 0,002 | 1 |
| Gpr82     | 0,284478 | -0,00211 | 0 | 0,002 | 1 |
| Chst7     | 0,284478 | -0,00211 | 0 | 0,002 | 1 |
| Slc9a7    | 0,284478 | -0,00211 | 0 | 0,002 | 1 |
| Dcaf12I1  | 0,284478 | -0,00211 | 0 | 0,002 | 1 |
| Igsf1     | 0,284478 | -0,00211 | 0 | 0,002 | 1 |
| Gabre     | 0,284478 | -0,00211 | 0 | 0,002 | 1 |
| Bgn       | 0,284478 | -0,00211 | 0 | 0,002 | 1 |
| Itm2a     | 0,284478 | -0,00211 | 0 | 0,002 | 1 |
| Pou3f4    | 0,284478 | -0,00211 | 0 | 0,002 | 1 |
| Rps6ka6   | 0,284478 | -0,00211 | 0 | 0,002 | 1 |
| Tceal6    | 0,284478 | -0,00211 | 0 | 0,002 | 1 |
| Kctd12b   | 0,284478 | -0,00211 | 0 | 0,002 | 1 |
| Rnf138rt1 | 0,284478 | -0,00211 | 0 | 0,002 | 1 |
| Tlr7      | 0,284478 | -0,00211 | 0 | 0,002 | 1 |
| Arhgap6   | 0,284478 | -0,00211 | 0 | 0,002 | 1 |
| Gm37350   | 0,284478 | -0,00211 | 0 | 0,002 | 1 |
| Fabp4     | 0,284478 | -0,00211 | 0 | 0,002 | 1 |
| Mir124-2h | 0,284478 | -0,00211 | 0 | 0,002 | 1 |
| A830092H  | 0,284478 | -0,00211 | 0 | 0,002 | 1 |
| P2ry1     | 0,284478 | -0,00211 | 0 | 0,002 | 1 |

|           |          |          |   |       |   |
|-----------|----------|----------|---|-------|---|
| 9330121JC | 0,284478 | -0,00211 | 0 | 0,002 | 1 |
| Cd1d1     | 0,284478 | -0,00211 | 0 | 0,002 | 1 |
| Cd5l      | 0,284478 | -0,00211 | 0 | 0,002 | 1 |
| Iqgap3    | 0,284478 | -0,00211 | 0 | 0,002 | 1 |
| Sema4a    | 0,284478 | -0,00211 | 0 | 0,002 | 1 |
| Efna3     | 0,284478 | -0,00211 | 0 | 0,002 | 1 |
| Tnfaip8l2 | 0,284478 | -0,00211 | 0 | 0,002 | 1 |
| Hmgcs2    | 0,284478 | -0,00211 | 0 | 0,002 | 1 |
| Spag17    | 0,284478 | -0,00211 | 0 | 0,002 | 1 |
| Kcnc4     | 0,284478 | -0,00211 | 0 | 0,002 | 1 |
| 5330417C: | 0,284478 | -0,00211 | 0 | 0,002 | 1 |
| Plppr4    | 0,284478 | -0,00211 | 0 | 0,002 | 1 |
| Ndst3     | 0,284478 | -0,00211 | 0 | 0,002 | 1 |
| Bdh2      | 0,284478 | -0,00211 | 0 | 0,002 | 1 |
| Adgrl2    | 0,284478 | -0,00211 | 0 | 0,002 | 1 |
| Car8      | 0,284478 | -0,00211 | 0 | 0,002 | 1 |
| Gm11837   | 0,284478 | -0,00211 | 0 | 0,002 | 1 |
| Bach2os   | 0,284478 | -0,00211 | 0 | 0,002 | 1 |
| Pdzk1ip1  | 0,284478 | -0,00211 | 0 | 0,002 | 1 |
| Kif2c     | 0,284478 | -0,00211 | 0 | 0,002 | 1 |
| Ccdc30    | 0,284478 | -0,00211 | 0 | 0,002 | 1 |
| Dlgap3    | 0,284478 | -0,00211 | 0 | 0,002 | 1 |
| Fgr       | 0,284478 | -0,00211 | 0 | 0,002 | 1 |
| Cnr2      | 0,284478 | -0,00211 | 0 | 0,002 | 1 |
| Mfap2     | 0,284478 | -0,00211 | 0 | 0,002 | 1 |
| Gm13052   | 0,284478 | -0,00211 | 0 | 0,002 | 1 |
| Lrrc38    | 0,284478 | -0,00211 | 0 | 0,002 | 1 |
| Zfp981    | 0,284478 | -0,00211 | 0 | 0,002 | 1 |
| Disp3     | 0,284478 | -0,00211 | 0 | 0,002 | 1 |
| Ube4bos1  | 0,284478 | -0,00211 | 0 | 0,002 | 1 |
| Steap2    | 0,284478 | -0,00211 | 0 | 0,002 | 1 |
| Otof      | 0,284478 | -0,00211 | 0 | 0,002 | 1 |
| Nat8l     | 0,284478 | -0,00211 | 0 | 0,002 | 1 |
| 9630001P: | 0,284478 | -0,00211 | 0 | 0,002 | 1 |
| Ppargc1a  | 0,284478 | -0,00211 | 0 | 0,002 | 1 |
| Sod3      | 0,284478 | -0,00211 | 0 | 0,002 | 1 |
| 8030423F: | 0,284478 | -0,00211 | 0 | 0,002 | 1 |
| Antxr2    | 0,284478 | -0,00211 | 0 | 0,002 | 1 |
| Prkg2     | 0,284478 | -0,00211 | 0 | 0,002 | 1 |
| Galnt9    | 0,284478 | -0,00211 | 0 | 0,002 | 1 |
| Miat      | 0,284478 | -0,00211 | 0 | 0,002 | 1 |
| Sdsl      | 0,284478 | -0,00211 | 0 | 0,002 | 1 |
| Morn3     | 0,284478 | -0,00211 | 0 | 0,002 | 1 |
| 5930412G: | 0,284478 | -0,00211 | 0 | 0,002 | 1 |
| Vgf       | 0,284478 | -0,00211 | 0 | 0,002 | 1 |
| Flt1      | 0,284478 | -0,00211 | 0 | 0,002 | 1 |
| Medag     | 0,284478 | -0,00211 | 0 | 0,002 | 1 |
| Mdfic     | 0,284478 | -0,00211 | 0 | 0,002 | 1 |
| Hoxa10    | 0,284478 | -0,00211 | 0 | 0,002 | 1 |
| Gm16499   | 0,284478 | -0,00211 | 0 | 0,002 | 1 |
| Prr15     | 0,284478 | -0,00211 | 0 | 0,002 | 1 |
| Tnip3     | 0,284478 | -0,00211 | 0 | 0,002 | 1 |

|           |          |          |   |       |   |
|-----------|----------|----------|---|-------|---|
| Lrrtm1    | 0,284478 | -0,00211 | 0 | 0,002 | 1 |
| 1700003E1 | 0,284478 | -0,00211 | 0 | 0,002 | 1 |
| Wnt7a     | 0,284478 | -0,00211 | 0 | 0,002 | 1 |
| Fam19a1   | 0,284478 | -0,00211 | 0 | 0,002 | 1 |
| Fam19a4   | 0,284478 | -0,00211 | 0 | 0,002 | 1 |
| Hrh1      | 0,284478 | -0,00211 | 0 | 0,002 | 1 |
| Pianp     | 0,284478 | -0,00211 | 0 | 0,002 | 1 |
| 9330179D  | 0,284478 | -0,00211 | 0 | 0,002 | 1 |
| Prmt8     | 0,284478 | -0,00211 | 0 | 0,002 | 1 |
| Arhgdib   | 0,284478 | -0,00211 | 0 | 0,002 | 1 |
| Rerg      | 0,284478 | -0,00211 | 0 | 0,002 | 1 |
| Lmo3      | 0,284478 | -0,00211 | 0 | 0,002 | 1 |
| Lrmp      | 0,284478 | -0,00211 | 0 | 0,002 | 1 |
| Gm17216   | 0,284478 | -0,00211 | 0 | 0,002 | 1 |
| Pira2     | 0,284478 | -0,00211 | 0 | 0,002 | 1 |
| Lair1     | 0,284478 | -0,00211 | 0 | 0,002 | 1 |
| Syt5      | 0,284478 | -0,00211 | 0 | 0,002 | 1 |
| Shisa7    | 0,284478 | -0,00211 | 0 | 0,002 | 1 |
| Bcam      | 0,284478 | -0,00211 | 0 | 0,002 | 1 |
| Sptbn4    | 0,284478 | -0,00211 | 0 | 0,002 | 1 |
| Hcst      | 0,284478 | -0,00211 | 0 | 0,002 | 1 |
| Dmkn      | 0,284478 | -0,00211 | 0 | 0,002 | 1 |
| BC046251  | 0,284478 | -0,00211 | 0 | 0,002 | 1 |
| A730056A  | 0,284478 | -0,00211 | 0 | 0,002 | 1 |
| Acan      | 0,284478 | -0,00211 | 0 | 0,002 | 1 |
| Gm35040   | 0,284478 | -0,00211 | 0 | 0,002 | 1 |
| Cfap161   | 0,284478 | -0,00211 | 0 | 0,002 | 1 |
| A230065N  | 0,284478 | -0,00211 | 0 | 0,002 | 1 |
| Me3       | 0,284478 | -0,00211 | 0 | 0,002 | 1 |
| P4ha3     | 0,284478 | -0,00211 | 0 | 0,002 | 1 |
| Gm4070    | 0,284478 | -0,00211 | 0 | 0,002 | 1 |
| Calca     | 0,284478 | -0,00211 | 0 | 0,002 | 1 |
| Dnah3     | 0,284478 | -0,00211 | 0 | 0,002 | 1 |
| Hs3st4    | 0,284478 | -0,00211 | 0 | 0,002 | 1 |
| Gsg1l     | 0,284478 | -0,00211 | 0 | 0,002 | 1 |
| Doc2a     | 0,284478 | -0,00211 | 0 | 0,002 | 1 |
| Chst15    | 0,284478 | -0,00211 | 0 | 0,002 | 1 |
| Fank1     | 0,284478 | -0,00211 | 0 | 0,002 | 1 |
| Sprn      | 0,284478 | -0,00211 | 0 | 0,002 | 1 |
| Cyp2e1    | 0,284478 | -0,00211 | 0 | 0,002 | 1 |
| Esr1      | 0,284478 | -0,00211 | 0 | 0,002 | 1 |
| E030030I0 | 0,284478 | -0,00211 | 0 | 0,002 | 1 |
| Tpd52l1   | 0,284478 | -0,00211 | 0 | 0,002 | 1 |
| Hs3st5    | 0,284478 | -0,00211 | 0 | 0,002 | 1 |
| Pcbd1     | 0,284478 | -0,00211 | 0 | 0,002 | 1 |
| Gstt1     | 0,284478 | -0,00211 | 0 | 0,002 | 1 |
| Gm867     | 0,284478 | -0,00211 | 0 | 0,002 | 1 |
| Grin3b    | 0,284478 | -0,00211 | 0 | 0,002 | 1 |
| Plk5      | 0,284478 | -0,00211 | 0 | 0,002 | 1 |
| Smim24    | 0,284478 | -0,00211 | 0 | 0,002 | 1 |
| Ntn4      | 0,284478 | -0,00211 | 0 | 0,002 | 1 |
| Plxnc1    | 0,284478 | -0,00211 | 0 | 0,002 | 1 |

|          |          |          |   |       |   |
|----------|----------|----------|---|-------|---|
| Ptpr     | 0,284478 | -0,00211 | 0 | 0,002 | 1 |
| Grip1    | 0,284478 | -0,00211 | 0 | 0,002 | 1 |
| Fam155a  | 0,284478 | -0,00211 | 0 | 0,002 | 1 |
| Myo16    | 0,284478 | -0,00211 | 0 | 0,002 | 1 |
| Angpt2   | 0,284478 | -0,00211 | 0 | 0,002 | 1 |
| Adam5    | 0,284478 | -0,00211 | 0 | 0,002 | 1 |
| Gm45411  | 0,284478 | -0,00211 | 0 | 0,002 | 1 |
| Gm26632  | 0,284478 | -0,00211 | 0 | 0,002 | 1 |
| Hapln4   | 0,284478 | -0,00211 | 0 | 0,002 | 1 |
| Mast1    | 0,284478 | -0,00211 | 0 | 0,002 | 1 |
| Irx3os   | 0,284478 | -0,00211 | 0 | 0,002 | 1 |
| Bean1    | 0,284478 | -0,00211 | 0 | 0,002 | 1 |
| Slc9a5   | 0,284478 | -0,00211 | 0 | 0,002 | 1 |
| Osgin1   | 0,284478 | -0,00211 | 0 | 0,002 | 1 |
| Necab2   | 0,284478 | -0,00211 | 0 | 0,002 | 1 |
| Cbfa2t3  | 0,284478 | -0,00211 | 0 | 0,002 | 1 |
| Spire2   | 0,284478 | -0,00211 | 0 | 0,002 | 1 |
| Dbn1     | 0,284478 | -0,00211 | 0 | 0,002 | 1 |
| Fam89a   | 0,284478 | -0,00211 | 0 | 0,002 | 1 |
| Nrp1     | 0,284478 | -0,00211 | 0 | 0,002 | 1 |
| D830030K | 0,284478 | -0,00211 | 0 | 0,002 | 1 |
| Wdfy4    | 0,284478 | -0,00211 | 0 | 0,002 | 1 |
| Gprin2   | 0,284478 | -0,00211 | 0 | 0,002 | 1 |
| Slc35f4  | 0,284478 | -0,00211 | 0 | 0,002 | 1 |
| 4930579G | 0,284478 | -0,00211 | 0 | 0,002 | 1 |
| Ebf2     | 0,284478 | -0,00211 | 0 | 0,002 | 1 |
| Gm4675   | 0,284478 | -0,00211 | 0 | 0,002 | 1 |
| Pgr      | 0,284478 | -0,00211 | 0 | 0,002 | 1 |
| Scn2b    | 0,284478 | -0,00211 | 0 | 0,002 | 1 |
| Layn     | 0,284478 | -0,00211 | 0 | 0,002 | 1 |
| A1593442 | 0,284478 | -0,00211 | 0 | 0,002 | 1 |
| Celf6    | 0,284478 | -0,00211 | 0 | 0,002 | 1 |
| Skor1    | 0,284478 | -0,00211 | 0 | 0,002 | 1 |
| Gm47270  | 0,284478 | -0,00211 | 0 | 0,002 | 1 |
| Rbpms2   | 0,284478 | -0,00211 | 0 | 0,002 | 1 |
| Cgn1     | 0,284478 | -0,00211 | 0 | 0,002 | 1 |
| Ddx43    | 0,284478 | -0,00211 | 0 | 0,002 | 1 |
| Plscr1   | 0,284478 | -0,00211 | 0 | 0,002 | 1 |
| Plscr4   | 0,284478 | -0,00211 | 0 | 0,002 | 1 |
| Sema3f   | 0,284478 | -0,00211 | 0 | 0,002 | 1 |
| Gm26614  | 0,284478 | -0,00211 | 0 | 0,002 | 1 |
| Osm      | 0,284478 | -0,00211 | 0 | 0,002 | 1 |
| Igfbp3   | 0,284478 | -0,00211 | 0 | 0,002 | 1 |
| Ikzf1    | 0,284478 | -0,00211 | 0 | 0,002 | 1 |
| Grb10    | 0,284478 | -0,00211 | 0 | 0,002 | 1 |
| Bcl11a   | 0,284478 | -0,00211 | 0 | 0,002 | 1 |
| Fbll1    | 0,284478 | -0,00211 | 0 | 0,002 | 1 |
| C1qtnf2  | 0,284478 | -0,00211 | 0 | 0,002 | 1 |
| Slc22a4  | 0,284478 | -0,00211 | 0 | 0,002 | 1 |
| P4ha2    | 0,284478 | -0,00211 | 0 | 0,002 | 1 |
| Shisa6   | 0,284478 | -0,00211 | 0 | 0,002 | 1 |
| Kcnab3   | 0,284478 | -0,00211 | 0 | 0,002 | 1 |

|           |          |          |   |       |   |
|-----------|----------|----------|---|-------|---|
| Tekt1     | 0,284478 | -0,00211 | 0 | 0,002 | 1 |
| Itgae     | 0,284478 | -0,00211 | 0 | 0,002 | 1 |
| Adap2     | 0,284478 | -0,00211 | 0 | 0,002 | 1 |
| Ccl9      | 0,284478 | -0,00211 | 0 | 0,002 | 1 |
| Abi3      | 0,284478 | -0,00211 | 0 | 0,002 | 1 |
| Skap1     | 0,284478 | -0,00211 | 0 | 0,002 | 1 |
| Tbkbp1    | 0,284478 | -0,00211 | 0 | 0,002 | 1 |
| Tns4      | 0,284478 | -0,00211 | 0 | 0,002 | 1 |
| Ptges3l   | 0,284478 | -0,00211 | 0 | 0,002 | 1 |
| 2810433Dl | 0,284478 | -0,00211 | 0 | 0,002 | 1 |
| Cd300lb   | 0,284478 | -0,00211 | 0 | 0,002 | 1 |
| Gng4      | 0,284478 | -0,00211 | 0 | 0,002 | 1 |
| Hist1h4j  | 0,284478 | -0,00211 | 0 | 0,002 | 1 |
| Hist1h1b  | 0,284478 | -0,00211 | 0 | 0,002 | 1 |
| Gcnt2     | 0,284478 | -0,00211 | 0 | 0,002 | 1 |
| Trpc7     | 0,284478 | -0,00211 | 0 | 0,002 | 1 |
| Dapk1     | 0,284478 | -0,00211 | 0 | 0,002 | 1 |
| 1700001L1 | 0,284478 | -0,00211 | 0 | 0,002 | 1 |
| Pcsk1     | 0,284478 | -0,00211 | 0 | 0,002 | 1 |
| Hapln1    | 0,284478 | -0,00211 | 0 | 0,002 | 1 |
| Atp6ap1l  | 0,284478 | -0,00211 | 0 | 0,002 | 1 |
| Bhmt      | 0,284478 | -0,00211 | 0 | 0,002 | 1 |
| AW495222  | 0,284478 | -0,00211 | 0 | 0,002 | 1 |
| F2r12     | 0,284478 | -0,00211 | 0 | 0,002 | 1 |
| Gm5086    | 0,284478 | -0,00211 | 0 | 0,002 | 1 |
| Gm807     | 0,284478 | -0,00211 | 0 | 0,002 | 1 |
| Cd180     | 0,284478 | -0,00211 | 0 | 0,002 | 1 |
| Rnf180    | 0,284478 | -0,00211 | 0 | 0,002 | 1 |
| Gm47997   | 0,284478 | -0,00211 | 0 | 0,002 | 1 |
| Gm33680   | 0,284478 | -0,00211 | 0 | 0,002 | 1 |
| Lrfn5     | 0,284478 | -0,00211 | 0 | 0,002 | 1 |
| Gpr135    | 0,284478 | -0,00211 | 0 | 0,002 | 1 |
| Prkch     | 0,284478 | -0,00211 | 0 | 0,002 | 1 |
| Dbpht2    | 0,284478 | -0,00211 | 0 | 0,002 | 1 |
| Rab15     | 0,284478 | -0,00211 | 0 | 0,002 | 1 |
| Syndig1l  | 0,284478 | -0,00211 | 0 | 0,002 | 1 |
| Flrt2     | 0,284478 | -0,00211 | 0 | 0,002 | 1 |
| Gpr65     | 0,284478 | -0,00211 | 0 | 0,002 | 1 |
| Kcnk10    | 0,284478 | -0,00211 | 0 | 0,002 | 1 |
| Pld4      | 0,284478 | -0,00211 | 0 | 0,002 | 1 |
| Fam105a   | 0,284478 | -0,00211 | 0 | 0,002 | 1 |
| Rgs22     | 0,284478 | -0,00211 | 0 | 0,002 | 1 |
| Gm30159   | 0,284478 | -0,00211 | 0 | 0,002 | 1 |
| Ly6e      | 0,284478 | -0,00211 | 0 | 0,002 | 1 |
| Gm48952   | 0,284478 | -0,00211 | 0 | 0,002 | 1 |
| Csf2rb2   | 0,284478 | -0,00211 | 0 | 0,002 | 1 |
| Tex33     | 0,284478 | -0,00211 | 0 | 0,002 | 1 |
| Mfng      | 0,284478 | -0,00211 | 0 | 0,002 | 1 |
| Apobec3   | 0,284478 | -0,00211 | 0 | 0,002 | 1 |
| Cacna1i   | 0,284478 | -0,00211 | 0 | 0,002 | 1 |
| Panx2     | 0,284478 | -0,00211 | 0 | 0,002 | 1 |
| AC101921. | 0,284478 | -0,00211 | 0 | 0,002 | 1 |

|           |          |          |       |       |   |
|-----------|----------|----------|-------|-------|---|
| Nell2     | 0,284478 | -0,00211 | 0     | 0,002 | 1 |
| Itgb7     | 0,284478 | -0,00211 | 0     | 0,002 | 1 |
| Rmi2      | 0,284478 | -0,00211 | 0     | 0,002 | 1 |
| Pkp2      | 0,284478 | -0,00211 | 0     | 0,002 | 1 |
| Nrros     | 0,284478 | -0,00211 | 0     | 0,002 | 1 |
| Hcls1     | 0,284478 | -0,00211 | 0     | 0,002 | 1 |
| Ccdc80    | 0,284478 | -0,00211 | 0     | 0,002 | 1 |
| Chodl     | 0,284478 | -0,00211 | 0     | 0,002 | 1 |
| Gm1604a   | 0,284478 | -0,00211 | 0     | 0,002 | 1 |
| Baiap3    | 0,284478 | -0,00211 | 0     | 0,002 | 1 |
| Fgd2      | 0,284478 | -0,00211 | 0     | 0,002 | 1 |
| Olfr63    | 0,284478 | -0,00211 | 0     | 0,002 | 1 |
| H2-Aa     | 0,284478 | -0,00211 | 0     | 0,002 | 1 |
| H2-Eb1    | 0,284478 | -0,00211 | 0     | 0,002 | 1 |
| Lrfr2     | 0,284478 | -0,00211 | 0     | 0,002 | 1 |
| Tnfaip8l1 | 0,284478 | -0,00211 | 0     | 0,002 | 1 |
| Xdh       | 0,284478 | -0,00211 | 0     | 0,002 | 1 |
| Kcnk12    | 0,284478 | -0,00211 | 0     | 0,002 | 1 |
| Gm15328   | 0,284478 | -0,00211 | 0     | 0,002 | 1 |
| Pcdhac2   | 0,284478 | -0,00211 | 0     | 0,002 | 1 |
| Rab27b    | 0,284478 | -0,00211 | 0     | 0,002 | 1 |
| Gal       | 0,284478 | -0,00211 | 0     | 0,002 | 1 |
| Lrp5      | 0,284478 | -0,00211 | 0     | 0,002 | 1 |
| Npas4     | 0,284478 | -0,00211 | 0     | 0,002 | 1 |
| Cdca5     | 0,284478 | -0,00211 | 0     | 0,002 | 1 |
| Fam111a   | 0,284478 | -0,00211 | 0     | 0,002 | 1 |
| Olfr1459  | 0,284478 | -0,00211 | 0     | 0,002 | 1 |
| Trpm6     | 0,284478 | -0,00211 | 0     | 0,002 | 1 |
| Prkg1     | 0,284478 | -0,00211 | 0     | 0,002 | 1 |
| Rbp4      | 0,284478 | -0,00211 | 0     | 0,002 | 1 |
| Pnlip     | 0,284478 | -0,00211 | 0     | 0,002 | 1 |
| Ptgs2     | 0,284478 | -0,00421 | 0     | 0,002 | 1 |
| Zcchc12   | 0,284478 | -0,00421 | 0     | 0,002 | 1 |
| Rai2      | 0,284478 | -0,00421 | 0     | 0,002 | 1 |
| Gabrg1    | 0,284478 | -0,00421 | 0     | 0,002 | 1 |
| Smim17    | 0,284478 | -0,00421 | 0     | 0,002 | 1 |
| Lilr4b    | 0,284478 | -0,00421 | 0     | 0,002 | 1 |
| Tsnaxip1  | 0,284478 | -0,00421 | 0     | 0,002 | 1 |
| 50334260l | 0,284478 | -0,00421 | 0     | 0,002 | 1 |
| Vwc2      | 0,284478 | -0,00421 | 0     | 0,002 | 1 |
| Rap1gap2  | 0,284478 | -0,00421 | 0     | 0,002 | 1 |
| Rad51ap2  | 0,284478 | -0,00421 | 0     | 0,002 | 1 |
| Cdh18     | 0,284478 | -0,00421 | 0     | 0,002 | 1 |
| Gda       | 0,284478 | -0,00421 | 0     | 0,002 | 1 |
| Prrg4     | 0,284478 | -0,00631 | 0     | 0,002 | 1 |
| Atg9b     | 0,284478 | -0,00631 | 0     | 0,002 | 1 |
| Mir670hg  | 0,284478 | -0,0084  | 0     | 0,002 | 1 |
| Lmo2      | 0,284478 | -0,0084  | 0     | 0,002 | 1 |
| Pde7b     | 0,284478 | -0,0084  | 0     | 0,002 | 1 |
| Lamb1     | 0,284478 | -0,0084  | 0     | 0,002 | 1 |
| Sfrp1     | 0,284487 | -0,00754 | 0,037 | 0,051 | 1 |
| Cdon      | 0,284639 | 0,034391 | 0,112 | 0,093 | 1 |

|          |          |          |       |       |   |
|----------|----------|----------|-------|-------|---|
| Gm14325  | 0,285116 | -0,00454 | 0,037 | 0,051 | 1 |
| Gmppa    | 0,285183 | -0,01906 | 0,207 | 0,238 | 1 |
| Dtwd1    | 0,285232 | -0,00393 | 0,084 | 0,105 | 1 |
| Zfp280b  | 0,285263 | -0,01143 | 0,057 | 0,074 | 1 |
| Dhx40    | 0,285395 | 0,084353 | 0,435 | 0,435 | 1 |
| Zhx2     | 0,285432 | -0,00846 | 0,158 | 0,186 | 1 |
| Nfyc     | 0,286152 | 0,062288 | 0,259 | 0,241 | 1 |
| Abcd4    | 0,286373 | 0,004855 | 0,266 | 0,308 | 1 |
| Tut1     | 0,286453 | -0,00506 | 0,048 | 0,063 | 1 |
| Gm26518  | 0,286534 | 0,08991  | 0,235 | 0,217 | 1 |
| Ptdss1   | 0,286743 | 0,066453 | 0,462 | 0,462 | 1 |
| Acbd4    | 0,28689  | -0,00359 | 0,053 | 0,07  | 1 |
| Pde4a    | 0,286972 | -0,00385 | 0,222 | 0,255 | 1 |
| Cntrob   | 0,287407 | -0,0088  | 0,04  | 0,055 | 1 |
| Apeh     | 0,287469 | -0,00533 | 0,075 | 0,095 | 1 |
| Rsph3a   | 0,287587 | -0,00904 | 0,044 | 0,059 | 1 |
| Smarca1  | 0,287593 | 0,034203 | 0,037 | 0,025 | 1 |
| Jakmip3  | 0,287597 | 0,015648 | 0,523 | 0,601 | 1 |
| Cpne3    | 0,287651 | 0,067968 | 0,334 | 0,319 | 1 |
| Zfp91    | 0,287944 | -0,01864 | 0,84  | 0,876 | 1 |
| Cep68    | 0,287988 | -0,014   | 0,147 | 0,173 | 1 |
| Fam189b  | 0,288568 | 0,004816 | 0,066 | 0,084 | 1 |
| Gm2a     | 0,288727 | 0,070919 | 0,6   | 0,595 | 1 |
| Cab39    | 0,288933 | 0,011534 | 0,609 | 0,684 | 1 |
| Tmem43   | 0,28894  | -0,01267 | 0,202 | 0,234 | 1 |
| Ubap2    | 0,28917  | 0,024635 | 0,301 | 0,354 | 1 |
| Fam117b  | 0,289802 | 0,094457 | 0,356 | 0,352 | 1 |
| Hspa5    | 0,289874 | -0,03237 | 0,93  | 0,941 | 1 |
| Ezh2     | 0,290044 | 0,060164 | 0,213 | 0,192 | 1 |
| Mmp14    | 0,290049 | 0,025865 | 0,013 | 0,006 | 1 |
| Fancb    | 0,290593 | -0,00993 | 0,011 | 0,019 | 1 |
| Txndc2   | 0,290617 | 0,01547  | 0,013 | 0,006 | 1 |
| Insl6    | 0,290617 | 0,013673 | 0,013 | 0,006 | 1 |
| Ifit3b   | 0,290617 | 0,017264 | 0,013 | 0,006 | 1 |
| 2610035D | 0,290911 | 0,03947  | 0,218 | 0,262 | 1 |
| Ssc4d    | 0,291473 | 0,01007  | 0,013 | 0,006 | 1 |
| Azin2    | 0,291473 | 0,011873 | 0,013 | 0,006 | 1 |
| Gm9903   | 0,291473 | 0,011873 | 0,013 | 0,006 | 1 |
| Itgb3    | 0,291545 | -0,00263 | 0,055 | 0,072 | 1 |
| Ints5.1  | 0,291644 | 0,000756 | 0,097 | 0,12  | 1 |
| 1700066B | 0,291755 | 0,016056 | 0,024 | 0,015 | 1 |
| Tardbp   | 0,291832 | 0,054223 | 0,611 | 0,622 | 1 |
| Gm15420  | 0,291993 | -0,00786 | 0,011 | 0,019 | 1 |
| Bend4    | 0,292329 | 0,01007  | 0,013 | 0,006 | 1 |
| Pilrb2   | 0,292329 | 0,01007  | 0,013 | 0,006 | 1 |
| Grm8     | 0,292329 | 0,008263 | 0,013 | 0,006 | 1 |
| Stac3    | 0,292329 | 0,008263 | 0,013 | 0,006 | 1 |
| Gm47428  | 0,292329 | 0,008263 | 0,013 | 0,006 | 1 |
| Rai14    | 0,292329 | 0,008263 | 0,013 | 0,006 | 1 |
| Slc35e3  | 0,2924   | 0,045051 | 0,217 | 0,194 | 1 |
| Arid4a   | 0,292482 | 0,002776 | 0,4   | 0,464 | 1 |
| Matn4    | 0,292518 | 0,010446 | 0,503 | 0,574 | 1 |

|           |          |          |       |       |   |
|-----------|----------|----------|-------|-------|---|
| Otud5     | 0,292587 | 0,06911  | 0,33  | 0,319 | 1 |
| Zfp821    | 0,292611 | -0,01914 | 0,156 | 0,184 | 1 |
| Snx29     | 0,293005 | 0,005252 | 0,218 | 0,255 | 1 |
| Epc2      | 0,293109 | 0,002412 | 0,327 | 0,373 | 1 |
| Klhdc8b   | 0,293177 | -0,01068 | 0,011 | 0,019 | 1 |
| Eogt      | 0,293177 | 0,016056 | 0,024 | 0,015 | 1 |
| Actr3     | 0,293179 | -0,00868 | 0,728 | 0,77  | 1 |
| 9430002A: | 0,293187 | 0,006453 | 0,013 | 0,006 | 1 |
| Runx2os1  | 0,293192 | 0,01517  | 0,013 | 0,006 | 1 |
| Gm45605   | 0,293217 | -0,00531 | 0,05  | 0,065 | 1 |
| Rnf19b    | 0,293283 | 0,047047 | 0,149 | 0,129 | 1 |
| Zscan12   | 0,293332 | -0,00317 | 0,072 | 0,091 | 1 |
| Rapgef3   | 0,294087 | 0,027207 | 0,182 | 0,158 | 1 |
| Slc25a48  | 0,29411  | -0,00424 | 0,011 | 0,019 | 1 |
| Hgs       | 0,29411  | -0,00605 | 0,011 | 0,019 | 1 |
| Ctbp2     | 0,29434  | 0,006169 | 0,013 | 0,006 | 1 |
| Dock6     | 0,294603 | 0,012491 | 0,024 | 0,015 | 1 |
| Aff2      | 0,294603 | 0,014275 | 0,024 | 0,015 | 1 |
| Cenpt     | 0,294882 | -0,00024 | 0,064 | 0,082 | 1 |
| Arid3b    | 0,294898 | -0,00605 | 0,07  | 0,089 | 1 |
| Mob1a     | 0,29515  | 0,066426 | 0,266 | 0,249 | 1 |
| Itfg2     | 0,295194 | 0,016023 | 0,31  | 0,363 | 1 |
| Fbxw8     | 0,295514 | -0,00676 | 0,338 | 0,38  | 1 |
| Rps6ka4   | 0,295579 | 0,014572 | 0,207 | 0,245 | 1 |
| Ccdc89    | 0,29558  | -0,00456 | 0,048 | 0,063 | 1 |
| Supt3     | 0,29562  | 0,058995 | 0,319 | 0,304 | 1 |
| Cep97     | 0,295623 | 0,068735 | 0,615 | 0,61  | 1 |
| Snn       | 0,295664 | 0,083249 | 0,299 | 0,289 | 1 |
| Mtmr9     | 0,295856 | -8,1E-06 | 0,31  | 0,357 | 1 |
| Oplah     | 0,295917 | -0,00238 | 0,059 | 0,076 | 1 |
| Gm10273   | 0,296034 | 0,010704 | 0,024 | 0,015 | 1 |
| Cbx2      | 0,296034 | 0,010704 | 0,024 | 0,015 | 1 |
| Zfp456    | 0,296034 | 0,010704 | 0,024 | 0,015 | 1 |
| Gm48420   | 0,296034 | 0,010704 | 0,024 | 0,015 | 1 |
| Arfgap2   | 0,296217 | 0,052222 | 0,694 | 0,696 | 1 |
| 17000080I | 0,296237 | -0,00424 | 0,011 | 0,019 | 1 |
| Kazald1   | 0,296237 | -0,00424 | 0,011 | 0,019 | 1 |
| Sec24c    | 0,296479 | 0,059863 | 0,336 | 0,321 | 1 |
| Zfp263    | 0,296658 | 0,000257 | 0,185 | 0,215 | 1 |
| Zfat      | 0,296988 | 0,021517 | 0,051 | 0,038 | 1 |
| Gm48682   | 0,297247 | 0,014572 | 0,037 | 0,025 | 1 |
| Gmcl1     | 0,297747 | 0,017842 | 0,306 | 0,359 | 1 |
| Gpr153    | 0,297903 | 0,018137 | 0,018 | 0,011 | 1 |
| Gpr35     | 0,298137 | 0,023775 | 0,018 | 0,011 | 1 |
| Mfap3l    | 0,298183 | 0,03187  | 0,103 | 0,084 | 1 |
| Pak3      | 0,298235 | -0,00568 | 0,266 | 0,297 | 1 |
| Faap20    | 0,298426 | 0,001833 | 0,13  | 0,156 | 1 |
| Gdf11     | 0,298808 | 0,016902 | 0,044 | 0,032 | 1 |
| Gpsm1     | 0,298879 | 0,001817 | 0,294 | 0,338 | 1 |
| Ap1ar     | 0,298886 | 0,030519 | 0,248 | 0,3   | 1 |
| Qsox2     | 0,299279 | 0,004166 | 0,233 | 0,27  | 1 |
| Gm15879   | 0,299325 | 0,01308  | 0,018 | 0,011 | 1 |



|           |          |          |       |       |   |
|-----------|----------|----------|-------|-------|---|
| Phf21b    | 0,299325 | 0,018442 | 0,018 | 0,011 | 1 |
| Poll      | 0,299392 | -0,01531 | 0,086 | 0,105 | 1 |
| Isca1     | 0,299611 | 0,009355 | 0,218 | 0,255 | 1 |
| Bcl2l2    | 0,299793 | -0,0084  | 0,319 | 0,361 | 1 |
| Snap91    | 0,30013  | -0,00993 | 0,112 | 0,135 | 1 |
| Syt9      | 0,300433 | -0,00975 | 0,097 | 0,118 | 1 |
| Jak1      | 0,300489 | -0,01    | 0,461 | 0,517 | 1 |
| Gm48529   | 0,300515 | 0,011286 | 0,018 | 0,011 | 1 |
| Adarb1    | 0,300515 | 0,01487  | 0,018 | 0,011 | 1 |
| Zfp462    | 0,300573 | 0,01176  | 0,402 | 0,462 | 1 |
| Ddx27     | 0,300611 | -0,00143 | 0,284 | 0,323 | 1 |
| Dctn1     | 0,300656 | -0,02462 | 0,82  | 0,827 | 1 |
| Rbm19     | 0,300734 | -0,01356 | 0,128 | 0,152 | 1 |
| Fmn2      | 0,300917 | 0,008493 | 0,044 | 0,032 | 1 |
| Coq8b     | 0,301133 | 0,071568 | 0,228 | 0,209 | 1 |
| Art3      | 0,301665 | -0,11525 | 0,149 | 0,169 | 1 |
| Tle2      | 0,301754 | 0,057375 | 0,226 | 0,207 | 1 |
| Xrn2      | 0,301923 | 0,029825 | 0,484 | 0,551 | 1 |
| Nfkbil1   | 0,302198 | -0,02507 | 0,165 | 0,19  | 1 |
| Gnb1      | 0,302639 | 0,039178 | 0,972 | 0,975 | 1 |
| Per2      | 0,302671 | 0,014572 | 0,018 | 0,011 | 1 |
| Ptpn18    | 0,302911 | 0,009201 | 0,018 | 0,011 | 1 |
| Ogfr      | 0,302973 | 0,011329 | 0,347 | 0,405 | 1 |
| Miip      | 0,303002 | 0,029242 | 0,114 | 0,095 | 1 |
| Usp5      | 0,30313  | 0,011839 | 0,558 | 0,635 | 1 |
| Wac       | 0,303186 | 0,08517  | 0,635 | 0,662 | 1 |
| Zbtb7b    | 0,303308 | 0,057895 | 0,325 | 0,312 | 1 |
| Lrguk     | 0,304111 | 0,007404 | 0,018 | 0,011 | 1 |
| Kif13a    | 0,304112 | -0,0139  | 0,655 | 0,696 | 1 |
| Atr       | 0,304374 | -0,00663 | 0,239 | 0,276 | 1 |
| Zfp941    | 0,30448  | -0,01043 | 0,013 | 0,021 | 1 |
| Pde10a    | 0,304536 | 0,025726 | 0,031 | 0,021 | 1 |
| Dmxl2     | 0,304566 | 0,07181  | 0,239 | 0,222 | 1 |
| Cuedc2    | 0,304615 | -0,01201 | 0,8   | 0,857 | 1 |
| Il17rb    | 0,304855 | -0,01386 | 0,086 | 0,105 | 1 |
| Ndel1     | 0,305109 | 0,003251 | 0,378 | 0,43  | 1 |
| Trub1     | 0,305228 | 0,00341  | 0,189 | 0,222 | 1 |
| Lnpc      | 0,305342 | 0,001411 | 0,492 | 0,565 | 1 |
| Prex2     | 0,305377 | -0,00812 | 0,013 | 0,021 | 1 |
| Dtx4      | 0,305426 | -0,01778 | 0,081 | 0,099 | 1 |
| Hif1an    | 0,305522 | -0,00196 | 0,226 | 0,262 | 1 |
| Rpl27     | 0,30566  | -0,00284 | 0,969 | 0,958 | 1 |
| AC149090. | 0,305728 | 0,081824 | 0,776 | 0,768 | 1 |
| Nipbl     | 0,305774 | 0,077315 | 0,782 | 0,77  | 1 |
| Pak2      | 0,305862 | 0,039103 | 0,923 | 0,924 | 1 |
| E2f2      | 0,306293 | -0,00656 | 0,013 | 0,021 | 1 |
| Ddost     | 0,306314 | -0,00898 | 0,723 | 0,764 | 1 |
| Dag1      | 0,306514 | 0,002842 | 0,156 | 0,184 | 1 |
| Olfml1    | 0,306848 | 0,01904  | 0,563 | 0,637 | 1 |
| Nucb1     | 0,306873 | 0,021067 | 0,481 | 0,57  | 1 |
| Lrp6      | 0,30693  | 0,077679 | 0,552 | 0,57  | 1 |
| Etf1      | 0,306948 | 0,011873 | 0,42  | 0,487 | 1 |

|           |          |          |       |       |   |
|-----------|----------|----------|-------|-------|---|
| Ppp4r2    | 0,307001 | 0,06929  | 0,661 | 0,671 | 1 |
| Pld2      | 0,307204 | 0,05326  | 0,143 | 0,124 | 1 |
| Pml       | 0,307522 | 0,051559 | 0,125 | 0,108 | 1 |
| Zbtb18    | 0,307561 | -0,01827 | 0,139 | 0,165 | 1 |
| Mapkapk3  | 0,307656 | -0,0027  | 0,013 | 0,021 | 1 |
| Cage1     | 0,307656 | -0,00631 | 0,013 | 0,021 | 1 |
| Eef1akmt4 | 0,307656 | -0,00631 | 0,013 | 0,021 | 1 |
| Zfp772    | 0,308325 | 0,02294  | 0,053 | 0,04  | 1 |
| Zbtb4     | 0,30843  | 0,101168 | 0,339 | 0,333 | 1 |
| Kpna6     | 0,308516 | -0,01099 | 0,316 | 0,354 | 1 |
| Lrrc41    | 0,308632 | -0,00327 | 0,253 | 0,291 | 1 |
| Mtif2     | 0,308912 | -0,01616 | 0,194 | 0,224 | 1 |
| Vezt      | 0,309011 | 0,005604 | 0,358 | 0,407 | 1 |
| Exoc2     | 0,309082 | -0,00424 | 0,229 | 0,264 | 1 |
| Rrp9      | 0,309114 | 0,02735  | 0,222 | 0,262 | 1 |
| Mrm1      | 0,309436 | -0,01908 | 0,084 | 0,103 | 1 |
| Fgfr4     | 0,309447 | 0,026073 | 0,053 | 0,04  | 1 |
| Gm20721   | 0,309945 | -0,0045  | 0,013 | 0,021 | 1 |
| Pcgf6     | 0,310128 | -0,01996 | 0,108 | 0,129 | 1 |
| Gm26609   | 0,310143 | 0,03346  | 0,039 | 0,027 | 1 |
| Zbtb49    | 0,310159 | 0,005497 | 0,051 | 0,068 | 1 |
| Rnf44     | 0,310333 | -0,01419 | 0,378 | 0,426 | 1 |
| Zfp954    | 0,310655 | 0,033735 | 0,143 | 0,122 | 1 |
| Eml4      | 0,310715 | -0,00398 | 0,11  | 0,133 | 1 |
| Fn3krp    | 0,310723 | 0,039527 | 0,189 | 0,167 | 1 |
| H2afy     | 0,310879 | -0,03848 | 0,602 | 0,627 | 1 |
| Flvcr1    | 0,31112  | 0,036739 | 0,125 | 0,105 | 1 |
| Wdr17     | 0,312189 | 0,018093 | 0,031 | 0,021 | 1 |
| Gm15559   | 0,312246 | 0,008058 | 0,013 | 0,021 | 1 |
| Nnat      | 0,312354 | 0,020914 | 0,053 | 0,04  | 1 |
| Mcm6      | 0,312691 | 0,023828 | 0,077 | 0,061 | 1 |
| Akap10    | 0,31309  | 0,004225 | 0,158 | 0,188 | 1 |
| Slc27a1   | 0,313121 | 0,04333  | 0,422 | 0,485 | 1 |
| Napb      | 0,31317  | 0,050605 | 0,15  | 0,131 | 1 |
| Rbpj      | 0,313381 | -0,00306 | 0,391 | 0,443 | 1 |
| Nol11     | 0,313441 | -0,00723 | 0,255 | 0,285 | 1 |
| Gpr21     | 0,313635 | 0,013391 | 0,031 | 0,021 | 1 |
| Cadm3     | 0,31377  | 0,026641 | 0,152 | 0,131 | 1 |
| Urm1      | 0,314199 | -0,01307 | 0,758 | 0,814 | 1 |
| Ppp3ca    | 0,31454  | -0,00289 | 0,916 | 0,911 | 1 |
| Cmtr2     | 0,315128 | 0,018302 | 0,061 | 0,046 | 1 |
| Polg      | 0,315192 | 0,010624 | 0,174 | 0,205 | 1 |
| Tmem127   | 0,315538 | 0,015132 | 0,398 | 0,464 | 1 |
| Aebp2     | 0,315817 | 0,07356  | 0,53  | 0,553 | 1 |
| Caly      | 0,315943 | -0,00837 | 0,015 | 0,023 | 1 |
| Zfp54     | 0,315943 | -0,00837 | 0,015 | 0,023 | 1 |
| Nfe2l3    | 0,31652  | -0,00497 | 0,593 | 0,665 | 1 |
| Ccnb1ip1  | 0,316874 | 0,018646 | 0,046 | 0,034 | 1 |
| Trappc8   | 0,317003 | 0,002046 | 0,354 | 0,401 | 1 |
| Sh3tc2    | 0,317357 | 4,18E-05 | 0,235 | 0,268 | 1 |
| Slc8a3    | 0,317443 | -0,00627 | 0,138 | 0,162 | 1 |
| Nid1      | 0,317461 | 0,051755 | 0,218 | 0,196 | 1 |

|           |          |          |       |       |   |
|-----------|----------|----------|-------|-------|---|
| Tmem176b  | 0,317616 | 0,04726  | 0,139 | 0,12  | 1 |
| Epha1     | 0,317658 | 0,01746  | 0,053 | 0,04  | 1 |
| Ipo13     | 0,317817 | -0,02237 | 0,683 | 0,728 | 1 |
| Mapk8ip1  | 0,318183 | -0,02257 | 1     | 0,998 | 1 |
| Pcdhb11   | 0,318229 | 0,024167 | 0,039 | 0,027 | 1 |
| Cd3eap    | 0,318404 | 0,008281 | 0,218 | 0,253 | 1 |
| Arrb2     | 0,318522 | -0,0003  | 0,112 | 0,135 | 1 |
| Crnk1     | 0,318648 | 0,006375 | 0,251 | 0,289 | 1 |
| Lrrcc1    | 0,318813 | -0,0218  | 0,259 | 0,291 | 1 |
| 18100320  | 0,320026 | -0,00462 | 0,084 | 0,103 | 1 |
| Gxylt1    | 0,320151 | 0,091372 | 0,352 | 0,346 | 1 |
| Brpf1     | 0,320368 | -0,00985 | 0,189 | 0,215 | 1 |
| Furin     | 0,320415 | -0,00625 | 0,211 | 0,243 | 1 |
| Gm44037   | 0,3208   | -0,00683 | 0,004 | 0,008 | 1 |
| Pcolce    | 0,3208   | -0,00683 | 0,004 | 0,008 | 1 |
| Gm26540   | 0,3208   | -0,00683 | 0,004 | 0,008 | 1 |
| Llgl2     | 0,3208   | -0,00683 | 0,004 | 0,008 | 1 |
| Serpina3m | 0,3208   | -0,00683 | 0,004 | 0,008 | 1 |
| Gm38399   | 0,320811 | -0,00476 | 0,015 | 0,023 | 1 |
| Acsl4     | 0,321101 | 0,062194 | 0,207 | 0,188 | 1 |
| Sap130    | 0,321541 | 0,047212 | 0,11  | 0,093 | 1 |
| 2900009JC | 0,321585 | -0,00474 | 0,004 | 0,008 | 1 |
| Aspm      | 0,321585 | -0,00474 | 0,004 | 0,008 | 1 |
| Rgs1      | 0,321585 | -0,00474 | 0,004 | 0,008 | 1 |
| Gm37640   | 0,321585 | -0,00474 | 0,004 | 0,008 | 1 |
| 493343011 | 0,321585 | -0,00474 | 0,004 | 0,008 | 1 |
| Tes       | 0,321585 | -0,00474 | 0,004 | 0,008 | 1 |
| Vmn1r4    | 0,321585 | -0,00474 | 0,004 | 0,008 | 1 |
| Ccdc8     | 0,321585 | -0,00474 | 0,004 | 0,008 | 1 |
| Gm45359   | 0,321585 | -0,00474 | 0,004 | 0,008 | 1 |
| 4933417D  | 0,321585 | -0,00474 | 0,004 | 0,008 | 1 |
| Gm47794   | 0,321585 | -0,00474 | 0,004 | 0,008 | 1 |
| AC061963  | 0,321585 | -0,00474 | 0,004 | 0,008 | 1 |
| Gm10642   | 0,321585 | -0,00474 | 0,004 | 0,008 | 1 |
| A730071L1 | 0,321585 | -0,00474 | 0,004 | 0,008 | 1 |
| Olf318    | 0,321585 | -0,00474 | 0,004 | 0,008 | 1 |
| Gm12278   | 0,321585 | -0,00474 | 0,004 | 0,008 | 1 |
| Gm48610   | 0,321585 | -0,00474 | 0,004 | 0,008 | 1 |
| Cthrc1    | 0,321585 | -0,00474 | 0,004 | 0,008 | 1 |
| AC125141  | 0,321585 | -0,00474 | 0,004 | 0,008 | 1 |
| G430049JC | 0,321585 | -0,00474 | 0,004 | 0,008 | 1 |
| Rgs7bp    | 0,321587 | -0,00709 | 0,004 | 0,008 | 1 |
| Gm16212   | 0,321706 | -0,00322 | 0,015 | 0,023 | 1 |
| Haus6     | 0,321747 | -0,01237 | 0,156 | 0,181 | 1 |
| Pja1      | 0,321938 | 0,027135 | 0,53  | 0,601 | 1 |
| Drp2      | 0,32198  | -0,0322  | 0,004 | 0,008 | 1 |
| Slc12a6   | 0,322332 | 0,020557 | 0,33  | 0,378 | 1 |
| Hspa1l    | 0,322373 | -0,005   | 0,004 | 0,008 | 1 |
| Krr1      | 0,322416 | 0,024769 | 0,305 | 0,35  | 1 |
| 9330104G  | 0,322596 | -0,01008 | 0,081 | 0,099 | 1 |
| 1700021N  | 0,322767 | -0,00318 | 0,004 | 0,008 | 1 |
| Gm26625   | 0,323161 | -0,00109 | 0,004 | 0,008 | 1 |

|           |          |          |       |       |   |
|-----------|----------|----------|-------|-------|---|
| Unc80     | 0,323161 | -0,00291 | 0,004 | 0,008 | 1 |
| A830008Ez | 0,323161 | -0,00291 | 0,004 | 0,008 | 1 |
| Olf1124   | 0,323161 | -0,00291 | 0,004 | 0,008 | 1 |
| Draxin    | 0,323161 | -0,00291 | 0,004 | 0,008 | 1 |
| Styxl1    | 0,323161 | -0,00291 | 0,004 | 0,008 | 1 |
| Sap25     | 0,323161 | -0,00291 | 0,004 | 0,008 | 1 |
| Rasgef1a  | 0,323161 | -0,00291 | 0,004 | 0,008 | 1 |
| Wdr93     | 0,323161 | -0,00291 | 0,004 | 0,008 | 1 |
| Agpat2    | 0,323164 | 0,022837 | 0,026 | 0,017 | 1 |
| Gm14302   | 0,323262 | 0,000632 | 0,015 | 0,023 | 1 |
| Pqlc1     | 0,323262 | -0,00116 | 0,015 | 0,023 | 1 |
| Ablim2    | 0,323874 | 0,095633 | 0,49  | 0,5   | 1 |
| H2-T22    | 0,323902 | 0,036878 | 0,099 | 0,082 | 1 |
| Pip4k2b   | 0,324155 | 0,034981 | 0,22  | 0,198 | 1 |
| Trmt44    | 0,324422 | -0,01601 | 0,066 | 0,082 | 1 |
| Smg8      | 0,324497 | -0,01159 | 0,073 | 0,091 | 1 |
| Acap3     | 0,324646 | 0,002469 | 0,152 | 0,179 | 1 |
| Masp2     | 0,324741 | 0,002546 | 0,004 | 0,008 | 1 |
| Slc35f1   | 0,324741 | -0,00109 | 0,004 | 0,008 | 1 |
| Chrne     | 0,324741 | -0,00109 | 0,004 | 0,008 | 1 |
| Ralgapa1  | 0,325012 | 0,00516  | 0,466 | 0,523 | 1 |
| Bop1      | 0,325043 | 0,015737 | 0,229 | 0,268 | 1 |
| Cdc25a    | 0,32509  | -0,00818 | 0,081 | 0,099 | 1 |
| Caprin2   | 0,32517  | 0,060567 | 0,094 | 0,078 | 1 |
| Taok2     | 0,325886 | 0,030702 | 0,356 | 0,426 | 1 |
| Smc6      | 0,326521 | 0,004218 | 0,609 | 0,69  | 1 |
| Igsf8     | 0,326618 | 0,046437 | 0,756 | 0,724 | 1 |
| Qk        | 0,326684 | 0,032236 | 1     | 0,998 | 1 |
| Tsr1      | 0,32675  | -0,00821 | 0,075 | 0,093 | 1 |
| Dync1li2  | 0,326802 | 0,054189 | 0,897 | 0,873 | 1 |
| Mroh1     | 0,326834 | 0,00234  | 0,143 | 0,169 | 1 |
| D2hgdh    | 0,326917 | 0,010056 | 0,11  | 0,133 | 1 |
| Rnf141    | 0,326956 | 0,063127 | 0,888 | 0,878 | 1 |
| Rufy2     | 0,326984 | 0,011019 | 0,475 | 0,563 | 1 |
| Sfswap    | 0,32701  | 0,071519 | 0,563 | 0,578 | 1 |
| Htra1     | 0,327105 | 0,145125 | 0,754 | 0,785 | 1 |
| Inpp1     | 0,327121 | 0,0453   | 0,218 | 0,196 | 1 |
| Phactr3   | 0,327157 | 0,053643 | 0,483 | 0,468 | 1 |
| Klhl36    | 0,327534 | -0,00707 | 0,017 | 0,025 | 1 |
| Olfm1     | 0,327792 | 0,005472 | 0,372 | 0,428 | 1 |
| Styx      | 0,328146 | 0,040803 | 0,2   | 0,236 | 1 |
| Gm17275   | 0,328163 | 0,022837 | 0,026 | 0,017 | 1 |
| Tpm3      | 0,328207 | 0,071011 | 0,862 | 0,882 | 1 |
| Pkn1      | 0,328257 | 0,006764 | 0,341 | 0,386 | 1 |
| Kat14     | 0,328738 | 0,004773 | 0,18  | 0,209 | 1 |
| Nup155    | 0,329093 | 0,033651 | 0,13  | 0,112 | 1 |
| Unk       | 0,329286 | 0,025218 | 0,228 | 0,266 | 1 |
| Fam219a   | 0,329324 | 0,013121 | 0,418 | 0,485 | 1 |
| Tmem30a   | 0,32942  | 0,052822 | 0,983 | 0,987 | 1 |
| Fam173a   | 0,32983  | -0,01117 | 0,631 | 0,7   | 1 |
| Gm10471   | 0,329839 | 0,015757 | 0,026 | 0,017 | 1 |
| Fam227a   | 0,329839 | 0,015757 | 0,026 | 0,017 | 1 |

|           |          |          |       |       |   |
|-----------|----------|----------|-------|-------|---|
| Fbxo33    | 0,329906 | 0,070493 | 0,222 | 0,268 | 1 |
| Usp42     | 0,330171 | 0,076645 | 0,213 | 0,198 | 1 |
| E330009J0 | 0,330221 | 0,094389 | 0,495 | 0,506 | 1 |
| Dhdh      | 0,330388 | -0,01083 | 0,073 | 0,091 | 1 |
| Prdm5     | 0,330688 | 0,002596 | 0,158 | 0,186 | 1 |
| Nup205    | 0,331317 | 0,034191 | 0,161 | 0,141 | 1 |
| Unc93b1   | 0,331357 | -0,01316 | 0,145 | 0,169 | 1 |
| Wnk3      | 0,331479 | -0,01578 | 0,061 | 0,076 | 1 |
| Myo10     | 0,331586 | -0,00913 | 0,018 | 0,027 | 1 |
| Zfp276    | 0,331775 | -0,00013 | 0,334 | 0,378 | 1 |
| Mybl1     | 0,331816 | -0,01113 | 0,068 | 0,084 | 1 |
| E430024P1 | 0,332053 | -0,00322 | 0,017 | 0,025 | 1 |
| Shcbp1    | 0,332053 | 0,000362 | 0,017 | 0,025 | 1 |
| Gm10382   | 0,332053 | -0,00143 | 0,017 | 0,025 | 1 |
| Klhl18    | 0,332316 | 0,011794 | 0,224 | 0,259 | 1 |
| Cenpf     | 0,332519 | 0,058143 | 0,048 | 0,036 | 1 |
| Scn8a     | 0,332773 | 0,036121 | 0,073 | 0,059 | 1 |
| Abhd11    | 0,332887 | -0,00403 | 0,233 | 0,266 | 1 |
| Nemf      | 0,333004 | 0,007459 | 0,624 | 0,679 | 1 |
| Bloc1s1   | 0,33309  | 0,018106 | 0,65  | 0,749 | 1 |
| Prpf19    | 0,333093 | -0,03312 | 0,736 | 0,747 | 1 |
| 1700037Hl | 0,333421 | -0,00967 | 0,073 | 0,091 | 1 |
| Rgma      | 0,333645 | 0,000484 | 0,598 | 0,662 | 1 |
| Zbtb3     | 0,333651 | -0,00707 | 0,018 | 0,027 | 1 |
| Fkbp5     | 0,333977 | 0,025099 | 0,033 | 0,023 | 1 |
| Rack1     | 0,334064 | -0,00575 | 0,947 | 0,939 | 1 |
| 1700047M  | 0,334112 | -0,00387 | 0,928 | 0,939 | 1 |
| Ccnd1     | 0,334231 | 0,163729 | 0,05  | 0,065 | 1 |
| Tnks      | 0,334492 | 0,065317 | 0,668 | 0,679 | 1 |
| Atp13a1   | 0,334546 | -0,01056 | 0,255 | 0,287 | 1 |
| Isy1      | 0,334567 | 0,003635 | 0,191 | 0,222 | 1 |
| Grik3     | 0,33492  | 0,020458 | 0,026 | 0,017 | 1 |
| Hdlbp     | 0,335437 | -0,01338 | 0,639 | 0,69  | 1 |
| Dhx33     | 0,335499 | -0,00896 | 0,068 | 0,084 | 1 |
| Mki67     | 0,336359 | -0,00348 | 0,018 | 0,027 | 1 |
| Zfp868    | 0,336545 | 0,002207 | 0,139 | 0,165 | 1 |
| Gm26664   | 0,336842 | -0,01191 | 0,022 | 0,032 | 1 |
| Tspan4    | 0,336984 | -0,02268 | 0,026 | 0,036 | 1 |
| Gm1979    | 0,337109 | 0,012168 | 0,009 | 0,004 | 1 |
| Anapc5    | 0,337111 | 0,048144 | 0,866 | 0,854 | 1 |
| Rasl12    | 0,337116 | -0,01053 | 0,138 | 0,16  | 1 |
| Pcdhgb2   | 0,337201 | -0,00374 | 0,018 | 0,027 | 1 |
| Car3      | 0,337273 | 0,007493 | 0,017 | 0,025 | 1 |
| Rnf213    | 0,33758  | 0,025457 | 0,055 | 0,042 | 1 |
| Yes1      | 0,337617 | 0,039499 | 0,176 | 0,156 | 1 |
| Bahd1     | 0,337822 | -0,0092  | 0,07  | 0,086 | 1 |
| Colgalt1  | 0,337834 | 0,010806 | 0,306 | 0,35  | 1 |
| Fam83e    | 0,33786  | 0,010362 | 0,009 | 0,004 | 1 |
| Dpf1      | 0,337877 | 0,026842 | 0,033 | 0,023 | 1 |
| Ctxn3     | 0,338224 | -0,00605 | 0,02  | 0,03  | 1 |
| Ppp3r1    | 0,338231 | 0,001536 | 0,372 | 0,42  | 1 |
| Vamp1     | 0,338403 | 0,002641 | 0,084 | 0,103 | 1 |

|           |          |          |       |       |   |
|-----------|----------|----------|-------|-------|---|
| Myl6b     | 0,338517 | 0,017135 | 0,072 | 0,057 | 1 |
| Gm26601   | 0,338537 | 0,028373 | 0,09  | 0,074 | 1 |
| Nr1h3     | 0,338612 | 0,012168 | 0,009 | 0,004 | 1 |
| Etnk2     | 0,338612 | 0,008552 | 0,009 | 0,004 | 1 |
| Klk7      | 0,338612 | 0,008552 | 0,009 | 0,004 | 1 |
| Clstn2    | 0,338612 | 0,008552 | 0,009 | 0,004 | 1 |
| Cgref1    | 0,338612 | 0,013972 | 0,009 | 0,004 | 1 |
| Spata19   | 0,338612 | 0,010362 | 0,009 | 0,004 | 1 |
| Csnk1d    | 0,338772 | 0,024911 | 0,442 | 0,513 | 1 |
| Rab33a    | 0,339026 | -0,00342 | 0,209 | 0,238 | 1 |
| Tdp2      | 0,339108 | -0,00479 | 0,204 | 0,234 | 1 |
| Pitpnm2   | 0,339365 | 0,008552 | 0,009 | 0,004 | 1 |
| A330074K  | 0,339365 | 0,008552 | 0,009 | 0,004 | 1 |
| Vsig10l   | 0,339365 | 0,006738 | 0,009 | 0,004 | 1 |
| Gm11149   | 0,339365 | 0,006738 | 0,009 | 0,004 | 1 |
| Jag2      | 0,339365 | 0,006738 | 0,009 | 0,004 | 1 |
| Rab3il1   | 0,339403 | -0,0099  | 0,072 | 0,089 | 1 |
| Cdk14     | 0,339405 | -0,01175 | 0,103 | 0,122 | 1 |
| Kansl3    | 0,339591 | 0,023935 | 0,284 | 0,329 | 1 |
| 4930558K  | 0,340118 | 0,004922 | 0,009 | 0,004 | 1 |
| Gm26691   | 0,340118 | 0,004922 | 0,009 | 0,004 | 1 |
| Map3k6    | 0,340118 | 0,004922 | 0,009 | 0,004 | 1 |
| Triml2    | 0,340118 | 0,004922 | 0,009 | 0,004 | 1 |
| Ces2f     | 0,340118 | 0,004922 | 0,009 | 0,004 | 1 |
| C2300351l | 0,340118 | 0,004922 | 0,009 | 0,004 | 1 |
| Gm47071   | 0,340118 | 0,004922 | 0,009 | 0,004 | 1 |
| Gm26694   | 0,340118 | 0,004922 | 0,009 | 0,004 | 1 |
| Slc38a9   | 0,340119 | 0,012916 | 0,396 | 0,451 | 1 |
| Habp4     | 0,340145 | -0,00649 | 0,141 | 0,165 | 1 |
| Top2b     | 0,340462 | -0,00536 | 0,631 | 0,703 | 1 |
| Klhl2     | 0,340679 | 0,046569 | 0,978 | 0,979 | 1 |
| Gpsm2     | 0,340717 | 0,025433 | 0,262 | 0,306 | 1 |
| Tmem86b   | 0,341102 | 0,020992 | 0,04  | 0,03  | 1 |
| Mapre1    | 0,341267 | 0,078238 | 0,725 | 0,768 | 1 |
| Trpc1     | 0,341496 | -0,0006  | 0,393 | 0,441 | 1 |
| Arhgef3   | 0,341507 | -0,01643 | 0,026 | 0,036 | 1 |
| A230083G  | 0,34201  | 0,002823 | 0,009 | 0,004 | 1 |
| Mfsd12    | 0,342467 | 0,056643 | 0,088 | 0,074 | 1 |
| Ikzf4     | 0,342647 | 0,016356 | 0,02  | 0,013 | 1 |
| Hap1      | 0,342746 | -0,01037 | 0,024 | 0,034 | 1 |
| Nup62     | 0,342788 | 0,029981 | 0,174 | 0,154 | 1 |
| Ccdc93    | 0,343213 | -0,01115 | 0,105 | 0,124 | 1 |
| Fchsd1    | 0,343296 | 0,014867 | 0,033 | 0,023 | 1 |
| Zfp873    | 0,343302 | -0,01191 | 0,026 | 0,036 | 1 |
| Ncmap     | 0,343439 | -0,01191 | 0,022 | 0,032 | 1 |
| Zhx3      | 0,343968 | 0,005093 | 0,255 | 0,291 | 1 |
| 9130023H  | 0,343983 | -0,01175 | 0,051 | 0,065 | 1 |
| Gm17477   | 0,344221 | -0,00426 | 0,022 | 0,032 | 1 |
| Pcdhb9    | 0,344246 | -0,00806 | 0,022 | 0,032 | 1 |
| 8030462N  | 0,344461 | 0,004555 | 0,068 | 0,084 | 1 |
| Rangap1   | 0,344482 | 0,007676 | 0,569 | 0,643 | 1 |
| Gga1      | 0,344569 | 0,016653 | 0,33  | 0,371 | 1 |

|           |          |          |       |       |   |
|-----------|----------|----------|-------|-------|---|
| Svil      | 0,34478  | -0,01726 | 0,09  | 0,108 | 1 |
| Wasf2     | 0,345049 | 0,067256 | 0,677 | 0,7   | 1 |
| Lypla2    | 0,345301 | 0,00494  | 0,222 | 0,251 | 1 |
| Gpt       | 0,345611 | 0,088702 | 0,521 | 0,527 | 1 |
| Chd9      | 0,345626 | 0,004435 | 0,534 | 0,597 | 1 |
| Phf2011   | 0,345787 | 0,074628 | 0,633 | 0,654 | 1 |
| Prpf6     | 0,345869 | 0,006826 | 0,31  | 0,35  | 1 |
| C2cd5     | 0,345883 | 0,071129 | 0,365 | 0,352 | 1 |
| Spg20     | 0,345895 | 0,058856 | 0,972 | 0,96  | 1 |
| Tmem107   | 0,345955 | 0,01602  | 0,048 | 0,036 | 1 |
| Tgfbr3    | 0,34607  | 0,056166 | 0,174 | 0,158 | 1 |
| Efna1     | 0,346123 | 0,081223 | 0,349 | 0,34  | 1 |
| Mmp11     | 0,346193 | -0,01917 | 0,04  | 0,053 | 1 |
| Hoxa5     | 0,346222 | 0,033232 | 0,05  | 0,038 | 1 |
| Tet3      | 0,346289 | 0,131605 | 0,477 | 0,513 | 1 |
| Dtx2      | 0,346353 | -0,0093  | 0,103 | 0,122 | 1 |
| Gm45250   | 0,346382 | -0,0063  | 0,022 | 0,032 | 1 |
| Fgd1      | 0,346506 | -0,00783 | 0,024 | 0,034 | 1 |
| Gng10     | 0,346506 | -0,00783 | 0,024 | 0,034 | 1 |
| Sgo2a     | 0,34654  | -0,00883 | 0,024 | 0,034 | 1 |
| Psmc6     | 0,346792 | 0,003078 | 0,802 | 0,85  | 1 |
| Kif3b     | 0,346806 | 0,005652 | 0,134 | 0,158 | 1 |
| H2-DMa    | 0,347061 | 0,010994 | 0,02  | 0,013 | 1 |
| Arid3a    | 0,347371 | -0,00678 | 0,055 | 0,07  | 1 |
| Cbx8      | 0,347399 | -0,00384 | 0,057 | 0,072 | 1 |
| Wdr27     | 0,347411 | -0,00703 | 0,053 | 0,068 | 1 |
| Ralgapa2  | 0,347413 | 0,009862 | 0,204 | 0,236 | 1 |
| Ipo7      | 0,347488 | 0,030121 | 0,396 | 0,47  | 1 |
| Atn1      | 0,347513 | 0,089291 | 0,488 | 0,506 | 1 |
| Mpp5      | 0,347642 | 0,042743 | 0,846 | 0,835 | 1 |
| Cnppd1    | 0,347845 | 0,092318 | 0,4   | 0,416 | 1 |
| Rubcn     | 0,347892 | 0,065561 | 0,428 | 0,424 | 1 |
| Cers5     | 0,34822  | 0,003713 | 0,345 | 0,388 | 1 |
| Grk5      | 0,348247 | -0,00859 | 0,024 | 0,034 | 1 |
| Prkci     | 0,348314 | -0,0116  | 0,143 | 0,165 | 1 |
| Trim65    | 0,348521 | -0,01113 | 0,064 | 0,08  | 1 |
| Cdc42bpb  | 0,348865 | -0,0086  | 0,33  | 0,369 | 1 |
| 1700052K: | 0,348974 | -0,00481 | 0,048 | 0,061 | 1 |
| Pi4kb     | 0,349183 | 0,034159 | 0,226 | 0,205 | 1 |
| Gdap2     | 0,349309 | -0,01096 | 0,138 | 0,16  | 1 |
| Gm42695   | 0,349736 | -0,00426 | 0,022 | 0,032 | 1 |
| D830024N  | 0,349811 | -0,00977 | 0,05  | 0,063 | 1 |
| Cdca8     | 0,350141 | -0,0063  | 0,024 | 0,034 | 1 |
| Mapk8     | 0,350176 | 0,07137  | 0,317 | 0,31  | 1 |
| Zfp454    | 0,350188 | -0,00554 | 0,029 | 0,04  | 1 |
| Luc7l     | 0,35032  | 0,071919 | 0,433 | 0,437 | 1 |
| Tmem177   | 0,35072  | -0,01158 | 0,035 | 0,046 | 1 |
| Nova2     | 0,35127  | 0,007119 | 0,02  | 0,013 | 1 |
| Wdr13     | 0,351443 | 0,002349 | 0,314 | 0,352 | 1 |
| Aco1      | 0,351587 | 0,005692 | 0,218 | 0,253 | 1 |
| Dnttip2   | 0,351965 | 0,037261 | 0,499 | 0,586 | 1 |
| Slc35b4   | 0,35203  | -0,00906 | 0,237 | 0,268 | 1 |

|           |          |          |       |   |   |
|-----------|----------|----------|-------|---|---|
| Col3a1    | 0,352049 | 0,016379 | 0,002 | 0 | 1 |
| Pax3      | 0,352049 | 0,016379 | 0,002 | 0 | 1 |
| Rab11fip1 | 0,352049 | 0,010949 | 0,002 | 0 | 1 |
| Oxtr      | 0,352049 | 0,009132 | 0,002 | 0 | 1 |
| Eln       | 0,352049 | 0,007313 | 0,002 | 0 | 1 |
| Rcn3      | 0,352049 | 0,007313 | 0,002 | 0 | 1 |
| Lamb2     | 0,352049 | 0,007313 | 0,002 | 0 | 1 |
| Tmprss7   | 0,352049 | 0,007313 | 0,002 | 0 | 1 |
| Chrm1     | 0,352049 | 0,007313 | 0,002 | 0 | 1 |
| Ccdc120   | 0,352049 | 0,005489 | 0,002 | 0 | 1 |
| Necab1    | 0,352049 | 0,005489 | 0,002 | 0 | 1 |
| Reep1     | 0,352049 | 0,005489 | 0,002 | 0 | 1 |
| Adm       | 0,352049 | 0,005489 | 0,002 | 0 | 1 |
| Adamts10  | 0,352049 | 0,005489 | 0,002 | 0 | 1 |
| 4933407L2 | 0,352049 | 0,003663 | 0,002 | 0 | 1 |
| Ildr2     | 0,352049 | 0,003663 | 0,002 | 0 | 1 |
| Cdca7     | 0,352049 | 0,003663 | 0,002 | 0 | 1 |
| 4933423P2 | 0,352049 | 0,003663 | 0,002 | 0 | 1 |
| Ncaph     | 0,352049 | 0,003663 | 0,002 | 0 | 1 |
| Stoml3    | 0,352049 | 0,003663 | 0,002 | 0 | 1 |
| Cd53      | 0,352049 | 0,003663 | 0,002 | 0 | 1 |
| Tctex1d4  | 0,352049 | 0,003663 | 0,002 | 0 | 1 |
| Ptpru     | 0,352049 | 0,003663 | 0,002 | 0 | 1 |
| 4930553P2 | 0,352049 | 0,003663 | 0,002 | 0 | 1 |
| Gm44148   | 0,352049 | 0,003663 | 0,002 | 0 | 1 |
| Dll3      | 0,352049 | 0,003663 | 0,002 | 0 | 1 |
| Kcnmb4os1 | 0,352049 | 0,003663 | 0,002 | 0 | 1 |
| Mmp19     | 0,352049 | 0,003663 | 0,002 | 0 | 1 |
| Hpgd      | 0,352049 | 0,003663 | 0,002 | 0 | 1 |
| Adcy7     | 0,352049 | 0,003663 | 0,002 | 0 | 1 |
| Adgrg3    | 0,352049 | 0,003663 | 0,002 | 0 | 1 |
| Nid2      | 0,352049 | 0,003663 | 0,002 | 0 | 1 |
| Dleu7     | 0,352049 | 0,003663 | 0,002 | 0 | 1 |
| Gpc6      | 0,352049 | 0,003663 | 0,002 | 0 | 1 |
| Naalad2   | 0,352049 | 0,003663 | 0,002 | 0 | 1 |
| Havcr2    | 0,352049 | 0,003663 | 0,002 | 0 | 1 |
| Sgcd      | 0,352049 | 0,003663 | 0,002 | 0 | 1 |
| N4bp3     | 0,352049 | 0,003663 | 0,002 | 0 | 1 |
| Cntnap1   | 0,352049 | 0,003663 | 0,002 | 0 | 1 |
| Evpl      | 0,352049 | 0,003663 | 0,002 | 0 | 1 |
| Al463229  | 0,352049 | 0,003663 | 0,002 | 0 | 1 |
| Hk3       | 0,352049 | 0,003663 | 0,002 | 0 | 1 |
| Gm31946   | 0,352049 | 0,003663 | 0,002 | 0 | 1 |
| Ankrd34b  | 0,352049 | 0,003663 | 0,002 | 0 | 1 |
| K230010J2 | 0,352049 | 0,003663 | 0,002 | 0 | 1 |
| Cacng2    | 0,352049 | 0,003663 | 0,002 | 0 | 1 |
| Myo1f     | 0,352049 | 0,003663 | 0,002 | 0 | 1 |
| C230072F1 | 0,352049 | 0,003663 | 0,002 | 0 | 1 |
| Cbln2     | 0,352049 | 0,003663 | 0,002 | 0 | 1 |
| Sptbn2    | 0,352049 | 0,003663 | 0,002 | 0 | 1 |
| Blnk      | 0,352049 | 0,003663 | 0,002 | 0 | 1 |
| Pi15      | 0,352049 | 0,001833 | 0,002 | 0 | 1 |



|           |          |          |       |   |   |
|-----------|----------|----------|-------|---|---|
| Gm973     | 0,352049 | 0,001833 | 0,002 | 0 | 1 |
| Sp140     | 0,352049 | 0,001833 | 0,002 | 0 | 1 |
| Bok       | 0,352049 | 0,001833 | 0,002 | 0 | 1 |
| Cntnap5a  | 0,352049 | 0,001833 | 0,002 | 0 | 1 |
| Dyrk3     | 0,352049 | 0,001833 | 0,002 | 0 | 1 |
| Prelp     | 0,352049 | 0,001833 | 0,002 | 0 | 1 |
| Rcsd1     | 0,352049 | 0,001833 | 0,002 | 0 | 1 |
| Fcgr3     | 0,352049 | 0,001833 | 0,002 | 0 | 1 |
| Klhdc9    | 0,352049 | 0,001833 | 0,002 | 0 | 1 |
| Gm34342   | 0,352049 | 0,001833 | 0,002 | 0 | 1 |
| Proser2   | 0,352049 | 0,001833 | 0,002 | 0 | 1 |
| Card9     | 0,352049 | 0,001833 | 0,002 | 0 | 1 |
| 1700007K: | 0,352049 | 0,001833 | 0,002 | 0 | 1 |
| Lmx1b     | 0,352049 | 0,001833 | 0,002 | 0 | 1 |
| Scn3a     | 0,352049 | 0,001833 | 0,002 | 0 | 1 |
| Spi1      | 0,352049 | 0,001833 | 0,002 | 0 | 1 |
| Pak6      | 0,352049 | 0,001833 | 0,002 | 0 | 1 |
| Plcb2     | 0,352049 | 0,001833 | 0,002 | 0 | 1 |
| Mertk     | 0,352049 | 0,001833 | 0,002 | 0 | 1 |
| Lbp       | 0,352049 | 0,001833 | 0,002 | 0 | 1 |
| Sycp2     | 0,352049 | 0,001833 | 0,002 | 0 | 1 |
| Was       | 0,352049 | 0,001833 | 0,002 | 0 | 1 |
| Slc25a43  | 0,352049 | 0,001833 | 0,002 | 0 | 1 |
| Hs6st2    | 0,352049 | 0,001833 | 0,002 | 0 | 1 |
| Pnma3     | 0,352049 | 0,001833 | 0,002 | 0 | 1 |
| Tmem164   | 0,352049 | 0,001833 | 0,002 | 0 | 1 |
| Chrd11    | 0,352049 | 0,001833 | 0,002 | 0 | 1 |
| Gm16337   | 0,352049 | 0,001833 | 0,002 | 0 | 1 |
| Wdr49     | 0,352049 | 0,001833 | 0,002 | 0 | 1 |
| Kirrel    | 0,352049 | 0,001833 | 0,002 | 0 | 1 |
| Lrrc71    | 0,352049 | 0,001833 | 0,002 | 0 | 1 |
| Dennd2c   | 0,352049 | 0,001833 | 0,002 | 0 | 1 |
| Slc44a3   | 0,352049 | 0,001833 | 0,002 | 0 | 1 |
| Dapp1     | 0,352049 | 0,001833 | 0,002 | 0 | 1 |
| Col24a1   | 0,352049 | 0,001833 | 0,002 | 0 | 1 |
| Slc44a5   | 0,352049 | 0,001833 | 0,002 | 0 | 1 |
| Penk      | 0,352049 | 0,001833 | 0,002 | 0 | 1 |
| Gem       | 0,352049 | 0,001833 | 0,002 | 0 | 1 |
| Elavl2    | 0,352049 | 0,001833 | 0,002 | 0 | 1 |
| Podn      | 0,352049 | 0,001833 | 0,002 | 0 | 1 |
| Gm12968   | 0,352049 | 0,001833 | 0,002 | 0 | 1 |
| Pdpn      | 0,352049 | 0,001833 | 0,002 | 0 | 1 |
| Tnfrsf1b  | 0,352049 | 0,001833 | 0,002 | 0 | 1 |
| Igfbp7    | 0,352049 | 0,001833 | 0,002 | 0 | 1 |
| Stbd1     | 0,352049 | 0,001833 | 0,002 | 0 | 1 |
| Prdm8     | 0,352049 | 0,001833 | 0,002 | 0 | 1 |
| Cryba4    | 0,352049 | 0,001833 | 0,002 | 0 | 1 |
| Sez6l     | 0,352049 | 0,001833 | 0,002 | 0 | 1 |
| Ksr2      | 0,352049 | 0,001833 | 0,002 | 0 | 1 |
| Tfr2      | 0,352049 | 0,001833 | 0,002 | 0 | 1 |
| Gm15410   | 0,352049 | 0,001833 | 0,002 | 0 | 1 |
| Gm3294    | 0,352049 | 0,001833 | 0,002 | 0 | 1 |

|           |          |          |       |   |   |
|-----------|----------|----------|-------|---|---|
| Prrt4     | 0,352049 | 0,001833 | 0,002 | 0 | 1 |
| Gprin3    | 0,352049 | 0,001833 | 0,002 | 0 | 1 |
| Prokr1    | 0,352049 | 0,001833 | 0,002 | 0 | 1 |
| 0610040Fc | 0,352049 | 0,001833 | 0,002 | 0 | 1 |
| 4930540M  | 0,352049 | 0,001833 | 0,002 | 0 | 1 |
| Mfap5     | 0,352049 | 0,001833 | 0,002 | 0 | 1 |
| Apobec1   | 0,352049 | 0,001833 | 0,002 | 0 | 1 |
| Vwf       | 0,352049 | 0,001833 | 0,002 | 0 | 1 |
| Cracr2a   | 0,352049 | 0,001833 | 0,002 | 0 | 1 |
| Pde3a     | 0,352049 | 0,001833 | 0,002 | 0 | 1 |
| Usp29     | 0,352049 | 0,001833 | 0,002 | 0 | 1 |
| Pou2f2    | 0,352049 | 0,001833 | 0,002 | 0 | 1 |
| Grin2d    | 0,352049 | 0,001833 | 0,002 | 0 | 1 |
| E2f8      | 0,352049 | 0,001833 | 0,002 | 0 | 1 |
| Fam189a1  | 0,352049 | 0,001833 | 0,002 | 0 | 1 |
| Hapln3    | 0,352049 | 0,001833 | 0,002 | 0 | 1 |
| P2ry6     | 0,352049 | 0,001833 | 0,002 | 0 | 1 |
| Folr1     | 0,352049 | 0,001833 | 0,002 | 0 | 1 |
| Igsf6     | 0,352049 | 0,001833 | 0,002 | 0 | 1 |
| Il21r     | 0,352049 | 0,001833 | 0,002 | 0 | 1 |
| Gm44672   | 0,352049 | 0,001833 | 0,002 | 0 | 1 |
| 6430531B: | 0,352049 | 0,001833 | 0,002 | 0 | 1 |
| Lsp1      | 0,352049 | 0,001833 | 0,002 | 0 | 1 |
| Samd5     | 0,352049 | 0,001833 | 0,002 | 0 | 1 |
| Myb       | 0,352049 | 0,001833 | 0,002 | 0 | 1 |
| Vsir      | 0,352049 | 0,001833 | 0,002 | 0 | 1 |
| Caboco1   | 0,352049 | 0,001833 | 0,002 | 0 | 1 |
| Rhobtb1   | 0,352049 | 0,001833 | 0,002 | 0 | 1 |
| Trpm2     | 0,352049 | 0,001833 | 0,002 | 0 | 1 |
| Slc1a6    | 0,352049 | 0,001833 | 0,002 | 0 | 1 |
| Shc2      | 0,352049 | 0,001833 | 0,002 | 0 | 1 |
| Nmrk2     | 0,352049 | 0,001833 | 0,002 | 0 | 1 |
| Ascl1     | 0,352049 | 0,001833 | 0,002 | 0 | 1 |
| Cfap54    | 0,352049 | 0,001833 | 0,002 | 0 | 1 |
| Lin7a     | 0,352049 | 0,001833 | 0,002 | 0 | 1 |
| E2f7      | 0,352049 | 0,001833 | 0,002 | 0 | 1 |
| Myo1a     | 0,352049 | 0,001833 | 0,002 | 0 | 1 |
| Vegfc     | 0,352049 | 0,001833 | 0,002 | 0 | 1 |
| Cyp4f18   | 0,352049 | 0,001833 | 0,002 | 0 | 1 |
| Nod2      | 0,352049 | 0,001833 | 0,002 | 0 | 1 |
| Hydin     | 0,352049 | 0,001833 | 0,002 | 0 | 1 |
| Gm2237    | 0,352049 | 0,001833 | 0,002 | 0 | 1 |
| Dnah12    | 0,352049 | 0,001833 | 0,002 | 0 | 1 |
| 1810011H: | 0,352049 | 0,001833 | 0,002 | 0 | 1 |
| Gch1      | 0,352049 | 0,001833 | 0,002 | 0 | 1 |
| Phf11b    | 0,352049 | 0,001833 | 0,002 | 0 | 1 |
| Arl11     | 0,352049 | 0,001833 | 0,002 | 0 | 1 |
| Fam167a   | 0,352049 | 0,001833 | 0,002 | 0 | 1 |
| Pbk       | 0,352049 | 0,001833 | 0,002 | 0 | 1 |
| Rubcnl    | 0,352049 | 0,001833 | 0,002 | 0 | 1 |
| Fam216b   | 0,352049 | 0,001833 | 0,002 | 0 | 1 |
| Fat3      | 0,352049 | 0,001833 | 0,002 | 0 | 1 |

|           |          |          |       |   |   |
|-----------|----------|----------|-------|---|---|
| Zfp558    | 0,352049 | 0,001833 | 0,002 | 0 | 1 |
| Gm26592   | 0,352049 | 0,001833 | 0,002 | 0 | 1 |
| Rab27a    | 0,352049 | 0,001833 | 0,002 | 0 | 1 |
| Nme9      | 0,352049 | 0,001833 | 0,002 | 0 | 1 |
| Cx3cr1    | 0,352049 | 0,001833 | 0,002 | 0 | 1 |
| Ttc21a    | 0,352049 | 0,001833 | 0,002 | 0 | 1 |
| Myo1g     | 0,352049 | 0,001833 | 0,002 | 0 | 1 |
| Gm16170   | 0,352049 | 0,001833 | 0,002 | 0 | 1 |
| Gm12185   | 0,352049 | 0,001833 | 0,002 | 0 | 1 |
| Obscn     | 0,352049 | 0,001833 | 0,002 | 0 | 1 |
| Dnah2     | 0,352049 | 0,001833 | 0,002 | 0 | 1 |
| Bcl6b     | 0,352049 | 0,001833 | 0,002 | 0 | 1 |
| Cxcl16    | 0,352049 | 0,001833 | 0,002 | 0 | 1 |
| Haspin    | 0,352049 | 0,001833 | 0,002 | 0 | 1 |
| Tmigd1    | 0,352049 | 0,001833 | 0,002 | 0 | 1 |
| Coro6     | 0,352049 | 0,001833 | 0,002 | 0 | 1 |
| Ccl5      | 0,352049 | 0,001833 | 0,002 | 0 | 1 |
| Nog       | 0,352049 | 0,001833 | 0,002 | 0 | 1 |
| Top2a     | 0,352049 | 0,001833 | 0,002 | 0 | 1 |
| Aoc2      | 0,352049 | 0,001833 | 0,002 | 0 | 1 |
| Gjc1      | 0,352049 | 0,001833 | 0,002 | 0 | 1 |
| Nptx1     | 0,352049 | 0,001833 | 0,002 | 0 | 1 |
| Pycr1     | 0,352049 | 0,001833 | 0,002 | 0 | 1 |
| Zfp184    | 0,352049 | 0,001833 | 0,002 | 0 | 1 |
| Hist1h2bg | 0,352049 | 0,001833 | 0,002 | 0 | 1 |
| S1pr3     | 0,352049 | 0,001833 | 0,002 | 0 | 1 |
| Diras2    | 0,352049 | 0,001833 | 0,002 | 0 | 1 |
| Gm26555   | 0,352049 | 0,001833 | 0,002 | 0 | 1 |
| Slc6a19   | 0,352049 | 0,001833 | 0,002 | 0 | 1 |
| Iqgap2    | 0,352049 | 0,001833 | 0,002 | 0 | 1 |
| Gpx8      | 0,352049 | 0,001833 | 0,002 | 0 | 1 |
| Itga1     | 0,352049 | 0,001833 | 0,002 | 0 | 1 |
| L3hypdh   | 0,352049 | 0,001833 | 0,002 | 0 | 1 |
| Ppp1r36   | 0,352049 | 0,001833 | 0,002 | 0 | 1 |
| Ccdc177   | 0,352049 | 0,001833 | 0,002 | 0 | 1 |
| Acot4     | 0,352049 | 0,001833 | 0,002 | 0 | 1 |
| 4732463B( | 0,352049 | 0,001833 | 0,002 | 0 | 1 |
| Gpr68     | 0,352049 | 0,001833 | 0,002 | 0 | 1 |
| Tmem179   | 0,352049 | 0,001833 | 0,002 | 0 | 1 |
| Cdca7l    | 0,352049 | 0,001833 | 0,002 | 0 | 1 |
| Plcx3     | 0,352049 | 0,001833 | 0,002 | 0 | 1 |
| Dnah5     | 0,352049 | 0,001833 | 0,002 | 0 | 1 |
| Adcy8     | 0,352049 | 0,001833 | 0,002 | 0 | 1 |
| Gsdmd     | 0,352049 | 0,001833 | 0,002 | 0 | 1 |
| Rac2      | 0,352049 | 0,001833 | 0,002 | 0 | 1 |
| Kdelr3    | 0,352049 | 0,001833 | 0,002 | 0 | 1 |
| Pnpla3    | 0,352049 | 0,001833 | 0,002 | 0 | 1 |
| Celsr1    | 0,352049 | 0,001833 | 0,002 | 0 | 1 |
| Mapk11    | 0,352049 | 0,001833 | 0,002 | 0 | 1 |
| Odf3b     | 0,352049 | 0,001833 | 0,002 | 0 | 1 |
| Syt10     | 0,352049 | 0,001833 | 0,002 | 0 | 1 |
| Lrrk2     | 0,352049 | 0,001833 | 0,002 | 0 | 1 |

|           |          |          |       |       |   |
|-----------|----------|----------|-------|-------|---|
| Ccdc65    | 0,352049 | 0,001833 | 0,002 | 0     | 1 |
| Dhh       | 0,352049 | 0,001833 | 0,002 | 0     | 1 |
| Esp11     | 0,352049 | 0,001833 | 0,002 | 0     | 1 |
| AC118542. | 0,352049 | 0,001833 | 0,002 | 0     | 1 |
| Gp1bb     | 0,352049 | 0,001833 | 0,002 | 0     | 1 |
| Ece2      | 0,352049 | 0,001833 | 0,002 | 0     | 1 |
| Gm26569   | 0,352049 | 0,001833 | 0,002 | 0     | 1 |
| Cfap44    | 0,352049 | 0,001833 | 0,002 | 0     | 1 |
| Cd200r4   | 0,352049 | 0,001833 | 0,002 | 0     | 1 |
| Epha3     | 0,352049 | 0,001833 | 0,002 | 0     | 1 |
| Cxadr     | 0,352049 | 0,001833 | 0,002 | 0     | 1 |
| 1700110C: | 0,352049 | 0,001833 | 0,002 | 0     | 1 |
| Airn      | 0,352049 | 0,001833 | 0,002 | 0     | 1 |
| Rab44     | 0,352049 | 0,001833 | 0,002 | 0     | 1 |
| Tbc1d22bc | 0,352049 | 0,001833 | 0,002 | 0     | 1 |
| H2-DMb1   | 0,352049 | 0,001833 | 0,002 | 0     | 1 |
| Gm11131   | 0,352049 | 0,001833 | 0,002 | 0     | 1 |
| Plin5     | 0,352049 | 0,001833 | 0,002 | 0     | 1 |
| Gm4951    | 0,352049 | 0,001833 | 0,002 | 0     | 1 |
| Rnf165    | 0,352049 | 0,001833 | 0,002 | 0     | 1 |
| Slc14a1   | 0,352049 | 0,001833 | 0,002 | 0     | 1 |
| Fermt3    | 0,352049 | 0,001833 | 0,002 | 0     | 1 |
| Ms4a6d    | 0,352049 | 0,001833 | 0,002 | 0     | 1 |
| Mamdc2    | 0,352049 | 0,001833 | 0,002 | 0     | 1 |
| Fas       | 0,352049 | 0,001833 | 0,002 | 0     | 1 |
| Ifit1bl1  | 0,352049 | 0,001833 | 0,002 | 0     | 1 |
| Hhex      | 0,352049 | 0,001833 | 0,002 | 0     | 1 |
| Entpd1    | 0,352049 | 0,001833 | 0,002 | 0     | 1 |
| Klk9      | 0,352284 | 0,03116  | 0,064 | 0,051 | 1 |
| Donson    | 0,352479 | -0,00143 | 0,059 | 0,074 | 1 |
| Diexf     | 0,352536 | 0,004591 | 0,139 | 0,165 | 1 |
| Ifit3     | 0,352544 | 0,050023 | 0,015 | 0,008 | 1 |
| Pcdhgb6   | 0,352625 | -0,00426 | 0,024 | 0,034 | 1 |
| Nsun5     | 0,352686 | -0,00172 | 0,119 | 0,141 | 1 |
| Fgf11     | 0,352712 | -0,00248 | 0,022 | 0,032 | 1 |
| Tbc1d10b  | 0,352786 | 0,06102  | 0,75  | 0,787 | 1 |
| BC049715  | 0,352838 | 0,022313 | 0,015 | 0,008 | 1 |
| Pag1      | 0,35287  | -0,00233 | 0,211 | 0,241 | 1 |
| Ceacam2   | 0,352897 | -0,01175 | 0,042 | 0,055 | 1 |
| Rab26     | 0,353211 | -0,00452 | 0,024 | 0,034 | 1 |
| Daam2     | 0,353539 | 0,070537 | 0,921 | 0,924 | 1 |
| Rab40b    | 0,353777 | -0,00933 | 0,033 | 0,044 | 1 |
| Tmem209   | 0,353786 | -0,00128 | 0,261 | 0,291 | 1 |
| Tmem2     | 0,354022 | 0,013376 | 0,015 | 0,008 | 1 |
| Rasgef1b  | 0,354161 | 0,014033 | 0,081 | 0,099 | 1 |
| Ccdc85c   | 0,354223 | -0,0058  | 0,059 | 0,074 | 1 |
| Inpp4a    | 0,354673 | -0,01269 | 0,046 | 0,059 | 1 |
| Nsf       | 0,35477  | 0,022626 | 0,251 | 0,289 | 1 |
| Col2a1    | 0,354828 | -0,00933 | 0,028 | 0,038 | 1 |
| Casp2     | 0,354931 | 0,000823 | 0,117 | 0,139 | 1 |
| Stox2     | 0,355089 | 0,048311 | 0,839 | 0,873 | 1 |
| Ccdc3     | 0,355207 | 0,009779 | 0,015 | 0,008 | 1 |

|            |          |          |       |       |   |
|------------|----------|----------|-------|-------|---|
| Gm15892    | 0,355207 | 0,013376 | 0,015 | 0,008 | 1 |
| Gm26514    | 0,355207 | 0,011579 | 0,015 | 0,008 | 1 |
| Rab11fip5  | 0,3555   | 0,009897 | 0,04  | 0,03  | 1 |
| 50334060l  | 0,355543 | -0,00529 | 0,028 | 0,038 | 1 |
| Ccng1      | 0,356086 | 0,004497 | 0,303 | 0,344 | 1 |
| Map1s      | 0,356147 | 0,002128 | 0,292 | 0,325 | 1 |
| Gm49396    | 0,356395 | 0,009779 | 0,015 | 0,008 | 1 |
| Atg16l2    | 0,356466 | -0,00754 | 0,042 | 0,055 | 1 |
| 4931428Fc  | 0,356709 | -0,00409 | 0,057 | 0,072 | 1 |
| Rrs1       | 0,356795 | 0,003212 | 0,45  | 0,515 | 1 |
| Arf5       | 0,356864 | 0,048151 | 0,905 | 0,895 | 1 |
| Tmod3      | 0,35704  | -0,00529 | 0,262 | 0,295 | 1 |
| L2hgdh     | 0,357082 | -0,00605 | 0,042 | 0,055 | 1 |
| Ccdc88a    | 0,357182 | 0,059152 | 0,974 | 0,979 | 1 |
| Ero1l      | 0,357623 | 0,077451 | 0,369 | 0,361 | 1 |
| Trp53bp1   | 0,357675 | 0,04554  | 0,231 | 0,211 | 1 |
| St5        | 0,357853 | 0,083901 | 0,228 | 0,215 | 1 |
| Madd       | 0,357968 | -0,00729 | 0,044 | 0,057 | 1 |
| 2810405F1  | 0,358038 | -0,0058  | 0,04  | 0,053 | 1 |
| Yeats2     | 0,358046 | 0,076373 | 0,257 | 0,249 | 1 |
| Eif3b      | 0,358076 | 0,008015 | 0,549 | 0,618 | 1 |
| Zfp607a    | 0,358135 | -0,00187 | 0,044 | 0,057 | 1 |
| Dbf4       | 0,358149 | -0,00605 | 0,033 | 0,044 | 1 |
| St6galnac4 | 0,358507 | -0,00274 | 0,026 | 0,036 | 1 |
| Seh1l      | 0,358774 | 0,003951 | 0,237 | 0,272 | 1 |
| Bcat2      | 0,358902 | -0,00627 | 0,136 | 0,158 | 1 |
| Zbtb33     | 0,359011 | -0,00667 | 0,2   | 0,228 | 1 |
| Decr2      | 0,359012 | 0,04705  | 0,07  | 0,057 | 1 |
| Mpz        | 0,359084 | -0,11764 | 0,015 | 0,008 | 1 |
| Fam110a    | 0,35998  | 0,004079 | 0,015 | 0,008 | 1 |
| Paqr3      | 0,360014 | -0,00085 | 0,048 | 0,061 | 1 |
| Zfp940     | 0,360033 | -0,00629 | 0,048 | 0,061 | 1 |
| Smad5      | 0,360165 | 0,072596 | 0,376 | 0,378 | 1 |
| Kif18a     | 0,360178 | 0,02294  | 0,05  | 0,038 | 1 |
| Kif1b      | 0,36027  | 0,004458 | 1     | 0,998 | 1 |
| Zfp968     | 0,360506 | -0,00403 | 0,035 | 0,046 | 1 |
| Stx2       | 0,360508 | -0,0039  | 0,248 | 0,283 | 1 |
| Irs1       | 0,360803 | 0,033915 | 0,088 | 0,074 | 1 |
| Zbed3      | 0,361016 | -0,00605 | 0,035 | 0,046 | 1 |
| Slc38a6    | 0,361308 | -0,02488 | 0,244 | 0,268 | 1 |
| Sidt2      | 0,361622 | 0,072778 | 0,42  | 0,416 | 1 |
| Taf1c      | 0,361895 | 0,019954 | 0,075 | 0,061 | 1 |
| Pcdhb6     | 0,362199 | -0,0058  | 0,029 | 0,04  | 1 |
| Eapp       | 0,362247 | 0,001822 | 0,567 | 0,641 | 1 |
| Ccne2      | 0,362343 | -0,00709 | 0,006 | 0,011 | 1 |
| Cd300lf    | 0,362343 | -0,00709 | 0,006 | 0,011 | 1 |
| Gm10373    | 0,362343 | -0,00709 | 0,006 | 0,011 | 1 |
| Srpr       | 0,362885 | 0,02922  | 0,516 | 0,612 | 1 |
| Gm13610    | 0,363446 | -0,005   | 0,006 | 0,011 | 1 |
| Ankrd35    | 0,363446 | -0,005   | 0,006 | 0,011 | 1 |
| Dao        | 0,363446 | -0,005   | 0,006 | 0,011 | 1 |
| Gm43154    | 0,363446 | -0,005   | 0,006 | 0,011 | 1 |

|            |          |          |       |       |   |
|------------|----------|----------|-------|-------|---|
| Gm44739    | 0,363446 | -0,005   | 0,006 | 0,011 | 1 |
| Rgs10      | 0,363446 | -0,005   | 0,006 | 0,011 | 1 |
| Gm49353    | 0,363446 | -0,005   | 0,006 | 0,011 | 1 |
| Gm27030    | 0,363446 | -0,005   | 0,006 | 0,011 | 1 |
| 4732419C   | 0,363446 | -0,005   | 0,006 | 0,011 | 1 |
| Gng2       | 0,363446 | -0,005   | 0,006 | 0,011 | 1 |
| Duxbl1     | 0,363446 | -0,005   | 0,006 | 0,011 | 1 |
| Gm45606    | 0,363446 | -0,005   | 0,006 | 0,011 | 1 |
| Hmga1b     | 0,363446 | -0,005   | 0,006 | 0,011 | 1 |
| Dnmt3aos   | 0,363446 | -0,005   | 0,006 | 0,011 | 1 |
| Gm26513    | 0,363446 | -0,005   | 0,006 | 0,011 | 1 |
| 9330136K   | 0,363446 | -0,005   | 0,006 | 0,011 | 1 |
| Tll2       | 0,363446 | -0,005   | 0,006 | 0,011 | 1 |
| Pola1      | 0,363553 | 0,018646 | 0,141 | 0,167 | 1 |
| Pygm       | 0,363818 | -0,00735 | 0,006 | 0,011 | 1 |
| Fam20c     | 0,364044 | 0,001131 | 0,253 | 0,285 | 1 |
| Wwc1       | 0,364187 | -0,00527 | 0,006 | 0,011 | 1 |
| Syt16      | 0,364187 | -0,00527 | 0,006 | 0,011 | 1 |
| Rapgef3os2 | 0,364187 | -0,00527 | 0,006 | 0,011 | 1 |
| Stac2      | 0,364556 | 0,000183 | 0,006 | 0,011 | 1 |
| Gm13830    | 0,364799 | 0,016232 | 0,092 | 0,076 | 1 |
| Ankrd61    | 0,365061 | 0,008138 | 0,024 | 0,034 | 1 |
| Actr3b     | 0,365064 | 0,017198 | 0,042 | 0,032 | 1 |
| Txnrd3     | 0,365156 | 0,033328 | 0,061 | 0,049 | 1 |
| Slc6a20b   | 0,365293 | 0,002269 | 0,006 | 0,011 | 1 |
| Mgmt       | 0,365293 | -0,00136 | 0,006 | 0,011 | 1 |
| Gm38250    | 0,365293 | -0,00136 | 0,006 | 0,011 | 1 |
| Bag2       | 0,365293 | -0,00318 | 0,006 | 0,011 | 1 |
| St8sia4    | 0,365293 | -0,00318 | 0,006 | 0,011 | 1 |
| Gchfr      | 0,365293 | -0,00318 | 0,006 | 0,011 | 1 |
| Cdyl2      | 0,365293 | -0,00318 | 0,006 | 0,011 | 1 |
| Eno1b      | 0,365293 | -0,00318 | 0,006 | 0,011 | 1 |
| Tfpi       | 0,365295 | -0,00553 | 0,006 | 0,011 | 1 |
| Golga2     | 0,365362 | 0,006293 | 0,387 | 0,432 | 1 |
| Immt       | 0,365538 | 0,008475 | 0,761 | 0,825 | 1 |
| Ryk        | 0,36554  | 0,010347 | 0,49  | 0,551 | 1 |
| Sh2d6      | 0,366096 | -0,0033  | 0,037 | 0,049 | 1 |
| Arhgef11   | 0,366258 | 0,001909 | 0,169 | 0,196 | 1 |
| Amd1       | 0,366593 | 0,05521  | 0,85  | 0,84  | 1 |
| Ubxn11     | 0,366729 | 0,013685 | 0,028 | 0,019 | 1 |
| Rpl27a     | 0,367013 | 0,013686 | 1     | 0,994 | 1 |
| Casd1      | 0,367104 | 0,003417 | 0,24  | 0,272 | 1 |
| Myh10      | 0,367146 | -0,00136 | 0,006 | 0,011 | 1 |
| Ttf2       | 0,367146 | 0,002269 | 0,006 | 0,011 | 1 |
| Gm48678    | 0,367444 | 0,04705  | 0,035 | 0,025 | 1 |
| Ugdh       | 0,367988 | 0,119253 | 0,224 | 0,213 | 1 |
| Sft2d2     | 0,36801  | 0,018818 | 0,336 | 0,388 | 1 |
| Amz1       | 0,368668 | 0,010126 | 0,028 | 0,019 | 1 |
| Capzb      | 0,368943 | 0,060624 | 0,727 | 0,753 | 1 |
| D230017M   | 0,369    | 0,005549 | 0,029 | 0,04  | 1 |
| Wdr1       | 0,369086 | 0,021217 | 0,521 | 0,58  | 1 |
| Fads6      | 0,369168 | 0,056145 | 0,661 | 0,669 | 1 |

|           |          |          |       |       |   |
|-----------|----------|----------|-------|-------|---|
| Top3b     | 0,36998  | 0,01501  | 0,275 | 0,312 | 1 |
| Klhdc3    | 0,369999 | -0,00696 | 0,321 | 0,359 | 1 |
| Tor1aip1  | 0,370184 | 0,005439 | 0,653 | 0,724 | 1 |
| Ddx50     | 0,370203 | 0,076429 | 0,561 | 0,589 | 1 |
| Fads1     | 0,370393 | 0,064517 | 0,235 | 0,222 | 1 |
| Fbxl4     | 0,370559 | 0,000183 | 0,143 | 0,167 | 1 |
| Cbarp     | 0,371038 | 0,014279 | 0,035 | 0,025 | 1 |
| Psm11     | 0,371093 | 0,035453 | 0,783 | 0,795 | 1 |
| Ttyh1     | 0,371166 | -0,07778 | 0,306 | 0,333 | 1 |
| AA467197  | 0,371287 | 0,009552 | 0,028 | 0,019 | 1 |
| Rab12     | 0,371297 | 2,06E-05 | 0,099 | 0,118 | 1 |
| Xiap      | 0,371378 | 0,077119 | 0,626 | 0,66  | 1 |
| Ldlrad4   | 0,371575 | 0,073634 | 0,477 | 0,487 | 1 |
| Scamp5    | 0,371768 | 0,069024 | 0,765 | 0,776 | 1 |
| 3110045C: | 0,3721   | 0,006475 | 0,033 | 0,044 | 1 |
| Slc7a14   | 0,3727   | 0,014863 | 0,042 | 0,032 | 1 |
| Cercam    | 0,372769 | 0,04133  | 0,22  | 0,203 | 1 |
| Zfp11     | 0,372795 | 0,001395 | 0,046 | 0,059 | 1 |
| Epb4111   | 0,372878 | 0,085432 | 0,497 | 0,506 | 1 |
| Ppp2r5c   | 0,372886 | -0,00891 | 0,782 | 0,829 | 1 |
| Rock1     | 0,373462 | -0,01779 | 0,831 | 0,865 | 1 |
| Gan       | 0,373917 | 0,004407 | 0,273 | 0,31  | 1 |
| Tmem131   | 0,374455 | 0,059991 | 0,323 | 0,31  | 1 |
| Ttbk1     | 0,374601 | -0,00937 | 0,253 | 0,281 | 1 |
| Lyst      | 0,374606 | 0,01752  | 0,233 | 0,268 | 1 |
| Ccdc88c   | 0,374885 | 0,001812 | 0,05  | 0,063 | 1 |
| Loxl2     | 0,376035 | 0,0087   | 0,035 | 0,025 | 1 |
| Ap2a2     | 0,37654  | -0,00394 | 0,565 | 0,629 | 1 |
| Tmem176a  | 0,376581 | 0,017067 | 0,119 | 0,101 | 1 |
| Ly6g6f    | 0,376793 | -0,02373 | 0,389 | 0,435 | 1 |
| Gm2694    | 0,377003 | -0,02671 | 0,094 | 0,11  | 1 |
| Smurf1    | 0,377197 | 0,00444  | 0,171 | 0,198 | 1 |
| Sbf1      | 0,377675 | -0,01844 | 0,85  | 0,88  | 1 |
| Cd59a     | 0,377729 | -0,08506 | 0,505 | 0,449 | 1 |
| Gng7      | 0,377966 | 0,006102 | 0,609 | 0,694 | 1 |
| Tspyl5    | 0,378311 | 0,007746 | 0,057 | 0,044 | 1 |
| Spats2l   | 0,379129 | -0,01343 | 0,182 | 0,205 | 1 |
| Zfp595    | 0,379288 | -0,02241 | 0,094 | 0,11  | 1 |
| Lrrc45    | 0,380444 | -0,00154 | 0,174 | 0,198 | 1 |
| Stim2     | 0,38105  | 0,004522 | 0,198 | 0,228 | 1 |
| Aldh16a1  | 0,381075 | -0,00696 | 0,127 | 0,148 | 1 |
| Trim37    | 0,381161 | -0,00914 | 0,139 | 0,16  | 1 |
| Ppp1r12b  | 0,381382 | 0,018646 | 0,198 | 0,23  | 1 |
| Rab33b    | 0,38144  | 0,008036 | 0,514 | 0,568 | 1 |
| Rpl14     | 0,381732 | 0,00747  | 0,994 | 0,996 | 1 |
| Klf3      | 0,381879 | 0,075835 | 0,589 | 0,608 | 1 |
| A930003A: | 0,38272  | -0,00746 | 0,086 | 0,103 | 1 |
| Ipo9      | 0,382832 | 0,052362 | 0,299 | 0,287 | 1 |
| Rps6ka3   | 0,382857 | 0,039623 | 0,132 | 0,116 | 1 |
| Map1b     | 0,383587 | 0,02889  | 0,87  | 0,808 | 1 |
| Cenpo     | 0,383613 | -0,00943 | 0,072 | 0,086 | 1 |
| Ppp4c     | 0,383655 | 0,084634 | 0,429 | 0,428 | 1 |

|           |          |          |       |       |   |
|-----------|----------|----------|-------|-------|---|
| Pcdhga12  | 0,383675 | -0,01026 | 0,171 | 0,194 | 1 |
| Rabep1    | 0,383765 | 0,024211 | 0,44  | 0,508 | 1 |
| Chmp3     | 0,383774 | 0,014138 | 0,569 | 0,652 | 1 |
| Cpsf2     | 0,383805 | 0,007769 | 0,207 | 0,238 | 1 |
| Clp1      | 0,383984 | 0,009652 | 0,138 | 0,162 | 1 |
| Mboat1    | 0,384774 | 0,013682 | 0,411 | 0,477 | 1 |
| Snrpb     | 0,385277 | 0,043509 | 0,894 | 0,895 | 1 |
| St3gal1   | 0,386089 | 0,033949 | 0,114 | 0,097 | 1 |
| Tsen54    | 0,38616  | -0,0126  | 0,07  | 0,084 | 1 |
| Slc38a10  | 0,386317 | 0,05966  | 0,558 | 0,58  | 1 |
| Med13l    | 0,386346 | 0,019077 | 0,406 | 0,447 | 1 |
| Foxp4     | 0,38649  | 0,03699  | 0,112 | 0,097 | 1 |
| Ttyh3     | 0,386818 | -0,0056  | 0,134 | 0,154 | 1 |
| Olfml2b   | 0,386995 | 0,018605 | 0,231 | 0,209 | 1 |
| Pex10     | 0,387006 | -0,0093  | 0,105 | 0,122 | 1 |
| Vash2     | 0,387038 | 0,007025 | 0,006 | 0,002 | 1 |
| Irs3      | 0,387038 | 0,007025 | 0,006 | 0,002 | 1 |
| Zic3      | 0,387038 | 0,012465 | 0,006 | 0,002 | 1 |
| Gm42851   | 0,387038 | 0,008842 | 0,006 | 0,002 | 1 |
| Adra1a    | 0,387038 | 0,008842 | 0,006 | 0,002 | 1 |
| Pomgnt2   | 0,387042 | -0,0195  | 0,09  | 0,105 | 1 |
| Sec16a    | 0,387126 | 0,020052 | 0,242 | 0,276 | 1 |
| U2af2     | 0,387373 | 0,092035 | 0,591 | 0,635 | 1 |
| Dpagt1    | 0,387555 | 0,013783 | 0,117 | 0,139 | 1 |
| Syt6      | 0,387578 | 0,013972 | 0,006 | 0,002 | 1 |
| Cited1    | 0,387578 | 0,008842 | 0,006 | 0,002 | 1 |
| Gm26762   | 0,387578 | 0,007025 | 0,006 | 0,002 | 1 |
| Gm26583   | 0,387578 | 0,007025 | 0,006 | 0,002 | 1 |
| Gm5475    | 0,387578 | 0,007025 | 0,006 | 0,002 | 1 |
| Cldn8     | 0,387578 | 0,007025 | 0,006 | 0,002 | 1 |
| Gm38336   | 0,387578 | 0,005205 | 0,006 | 0,002 | 1 |
| Sardh     | 0,387578 | 0,005205 | 0,006 | 0,002 | 1 |
| 4930502E1 | 0,387578 | 0,005205 | 0,006 | 0,002 | 1 |
| Fgf13     | 0,387578 | 0,005205 | 0,006 | 0,002 | 1 |
| Ptgfrn    | 0,387578 | 0,005205 | 0,006 | 0,002 | 1 |
| Lpar3     | 0,387578 | 0,005205 | 0,006 | 0,002 | 1 |
| Slc8a2    | 0,387578 | 0,005205 | 0,006 | 0,002 | 1 |
| AU020206  | 0,387578 | 0,005205 | 0,006 | 0,002 | 1 |
| Tnfrsf23  | 0,387578 | 0,005205 | 0,006 | 0,002 | 1 |
| Phxr2     | 0,387578 | 0,005205 | 0,006 | 0,002 | 1 |
| Gm39228   | 0,387578 | 0,005205 | 0,006 | 0,002 | 1 |
| Gm26521   | 0,387578 | 0,005205 | 0,006 | 0,002 | 1 |
| Gm47232   | 0,387578 | 0,005205 | 0,006 | 0,002 | 1 |
| Lrrc2     | 0,387578 | 0,005205 | 0,006 | 0,002 | 1 |
| Gm12264   | 0,387578 | 0,005205 | 0,006 | 0,002 | 1 |
| Gm43951   | 0,387578 | 0,005205 | 0,006 | 0,002 | 1 |
| Serpinf2  | 0,387578 | 0,005205 | 0,006 | 0,002 | 1 |
| Wfdc17    | 0,387578 | 0,005205 | 0,006 | 0,002 | 1 |
| Gpx2      | 0,387578 | 0,005205 | 0,006 | 0,002 | 1 |
| Fam71d    | 0,387578 | 0,005205 | 0,006 | 0,002 | 1 |
| Fam69c    | 0,387578 | 0,005205 | 0,006 | 0,002 | 1 |
| Chmp2a    | 0,38801  | -0,01171 | 0,963 | 0,956 | 1 |



|           |          |          |       |       |   |
|-----------|----------|----------|-------|-------|---|
| Mybph     | 0,388119 | 0,003382 | 0,006 | 0,002 | 1 |
| Grin1     | 0,388119 | 0,003382 | 0,006 | 0,002 | 1 |
| Olfr1122  | 0,388119 | 0,003382 | 0,006 | 0,002 | 1 |
| Olfr1260  | 0,388119 | 0,003382 | 0,006 | 0,002 | 1 |
| Grem1     | 0,388119 | 0,003382 | 0,006 | 0,002 | 1 |
| Gm17096   | 0,388119 | 0,003382 | 0,006 | 0,002 | 1 |
| Xlr3a     | 0,388119 | 0,003382 | 0,006 | 0,002 | 1 |
| Tmem35a   | 0,388119 | 0,003382 | 0,006 | 0,002 | 1 |
| Gm15298   | 0,388119 | 0,003382 | 0,006 | 0,002 | 1 |
| Dcst2     | 0,388119 | 0,003382 | 0,006 | 0,002 | 1 |
| Gm42681   | 0,388119 | 0,003382 | 0,006 | 0,002 | 1 |
| I830077J0 | 0,388119 | 0,003382 | 0,006 | 0,002 | 1 |
| Dennd2d   | 0,388119 | 0,003382 | 0,006 | 0,002 | 1 |
| Aqp7      | 0,388119 | 0,003382 | 0,006 | 0,002 | 1 |
| Mycl      | 0,388119 | 0,003382 | 0,006 | 0,002 | 1 |
| Angptl7   | 0,388119 | 0,003382 | 0,006 | 0,002 | 1 |
| Cort      | 0,388119 | 0,003382 | 0,006 | 0,002 | 1 |
| Gbp6      | 0,388119 | 0,003382 | 0,006 | 0,002 | 1 |
| Rph3a     | 0,388119 | 0,003382 | 0,006 | 0,002 | 1 |
| A430078I0 | 0,388119 | 0,003382 | 0,006 | 0,002 | 1 |
| Vmn1r76   | 0,388119 | 0,003382 | 0,006 | 0,002 | 1 |
| Gm9844    | 0,388119 | 0,003382 | 0,006 | 0,002 | 1 |
| Nphs1     | 0,388119 | 0,003382 | 0,006 | 0,002 | 1 |
| Igflr1    | 0,388119 | 0,003382 | 0,006 | 0,002 | 1 |
| Olfr571   | 0,388119 | 0,003382 | 0,006 | 0,002 | 1 |
| I810010D0 | 0,388119 | 0,003382 | 0,006 | 0,002 | 1 |
| B230208H0 | 0,388119 | 0,003382 | 0,006 | 0,002 | 1 |
| Ppil6     | 0,388119 | 0,003382 | 0,006 | 0,002 | 1 |
| Gm10778   | 0,388119 | 0,003382 | 0,006 | 0,002 | 1 |
| Gm31182   | 0,388119 | 0,003382 | 0,006 | 0,002 | 1 |
| Itga7     | 0,388119 | 0,003382 | 0,006 | 0,002 | 1 |
| Isyna1    | 0,388119 | 0,003382 | 0,006 | 0,002 | 1 |
| Ankle1    | 0,388119 | 0,003382 | 0,006 | 0,002 | 1 |
| D030051J2 | 0,388119 | 0,003382 | 0,006 | 0,002 | 1 |
| Mmrn2     | 0,388119 | 0,003382 | 0,006 | 0,002 | 1 |
| Olfr905   | 0,388119 | 0,003382 | 0,006 | 0,002 | 1 |
| Fxyd2     | 0,388119 | 0,003382 | 0,006 | 0,002 | 1 |
| Plet1os   | 0,388119 | 0,003382 | 0,006 | 0,002 | 1 |
| Gm10658   | 0,388119 | 0,003382 | 0,006 | 0,002 | 1 |
| 9630041A0 | 0,388119 | 0,003382 | 0,006 | 0,002 | 1 |
| Gm33054   | 0,388119 | 0,003382 | 0,006 | 0,002 | 1 |
| A730085K0 | 0,388119 | 0,003382 | 0,006 | 0,002 | 1 |
| Nxn       | 0,388119 | 0,003382 | 0,006 | 0,002 | 1 |
| Eme1      | 0,388119 | 0,003382 | 0,006 | 0,002 | 1 |
| Gm9796    | 0,388119 | 0,003382 | 0,006 | 0,002 | 1 |
| AK157302  | 0,388119 | 0,003382 | 0,006 | 0,002 | 1 |
| Gm38604   | 0,388119 | 0,003382 | 0,006 | 0,002 | 1 |
| 4931403G0 | 0,388119 | 0,003382 | 0,006 | 0,002 | 1 |
| Gdnf      | 0,388119 | 0,003382 | 0,006 | 0,002 | 1 |
| Car15     | 0,388119 | 0,003382 | 0,006 | 0,002 | 1 |
| AC126280. | 0,388119 | 0,003382 | 0,006 | 0,002 | 1 |
| Gm9968    | 0,388119 | 0,003382 | 0,006 | 0,002 | 1 |

|           |          |          |       |       |   |
|-----------|----------|----------|-------|-------|---|
| Angptl4   | 0,388119 | 0,003382 | 0,006 | 0,002 | 1 |
| Colec12   | 0,388119 | 0,003382 | 0,006 | 0,002 | 1 |
| Chsy3     | 0,388119 | 0,003382 | 0,006 | 0,002 | 1 |
| Gm16541   | 0,388119 | 0,003382 | 0,006 | 0,002 | 1 |
| Col17a1   | 0,388119 | 0,003382 | 0,006 | 0,002 | 1 |
| Slc25a13  | 0,388251 | 0,076831 | 0,42  | 0,418 | 1 |
| Ppp2r2c   | 0,388421 | 0,069576 | 0,901 | 0,895 | 1 |
| Pcgf2     | 0,388662 | 0,004922 | 0,006 | 0,002 | 1 |
| Slc25a2   | 0,388662 | 0,004922 | 0,006 | 0,002 | 1 |
| Uba52     | 0,388768 | 0,071389 | 0,765 | 0,764 | 1 |
| Bcl9      | 0,388915 | 0,035765 | 0,402 | 0,47  | 1 |
| Ythdf3    | 0,388917 | -0,00445 | 0,394 | 0,435 | 1 |
| Pdpk1     | 0,388952 | 0,028606 | 0,385 | 0,445 | 1 |
| Dhx37     | 0,389149 | 0,005173 | 0,149 | 0,173 | 1 |
| Nusap1    | 0,389204 | 0,003102 | 0,006 | 0,002 | 1 |
| Reln      | 0,389204 | 0,006169 | 0,006 | 0,002 | 1 |
| Ccdc141   | 0,389489 | -0,00735 | 0,007 | 0,013 | 1 |
| Cetn4     | 0,389489 | -0,00735 | 0,007 | 0,013 | 1 |
| Mpeg1     | 0,389489 | -0,0115  | 0,007 | 0,013 | 1 |
| Rasgrp3   | 0,389688 | 0,069122 | 0,807 | 0,789 | 1 |
| A930003O  | 0,389747 | 0,001279 | 0,006 | 0,002 | 1 |
| Tex15     | 0,389747 | 0,001279 | 0,006 | 0,002 | 1 |
| Slc5a10   | 0,389747 | 0,001279 | 0,006 | 0,002 | 1 |
| AC159200. | 0,389747 | 0,001279 | 0,006 | 0,002 | 1 |
| Tgfbr2    | 0,389747 | -0,00291 | 0,006 | 0,002 | 1 |
| Adam22    | 0,389887 | 0,021352 | 0,433 | 0,492 | 1 |
| Rab1b     | 0,39011  | 0,060548 | 0,648 | 0,681 | 1 |
| Samd14    | 0,390394 | 0,012491 | 0,022 | 0,015 | 1 |
| Sh2b1     | 0,390607 | 0,046277 | 0,266 | 0,249 | 1 |
| Plxnb3    | 0,39062  | 0,048163 | 0,694 | 0,7   | 1 |
| D330050G  | 0,390866 | -0,00527 | 0,007 | 0,013 | 1 |
| Cenpi     | 0,390866 | -0,00527 | 0,007 | 0,013 | 1 |
| 1700015F1 | 0,390866 | -0,00527 | 0,007 | 0,013 | 1 |
| Rarres2   | 0,390866 | -0,00527 | 0,007 | 0,013 | 1 |
| 1700069B  | 0,390866 | -0,00527 | 0,007 | 0,013 | 1 |
| Gm20163   | 0,390866 | -0,00527 | 0,007 | 0,013 | 1 |
| Pelo      | 0,390866 | -0,00527 | 0,007 | 0,013 | 1 |
| Gm48796   | 0,391215 | -0,00968 | 0,007 | 0,013 | 1 |
| Nsa2      | 0,391401 | 0,002738 | 0,699 | 0,73  | 1 |
| Gm17146   | 0,391601 | 0,020458 | 0,029 | 0,021 | 1 |
| Tcf7l1    | 0,39191  | 0,011616 | 0,022 | 0,015 | 1 |
| Prr7      | 0,392152 | 0,012491 | 0,022 | 0,015 | 1 |
| Tet2      | 0,392439 | 0,016048 | 0,29  | 0,335 | 1 |
| Kctd9     | 0,392782 | 0,027185 | 0,121 | 0,105 | 1 |
| Rhoq      | 0,392922 | -0,00029 | 0,25  | 0,285 | 1 |
| Fcer1g    | 0,392942 | 0,001993 | 0,007 | 0,013 | 1 |
| AC154782. | 0,392942 | 0,001993 | 0,007 | 0,013 | 1 |
| BC030343  | 0,392942 | -0,00163 | 0,007 | 0,013 | 1 |
| Nespas    | 0,392942 | -0,00345 | 0,007 | 0,013 | 1 |
| Fam196b   | 0,392942 | -0,00345 | 0,007 | 0,013 | 1 |
| Gm30198   | 0,392942 | -0,00345 | 0,007 | 0,013 | 1 |
| Mkx       | 0,392942 | -0,00345 | 0,007 | 0,013 | 1 |

|                           |          |          |       |       |   |
|---------------------------|----------|----------|-------|-------|---|
| Otud1                     | 0,393566 | -0,01453 | 0,097 | 0,114 | 1 |
| Cxcr4                     | 0,393672 | 0,008342 | 0,022 | 0,015 | 1 |
| Slc17a9                   | 0,39376  | 0,016931 | 0,029 | 0,021 | 1 |
| Grtp1                     | 0,393914 | 0,007119 | 0,022 | 0,015 | 1 |
| Gt(ROSA)26 <sup>cre</sup> | 0,393925 | 0,004209 | 0,022 | 0,015 | 1 |
| Gm29237                   | 0,393984 | -8,8E-05 | 0,007 | 0,013 | 1 |
| Acp6                      | 0,394004 | 0,004128 | 0,128 | 0,15  | 1 |
| Sipa1l1                   | 0,394554 | 0,019602 | 0,079 | 0,065 | 1 |
| Nos3                      | 0,395024 | -0,00163 | 0,007 | 0,013 | 1 |
| Gm26852                   | 0,395024 | -0,00163 | 0,007 | 0,013 | 1 |
| Mettl7a3                  | 0,395024 | 0,000183 | 0,007 | 0,013 | 1 |
| Mief2                     | 0,395314 | -0,01242 | 0,099 | 0,116 | 1 |
| Sppl3                     | 0,395438 | 0,088458 | 0,415 | 0,428 | 1 |
| 5033417F2                 | 0,395447 | 0,013116 | 0,044 | 0,034 | 1 |
| Zfp622                    | 0,395572 | 0,017549 | 0,251 | 0,287 | 1 |
| Crat                      | 0,395594 | -0,00086 | 0,25  | 0,281 | 1 |
| Zbtb14                    | 0,396522 | -0,00238 | 0,116 | 0,135 | 1 |
| Ccdc39                    | 0,396523 | -0,00106 | 0,079 | 0,095 | 1 |
| Rpusd1                    | 0,396737 | -0,02075 | 0,09  | 0,105 | 1 |
| Lmf2                      | 0,396775 | 0,005562 | 0,281 | 0,316 | 1 |
| Brd9                      | 0,396803 | 0,048785 | 0,708 | 0,711 | 1 |
| Hook1                     | 0,397112 | 0,000183 | 0,007 | 0,013 | 1 |
| Mier3                     | 0,397365 | 0,045257 | 0,24  | 0,226 | 1 |
| AC163032                  | 0,397523 | 0,011032 | 0,138 | 0,16  | 1 |
| lspd                      | 0,397536 | -0,00246 | 0,182 | 0,207 | 1 |
| Eif2ak2                   | 0,397582 | 0,002717 | 0,044 | 0,034 | 1 |
| Cmah                      | 0,397801 | 0,020615 | 0,053 | 0,042 | 1 |
| Anapc7                    | 0,397993 | -0,00884 | 0,305 | 0,335 | 1 |
| Vopp1                     | 0,3981   | 0,013391 | 0,029 | 0,021 | 1 |
| 270001212                 | 0,3981   | 0,013391 | 0,029 | 0,021 | 1 |
| Fer                       | 0,398187 | 0,003185 | 0,2   | 0,228 | 1 |
| Ube2k                     | 0,398374 | 0,005681 | 0,648 | 0,711 | 1 |
| Morc2a                    | 0,398414 | 0,043335 | 0,183 | 0,167 | 1 |
| Arl8b                     | 0,398436 | 0,040741 | 0,787 | 0,797 | 1 |
| Scaf1                     | 0,39848  | 0,021738 | 0,519 | 0,595 | 1 |
| Nbn                       | 0,398573 | 0,000568 | 0,147 | 0,169 | 1 |
| Nus1                      | 0,398844 | 0,035236 | 0,4   | 0,475 | 1 |
| Bmp1                      | 0,398902 | 0,050255 | 0,27  | 0,253 | 1 |
| Abcb1b                    | 0,398981 | 0,016632 | 0,029 | 0,021 | 1 |
| Ank3                      | 0,399118 | -0,00365 | 0,987 | 0,987 | 1 |
| Trir                      | 0,39922  | -0,01111 | 0,732 | 0,787 | 1 |
| Pip4k2c                   | 0,399711 | 0,047601 | 0,429 | 0,418 | 1 |
| Mtss1l                    | 0,400897 | 0,049785 | 0,18  | 0,165 | 1 |
| Nphp1                     | 0,400988 | -0,00124 | 0,073 | 0,089 | 1 |
| Ptar1                     | 0,401019 | -0,00855 | 0,127 | 0,146 | 1 |
| Prkag2                    | 0,401078 | 0,012228 | 0,037 | 0,027 | 1 |
| Sh3pxd2b                  | 0,4011   | 0,009614 | 0,044 | 0,034 | 1 |
| Pcyox1                    | 0,401832 | 0,063388 | 0,464 | 0,466 | 1 |
| G3bp2                     | 0,402203 | 0,054396 | 0,794 | 0,812 | 1 |
| Phc2                      | 0,402236 | -0,00754 | 0,837 | 0,848 | 1 |
| Ankrd13b                  | 0,402308 | 0,054405 | 0,35  | 0,34  | 1 |
| Usb1                      | 0,402857 | -0,00726 | 0,066 | 0,08  | 1 |

|          |          |          |       |       |   |
|----------|----------|----------|-------|-------|---|
| Hmox1    | 0,403067 | 0,034406 | 0,134 | 0,118 | 1 |
| 91300190 | 0,403148 | 0,021732 | 0,053 | 0,042 | 1 |
| Exoc4    | 0,403213 | 0,020934 | 0,481 | 0,555 | 1 |
| Ctcf     | 0,403282 | 0,058491 | 0,717 | 0,724 | 1 |
| Pcmttd1  | 0,403302 | 0,038382 | 0,813 | 0,816 | 1 |
| Plbd2    | 0,403398 | 0,018836 | 0,402 | 0,462 | 1 |
| Tiam1    | 0,404396 | -0,02095 | 0,055 | 0,068 | 1 |
| Hsf2     | 0,404481 | 0,012459 | 0,215 | 0,243 | 1 |
| Sord     | 0,404493 | 0,014572 | 0,125 | 0,108 | 1 |
| Rgs20    | 0,40456  | 0,025547 | 0,017 | 0,011 | 1 |
| Fam109a  | 0,404609 | -0,01531 | 0,092 | 0,108 | 1 |
| March6   | 0,404795 | 0,067368 | 0,402 | 0,397 | 1 |
| Sept10   | 0,404979 | -0,00428 | 0,253 | 0,283 | 1 |
| Pigb     | 0,405156 | -0,0032  | 0,083 | 0,099 | 1 |
| Atp6v0c  | 0,405307 | -0,01072 | 0,059 | 0,072 | 1 |
| Olig2    | 0,405315 | 0,007053 | 0,793 | 0,728 | 1 |
| Antxr1   | 0,405521 | 0,0015   | 0,086 | 0,103 | 1 |
| Tgfr1    | 0,405555 | 0,061399 | 0,224 | 0,211 | 1 |
| Enpp4    | 0,40584  | 0,039359 | 0,943 | 0,918 | 1 |
| Eif4g1   | 0,405944 | 0,054046 | 0,739 | 0,77  | 1 |
| Ckap5    | 0,405945 | 0,001202 | 0,787 | 0,812 | 1 |
| Cbfa2t2  | 0,405965 | 0,006952 | 0,239 | 0,27  | 1 |
| Syt15    | 0,405994 | 0,007774 | 0,029 | 0,021 | 1 |
| Zc3h11a  | 0,406221 | 0,023135 | 0,09  | 0,076 | 1 |
| Lrrc49   | 0,406254 | 0,041715 | 0,281 | 0,264 | 1 |
| Tbxas1   | 0,406362 | -0,01587 | 0,009 | 0,015 | 1 |
| Zfp292   | 0,406438 | 0,060991 | 0,521 | 0,519 | 1 |
| Lrwd1    | 0,406874 | -0,0216  | 0,136 | 0,154 | 1 |
| Stub1    | 0,406936 | -0,00132 | 0,712 | 0,764 | 1 |
| Cryz     | 0,407066 | 0,024087 | 0,112 | 0,097 | 1 |
| Atl2     | 0,407479 | 0,033322 | 0,161 | 0,146 | 1 |
| Gspt1    | 0,407877 | -0,01694 | 0,732 | 0,755 | 1 |
| Ift172   | 0,407926 | -0,008   | 0,158 | 0,179 | 1 |
| Rad52    | 0,407945 | -0,00652 | 0,097 | 0,114 | 1 |
| Rsad1    | 0,408116 | 0,031857 | 0,084 | 0,072 | 1 |
| Cdc37    | 0,408332 | 0,039196 | 0,848 | 0,857 | 1 |
| Crip1    | 0,408351 | -0,06244 | 0,139 | 0,158 | 1 |
| Gnl2     | 0,408605 | 0,025106 | 0,356 | 0,409 | 1 |
| Mvb12b   | 0,409308 | -0,01351 | 0,657 | 0,7   | 1 |
| Kif24    | 0,409593 | -0,00553 | 0,009 | 0,015 | 1 |
| Lrrd1    | 0,409593 | -0,00553 | 0,009 | 0,015 | 1 |
| Zfp459   | 0,409593 | -0,00553 | 0,009 | 0,015 | 1 |
| Zfp97    | 0,410247 | -0,00579 | 0,009 | 0,015 | 1 |
| Pigo     | 0,410276 | -0,0046  | 0,068 | 0,082 | 1 |
| Trip10   | 0,410548 | 0,01487  | 0,017 | 0,011 | 1 |
| Sepsecs  | 0,410732 | 0,005892 | 0,145 | 0,167 | 1 |
| Rxra     | 0,411242 | 0,012033 | 0,079 | 0,065 | 1 |
| Myo19    | 0,411454 | 0,012785 | 0,017 | 0,011 | 1 |
| Shcbp1l  | 0,411558 | -0,00957 | 0,092 | 0,108 | 1 |
| Armc2    | 0,41187  | -8,8E-05 | 0,009 | 0,015 | 1 |
| Vmn2r97  | 0,41187  | -0,0019  | 0,009 | 0,015 | 1 |
| Gm28836  | 0,41187  | -0,00371 | 0,009 | 0,015 | 1 |

|           |          |          |       |       |   |
|-----------|----------|----------|-------|-------|---|
| Gm20632   | 0,41187  | -0,00371 | 0,009 | 0,015 | 1 |
| Gm13166   | 0,41187  | -0,00371 | 0,009 | 0,015 | 1 |
| Gm11696   | 0,41187  | -0,00371 | 0,009 | 0,015 | 1 |
| Gm26836   | 0,412052 | 0,009489 | 0,017 | 0,011 | 1 |
| 1700056N  | 0,412052 | 0,01487  | 0,017 | 0,011 | 1 |
| Entpd7    | 0,412417 | 0,028073 | 0,092 | 0,078 | 1 |
| Ciz1      | 0,412512 | 0,020214 | 0,222 | 0,253 | 1 |
| Birc3     | 0,412525 | -0,00397 | 0,009 | 0,015 | 1 |
| Bicd1     | 0,412542 | 0,035807 | 0,655 | 0,66  | 1 |
| Copb1     | 0,412857 | 0,014876 | 0,545 | 0,633 | 1 |
| Extl3     | 0,412906 | -0,00549 | 0,295 | 0,321 | 1 |
| Sox6      | 0,413178 | -0,00424 | 0,009 | 0,015 | 1 |
| Fam221b   | 0,41356  | 0,007689 | 0,017 | 0,011 | 1 |
| Usp40     | 0,413753 | 0,02323  | 0,317 | 0,361 | 1 |
| BC037039  | 0,414153 | -0,0019  | 0,009 | 0,015 | 1 |
| Dnmbp     | 0,414153 | -8,8E-05 | 0,009 | 0,015 | 1 |
| Acvr2a    | 0,414419 | -0,00605 | 0,099 | 0,116 | 1 |
| Mpzl3     | 0,414472 | 0,018137 | 0,017 | 0,011 | 1 |
| Slc4a11   | 0,414774 | 0,007404 | 0,017 | 0,011 | 1 |
| Pcbp4     | 0,414927 | 0,030725 | 0,994 | 0,989 | 1 |
| Rpl4      | 0,415035 | 0,047133 | 0,983 | 0,983 | 1 |
| Txk       | 0,41507  | 0,005886 | 0,017 | 0,011 | 1 |
| Zfp423    | 0,41507  | 0,005886 | 0,017 | 0,011 | 1 |
| Appbp2os  | 0,41507  | 0,005886 | 0,017 | 0,011 | 1 |
| Trim32    | 0,415313 | 0,001817 | 0,286 | 0,321 | 1 |
| AC162302. | 0,415353 | 0,011688 | 0,053 | 0,042 | 1 |
| Usp13     | 0,415571 | 0,019245 | 0,039 | 0,03  | 1 |
| Ptpn9     | 0,415581 | -0,01109 | 0,119 | 0,137 | 1 |
| Slc35e1   | 0,415761 | -0,00143 | 0,202 | 0,228 | 1 |
| Atf5      | 0,41599  | 0,020877 | 0,24  | 0,276 | 1 |
| Sema4d    | 0,41625  | -0,0244  | 0,989 | 0,966 | 1 |
| Rptor     | 0,416507 | 0,048042 | 0,242 | 0,228 | 1 |
| Tbrg4     | 0,416732 | -0,00274 | 0,152 | 0,173 | 1 |
| Sacs      | 0,417287 | 0,009377 | 0,158 | 0,181 | 1 |
| Gk5       | 0,417388 | 0,000425 | 0,103 | 0,12  | 1 |
| Rhot2     | 0,418017 | 0,048132 | 0,226 | 0,213 | 1 |
| Zfp275    | 0,418226 | 0,007475 | 0,22  | 0,249 | 1 |
| Rnf185    | 0,418302 | -0,01283 | 0,141 | 0,16  | 1 |
| Grcc10    | 0,418353 | 0,01885  | 0,473 | 0,542 | 1 |
| Bax       | 0,41838  | 0,005292 | 0,697 | 0,755 | 1 |
| Ppfbp1    | 0,418632 | 0,02884  | 0,073 | 0,061 | 1 |
| Adgrg2    | 0,418702 | 0,031322 | 0,055 | 0,044 | 1 |
| Pcid2     | 0,418843 | 0,007392 | 0,246 | 0,278 | 1 |
| Cald1     | 0,418954 | -0,00212 | 0,512 | 0,568 | 1 |
| 2210406O  | 0,419462 | 0,020688 | 0,039 | 0,03  | 1 |
| Nat6      | 0,419988 | -0,00019 | 0,171 | 0,194 | 1 |
| Ctdsp1    | 0,420073 | 0,058077 | 0,422 | 0,424 | 1 |
| Serpinc1  | 0,420228 | 0,023662 | 0,031 | 0,023 | 1 |
| Rbm4b     | 0,420624 | 0,090227 | 0,448 | 0,458 | 1 |
| Slc7a6os  | 0,420642 | 0,035257 | 0,2   | 0,184 | 1 |
| Gm26870   | 0,420681 | 0,475268 | 0,011 | 0,006 | 1 |
| Xntrpc    | 0,420852 | -0,00786 | 0,011 | 0,017 | 1 |

|           |          |          |       |       |   |
|-----------|----------|----------|-------|-------|---|
| Pcdhga3   | 0,420852 | -0,00786 | 0,011 | 0,017 | 1 |
| Rpl10-ps3 | 0,420912 | 0,002537 | 0,228 | 0,253 | 1 |
| Ppm1b     | 0,421069 | 0,017979 | 0,488 | 0,568 | 1 |
| Acp2      | 0,421693 | 0,008842 | 0,288 | 0,319 | 1 |
| Frs2      | 0,421739 | -0,00491 | 0,286 | 0,316 | 1 |
| Vps13d    | 0,422502 | 0,056273 | 0,268 | 0,259 | 1 |
| Zfp335os  | 0,422684 | -0,00579 | 0,011 | 0,017 | 1 |
| Gm15283   | 0,422684 | -0,00579 | 0,011 | 0,017 | 1 |
| Gm26789   | 0,422709 | 0,022837 | 0,024 | 0,017 | 1 |
| A230083N  | 0,422962 | 0,01007  | 0,011 | 0,006 | 1 |
| Gm35339   | 0,422962 | 0,01007  | 0,011 | 0,006 | 1 |
| Gm35315   | 0,422995 | -0,01018 | 0,011 | 0,017 | 1 |
| Abl1      | 0,423037 | 0,053325 | 0,622 | 0,635 | 1 |
| P3h1      | 0,423123 | -0,00827 | 0,051 | 0,063 | 1 |
| Lgals1    | 0,423214 | 0,024285 | 0,024 | 0,017 | 1 |
| Bclaf3    | 0,423336 | 0,08576  | 0,294 | 0,289 | 1 |
| Fgd4      | 0,423353 | 0,058709 | 0,226 | 0,209 | 1 |
| Ccdc106   | 0,424105 | 0,008263 | 0,011 | 0,006 | 1 |
| Gm20075   | 0,424105 | 0,008263 | 0,011 | 0,006 | 1 |
| Gdf15     | 0,424105 | 0,013673 | 0,011 | 0,006 | 1 |
| Gm26538   | 0,424105 | 0,013673 | 0,011 | 0,006 | 1 |
| Magee2    | 0,424105 | 0,01007  | 0,011 | 0,006 | 1 |
| Gabrd     | 0,424105 | 0,01007  | 0,011 | 0,006 | 1 |
| Lmln      | 0,424231 | -0,00022 | 0,095 | 0,112 | 1 |
| Helq      | 0,424288 | -0,01341 | 0,088 | 0,103 | 1 |
| Sox9      | 0,424489 | 0,01517  | 0,011 | 0,006 | 1 |
| Mfsd11    | 0,424689 | 0,027694 | 0,347 | 0,401 | 1 |
| Elf1      | 0,42489  | 0,027588 | 0,29  | 0,331 | 1 |
| Clec11a   | 0,42514  | -0,00216 | 0,011 | 0,017 | 1 |
| Gm14167   | 0,42514  | -0,00397 | 0,011 | 0,017 | 1 |
| Pdpr      | 0,425168 | 0,027909 | 0,125 | 0,11  | 1 |
| Hist2h2ac | 0,42525  | 0,008263 | 0,011 | 0,006 | 1 |
| Capg      | 0,42525  | 0,008263 | 0,011 | 0,006 | 1 |
| Gm21917   | 0,42525  | 0,008263 | 0,011 | 0,006 | 1 |
| Hpgds     | 0,42525  | 0,006453 | 0,011 | 0,006 | 1 |
| Plaur     | 0,42525  | 0,006453 | 0,011 | 0,006 | 1 |
| 4732496C  | 0,42525  | 0,006453 | 0,011 | 0,006 | 1 |
| Emid1     | 0,42525  | 0,006453 | 0,011 | 0,006 | 1 |
| Pnma1     | 0,42525  | 0,006453 | 0,011 | 0,006 | 1 |
| Gm16279   | 0,42525  | 0,006453 | 0,011 | 0,006 | 1 |
| Helz      | 0,425562 | 0,040262 | 0,128 | 0,114 | 1 |
| Sufu      | 0,425563 | 0,029667 | 0,116 | 0,101 | 1 |
| St3gal2   | 0,425678 | 0,040646 | 0,169 | 0,154 | 1 |
| Cacnb3    | 0,425899 | 0,023352 | 0,031 | 0,023 | 1 |
| Pcna      | 0,42598  | 0,060045 | 0,624 | 0,641 | 1 |
| Pls1      | 0,426377 | 0,0009   | 0,932 | 0,928 | 1 |
| Gm12530   | 0,426382 | -0,00876 | 0,05  | 0,061 | 1 |
| Helz2     | 0,426396 | 0,00464  | 0,011 | 0,006 | 1 |
| H6pd      | 0,426396 | 0,00464  | 0,011 | 0,006 | 1 |
| Sez6      | 0,426396 | 0,00464  | 0,011 | 0,006 | 1 |
| BC055324  | 0,4264   | 0,006169 | 0,011 | 0,006 | 1 |
| Mphosph9  | 0,426721 | 0,01856  | 0,154 | 0,179 | 1 |

|            |          |          |       |       |   |
|------------|----------|----------|-------|-------|---|
| Pdcd11     | 0,426754 | 0,017312 | 0,301 | 0,342 | 1 |
| AL732506.  | 0,427165 | 0,007975 | 0,011 | 0,006 | 1 |
| Tctn3      | 0,427301 | -0,00679 | 0,051 | 0,063 | 1 |
| Hist1h4c   | 0,427605 | 0,005043 | 0,011 | 0,017 | 1 |
| 1700028K   | 0,427605 | -0,00036 | 0,011 | 0,017 | 1 |
| Pdzrn4     | 0,427605 | -0,00036 | 0,011 | 0,017 | 1 |
| Ahctf1     | 0,427939 | 0,06096  | 0,347 | 0,331 | 1 |
| Dpy19l1    | 0,428007 | 0,068611 | 0,998 | 0,994 | 1 |
| Snhg10     | 0,428281 | 0,011405 | 0,055 | 0,044 | 1 |
| Fmo5       | 0,428395 | 0,0047   | 0,053 | 0,065 | 1 |
| Hspa4      | 0,428433 | 0,001312 | 0,673 | 0,738 | 1 |
| Cul5       | 0,428552 | 0,068564 | 0,628 | 0,648 | 1 |
| Haus8      | 0,42864  | 0,024674 | 0,224 | 0,255 | 1 |
| Heatr5a    | 0,428676 | 0,021624 | 0,259 | 0,293 | 1 |
| Bcas1os2   | 0,428746 | 0,012198 | 0,024 | 0,017 | 1 |
| Thada      | 0,428946 | 0,002663 | 0,112 | 0,131 | 1 |
| Rbm14      | 0,428959 | 0,005196 | 0,2   | 0,228 | 1 |
| Plekhb2    | 0,428961 | 0,058469 | 0,365 | 0,363 | 1 |
| Chkb       | 0,429033 | 0,04714  | 0,303 | 0,291 | 1 |
| Lrsam1     | 0,429436 | 0,000736 | 0,13  | 0,15  | 1 |
| Slc35f5    | 0,42949  | 0,002366 | 0,176 | 0,2   | 1 |
| Etv6       | 0,429759 | -0,00531 | 0,053 | 0,065 | 1 |
| Zfp879     | 0,429887 | -0,00812 | 0,013 | 0,019 | 1 |
| Sgsm1      | 0,429887 | -0,01224 | 0,013 | 0,019 | 1 |
| 9330175M   | 0,430077 | -0,00036 | 0,011 | 0,017 | 1 |
| Olfr775    | 0,430077 | -0,00036 | 0,011 | 0,017 | 1 |
| Card6      | 0,430077 | 0,001446 | 0,011 | 0,017 | 1 |
| Zfp106     | 0,43025  | 0,010956 | 0,44  | 0,496 | 1 |
| Optn       | 0,430293 | 0,022456 | 0,347 | 0,399 | 1 |
| Hadha      | 0,430624 | 0,013662 | 0,8   | 0,768 | 1 |
| Asap3      | 0,430629 | 0,01018  | 0,039 | 0,03  | 1 |
| Zfp382     | 0,430677 | -0,00187 | 0,053 | 0,065 | 1 |
| Morc4      | 0,43084  | 0,014853 | 0,073 | 0,061 | 1 |
| Nav2       | 0,431067 | 0,03465  | 0,229 | 0,264 | 1 |
| Carns1     | 0,431396 | -0,02983 | 0,695 | 0,711 | 1 |
| Zfp667     | 0,431705 | -0,00263 | 0,055 | 0,068 | 1 |
| Fbxw15     | 0,431913 | -0,00605 | 0,013 | 0,019 | 1 |
| Camk2b     | 0,431913 | -0,00605 | 0,013 | 0,019 | 1 |
| Mdk        | 0,43221  | -0,01043 | 0,013 | 0,019 | 1 |
| Ctnnd1     | 0,432362 | 0,032955 | 0,407 | 0,475 | 1 |
| Dip2c      | 0,432522 | 0,109918 | 0,394 | 0,411 | 1 |
| Gm10643    | 0,432557 | 0,003246 | 0,011 | 0,017 | 1 |
| Egfem1     | 0,432797 | 0,008627 | 0,024 | 0,017 | 1 |
| Dna2       | 0,432797 | 0,008627 | 0,024 | 0,017 | 1 |
| Vgll4      | 0,433054 | 0,05805  | 0,738 | 0,726 | 1 |
| Mmachc     | 0,43313  | -0,0088  | 0,04  | 0,051 | 1 |
| Rrm1       | 0,433437 | -0,00297 | 0,264 | 0,291 | 1 |
| Olfr1369-p | 0,433717 | -0,04715 | 0,015 | 0,021 | 1 |
| Spred3     | 0,433823 | 0,011907 | 0,024 | 0,017 | 1 |
| Rusc1      | 0,434077 | 0,008342 | 0,024 | 0,017 | 1 |
| Pptc7      | 0,43409  | 0,034432 | 0,215 | 0,196 | 1 |
| Prpf40b    | 0,434375 | 0,01721  | 0,198 | 0,226 | 1 |

|          |          |          |       |       |   |
|----------|----------|----------|-------|-------|---|
| Cat      | 0,434648 | 0,001997 | 0,565 | 0,627 | 1 |
| Bfsp1    | 0,434655 | -0,01453 | 0,039 | 0,049 | 1 |
| Zfp429   | 0,434683 | 0,013098 | 0,031 | 0,023 | 1 |
| Fbxl19   | 0,435081 | -0,00375 | 0,123 | 0,141 | 1 |
| Nsdhl    | 0,435093 | 0,034401 | 0,264 | 0,3   | 1 |
| Dnmt3b   | 0,435123 | -0,0045  | 0,013 | 0,019 | 1 |
| Lsm11    | 0,435198 | 0,018596 | 0,057 | 0,046 | 1 |
| Atxn7l2  | 0,435216 | -0,00258 | 0,05  | 0,061 | 1 |
| Rpl8     | 0,435273 | 0,023056 | 0,994 | 0,992 | 1 |
| Clmn     | 0,435395 | -0,03613 | 0,921 | 0,865 | 1 |
| Pikfyve  | 0,435506 | 0,00966  | 0,383 | 0,439 | 1 |
| Gm15445  | 0,435546 | 0,015728 | 0,048 | 0,038 | 1 |
| Pnp      | 0,435686 | 0,022617 | 0,213 | 0,241 | 1 |
| Neto2    | 0,435859 | 0,008342 | 0,024 | 0,017 | 1 |
| Ms4a6c   | 0,436124 | 0,005994 | 0,024 | 0,017 | 1 |
| Gnl3     | 0,436227 | 0,104074 | 0,53  | 0,553 | 1 |
| Col1a2   | 0,436417 | 0,001833 | 0,095 | 0,112 | 1 |
| Rab26os  | 0,436688 | 0,018302 | 0,057 | 0,046 | 1 |
| Tle4     | 0,43676  | 0,086228 | 0,391 | 0,401 | 1 |
| Ninj1    | 0,436927 | -0,03732 | 0,099 | 0,114 | 1 |
| Nup107   | 0,436965 | 0,009486 | 0,105 | 0,122 | 1 |
| Slc25a37 | 0,437035 | 0,020764 | 0,075 | 0,063 | 1 |
| Sgsm3    | 0,437115 | -0,00214 | 0,119 | 0,137 | 1 |
| Gm5464   | 0,437164 | 0,004764 | 0,013 | 0,019 | 1 |
| 9130604C | 0,437164 | 0,001173 | 0,013 | 0,019 | 1 |
| Map3k7   | 0,437438 | 0,031538 | 0,338 | 0,392 | 1 |
| Grik4    | 0,437546 | -0,00108 | 0,132 | 0,152 | 1 |
| Zscan18  | 0,437765 | 0,002072 | 0,051 | 0,063 | 1 |
| Lims1    | 0,438041 | 0,077988 | 0,606 | 0,652 | 1 |
| Tmem35b  | 0,438088 | -0,01086 | 0,033 | 0,042 | 1 |
| Pnpo     | 0,438104 | -0,01068 | 0,017 | 0,023 | 1 |
| Tmem161b | 0,438299 | -0,00428 | 0,251 | 0,276 | 1 |
| Ccdc157  | 0,438435 | 0,030626 | 0,086 | 0,074 | 1 |
| AL591952 | 0,438488 | -0,0111  | 0,033 | 0,042 | 1 |
| Fxr2     | 0,438492 | 0,066057 | 0,642 | 0,671 | 1 |
| Ghr      | 0,438688 | -0,00044 | 0,024 | 0,017 | 1 |
| Mxd1     | 0,438753 | 0,040895 | 0,25  | 0,289 | 1 |
| Naa40    | 0,438771 | 0,011685 | 0,127 | 0,148 | 1 |
| Gm2885   | 0,438948 | -0,00656 | 0,015 | 0,021 | 1 |
| Anks6    | 0,438999 | 0,017716 | 0,057 | 0,046 | 1 |
| Cpt1a    | 0,439115 | -0,0083  | 0,039 | 0,049 | 1 |
| Ern1     | 0,439629 | -0,0106  | 0,079 | 0,093 | 1 |
| Rnft2    | 0,439676 | -0,01601 | 0,07  | 0,082 | 1 |
| Bnip3l   | 0,439699 | 0,045863 | 1     | 1     | 1 |
| Gm45620  | 0,439802 | -0,00063 | 0,013 | 0,019 | 1 |
| Sgce     | 0,440044 | 0,052267 | 0,609 | 0,713 | 1 |
| Ccpg1    | 0,440082 | 0,028413 | 0,288 | 0,329 | 1 |
| Spon1    | 0,440101 | 0,005994 | 0,013 | 0,019 | 1 |
| Dctn4    | 0,440203 | 0,03193  | 0,956 | 0,922 | 1 |
| Arfgef1  | 0,440212 | 0,072754 | 0,576 | 0,616 | 1 |
| Mitf     | 0,440543 | 0,018945 | 0,259 | 0,289 | 1 |
| Ttc9     | 0,440685 | -0,00482 | 0,196 | 0,219 | 1 |



|           |          |          |       |       |   |
|-----------|----------|----------|-------|-------|---|
| Ppm1l     | 0,441118 | 0,071387 | 0,336 | 0,333 | 1 |
| Stau2     | 0,441157 | -0,00088 | 0,095 | 0,112 | 1 |
| Chsy1     | 0,441161 | -0,0027  | 0,015 | 0,021 | 1 |
| Gm28221   | 0,441161 | -0,0027  | 0,015 | 0,021 | 1 |
| Ube2o     | 0,441197 | 0,055559 | 0,316 | 0,306 | 1 |
| 5430416Nl | 0,441777 | -0,01226 | 0,11  | 0,127 | 1 |
| Mysm1     | 0,442    | 0,083565 | 0,574 | 0,608 | 1 |
| Anxa6     | 0,442356 | 0,013994 | 0,048 | 0,038 | 1 |
| Gm20498   | 0,442503 | -0,00605 | 0,039 | 0,049 | 1 |
| Impad1    | 0,443328 | -0,00483 | 0,699 | 0,772 | 1 |
| Kcna1     | 0,443738 | 0,056696 | 0,923 | 0,88  | 1 |
| Gm20939   | 0,443943 | -0,0009  | 0,015 | 0,021 | 1 |
| Bicdl1    | 0,443982 | -0,00883 | 0,031 | 0,04  | 1 |
| Agpat1    | 0,444285 | 0,010037 | 0,31  | 0,35  | 1 |
| Akap8l    | 0,444396 | 0,013157 | 0,523 | 0,578 | 1 |
| Gm17435   | 0,444725 | 0,029631 | 0,059 | 0,049 | 1 |
| Tmem39b   | 0,444825 | -0,00366 | 0,084 | 0,099 | 1 |
| Sdk2      | 0,444858 | -0,02033 | 0,07  | 0,082 | 1 |
| Tmem51    | 0,445075 | 0,016292 | 0,057 | 0,046 | 1 |
| A130010J1 | 0,445143 | -0,01083 | 0,079 | 0,093 | 1 |
| Rab29     | 0,445166 | -0,01055 | 0,037 | 0,046 | 1 |
| 2900026A  | 0,445298 | -0,00938 | 0,02  | 0,027 | 1 |
| Samd12    | 0,445824 | -0,00731 | 0,033 | 0,042 | 1 |
| Ripor1    | 0,445907 | 0,015701 | 0,075 | 0,063 | 1 |
| Shc1      | 0,445966 | 0,028215 | 0,099 | 0,086 | 1 |
| Gnptab    | 0,4461   | -0,00271 | 0,587 | 0,648 | 1 |
| Rgl3      | 0,446168 | -0,00883 | 0,029 | 0,038 | 1 |
| Zbtb21    | 0,446435 | 0,072873 | 0,217 | 0,207 | 1 |
| Bcl6      | 0,446498 | 0,053088 | 0,211 | 0,198 | 1 |
| Gm10687   | 0,446511 | -0,00846 | 0,141 | 0,16  | 1 |
| Slc46a3   | 0,446734 | -0,0009  | 0,015 | 0,021 | 1 |
| Cnot7     | 0,446783 | 0,030193 | 0,369 | 0,43  | 1 |
| Gm31152   | 0,446814 | -0,00143 | 0,017 | 0,023 | 1 |
| Frg2f1    | 0,447359 | -0,00681 | 0,031 | 0,04  | 1 |
| Strip1    | 0,447404 | 0,0535   | 0,251 | 0,241 | 1 |
| Rps6kc1   | 0,447413 | -0,00103 | 0,163 | 0,184 | 1 |
| Slc9a6    | 0,447893 | -0,01998 | 0,371 | 0,392 | 1 |
| Proscos   | 0,448261 | -0,00733 | 0,022 | 0,03  | 1 |
| Trim13    | 0,448616 | 0,107056 | 0,492 | 0,544 | 1 |
| Khdrbs2   | 0,44874  | -0,00758 | 0,022 | 0,03  | 1 |
| Gm5547    | 0,448991 | -0,00883 | 0,022 | 0,03  | 1 |
| 1700088E  | 0,449047 | 0,000873 | 0,05  | 0,061 | 1 |
| Gm28041   | 0,449208 | -0,00322 | 0,017 | 0,023 | 1 |
| 4933415A  | 0,449535 | 0,006273 | 0,015 | 0,021 | 1 |
| Ube3c     | 0,449647 | 0,026506 | 0,343 | 0,388 | 1 |
| Gm12525   | 0,449915 | -0,00378 | 0,033 | 0,042 | 1 |
| Suclg2    | 0,450392 | 0,016902 | 0,04  | 0,032 | 1 |
| Fut11     | 0,450765 | 0,006463 | 0,152 | 0,173 | 1 |
| Vps54     | 0,451043 | 0,000327 | 0,204 | 0,228 | 1 |
| Nlgn3     | 0,451064 | -0,00706 | 0,024 | 0,032 | 1 |
| Dok1      | 0,451604 | 0,004209 | 0,017 | 0,023 | 1 |
| Txndc16   | 0,45166  | 0,061612 | 0,864 | 0,903 | 1 |

|           |          |          |       |       |   |
|-----------|----------|----------|-------|-------|---|
| Mycn      | 0,452009 | -0,00052 | 0,035 | 0,044 | 1 |
| Ubxn1     | 0,452054 | -0,00858 | 0,961 | 0,97  | 1 |
| Agrn      | 0,45233  | 0,05053  | 0,228 | 0,213 | 1 |
| Tpp1      | 0,452593 | 0,051477 | 0,657 | 0,686 | 1 |
| Qtrt1     | 0,452684 | -0,00692 | 0,16  | 0,179 | 1 |
| Eml3      | 0,452767 | 0,04217  | 0,207 | 0,192 | 1 |
| Lcorl     | 0,452932 | 0,074286 | 0,626 | 0,643 | 1 |
| Smarcc1   | 0,453168 | 0,028627 | 0,486 | 0,553 | 1 |
| Vamp5     | 0,453853 | 0,089479 | 0,464 | 0,481 | 1 |
| Neat1     | 0,453922 | -0,02637 | 0,996 | 0,992 | 1 |
| Gm45184   | 0,453967 | -0,00274 | 0,028 | 0,036 | 1 |
| Aldh1l2   | 0,454226 | -0,01366 | 0,394 | 0,424 | 1 |
| Zbtb44    | 0,454301 | 0,063567 | 0,36  | 0,357 | 1 |
| Atad3a    | 0,454325 | 0,018605 | 0,213 | 0,241 | 1 |
| Edc4      | 0,454413 | 0,045851 | 0,224 | 0,213 | 1 |
| Fbxw9     | 0,454498 | 0,004225 | 0,161 | 0,184 | 1 |
| Hk1       | 0,454716 | 0,075329 | 0,29  | 0,287 | 1 |
| Cbx3      | 0,454875 | -0,01618 | 0,936 | 0,93  | 1 |
| Sec31a    | 0,454887 | 0,065406 | 0,446 | 0,468 | 1 |
| Scaf8     | 0,455107 | 0,023589 | 0,321 | 0,363 | 1 |
| Prep      | 0,455293 | -0,00436 | 0,077 | 0,091 | 1 |
| Siae      | 0,455427 | 0,030377 | 0,167 | 0,152 | 1 |
| Gm16099   | 0,455588 | -0,00426 | 0,024 | 0,032 | 1 |
| Cdc42se2  | 0,455752 | 0,047946 | 0,767 | 0,772 | 1 |
| Ddi2      | 0,456565 | 0,077563 | 0,29  | 0,285 | 1 |
| 6330403LC | 0,457252 | 0,034471 | 0,112 | 0,099 | 1 |
| Tmem8     | 0,457258 | 0,002985 | 0,037 | 0,046 | 1 |
| Aldh1l1   | 0,457339 | 0,014863 | 0,04  | 0,032 | 1 |
| Meis2     | 0,457752 | -0,01813 | 0,22  | 0,245 | 1 |
| Pole      | 0,457755 | 0,001608 | 0,02  | 0,027 | 1 |
| Rsph10b   | 0,457835 | 0,00097  | 0,037 | 0,046 | 1 |
| Zfp334    | 0,457884 | 0,008203 | 0,114 | 0,131 | 1 |
| Gm26660   | 0,458251 | 0,008318 | 0,088 | 0,103 | 1 |
| Pogk      | 0,458259 | 0,059059 | 0,661 | 0,69  | 1 |
| Ctdspl    | 0,45835  | 0,074506 | 0,417 | 0,428 | 1 |
| Zmym1     | 0,458392 | -0,00667 | 0,198 | 0,219 | 1 |
| Asb1      | 0,458501 | -0,00544 | 0,233 | 0,255 | 1 |
| Taf4      | 0,458713 | 0,047947 | 0,149 | 0,137 | 1 |
| Egf       | 0,458996 | 0,011367 | 0,02  | 0,027 | 1 |
| Gm26808   | 0,458997 | -0,00097 | 0,026 | 0,034 | 1 |
| Gm29562   | 0,45941  | 0,016356 | 0,018 | 0,013 | 1 |
| Yrdc      | 0,459574 | 0,0015   | 0,251 | 0,278 | 1 |
| Cop1      | 0,459934 | 0,065949 | 0,521 | 0,563 | 1 |
| Ints6l    | 0,459973 | 0,019597 | 0,382 | 0,435 | 1 |
| Slit2     | 0,460115 | 0,013987 | 0,033 | 0,025 | 1 |
| Tmem86a   | 0,460214 | -0,00123 | 0,029 | 0,038 | 1 |
| Ttpal     | 0,460475 | 0,043052 | 0,145 | 0,133 | 1 |
| Cavin4    | 0,460543 | 0,008842 | 0,086 | 0,101 | 1 |
| Hp1bp3    | 0,46081  | 0,044823 | 0,868 | 0,861 | 1 |
| Ttc17     | 0,460869 | -0,01128 | 0,2   | 0,222 | 1 |
| Cars2     | 0,460987 | -0,01258 | 0,16  | 0,179 | 1 |
| Hoxd3     | 0,461214 | 0,010994 | 0,018 | 0,013 | 1 |

|            |          |          |       |       |   |
|------------|----------|----------|-------|-------|---|
| Tmem53     | 0,461214 | 0,012785 | 0,018 | 0,013 | 1 |
| T2         | 0,461214 | 0,016356 | 0,018 | 0,013 | 1 |
| Gramd1a    | 0,461304 | 0,020824 | 0,228 | 0,257 | 1 |
| Ttc13      | 0,461361 | 0,053419 | 0,172 | 0,162 | 1 |
| Asl        | 0,461671 | 0,023411 | 0,121 | 0,108 | 1 |
| Tstd2      | 0,461683 | 0,01752  | 0,257 | 0,289 | 1 |
| Mbtps1     | 0,462186 | 0,006642 | 0,448 | 0,506 | 1 |
| Mbnl2      | 0,462322 | 0,02449  | 1     | 0,998 | 1 |
| Fam84b     | 0,462424 | 0,010704 | 0,018 | 0,013 | 1 |
| Gm37305    | 0,462447 | -0,0007  | 0,022 | 0,03  | 1 |
| Pgm1       | 0,46257  | 0,041075 | 0,062 | 0,053 | 1 |
| Akap8      | 0,462586 | 0,068231 | 0,407 | 0,42  | 1 |
| Gnptg      | 0,462637 | 0,005547 | 0,572 | 0,627 | 1 |
| Stt3b      | 0,462765 | 0,01058  | 0,367 | 0,411 | 1 |
| Fau        | 0,463391 | 0,004474 | 0,998 | 0,996 | 1 |
| Itn1       | 0,463674 | -0,00331 | 0,121 | 0,137 | 1 |
| Ddx28      | 0,463728 | -0,01384 | 0,064 | 0,076 | 1 |
| Snap29     | 0,463743 | 0,05108  | 0,29  | 0,335 | 1 |
| Kcni3      | 0,46387  | 0,012517 | 0,033 | 0,025 | 1 |
| Xkr8       | 0,463917 | 0,021352 | 0,07  | 0,059 | 1 |
| Rab1a      | 0,463978 | 0,011432 | 0,574 | 0,641 | 1 |
| Zkscan2    | 0,463979 | 0,000537 | 0,029 | 0,038 | 1 |
| Hr         | 0,463987 | 0,050402 | 0,255 | 0,245 | 1 |
| Eml5       | 0,464099 | 0,011142 | 0,176 | 0,2   | 1 |
| Zdhhc5     | 0,464139 | 0,000716 | 0,165 | 0,186 | 1 |
| St6galnac5 | 0,46456  | 0,009614 | 0,033 | 0,025 | 1 |
| Mdm4       | 0,464752 | 0,033294 | 0,672 | 0,681 | 1 |
| 4833418Nl  | 0,464821 | 0,003386 | 0,022 | 0,03  | 1 |
| Zbtb8a     | 0,464833 | 0,009201 | 0,018 | 0,013 | 1 |
| Stam       | 0,464845 | 0,088808 | 0,484 | 0,521 | 1 |
| Cep70      | 0,465498 | 0,010203 | 0,143 | 0,165 | 1 |
| Tex30      | 0,465653 | -0,00675 | 0,101 | 0,116 | 1 |
| Ccdc114    | 0,46605  | 0,007119 | 0,018 | 0,013 | 1 |
| Hells      | 0,46605  | 0,007119 | 0,018 | 0,013 | 1 |
| Ppfia1     | 0,466369 | 0,016991 | 0,273 | 0,304 | 1 |
| Lonrf2     | 0,46676  | 0,008983 | 0,033 | 0,025 | 1 |
| Ifrd1      | 0,467077 | 0,026154 | 0,534 | 0,612 | 1 |
| F8         | 0,467163 | -0,00556 | 0,068 | 0,08  | 1 |
| Rhbdf1     | 0,467868 | 0,005323 | 0,018 | 0,013 | 1 |
| Kti12      | 0,468054 | 0,019205 | 0,108 | 0,095 | 1 |
| Acaca      | 0,468077 | 0,057132 | 0,806 | 0,819 | 1 |
| Camk2n2    | 0,468107 | -0,01772 | 0,061 | 0,072 | 1 |
| R3hcc1l    | 0,46813  | 0,025218 | 0,224 | 0,255 | 1 |
| Gns        | 0,46816  | 0,017677 | 0,407 | 0,451 | 1 |
| Irak3      | 0,468842 | -0,00741 | 0,119 | 0,135 | 1 |
| Elfn2      | 0,469089 | 0,005043 | 0,018 | 0,013 | 1 |
| Lrrc8a     | 0,469476 | 0,009857 | 0,171 | 0,194 | 1 |
| Rnf2       | 0,469559 | 0,011462 | 0,132 | 0,152 | 1 |
| Lypla1     | 0,469649 | -0,00251 | 0,204 | 0,226 | 1 |
| Tpp2       | 0,469726 | 0,01669  | 0,294 | 0,331 | 1 |
| Bsc12      | 0,469942 | 0,020662 | 0,363 | 0,403 | 1 |
| Cul7       | 0,470124 | 0,022755 | 0,143 | 0,129 | 1 |

|          |          |          |       |       |   |
|----------|----------|----------|-------|-------|---|
| Nbr1     | 0,47043  | 0,027721 | 0,763 | 0,808 | 1 |
| Tbc1d24  | 0,470778 | 0,011945 | 0,193 | 0,217 | 1 |
| Gm48551  | 0,47102  | 0,015155 | 0,042 | 0,034 | 1 |
| Chn2     | 0,471516 | -0,0117  | 0,881 | 0,882 | 1 |
| Zfp697   | 0,471528 | 0,013391 | 0,026 | 0,019 | 1 |
| Rnaset2b | 0,471557 | 0,000262 | 0,136 | 0,154 | 1 |
| B4galt5  | 0,471783 | 0,009838 | 0,026 | 0,019 | 1 |
| Zfyve27  | 0,471893 | 0,008425 | 0,391 | 0,432 | 1 |
| Arl2bp   | 0,472007 | -0,00682 | 0,842 | 0,859 | 1 |
| Usp37    | 0,472092 | 0,063546 | 0,328 | 0,321 | 1 |
| Vars     | 0,472539 | -0,00283 | 0,239 | 0,259 | 1 |
| Ptpn12   | 0,472607 | 0,041885 | 0,209 | 0,194 | 1 |
| Ccdc9    | 0,472955 | 0,001358 | 0,136 | 0,154 | 1 |
| Fam168a  | 0,472981 | -0,01667 | 0,971 | 0,968 | 1 |
| Gnb2     | 0,473413 | 0,012942 | 0,982 | 0,983 | 1 |
| Hivep1   | 0,473818 | -0,01205 | 0,066 | 0,078 | 1 |
| Gnao1    | 0,474624 | -0,01283 | 0,998 | 0,998 | 1 |
| Gm26853  | 0,474958 | 0,019533 | 0,235 | 0,264 | 1 |
| Golga4   | 0,475059 | 0,048774 | 0,615 | 0,614 | 1 |
| Slc22a23 | 0,475527 | 0,092819 | 0,563 | 0,603 | 1 |
| Zc3h12c  | 0,475908 | 0,006286 | 0,138 | 0,156 | 1 |
| Tab2     | 0,476056 | 0,038211 | 0,655 | 0,673 | 1 |
| Gm26882  | 0,476556 | 0,031047 | 0,094 | 0,082 | 1 |
| Camta1   | 0,477025 | 0,029972 | 0,576 | 0,639 | 1 |
| Dvl2     | 0,477791 | 0,016208 | 0,229 | 0,257 | 1 |
| Crtc3    | 0,477882 | 0,079784 | 0,352 | 0,359 | 1 |
| Zfp46    | 0,478163 | 0,008904 | 0,139 | 0,158 | 1 |
| Pcdhb19  | 0,478888 | 0,025202 | 0,07  | 0,059 | 1 |
| Pcdh17   | 0,479109 | -0,00211 | 0,424 | 0,487 | 1 |
| Ppt1     | 0,479562 | -0,00346 | 0,738 | 0,785 | 1 |
| Pcdhgc5  | 0,47977  | 0,012829 | 0,042 | 0,034 | 1 |
| Rpn1     | 0,480164 | 0,000643 | 0,758 | 0,793 | 1 |
| Elac1    | 0,480347 | 0,036312 | 0,149 | 0,135 | 1 |
| Rb1      | 0,480401 | 0,073413 | 0,426 | 0,439 | 1 |
| Twsg1    | 0,48049  | 0,007025 | 0,233 | 0,257 | 1 |
| Rffl     | 0,480528 | 0,007726 | 0,78  | 0,833 | 1 |
| Arap2    | 0,480603 | 0,046456 | 0,936 | 0,905 | 1 |
| Akap9    | 0,480649 | 0,004588 | 0,774 | 0,783 | 1 |
| Prdm15   | 0,481026 | 0,017295 | 0,088 | 0,103 | 1 |
| Itgb4    | 0,481258 | -0,00978 | 0,772 | 0,757 | 1 |
| Flot2    | 0,481937 | 0,060669 | 0,303 | 0,293 | 1 |
| Rab7b    | 0,481962 | -0,02161 | 0,152 | 0,169 | 1 |
| Lztr1    | 0,482796 | 0,017897 | 0,45  | 0,496 | 1 |
| Katnb1   | 0,483368 | -0,00852 | 0,143 | 0,16  | 1 |
| Tom1     | 0,48362  | 0,025913 | 0,38  | 0,424 | 1 |
| Cnot3    | 0,483644 | -0,00044 | 0,532 | 0,591 | 1 |
| Apoa2    | 0,483664 | -0,00448 | 0,002 | 0,004 | 1 |
| Meig1    | 0,483664 | -0,00448 | 0,002 | 0,004 | 1 |
| Efhc2    | 0,483664 | -0,00448 | 0,002 | 0,004 | 1 |
| Eva1b    | 0,483664 | -0,00448 | 0,002 | 0,004 | 1 |
| Arhgap18 | 0,483664 | -0,00448 | 0,002 | 0,004 | 1 |
| Gm45894  | 0,483664 | -0,00448 | 0,002 | 0,004 | 1 |

|           |          |          |       |       |   |
|-----------|----------|----------|-------|-------|---|
| M5C1000I: | 0,483664 | -0,00448 | 0,002 | 0,004 | 1 |
| Spsb4     | 0,483664 | -0,00448 | 0,002 | 0,004 | 1 |
| Arhgap44  | 0,483664 | -0,00448 | 0,002 | 0,004 | 1 |
| Ebi3      | 0,483664 | -0,00448 | 0,002 | 0,004 | 1 |
| Rell2     | 0,483664 | -0,00448 | 0,002 | 0,004 | 1 |
| Gjb6      | 0,483664 | -0,00657 | 0,002 | 0,004 | 1 |
| Spry4     | 0,483664 | -0,00866 | 0,002 | 0,004 | 1 |
| Mpp4      | 0,484374 | -0,00238 | 0,002 | 0,004 | 1 |
| Zdbf2     | 0,484374 | -0,00238 | 0,002 | 0,004 | 1 |
| Myl1      | 0,484374 | -0,00238 | 0,002 | 0,004 | 1 |
| Gm28535   | 0,484374 | -0,00238 | 0,002 | 0,004 | 1 |
| Plekha6   | 0,484374 | -0,00238 | 0,002 | 0,004 | 1 |
| Platr23   | 0,484374 | -0,00238 | 0,002 | 0,004 | 1 |
| Cd84      | 0,484374 | -0,00238 | 0,002 | 0,004 | 1 |
| 49305510: | 0,484374 | -0,00238 | 0,002 | 0,004 | 1 |
| Fcnaos    | 0,484374 | -0,00238 | 0,002 | 0,004 | 1 |
| Ttc16     | 0,484374 | -0,00238 | 0,002 | 0,004 | 1 |
| Trp53i11  | 0,484374 | -0,00238 | 0,002 | 0,004 | 1 |
| Elf5      | 0,484374 | -0,00238 | 0,002 | 0,004 | 1 |
| Lamp5     | 0,484374 | -0,00238 | 0,002 | 0,004 | 1 |
| 6820408C: | 0,484374 | -0,00238 | 0,002 | 0,004 | 1 |
| Ptptrt    | 0,484374 | -0,00238 | 0,002 | 0,004 | 1 |
| Bmp7      | 0,484374 | -0,00238 | 0,002 | 0,004 | 1 |
| Gm14862   | 0,484374 | -0,00238 | 0,002 | 0,004 | 1 |
| Cybb      | 0,484374 | -0,00238 | 0,002 | 0,004 | 1 |
| Gpc4      | 0,484374 | -0,00238 | 0,002 | 0,004 | 1 |
| Xlr4b     | 0,484374 | -0,00238 | 0,002 | 0,004 | 1 |
| Kcne1l    | 0,484374 | -0,00238 | 0,002 | 0,004 | 1 |
| Dcx       | 0,484374 | -0,00238 | 0,002 | 0,004 | 1 |
| Gm20754   | 0,484374 | -0,00238 | 0,002 | 0,004 | 1 |
| Tlr2      | 0,484374 | -0,00238 | 0,002 | 0,004 | 1 |
| Gm43714   | 0,484374 | -0,00238 | 0,002 | 0,004 | 1 |
| She       | 0,484374 | -0,00238 | 0,002 | 0,004 | 1 |
| Gm31305   | 0,484374 | -0,00238 | 0,002 | 0,004 | 1 |
| Casq2     | 0,484374 | -0,00238 | 0,002 | 0,004 | 1 |
| Gm21962   | 0,484374 | -0,00238 | 0,002 | 0,004 | 1 |
| Epha7     | 0,484374 | -0,00238 | 0,002 | 0,004 | 1 |
| Ak4       | 0,484374 | -0,00238 | 0,002 | 0,004 | 1 |
| Skint8    | 0,484374 | -0,00238 | 0,002 | 0,004 | 1 |
| Csf3r     | 0,484374 | -0,00238 | 0,002 | 0,004 | 1 |
| Trnp1     | 0,484374 | -0,00238 | 0,002 | 0,004 | 1 |
| Nphp4     | 0,484374 | -0,00238 | 0,002 | 0,004 | 1 |
| Gm10062   | 0,484374 | -0,00238 | 0,002 | 0,004 | 1 |
| Ppp2r2cos | 0,484374 | -0,00238 | 0,002 | 0,004 | 1 |
| Ncapg     | 0,484374 | -0,00238 | 0,002 | 0,004 | 1 |
| 0610040JC | 0,484374 | -0,00238 | 0,002 | 0,004 | 1 |
| Rhoh      | 0,484374 | -0,00238 | 0,002 | 0,004 | 1 |
| 9130230L2 | 0,484374 | -0,00238 | 0,002 | 0,004 | 1 |
| Hcar2     | 0,484374 | -0,00238 | 0,002 | 0,004 | 1 |
| Tmem130   | 0,484374 | -0,00238 | 0,002 | 0,004 | 1 |
| Hoxa9     | 0,484374 | -0,00238 | 0,002 | 0,004 | 1 |
| A2m       | 0,484374 | -0,00238 | 0,002 | 0,004 | 1 |

|            |          |          |       |       |   |
|------------|----------|----------|-------|-------|---|
| Cdca3      | 0,484374 | -0,00238 | 0,002 | 0,004 | 1 |
| Gm15704    | 0,484374 | -0,00238 | 0,002 | 0,004 | 1 |
| Vmn2r28    | 0,484374 | -0,00238 | 0,002 | 0,004 | 1 |
| Vmn2r29    | 0,484374 | -0,00238 | 0,002 | 0,004 | 1 |
| Cd22       | 0,484374 | -0,00238 | 0,002 | 0,004 | 1 |
| Prss23     | 0,484374 | -0,00238 | 0,002 | 0,004 | 1 |
| Ddias      | 0,484374 | -0,00238 | 0,002 | 0,004 | 1 |
| Plk1       | 0,484374 | -0,00238 | 0,002 | 0,004 | 1 |
| Coro1a     | 0,484374 | -0,00238 | 0,002 | 0,004 | 1 |
| Nps        | 0,484374 | -0,00238 | 0,002 | 0,004 | 1 |
| Pbld2      | 0,484374 | -0,00238 | 0,002 | 0,004 | 1 |
| Itgb2      | 0,484374 | -0,00238 | 0,002 | 0,004 | 1 |
| Chst11     | 0,484374 | -0,00238 | 0,002 | 0,004 | 1 |
| Parpbp     | 0,484374 | -0,00238 | 0,002 | 0,004 | 1 |
| Gm47578    | 0,484374 | -0,00238 | 0,002 | 0,004 | 1 |
| Pawr       | 0,484374 | -0,00238 | 0,002 | 0,004 | 1 |
| Gm32552    | 0,484374 | -0,00238 | 0,002 | 0,004 | 1 |
| Gm16230    | 0,484374 | -0,00238 | 0,002 | 0,004 | 1 |
| Mcf2l      | 0,484374 | -0,00238 | 0,002 | 0,004 | 1 |
| Slc7a2     | 0,484374 | -0,00238 | 0,002 | 0,004 | 1 |
| Galntl6    | 0,484374 | -0,00238 | 0,002 | 0,004 | 1 |
| Csgalnact1 | 0,484374 | -0,00238 | 0,002 | 0,004 | 1 |
| Jak3       | 0,484374 | -0,00238 | 0,002 | 0,004 | 1 |
| Gm35572    | 0,484374 | -0,00238 | 0,002 | 0,004 | 1 |
| 4933406B:  | 0,484374 | -0,00238 | 0,002 | 0,004 | 1 |
| Elmo3      | 0,484374 | -0,00238 | 0,002 | 0,004 | 1 |
| Fhod1      | 0,484374 | -0,00238 | 0,002 | 0,004 | 1 |
| Gm17344    | 0,484374 | -0,00238 | 0,002 | 0,004 | 1 |
| A430057M   | 0,484374 | -0,00238 | 0,002 | 0,004 | 1 |
| Nefm       | 0,484374 | -0,00238 | 0,002 | 0,004 | 1 |
| AC114585.  | 0,484374 | -0,00238 | 0,002 | 0,004 | 1 |
| Fli1       | 0,484374 | -0,00238 | 0,002 | 0,004 | 1 |
| Olfr976    | 0,484374 | -0,00238 | 0,002 | 0,004 | 1 |
| 1700110K:  | 0,484374 | -0,00238 | 0,002 | 0,004 | 1 |
| Rbms3      | 0,484374 | -0,00238 | 0,002 | 0,004 | 1 |
| 4732414G:  | 0,484374 | -0,00238 | 0,002 | 0,004 | 1 |
| Dph1       | 0,484374 | -0,00238 | 0,002 | 0,004 | 1 |
| Abhd15     | 0,484374 | -0,00238 | 0,002 | 0,004 | 1 |
| Plxdc1     | 0,484374 | -0,00238 | 0,002 | 0,004 | 1 |
| Hsd17b1    | 0,484374 | -0,00238 | 0,002 | 0,004 | 1 |
| Golm1      | 0,484374 | -0,00238 | 0,002 | 0,004 | 1 |
| 4930525G:  | 0,484374 | -0,00238 | 0,002 | 0,004 | 1 |
| Ckmt2      | 0,484374 | -0,00238 | 0,002 | 0,004 | 1 |
| Gm26527    | 0,484374 | -0,00238 | 0,002 | 0,004 | 1 |
| Gm48780    | 0,484374 | -0,00238 | 0,002 | 0,004 | 1 |
| Batf       | 0,484374 | -0,00238 | 0,002 | 0,004 | 1 |
| Gm26531    | 0,484374 | -0,00238 | 0,002 | 0,004 | 1 |
| Gm32618    | 0,484374 | -0,00238 | 0,002 | 0,004 | 1 |
| Ppara      | 0,484374 | -0,00238 | 0,002 | 0,004 | 1 |
| Cpt1b      | 0,484374 | -0,00238 | 0,002 | 0,004 | 1 |
| Cpne8      | 0,484374 | -0,00238 | 0,002 | 0,004 | 1 |
| AC125199.  | 0,484374 | -0,00238 | 0,002 | 0,004 | 1 |

|           |          |          |       |       |   |
|-----------|----------|----------|-------|-------|---|
| Gm16196   | 0,484374 | -0,00238 | 0,002 | 0,004 | 1 |
| Gpsm3     | 0,484374 | -0,00238 | 0,002 | 0,004 | 1 |
| H2-Q6     | 0,484374 | -0,00238 | 0,002 | 0,004 | 1 |
| Gm20443   | 0,484374 | -0,00238 | 0,002 | 0,004 | 1 |
| Capn11    | 0,484374 | -0,00238 | 0,002 | 0,004 | 1 |
| Gnmt      | 0,484374 | -0,00238 | 0,002 | 0,004 | 1 |
| Ddx11     | 0,484374 | -0,00238 | 0,002 | 0,004 | 1 |
| Gm26734   | 0,484374 | -0,00238 | 0,002 | 0,004 | 1 |
| Ankrd29   | 0,484374 | -0,00238 | 0,002 | 0,004 | 1 |
| Gm26823   | 0,484374 | -0,00238 | 0,002 | 0,004 | 1 |
| Mcc       | 0,484374 | -0,00238 | 0,002 | 0,004 | 1 |
| Gm17669   | 0,484374 | -0,00238 | 0,002 | 0,004 | 1 |
| A330032B: | 0,484374 | -0,00238 | 0,002 | 0,004 | 1 |
| Gm15402   | 0,484375 | -0,00683 | 0,002 | 0,004 | 1 |
| Zfp169    | 0,484745 | 0,004012 | 0,106 | 0,122 | 1 |
| Gm26879   | 0,484747 | 0,02182  | 0,044 | 0,036 | 1 |
| Stk11ip   | 0,484951 | -0,01475 | 0,105 | 0,118 | 1 |
| Itpr3     | 0,485085 | -0,00318 | 0,002 | 0,004 | 1 |
| Fbxl8     | 0,485326 | 0,022334 | 0,053 | 0,044 | 1 |
| Ncbp3     | 0,485647 | 0,014572 | 0,272 | 0,304 | 1 |
| Pcdhb17   | 0,485683 | -0,0165  | 0,114 | 0,129 | 1 |
| Pot1b     | 0,485775 | 0,037756 | 0,138 | 0,127 | 1 |
| Lpl       | 0,485797 | 0,003102 | 0,002 | 0,004 | 1 |
| Gm19345   | 0,485797 | 0,001279 | 0,002 | 0,004 | 1 |
| Piwil4    | 0,485797 | 0,001279 | 0,002 | 0,004 | 1 |
| Mdh1b     | 0,485797 | -0,00055 | 0,002 | 0,004 | 1 |
| Gm26936   | 0,485797 | -0,00055 | 0,002 | 0,004 | 1 |
| Phf19     | 0,485797 | -0,00055 | 0,002 | 0,004 | 1 |
| Snph      | 0,485797 | -0,00055 | 0,002 | 0,004 | 1 |
| Gm26952   | 0,485797 | -0,00055 | 0,002 | 0,004 | 1 |
| Tsx       | 0,485797 | -0,00055 | 0,002 | 0,004 | 1 |
| Dmrta1    | 0,485797 | -0,00055 | 0,002 | 0,004 | 1 |
| Gm29707   | 0,485797 | -0,00055 | 0,002 | 0,004 | 1 |
| Gm15612   | 0,485797 | -0,00055 | 0,002 | 0,004 | 1 |
| Vmn1r65   | 0,485797 | -0,00055 | 0,002 | 0,004 | 1 |
| Glipr1    | 0,485797 | -0,00055 | 0,002 | 0,004 | 1 |
| Shisa2    | 0,485797 | -0,00055 | 0,002 | 0,004 | 1 |
| Ephx2     | 0,485797 | -0,00055 | 0,002 | 0,004 | 1 |
| Col22a1   | 0,485797 | -0,00055 | 0,002 | 0,004 | 1 |
| Spats2    | 0,485797 | -0,00055 | 0,002 | 0,004 | 1 |
| Krt83     | 0,485797 | -0,00055 | 0,002 | 0,004 | 1 |
| Vasn      | 0,485797 | -0,00055 | 0,002 | 0,004 | 1 |
| Cd74      | 0,485797 | -0,00055 | 0,002 | 0,004 | 1 |
| Prx       | 0,485797 | 0,009779 | 0,002 | 0,004 | 1 |
| Ak9       | 0,485797 | 0,001003 | 0,002 | 0,004 | 1 |
| Arpc4     | 0,486035 | 0,000768 | 0,71  | 0,77  | 1 |
| Vegfa     | 0,48604  | 0,04642  | 0,103 | 0,118 | 1 |
| Galns     | 0,486519 | 0,023531 | 0,072 | 0,061 | 1 |
| 4933434Ez | 0,487094 | -0,00332 | 0,699 | 0,77  | 1 |
| Rras2     | 0,487628 | 0,012033 | 0,061 | 0,051 | 1 |
| Pias3     | 0,487711 | 0,014821 | 0,171 | 0,194 | 1 |
| Ppp1r3e   | 0,487844 | 0,038522 | 0,169 | 0,156 | 1 |

|          |          |          |       |       |   |
|----------|----------|----------|-------|-------|---|
| Fam71e1  | 0,487921 | -0,01198 | 0,053 | 0,063 | 1 |
| Cherp    | 0,487931 | 0,048062 | 0,279 | 0,268 | 1 |
| Hnrnpk   | 0,488153 | 0,048294 | 1     | 0,992 | 1 |
| Plcb4    | 0,488262 | -0,00837 | 0,161 | 0,179 | 1 |
| Klhl42   | 0,488672 | -0,01009 | 0,138 | 0,154 | 1 |
| Cdkn2c   | 0,488726 | -0,00605 | 0,061 | 0,072 | 1 |
| Cdk12    | 0,488729 | 0,057357 | 0,578 | 0,61  | 1 |
| Dyrk1a   | 0,488891 | 0,074735 | 0,406 | 0,43  | 1 |
| Mier1    | 0,489267 | 0,00484  | 0,639 | 0,696 | 1 |
| Mocs1    | 0,48932  | 0,016194 | 0,119 | 0,105 | 1 |
| Abcg2    | 0,489469 | -0,01096 | 0,053 | 0,063 | 1 |
| AA986860 | 0,489661 | -0,00213 | 0,062 | 0,074 | 1 |
| Nrp2     | 0,490198 | 0,032645 | 0,16  | 0,146 | 1 |
| Fam160a2 | 0,490634 | -0,00914 | 0,152 | 0,169 | 1 |
| Rala     | 0,49118  | -0,01917 | 0,817 | 0,812 | 1 |
| Prrc1    | 0,492058 | 0,041648 | 0,242 | 0,232 | 1 |
| Idh1     | 0,492244 | 0,057381 | 0,53  | 0,544 | 1 |
| Focad    | 0,492256 | 0,00175  | 0,095 | 0,11  | 1 |
| Nsd3     | 0,493224 | 0,060567 | 0,648 | 0,673 | 1 |
| Cep164   | 0,494041 | 0,012094 | 0,253 | 0,281 | 1 |
| Gm4593   | 0,494107 | 0,102381 | 0,532 | 0,574 | 1 |
| Tgfa     | 0,494483 | 0,044894 | 0,824 | 0,823 | 1 |
| Nmnat2   | 0,494864 | 0,007975 | 0,013 | 0,008 | 1 |
| Bid      | 0,494864 | 0,007975 | 0,013 | 0,008 | 1 |
| Nek8     | 0,494864 | 0,01517  | 0,013 | 0,008 | 1 |
| Fam241b  | 0,495281 | -0,00845 | 0,084 | 0,097 | 1 |
| Ubxn4    | 0,495433 | -0,01454 | 0,846 | 0,848 | 1 |
| Pakap    | 0,495621 | 0,011286 | 0,013 | 0,008 | 1 |
| Dhrs13os | 0,495621 | 0,009489 | 0,013 | 0,008 | 1 |
| Pold3    | 0,496155 | -0,00401 | 0,233 | 0,253 | 1 |
| Chaf1b   | 0,496371 | 0,009779 | 0,013 | 0,008 | 1 |
| Gm21992  | 0,496371 | 0,007975 | 0,013 | 0,008 | 1 |
| Gm44718  | 0,496371 | 0,006169 | 0,013 | 0,008 | 1 |
| Gm26804  | 0,496371 | 0,006169 | 0,013 | 0,008 | 1 |
| Hyls1    | 0,496371 | 0,006169 | 0,013 | 0,008 | 1 |
| Trim33   | 0,496445 | 0,022249 | 0,356 | 0,407 | 1 |
| Dcaf5    | 0,497238 | 0,026239 | 0,171 | 0,156 | 1 |
| Gcn1l1   | 0,497687 | 0,031151 | 0,391 | 0,445 | 1 |
| Hoxd4    | 0,49788  | 0,004359 | 0,013 | 0,008 | 1 |
| Galnt2   | 0,49788  | 0,004359 | 0,013 | 0,008 | 1 |
| Utrn     | 0,498263 | -0,0027  | 0,013 | 0,008 | 1 |
| Wdr4     | 0,498368 | -0,00438 | 0,088 | 0,101 | 1 |
| Ccdc163  | 0,498552 | 0,027476 | 0,242 | 0,272 | 1 |
| Dhtkd1   | 0,498595 | -0,00238 | 0,059 | 0,07  | 1 |
| Capn5    | 0,49892  | 0,011462 | 0,266 | 0,293 | 1 |
| Thoc2    | 0,498947 | 0,066186 | 0,622 | 0,641 | 1 |
| Nyap1    | 0,499018 | 0,004079 | 0,013 | 0,008 | 1 |
| Pnrc2    | 0,499733 | 0,027882 | 0,404 | 0,456 | 1 |
| Pcdhb10  | 0,500222 | 0,016334 | 0,028 | 0,021 | 1 |
| Uhmk1    | 0,500509 | 0,064517 | 0,402 | 0,405 | 1 |
| Heatr1   | 0,500725 | -0,00939 | 0,081 | 0,093 | 1 |
| Mtmr4    | 0,500787 | 0,071731 | 0,312 | 0,31  | 1 |



|           |          |          |       |       |   |
|-----------|----------|----------|-------|-------|---|
| Rgs12     | 0,50122  | 0,011616 | 0,028 | 0,021 | 1 |
| Evi2      | 0,50122  | 0,011616 | 0,028 | 0,021 | 1 |
| Tpd52     | 0,501643 | -0,00418 | 0,804 | 0,812 | 1 |
| Ephb6     | 0,501673 | 0,001993 | 0,013 | 0,008 | 1 |
| Rfx7      | 0,502013 | 0,002596 | 0,262 | 0,289 | 1 |
| Fam83d    | 0,502255 | 0,024476 | 0,028 | 0,021 | 1 |
| Zhx1      | 0,502906 | 0,037215 | 0,404 | 0,46  | 1 |
| Zfp335    | 0,503082 | 0,019314 | 0,083 | 0,072 | 1 |
| Zbtb12    | 0,503421 | -0,00426 | 0,145 | 0,162 | 1 |
| Dcaf1     | 0,50351  | 0,005182 | 0,261 | 0,289 | 1 |
| Plat      | 0,503794 | -0,01434 | 0,356 | 0,384 | 1 |
| Plod1     | 0,503989 | 0,049264 | 0,71  | 0,728 | 1 |
| Zfp281    | 0,503996 | 0,070918 | 0,668 | 0,696 | 1 |
| Arih2     | 0,50401  | 0,019357 | 0,33  | 0,361 | 1 |
| Arhgap5   | 0,504046 | 0,039611 | 0,952 | 0,941 | 1 |
| Dicer1    | 0,504275 | 0,079557 | 0,607 | 0,66  | 1 |
| Zfp28     | 0,504311 | 0,001552 | 0,057 | 0,068 | 1 |
| Prickle2  | 0,50457  | 0,024645 | 0,393 | 0,445 | 1 |
| Mib1      | 0,504725 | 0,090069 | 0,369 | 0,38  | 1 |
| 1810055G  | 0,504785 | -0,00628 | 0,11  | 0,124 | 1 |
| Ncapg2    | 0,504806 | 0,050223 | 0,158 | 0,148 | 1 |
| Gm17382   | 0,504856 | 0,017834 | 0,02  | 0,015 | 1 |
| Bbs4      | 0,505088 | -0,00672 | 0,138 | 0,154 | 1 |
| Ubiad1    | 0,505954 | -0,00892 | 0,083 | 0,095 | 1 |
| St3gal6   | 0,506449 | 0,069543 | 0,272 | 0,266 | 1 |
| Tmcc1     | 0,507118 | 0,071277 | 0,897 | 0,901 | 1 |
| Lrig2     | 0,507183 | 0,011275 | 0,277 | 0,306 | 1 |
| Hbp1      | 0,507188 | 0,07759  | 0,593 | 0,629 | 1 |
| Mier2     | 0,507206 | -0,00714 | 0,172 | 0,19  | 1 |
| Cdipt     | 0,507445 | 0,010994 | 0,347 | 0,386 | 1 |
| Cdk15     | 0,50755  | 0,015757 | 0,02  | 0,015 | 1 |
| Slc2a12   | 0,507576 | 0,007774 | 0,028 | 0,021 | 1 |
| Poc1b     | 0,507824 | 0,048822 | 0,196 | 0,186 | 1 |
| Zbtb2     | 0,50786  | 0,003643 | 0,127 | 0,143 | 1 |
| Rps5      | 0,508193 | 0,017966 | 0,993 | 0,981 | 1 |
| Syn1      | 0,508359 | -0,00813 | 0,106 | 0,12  | 1 |
| Nr6a1     | 0,508883 | 0,003522 | 0,057 | 0,068 | 1 |
| AC154507. | 0,509042 | 0,008913 | 0,02  | 0,015 | 1 |
| Gm26519   | 0,509308 | 0,022124 | 0,037 | 0,03  | 1 |
| Ssbp4     | 0,509803 | 0,017105 | 0,073 | 0,063 | 1 |
| Zfp984    | 0,510126 | 0,005994 | 0,028 | 0,021 | 1 |
| Bex3      | 0,510322 | 0,034466 | 0,281 | 0,266 | 1 |
| Arntl     | 0,510897 | -0,00892 | 0,079 | 0,091 | 1 |
| Pde12     | 0,511059 | 0,013824 | 0,171 | 0,192 | 1 |
| Sp4       | 0,511146 | 0,004779 | 0,314 | 0,344 | 1 |
| Stk35     | 0,511862 | -0,01978 | 0,121 | 0,135 | 1 |
| Calm2     | 0,512621 | -0,00295 | 0,998 | 0,992 | 1 |
| Recql4    | 0,512683 | 0,004209 | 0,028 | 0,021 | 1 |
| Slc22a7   | 0,512707 | 0,013972 | 0,007 | 0,004 | 1 |
| Pipox     | 0,513086 | -0,00111 | 0,055 | 0,065 | 1 |
| Nfib      | 0,513186 | 0,051353 | 0,888 | 0,884 | 1 |
| Tmem200c  | 0,51356  | 0,006554 | 0,02  | 0,015 | 1 |

|           |          |          |       |       |   |
|-----------|----------|----------|-------|-------|---|
| Rnf150    | 0,513745 | 0,010362 | 0,007 | 0,004 | 1 |
| Rbm22     | 0,514029 | 0,049172 | 0,637 | 0,652 | 1 |
| Zfp408    | 0,514131 | 0,001812 | 0,055 | 0,065 | 1 |
| Fkbp2     | 0,514697 | 0,003282 | 0,815 | 0,823 | 1 |
| Ddx60     | 0,514783 | 0,006738 | 0,007 | 0,004 | 1 |
| Gm49226   | 0,514783 | 0,006738 | 0,007 | 0,004 | 1 |
| Cpne9     | 0,514783 | 0,012168 | 0,007 | 0,004 | 1 |
| Tbx2      | 0,514783 | 0,012168 | 0,007 | 0,004 | 1 |
| Tnnc1     | 0,514783 | 0,010362 | 0,007 | 0,004 | 1 |
| Stat5b    | 0,514952 | 0,007198 | 0,092 | 0,105 | 1 |
| Slc35f6   | 0,515079 | 0,021195 | 0,338 | 0,378 | 1 |
| Eif4g2    | 0,515556 | 0,045368 | 0,993 | 0,998 | 1 |
| Ttl       | 0,515793 | 0,043052 | 0,128 | 0,118 | 1 |
| Il6ra     | 0,515822 | 0,008552 | 0,007 | 0,004 | 1 |
| Rfx2      | 0,515822 | 0,006738 | 0,007 | 0,004 | 1 |
| Hsd11b1   | 0,515822 | 0,004922 | 0,007 | 0,004 | 1 |
| Sall4     | 0,515822 | 0,004922 | 0,007 | 0,004 | 1 |
| Gja6      | 0,515822 | 0,004922 | 0,007 | 0,004 | 1 |
| Slc27a3   | 0,515822 | 0,004922 | 0,007 | 0,004 | 1 |
| Phtf1os   | 0,515822 | 0,004922 | 0,007 | 0,004 | 1 |
| Dpysl4    | 0,515822 | 0,004922 | 0,007 | 0,004 | 1 |
| 4930405J1 | 0,515822 | 0,004922 | 0,007 | 0,004 | 1 |
| Eif4ebp1  | 0,515822 | 0,004922 | 0,007 | 0,004 | 1 |
| Prkcd     | 0,515822 | 0,004922 | 0,007 | 0,004 | 1 |
| Uaca      | 0,515822 | 0,004922 | 0,007 | 0,004 | 1 |
| Fbxl22    | 0,515822 | 0,004922 | 0,007 | 0,004 | 1 |
| Gm37401   | 0,515822 | 0,004922 | 0,007 | 0,004 | 1 |
| Hecw1     | 0,515822 | 0,004922 | 0,007 | 0,004 | 1 |
| Rnf144b   | 0,515822 | 0,004922 | 0,007 | 0,004 | 1 |
| Gm10269   | 0,515822 | 0,004922 | 0,007 | 0,004 | 1 |
| Ppp2ca    | 0,515959 | 0,042143 | 0,998 | 0,992 | 1 |
| Cblb      | 0,51598  | 0,054381 | 0,239 | 0,228 | 1 |
| Cyth2     | 0,516028 | 0,066608 | 0,582 | 0,616 | 1 |
| Camsap2   | 0,516256 | 0,092175 | 0,387 | 0,409 | 1 |
| Cdc42ep3  | 0,516344 | 0,008263 | 0,007 | 0,004 | 1 |
| Gm43597   | 0,516488 | 0,004437 | 0,061 | 0,072 | 1 |
| Mlxip     | 0,51652  | 0,04187  | 0,183 | 0,173 | 1 |
| Kif28     | 0,516862 | 0,003102 | 0,007 | 0,004 | 1 |
| Cybrd1    | 0,516862 | 0,003102 | 0,007 | 0,004 | 1 |
| Ankef1    | 0,516862 | 0,003102 | 0,007 | 0,004 | 1 |
| Rhox8     | 0,516862 | 0,003102 | 0,007 | 0,004 | 1 |
| Gm15577   | 0,516862 | 0,003102 | 0,007 | 0,004 | 1 |
| Cdk19os   | 0,516862 | 0,003102 | 0,007 | 0,004 | 1 |
| Pcsk4     | 0,516862 | 0,003102 | 0,007 | 0,004 | 1 |
| Gm11175   | 0,516862 | 0,003102 | 0,007 | 0,004 | 1 |
| Gm35256   | 0,516862 | 0,003102 | 0,007 | 0,004 | 1 |
| Slc12a3   | 0,516862 | 0,003102 | 0,007 | 0,004 | 1 |
| Gm16741   | 0,516862 | 0,003102 | 0,007 | 0,004 | 1 |
| 1700102P  | 0,516862 | 0,003102 | 0,007 | 0,004 | 1 |
| Psme2b    | 0,516862 | 0,003102 | 0,007 | 0,004 | 1 |
| Cd300lg   | 0,516862 | 0,003102 | 0,007 | 0,004 | 1 |
| Arhgap27  | 0,516862 | 0,003102 | 0,007 | 0,004 | 1 |

|          |          |          |       |       |   |
|----------|----------|----------|-------|-------|---|
| Gm17529  | 0,516862 | 0,003102 | 0,007 | 0,004 | 1 |
| Gm15738  | 0,516862 | 0,003102 | 0,007 | 0,004 | 1 |
| Nme4     | 0,516862 | 0,003102 | 0,007 | 0,004 | 1 |
| Pcdha8   | 0,516862 | 0,003102 | 0,007 | 0,004 | 1 |
| Gm42997  | 0,516864 | 0,00464  | 0,007 | 0,004 | 1 |
| Nfatc1   | 0,516864 | 0,00464  | 0,007 | 0,004 | 1 |
| Pla2g15  | 0,516998 | 0,003124 | 0,05  | 0,059 | 1 |
| Gpbp1    | 0,517341 | 0,051068 | 0,606 | 0,654 | 1 |
| Dchs1    | 0,517385 | 0,008263 | 0,007 | 0,004 | 1 |
| Gm16105  | 0,517385 | 0,006453 | 0,007 | 0,004 | 1 |
| Wnk2     | 0,517385 | 0,00464  | 0,007 | 0,004 | 1 |
| Hsd17b12 | 0,517565 | 0,049912 | 0,815 | 0,829 | 1 |
| Tm6sf1   | 0,517695 | 0,013695 | 0,037 | 0,03  | 1 |
| Ptpn23   | 0,517852 | 0,047245 | 0,277 | 0,268 | 1 |
| Stmn3    | 0,517855 | -0,0088  | 0,044 | 0,053 | 1 |
| Limd2    | 0,517906 | 0,002823 | 0,007 | 0,004 | 1 |
| Sema4f   | 0,517906 | 0,002269 | 0,007 | 0,004 | 1 |
| Galnt1   | 0,518156 | 0,066031 | 0,501 | 0,527 | 1 |
| Rpl19    | 0,518343 | 0,024859 | 1     | 0,994 | 1 |
| Flywch2  | 0,518644 | 0,001549 | 0,114 | 0,129 | 1 |
| D830035M | 0,518948 | 0,001003 | 0,007 | 0,004 | 1 |
| Tdrp     | 0,518948 | -0,00318 | 0,007 | 0,004 | 1 |
| Mcm2     | 0,519304 | 0,000349 | 0,09  | 0,103 | 1 |
| Dnajc18  | 0,519755 | 0,005118 | 0,611 | 0,658 | 1 |
| Tln2     | 0,520099 | 0,086546 | 0,495 | 0,506 | 1 |
| Gdap1    | 0,520226 | 0,051073 | 0,114 | 0,103 | 1 |
| Naa50    | 0,520669 | 0,028205 | 0,484 | 0,546 | 1 |
| Mrgpre   | 0,520725 | 0,002757 | 0,084 | 0,097 | 1 |
| Dcaf15   | 0,520906 | -0,0083  | 0,139 | 0,154 | 1 |
| Il2      | 0,521957 | -0,00207 | 0,05  | 0,059 | 1 |
| Nupr1    | 0,522153 | 0,002529 | 0,094 | 0,082 | 1 |
| Ctdp1    | 0,522236 | 0,004643 | 0,112 | 0,127 | 1 |
| Use1     | 0,522281 | 0,045873 | 0,618 | 0,641 | 1 |
| Gm9801   | 0,522291 | 0,001134 | 0,051 | 0,061 | 1 |
| Slc5a6   | 0,522562 | 0,043998 | 0,13  | 0,12  | 1 |
| Rufy3    | 0,522762 | 0,042654 | 0,928 | 0,935 | 1 |
| Arcn1    | 0,523092 | 0,024787 | 0,583 | 0,646 | 1 |
| Alkbh4   | 0,523378 | 0,001395 | 0,046 | 0,055 | 1 |
| Gm29666  | 0,523497 | 0,013994 | 0,037 | 0,03  | 1 |
| Scfd1    | 0,52367  | 0,034462 | 0,42  | 0,466 | 1 |
| Naglu    | 0,523841 | 0,008781 | 0,171 | 0,19  | 1 |
| Tnks1bp1 | 0,523912 | -0,00317 | 0,079 | 0,091 | 1 |
| Hnrnpm   | 0,52436  | 0,009355 | 0,732 | 0,766 | 1 |
| Pitrm1   | 0,524394 | 0,006069 | 0,088 | 0,101 | 1 |
| Xpnpep3  | 0,525156 | 0,006463 | 0,15  | 0,169 | 1 |
| Gm340    | 0,525822 | 0,017359 | 0,064 | 0,076 | 1 |
| Cdkal1   | 0,525898 | 0,006544 | 0,305 | 0,338 | 1 |
| Cops7b   | 0,526157 | 0,012529 | 0,147 | 0,165 | 1 |
| Sos2     | 0,526319 | 0,055557 | 0,475 | 0,5   | 1 |
| Chst14   | 0,526667 | 0,000183 | 0,046 | 0,055 | 1 |
| Klhl21   | 0,527077 | 0,03056  | 0,112 | 0,101 | 1 |
| Dek      | 0,527476 | 0,038232 | 0,855 | 0,844 | 1 |

|          |          |          |       |       |   |
|----------|----------|----------|-------|-------|---|
| Nudt12   | 0,527595 | -0,00356 | 0,042 | 0,051 | 1 |
| Thra     | 0,527708 | -0,00257 | 0,989 | 0,989 | 1 |
| Nckipsd  | 0,527729 | -0,00726 | 0,072 | 0,082 | 1 |
| Katna1   | 0,527752 | 0,011177 | 0,187 | 0,209 | 1 |
| Adamts6  | 0,527809 | 0,006572 | 0,046 | 0,055 | 1 |
| Smarca4  | 0,528303 | 0,067995 | 0,602 | 0,629 | 1 |
| Senp6    | 0,528565 | 0,040734 | 0,85  | 0,84  | 1 |
| Msr3     | 0,528579 | 0,018394 | 0,029 | 0,023 | 1 |
| Cyp26b1  | 0,528656 | 0,008772 | 0,037 | 0,03  | 1 |
| Capn15   | 0,528825 | 0,016102 | 0,29  | 0,316 | 1 |
| Cd200    | 0,528923 | 0,063087 | 0,174 | 0,162 | 1 |
| Trp53    | 0,528961 | 0,029674 | 0,273 | 0,259 | 1 |
| Nol4l    | 0,529235 | 0,079522 | 0,358 | 0,369 | 1 |
| Ube2r2   | 0,529804 | 0,006792 | 0,594 | 0,652 | 1 |
| Al606181 | 0,529929 | 0,000265 | 0,106 | 0,12  | 1 |
| Dync2li1 | 0,530577 | -0,01559 | 0,13  | 0,143 | 1 |
| Map2k6   | 0,530726 | -0,00233 | 0,048 | 0,057 | 1 |
| Nono     | 0,530803 | 0,046639 | 0,642 | 0,671 | 1 |
| Nphp3    | 0,530842 | 0,001349 | 0,081 | 0,093 | 1 |
| Anapc1   | 0,531173 | -0,00143 | 0,382 | 0,422 | 1 |
| Polr3f   | 0,53121  | 0,034036 | 0,196 | 0,224 | 1 |
| Rnf20    | 0,531317 | 0,001802 | 0,624 | 0,662 | 1 |
| Gm20604  | 0,531999 | 0,001395 | 0,048 | 0,057 | 1 |
| Pabpn1   | 0,532024 | 0,06787  | 0,782 | 0,823 | 1 |
| Klhdc4   | 0,532151 | -0,00176 | 0,176 | 0,196 | 1 |
| Gm5148   | 0,532182 | 0,010009 | 0,048 | 0,057 | 1 |
| Ephx4    | 0,532379 | 0,001134 | 0,048 | 0,057 | 1 |
| Slc44a2  | 0,532435 | 0,029021 | 0,387 | 0,432 | 1 |
| Rpl10a   | 0,53264  | 0,056985 | 0,912 | 0,914 | 1 |
| Glt1d1   | 0,532665 | -0,00454 | 0,04  | 0,049 | 1 |
| Al314180 | 0,532969 | 0,036238 | 0,501 | 0,572 | 1 |
| Il12a    | 0,533004 | -7,7E-05 | 0,042 | 0,051 | 1 |
| Gpcpd1   | 0,533286 | 0,025846 | 0,147 | 0,167 | 1 |
| Rab3b    | 0,533558 | 0,034181 | 0,209 | 0,198 | 1 |
| Ammecr1  | 0,533873 | 0,029111 | 0,088 | 0,078 | 1 |
| 25100390 | 0,5339   | 0,019143 | 0,328 | 0,361 | 1 |
| Gm12976  | 0,534197 | 0,001962 | 0,073 | 0,063 | 1 |
| Scyl2    | 0,534233 | 0,036477 | 0,22  | 0,209 | 1 |
| Ap2m1    | 0,534274 | 0,041591 | 0,928 | 0,947 | 1 |
| Dcaf6    | 0,535188 | 0,019027 | 0,336 | 0,367 | 1 |
| Naa16    | 0,535328 | 0,04085  | 0,24  | 0,23  | 1 |
| Knop1    | 0,536323 | 0,030643 | 0,622 | 0,679 | 1 |
| Fkbp7    | 0,536435 | -0,0068  | 0,04  | 0,049 | 1 |
| Nlgn2    | 0,536512 | 0,019832 | 0,206 | 0,192 | 1 |
| Isoc1    | 0,536539 | 0,002108 | 0,079 | 0,091 | 1 |
| Zfp715   | 0,536771 | -0,00975 | 0,114 | 0,127 | 1 |
| C1qtnf12 | 0,536859 | 0,001854 | 0,079 | 0,091 | 1 |
| Cpsf1    | 0,53694  | 0,003407 | 0,18  | 0,198 | 1 |
| Rela     | 0,536951 | 0,013301 | 0,429 | 0,473 | 1 |
| Fam8a1   | 0,537012 | 0,018143 | 0,308 | 0,342 | 1 |
| Gm48960  | 0,537647 | 0,014572 | 0,029 | 0,023 | 1 |
| Rnft1    | 0,538018 | 0,032777 | 0,103 | 0,093 | 1 |

|            |          |          |       |       |   |
|------------|----------|----------|-------|-------|---|
| 1700020I1  | 0,53816  | 0,067342 | 0,593 | 0,629 | 1 |
| Rassf8     | 0,538219 | 0,016343 | 0,429 | 0,492 | 1 |
| Fbf1       | 0,538417 | -0,00229 | 0,15  | 0,167 | 1 |
| Tmem229t   | 0,538427 | -0,01019 | 0,068 | 0,078 | 1 |
| Raf1       | 0,539568 | 0,057648 | 0,569 | 0,614 | 1 |
| Chadl      | 0,53993  | -0,01588 | 0,128 | 0,143 | 1 |
| Plscr3     | 0,539986 | -0,01189 | 0,139 | 0,154 | 1 |
| Tbc1d16    | 0,54004  | 0,074348 | 0,418 | 0,439 | 1 |
| Atp2a2     | 0,540135 | -0,03214 | 0,866 | 0,869 | 1 |
| Elovl6     | 0,540387 | 0,029533 | 0,679 | 0,741 | 1 |
| Bmpr1a     | 0,54057  | 0,023685 | 0,299 | 0,333 | 1 |
| Bbs1       | 0,541081 | 0,006069 | 0,084 | 0,097 | 1 |
| Bloc1s6os  | 0,541449 | 0,019303 | 0,022 | 0,017 | 1 |
| Gpr19      | 0,541828 | 0,035138 | 0,154 | 0,143 | 1 |
| Kdelc2     | 0,542392 | 0,015438 | 0,048 | 0,04  | 1 |
| 2610020C   | 0,542655 | -0,00279 | 0,039 | 0,046 | 1 |
| Fam208a    | 0,54323  | 0,038767 | 0,71  | 0,709 | 1 |
| Oaf        | 0,543318 | -0,00279 | 0,037 | 0,044 | 1 |
| Gen1       | 0,543476 | 0,007493 | 0,029 | 0,023 | 1 |
| BC024978   | 0,543657 | -0,00088 | 0,097 | 0,11  | 1 |
| Mapkapk2   | 0,543682 | 0,023372 | 0,347 | 0,39  | 1 |
| Tsta3      | 0,54376  | 0,039938 | 0,242 | 0,234 | 1 |
| Kansl1l    | 0,543793 | 0,087088 | 0,338 | 0,348 | 1 |
| Ets2       | 0,543802 | 0,015757 | 0,022 | 0,017 | 1 |
| Gad2       | 0,544146 | -0,00474 | 0,004 | 0,006 | 1 |
| Serinc4    | 0,544146 | -0,00474 | 0,004 | 0,006 | 1 |
| Gm11851    | 0,544146 | -0,00474 | 0,004 | 0,006 | 1 |
| 9530046B   | 0,544146 | -0,00474 | 0,004 | 0,006 | 1 |
| Uba7       | 0,544146 | -0,00474 | 0,004 | 0,006 | 1 |
| Hmmr       | 0,544146 | -0,00474 | 0,004 | 0,006 | 1 |
| Sgo1       | 0,544146 | -0,00474 | 0,004 | 0,006 | 1 |
| Zmynd10    | 0,544146 | -0,00892 | 0,004 | 0,006 | 1 |
| Cd24a      | 0,544146 | -0,011   | 0,004 | 0,006 | 1 |
| 1810041L1  | 0,544146 | -0,02134 | 0,004 | 0,006 | 1 |
| Hba-a2     | 0,544146 | -0,11553 | 0,004 | 0,006 | 1 |
| Shq1       | 0,544835 | -0,00776 | 0,066 | 0,076 | 1 |
| Ccdc14     | 0,544959 | 0,01746  | 0,048 | 0,04  | 1 |
| Gm26892    | 0,545317 | -0,00265 | 0,004 | 0,006 | 1 |
| Gm36975    | 0,545317 | -0,00265 | 0,004 | 0,006 | 1 |
| Fcrl6      | 0,545317 | -0,00265 | 0,004 | 0,006 | 1 |
| Dlx1as     | 0,545317 | -0,00265 | 0,004 | 0,006 | 1 |
| Olfr1191-p | 0,545317 | -0,00265 | 0,004 | 0,006 | 1 |
| Slc12a5    | 0,545317 | -0,00265 | 0,004 | 0,006 | 1 |
| Gm14820    | 0,545317 | -0,00265 | 0,004 | 0,006 | 1 |
| Tm4sf4     | 0,545317 | -0,00265 | 0,004 | 0,006 | 1 |
| Kcnn3      | 0,545317 | -0,00265 | 0,004 | 0,006 | 1 |
| Rrh        | 0,545317 | -0,00265 | 0,004 | 0,006 | 1 |
| Gm11261    | 0,545317 | -0,00265 | 0,004 | 0,006 | 1 |
| Stpg1      | 0,545317 | -0,00265 | 0,004 | 0,006 | 1 |
| Fhad1      | 0,545317 | -0,00265 | 0,004 | 0,006 | 1 |
| Gm13091    | 0,545317 | -0,00265 | 0,004 | 0,006 | 1 |
| Cd38       | 0,545317 | -0,00265 | 0,004 | 0,006 | 1 |

|           |          |          |       |       |   |
|-----------|----------|----------|-------|-------|---|
| Gm42745   | 0,545317 | -0,00265 | 0,004 | 0,006 | 1 |
| Gm43136   | 0,545317 | -0,00265 | 0,004 | 0,006 | 1 |
| Hepacam2  | 0,545317 | -0,00265 | 0,004 | 0,006 | 1 |
| Irf5      | 0,545317 | -0,00265 | 0,004 | 0,006 | 1 |
| 5730596B: | 0,545317 | -0,00265 | 0,004 | 0,006 | 1 |
| Loxl3     | 0,545317 | -0,00265 | 0,004 | 0,006 | 1 |
| Gm4969    | 0,545317 | -0,00265 | 0,004 | 0,006 | 1 |
| Ttc9b     | 0,545317 | -0,00265 | 0,004 | 0,006 | 1 |
| Fbxo17    | 0,545317 | -0,00265 | 0,004 | 0,006 | 1 |
| Rasgrp4   | 0,545317 | -0,00265 | 0,004 | 0,006 | 1 |
| Lsr       | 0,545317 | -0,00265 | 0,004 | 0,006 | 1 |
| Gm26790   | 0,545317 | -0,00265 | 0,004 | 0,006 | 1 |
| Syng4     | 0,545317 | -0,00265 | 0,004 | 0,006 | 1 |
| Ttc23     | 0,545317 | -0,00265 | 0,004 | 0,006 | 1 |
| Lmo1      | 0,545317 | -0,00265 | 0,004 | 0,006 | 1 |
| Gm44647   | 0,545317 | -0,00265 | 0,004 | 0,006 | 1 |
| Pgghg     | 0,545317 | -0,00265 | 0,004 | 0,006 | 1 |
| Smpdl3a   | 0,545317 | -0,00265 | 0,004 | 0,006 | 1 |
| Gm16235   | 0,545317 | -0,00265 | 0,004 | 0,006 | 1 |
| Tnfsf13b  | 0,545317 | -0,00265 | 0,004 | 0,006 | 1 |
| Gm21119   | 0,545317 | -0,00265 | 0,004 | 0,006 | 1 |
| Gm16183   | 0,545317 | -0,00265 | 0,004 | 0,006 | 1 |
| Lingo1    | 0,545317 | -0,00265 | 0,004 | 0,006 | 1 |
| Odf3l1    | 0,545317 | -0,00265 | 0,004 | 0,006 | 1 |
| Ttk       | 0,545317 | -0,00265 | 0,004 | 0,006 | 1 |
| Slc35g2   | 0,545317 | -0,00265 | 0,004 | 0,006 | 1 |
| 4833445I0 | 0,545317 | -0,00265 | 0,004 | 0,006 | 1 |
| Gm28048   | 0,545317 | -0,00265 | 0,004 | 0,006 | 1 |
| 1700125H: | 0,545317 | -0,00265 | 0,004 | 0,006 | 1 |
| Sp6       | 0,545317 | -0,00265 | 0,004 | 0,006 | 1 |
| C030017D: | 0,545317 | -0,00265 | 0,004 | 0,006 | 1 |
| Gm31508   | 0,545317 | -0,00265 | 0,004 | 0,006 | 1 |
| Gm17597   | 0,545317 | -0,00265 | 0,004 | 0,006 | 1 |
| Polq      | 0,545317 | -0,00265 | 0,004 | 0,006 | 1 |
| Stx19     | 0,545317 | -0,00265 | 0,004 | 0,006 | 1 |
| Gm20468   | 0,545317 | -0,00265 | 0,004 | 0,006 | 1 |
| Ndc80     | 0,545317 | -0,00265 | 0,004 | 0,006 | 1 |
| Gm10184   | 0,545317 | -0,00265 | 0,004 | 0,006 | 1 |
| Rasgrp2   | 0,545317 | -0,00265 | 0,004 | 0,006 | 1 |
| Elk1      | 0,545635 | 1,43E-05 | 0,073 | 0,084 | 1 |
| Rbm4      | 0,54564  | 0,024903 | 0,079 | 0,07  | 1 |
| Pmel      | 0,545904 | -0,00291 | 0,004 | 0,006 | 1 |
| Ggt6      | 0,545904 | -0,00291 | 0,004 | 0,006 | 1 |
| Serpinf1  | 0,545904 | -0,00291 | 0,004 | 0,006 | 1 |
| Gm47015   | 0,545904 | -0,00812 | 0,004 | 0,006 | 1 |
| Tbc1d25   | 0,545948 | 0,002717 | 0,04  | 0,049 | 1 |
| 4833413G: | 0,546719 | -0,00078 | 0,039 | 0,046 | 1 |
| Kbtbd11   | 0,546815 | 0,016535 | 0,077 | 0,068 | 1 |
| 4933429H: | 0,547076 | 0,001003 | 0,004 | 0,006 | 1 |
| Rnf223    | 0,547076 | 0,001003 | 0,004 | 0,006 | 1 |
| Mtus2     | 0,547076 | 0,001003 | 0,004 | 0,006 | 1 |
| Fcgbp     | 0,547076 | 0,001003 | 0,004 | 0,006 | 1 |

|           |          |          |       |       |   |
|-----------|----------|----------|-------|-------|---|
| Rbfox1    | 0,547076 | 0,001003 | 0,004 | 0,006 | 1 |
| Gm26562   | 0,547076 | 0,001003 | 0,004 | 0,006 | 1 |
| Npl       | 0,547076 | -0,00082 | 0,004 | 0,006 | 1 |
| Exo1      | 0,547076 | -0,00082 | 0,004 | 0,006 | 1 |
| Disp1     | 0,547076 | -0,00082 | 0,004 | 0,006 | 1 |
| AA543186  | 0,547076 | -0,00082 | 0,004 | 0,006 | 1 |
| Gm26899   | 0,547076 | -0,00082 | 0,004 | 0,006 | 1 |
| Lhfp      | 0,547076 | -0,00082 | 0,004 | 0,006 | 1 |
| Fam151a   | 0,547076 | -0,00082 | 0,004 | 0,006 | 1 |
| Cyp4x1    | 0,547076 | -0,00082 | 0,004 | 0,006 | 1 |
| Pzp       | 0,547076 | -0,00082 | 0,004 | 0,006 | 1 |
| Scamp4    | 0,547076 | -0,00082 | 0,004 | 0,006 | 1 |
| Sh2d4b    | 0,547076 | -0,00082 | 0,004 | 0,006 | 1 |
| Dlgap5    | 0,547076 | -0,00082 | 0,004 | 0,006 | 1 |
| Gm12224   | 0,547076 | -0,00082 | 0,004 | 0,006 | 1 |
| Slfn5     | 0,547076 | -0,00082 | 0,004 | 0,006 | 1 |
| Tbx4      | 0,547076 | -0,00082 | 0,004 | 0,006 | 1 |
| Myl4      | 0,547076 | -0,00082 | 0,004 | 0,006 | 1 |
| Pitpnc1   | 0,547076 | -0,00082 | 0,004 | 0,006 | 1 |
| Cacng4    | 0,547076 | -0,00082 | 0,004 | 0,006 | 1 |
| Gmpr      | 0,547076 | -0,00082 | 0,004 | 0,006 | 1 |
| Rslcan18  | 0,547076 | -0,00082 | 0,004 | 0,006 | 1 |
| Abcd2     | 0,547076 | -0,00082 | 0,004 | 0,006 | 1 |
| Gng13     | 0,547076 | -0,00082 | 0,004 | 0,006 | 1 |
| Gm15956   | 0,547076 | -0,00082 | 0,004 | 0,006 | 1 |
| 2010110K: | 0,547076 | -0,00082 | 0,004 | 0,006 | 1 |
| Fam19a5   | 0,547728 | 0,034404 | 0,483 | 0,555 | 1 |
| Grin3a    | 0,548251 | 0,000729 | 0,004 | 0,006 | 1 |
| Lrriq3    | 0,548523 | 0,013979 | 0,022 | 0,017 | 1 |
| Tbl2      | 0,548756 | -0,00447 | 0,136 | 0,15  | 1 |
| Gm43403   | 0,548839 | 0,001003 | 0,004 | 0,006 | 1 |
| Gm45069   | 0,548839 | 0,00464  | 0,004 | 0,006 | 1 |
| Plau      | 0,548839 | 0,002823 | 0,004 | 0,006 | 1 |
| Nap1l2    | 0,549416 | 0,011907 | 0,022 | 0,017 | 1 |
| Tapbp     | 0,549866 | 0,077665 | 0,33  | 0,333 | 1 |
| Wdr59     | 0,549926 | 0,001945 | 0,202 | 0,222 | 1 |
| Dll1      | 0,550328 | 0,065808 | 0,062 | 0,055 | 1 |
| Gm12758   | 0,55055  | 0,002717 | 0,04  | 0,049 | 1 |
| Gm40841   | 0,55089  | 0,008627 | 0,022 | 0,017 | 1 |
| Epas1     | 0,551033 | -0,00108 | 0,114 | 0,127 | 1 |
| Dzank1    | 0,551682 | -0,00628 | 0,09  | 0,101 | 1 |
| Gm38393   | 0,551756 | 0,026133 | 0,092 | 0,082 | 1 |
| Prdm10    | 0,551923 | 0,001854 | 0,075 | 0,086 | 1 |
| Gm13905   | 0,552083 | 0,008342 | 0,022 | 0,017 | 1 |
| Sos1      | 0,552669 | 0,028627 | 0,486 | 0,557 | 1 |
| Gm36423   | 0,552925 | 0,009489 | 0,015 | 0,011 | 1 |
| Col23a1   | 0,552925 | 0,01308  | 0,015 | 0,011 | 1 |
| Hic2      | 0,552978 | 0,028674 | 0,081 | 0,072 | 1 |
| Tmem210   | 0,553262 | 0,006836 | 0,022 | 0,017 | 1 |
| Ilk       | 0,553415 | 0,016092 | 0,637 | 0,696 | 1 |
| Rin2      | 0,553988 | 0,057757 | 0,259 | 0,253 | 1 |
| Wdr81     | 0,554244 | 0,042165 | 0,206 | 0,196 | 1 |

|           |          |          |       |       |   |
|-----------|----------|----------|-------|-------|---|
| Zfp777    | 0,554458 | 0,008389 | 0,108 | 0,122 | 1 |
| Gm13919   | 0,554761 | 0,007689 | 0,015 | 0,011 | 1 |
| Cpxm1     | 0,554761 | 0,007689 | 0,015 | 0,011 | 1 |
| lpo4      | 0,554822 | -0,00583 | 0,161 | 0,177 | 1 |
| 1700020Dl | 0,555058 | -0,01465 | 0,029 | 0,036 | 1 |
| Cep135    | 0,55584  | 0,001735 | 0,132 | 0,146 | 1 |
| Eid1      | 0,555953 | 0,003042 | 0,974 | 0,981 | 1 |
| Jam2      | 0,556455 | -0,00049 | 0,07  | 0,08  | 1 |
| Pccb      | 0,556471 | 0,001682 | 0,361 | 0,395 | 1 |
| Ankrd13c  | 0,556544 | 0,024962 | 0,409 | 0,46  | 1 |
| Gm29361   | 0,5566   | 0,009489 | 0,015 | 0,011 | 1 |
| Olfr1322  | 0,5566   | 0,005886 | 0,015 | 0,011 | 1 |
| Kcnmb4    | 0,5566   | 0,005886 | 0,015 | 0,011 | 1 |
| Lrrc8e    | 0,556838 | 0,004764 | 0,022 | 0,017 | 1 |
| Taf15     | 0,557302 | 0,008668 | 0,58  | 0,646 | 1 |
| Sh3pxd2a  | 0,557341 | 0,007404 | 0,015 | 0,011 | 1 |
| Srsf7     | 0,557641 | 0,055193 | 0,668 | 0,696 | 1 |
| Gm43915   | 0,557709 | 0,005604 | 0,015 | 0,011 | 1 |
| Pwp2      | 0,558438 | 0,021977 | 0,105 | 0,095 | 1 |
| Ifi35     | 0,558574 | 0,007906 | 0,073 | 0,084 | 1 |
| Nploc4    | 0,558644 | 0,012379 | 0,279 | 0,31  | 1 |
| Zc3h10    | 0,558774 | 0,026031 | 0,128 | 0,118 | 1 |
| Kcnn1     | 0,559128 | -0,00175 | 0,031 | 0,038 | 1 |
| Bag3      | 0,559269 | 0,06386  | 0,29  | 0,283 | 1 |
| Map3k1    | 0,55927  | -0,00706 | 0,029 | 0,036 | 1 |
| 2010015M  | 0,559513 | -0,00731 | 0,029 | 0,036 | 1 |
| Tox2      | 0,559554 | 0,0038   | 0,015 | 0,011 | 1 |
| AC160336. | 0,559639 | -0,08095 | 0,884 | 0,861 | 1 |
| Btbd6     | 0,55971  | 0,024394 | 0,16  | 0,148 | 1 |
| Pik3r2    | 0,559838 | 0,056395 | 0,328 | 0,333 | 1 |
| Fam193a   | 0,560072 | 0,034673 | 0,415 | 0,458 | 1 |
| Ppip5k1   | 0,560104 | 0,044629 | 0,248 | 0,238 | 1 |
| Pvt1      | 0,560153 | 0,020446 | 0,176 | 0,196 | 1 |
| Axin1     | 0,560291 | 0,017846 | 0,226 | 0,251 | 1 |
| G3bp1     | 0,561076 | 0,019217 | 0,594 | 0,652 | 1 |
| Nenf      | 0,561229 | 0,039221 | 0,877 | 0,878 | 1 |
| Wiz       | 0,561313 | 0,012682 | 0,317 | 0,348 | 1 |
| Rac3      | 0,561867 | -0,00378 | 0,031 | 0,038 | 1 |
| Nt5dc1    | 0,561991 | -0,00026 | 0,033 | 0,04  | 1 |
| Nqo2      | 0,562085 | -0,00326 | 0,031 | 0,038 | 1 |
| Ncoa5     | 0,562282 | 0,004461 | 0,158 | 0,175 | 1 |
| Ensa      | 0,562292 | 0,004359 | 0,563 | 0,631 | 1 |
| Peli3     | 0,562313 | -0,00149 | 0,031 | 0,038 | 1 |
| Slc25a20  | 0,562878 | 0,020248 | 0,048 | 0,057 | 1 |
| Zscan20   | 0,563047 | 0,00534  | 0,07  | 0,08  | 1 |
| Aff3      | 0,56306  | 0,02169  | 0,149 | 0,137 | 1 |
| Slc24a3   | 0,563348 | 0,018283 | 0,105 | 0,118 | 1 |
| Spty2d1   | 0,563591 | 0,063104 | 0,272 | 0,268 | 1 |
| Tbc1d17   | 0,563686 | 0,0192   | 0,556 | 0,616 | 1 |
| Vcpkmt    | 0,564097 | -0,0063  | 0,028 | 0,034 | 1 |
| Sec24b    | 0,564103 | 0,048764 | 0,327 | 0,376 | 1 |
| Homer1    | 0,564242 | 0,037714 | 0,206 | 0,232 | 1 |



|           |          |          |       |       |   |
|-----------|----------|----------|-------|-------|---|
| Man2c1os  | 0,564349 | -0,00656 | 0,028 | 0,034 | 1 |
| Prkar1a   | 0,565105 | -0,01508 | 0,98  | 0,966 | 1 |
| Slco2b1   | 0,565235 | 0,012256 | 0,04  | 0,034 | 1 |
| Adgra1    | 0,565319 | -0,00123 | 0,028 | 0,034 | 1 |
| Herc4     | 0,565642 | 0,01324  | 0,371 | 0,414 | 1 |
| Mtmr3     | 0,5658   | 0,021658 | 0,29  | 0,323 | 1 |
| Zfp827    | 0,566309 | 0,049912 | 0,163 | 0,154 | 1 |
| Pip5k1a   | 0,566497 | 0,021352 | 0,262 | 0,289 | 1 |
| Marveld1  | 0,566776 | -0,00274 | 0,029 | 0,036 | 1 |
| Dhx16     | 0,566861 | 0,027726 | 0,237 | 0,264 | 1 |
| Nr2c2     | 0,566895 | 0,046244 | 0,442 | 0,508 | 1 |
| Gm42893   | 0,567258 | -0,00123 | 0,029 | 0,036 | 1 |
| Evi5      | 0,567474 | 0,02643  | 0,083 | 0,074 | 1 |
| Tfeb      | 0,56791  | 0,062184 | 0,505 | 0,527 | 1 |
| Prps1     | 0,568122 | -0,01099 | 0,178 | 0,192 | 1 |
| Ltbp3     | 0,568285 | 0,011688 | 0,05  | 0,042 | 1 |
| Ewsr1     | 0,568548 | 0,026725 | 0,798 | 0,861 | 1 |
| Vps4b     | 0,568711 | 0,031632 | 0,538 | 0,601 | 1 |
| Slc9a1    | 0,568874 | -0,00518 | 0,176 | 0,192 | 1 |
| Slc30a4   | 0,569095 | 0,024291 | 0,242 | 0,27  | 1 |
| Cenpl     | 0,569183 | 0,008772 | 0,035 | 0,042 | 1 |
| Mbd5      | 0,569287 | 0,017183 | 0,211 | 0,234 | 1 |
| Ncln      | 0,569681 | 0,053241 | 0,514 | 0,536 | 1 |
| Npdc1     | 0,569748 | -0,00076 | 0,802 | 0,838 | 1 |
| Pacs1     | 0,569835 | -0,00452 | 0,026 | 0,032 | 1 |
| Ap2b1     | 0,570328 | 0,05966  | 0,655 | 0,707 | 1 |
| Rnf215    | 0,570389 | 0,012653 | 0,213 | 0,234 | 1 |
| Dbr1      | 0,570504 | -0,00372 | 0,108 | 0,12  | 1 |
| Dmtn      | 0,570761 | -0,00827 | 0,057 | 0,065 | 1 |
| Prkx      | 0,570777 | 0,036312 | 0,222 | 0,213 | 1 |
| Uhrf1bp1l | 0,570802 | 0,033693 | 0,147 | 0,137 | 1 |
| Ica1l     | 0,570824 | -0,005   | 0,006 | 0,008 | 1 |
| Dnhd1     | 0,570824 | -0,005   | 0,006 | 0,008 | 1 |
| Lrrc63    | 0,570824 | -0,005   | 0,006 | 0,008 | 1 |
| Gm26829   | 0,570824 | -0,005   | 0,006 | 0,008 | 1 |
| Kif19a    | 0,570824 | -0,00709 | 0,006 | 0,008 | 1 |
| Clic3     | 0,570824 | -0,01125 | 0,006 | 0,008 | 1 |
| Pde4dip   | 0,570848 | 0,02698  | 0,639 | 0,7   | 1 |
| Fbln1     | 0,571332 | -0,00527 | 0,006 | 0,008 | 1 |
| Star      | 0,571633 | -0,00248 | 0,028 | 0,034 | 1 |
| Cbln1     | 0,571633 | -0,00248 | 0,028 | 0,034 | 1 |
| Zfp213    | 0,571913 | 0,002907 | 0,123 | 0,137 | 1 |
| Fv1       | 0,572344 | -0,00291 | 0,006 | 0,008 | 1 |
| Rhof      | 0,572344 | -0,00291 | 0,006 | 0,008 | 1 |
| Fancd2    | 0,572344 | -0,00291 | 0,006 | 0,008 | 1 |
| Aldh1a3   | 0,572344 | -0,00291 | 0,006 | 0,008 | 1 |
| Cers3     | 0,572344 | -0,00291 | 0,006 | 0,008 | 1 |
| Rassf7    | 0,572344 | -0,00291 | 0,006 | 0,008 | 1 |
| Gm48935   | 0,572344 | -0,00291 | 0,006 | 0,008 | 1 |
| Gm26797   | 0,572344 | -0,00291 | 0,006 | 0,008 | 1 |
| Ccdc85a   | 0,572344 | -0,00291 | 0,006 | 0,008 | 1 |
| Gm26534   | 0,572344 | -0,00291 | 0,006 | 0,008 | 1 |

|           |          |          |       |       |   |
|-----------|----------|----------|-------|-------|---|
| Hist1h2bb | 0,572344 | -0,00291 | 0,006 | 0,008 | 1 |
| Gm48653   | 0,572344 | -0,00291 | 0,006 | 0,008 | 1 |
| AC140186. | 0,572344 | -0,00291 | 0,006 | 0,008 | 1 |
| Olfr107   | 0,572344 | -0,00291 | 0,006 | 0,008 | 1 |
| Slc1a1    | 0,572344 | -0,00291 | 0,006 | 0,008 | 1 |
| A93000711 | 0,572344 | -0,00291 | 0,006 | 0,008 | 1 |
| Gm16068   | 0,572344 | -0,00291 | 0,006 | 0,008 | 1 |
| Zan       | 0,572346 | -0,00527 | 0,006 | 0,008 | 1 |
| Pfkfb3    | 0,572475 | 0,022208 | 0,217 | 0,241 | 1 |
| Dpp8      | 0,572505 | 0,025663 | 0,417 | 0,466 | 1 |
| Hace1     | 0,572641 | 0,023023 | 0,253 | 0,241 | 1 |
| Arl8a     | 0,572717 | 0,015857 | 0,974 | 0,979 | 1 |
| Gm38944   | 0,572853 | -0,00318 | 0,006 | 0,008 | 1 |
| Alox8     | 0,572853 | -0,00318 | 0,006 | 0,008 | 1 |
| Gm12359   | 0,572853 | -0,00318 | 0,006 | 0,008 | 1 |
| Rgs11     | 0,572853 | -0,00318 | 0,006 | 0,008 | 1 |
| Tro       | 0,573284 | -0,01322 | 0,02  | 0,025 | 1 |
| Wdr25     | 0,573908 | -0,00579 | 0,024 | 0,03  | 1 |
| Far2os1   | 0,574376 | 0,002546 | 0,006 | 0,008 | 1 |
| Cdc25b    | 0,574376 | -0,00109 | 0,006 | 0,008 | 1 |
| Msx1      | 0,574376 | -0,00109 | 0,006 | 0,008 | 1 |
| Gabrb1    | 0,574376 | -0,00109 | 0,006 | 0,008 | 1 |
| Akr1b10   | 0,574376 | -0,00109 | 0,006 | 0,008 | 1 |
| Phldb3    | 0,574376 | -0,00109 | 0,006 | 0,008 | 1 |
| A230060F1 | 0,574376 | -0,00109 | 0,006 | 0,008 | 1 |
| Kcnh5     | 0,574376 | -0,00109 | 0,006 | 0,008 | 1 |
| Gm26785   | 0,574376 | -0,00109 | 0,006 | 0,008 | 1 |
| Ablim3    | 0,574376 | -0,00109 | 0,006 | 0,008 | 1 |
| 5930430LC | 0,574554 | 0,023531 | 0,061 | 0,053 | 1 |
| Eps8l1    | 0,574832 | 0,017425 | 0,061 | 0,053 | 1 |
| Smad2     | 0,575469 | 0,044243 | 0,165 | 0,158 | 1 |
| Armc8     | 0,575534 | 0,072392 | 0,295 | 0,3   | 1 |
| Rpl37     | 0,575727 | 0,005015 | 0,996 | 0,998 | 1 |
| Wdr6      | 0,576289 | 0,002571 | 0,028 | 0,034 | 1 |
| Gm960     | 0,576412 | 0,000729 | 0,006 | 0,008 | 1 |
| Cables1   | 0,576412 | 0,002546 | 0,006 | 0,008 | 1 |
| BC037034  | 0,577388 | -0,00372 | 0,108 | 0,12  | 1 |
| Zfp583    | 0,577533 | -0,00924 | 0,055 | 0,063 | 1 |
| Prmt6     | 0,578013 | -0,00185 | 0,108 | 0,12  | 1 |
| 6430550D  | 0,5781   | -0,00044 | 0,024 | 0,03  | 1 |
| Zcchc11   | 0,578358 | 0,045787 | 0,404 | 0,449 | 1 |
| Pcdhb3    | 0,578451 | 0,007975 | 0,006 | 0,008 | 1 |
| Mios      | 0,579164 | 0,009757 | 0,158 | 0,173 | 1 |
| Gm26649   | 0,579354 | 0,004064 | 0,029 | 0,036 | 1 |
| Cenps     | 0,579434 | -0,00478 | 0,026 | 0,032 | 1 |
| Zfp114    | 0,579942 | -0,00876 | 0,053 | 0,061 | 1 |
| Lca5      | 0,580388 | 0,023325 | 0,095 | 0,086 | 1 |
| Nfkb2     | 0,580836 | 0,013716 | 0,061 | 0,053 | 1 |
| Anp32e    | 0,581355 | 0,053106 | 0,642 | 0,679 | 1 |
| Tbc1d2    | 0,581517 | 0,001339 | 0,024 | 0,03  | 1 |
| Ppp1r26   | 0,581523 | -0,00248 | 0,024 | 0,03  | 1 |
| Lepr      | 0,58157  | -0,01587 | 0,007 | 0,011 | 1 |

|           |          |          |       |       |   |
|-----------|----------|----------|-------|-------|---|
| Gm26982   | 0,581817 | -0,00348 | 0,022 | 0,027 | 1 |
| Cnksr2    | 0,582105 | -0,00426 | 0,022 | 0,027 | 1 |
| Ppp4r3a   | 0,582286 | 0,082097 | 0,466 | 0,502 | 1 |
| Nup133    | 0,582416 | 0,015714 | 0,246 | 0,268 | 1 |
| Pkn2      | 0,582721 | 0,066485 | 0,622 | 0,65  | 1 |
| Maf1      | 0,582902 | 0,018007 | 0,574 | 0,656 | 1 |
| Synrg     | 0,583068 | -0,00128 | 0,635 | 0,681 | 1 |
| Rapgef1   | 0,583541 | 0,004971 | 0,2   | 0,219 | 1 |
| Gm19710   | 0,583826 | -0,00527 | 0,007 | 0,011 | 1 |
| Dynlrb2   | 0,583826 | -0,00527 | 0,007 | 0,011 | 1 |
| Slc29a2   | 0,584002 | 0,001339 | 0,026 | 0,032 | 1 |
| Tbc1d15   | 0,584033 | 0,022616 | 0,666 | 0,738 | 1 |
| Zfp455    | 0,584518 | 0,002842 | 0,026 | 0,032 | 1 |
| Ric8b     | 0,584738 | 0,020638 | 0,215 | 0,203 | 1 |
| Incenp    | 0,585049 | 0,018548 | 0,062 | 0,055 | 1 |
| Tab3      | 0,585053 | -0,00092 | 0,061 | 0,07  | 1 |
| Ifngr1    | 0,585308 | 0,016896 | 0,233 | 0,257 | 1 |
| Cmtm4     | 0,585466 | 0,036374 | 0,099 | 0,091 | 1 |
| Dcbld1    | 0,585634 | -0,00318 | 0,007 | 0,011 | 1 |
| Agap2     | 0,585634 | -0,00318 | 0,007 | 0,011 | 1 |
| Gm45733   | 0,585634 | -0,00318 | 0,007 | 0,011 | 1 |
| Gm11520   | 0,585634 | -0,00318 | 0,007 | 0,011 | 1 |
| Gm4211    | 0,585634 | -0,00318 | 0,007 | 0,011 | 1 |
| Zfp641    | 0,585634 | -0,00318 | 0,007 | 0,011 | 1 |
| Notch4    | 0,585634 | -0,00318 | 0,007 | 0,011 | 1 |
| Gm42669   | 0,58605  | 0,000362 | 0,02  | 0,025 | 1 |
| Ebf1      | 0,58609  | -0,00345 | 0,007 | 0,011 | 1 |
| 6030408B: | 0,58609  | -0,00345 | 0,007 | 0,011 | 1 |
| 1700020L2 | 0,586238 | 0,00326  | 0,061 | 0,07  | 1 |
| Pcdhb21   | 0,586477 | 0,026073 | 0,042 | 0,036 | 1 |
| Fgf9      | 0,586543 | -0,00163 | 0,007 | 0,011 | 1 |
| Mapk4     | 0,586543 | -0,00163 | 0,007 | 0,011 | 1 |
| Zfp991    | 0,586577 | 0,010126 | 0,024 | 0,019 | 1 |
| Gm48604   | 0,586577 | 0,010126 | 0,024 | 0,019 | 1 |
| Ecm1      | 0,586577 | 0,011907 | 0,024 | 0,019 | 1 |
| Cox7a1    | 0,586605 | -0,00476 | 0,018 | 0,023 | 1 |
| Pip5k1c   | 0,586703 | 0,012414 | 0,097 | 0,11  | 1 |
| Slc4a2    | 0,586873 | 0,033546 | 0,739 | 0,755 | 1 |
| Gm10037   | 0,586911 | -0,00502 | 0,018 | 0,023 | 1 |
| Pcdhga4   | 0,587166 | 0,013391 | 0,024 | 0,019 | 1 |
| Al429214  | 0,587231 | -0,00656 | 0,017 | 0,021 | 1 |
| Gigyf2    | 0,587571 | 0,051981 | 0,516 | 0,534 | 1 |
| Barx2     | 0,587821 | -0,00798 | 0,055 | 0,063 | 1 |
| Muc1      | 0,587902 | 0,002269 | 0,007 | 0,011 | 1 |
| 4932430I1 | 0,587902 | 0,000456 | 0,007 | 0,011 | 1 |
| Katnal2   | 0,587902 | 0,000456 | 0,007 | 0,011 | 1 |
| 1700084E1 | 0,587902 | -0,00136 | 0,007 | 0,011 | 1 |
| 1700112D: | 0,587902 | -0,00136 | 0,007 | 0,011 | 1 |
| Fam110b   | 0,587902 | -0,00136 | 0,007 | 0,011 | 1 |
| 2410021H: | 0,587902 | -0,00136 | 0,007 | 0,011 | 1 |
| Creb3l4   | 0,588357 | -0,00163 | 0,007 | 0,011 | 1 |
| Tspan32os | 0,588357 | -0,00163 | 0,007 | 0,011 | 1 |

|           |          |          |       |       |   |
|-----------|----------|----------|-------|-------|---|
| Chek1     | 0,588357 | -0,00163 | 0,007 | 0,011 | 1 |
| Gm45352   | 0,588357 | -0,00163 | 0,007 | 0,011 | 1 |
| Nrxn2     | 0,588392 | 0,008244 | 0,673 | 0,711 | 1 |
| Psm2      | 0,588548 | 0,037642 | 0,787 | 0,793 | 1 |
| 9630013A  | 0,588711 | -0,04463 | 0,009 | 0,013 | 1 |
| Ccdc96    | 0,588811 | 0,000183 | 0,007 | 0,011 | 1 |
| Rnf19a    | 0,589007 | 0,07558  | 0,338 | 0,346 | 1 |
| Coq4      | 0,589411 | 0,013329 | 0,172 | 0,19  | 1 |
| Sapcd1    | 0,589774 | 0,003386 | 0,022 | 0,027 | 1 |
| Qpct1     | 0,589865 | 0,009323 | 0,174 | 0,192 | 1 |
| Xk        | 0,589896 | -0,00116 | 0,018 | 0,023 | 1 |
| Rs1       | 0,589902 | -0,00348 | 0,018 | 0,023 | 1 |
| Hgs.1     | 0,58994  | -0,00553 | 0,009 | 0,013 | 1 |
| Gm4787    | 0,58994  | -0,00553 | 0,009 | 0,013 | 1 |
| D11Wsu47  | 0,59003  | -0,00872 | 0,075 | 0,084 | 1 |
| Pdlim7    | 0,590053 | -0,0045  | 0,017 | 0,021 | 1 |
| AC134548  | 0,590053 | -0,0045  | 0,017 | 0,021 | 1 |
| Kcne4     | 0,590173 | 0,01487  | 0,007 | 0,011 | 1 |
| Nfkbie    | 0,590173 | 0,002269 | 0,007 | 0,011 | 1 |
| Cdnf      | 0,590354 | -0,00579 | 0,009 | 0,013 | 1 |
| Nepro     | 0,591593 | -0,00605 | 0,051 | 0,059 | 1 |
| Ggt7      | 0,591629 | 0,035446 | 0,237 | 0,228 | 1 |
| Adam18    | 0,591901 | -0,00605 | 0,013 | 0,017 | 1 |
| Gm29183   | 0,591997 | -0,00345 | 0,009 | 0,013 | 1 |
| Ankrd42   | 0,591997 | -0,00345 | 0,009 | 0,013 | 1 |
| Gm48882   | 0,591997 | -0,00345 | 0,009 | 0,013 | 1 |
| Gm19935   | 0,591997 | -0,00345 | 0,009 | 0,013 | 1 |
| Gemin4    | 0,591997 | -0,00345 | 0,009 | 0,013 | 1 |
| Hist1h2ac | 0,591997 | -0,00345 | 0,009 | 0,013 | 1 |
| Dhrs11    | 0,592    | -0,00579 | 0,009 | 0,013 | 1 |
| Lman1     | 0,592001 | 0,033412 | 0,264 | 0,291 | 1 |
| Sycp3     | 0,592131 | -0,00579 | 0,011 | 0,015 | 1 |
| Atp2b2    | 0,592134 | -0,00812 | 0,011 | 0,015 | 1 |
| AL589692  | 0,592412 | -0,00371 | 0,009 | 0,013 | 1 |
| Adipor2   | 0,592495 | -0,01708 | 0,917 | 0,914 | 1 |
| Emilin1   | 0,592825 | -0,0019  | 0,009 | 0,013 | 1 |
| Kifc3     | 0,592839 | 0,038486 | 0,306 | 0,344 | 1 |
| Wdr78     | 0,592923 | 0,003934 | 0,02  | 0,025 | 1 |
| Ccl22     | 0,59301  | 0,006273 | 0,024 | 0,019 | 1 |
| Rbfox2    | 0,593062 | 0,016671 | 0,116 | 0,129 | 1 |
| Bcl2      | 0,593091 | -0,0045  | 0,015 | 0,019 | 1 |
| Pgc       | 0,593091 | -0,0045  | 0,015 | 0,019 | 1 |
| Fbxl12os  | 0,593203 | -0,0027  | 0,017 | 0,021 | 1 |
| Smg9      | 0,593423 | 0,036107 | 0,286 | 0,281 | 1 |
| Gm26779   | 0,593524 | -0,00296 | 0,017 | 0,021 | 1 |
| Fndc10    | 0,593668 | -0,00283 | 0,055 | 0,063 | 1 |
| Slc41a2   | 0,593891 | 0,011082 | 0,042 | 0,036 | 1 |
| Gm10118   | 0,594375 | -0,00397 | 0,013 | 0,017 | 1 |
| Cst6      | 0,5944   | 0,007493 | 0,018 | 0,023 | 1 |
| Gm44175   | 0,594407 | -0,00371 | 0,011 | 0,015 | 1 |
| Klk10     | 0,594407 | -0,00371 | 0,011 | 0,015 | 1 |
| Xylb      | 0,594407 | -0,00371 | 0,011 | 0,015 | 1 |

|            |          |          |       |       |   |
|------------|----------|----------|-------|-------|---|
| Dock2      | 0,594407 | -0,00371 | 0,011 | 0,015 | 1 |
| Gm9917     | 0,594473 | 0,001993 | 0,009 | 0,013 | 1 |
| Mgst1      | 0,594473 | -0,00163 | 0,009 | 0,013 | 1 |
| Slc1a4     | 0,594473 | -0,00163 | 0,009 | 0,013 | 1 |
| Zfp808     | 0,594473 | -0,00163 | 0,009 | 0,013 | 1 |
| Gm17035    | 0,594473 | -0,00163 | 0,009 | 0,013 | 1 |
| Hoxc8      | 0,594473 | -0,00163 | 0,009 | 0,013 | 1 |
| Mphosph8   | 0,594653 | 0,050544 | 0,558 | 0,627 | 1 |
| Fbxw4      | 0,594713 | 0,001212 | 0,134 | 0,148 | 1 |
| Gm26786    | 0,594889 | -0,0019  | 0,009 | 0,013 | 1 |
| Wars2      | 0,594892 | -0,00406 | 0,053 | 0,061 | 1 |
| Ate1       | 0,595115 | 0,029911 | 0,539 | 0,629 | 1 |
| Bard1      | 0,595171 | -0,00036 | 0,011 | 0,015 | 1 |
| Slc4a3     | 0,59522  | 0,010798 | 0,042 | 0,036 | 1 |
| Ylpm1      | 0,595333 | 0,025296 | 0,55  | 0,612 | 1 |
| Rpl13a-ps1 | 0,595355 | 0,006273 | 0,024 | 0,019 | 1 |
| Hykk       | 0,595649 | 0,004486 | 0,024 | 0,019 | 1 |
| Gm15492    | 0,595753 | -0,00063 | 0,015 | 0,019 | 1 |
| Gm4316     | 0,595753 | -0,00063 | 0,015 | 0,019 | 1 |
| Gm9958     | 0,595753 | -0,00243 | 0,015 | 0,019 | 1 |
| Bc1        | 0,595879 | 0,010234 | 0,042 | 0,036 | 1 |
| Tbp        | 0,595962 | 0,017673 | 0,165 | 0,154 | 1 |
| Gm7008     | 0,596091 | -0,0027  | 0,015 | 0,019 | 1 |
| Syn1       | 0,596342 | 0,000116 | 0,277 | 0,302 | 1 |
| Cep295nl   | 0,596424 | -0,0009  | 0,015 | 0,019 | 1 |
| Gng8       | 0,596562 | 0,105914 | 0,439 | 0,464 | 1 |
| Hoxa3      | 0,59672  | 0,008713 | 0,112 | 0,124 | 1 |
| Smarca5    | 0,596777 | 0,034205 | 0,895 | 0,88  | 1 |
| C230004F1  | 0,596954 | 0,000183 | 0,009 | 0,013 | 1 |
| Gstt2      | 0,596954 | 0,000183 | 0,009 | 0,013 | 1 |
| Cers1      | 0,596954 | 0,000183 | 0,009 | 0,013 | 1 |
| Ropn1l     | 0,596954 | 0,000183 | 0,009 | 0,013 | 1 |
| Gm5427     | 0,596954 | 0,001993 | 0,009 | 0,013 | 1 |
| Gm15747    | 0,597072 | 0,008913 | 0,011 | 0,015 | 1 |
| B230312C   | 0,597072 | 0,003522 | 0,011 | 0,015 | 1 |
| Tmsb15l    | 0,597072 | -0,0019  | 0,011 | 0,015 | 1 |
| 2310047Dl  | 0,597072 | -0,0019  | 0,011 | 0,015 | 1 |
| Spata33    | 0,597072 | -0,0019  | 0,011 | 0,015 | 1 |
| Zfp965     | 0,597215 | -0,00036 | 0,013 | 0,017 | 1 |
| Gm26590    | 0,597215 | -0,00216 | 0,013 | 0,017 | 1 |
| Phka2      | 0,597247 | 0,016366 | 0,147 | 0,162 | 1 |
| Nsun4      | 0,597397 | -0,0046  | 0,075 | 0,084 | 1 |
| Avl9       | 0,597998 | 0,018464 | 0,455 | 0,498 | 1 |
| Ptpn2      | 0,598205 | -0,00358 | 0,138 | 0,15  | 1 |
| 9230104M   | 0,598284 | 0,001173 | 0,013 | 0,017 | 1 |
| Pqlc2      | 0,598528 | 0,017575 | 0,185 | 0,173 | 1 |
| Acer3      | 0,598611 | 0,012722 | 0,11  | 0,124 | 1 |
| Mthfd2l    | 0,598686 | 0,019709 | 0,095 | 0,108 | 1 |
| Stxbp5     | 0,598783 | 0,01631  | 0,172 | 0,19  | 1 |
| Cramp1l    | 0,599013 | 0,03436  | 0,206 | 0,196 | 1 |
| Nudcd1     | 0,599093 | -0,00355 | 0,127 | 0,139 | 1 |
| Gm26516    | 0,599097 | -0,0009  | 0,015 | 0,019 | 1 |

|           |          |          |       |       |   |
|-----------|----------|----------|-------|-------|---|
| Mxi1      | 0,599389 | 0,059654 | 0,662 | 0,681 | 1 |
| Speer4b   | 0,599439 | 0,001993 | 0,009 | 0,013 | 1 |
| Retreg1   | 0,599453 | 0,001065 | 0,949 | 0,937 | 1 |
| 4933428G  | 0,599525 | 0,004486 | 0,017 | 0,021 | 1 |
| Gm16907   | 0,599525 | 0,002696 | 0,017 | 0,021 | 1 |
| Rin1      | 0,599743 | 0,001719 | 0,011 | 0,015 | 1 |
| Psmd3     | 0,599875 | 0,036683 | 0,75  | 0,759 | 1 |
| Tnip2     | 0,599955 | 0,022761 | 0,139 | 0,156 | 1 |
| Sin3a     | 0,599957 | 0,025854 | 0,233 | 0,257 | 1 |
| Pdia5     | 0,600063 | 0,000902 | 0,013 | 0,017 | 1 |
| 4930590JC | 0,600064 | 0,012785 | 0,017 | 0,013 | 1 |
| Nomo1     | 0,600087 | 0,025058 | 0,259 | 0,285 | 1 |
| Tgfb1i1   | 0,60027  | 0,003522 | 0,009 | 0,013 | 1 |
| Zfp575    | 0,600771 | -0,00143 | 0,015 | 0,019 | 1 |
| Zc3h4     | 0,60092  | 0,025398 | 0,25  | 0,274 | 1 |
| Snx8      | 0,601086 | 0,024582 | 0,283 | 0,316 | 1 |
| Lrp10     | 0,601125 | 0,019009 | 0,371 | 0,407 | 1 |
| Paip2b    | 0,601744 | -0,01449 | 0,4   | 0,445 | 1 |
| Zfp143    | 0,601887 | 0,028451 | 0,13  | 0,146 | 1 |
| Btd       | 0,601922 | 0,016886 | 0,145 | 0,16  | 1 |
| Rnf167    | 0,601954 | 0,052063 | 0,56  | 0,601 | 1 |
| Gm26772   | 0,602039 | 0,021602 | 0,011 | 0,015 | 1 |
| Bik       | 0,60211  | 0,000902 | 0,015 | 0,019 | 1 |
| Wdr62     | 0,602419 | 0,001719 | 0,011 | 0,015 | 1 |
| 1700086O  | 0,602502 | 0,004885 | 0,033 | 0,027 | 1 |
| Tes3-ps   | 0,602703 | 0,007302 | 0,042 | 0,036 | 1 |
| Primpol   | 0,602761 | 0,01018  | 0,033 | 0,027 | 1 |
| Cd83      | 0,60291  | 0,001446 | 0,013 | 0,017 | 1 |
| Rflnb     | 0,60291  | 0,003246 | 0,013 | 0,017 | 1 |
| Scn2a     | 0,602991 | -0,01127 | 0,046 | 0,053 | 1 |
| Trip6     | 0,603511 | 0,006099 | 0,033 | 0,027 | 1 |
| Gm12355   | 0,604024 | 0,008263 | 0,009 | 0,006 | 1 |
| Oaz3      | 0,604024 | 0,011873 | 0,009 | 0,006 | 1 |
| D630003M  | 0,604337 | 0,012785 | 0,017 | 0,013 | 1 |
| Dnase1l2  | 0,604791 | 0,004764 | 0,015 | 0,019 | 1 |
| Mss51     | 0,605099 | 0,003522 | 0,011 | 0,015 | 1 |
| Gspt2     | 0,605268 | 0,008318 | 0,086 | 0,097 | 1 |
| Flt3l     | 0,605485 | 0,006453 | 0,009 | 0,006 | 1 |
| Gm30606   | 0,605485 | 0,006453 | 0,009 | 0,006 | 1 |
| Nsl1      | 0,605485 | 0,011873 | 0,009 | 0,006 | 1 |
| Lrp3      | 0,605485 | 0,01007  | 0,009 | 0,006 | 1 |
| Gm37584   | 0,605485 | 0,008263 | 0,009 | 0,006 | 1 |
| Frrs1     | 0,605485 | 0,008263 | 0,009 | 0,006 | 1 |
| Gm16350   | 0,605485 | 0,008263 | 0,009 | 0,006 | 1 |
| Akt3      | 0,60588  | -0,00266 | 0,138 | 0,15  | 1 |
| Prkab1    | 0,60589  | 0,015379 | 0,119 | 0,11  | 1 |
| AC034116. | 0,605973 | 0,007975 | 0,009 | 0,006 | 1 |
| Gale      | 0,60646  | 0,005549 | 0,042 | 0,036 | 1 |
| Igfbpl1   | 0,60646  | 0,006169 | 0,009 | 0,006 | 1 |
| Zfp970    | 0,606469 | 0,011327 | 0,018 | 0,023 | 1 |
| Cr2       | 0,606478 | 0,016356 | 0,017 | 0,013 | 1 |
| Zfp781    | 0,606478 | 0,009201 | 0,017 | 0,013 | 1 |

|           |          |          |       |       |   |
|-----------|----------|----------|-------|-------|---|
| Gnrh1     | 0,606947 | 0,008263 | 0,009 | 0,006 | 1 |
| Prdm11    | 0,606947 | 0,006453 | 0,009 | 0,006 | 1 |
| Zfp711    | 0,606947 | 0,006453 | 0,009 | 0,006 | 1 |
| Gm15478   | 0,606947 | 0,006453 | 0,009 | 0,006 | 1 |
| Ampd3     | 0,606947 | 0,006453 | 0,009 | 0,006 | 1 |
| Hk1os     | 0,606947 | 0,006453 | 0,009 | 0,006 | 1 |
| Gm13528   | 0,606947 | 0,00464  | 0,009 | 0,006 | 1 |
| Gm28874   | 0,606947 | 0,00464  | 0,009 | 0,006 | 1 |
| 1500002C: | 0,606947 | 0,00464  | 0,009 | 0,006 | 1 |
| Fam221a   | 0,606947 | 0,00464  | 0,009 | 0,006 | 1 |
| Gm44702   | 0,606947 | 0,00464  | 0,009 | 0,006 | 1 |
| Gm44949   | 0,606947 | 0,00464  | 0,009 | 0,006 | 1 |
| 4930563J1 | 0,606947 | 0,00464  | 0,009 | 0,006 | 1 |
| Ppp1r27   | 0,606947 | 0,00464  | 0,009 | 0,006 | 1 |
| Ribc2     | 0,606947 | 0,00464  | 0,009 | 0,006 | 1 |
| Slc35g1   | 0,607924 | 0,004359 | 0,009 | 0,006 | 1 |
| Tmx4      | 0,608034 | 0,041015 | 0,49  | 0,546 | 1 |
| Sdc4      | 0,608145 | 0,049481 | 0,169 | 0,162 | 1 |
| Irak4     | 0,608314 | -0,00369 | 0,099 | 0,11  | 1 |
| Ipo5      | 0,608337 | 0,070113 | 0,576 | 0,608 | 1 |
| Gm9873    | 0,60841  | 0,002823 | 0,009 | 0,006 | 1 |
| Vegfd     | 0,60841  | 0,002823 | 0,009 | 0,006 | 1 |
| Gm26833   | 0,60841  | 0,002823 | 0,009 | 0,006 | 1 |
| Gm45351   | 0,60841  | 0,002823 | 0,009 | 0,006 | 1 |
| Lgals7    | 0,60841  | 0,002823 | 0,009 | 0,006 | 1 |
| Perp      | 0,60841  | 0,002823 | 0,009 | 0,006 | 1 |
| Jph3      | 0,60841  | 0,002823 | 0,009 | 0,006 | 1 |
| Mir17hg   | 0,60841  | 0,002823 | 0,009 | 0,006 | 1 |
| Tmppe     | 0,60841  | 0,002823 | 0,009 | 0,006 | 1 |
| Foxc1     | 0,60841  | 0,002823 | 0,009 | 0,006 | 1 |
| 4930461C: | 0,60841  | 0,002823 | 0,009 | 0,006 | 1 |
| Galm      | 0,60841  | 0,002823 | 0,009 | 0,006 | 1 |
| Ctf1      | 0,608622 | 0,009201 | 0,017 | 0,013 | 1 |
| Vstm2b    | 0,608622 | 0,005604 | 0,017 | 0,013 | 1 |
| Unc13a    | 0,608622 | 0,005604 | 0,017 | 0,013 | 1 |
| Nemp1     | 0,608658 | -0,00381 | 0,05  | 0,057 | 1 |
| Nf2       | 0,609097 | 0,049036 | 0,321 | 0,321 | 1 |
| Tbk1      | 0,609147 | 0,040317 | 0,261 | 0,255 | 1 |
| Gpx4      | 0,609215 | 0,026788 | 1     | 0,998 | 1 |
| Arhgap11a | 0,609345 | 0,008627 | 0,017 | 0,013 | 1 |
| Zfp148    | 0,609353 | 0,098271 | 0,494 | 0,54  | 1 |
| E2f1      | 0,609389 | 0,002546 | 0,009 | 0,006 | 1 |
| Tollip    | 0,609964 | -0,00159 | 0,455 | 0,5   | 1 |
| Ptpa      | 0,610197 | 0,025855 | 0,672 | 0,688 | 1 |
| Prc1      | 0,610849 | 0,017231 | 0,015 | 0,019 | 1 |
| Igf2r     | 0,611748 | -0,00293 | 0,191 | 0,209 | 1 |
| Usp28     | 0,611761 | 0,026727 | 0,092 | 0,084 | 1 |
| Fanci     | 0,61185  | 0,003522 | 0,017 | 0,013 | 1 |
| Lbhd1     | 0,61185  | 0,003522 | 0,017 | 0,013 | 1 |
| C730034FC | 0,611934 | 0,007746 | 0,062 | 0,055 | 1 |
| Erc4      | 0,612076 | -0,00198 | 0,172 | 0,188 | 1 |
| St18      | 0,612494 | 0,050584 | 0,806 | 0,827 | 1 |

|           |          |          |       |       |   |
|-----------|----------|----------|-------|-------|---|
| Sun1      | 0,613714 | 0,061219 | 0,374 | 0,388 | 1 |
| Bach1     | 0,613822 | 0,025441 | 0,345 | 0,38  | 1 |
| Zdhhc7    | 0,613837 | -0,00012 | 0,165 | 0,179 | 1 |
| Ccdc15    | 0,614375 | -0,00411 | 0,075 | 0,084 | 1 |
| Megf10    | 0,614418 | 0,048238 | 0,582 | 0,603 | 1 |
| Hsd11     | 0,61502  | 0,017397 | 0,229 | 0,253 | 1 |
| Rccd1     | 0,615487 | 0,032456 | 0,176 | 0,167 | 1 |
| Fam120c   | 0,615567 | 0,040193 | 0,209 | 0,203 | 1 |
| Zc3h3     | 0,615726 | 0,02806  | 0,112 | 0,103 | 1 |
| Rpl9-ps6  | 0,615885 | 0,011082 | 0,044 | 0,038 | 1 |
| Lima1     | 0,616939 | 0,024925 | 0,191 | 0,211 | 1 |
| Kbtbd2    | 0,616982 | 0,039901 | 0,299 | 0,295 | 1 |
| Zfp282    | 0,616988 | 0,039762 | 0,172 | 0,165 | 1 |
| Heca      | 0,617219 | 0,031957 | 0,297 | 0,327 | 1 |
| Gm10516   | 0,617243 | -0,00036 | 0,017 | 0,013 | 1 |
| Ints2     | 0,617573 | 0,002552 | 0,127 | 0,139 | 1 |
| Zfhx2     | 0,618646 | 0,017493 | 0,237 | 0,257 | 1 |
| Rps12-ps3 | 0,61876  | 0,011616 | 0,026 | 0,021 | 1 |
| Ube2h     | 0,618761 | 0,040548 | 0,697 | 0,713 | 1 |
| Snx2      | 0,618913 | 0,040921 | 0,464 | 0,525 | 1 |
| Sec24d    | 0,618967 | -0,0019  | 0,121 | 0,133 | 1 |
| Large1    | 0,619557 | 0,016535 | 0,077 | 0,07  | 1 |
| Usp35     | 0,619836 | 0,017742 | 0,125 | 0,116 | 1 |
| Dgcr2     | 0,620507 | 0,017733 | 0,365 | 0,407 | 1 |
| Atl1      | 0,620562 | 0,036228 | 0,389 | 0,437 | 1 |
| Rbm12     | 0,620605 | 0,003522 | 0,198 | 0,215 | 1 |
| Pxn       | 0,620621 | 0,012633 | 0,189 | 0,207 | 1 |
| Hsf1      | 0,620799 | 0,015704 | 0,253 | 0,274 | 1 |
| Pgm2      | 0,621002 | 0,012394 | 0,196 | 0,215 | 1 |
| Cxcr2     | 0,621344 | 0,009267 | 0,026 | 0,021 | 1 |
| S100a7a   | 0,621623 | 0,011616 | 0,026 | 0,021 | 1 |
| Map3k11   | 0,621675 | 0,060712 | 0,38  | 0,392 | 1 |
| Sertad3   | 0,621847 | 0,031405 | 0,143 | 0,135 | 1 |
| Gabpb2    | 0,621875 | 0,028701 | 0,367 | 0,403 | 1 |
| Serf1     | 0,62204  | 0,026031 | 0,114 | 0,105 | 1 |
| Sms       | 0,622206 | 0,047586 | 0,09  | 0,084 | 1 |
| Rwdd2a    | 0,62299  | 0,002859 | 0,051 | 0,059 | 1 |
| Gpatch1   | 0,623141 | -0,00687 | 0,2   | 0,213 | 1 |
| Xpc       | 0,623437 | 0,008964 | 0,147 | 0,16  | 1 |
| Cpeb4     | 0,623668 | 0,051659 | 0,705 | 0,722 | 1 |
| Xrn1      | 0,623883 | 0,07031  | 0,435 | 0,462 | 1 |
| 1110035H  | 0,624221 | 0,010751 | 0,026 | 0,021 | 1 |
| Fam126a   | 0,624393 | 0,060236 | 0,477 | 0,515 | 1 |
| B230311B  | 0,624492 | 0,008058 | 0,026 | 0,021 | 1 |
| Klk6      | 0,625771 | -0,32376 | 0,921 | 0,802 | 1 |
| Mark4     | 0,625877 | 0,03436  | 0,204 | 0,198 | 1 |
| Speer4a   | 0,626048 | 0,021215 | 0,046 | 0,04  | 1 |
| Pbxip1    | 0,626575 | 0,046751 | 0,189 | 0,184 | 1 |
| Krit1     | 0,626673 | 0,032645 | 0,761 | 0,829 | 1 |
| Cacnb1    | 0,626682 | 0,035733 | 0,059 | 0,053 | 1 |
| Orc3      | 0,627127 | 0,004334 | 0,171 | 0,186 | 1 |
| Srgap1    | 0,627193 | 0,087688 | 0,411 | 0,422 | 1 |



|          |          |          |       |       |   |
|----------|----------|----------|-------|-------|---|
| Xpo1     | 0,628013 | 0,08304  | 0,424 | 0,439 | 1 |
| Klf8     | 0,628222 | -0,0063  | 0,042 | 0,049 | 1 |
| Rbm43    | 0,628238 | 0,011327 | 0,026 | 0,021 | 1 |
| Zfp566   | 0,628491 | -0,00015 | 0,092 | 0,101 | 1 |
| Ccdc28a  | 0,628665 | 0,006232 | 0,077 | 0,086 | 1 |
| Hnrnpf   | 0,629117 | 0,039946 | 0,954 | 0,93  | 1 |
| Fubp3    | 0,629274 | 0,031136 | 0,505 | 0,58  | 1 |
| Gm7292   | 0,630073 | 0,006653 | 0,035 | 0,03  | 1 |
| Fkbp8    | 0,630283 | -0,00056 | 0,928 | 0,932 | 1 |
| Kdm3b    | 0,630345 | 0,049559 | 0,27  | 0,304 | 1 |
| Mta2     | 0,630428 | -0,00351 | 0,193 | 0,209 | 1 |
| Erich6   | 0,630552 | 0,003659 | 0,026 | 0,021 | 1 |
| Ibtk     | 0,630776 | 0,013979 | 0,328 | 0,354 | 1 |
| Mvk      | 0,631336 | 0,067896 | 0,418 | 0,437 | 1 |
| Pbx1     | 0,631683 | 0,092328 | 0,294 | 0,304 | 1 |
| Cklf     | 0,632147 | 0,003522 | 0,116 | 0,127 | 1 |
| Pfdn5    | 0,632441 | 0,005839 | 0,98  | 0,97  | 1 |
| Eprs     | 0,632612 | 0,017275 | 0,802 | 0,829 | 1 |
| Cnst     | 0,632786 | -0,009   | 0,127 | 0,137 | 1 |
| Thrap3   | 0,632938 | 0,041687 | 0,783 | 0,783 | 1 |
| Wdr34    | 0,632962 | -0,00285 | 0,132 | 0,143 | 1 |
| B3gnt9   | 0,633024 | 0,039881 | 0,404 | 0,445 | 1 |
| Mtfp1    | 0,633291 | 0,000707 | 0,042 | 0,049 | 1 |
| St6gal1  | 0,63335  | 0,091722 | 0,422 | 0,451 | 1 |
| Msantd2  | 0,63347  | 0,020371 | 0,152 | 0,167 | 1 |
| Shprh    | 0,633707 | 0,057002 | 0,448 | 0,513 | 1 |
| Snrk     | 0,633754 | 0,000568 | 0,156 | 0,169 | 1 |
| Noc2l    | 0,634807 | 0,048605 | 0,295 | 0,335 | 1 |
| Mapk14   | 0,635155 | 0,067357 | 0,264 | 0,268 | 1 |
| A730063M | 0,635342 | -0,00104 | 0,044 | 0,051 | 1 |
| Tjp1     | 0,635393 | 0,000916 | 0,688 | 0,688 | 1 |
| Ipo8     | 0,6359   | 0,062304 | 0,345 | 0,352 | 1 |
| Kansl2   | 0,6363   | 0,024362 | 0,319 | 0,35  | 1 |
| Zbtb40   | 0,636436 | 0,000523 | 0,07  | 0,078 | 1 |
| Dennd4a  | 0,636688 | 0,051376 | 0,484 | 0,561 | 1 |
| Fmnl2    | 0,637668 | 0,014884 | 0,899 | 0,897 | 1 |
| Dhx38    | 0,637888 | 0,028396 | 0,187 | 0,207 | 1 |
| Pvr      | 0,640217 | 0,009428 | 0,101 | 0,112 | 1 |
| Rtn4r    | 0,640921 | -0,00429 | 0,04  | 0,046 | 1 |
| Cpd      | 0,641411 | 0,041336 | 0,969 | 0,973 | 1 |
| Ppcdc    | 0,64154  | 0,010781 | 0,226 | 0,245 | 1 |
| Hspa4l   | 0,641737 | 0,02711  | 0,56  | 0,614 | 1 |
| Setmar   | 0,641821 | -0,0033  | 0,04  | 0,046 | 1 |
| Pcdhb20  | 0,642248 | 0,000349 | 0,075 | 0,068 | 1 |
| Gpkow    | 0,642323 | 0,016257 | 0,206 | 0,224 | 1 |
| Slc25a28 | 0,642607 | 0,011528 | 0,349 | 0,382 | 1 |
| Fndc3a   | 0,642764 | 0,065103 | 0,297 | 0,304 | 1 |
| Ybx1     | 0,642771 | 0,016379 | 0,985 | 0,981 | 1 |
| Fam3a    | 0,643187 | 0,030562 | 0,288 | 0,319 | 1 |
| Aftph    | 0,643203 | 0,047148 | 0,387 | 0,441 | 1 |
| Lipe     | 0,643231 | 0,065984 | 0,394 | 0,416 | 1 |
| Zcchc14  | 0,643397 | 0,054666 | 0,31  | 0,312 | 1 |

|            |          |          |       |       |   |
|------------|----------|----------|-------|-------|---|
| Dhx34      | 0,644056 | 0,003903 | 0,095 | 0,105 | 1 |
| Rdh10      | 0,644137 | 0,027325 | 0,081 | 0,074 | 1 |
| Cenpp      | 0,644184 | 0,008493 | 0,046 | 0,04  | 1 |
| Ddx39b     | 0,644436 | -0,00201 | 0,941 | 0,89  | 1 |
| Grk6       | 0,644466 | 0,025267 | 0,171 | 0,162 | 1 |
| Pemt       | 0,644538 | 0,011939 | 0,037 | 0,032 | 1 |
| Pdha1      | 0,644659 | 0,034775 | 0,569 | 0,572 | 1 |
| Blvrb      | 0,645263 | 0,019486 | 0,092 | 0,084 | 1 |
| Lurap1     | 0,645411 | 0,020647 | 0,259 | 0,285 | 1 |
| Morf4l2    | 0,645632 | 0,086735 | 0,723 | 0,77  | 1 |
| Api5       | 0,645645 | 0,019237 | 0,484 | 0,54  | 1 |
| Thap4      | 0,645674 | -0,00037 | 0,136 | 0,148 | 1 |
| Gm44623    | 0,645693 | -0,00227 | 0,04  | 0,046 | 1 |
| Anp32b     | 0,645794 | 0,015361 | 0,91  | 0,918 | 1 |
| Slc2a10    | 0,645971 | 0,005205 | 0,004 | 0,002 | 1 |
| Rnf207     | 0,645971 | 0,005205 | 0,004 | 0,002 | 1 |
| Lmod3      | 0,645971 | 0,005205 | 0,004 | 0,002 | 1 |
| Il4ra      | 0,645971 | 0,005205 | 0,004 | 0,002 | 1 |
| Cenph      | 0,645971 | 0,005205 | 0,004 | 0,002 | 1 |
| Gm20420    | 0,645971 | 0,005205 | 0,004 | 0,002 | 1 |
| Shank3     | 0,645971 | 0,005205 | 0,004 | 0,002 | 1 |
| Trank1     | 0,645971 | 0,014271 | 0,004 | 0,002 | 1 |
| Prss35     | 0,645971 | 0,008842 | 0,004 | 0,002 | 1 |
| Brsk2      | 0,646009 | 0,034892 | 0,321 | 0,361 | 1 |
| Ino80      | 0,64639  | 0,06297  | 0,343 | 0,354 | 1 |
| Cggbp1     | 0,646447 | 0,051388 | 0,596 | 0,641 | 1 |
| Usp47      | 0,646463 | 0,022874 | 0,4   | 0,437 | 1 |
| Zfp747     | 0,646742 | 0,019027 | 0,079 | 0,072 | 1 |
| H1f0       | 0,646758 | 0,062152 | 0,574 | 0,639 | 1 |
| Rln1       | 0,646787 | 0,008842 | 0,004 | 0,002 | 1 |
| Atrnl1     | 0,646787 | 0,008842 | 0,004 | 0,002 | 1 |
| Mme        | 0,646787 | 0,007025 | 0,004 | 0,002 | 1 |
| Kcnip4     | 0,646787 | 0,007025 | 0,004 | 0,002 | 1 |
| Adamts9    | 0,646787 | 0,007025 | 0,004 | 0,002 | 1 |
| Arhgef17   | 0,646787 | 0,007025 | 0,004 | 0,002 | 1 |
| Col5a2     | 0,646787 | 0,005205 | 0,004 | 0,002 | 1 |
| Cyr61      | 0,646787 | 0,005205 | 0,004 | 0,002 | 1 |
| Aqp1       | 0,646787 | 0,005205 | 0,004 | 0,002 | 1 |
| Cox6a2     | 0,646787 | 0,005205 | 0,004 | 0,002 | 1 |
| CT025678.  | 0,646787 | 0,005205 | 0,004 | 0,002 | 1 |
| Tnk1       | 0,646787 | 0,005205 | 0,004 | 0,002 | 1 |
| Copz2      | 0,646787 | 0,005205 | 0,004 | 0,002 | 1 |
| Fam84a     | 0,646787 | 0,005205 | 0,004 | 0,002 | 1 |
| Rgs6       | 0,646787 | 0,005205 | 0,004 | 0,002 | 1 |
| Pld5       | 0,646787 | 0,003382 | 0,004 | 0,002 | 1 |
| Capn8      | 0,646787 | 0,003382 | 0,004 | 0,002 | 1 |
| Enkur      | 0,646787 | 0,003382 | 0,004 | 0,002 | 1 |
| Slc2a6     | 0,646787 | 0,003382 | 0,004 | 0,002 | 1 |
| Erv3       | 0,646787 | 0,003382 | 0,004 | 0,002 | 1 |
| Gm26869    | 0,646787 | 0,003382 | 0,004 | 0,002 | 1 |
| Hist2h2aa2 | 0,646787 | 0,003382 | 0,004 | 0,002 | 1 |
| Hspb7      | 0,646787 | 0,003382 | 0,004 | 0,002 | 1 |

|           |          |          |       |       |   |
|-----------|----------|----------|-------|-------|---|
| Mmp23     | 0,646787 | 0,003382 | 0,004 | 0,002 | 1 |
| 4930548H: | 0,646787 | 0,003382 | 0,004 | 0,002 | 1 |
| Gm7854    | 0,646787 | 0,003382 | 0,004 | 0,002 | 1 |
| 1700124L1 | 0,646787 | 0,003382 | 0,004 | 0,002 | 1 |
| B430219N: | 0,646787 | 0,003382 | 0,004 | 0,002 | 1 |
| Dram1     | 0,646787 | 0,003382 | 0,004 | 0,002 | 1 |
| Nt5dc2    | 0,646787 | 0,003382 | 0,004 | 0,002 | 1 |
| Phyhip    | 0,646787 | 0,003382 | 0,004 | 0,002 | 1 |
| Plcd1     | 0,646787 | 0,003382 | 0,004 | 0,002 | 1 |
| Rcvrn     | 0,646787 | 0,003382 | 0,004 | 0,002 | 1 |
| Gm12319   | 0,646787 | 0,003382 | 0,004 | 0,002 | 1 |
| Gngt2     | 0,646787 | 0,003382 | 0,004 | 0,002 | 1 |
| Tmem106a  | 0,646787 | 0,003382 | 0,004 | 0,002 | 1 |
| 1810034E1 | 0,646787 | 0,003382 | 0,004 | 0,002 | 1 |
| AL591946. | 0,646787 | 0,003382 | 0,004 | 0,002 | 1 |
| Sh3bp1    | 0,646787 | 0,003382 | 0,004 | 0,002 | 1 |
| Gm27209   | 0,646787 | 0,003382 | 0,004 | 0,002 | 1 |
| Vpreb1    | 0,646787 | 0,003382 | 0,004 | 0,002 | 1 |
| Gm10226   | 0,646787 | 0,003382 | 0,004 | 0,002 | 1 |
| E230001N( | 0,646787 | 0,003382 | 0,004 | 0,002 | 1 |
| Cfap53    | 0,646787 | 0,003382 | 0,004 | 0,002 | 1 |
| Gal3st3   | 0,646787 | 0,003382 | 0,004 | 0,002 | 1 |
| Tmem72    | 0,647037 | 0,010704 | 0,018 | 0,015 | 1 |
| Gm49164   | 0,647037 | 0,012491 | 0,018 | 0,015 | 1 |
| Mob4      | 0,647145 | 0,02774  | 0,517 | 0,565 | 1 |
| Nek7      | 0,647519 | 0,00929  | 0,545 | 0,591 | 1 |
| 4930444P: | 0,647604 | 0,001556 | 0,004 | 0,002 | 1 |
| Rassf5    | 0,647604 | 0,001556 | 0,004 | 0,002 | 1 |
| Nek2      | 0,647604 | 0,001556 | 0,004 | 0,002 | 1 |
| Gm13479   | 0,647604 | 0,001556 | 0,004 | 0,002 | 1 |
| Olf1156   | 0,647604 | 0,001556 | 0,004 | 0,002 | 1 |
| Syt13     | 0,647604 | 0,001556 | 0,004 | 0,002 | 1 |
| Pax6      | 0,647604 | 0,001556 | 0,004 | 0,002 | 1 |
| Il1b      | 0,647604 | 0,001556 | 0,004 | 0,002 | 1 |
| Cfap61    | 0,647604 | 0,001556 | 0,004 | 0,002 | 1 |
| Trib3     | 0,647604 | 0,001556 | 0,004 | 0,002 | 1 |
| Tspyl3    | 0,647604 | 0,001556 | 0,004 | 0,002 | 1 |
| Cpne1     | 0,647604 | 0,001556 | 0,004 | 0,002 | 1 |
| Gm27206   | 0,647604 | 0,001556 | 0,004 | 0,002 | 1 |
| Pabpc1l   | 0,647604 | 0,001556 | 0,004 | 0,002 | 1 |
| Nfatc2    | 0,647604 | 0,001556 | 0,004 | 0,002 | 1 |
| Cdh4      | 0,647604 | 0,001556 | 0,004 | 0,002 | 1 |
| Srpx      | 0,647604 | 0,001556 | 0,004 | 0,002 | 1 |
| Gpr174    | 0,647604 | 0,001556 | 0,004 | 0,002 | 1 |
| Tmod4     | 0,647604 | 0,001556 | 0,004 | 0,002 | 1 |
| Tifa      | 0,647604 | 0,001556 | 0,004 | 0,002 | 1 |
| Gm40155   | 0,647604 | 0,001556 | 0,004 | 0,002 | 1 |
| Mpl       | 0,647604 | 0,001556 | 0,004 | 0,002 | 1 |
| Heyl      | 0,647604 | 0,001556 | 0,004 | 0,002 | 1 |
| Rhd       | 0,647604 | 0,001556 | 0,004 | 0,002 | 1 |
| Zfp993    | 0,647604 | 0,001556 | 0,004 | 0,002 | 1 |
| Fbxl13    | 0,647604 | 0,001556 | 0,004 | 0,002 | 1 |

|           |          |          |       |       |   |
|-----------|----------|----------|-------|-------|---|
| Jakmip1   | 0,647604 | 0,001556 | 0,004 | 0,002 | 1 |
| Cxcl10    | 0,647604 | 0,001556 | 0,004 | 0,002 | 1 |
| Gm26826   | 0,647604 | 0,001556 | 0,004 | 0,002 | 1 |
| Scnn1a    | 0,647604 | 0,001556 | 0,004 | 0,002 | 1 |
| Tmem145   | 0,647604 | 0,001556 | 0,004 | 0,002 | 1 |
| G630030JC | 0,647604 | 0,001556 | 0,004 | 0,002 | 1 |
| Gm15396   | 0,647604 | 0,001556 | 0,004 | 0,002 | 1 |
| Gm15635   | 0,647604 | 0,001556 | 0,004 | 0,002 | 1 |
| Gm35082   | 0,647604 | 0,001556 | 0,004 | 0,002 | 1 |
| Olfr633   | 0,647604 | 0,001556 | 0,004 | 0,002 | 1 |
| Olfr675   | 0,647604 | 0,001556 | 0,004 | 0,002 | 1 |
| Olfr715b  | 0,647604 | 0,001556 | 0,004 | 0,002 | 1 |
| Gm44773   | 0,647604 | 0,001556 | 0,004 | 0,002 | 1 |
| Hebp2     | 0,647604 | 0,001556 | 0,004 | 0,002 | 1 |
| Gm48249   | 0,647604 | 0,001556 | 0,004 | 0,002 | 1 |
| Tmem200a  | 0,647604 | 0,001556 | 0,004 | 0,002 | 1 |
| Pkib      | 0,647604 | 0,001556 | 0,004 | 0,002 | 1 |
| Cdk1      | 0,647604 | 0,001556 | 0,004 | 0,002 | 1 |
| Ptprb     | 0,647604 | 0,001556 | 0,004 | 0,002 | 1 |
| Stat6     | 0,647604 | 0,001556 | 0,004 | 0,002 | 1 |
| Rdh9      | 0,647604 | 0,001556 | 0,004 | 0,002 | 1 |
| AC117232. | 0,647604 | 0,001556 | 0,004 | 0,002 | 1 |
| Vmn2r87   | 0,647604 | 0,001556 | 0,004 | 0,002 | 1 |
| Col4a2    | 0,647604 | 0,001556 | 0,004 | 0,002 | 1 |
| Ank1      | 0,647604 | 0,001556 | 0,004 | 0,002 | 1 |
| Gm26721   | 0,647604 | 0,001556 | 0,004 | 0,002 | 1 |
| Gm21817   | 0,647604 | 0,001556 | 0,004 | 0,002 | 1 |
| Cdkn3     | 0,647604 | 0,001556 | 0,004 | 0,002 | 1 |
| Rec8      | 0,647604 | 0,001556 | 0,004 | 0,002 | 1 |
| 4930444M  | 0,647604 | 0,001556 | 0,004 | 0,002 | 1 |
| Scel      | 0,647604 | 0,001556 | 0,004 | 0,002 | 1 |
| Gm35835   | 0,647604 | 0,001556 | 0,004 | 0,002 | 1 |
| Exph5     | 0,647604 | 0,001556 | 0,004 | 0,002 | 1 |
| Gm38150   | 0,647604 | 0,001556 | 0,004 | 0,002 | 1 |
| Gfpt2     | 0,647604 | 0,001556 | 0,004 | 0,002 | 1 |
| Olfr30    | 0,647604 | 0,001556 | 0,004 | 0,002 | 1 |
| Mycbpap   | 0,647604 | 0,001556 | 0,004 | 0,002 | 1 |
| Plcd3     | 0,647604 | 0,001556 | 0,004 | 0,002 | 1 |
| Hist1h2bf | 0,647604 | 0,001556 | 0,004 | 0,002 | 1 |
| Gm47061   | 0,647604 | 0,001556 | 0,004 | 0,002 | 1 |
| Fbp1      | 0,647604 | 0,001556 | 0,004 | 0,002 | 1 |
| Gm4117    | 0,647604 | 0,001556 | 0,004 | 0,002 | 1 |
| Dtnbos    | 0,647604 | 0,001556 | 0,004 | 0,002 | 1 |
| AC163633. | 0,647604 | 0,001556 | 0,004 | 0,002 | 1 |
| AC164424. | 0,647604 | 0,001556 | 0,004 | 0,002 | 1 |
| Gm35558.  | 0,647604 | 0,001556 | 0,004 | 0,002 | 1 |
| Ptger4    | 0,647604 | 0,001556 | 0,004 | 0,002 | 1 |
| Baiap2l2  | 0,647604 | 0,001556 | 0,004 | 0,002 | 1 |
| Pced1b    | 0,647604 | 0,001556 | 0,004 | 0,002 | 1 |
| Hoxc10    | 0,647604 | 0,001556 | 0,004 | 0,002 | 1 |
| Hoxc5     | 0,647604 | 0,001556 | 0,004 | 0,002 | 1 |
| AC161607. | 0,647604 | 0,001556 | 0,004 | 0,002 | 1 |

|           |          |          |       |       |   |
|-----------|----------|----------|-------|-------|---|
| Abi3bp    | 0,647604 | 0,001556 | 0,004 | 0,002 | 1 |
| Tmem30c   | 0,647604 | 0,001556 | 0,004 | 0,002 | 1 |
| Cbr3      | 0,647604 | 0,001556 | 0,004 | 0,002 | 1 |
| 2310043M  | 0,647604 | 0,001556 | 0,004 | 0,002 | 1 |
| Tcf19     | 0,647604 | 0,001556 | 0,004 | 0,002 | 1 |
| Alk       | 0,647604 | 0,001556 | 0,004 | 0,002 | 1 |
| Pcdhb2    | 0,647604 | 0,001556 | 0,004 | 0,002 | 1 |
| Gm26742   | 0,647604 | 0,001556 | 0,004 | 0,002 | 1 |
| Stambpl1  | 0,647604 | 0,001556 | 0,004 | 0,002 | 1 |
| AW011738  | 0,647604 | 0,004922 | 0,004 | 0,002 | 1 |
| Ntrk3     | 0,647604 | 0,003102 | 0,004 | 0,002 | 1 |
| Nudt15    | 0,647755 | 0,000445 | 0,042 | 0,049 | 1 |
| Atp5a1    | 0,647911 | 0,010372 | 0,98  | 0,987 | 1 |
| Emilin2   | 0,648005 | 0,049458 | 0,461 | 0,487 | 1 |
| Epm2a     | 0,648051 | 0,016176 | 0,125 | 0,116 | 1 |
| Errfi1    | 0,648525 | 0,064169 | 0,62  | 0,648 | 1 |
| Gm20696   | 0,64916  | 0,011652 | 0,037 | 0,032 | 1 |
| Gdf9      | 0,649196 | 0,006749 | 0,046 | 0,04  | 1 |
| A030005L1 | 0,649239 | -0,00055 | 0,004 | 0,002 | 1 |
| Xlr4a     | 0,649239 | -0,00055 | 0,004 | 0,002 | 1 |
| Bcar3     | 0,649239 | -0,00055 | 0,004 | 0,002 | 1 |
| Mypopos   | 0,649239 | -0,00055 | 0,004 | 0,002 | 1 |
| Gm32913   | 0,649239 | -0,00055 | 0,004 | 0,002 | 1 |
| Gata6     | 0,649239 | -0,00265 | 0,004 | 0,002 | 1 |
| Cyp7b1    | 0,649239 | -0,00474 | 0,004 | 0,002 | 1 |
| Ntng1     | 0,649239 | -0,00474 | 0,004 | 0,002 | 1 |
| Gm47320   | 0,649456 | 0,008913 | 0,018 | 0,015 | 1 |
| Nutf2-ps1 | 0,649456 | 0,010704 | 0,018 | 0,015 | 1 |
| Zfp280c   | 0,649527 | 0,058825 | 0,461 | 0,527 | 1 |
| Ppp1r2    | 0,649901 | 0,063727 | 0,561 | 0,622 | 1 |
| Suco      | 0,650859 | 0,022438 | 0,411 | 0,451 | 1 |
| Paxip1    | 0,651156 | 0,037584 | 0,202 | 0,196 | 1 |
| Unc13b    | 0,651368 | 0,013168 | 0,068 | 0,061 | 1 |
| 9130221H  | 0,651825 | 0,01018  | 0,037 | 0,032 | 1 |
| Alpk2     | 0,651879 | 0,014275 | 0,018 | 0,015 | 1 |
| Gm16174   | 0,652118 | 0,011039 | 0,028 | 0,023 | 1 |
| Kctd11    | 0,652458 | 0,026342 | 0,136 | 0,129 | 1 |
| Arl15     | 0,65281  | 0,011652 | 0,037 | 0,032 | 1 |
| Ccdc136   | 0,653037 | 0,024346 | 0,25  | 0,27  | 1 |
| Mcmbp     | 0,653212 | 0,045344 | 0,495 | 0,511 | 1 |
| Nectin1   | 0,653266 | 0,044496 | 0,543 | 0,561 | 1 |
| D7Ert443  | 0,653879 | 0,009711 | 0,593 | 0,656 | 1 |
| Il18bp    | 0,654082 | 0,014867 | 0,028 | 0,023 | 1 |
| E530011L2 | 0,65411  | 0,00097  | 0,039 | 0,044 | 1 |
| Gfra1     | 0,654211 | -0,00583 | 0,145 | 0,156 | 1 |
| AC135964  | 0,654305 | 0,005323 | 0,018 | 0,015 | 1 |
| Arhgap12  | 0,654453 | 0,03803  | 0,259 | 0,285 | 1 |
| Cir1      | 0,65493  | 0,011773 | 0,607 | 0,673 | 1 |
| Far1      | 0,655076 | 0,045987 | 0,732 | 0,738 | 1 |
| Zfp280d   | 0,655173 | 0,075861 | 0,519 | 0,563 | 1 |
| Gm26606   | 0,655351 | 0,005043 | 0,018 | 0,015 | 1 |
| AC163720  | 0,655643 | 0,012256 | 0,048 | 0,042 | 1 |

|            |          |          |       |       |   |
|------------|----------|----------|-------|-------|---|
| Nop56      | 0,65594  | 0,077259 | 0,49  | 0,523 | 1 |
| Gm26798    | 0,65622  | 0,001921 | 0,04  | 0,046 | 1 |
| Hunk       | 0,65626  | 0,008842 | 0,044 | 0,051 | 1 |
| Slc23a1    | 0,656345 | 0,00516  | 0,028 | 0,023 | 1 |
| Xylt1      | 0,656468 | 0,013405 | 0,037 | 0,032 | 1 |
| Eif2ak3    | 0,656563 | 0,011177 | 0,2   | 0,215 | 1 |
| Hipk1      | 0,656746 | 0,057724 | 0,426 | 0,487 | 1 |
| Suv39h1    | 0,656895 | 0,025578 | 0,16  | 0,175 | 1 |
| Nfkbia     | 0,657019 | 0,064163 | 0,349 | 0,388 | 1 |
| Atp13a3    | 0,657316 | 0,051477 | 0,317 | 0,319 | 1 |
| Gm43796    | 0,657796 | 0,007459 | 0,092 | 0,101 | 1 |
| Rasgef1c   | 0,657838 | 0,020386 | 0,039 | 0,034 | 1 |
| Ankrd50    | 0,657951 | 0,023208 | 0,163 | 0,156 | 1 |
| Jup        | 0,658339 | 0,010083 | 0,837 | 0,873 | 1 |
| Nckap5l    | 0,658349 | -0,00026 | 0,039 | 0,044 | 1 |
| 2410089E   | 0,658441 | 0,031216 | 0,323 | 0,352 | 1 |
| Bcl3       | 0,659027 | -0,00466 | 0,086 | 0,095 | 1 |
| Lmo4       | 0,659786 | 0,037284 | 0,358 | 0,388 | 1 |
| Tshz3      | 0,66057  | 0,00297  | 0,018 | 0,015 | 1 |
| Syde2      | 0,660599 | 0,018456 | 0,083 | 0,076 | 1 |
| 9530034E1  | 0,661231 | 0,010234 | 0,048 | 0,042 | 1 |
| Zcchc4     | 0,661253 | 0,002907 | 0,116 | 0,127 | 1 |
| Mapre2     | 0,661346 | 0,001728 | 0,91  | 0,884 | 1 |
| Casp6      | 0,661429 | 0,005715 | 0,028 | 0,023 | 1 |
| Fpgs       | 0,661811 | -0,0044  | 0,103 | 0,112 | 1 |
| Dnajb2     | 0,661988 | 0,015757 | 1     | 0,994 | 1 |
| Orc5       | 0,662526 | 0,015312 | 0,176 | 0,192 | 1 |
| Usp6nl     | 0,663223 | 0,022196 | 0,294 | 0,319 | 1 |
| Bak1       | 0,663294 | -0,00807 | 0,242 | 0,257 | 1 |
| Gm10069    | 0,663305 | 0,004731 | 0,039 | 0,044 | 1 |
| Faap100    | 0,663443 | 0,047798 | 0,226 | 0,224 | 1 |
| Dync2h1    | 0,663574 | 0,028954 | 0,187 | 0,179 | 1 |
| Col11a2    | 0,663593 | 0,041715 | 0,233 | 0,255 | 1 |
| Arrdc1     | 0,663609 | 0,007939 | 0,048 | 0,042 | 1 |
| Brpf3      | 0,663736 | 0,023512 | 0,108 | 0,101 | 1 |
| Mtx3       | 0,663833 | 0,015581 | 0,158 | 0,171 | 1 |
| Lins1      | 0,664185 | 0,015688 | 0,083 | 0,076 | 1 |
| Ninl       | 0,664274 | 0,002842 | 0,028 | 0,023 | 1 |
| Spata31d1i | 0,664549 | 0,035911 | 0,178 | 0,173 | 1 |
| Prune1     | 0,664669 | 0,001895 | 0,106 | 0,116 | 1 |
| Zfp128     | 0,66469  | 0,010844 | 0,059 | 0,053 | 1 |
| Smarcd1    | 0,665192 | 0,047549 | 0,831 | 0,88  | 1 |
| Zfp865     | 0,665441 | 0,036477 | 0,194 | 0,215 | 1 |
| Cacna1c    | 0,66547  | 0,018646 | 0,039 | 0,034 | 1 |
| Zcchc2     | 0,665496 | 0,008656 | 0,147 | 0,16  | 1 |
| Naa15      | 0,665534 | 0,057169 | 0,571 | 0,629 | 1 |
| Hspa12a    | 0,665674 | -0,00326 | 0,035 | 0,04  | 1 |
| Gdap1l1    | 0,665727 | -0,00052 | 0,037 | 0,042 | 1 |
| Tbc1d31    | 0,666706 | 0,007109 | 0,11  | 0,12  | 1 |
| Zkscan17   | 0,666836 | 0,016194 | 0,097 | 0,108 | 1 |
| Gabpa      | 0,6678   | 0,057013 | 0,235 | 0,234 | 1 |
| Mapk6      | 0,668379 | 0,032985 | 0,371 | 0,411 | 1 |

|            |          |          |       |       |   |
|------------|----------|----------|-------|-------|---|
| Bri3bp     | 0,668717 | 0,013555 | 0,149 | 0,162 | 1 |
| Rbm27      | 0,66902  | 0,031072 | 0,431 | 0,481 | 1 |
| Sh3bgrl2   | 0,669778 | -0,01553 | 0,09  | 0,097 | 1 |
| Zfp661     | 0,670008 | -0,00478 | 0,033 | 0,038 | 1 |
| Abcc4      | 0,670043 | -0,0058  | 0,033 | 0,038 | 1 |
| Gramd4     | 0,670195 | 0,023033 | 0,136 | 0,129 | 1 |
| Zfp59      | 0,670262 | -0,00378 | 0,033 | 0,038 | 1 |
| Rap1gap    | 0,670283 | 0,015438 | 0,039 | 0,034 | 1 |
| Kif22      | 0,670667 | -0,00026 | 0,035 | 0,04  | 1 |
| Dcaf10     | 0,671119 | 0,03442  | 0,172 | 0,167 | 1 |
| Plaa       | 0,671208 | 0,020935 | 0,275 | 0,3   | 1 |
| Sh2d3c     | 0,671324 | 0,011579 | 0,011 | 0,008 | 1 |
| Med26      | 0,672018 | -0,00267 | 0,081 | 0,089 | 1 |
| Vegfb      | 0,672515 | 0,096932 | 0,47  | 0,5   | 1 |
| Fam72a     | 0,673147 | 0,007975 | 0,011 | 0,008 | 1 |
| Disp2      | 0,673147 | 0,011579 | 0,011 | 0,008 | 1 |
| Pcdh8      | 0,673147 | 0,009779 | 0,011 | 0,008 | 1 |
| Leng9      | 0,673698 | 0,001934 | 0,123 | 0,133 | 1 |
| Fbxw7      | 0,673943 | 0,030874 | 0,16  | 0,175 | 1 |
| Ssbp2      | 0,67395  | 0,026848 | 0,222 | 0,241 | 1 |
| Chaf1a     | 0,674106 | 0,011367 | 0,039 | 0,034 | 1 |
| Lats1      | 0,674873 | 0,054748 | 0,36  | 0,365 | 1 |
| Lyn        | 0,674972 | 0,006169 | 0,011 | 0,008 | 1 |
| Lin7b      | 0,674972 | 0,006169 | 0,011 | 0,008 | 1 |
| 17000480   | 0,674972 | 0,006169 | 0,011 | 0,008 | 1 |
| Gm10785    | 0,674972 | 0,006169 | 0,011 | 0,008 | 1 |
| Olfr90     | 0,674972 | 0,006169 | 0,011 | 0,008 | 1 |
| St6galnac2 | 0,674972 | 0,013376 | 0,011 | 0,008 | 1 |
| Rassf1     | 0,675061 | 0,067355 | 0,349 | 0,39  | 1 |
| Gm29417    | 0,675076 | 0,011082 | 0,039 | 0,034 | 1 |
| Gna11      | 0,675262 | 0,025865 | 0,758 | 0,808 | 1 |
| AY074887   | 0,67543  | 0,007689 | 0,011 | 0,008 | 1 |
| Gm49322    | 0,67547  | 0,017889 | 0,095 | 0,089 | 1 |
| Ints3      | 0,675483 | 0,036586 | 0,347 | 0,38  | 1 |
| Gga3       | 0,675567 | 0,03874  | 0,194 | 0,213 | 1 |
| Gm29994    | 0,675887 | 0,005886 | 0,011 | 0,008 | 1 |
| Gm27200    | 0,675897 | -0,00581 | 0,097 | 0,105 | 1 |
| Asah1      | 0,676259 | 0,01555  | 0,527 | 0,589 | 1 |
| Bcl9l      | 0,676284 | 0,004979 | 0,437 | 0,464 | 1 |
| March7     | 0,676604 | 0,084031 | 0,521 | 0,557 | 1 |
| Mapre3     | 0,676685 | 0,031302 | 0,561 | 0,622 | 1 |
| March9     | 0,676716 | 0,0064   | 0,064 | 0,072 | 1 |
| Gm26690    | 0,676799 | 0,004359 | 0,011 | 0,008 | 1 |
| AC154760   | 0,676799 | 0,004359 | 0,011 | 0,008 | 1 |
| Gm7628     | 0,676799 | 0,004359 | 0,011 | 0,008 | 1 |
| Lrrc14b    | 0,676799 | 0,004359 | 0,011 | 0,008 | 1 |
| 3110070M   | 0,676799 | 0,004359 | 0,011 | 0,008 | 1 |
| Coro2b     | 0,676986 | 0,062102 | 0,448 | 0,473 | 1 |
| Rab40c     | 0,677049 | 0,01372  | 0,473 | 0,523 | 1 |
| Cdk13      | 0,677619 | 0,080483 | 0,424 | 0,451 | 1 |
| Smg5       | 0,67762  | 0,039987 | 0,339 | 0,342 | 1 |
| Eps15l1    | 0,677638 | 0,019139 | 0,209 | 0,23  | 1 |

|           |          |          |       |       |   |
|-----------|----------|----------|-------|-------|---|
| Zmynd11   | 0,67765  | 0,041989 | 0,673 | 0,692 | 1 |
| Cxxc4     | 0,677715 | 0,004079 | 0,011 | 0,008 | 1 |
| Marf1     | 0,677958 | 0,056379 | 0,644 | 0,688 | 1 |
| Ppan      | 0,67834  | 0,033122 | 0,154 | 0,171 | 1 |
| Eif4e3    | 0,678372 | 0,027217 | 0,222 | 0,215 | 1 |
| Tbc1d8    | 0,678627 | 0,002546 | 0,011 | 0,008 | 1 |
| Kcnj13    | 0,678627 | 0,002546 | 0,011 | 0,008 | 1 |
| Thsd7b    | 0,678627 | 0,002546 | 0,011 | 0,008 | 1 |
| Gm5862    | 0,678627 | 0,002546 | 0,011 | 0,008 | 1 |
| Fam196a   | 0,678627 | 0,002546 | 0,011 | 0,008 | 1 |
| Gm26674   | 0,678627 | 0,002546 | 0,011 | 0,008 | 1 |
| Pate2     | 0,678627 | 0,002546 | 0,011 | 0,008 | 1 |
| Tlcd2     | 0,678627 | 0,002546 | 0,011 | 0,008 | 1 |
| Rhebl1    | 0,678679 | 0,00851  | 0,084 | 0,093 | 1 |
| Dpy19l3   | 0,679087 | 0,005886 | 0,011 | 0,008 | 1 |
| Col7a1    | 0,679087 | 0,004079 | 0,011 | 0,008 | 1 |
| Fut10     | 0,679104 | 0,014826 | 0,174 | 0,167 | 1 |
| Lrrc75b   | 0,679228 | 0,004895 | 0,105 | 0,114 | 1 |
| Gm21663   | 0,679545 | 0,002269 | 0,011 | 0,008 | 1 |
| Osbpl3    | 0,679545 | 0,002269 | 0,011 | 0,008 | 1 |
| Gmeb1     | 0,679613 | -0,01237 | 0,167 | 0,175 | 1 |
| Ndst2     | 0,680503 | 0,004816 | 0,081 | 0,074 | 1 |
| Raph1     | 0,680787 | 0,015863 | 0,128 | 0,12  | 1 |
| Arhgap25  | 0,68098  | 0,012807 | 0,029 | 0,025 | 1 |
| B130011K  | 0,681376 | -0,00163 | 0,011 | 0,008 | 1 |
| Cib2      | 0,681575 | 0,015757 | 0,02  | 0,017 | 1 |
| Socs4     | 0,681739 | 0,015906 | 0,257 | 0,274 | 1 |
| Zfp518b   | 0,682004 | 0,000614 | 0,059 | 0,065 | 1 |
| Rcc2      | 0,682542 | 0,068389 | 0,189 | 0,188 | 1 |
| Zfp229    | 0,683202 | 0,002302 | 0,033 | 0,038 | 1 |
| Cep85     | 0,683256 | 0,006618 | 0,152 | 0,165 | 1 |
| Rapsn     | 0,684125 | -0,00136 | 0,057 | 0,063 | 1 |
| 4931440F1 | 0,684129 | -0,00163 | 0,011 | 0,008 | 1 |
| Schip1    | 0,68421  | 0,049953 | 0,339 | 0,384 | 1 |
| lpmk      | 0,685146 | 0,031079 | 0,229 | 0,251 | 1 |
| Slc25a30  | 0,685487 | 0,04133  | 0,198 | 0,196 | 1 |
| Fancg     | 0,685641 | -0,00486 | 0,094 | 0,101 | 1 |
| Fyttd1    | 0,685681 | 0,051676 | 0,521 | 0,578 | 1 |
| Olfr889   | 0,685692 | 0,015448 | 0,029 | 0,025 | 1 |
| Atl3      | 0,685992 | 0,036176 | 0,36  | 0,397 | 1 |
| lft122    | 0,686361 | 0,011747 | 0,161 | 0,152 | 1 |
| Kcnh7     | 0,686924 | 0,010414 | 0,02  | 0,017 | 1 |
| Fam214b   | 0,686961 | 0,053634 | 0,262 | 0,266 | 1 |
| Gm40117   | 0,686967 | -0,00283 | 0,055 | 0,061 | 1 |
| Sall2     | 0,687004 | 0,018596 | 0,051 | 0,046 | 1 |
| Rab32     | 0,687617 | 0,007493 | 0,029 | 0,025 | 1 |
| Abcf1     | 0,687781 | 0,028279 | 0,699 | 0,755 | 1 |
| Slc30a5   | 0,687846 | 0,038103 | 0,301 | 0,297 | 1 |
| Mycbp2    | 0,688001 | 0,030706 | 0,894 | 0,897 | 1 |
| Elavl1    | 0,688341 | 0,003872 | 0,589 | 0,631 | 1 |
| Zfp316    | 0,688537 | 0,023554 | 0,191 | 0,184 | 1 |
| Jade3     | 0,688709 | 0,0015   | 0,031 | 0,036 | 1 |



|          |          |          |       |       |   |
|----------|----------|----------|-------|-------|---|
| Sipa1l2  | 0,688738 | 0,035302 | 0,242 | 0,238 | 1 |
| Slc6a1   | 0,688948 | 0,039454 | 0,626 | 0,641 | 1 |
| Dct      | 0,688965 | 0,002985 | 0,031 | 0,036 | 1 |
| Sh3bp2   | 0,689054 | 0,01917  | 0,163 | 0,156 | 1 |
| Tox4     | 0,689374 | 0,042112 | 0,44  | 0,492 | 1 |
| Enpp5    | 0,689582 | 0,028975 | 0,91  | 0,935 | 1 |
| Gm37065  | 0,689605 | 0,008627 | 0,02  | 0,017 | 1 |
| Al182371 | 0,689605 | 0,008627 | 0,02  | 0,017 | 1 |
| Arnt     | 0,689632 | 0,027807 | 0,345 | 0,371 | 1 |
| Engase   | 0,689832 | 0,014572 | 0,04  | 0,036 | 1 |
| Gm45902  | 0,690122 | 0,013706 | 0,037 | 0,042 | 1 |
| Hmgn1    | 0,690144 | 0,015941 | 0,56  | 0,601 | 1 |
| Bglap2   | 0,690282 | 0,014867 | 0,02  | 0,017 | 1 |
| Herc6    | 0,690861 | 0,053028 | 0,112 | 0,108 | 1 |
| Smoc1    | 0,691289 | 0,010574 | 0,108 | 0,118 | 1 |
| Pomc     | 0,692234 | 0,005823 | 0,031 | 0,036 | 1 |
| Zfp7     | 0,692234 | 0,005823 | 0,031 | 0,036 | 1 |
| Trpm4    | 0,692234 | 0,002302 | 0,031 | 0,036 | 1 |
| Gm9833   | 0,692289 | 0,006836 | 0,02  | 0,017 | 1 |
| Ccdc78   | 0,692289 | 0,006836 | 0,02  | 0,017 | 1 |
| Sbk3     | 0,692289 | 0,010414 | 0,02  | 0,017 | 1 |
| Srek1    | 0,692404 | 0,029735 | 0,642 | 0,696 | 1 |
| Slc17a5  | 0,69285  | 0,038574 | 0,266 | 0,295 | 1 |
| Znrf2    | 0,693093 | 0,029333 | 0,125 | 0,118 | 1 |
| Pard3    | 0,693278 | 0,050105 | 0,618 | 0,635 | 1 |
| Hdac9    | 0,694269 | 0,037352 | 0,108 | 0,103 | 1 |
| Erc2     | 0,69439  | 0,005072 | 0,149 | 0,16  | 1 |
| Adcy10   | 0,694976 | 0,005043 | 0,02  | 0,017 | 1 |
| Creb5    | 0,695553 | 0,048489 | 0,855 | 0,859 | 1 |
| Tnpo2    | 0,695985 | 0,038829 | 0,29  | 0,291 | 1 |
| BC043934 | 0,69599  | 0,004764 | 0,02  | 0,017 | 1 |
| Cdh2     | 0,696261 | 0,047559 | 0,747 | 0,791 | 1 |
| Prelid3a | 0,69638  | 0,020206 | 0,114 | 0,108 | 1 |
| AC152827 | 0,696544 | 0,004064 | 0,031 | 0,036 | 1 |
| M6pr     | 0,696974 | 0,01959  | 0,859 | 0,869 | 1 |
| Rnf225   | 0,697101 | 0,018302 | 0,051 | 0,046 | 1 |
| Peg10    | 0,697305 | -0,00642 | 0,239 | 0,249 | 1 |
| Cdv3     | 0,697351 | 0,025623 | 0,772 | 0,774 | 1 |
| Wnt5b    | 0,697371 | 0,004064 | 0,029 | 0,034 | 1 |
| Phf23    | 0,69739  | 0,05912  | 0,283 | 0,287 | 1 |
| Tmem64   | 0,69779  | 0,009428 | 0,083 | 0,091 | 1 |
| Mon1a    | 0,698101 | 0,022223 | 0,152 | 0,167 | 1 |
| Erich1   | 0,698449 | 0,030374 | 0,189 | 0,184 | 1 |
| Mthfr    | 0,698683 | 0,00297  | 0,02  | 0,017 | 1 |
| Wapl     | 0,699237 | 0,056956 | 0,628 | 0,669 | 1 |
| Phactr1  | 0,699838 | 0,02025  | 0,877 | 0,914 | 1 |
| A730011C | 0,700374 | -0,00143 | 0,02  | 0,017 | 1 |
| mt-Nd5   | 0,700389 | 0,035513 | 0,996 | 0,996 | 1 |
| Nudt8.1  | 0,701023 | 0,00107  | 0,029 | 0,034 | 1 |
| Rai1     | 0,701116 | 0,025341 | 0,128 | 0,122 | 1 |
| R3hdm2   | 0,701243 | 0,030652 | 0,574 | 0,637 | 1 |
| Erc1     | 0,701426 | 0,03218  | 0,167 | 0,162 | 1 |

|           |          |          |       |       |   |
|-----------|----------|----------|-------|-------|---|
| Ankrd37   | 0,702158 | 0,007205 | 0,057 | 0,063 | 1 |
| Atp6v1b2  | 0,703149 | 0,025658 | 0,604 | 0,662 | 1 |
| Arhgef19  | 0,703159 | 0,012092 | 0,073 | 0,068 | 1 |
| Diaph1    | 0,703577 | -0,00329 | 0,187 | 0,196 | 1 |
| Zfp689    | 0,703691 | -0,00181 | 0,05  | 0,055 | 1 |
| Serp2     | 0,70412  | 0,045437 | 0,156 | 0,152 | 1 |
| Cited2    | 0,70414  | 0,02884  | 0,066 | 0,061 | 1 |
| Naa25     | 0,704276 | 0,010051 | 0,163 | 0,177 | 1 |
| Exoc1     | 0,704427 | 0,048971 | 0,396 | 0,449 | 1 |
| Zfx       | 0,705023 | 0,035268 | 0,29  | 0,289 | 1 |
| Scai      | 0,705244 | 0,034503 | 0,2   | 0,219 | 1 |
| Spast     | 0,705326 | 0,031071 | 0,462 | 0,517 | 1 |
| Daxx      | 0,705668 | 0,032993 | 0,218 | 0,215 | 1 |
| Paqr9     | 0,705751 | 0,006099 | 0,029 | 0,034 | 1 |
| Klhl35    | 0,705823 | 0,021135 | 0,055 | 0,051 | 1 |
| Sugct     | 0,706209 | 0,005823 | 0,04  | 0,036 | 1 |
| Bambi     | 0,70688  | 0,021772 | 0,075 | 0,07  | 1 |
| Rps24     | 0,706965 | 0,032863 | 0,998 | 0,998 | 1 |
| Sde2      | 0,706968 | 0,024849 | 0,387 | 0,424 | 1 |
| Usp33     | 0,707127 | 0,049664 | 0,356 | 0,369 | 1 |
| Mtr       | 0,707348 | 0,029146 | 0,068 | 0,063 | 1 |
| Irs2      | 0,70772  | 0,019446 | 0,785 | 0,791 | 1 |
| Otud3     | 0,708252 | -0,004   | 0,026 | 0,03  | 1 |
| Rab11fip3 | 0,708413 | 0,041144 | 0,275 | 0,27  | 1 |
| Mia3      | 0,708937 | 0,030502 | 0,486 | 0,53  | 1 |
| B3gnt2    | 0,709023 | 0,010751 | 0,031 | 0,027 | 1 |
| Arhgap1   | 0,709244 | 0,0051   | 0,2   | 0,213 | 1 |
| Amy1      | 0,709699 | 0,01351  | 0,123 | 0,116 | 1 |
| Tef       | 0,710898 | 0,042569 | 0,561 | 0,599 | 1 |
| Ttc28     | 0,71092  | 0,01959  | 0,15  | 0,162 | 1 |
| Whrn      | 0,71093  | 0,002571 | 0,028 | 0,032 | 1 |
| Nfya      | 0,711744 | 0,029161 | 0,2   | 0,217 | 1 |
| Exoc6b    | 0,711748 | 0,009199 | 0,739 | 0,774 | 1 |
| Pcgf3     | 0,712276 | 0,058751 | 0,317 | 0,329 | 1 |
| Cdk20     | 0,712416 | 0,016003 | 0,053 | 0,049 | 1 |
| Hnrnpc    | 0,712473 | 0,016308 | 0,938 | 0,956 | 1 |
| Zbtb41    | 0,71252  | 0,035482 | 0,259 | 0,255 | 1 |
| Pelp1     | 0,712526 | 0,013083 | 0,18  | 0,194 | 1 |
| Zswim5    | 0,712549 | 0,008983 | 0,031 | 0,027 | 1 |
| Tmem202   | 0,712675 | 0,003522 | 0,04  | 0,036 | 1 |
| Gm9938    | 0,712809 | -0,00555 | 0,048 | 0,053 | 1 |
| Tcf7l2    | 0,713386 | 0,066205 | 0,288 | 0,293 | 1 |
| Cdk17     | 0,713427 | 0,028813 | 0,378 | 0,42  | 1 |
| Trmt2b    | 0,714066 | -0,0125  | 0,189 | 0,196 | 1 |
| Mark2     | 0,714217 | 0,019042 | 0,495 | 0,544 | 1 |
| Gm9774    | 0,714427 | 0,000183 | 0,05  | 0,055 | 1 |
| Gm26981   | 0,714454 | 0,018945 | 0,028 | 0,032 | 1 |
| Nkapl     | 0,714647 | 0,016313 | 0,031 | 0,036 | 1 |
| Gtdc1     | 0,715271 | 0,031173 | 0,239 | 0,234 | 1 |
| Kctd1     | 0,716117 | -0,00017 | 0,026 | 0,03  | 1 |
| Trim21    | 0,716553 | 0,007475 | 0,05  | 0,055 | 1 |
| Adnp2     | 0,716725 | 0,009652 | 0,138 | 0,148 | 1 |

|          |          |          |       |       |   |
|----------|----------|----------|-------|-------|---|
| Zbtb1    | 0,716871 | 0,049951 | 0,215 | 0,213 | 1 |
| Pan3     | 0,717098 | 0,056754 | 0,385 | 0,428 | 1 |
| Zdhhc8   | 0,717336 | 0,022301 | 0,264 | 0,287 | 1 |
| Lipa     | 0,717528 | 0,02367  | 0,517 | 0,57  | 1 |
| Dennd4c  | 0,717912 | 0,019073 | 0,176 | 0,169 | 1 |
| Telo2    | 0,717998 | 0,017093 | 0,165 | 0,177 | 1 |
| Zfp324   | 0,718699 | -0,00156 | 0,048 | 0,053 | 1 |
| C330007P | 0,718939 | 0,032962 | 0,479 | 0,53  | 1 |
| Gnpda1   | 0,719199 | 0,004101 | 0,176 | 0,188 | 1 |
| CAA0114  | 0,719618 | 0,007212 | 0,031 | 0,027 | 1 |
| Gm16287  | 0,71965  | 0,009332 | 0,042 | 0,038 | 1 |
| BC017158 | 0,719847 | 0,003124 | 0,05  | 0,055 | 1 |
| Gm49085  | 0,720634 | 0,004885 | 0,026 | 0,03  | 1 |
| Rnf169   | 0,720635 | 0,01917  | 0,154 | 0,167 | 1 |
| Med16    | 0,72189  | 0,062306 | 0,235 | 0,236 | 1 |
| Lin9     | 0,722091 | 0,007858 | 0,031 | 0,027 | 1 |
| Arc      | 0,722219 | 0,117873 | 0,341 | 0,382 | 1 |
| Casz1    | 0,722505 | -0,00222 | 0,024 | 0,027 | 1 |
| Gm7361   | 0,722505 | -0,00222 | 0,024 | 0,027 | 1 |
| Dennd1b  | 0,722798 | -0,0007  | 0,024 | 0,027 | 1 |
| Arl5a    | 0,722837 | 0,012914 | 0,505 | 0,546 | 1 |
| Flcn     | 0,722908 | 0,035709 | 0,283 | 0,31  | 1 |
| Uhrf2    | 0,723017 | 0,065685 | 0,505 | 0,549 | 1 |
| Myzap    | 0,723058 | -0,00654 | 0,05  | 0,044 | 1 |
| Sfxn4    | 0,723069 | 0,020692 | 0,079 | 0,074 | 1 |
| Rdh11    | 0,723373 | 0,061706 | 0,393 | 0,449 | 1 |
| Baz1a    | 0,723735 | 0,005823 | 0,031 | 0,027 | 1 |
| Ralgps1  | 0,723765 | 0,066173 | 0,549 | 0,591 | 1 |
| Baz2a    | 0,724951 | 0,021659 | 0,332 | 0,35  | 1 |
| Cipc     | 0,725613 | 0,007885 | 0,809 | 0,861 | 1 |
| Ugcg     | 0,725667 | 0,06938  | 0,191 | 0,192 | 1 |
| 49305181 | 0,725761 | 0,005275 | 0,042 | 0,038 | 1 |
| Trak1    | 0,726338 | 0,015877 | 0,139 | 0,133 | 1 |
| Gpd1l    | 0,726495 | 0,01624  | 0,215 | 0,228 | 1 |
| Phka1    | 0,727169 | 0,007364 | 0,112 | 0,12  | 1 |
| Poglut1  | 0,727323 | 0,031644 | 0,393 | 0,432 | 1 |
| Adprh    | 0,727913 | 0,015009 | 0,611 | 0,665 | 1 |
| Wipi2    | 0,728096 | 0,031654 | 0,561 | 0,605 | 1 |
| Hnrnp3   | 0,728214 | 0,034139 | 0,67  | 0,709 | 1 |
| Pias2    | 0,728259 | 0,048228 | 0,352 | 0,361 | 1 |
| Cobl     | 0,728363 | 0,090366 | 0,376 | 0,399 | 1 |
| Usp36    | 0,728761 | 0,024725 | 0,237 | 0,253 | 1 |
| Pdlim5   | 0,728805 | 0,018461 | 0,294 | 0,319 | 1 |
| Arhgef6  | 0,728871 | 0,007689 | 0,013 | 0,011 | 1 |
| Asf1b    | 0,728871 | 0,011286 | 0,013 | 0,011 | 1 |
| Gm4285   | 0,728885 | -7,7E-05 | 0,048 | 0,053 | 1 |
| Zfp654   | 0,728913 | 0,017797 | 0,189 | 0,181 | 1 |
| Zfp300   | 0,729123 | 0,010888 | 0,048 | 0,053 | 1 |
| Gm15462  | 0,729301 | 0,009201 | 0,013 | 0,011 | 1 |
| Rad51c   | 0,729301 | 0,009201 | 0,013 | 0,011 | 1 |
| Brca1    | 0,729329 | 0,013391 | 0,022 | 0,019 | 1 |
| Rgl2     | 0,729475 | 0,017575 | 0,178 | 0,171 | 1 |

|           |          |          |       |       |   |
|-----------|----------|----------|-------|-------|---|
| Mapk1     | 0,72949  | 0,029954 | 0,631 | 0,658 | 1 |
| AC123870. | 0,729579 | -0,00374 | 0,022 | 0,025 | 1 |
| Samd15    | 0,72973  | 0,007404 | 0,013 | 0,011 | 1 |
| Kdm4a     | 0,729813 | 0,029769 | 0,376 | 0,405 | 1 |
| Carmil3   | 0,729823 | -5,8E-05 | 0,108 | 0,116 | 1 |
| Slc29a3   | 0,730092 | 0,043382 | 0,418 | 0,462 | 1 |
| 9430060I0 | 0,730123 | 0,001878 | 0,024 | 0,027 | 1 |
| Gm37459   | 0,730123 | 0,001878 | 0,024 | 0,027 | 1 |
| Akap12    | 0,730128 | 0,030767 | 0,024 | 0,027 | 1 |
| Tob1      | 0,730355 | 0,023631 | 0,769 | 0,783 | 1 |
| Map3k2    | 0,73047  | 0,049035 | 0,35  | 0,39  | 1 |
| Washc5    | 0,730857 | 0,031333 | 0,25  | 0,27  | 1 |
| Pcdha4    | 0,731016 | 0,005886 | 0,013 | 0,011 | 1 |
| A830035O  | 0,731016 | 0,009489 | 0,013 | 0,011 | 1 |
| Atp6ap2   | 0,731143 | 0,034399 | 0,961 | 0,943 | 1 |
| Bdp1      | 0,731193 | 0,01701  | 0,336 | 0,371 | 1 |
| Gm16552   | 0,731447 | 0,010994 | 0,013 | 0,011 | 1 |
| Anks3     | 0,731576 | 0,026076 | 0,235 | 0,251 | 1 |
| Tor3a     | 0,731605 | 0,004764 | 0,022 | 0,019 | 1 |
| Nfkb1     | 0,731837 | 0,034503 | 0,2   | 0,217 | 1 |
| Ftx       | 0,73276  | 0,017851 | 0,09  | 0,084 | 1 |
| Smcr8     | 0,732867 | 0,028886 | 0,143 | 0,139 | 1 |
| Pnp2      | 0,733163 | 0,004079 | 0,013 | 0,011 | 1 |
| Olf93     | 0,733163 | 0,004079 | 0,013 | 0,011 | 1 |
| Kcnab2    | 0,733238 | -0,00143 | 0,022 | 0,025 | 1 |
| Asns      | 0,733238 | -0,00143 | 0,022 | 0,025 | 1 |
| Kank3     | 0,733238 | -0,00143 | 0,022 | 0,025 | 1 |
| Cd14      | 0,733595 | 0,005604 | 0,013 | 0,011 | 1 |
| Zzz3      | 0,733619 | 0,045207 | 0,556 | 0,586 | 1 |
| Rac1      | 0,73375  | 0,024124 | 0,996 | 0,989 | 1 |
| Zbtb48    | 0,734189 | 0,008172 | 0,07  | 0,076 | 1 |
| Wdsub1    | 0,734827 | 0,010976 | 0,209 | 0,222 | 1 |
| Map7d1    | 0,734957 | 0,029056 | 0,987 | 0,994 | 1 |
| Cog2      | 0,735074 | 0,008783 | 0,211 | 0,224 | 1 |
| Actr1a    | 0,735215 | 0,015836 | 0,833 | 0,827 | 1 |
| Ccdc169   | 0,735313 | 0,002269 | 0,013 | 0,011 | 1 |
| Stx1a     | 0,735313 | 0,002269 | 0,013 | 0,011 | 1 |
| Adam32    | 0,735313 | 0,002269 | 0,013 | 0,011 | 1 |
| B4galnt1  | 0,735503 | 0,006302 | 0,053 | 0,049 | 1 |
| Mob1b     | 0,735784 | 0,012054 | 0,16  | 0,171 | 1 |
| Gm15706   | 0,735887 | 0,022429 | 0,033 | 0,03  | 1 |
| Fgf1      | 0,736025 | 0,030994 | 0,631 | 0,665 | 1 |
| Hps5      | 0,736147 | 0,04105  | 0,215 | 0,213 | 1 |
| Mras      | 0,73617  | 0,002552 | 0,123 | 0,131 | 1 |
| 4930404N  | 0,736176 | 0,001993 | 0,013 | 0,011 | 1 |
| A930029G  | 0,736176 | 0,001993 | 0,013 | 0,011 | 1 |
| Ubr1      | 0,736853 | 0,064249 | 0,457 | 0,485 | 1 |
| Adam4     | 0,737531 | 0,003659 | 0,022 | 0,025 | 1 |
| Tdp1      | 0,737936 | 0,016671 | 0,13  | 0,141 | 1 |
| Hnrnpa1   | 0,738226 | 0,024551 | 0,835 | 0,819 | 1 |
| Gm6169    | 0,738328 | 0,000183 | 0,013 | 0,011 | 1 |
| Fn1       | 0,738411 | 0,013706 | 0,044 | 0,04  | 1 |

|           |          |          |       |       |   |
|-----------|----------|----------|-------|-------|---|
| Josd1     | 0,738568 | 0,001266 | 0,16  | 0,169 | 1 |
| Ppp1r21   | 0,738654 | 0,005342 | 0,679 | 0,717 | 1 |
| Chdh      | 0,738737 | 0,023747 | 0,229 | 0,245 | 1 |
| Sgtb      | 0,739051 | 0,002185 | 0,046 | 0,051 | 1 |
| Sorl1     | 0,739127 | 0,002259 | 0,681 | 0,711 | 1 |
| N4bp1     | 0,739571 | 0,027829 | 0,29  | 0,314 | 1 |
| Gm43848   | 0,739898 | 0,013816 | 0,154 | 0,165 | 1 |
| Zmym2     | 0,740513 | 0,059704 | 0,371 | 0,382 | 1 |
| Ucp2      | 0,74062  | -0,01142 | 0,02  | 0,023 | 1 |
| Cog3      | 0,741065 | 0,025391 | 0,217 | 0,211 | 1 |
| Fut9      | 0,741162 | 0,001449 | 0,044 | 0,049 | 1 |
| Xpo7      | 0,741236 | 0,042743 | 0,372 | 0,42  | 1 |
| Fnbp1     | 0,741597 | 0,001511 | 0,996 | 0,998 | 1 |
| Anapc4    | 0,742482 | 0,031401 | 0,312 | 0,34  | 1 |
| Accs      | 0,743348 | 0,011939 | 0,033 | 0,03  | 1 |
| 4930524JC | 0,744463 | -0,00116 | 0,02  | 0,023 | 1 |
| 4933433G  | 0,744467 | -0,00143 | 0,02  | 0,023 | 1 |
| Gm20517   | 0,744467 | -0,00143 | 0,02  | 0,023 | 1 |
| Edem3     | 0,744739 | 0,044384 | 0,231 | 0,232 | 1 |
| Virma     | 0,744904 | 0,024167 | 0,286 | 0,308 | 1 |
| Bora      | 0,745696 | 0,002478 | 0,066 | 0,072 | 1 |
| Srgap3    | 0,745792 | 0,039332 | 0,442 | 0,494 | 1 |
| Wwp2      | 0,745896 | 0,058322 | 0,349 | 0,354 | 1 |
| Ezh1      | 0,745995 | 0,037159 | 0,479 | 0,534 | 1 |
| Eef1a2    | 0,746009 | 0,025726 | 0,024 | 0,021 | 1 |
| Ano6      | 0,746009 | 0,020458 | 0,024 | 0,021 | 1 |
| Ifnar1    | 0,746115 | 0,016192 | 0,235 | 0,251 | 1 |
| Nmu       | 0,747058 | 0,013695 | 0,022 | 0,025 | 1 |
| Gm4737    | 0,747111 | 0,014286 | 0,057 | 0,053 | 1 |
| Med12     | 0,747716 | 0,027876 | 0,185 | 0,179 | 1 |
| BC051142  | 0,747975 | 0,007493 | 0,022 | 0,025 | 1 |
| Gm10638   | 0,747996 | 0,000632 | 0,02  | 0,023 | 1 |
| Gm10244   | 0,748    | 0,000362 | 0,02  | 0,023 | 1 |
| Atp7a     | 0,748046 | 0,015581 | 0,165 | 0,177 | 1 |
| Dgka      | 0,748164 | 0,006375 | 0,033 | 0,03  | 1 |
| Gm16052   | 0,748321 | 0,003934 | 0,02  | 0,023 | 1 |
| Gpam      | 0,74859  | 0,013994 | 0,046 | 0,042 | 1 |
| Mprp      | 0,748758 | 0,05052  | 0,644 | 0,703 | 1 |
| Lynx1     | 0,74915  | 0,020458 | 0,024 | 0,021 | 1 |
| Cln6      | 0,749486 | 0,00097  | 0,042 | 0,046 | 1 |
| Figl1     | 0,749491 | -0,00476 | 0,018 | 0,021 | 1 |
| Aifm2     | 0,749526 | 0,005909 | 0,105 | 0,112 | 1 |
| Onecut2   | 0,750314 | 0,093445 | 0,15  | 0,15  | 1 |
| Zc3h12b   | 0,750436 | -0,00781 | 0,04  | 0,044 | 1 |
| Dab2ip    | 0,750602 | 0,040518 | 0,387 | 0,422 | 1 |
| Ssh2      | 0,751191 | 0,044614 | 0,45  | 0,47  | 1 |
| Tmem136   | 0,751539 | 0,001878 | 0,02  | 0,023 | 1 |
| Sh3bp5    | 0,751552 | 0,013024 | 0,894 | 0,869 | 1 |
| Pcbp1     | 0,752083 | 0,019226 | 0,943 | 0,932 | 1 |
| Stk38l    | 0,752252 | 0,017041 | 0,198 | 0,192 | 1 |
| Armcx2    | 0,752261 | 0,02938  | 0,171 | 0,186 | 1 |
| Rasa2     | 0,752284 | 0,090993 | 0,24  | 0,249 | 1 |

|           |          |          |       |       |   |
|-----------|----------|----------|-------|-------|---|
| 4930550C: | 0,752863 | -0,00296 | 0,018 | 0,021 | 1 |
| Gm26563   | 0,752863 | -0,00296 | 0,018 | 0,021 | 1 |
| Gm15601   | 0,752866 | -0,00322 | 0,018 | 0,021 | 1 |
| Fdxacb1   | 0,753114 | 0,011208 | 0,139 | 0,15  | 1 |
| Ppp1r17   | 0,753203 | 9,42E-05 | 0,018 | 0,021 | 1 |
| Gm15688   | 0,753248 | 0,010612 | 0,068 | 0,063 | 1 |
| Dhx15     | 0,753305 | 0,053895 | 0,514 | 0,544 | 1 |
| 2810403A: | 0,753484 | 0,025601 | 0,288 | 0,31  | 1 |
| Lhfpl4    | 0,753643 | 0,025424 | 0,167 | 0,162 | 1 |
| Tubgcp4   | 0,753779 | 0,018017 | 0,239 | 0,255 | 1 |
| Capn2     | 0,753881 | 0,040365 | 0,486 | 0,551 | 1 |
| Nub1      | 0,753893 | 0,025456 | 0,594 | 0,637 | 1 |
| Pprc1     | 0,754196 | 0,010106 | 0,13  | 0,139 | 1 |
| Shisa8    | 0,754474 | 0,031602 | 0,266 | 0,283 | 1 |
| 2700081O: | 0,754513 | 0,000445 | 0,042 | 0,046 | 1 |
| Acss2     | 0,754641 | 0,066674 | 0,422 | 0,464 | 1 |
| Lrrc75a   | 0,755076 | 0,007774 | 0,02  | 0,023 | 1 |
| Gm26747   | 0,755443 | 0,011616 | 0,024 | 0,021 | 1 |
| Ralbp1    | 0,755469 | 0,047878 | 0,782 | 0,8   | 1 |
| Tmed8     | 0,75553  | 0,018781 | 0,136 | 0,131 | 1 |
| CT025619: | 0,755706 | 0,029353 | 0,222 | 0,238 | 1 |
| Atp5b     | 0,755894 | -0,00073 | 0,998 | 0,996 | 1 |
| Gucd1     | 0,755997 | 0,005447 | 0,086 | 0,093 | 1 |
| Plek      | 0,756235 | -0,0009  | 0,018 | 0,021 | 1 |
| Chtf18    | 0,756241 | -0,00143 | 0,018 | 0,021 | 1 |
| Chd2      | 0,756312 | 0,051643 | 0,394 | 0,437 | 1 |
| Tep1      | 0,756421 | 0,018646 | 0,086 | 0,093 | 1 |
| Trmt1     | 0,756504 | 0,044802 | 0,273 | 0,3   | 1 |
| Farp2     | 0,756743 | 0,001003 | 0,101 | 0,108 | 1 |
| Tmem87a   | 0,756811 | 0,042056 | 0,382 | 0,428 | 1 |
| Numbl     | 0,756835 | 0,021045 | 0,11  | 0,105 | 1 |
| Cyld      | 0,756886 | 0,017824 | 0,541 | 0,578 | 1 |
| Bahcc1    | 0,757707 | 0,028731 | 0,13  | 0,141 | 1 |
| Psmd1     | 0,758079 | 0,028548 | 0,73  | 0,741 | 1 |
| Ccnt1     | 0,758192 | 0,066106 | 0,442 | 0,513 | 1 |
| Ccdc159   | 0,758385 | 0,000445 | 0,042 | 0,046 | 1 |
| Dlc1      | 0,759334 | -0,00481 | 0,04  | 0,044 | 1 |
| Snhg11    | 0,759342 | 0,094948 | 0,116 | 0,127 | 1 |
| Dglucy    | 0,759616 | 0,000902 | 0,018 | 0,021 | 1 |
| Zfp964    | 0,759619 | 0,000632 | 0,018 | 0,021 | 1 |
| Usp22     | 0,759682 | 0,024333 | 0,853 | 0,833 | 1 |
| Cluh      | 0,759748 | 0,023383 | 0,174 | 0,171 | 1 |
| 4930509G: | 0,759805 | 0,007389 | 0,046 | 0,051 | 1 |
| Fkbp1a    | 0,759861 | 0,046826 | 0,987 | 0,979 | 1 |
| Egfl8     | 0,759957 | 0,013098 | 0,018 | 0,021 | 1 |
| Gm38642   | 0,760056 | 0,01051  | 0,187 | 0,198 | 1 |
| Plekha5   | 0,7604   | 0,02364  | 0,275 | 0,297 | 1 |
| Rnf43     | 0,760473 | 0,056718 | 0,213 | 0,23  | 1 |
| Plxnb2    | 0,760496 | 0,007493 | 0,024 | 0,021 | 1 |
| Cd164     | 0,760719 | 0,044888 | 0,492 | 0,519 | 1 |
| Atpif1    | 0,760784 | 0,03984  | 0,708 | 0,736 | 1 |
| Il1rap    | 0,761056 | 0,063184 | 0,868 | 0,876 | 1 |

|           |          |          |       |       |   |
|-----------|----------|----------|-------|-------|---|
| Zfp445    | 0,762124 | 0,006632 | 0,657 | 0,681 | 1 |
| Tmem91    | 0,762176 | 0,014867 | 0,02  | 0,023 | 1 |
| Ak5       | 0,762213 | -0,0045  | 0,017 | 0,019 | 1 |
| Ttc26     | 0,762388 | 0,007774 | 0,024 | 0,021 | 1 |
| Gm47438   | 0,762388 | 0,007774 | 0,024 | 0,021 | 1 |
| Mrps6     | 0,762498 | 0,060144 | 0,558 | 0,608 | 1 |
| Flna      | 0,7626   | 0,013521 | 0,13  | 0,124 | 1 |
| C78859    | 0,762814 | -0,0053  | 0,04  | 0,044 | 1 |
| Usp2      | 0,762859 | 0,027709 | 0,279 | 0,297 | 1 |
| Rab9b     | 0,763001 | 0,002696 | 0,018 | 0,021 | 1 |
| Nfxl1     | 0,763243 | 0,010408 | 0,139 | 0,133 | 1 |
| Gm13920   | 0,763343 | 0,004209 | 0,018 | 0,021 | 1 |
| Pcbp3     | 0,76335  | 0,006495 | 0,081 | 0,076 | 1 |
| Mdn1      | 0,763377 | 0,040924 | 0,266 | 0,268 | 1 |
| Tedc1     | 0,76354  | 0,008842 | 0,057 | 0,053 | 1 |
| Lad1      | 0,763647 | -0,00348 | 0,017 | 0,019 | 1 |
| D230025D  | 0,763865 | 0,056094 | 0,262 | 0,268 | 1 |
| Trip11    | 0,764348 | 0,005338 | 0,771 | 0,757 | 1 |
| Casc3     | 0,764349 | 0,056688 | 0,394 | 0,414 | 1 |
| Slc25a22  | 0,764417 | 0,018693 | 0,095 | 0,091 | 1 |
| Hist1h2ap | 0,764913 | 0,004486 | 0,024 | 0,021 | 1 |
| Zswim3    | 0,765421 | -0,00243 | 0,017 | 0,019 | 1 |
| Lrrc27    | 0,765421 | -0,00243 | 0,017 | 0,019 | 1 |
| Gm6793    | 0,766386 | 0,010362 | 0,006 | 0,004 | 1 |
| Pdp2      | 0,767066 | 0,030833 | 0,132 | 0,129 | 1 |
| Fam212b   | 0,767121 | 0,026812 | 0,185 | 0,181 | 1 |
| Mcub      | 0,767732 | 0,004922 | 0,006 | 0,004 | 1 |
| 1810019N  | 0,767732 | 0,004922 | 0,006 | 0,004 | 1 |
| Htr1b     | 0,767732 | 0,004922 | 0,006 | 0,004 | 1 |
| Prlr      | 0,767732 | 0,013972 | 0,006 | 0,004 | 1 |
| Gm14827   | 0,767732 | 0,010362 | 0,006 | 0,004 | 1 |
| Hist1h1d  | 0,767732 | 0,008552 | 0,006 | 0,004 | 1 |
| Gm16982   | 0,767732 | 0,006738 | 0,006 | 0,004 | 1 |
| Fgf18     | 0,767732 | 0,006738 | 0,006 | 0,004 | 1 |
| Rad9a     | 0,767828 | 0,028858 | 0,163 | 0,16  | 1 |
| Cep170    | 0,768302 | 0,032857 | 0,717 | 0,736 | 1 |
| B3glct    | 0,768395 | 0,022373 | 0,094 | 0,101 | 1 |
| Nrf1      | 0,768619 | 0,046751 | 0,194 | 0,196 | 1 |
| Gm28529   | 0,768637 | 0,001173 | 0,017 | 0,019 | 1 |
| Mamstr    | 0,76864  | -0,0009  | 0,017 | 0,019 | 1 |
| Nmt1      | 0,768982 | 0,027671 | 0,71  | 0,755 | 1 |
| Mcm10     | 0,769079 | 0,012168 | 0,006 | 0,004 | 1 |
| Adam1a    | 0,769079 | 0,010362 | 0,006 | 0,004 | 1 |
| Ttll8     | 0,769079 | 0,008552 | 0,006 | 0,004 | 1 |
| Rprm      | 0,769079 | 0,004922 | 0,006 | 0,004 | 1 |
| Fat4      | 0,769079 | 0,004922 | 0,006 | 0,004 | 1 |
| Gm37170   | 0,769079 | 0,004922 | 0,006 | 0,004 | 1 |
| Hrk       | 0,769079 | 0,004922 | 0,006 | 0,004 | 1 |
| Gprc5d    | 0,769079 | 0,004922 | 0,006 | 0,004 | 1 |
| Nynrin    | 0,769079 | 0,004922 | 0,006 | 0,004 | 1 |
| Gm33280   | 0,769079 | 0,003102 | 0,006 | 0,004 | 1 |
| 4933424G  | 0,769079 | 0,003102 | 0,006 | 0,004 | 1 |

|           |          |          |       |       |   |
|-----------|----------|----------|-------|-------|---|
| Gm17634   | 0,769079 | 0,003102 | 0,006 | 0,004 | 1 |
| Tstd1     | 0,769079 | 0,003102 | 0,006 | 0,004 | 1 |
| 2210411M  | 0,769079 | 0,003102 | 0,006 | 0,004 | 1 |
| Nox1      | 0,769079 | 0,003102 | 0,006 | 0,004 | 1 |
| Fam166b   | 0,769079 | 0,003102 | 0,006 | 0,004 | 1 |
| Fam229a   | 0,769079 | 0,003102 | 0,006 | 0,004 | 1 |
| Gm16503   | 0,769079 | 0,003102 | 0,006 | 0,004 | 1 |
| Gm38947   | 0,769079 | 0,003102 | 0,006 | 0,004 | 1 |
| Creb3l3   | 0,769079 | 0,003102 | 0,006 | 0,004 | 1 |
| Fhl4      | 0,769079 | 0,003102 | 0,006 | 0,004 | 1 |
| Slmapos2  | 0,769079 | 0,003102 | 0,006 | 0,004 | 1 |
| Olfm4     | 0,769079 | 0,003102 | 0,006 | 0,004 | 1 |
| Gm36198   | 0,769079 | 0,003102 | 0,006 | 0,004 | 1 |
| Pth1r     | 0,769079 | 0,003102 | 0,006 | 0,004 | 1 |
| 4930556J2 | 0,769079 | 0,003102 | 0,006 | 0,004 | 1 |
| Camkk1    | 0,769079 | 0,003102 | 0,006 | 0,004 | 1 |
| Rph3al    | 0,769079 | 0,003102 | 0,006 | 0,004 | 1 |
| Gm34868   | 0,769079 | 0,003102 | 0,006 | 0,004 | 1 |
| Gm16059   | 0,769079 | 0,003102 | 0,006 | 0,004 | 1 |
| Amhr2     | 0,769079 | 0,003102 | 0,006 | 0,004 | 1 |
| Impg2     | 0,769079 | 0,003102 | 0,006 | 0,004 | 1 |
| Mdga1     | 0,769079 | 0,003102 | 0,006 | 0,004 | 1 |
| Gm26722   | 0,769179 | 0,013168 | 0,068 | 0,074 | 1 |
| Cnm4      | 0,769406 | 0,031857 | 0,075 | 0,072 | 1 |
| Acvr1b    | 0,769665 | -0,00772 | 0,092 | 0,097 | 1 |
| Plcx1     | 0,769753 | 0,002823 | 0,006 | 0,004 | 1 |
| Nrbp2     | 0,769831 | 0,043348 | 0,943 | 0,945 | 1 |
| Setdb1    | 0,769844 | 0,036764 | 0,297 | 0,3   | 1 |
| Sh3bp4    | 0,770265 | 0,00326  | 0,062 | 0,068 | 1 |
| Mastl     | 0,770281 | 0,0015   | 0,04  | 0,044 | 1 |
| Gm16897   | 0,770427 | 0,001279 | 0,006 | 0,004 | 1 |
| Kn1       | 0,770427 | 0,001279 | 0,006 | 0,004 | 1 |
| Kcnq2     | 0,770427 | 0,001279 | 0,006 | 0,004 | 1 |
| Xlr4c     | 0,770427 | 0,001279 | 0,006 | 0,004 | 1 |
| Gm128     | 0,770427 | 0,001279 | 0,006 | 0,004 | 1 |
| Gm42957   | 0,770427 | 0,001279 | 0,006 | 0,004 | 1 |
| Gm43064   | 0,770427 | 0,001279 | 0,006 | 0,004 | 1 |
| Gm43825   | 0,770427 | 0,001279 | 0,006 | 0,004 | 1 |
| Msantd1   | 0,770427 | 0,001279 | 0,006 | 0,004 | 1 |
| Fzd10     | 0,770427 | 0,001279 | 0,006 | 0,004 | 1 |
| Gm10874   | 0,770427 | 0,001279 | 0,006 | 0,004 | 1 |
| Gm9008    | 0,770427 | 0,001279 | 0,006 | 0,004 | 1 |
| Eva1a     | 0,770427 | 0,001279 | 0,006 | 0,004 | 1 |
| Ccnd2     | 0,770427 | 0,001279 | 0,006 | 0,004 | 1 |
| Gm44686   | 0,770427 | 0,001279 | 0,006 | 0,004 | 1 |
| Wnt11     | 0,770427 | 0,001279 | 0,006 | 0,004 | 1 |
| Gm4353    | 0,770427 | 0,001279 | 0,006 | 0,004 | 1 |
| Gm47598   | 0,770427 | 0,001279 | 0,006 | 0,004 | 1 |
| Elk3      | 0,770427 | 0,001279 | 0,006 | 0,004 | 1 |
| 8030455M  | 0,770427 | 0,001279 | 0,006 | 0,004 | 1 |
| Il17d     | 0,770427 | 0,001279 | 0,006 | 0,004 | 1 |
| 4930594M  | 0,770427 | 0,001279 | 0,006 | 0,004 | 1 |



|           |          |          |       |       |   |
|-----------|----------|----------|-------|-------|---|
| Gm19531   | 0,770427 | 0,001279 | 0,006 | 0,004 | 1 |
| Gm5922    | 0,770427 | 0,001279 | 0,006 | 0,004 | 1 |
| Gm12212   | 0,770427 | 0,001279 | 0,006 | 0,004 | 1 |
| Gm17334   | 0,770427 | 0,001279 | 0,006 | 0,004 | 1 |
| Vmo1      | 0,770427 | 0,001279 | 0,006 | 0,004 | 1 |
| Ccl3      | 0,770427 | 0,001279 | 0,006 | 0,004 | 1 |
| Cdc6      | 0,770427 | 0,001279 | 0,006 | 0,004 | 1 |
| Gm11361   | 0,770427 | 0,001279 | 0,006 | 0,004 | 1 |
| A330048O  | 0,770427 | 0,001279 | 0,006 | 0,004 | 1 |
| Dok3      | 0,770427 | 0,001279 | 0,006 | 0,004 | 1 |
| Gm46332   | 0,770427 | 0,001279 | 0,006 | 0,004 | 1 |
| 9030624G  | 0,770427 | 0,001279 | 0,006 | 0,004 | 1 |
| Gm47096   | 0,770427 | 0,001279 | 0,006 | 0,004 | 1 |
| A230087F1 | 0,770427 | 0,001279 | 0,006 | 0,004 | 1 |
| 1700001LC | 0,770427 | 0,001279 | 0,006 | 0,004 | 1 |
| Gm4262    | 0,770427 | 0,001279 | 0,006 | 0,004 | 1 |
| Slc51a    | 0,770427 | 0,001279 | 0,006 | 0,004 | 1 |
| 3300005D  | 0,770427 | 0,001279 | 0,006 | 0,004 | 1 |
| Cchcr1    | 0,770427 | 0,001279 | 0,006 | 0,004 | 1 |
| Psd       | 0,770427 | 0,001279 | 0,006 | 0,004 | 1 |
| Xpot      | 0,770571 | 0,017015 | 0,194 | 0,205 | 1 |
| Csnk1g1   | 0,770604 | 0,051123 | 0,233 | 0,234 | 1 |
| Gm20449   | 0,771101 | 0,001003 | 0,006 | 0,004 | 1 |
| H2-Ab1    | 0,771101 | 0,001003 | 0,006 | 0,004 | 1 |
| Rasgrf1   | 0,771102 | 0,000729 | 0,006 | 0,004 | 1 |
| Npc2      | 0,771683 | 0,03153  | 0,993 | 0,983 | 1 |
| Eif3l     | 0,772409 | 0,018631 | 0,912 | 0,93  | 1 |
| 2700069I1 | 0,77245  | -0,00082 | 0,006 | 0,004 | 1 |
| Gm42984   | 0,77245  | -0,00082 | 0,006 | 0,004 | 1 |
| Srrm3     | 0,77245  | -0,00082 | 0,006 | 0,004 | 1 |
| Gm17039   | 0,77245  | -0,00082 | 0,006 | 0,004 | 1 |
| Prickle4  | 0,77245  | -0,00082 | 0,006 | 0,004 | 1 |
| Sema6b    | 0,77245  | -0,00082 | 0,006 | 0,004 | 1 |
| Lrtm1     | 0,77245  | -0,00291 | 0,006 | 0,004 | 1 |
| Gm17203   | 0,772577 | 0,002422 | 0,017 | 0,019 | 1 |
| Fbxo38    | 0,772987 | 0,044867 | 0,281 | 0,287 | 1 |
| Faxc      | 0,77396  | 0,011688 | 0,048 | 0,044 | 1 |
| Cttnbp2nl | 0,774213 | 0,029916 | 0,481 | 0,523 | 1 |
| Rnasek    | 0,774632 | 0,008216 | 0,042 | 0,046 | 1 |
| Lipt1     | 0,77508  | 0,00297  | 0,017 | 0,019 | 1 |
| Ccdc189   | 0,77508  | 0,00297  | 0,017 | 0,019 | 1 |
| Pkd2l2    | 0,77508  | 0,00297  | 0,017 | 0,019 | 1 |
| Tnr       | 0,77508  | 0,006554 | 0,017 | 0,019 | 1 |
| Adamtsl3  | 0,775128 | 0,012658 | 0,086 | 0,082 | 1 |
| Zdhhc15   | 0,775209 | 0,005003 | 0,04  | 0,044 | 1 |
| Itih5     | 0,775755 | 0,003192 | 0,167 | 0,175 | 1 |
| Tmc4      | 0,775799 | 0,006273 | 0,017 | 0,019 | 1 |
| Kri1      | 0,775831 | 0,023793 | 0,2   | 0,196 | 1 |
| Usp21     | 0,776025 | 0,007341 | 0,178 | 0,188 | 1 |
| Exoc5     | 0,776086 | 0,029784 | 0,574 | 0,593 | 1 |
| Zfp532    | 0,776952 | 0,037322 | 0,527 | 0,597 | 1 |
| Qrich1    | 0,777377 | 0,041828 | 0,372 | 0,407 | 1 |

|           |          |          |       |       |   |
|-----------|----------|----------|-------|-------|---|
| Lta4h     | 0,77781  | 0,03999  | 0,433 | 0,449 | 1 |
| Slco2a1   | 0,777888 | 0,009201 | 0,015 | 0,013 | 1 |
| Ap5b1     | 0,777888 | 0,005604 | 0,015 | 0,013 | 1 |
| Cbl       | 0,778061 | 0,066177 | 0,567 | 0,624 | 1 |
| Abcc10    | 0,77844  | 0,006589 | 0,079 | 0,084 | 1 |
| Lrrn4cl   | 0,778668 | 0,006273 | 0,017 | 0,019 | 1 |
| Snip1     | 0,779213 | 0,015328 | 0,169 | 0,179 | 1 |
| Paqr4     | 0,779304 | 0,014572 | 0,572 | 0,622 | 1 |
| Dact3     | 0,779378 | 0,054013 | 0,747 | 0,804 | 1 |
| Pop1      | 0,779481 | 0,026727 | 0,077 | 0,074 | 1 |
| Myo7a     | 0,779514 | 0,005043 | 0,015 | 0,013 | 1 |
| Sel1l     | 0,780083 | 0,054442 | 0,783 | 0,791 | 1 |
| 9330102EC | 0,780322 | 0,0038   | 0,015 | 0,013 | 1 |
| Hyal3     | 0,780322 | 0,0038   | 0,015 | 0,013 | 1 |
| B130046B  | 0,780322 | 0,0038   | 0,015 | 0,013 | 1 |
| Sgms2     | 0,780672 | 0,018511 | 0,136 | 0,131 | 1 |
| Arsa      | 0,780806 | 0,032496 | 0,338 | 0,369 | 1 |
| Chst10    | 0,781137 | 0,003522 | 0,015 | 0,013 | 1 |
| Prps1l3   | 0,781462 | 0,003253 | 0,039 | 0,042 | 1 |
| Dusp14    | 0,781538 | 0,011907 | 0,017 | 0,019 | 1 |
| Tnfsfm13  | 0,781778 | -0,00036 | 0,015 | 0,017 | 1 |
| Mfsd2b    | 0,781778 | -0,00036 | 0,015 | 0,017 | 1 |
| Kctd20    | 0,781878 | 0,032109 | 0,283 | 0,308 | 1 |
| Polr1e    | 0,781973 | 0,016632 | 0,026 | 0,023 | 1 |
| Usp1      | 0,782326 | 0,038308 | 0,319 | 0,348 | 1 |
| Rab7      | 0,782459 | 0,03112  | 0,991 | 0,989 | 1 |
| Shf       | 0,782472 | 0,01346  | 0,084 | 0,08  | 1 |
| 1700086P  | 0,782759 | 0,001993 | 0,015 | 0,013 | 1 |
| Olfr1385  | 0,782759 | 0,001993 | 0,015 | 0,013 | 1 |
| 5033430l1 | 0,782759 | 0,001993 | 0,015 | 0,013 | 1 |
| Hectd3    | 0,782883 | 0,012416 | 0,213 | 0,226 | 1 |
| Dis3      | 0,782936 | 0,010497 | 0,147 | 0,154 | 1 |
| Zfp493    | 0,783187 | 0,011688 | 0,048 | 0,044 | 1 |
| Rnf145    | 0,783378 | 0,018488 | 0,246 | 0,259 | 1 |
| Ccdc149   | 0,783574 | 0,001719 | 0,015 | 0,013 | 1 |
| Morn1     | 0,783673 | -0,00149 | 0,037 | 0,04  | 1 |
| R3hdm4    | 0,783939 | 0,060898 | 0,618 | 0,669 | 1 |
| Klhl8     | 0,784233 | 0,003522 | 0,172 | 0,181 | 1 |
| Zfp273    | 0,784241 | 0,03014  | 0,094 | 0,091 | 1 |
| Rab5c     | 0,784442 | 0,004787 | 0,848 | 0,844 | 1 |
| Map3k3    | 0,784473 | 0,012782 | 0,154 | 0,162 | 1 |
| Tigd5     | 0,78464  | 0,009614 | 0,037 | 0,034 | 1 |
| Fbxo6     | 0,784685 | 0,009082 | 0,176 | 0,186 | 1 |
| Aim2      | 0,784825 | 0,003246 | 0,015 | 0,017 | 1 |
| Glb1l     | 0,785337 | 0,009552 | 0,026 | 0,023 | 1 |
| Rnf217    | 0,785337 | 0,011327 | 0,026 | 0,023 | 1 |
| Gm13075   | 0,785619 | -0,00982 | 0,035 | 0,038 | 1 |
| Pcnt      | 0,785766 | 0,015662 | 0,27  | 0,285 | 1 |
| Pkmyt1    | 0,786396 | 0,007282 | 0,101 | 0,108 | 1 |
| Klk8      | 0,786721 | 0,097201 | 0,059 | 0,055 | 1 |
| Slc38a7   | 0,786917 | 0,017937 | 0,149 | 0,158 | 1 |
| Rpl32     | 0,78744  | 0,039944 | 0,987 | 0,987 | 1 |

|          |          |          |       |       |   |
|----------|----------|----------|-------|-------|---|
| Sema3d   | 0,787796 | 0,012338 | 0,061 | 0,057 | 1 |
| Sema6c   | 0,787875 | 0,003246 | 0,015 | 0,017 | 1 |
| Pttg1ip  | 0,788122 | 0,021868 | 0,69  | 0,738 | 1 |
| Zc3h12a  | 0,78815  | 0,000614 | 0,057 | 0,061 | 1 |
| Gm26603  | 0,788258 | 0,004764 | 0,015 | 0,017 | 1 |
| Nolc1    | 0,789138 | 0,060318 | 0,354 | 0,367 | 1 |
| Stag2    | 0,789312 | 0,036054 | 0,738 | 0,764 | 1 |
| Nup50    | 0,789373 | 0,072392 | 0,292 | 0,312 | 1 |
| Washc2   | 0,789465 | 0,041482 | 0,908 | 0,911 | 1 |
| Itga8    | 0,789628 | 0,007493 | 0,026 | 0,023 | 1 |
| Rps2     | 0,789716 | 0,0802   | 0,993 | 0,992 | 1 |
| Zfp12    | 0,78972  | 0,007949 | 0,123 | 0,131 | 1 |
| Rrp1     | 0,789828 | 0,025031 | 0,844 | 0,865 | 1 |
| Cacng5   | 0,790038 | 0,01602  | 0,037 | 0,034 | 1 |
| Mark3    | 0,79024  | 0,056803 | 0,598 | 0,65  | 1 |
| Evi5l    | 0,790461 | 0,040347 | 0,413 | 0,46  | 1 |
| Ifngr2   | 0,790476 | 0,017607 | 0,088 | 0,084 | 1 |
| Dpp6     | 0,790498 | -0,00476 | 0,013 | 0,015 | 1 |
| Lrrc29   | 0,790928 | 0,008627 | 0,015 | 0,017 | 1 |
| Gcc1     | 0,791239 | 0,049216 | 0,13  | 0,129 | 1 |
| Ppp2r5e  | 0,791371 | 0,037004 | 0,358 | 0,373 | 1 |
| Dedd2    | 0,791622 | 0,037863 | 0,189 | 0,2   | 1 |
| Angel1   | 0,791739 | 0,009634 | 0,099 | 0,095 | 1 |
| Slc26a2  | 0,791841 | 0,026799 | 0,161 | 0,173 | 1 |
| Brdt     | 0,792341 | 0,030089 | 0,314 | 0,333 | 1 |
| Dut      | 0,792418 | 0,022505 | 0,174 | 0,186 | 1 |
| Gm3055   | 0,792534 | -0,00424 | 0,013 | 0,015 | 1 |
| Jpt1     | 0,792739 | 0,022749 | 0,09  | 0,097 | 1 |
| Synpo2   | 0,79294  | -0,0019  | 0,013 | 0,015 | 1 |
| Traf4    | 0,79294  | -0,0019  | 0,013 | 0,015 | 1 |
| Pafah1b3 | 0,792942 | -0,00216 | 0,013 | 0,015 | 1 |
| Tbc1d30  | 0,793049 | 0,023551 | 0,039 | 0,036 | 1 |
| Gm49179  | 0,793308 | 0,0087   | 0,026 | 0,023 | 1 |
| Hspb1    | 0,793353 | 0,001608 | 0,013 | 0,015 | 1 |
| Mcm5     | 0,793584 | 0,006202 | 0,048 | 0,044 | 1 |
| Specc1l  | 0,794061 | 0,022715 | 0,294 | 0,316 | 1 |
| Ccdc13   | 0,794115 | 0,03924  | 0,558 | 0,629 | 1 |
| Ctnn     | 0,794125 | 0,019602 | 0,418 | 0,449 | 1 |
| Coa5     | 0,794263 | 0,01289  | 0,207 | 0,217 | 1 |
| Tjp2     | 0,794366 | 0,04076  | 0,796 | 0,827 | 1 |
| Brd1     | 0,794561 | 0,021517 | 0,594 | 0,643 | 1 |
| Dqx1     | 0,794986 | -0,00381 | 0,013 | 0,015 | 1 |
| Phlda1   | 0,795169 | 0,138801 | 0,262 | 0,27  | 1 |
| Pih1d1   | 0,795338 | 0,027124 | 0,294 | 0,316 | 1 |
| Olfr1160 | 0,795798 | -8,8E-05 | 0,013 | 0,015 | 1 |
| Gm14327  | 0,795798 | -8,8E-05 | 0,013 | 0,015 | 1 |
| Gm49064  | 0,795798 | -8,8E-05 | 0,013 | 0,015 | 1 |
| Gm17227  | 0,795798 | -8,8E-05 | 0,013 | 0,015 | 1 |
| Dnd1     | 0,7958   | -0,00036 | 0,013 | 0,015 | 1 |
| Sec23a   | 0,795867 | 0,039051 | 0,215 | 0,215 | 1 |
| Zfp653   | 0,795898 | 0,037597 | 0,16  | 0,158 | 1 |
| Gm26830  | 0,796209 | 0,001446 | 0,013 | 0,015 | 1 |

|           |          |          |       |       |   |
|-----------|----------|----------|-------|-------|---|
| Timeless  | 0,796377 | 0,003934 | 0,026 | 0,023 | 1 |
| Csrnp3    | 0,796594 | 0,015986 | 0,218 | 0,23  | 1 |
| Plppr2    | 0,797269 | 0,022742 | 0,064 | 0,061 | 1 |
| Gdpd3     | 0,79731  | 0,018347 | 0,039 | 0,036 | 1 |
| Ubtd1     | 0,797326 | 0,013134 | 0,05  | 0,046 | 1 |
| Peak1     | 0,797745 | 0,061801 | 0,266 | 0,291 | 1 |
| Smyd5     | 0,797819 | 0,003767 | 0,128 | 0,135 | 1 |
| Ptbp2     | 0,79783  | 0,020801 | 0,618 | 0,675 | 1 |
| Psmc3     | 0,797867 | -0,00091 | 0,936 | 0,935 | 1 |
| Zkscan8   | 0,797923 | 0,038021 | 0,172 | 0,171 | 1 |
| Akt1      | 0,798271 | 0,046923 | 0,429 | 0,454 | 1 |
| Hivep2    | 0,798293 | 0,005188 | 0,073 | 0,078 | 1 |
| 1700109H1 | 0,798658 | 0,014856 | 0,062 | 0,059 | 1 |
| Syt14     | 0,798659 | 0,001719 | 0,013 | 0,015 | 1 |
| Gm47547   | 0,798661 | 0,001446 | 0,013 | 0,015 | 1 |
| Arl5b     | 0,79891  | 0,040056 | 0,147 | 0,158 | 1 |
| Card19    | 0,799107 | 0,02721  | 0,714 | 0,734 | 1 |
| Ddx42     | 0,799225 | 0,053131 | 0,475 | 0,511 | 1 |
| Lrrc8c    | 0,799544 | 0,046737 | 0,341 | 0,346 | 1 |
| Nhej1     | 0,799566 | 0,001395 | 0,055 | 0,059 | 1 |
| Maml2     | 0,799675 | 0,006667 | 0,057 | 0,061 | 1 |
| Gm42670   | 0,800297 | 0,004764 | 0,013 | 0,015 | 1 |
| Slx1b     | 0,800832 | 0,003522 | 0,189 | 0,198 | 1 |
| Rnd2      | 0,801152 | 0,04336  | 0,578 | 0,599 | 1 |
| Plp1      | 0,801347 | -0,01571 | 1     | 0,998 | 1 |
| 1700056E2 | 0,801522 | 0,005323 | 0,013 | 0,015 | 1 |
| Csk       | 0,801693 | 0,039901 | 0,288 | 0,293 | 1 |
| Plekhg3   | 0,801792 | 0,055202 | 0,683 | 0,751 | 1 |
| Rprd2     | 0,802634 | 0,043607 | 0,4   | 0,445 | 1 |
| Pou5f2    | 0,80267  | 0,007291 | 0,075 | 0,08  | 1 |
| Setbp1    | 0,802914 | 0,0008   | 0,15  | 0,156 | 1 |
| Numa1     | 0,802971 | 0,051571 | 0,547 | 0,584 | 1 |
| Tbc1d4    | 0,803243 | 0,011516 | 0,075 | 0,08  | 1 |
| Hnrnpab   | 0,803292 | 0,043927 | 0,767 | 0,81  | 1 |
| Pus10     | 0,803431 | 0,015937 | 0,101 | 0,097 | 1 |
| Aox1      | 0,80394  | 7,43E-06 | 0,037 | 0,034 | 1 |
| Patl1     | 0,80399  | 0,039499 | 0,182 | 0,181 | 1 |
| Pcsk7     | 0,804187 | 0,033317 | 0,217 | 0,234 | 1 |
| Eno1      | 0,804411 | 0,010972 | 0,591 | 0,605 | 1 |
| Gm16973   | 0,80454  | 0,01879  | 0,064 | 0,061 | 1 |
| Adam15    | 0,805151 | 0,026291 | 0,345 | 0,371 | 1 |
| Zfp180    | 0,805151 | 0,030656 | 0,288 | 0,308 | 1 |
| Ifit2     | 0,805278 | 0,020948 | 0,204 | 0,213 | 1 |
| Zfp236    | 0,805312 | 0,018849 | 0,231 | 0,228 | 1 |
| Dxo       | 0,805375 | 0,020896 | 0,18  | 0,177 | 1 |
| Atp2b1    | 0,80554  | 0,048497 | 0,688 | 0,743 | 1 |
| Snx13     | 0,805574 | 0,019689 | 0,363 | 0,386 | 1 |
| Gpr45     | 0,805585 | -0,00371 | 0,011 | 0,013 | 1 |
| Gm16867   | 0,805585 | -0,00371 | 0,011 | 0,013 | 1 |
| Tmem255a  | 0,805588 | -0,00424 | 0,011 | 0,013 | 1 |
| Ogfod1    | 0,805886 | 0,029699 | 0,154 | 0,152 | 1 |
| Myd88     | 0,806085 | 0,000687 | 0,072 | 0,076 | 1 |

|           |          |          |       |       |   |
|-----------|----------|----------|-------|-------|---|
| Zfp319    | 0,806514 | 0,015849 | 0,156 | 0,165 | 1 |
| Klf16     | 0,806515 | 0,007982 | 0,099 | 0,095 | 1 |
| Gm42788   | 0,80756  | 0,006202 | 0,05  | 0,046 | 1 |
| Mepce     | 0,80803  | 0,053839 | 0,358 | 0,397 | 1 |
| Eif5b     | 0,808163 | 0,048742 | 0,774 | 0,787 | 1 |
| 11100060  | 0,808238 | -0,00163 | 0,011 | 0,013 | 1 |
| Tmtc1     | 0,808238 | -0,00163 | 0,011 | 0,013 | 1 |
| Grhl1     | 0,808238 | -0,00163 | 0,011 | 0,013 | 1 |
| 6330403N  | 0,80824  | -0,0019  | 0,011 | 0,013 | 1 |
| 4930469K  | 0,80824  | -0,0019  | 0,011 | 0,013 | 1 |
| Vash1     | 0,809161 | 0,002302 | 0,033 | 0,036 | 1 |
| Arhgap39  | 0,809297 | 0,047918 | 0,415 | 0,46  | 1 |
| Phtf2     | 0,80945  | 0,022151 | 0,064 | 0,061 | 1 |
| Hist1h2ae | 0,81001  | -0,00216 | 0,011 | 0,013 | 1 |
| Gm10220   | 0,810075 | 0,017834 | 0,017 | 0,015 | 1 |
| Pank4     | 0,810752 | 0,001402 | 0,106 | 0,112 | 1 |
| Cep89     | 0,810764 | 0,004591 | 0,15  | 0,158 | 1 |
| Atmin     | 0,810856 | 0,021045 | 0,106 | 0,103 | 1 |
| Cfap126   | 0,810894 | 0,000183 | 0,011 | 0,013 | 1 |
| Ccdc142os | 0,810894 | 0,000183 | 0,011 | 0,013 | 1 |
| Sap30     | 0,810894 | 0,000183 | 0,011 | 0,013 | 1 |
| Gm6994    | 0,810894 | 0,000183 | 0,011 | 0,013 | 1 |
| Fam20b    | 0,811083 | 0,024617 | 0,169 | 0,167 | 1 |
| Prtg      | 0,811088 | 0,017742 | 0,103 | 0,11  | 1 |
| Ftsj3     | 0,811201 | 0,03706  | 0,281 | 0,306 | 1 |
| Elp3      | 0,811369 | 0,015672 | 0,306 | 0,323 | 1 |
| Fbxo46    | 0,811485 | 0,001735 | 0,156 | 0,162 | 1 |
| Gpatch3   | 0,811507 | 0,026407 | 0,066 | 0,063 | 1 |
| Aprt      | 0,81183  | 0,023985 | 0,161 | 0,171 | 1 |
| Rhobtb2   | 0,812013 | 0,021452 | 0,123 | 0,131 | 1 |
| Cadps     | 0,812103 | 0,027767 | 0,084 | 0,082 | 1 |
| Gm11110   | 0,81223  | 0,008292 | 0,051 | 0,049 | 1 |
| Syt11     | 0,812695 | 0,008842 | 1     | 0,998 | 1 |
| Prr12     | 0,812772 | 0,026859 | 0,272 | 0,272 | 1 |
| Slc16a2   | 0,812872 | 0,003903 | 0,088 | 0,093 | 1 |
| Rsl1      | 0,813355 | 0,006099 | 0,033 | 0,036 | 1 |
| Pcp4l1    | 0,813553 | 0,0038   | 0,011 | 0,013 | 1 |
| Wdr31     | 0,813553 | 0,0038   | 0,011 | 0,013 | 1 |
| Ecm2      | 0,813554 | 0,001719 | 0,011 | 0,013 | 1 |
| Myo18a    | 0,813699 | -0,01094 | 0,809 | 0,802 | 1 |
| Smg1      | 0,813864 | 0,068535 | 0,42  | 0,449 | 1 |
| Nrarp     | 0,81437  | 0,007579 | 0,035 | 0,038 | 1 |
| Auts2     | 0,814493 | 0,015941 | 0,633 | 0,658 | 1 |
| Lsm14a    | 0,814752 | 0,055713 | 0,574 | 0,641 | 1 |
| Irak1bp1  | 0,814799 | 0,005702 | 0,132 | 0,139 | 1 |
| Ghdc      | 0,814927 | 0,005558 | 0,204 | 0,213 | 1 |
| Apc2      | 0,815041 | 0,007025 | 0,141 | 0,148 | 1 |
| Tsga10    | 0,815297 | 0,031754 | 0,206 | 0,219 | 1 |
| Rab3d     | 0,81561  | 0,009897 | 0,028 | 0,025 | 1 |
| Poldip3   | 0,815621 | 0,046593 | 0,503 | 0,54  | 1 |
| Lefty1    | 0,815631 | -0,00348 | 0,094 | 0,099 | 1 |
| B4galt2   | 0,815724 | 0,007025 | 0,075 | 0,08  | 1 |

|           |          |          |       |       |   |
|-----------|----------|----------|-------|-------|---|
| Sh2b3     | 0,815938 | 0,011124 | 0,051 | 0,049 | 1 |
| Gm34552   | 0,816213 | 0,005604 | 0,011 | 0,013 | 1 |
| Prodh     | 0,816213 | 0,012785 | 0,011 | 0,013 | 1 |
| Gsk3a     | 0,816834 | 0,01816  | 0,598 | 0,665 | 1 |
| Mtmr7     | 0,817268 | -0,00326 | 0,031 | 0,034 | 1 |
| Itgb8     | 0,81729  | 0,033606 | 0,745 | 0,764 | 1 |
| Eea1      | 0,817325 | -0,00068 | 0,492 | 0,511 | 1 |
| Trdmt1    | 0,817813 | 0,012389 | 0,092 | 0,097 | 1 |
| Gm21680   | 0,817828 | 0,004064 | 0,033 | 0,036 | 1 |
| 2510017J1 | 0,818125 | 0,02294  | 0,04  | 0,038 | 1 |
| Clcn1     | 0,818149 | 0,005323 | 0,017 | 0,015 | 1 |
| Foxm1     | 0,818149 | 0,007119 | 0,017 | 0,015 | 1 |
| Zfp607b   | 0,818902 | -0,00054 | 0,123 | 0,129 | 1 |
| Zc3h18    | 0,819641 | 0,018583 | 0,418 | 0,456 | 1 |
| Qsox1     | 0,819851 | 0,062102 | 0,435 | 0,466 | 1 |
| Gm32369   | 0,820052 | -0,00553 | 0,009 | 0,011 | 1 |
| Sipa1l3   | 0,820215 | 0,027854 | 0,242 | 0,243 | 1 |
| Cst3      | 0,82023  | 0,017773 | 0,796 | 0,804 | 1 |
| Hspb2     | 0,820338 | 0,008439 | 0,072 | 0,076 | 1 |
| Wfs1      | 0,820385 | -0,00143 | 0,119 | 0,124 | 1 |
| P2ry12    | 0,820425 | -0,00406 | 0,05  | 0,053 | 1 |
| Zfp451    | 0,820532 | 0,0622   | 0,369 | 0,414 | 1 |
| Ap1g1     | 0,820697 | 0,048075 | 0,35  | 0,384 | 1 |
| Slc45a4   | 0,820764 | 0,011124 | 0,051 | 0,049 | 1 |
| Mdrl      | 0,820845 | 0,003522 | 0,017 | 0,015 | 1 |
| Rps6kb1   | 0,820907 | 0,031274 | 0,558 | 0,605 | 1 |
| Frrs1l    | 0,820994 | 0,002596 | 0,051 | 0,055 | 1 |
| Ppp2r3d   | 0,821205 | 0,038177 | 0,27  | 0,276 | 1 |
| Zfp982    | 0,821618 | 0,003246 | 0,017 | 0,015 | 1 |
| Adcy3     | 0,821865 | -0,00123 | 0,031 | 0,034 | 1 |
| Myef2     | 0,821871 | 0,033098 | 0,576 | 0,631 | 1 |
| Agps      | 0,821937 | 0,022996 | 0,512 | 0,565 | 1 |
| Intu      | 0,821949 | 0,001395 | 0,05  | 0,053 | 1 |
| Lurap1l   | 0,822397 | -0,0007  | 0,031 | 0,034 | 1 |
| Ctxn1     | 0,822397 | -0,0007  | 0,031 | 0,034 | 1 |
| Evl       | 0,822437 | 0,014572 | 0,053 | 0,051 | 1 |
| Gm12496   | 0,822482 | -0,00345 | 0,009 | 0,011 | 1 |
| Spocd1    | 0,822482 | -0,00345 | 0,009 | 0,011 | 1 |
| Pde3b     | 0,822482 | -0,00345 | 0,009 | 0,011 | 1 |
| Slc18b1   | 0,822482 | -0,00345 | 0,009 | 0,011 | 1 |
| Klf12     | 0,822482 | -0,00345 | 0,009 | 0,011 | 1 |
| Dhrs3     | 0,822482 | -0,00553 | 0,009 | 0,011 | 1 |
| Tnfrsf10b | 0,822482 | -0,00553 | 0,009 | 0,011 | 1 |
| C8g       | 0,822482 | -0,01175 | 0,009 | 0,011 | 1 |
| Srpk3     | 0,822618 | 0,046112 | 0,262 | 0,283 | 1 |
| Itpripl2  | 0,822986 | 0,02304  | 0,051 | 0,049 | 1 |
| Epb41l5   | 0,823303 | 0,012542 | 0,04  | 0,038 | 1 |
| Hipk3     | 0,823462 | 0,048836 | 0,354 | 0,388 | 1 |
| Galnt16   | 0,823889 | 0,029044 | 0,251 | 0,268 | 1 |
| Eif2ak4   | 0,824127 | 0,021925 | 0,127 | 0,135 | 1 |
| Myh9      | 0,824239 | 0,040992 | 0,305 | 0,31  | 1 |
| Gm16286   | 0,824387 | 0,010136 | 0,67  | 0,7   | 1 |

|           |          |          |       |       |   |
|-----------|----------|----------|-------|-------|---|
| Ddx5      | 0,824764 | 0,047539 | 1     | 1     | 1 |
| Trim17    | 0,824913 | -0,00136 | 0,009 | 0,011 | 1 |
| Gm49271   | 0,824913 | -0,00136 | 0,009 | 0,011 | 1 |
| Syngap1   | 0,824913 | -0,00136 | 0,009 | 0,011 | 1 |
| Uchl4     | 0,824915 | -0,00163 | 0,009 | 0,011 | 1 |
| Rora      | 0,825066 | 0,062033 | 0,292 | 0,3   | 1 |
| Gm45509   | 0,825484 | 0,00523  | 0,051 | 0,055 | 1 |
| Cul3      | 0,825981 | 0,019486 | 0,683 | 0,741 | 1 |
| Zfyve26   | 0,825997 | 0,014163 | 0,345 | 0,365 | 1 |
| 2700049A  | 0,826146 | 0,004393 | 0,106 | 0,112 | 1 |
| Hpcal1    | 0,826364 | 0,021619 | 0,217 | 0,215 | 1 |
| Gm13620   | 0,826375 | -0,00397 | 0,009 | 0,011 | 1 |
| Psme1     | 0,826379 | 0,041267 | 0,156 | 0,167 | 1 |
| Prkaa2    | 0,826608 | 0,011055 | 0,105 | 0,101 | 1 |
| Stxbp5l   | 0,826743 | 0,002302 | 0,031 | 0,034 | 1 |
| Gm10010   | 0,827016 | -0,00036 | 0,017 | 0,015 | 1 |
| Polk      | 0,82702  | 0,017575 | 0,167 | 0,173 | 1 |
| Myo9b     | 0,827259 | 0,036166 | 0,306 | 0,323 | 1 |
| B9d1os    | 0,827348 | 0,000456 | 0,009 | 0,011 | 1 |
| Gm10353   | 0,827348 | 0,000456 | 0,009 | 0,011 | 1 |
| Slc12a4   | 0,828075 | 0,010834 | 0,112 | 0,118 | 1 |
| Mmp2      | 0,828207 | 0,016313 | 0,035 | 0,038 | 1 |
| Wbp1l     | 0,828285 | 0,021909 | 0,413 | 0,445 | 1 |
| Ska3      | 0,828323 | 0,009201 | 0,009 | 0,011 | 1 |
| Pomt1     | 0,828517 | 0,020496 | 0,145 | 0,154 | 1 |
| Phldb2    | 0,828643 | 0,0015   | 0,031 | 0,034 | 1 |
| Zfp811    | 0,829186 | 0,000272 | 0,031 | 0,034 | 1 |
| Lrch3     | 0,829444 | 0,061599 | 0,371 | 0,392 | 1 |
| Cplx1     | 0,829784 | 0,002269 | 0,009 | 0,011 | 1 |
| Pcnx2     | 0,829784 | 0,002269 | 0,009 | 0,011 | 1 |
| Tomm6os   | 0,829784 | 0,004079 | 0,009 | 0,011 | 1 |
| Tmem41a   | 0,829794 | 0,014289 | 0,066 | 0,063 | 1 |
| Arrdc4    | 0,829996 | 0,002302 | 0,031 | 0,034 | 1 |
| Nacad     | 0,83042  | 0,037324 | 0,55  | 0,618 | 1 |
| Sbk1      | 0,830422 | 0,020896 | 0,165 | 0,162 | 1 |
| Mfsd9     | 0,831077 | 0,002842 | 0,031 | 0,034 | 1 |
| Zfp202    | 0,831259 | 0,009614 | 0,033 | 0,036 | 1 |
| Sphk2     | 0,831503 | 0,023325 | 0,297 | 0,314 | 1 |
| 9330160F1 | 0,831526 | 0,014572 | 0,033 | 0,036 | 1 |
| Elf4      | 0,831568 | -0,003   | 0,029 | 0,032 | 1 |
| Zfp385a   | 0,832221 | 0,004079 | 0,009 | 0,011 | 1 |
| Tlr3      | 0,832621 | -0,00017 | 0,028 | 0,025 | 1 |
| AI504432  | 0,832765 | 0,012699 | 0,268 | 0,266 | 1 |
| Pcdhga6   | 0,832859 | 0,003124 | 0,05  | 0,053 | 1 |
| Ambra1    | 0,833271 | 0,026023 | 0,196 | 0,194 | 1 |
| Gmps      | 0,833297 | 0,056257 | 0,382 | 0,426 | 1 |
| Camsap1   | 0,833694 | 0,056686 | 0,272 | 0,285 | 1 |
| Fbn2      | 0,834648 | -0,00326 | 0,029 | 0,032 | 1 |
| Sdhc      | 0,834973 | 0,041739 | 0,644 | 0,688 | 1 |
| Cdk11b    | 0,835147 | 0,027476 | 0,611 | 0,635 | 1 |
| Gm26764   | 0,835424 | 0,00461  | 0,031 | 0,034 | 1 |
| Mib2      | 0,835824 | 0,027599 | 0,261 | 0,266 | 1 |

|           |          |          |       |       |   |
|-----------|----------|----------|-------|-------|---|
| Kif5c     | 0,835859 | 0,05423  | 0,31  | 0,319 | 1 |
| Acbd5     | 0,836593 | 0,004925 | 0,725 | 0,751 | 1 |
| Etv3      | 0,836938 | 0,031998 | 0,191 | 0,19  | 1 |
| Arfgef3   | 0,837769 | 0,036701 | 0,253 | 0,268 | 1 |
| Tpt1      | 0,837773 | 0,058046 | 1     | 1     | 1 |
| Tcea1     | 0,837986 | 0,015431 | 0,824 | 0,816 | 1 |
| Trim8     | 0,838751 | 0,050775 | 0,453 | 0,477 | 1 |
| Ammecr1l  | 0,839585 | 0,019533 | 0,261 | 0,274 | 1 |
| Adck5     | 0,840805 | 0,001339 | 0,029 | 0,032 | 1 |
| 4930513N  | 0,840988 | 0,006453 | 0,007 | 0,006 | 1 |
| Irf8      | 0,840988 | 0,017264 | 0,007 | 0,006 | 1 |
| Taf9      | 0,840988 | 0,01007  | 0,007 | 0,006 | 1 |
| Fbrs      | 0,841128 | 0,034349 | 0,316 | 0,321 | 1 |
| Snx17     | 0,841856 | 0,005728 | 0,688 | 0,738 | 1 |
| Tubgcp6   | 0,842026 | 0,023905 | 0,088 | 0,086 | 1 |
| Tpcn2     | 0,842308 | 0,008983 | 0,029 | 0,027 | 1 |
| Usp32     | 0,842318 | 0,054418 | 0,38  | 0,422 | 1 |
| Ppig      | 0,842352 | 0,032751 | 0,695 | 0,734 | 1 |
| Spire1    | 0,842434 | 0,063088 | 0,439 | 0,479 | 1 |
| B230398E  | 0,842737 | 0,00464  | 0,007 | 0,006 | 1 |
| Syce2     | 0,842737 | 0,00464  | 0,007 | 0,006 | 1 |
| Ccr5      | 0,842737 | 0,00464  | 0,007 | 0,006 | 1 |
| Hist1h4a  | 0,842737 | 0,00464  | 0,007 | 0,006 | 1 |
| Tmc1      | 0,842737 | 0,00464  | 0,007 | 0,006 | 1 |
| Ebf4      | 0,842737 | 0,006453 | 0,007 | 0,006 | 1 |
| Slc16a4   | 0,842737 | 0,006453 | 0,007 | 0,006 | 1 |
| Kif15     | 0,842737 | 0,006453 | 0,007 | 0,006 | 1 |
| Pnck      | 0,843406 | -0,00109 | 0,007 | 0,008 | 1 |
| Gm20707   | 0,843406 | -0,00109 | 0,007 | 0,008 | 1 |
| Fam149a   | 0,843406 | -0,00109 | 0,007 | 0,008 | 1 |
| Esyt3     | 0,843406 | -0,00109 | 0,007 | 0,008 | 1 |
| AC124739. | 0,843406 | -0,00109 | 0,007 | 0,008 | 1 |
| Srp54b    | 0,843406 | -0,00109 | 0,007 | 0,008 | 1 |
| Tdrd9     | 0,843406 | -0,00109 | 0,007 | 0,008 | 1 |
| Srl       | 0,843406 | -0,00109 | 0,007 | 0,008 | 1 |
| Tead3     | 0,843406 | -0,00109 | 0,007 | 0,008 | 1 |
| Ppp1r18   | 0,843406 | -0,00109 | 0,007 | 0,008 | 1 |
| Kctd16    | 0,843406 | -0,00109 | 0,007 | 0,008 | 1 |
| Tal2      | 0,843407 | -0,00136 | 0,007 | 0,008 | 1 |
| Lrrc8d    | 0,843643 | 0,060689 | 0,539 | 0,589 | 1 |
| Rasgrf2   | 0,843953 | 0,000456 | 0,007 | 0,008 | 1 |
| Strn3     | 0,843976 | 0,029433 | 0,646 | 0,677 | 1 |
| Ulk2      | 0,843977 | 0,021439 | 0,545 | 0,574 | 1 |
| Gm6525    | 0,844488 | 0,008263 | 0,007 | 0,006 | 1 |
| Exd1      | 0,844488 | 0,006453 | 0,007 | 0,006 | 1 |
| Tec       | 0,844488 | 0,006453 | 0,007 | 0,006 | 1 |
| Cntnap2   | 0,844488 | 0,00464  | 0,007 | 0,006 | 1 |
| Thns12    | 0,844488 | 0,00464  | 0,007 | 0,006 | 1 |
| Rcn1      | 0,844488 | 0,002823 | 0,007 | 0,006 | 1 |
| Ercc6l    | 0,844488 | 0,002823 | 0,007 | 0,006 | 1 |
| 1810062G  | 0,844488 | 0,002823 | 0,007 | 0,006 | 1 |
| Sync      | 0,844488 | 0,002823 | 0,007 | 0,006 | 1 |



|           |          |          |       |       |   |
|-----------|----------|----------|-------|-------|---|
| Gm15614   | 0,844488 | 0,002823 | 0,007 | 0,006 | 1 |
| Fxyd5     | 0,844488 | 0,002823 | 0,007 | 0,006 | 1 |
| Clec3b    | 0,844488 | 0,002823 | 0,007 | 0,006 | 1 |
| Dsccl1    | 0,844488 | 0,002823 | 0,007 | 0,006 | 1 |
| Prss12    | 0,844489 | 0,0038   | 0,007 | 0,006 | 1 |
| Nars      | 0,844553 | 0,032645 | 0,69  | 0,751 | 1 |
| Ncoa6     | 0,844646 | 0,065375 | 0,358 | 0,38  | 1 |
| Cdh13     | 0,845072 | 0,012491 | 0,007 | 0,006 | 1 |
| Mef2d     | 0,845113 | 0,009002 | 0,261 | 0,272 | 1 |
| Pfklp     | 0,8453   | 0,009897 | 0,029 | 0,032 | 1 |
| Dclre1b   | 0,845379 | -0,00119 | 0,114 | 0,118 | 1 |
| Gm28322   | 0,845504 | 0,269968 | 0,152 | 0,156 | 1 |
| Usp3      | 0,845531 | 0,016328 | 0,178 | 0,175 | 1 |
| Atg2b     | 0,845545 | 0,008427 | 0,183 | 0,19  | 1 |
| Phf12     | 0,845556 | 0,052039 | 0,367 | 0,38  | 1 |
| Kcnd1     | 0,845592 | 0,007975 | 0,007 | 0,008 | 1 |
| Gm2447    | 0,845592 | 0,004359 | 0,007 | 0,008 | 1 |
| Akap5     | 0,845592 | 0,004359 | 0,007 | 0,008 | 1 |
| Rgs9      | 0,845592 | 0,002546 | 0,007 | 0,008 | 1 |
| Slc9a3    | 0,845592 | 0,002546 | 0,007 | 0,008 | 1 |
| Gm16386   | 0,845592 | 0,002546 | 0,007 | 0,008 | 1 |
| Efhc1     | 0,845592 | 0,000729 | 0,007 | 0,008 | 1 |
| Mroh3     | 0,845592 | 0,000729 | 0,007 | 0,008 | 1 |
| Echdc3    | 0,845592 | 0,000729 | 0,007 | 0,008 | 1 |
| Olfr1307  | 0,845592 | 0,000729 | 0,007 | 0,008 | 1 |
| Gm16754   | 0,845592 | 0,000729 | 0,007 | 0,008 | 1 |
| Sarm1     | 0,845592 | 0,000729 | 0,007 | 0,008 | 1 |
| Gm40557   | 0,845592 | 0,000729 | 0,007 | 0,008 | 1 |
| Vmn2r95   | 0,845592 | 0,000729 | 0,007 | 0,008 | 1 |
| Itga4     | 0,845959 | 0,016232 | 0,073 | 0,078 | 1 |
| Slc11a1   | 0,846239 | 0,001003 | 0,007 | 0,006 | 1 |
| Chrnbl2   | 0,846239 | 0,001003 | 0,007 | 0,006 | 1 |
| Gm29561   | 0,846239 | 0,001003 | 0,007 | 0,006 | 1 |
| 1700057H  | 0,846239 | 0,001003 | 0,007 | 0,006 | 1 |
| Tekt2     | 0,846239 | 0,001003 | 0,007 | 0,006 | 1 |
| Scml4     | 0,846239 | 0,001003 | 0,007 | 0,006 | 1 |
| A330041J2 | 0,846239 | 0,001003 | 0,007 | 0,006 | 1 |
| Tmc8      | 0,846239 | 0,001003 | 0,007 | 0,006 | 1 |
| Dnah17    | 0,846239 | 0,001003 | 0,007 | 0,006 | 1 |
| Gm47123   | 0,846239 | 0,001003 | 0,007 | 0,006 | 1 |
| Gm26803   | 0,846239 | 0,001003 | 0,007 | 0,006 | 1 |
| Fbxl7     | 0,846239 | 0,001003 | 0,007 | 0,006 | 1 |
| Emx2os    | 0,846239 | 0,001003 | 0,007 | 0,006 | 1 |
| Tm6sf2    | 0,84624  | 0,002546 | 0,007 | 0,006 | 1 |
| Mknk1     | 0,846326 | 0,009167 | 0,105 | 0,11  | 1 |
| Ttc30a1   | 0,846659 | 0,006932 | 0,029 | 0,027 | 1 |
| Gnb4      | 0,84676  | 0,051712 | 0,508 | 0,555 | 1 |
| Arhgap15  | 0,846777 | 0,024331 | 0,088 | 0,093 | 1 |
| Ftl1-ps1  | 0,846987 | 0,019382 | 0,161 | 0,171 | 1 |
| Tubb5     | 0,847065 | 0,00228  | 0,703 | 0,717 | 1 |
| Foxred2   | 0,847139 | -0,00104 | 0,046 | 0,049 | 1 |
| Washc4    | 0,847233 | 0,017832 | 0,624 | 0,667 | 1 |

|           |          |          |       |       |   |
|-----------|----------|----------|-------|-------|---|
| Gm4793    | 0,847236 | -0,00222 | 0,028 | 0,03  | 1 |
| Iffo2     | 0,84728  | 0,020181 | 0,07  | 0,068 | 1 |
| Hmg20b    | 0,847332 | 0,083839 | 0,389 | 0,42  | 1 |
| Eif5      | 0,847576 | 0,021777 | 0,952 | 0,96  | 1 |
| A930004D  | 0,847582 | 0,008627 | 0,018 | 0,017 | 1 |
| 4930532G  | 0,847779 | 0,002546 | 0,007 | 0,008 | 1 |
| Gm47237   | 0,847779 | 0,002546 | 0,007 | 0,008 | 1 |
| Adamts5   | 0,847779 | 0,002546 | 0,007 | 0,008 | 1 |
| Gm10036   | 0,847779 | 0,002546 | 0,007 | 0,008 | 1 |
| Iapp      | 0,847779 | 0,004359 | 0,007 | 0,008 | 1 |
| Csnk1g2   | 0,847819 | 0,041847 | 0,394 | 0,432 | 1 |
| Usf2      | 0,847988 | 0,039938 | 0,739 | 0,787 | 1 |
| Mllt3     | 0,848514 | 0,026812 | 0,183 | 0,194 | 1 |
| Kif17     | 0,848576 | -0,00109 | 0,007 | 0,006 | 1 |
| Far2      | 0,848576 | -0,00109 | 0,007 | 0,006 | 1 |
| Dok4      | 0,848576 | -0,00109 | 0,007 | 0,006 | 1 |
| A730098A  | 0,848576 | -0,00109 | 0,007 | 0,006 | 1 |
| Kcnj12    | 0,848576 | -0,00109 | 0,007 | 0,006 | 1 |
| Sfrp4     | 0,848576 | -0,00109 | 0,007 | 0,006 | 1 |
| Gm15966   | 0,848576 | -0,00109 | 0,007 | 0,006 | 1 |
| Pcdhb8    | 0,848576 | -0,00109 | 0,007 | 0,006 | 1 |
| Snrnp48   | 0,849154 | 0,046786 | 0,672 | 0,736 | 1 |
| Cacna2d3  | 0,849281 | 0,008292 | 0,05  | 0,053 | 1 |
| Emc10     | 0,849586 | 0,017349 | 0,994 | 0,992 | 1 |
| AV099323  | 0,849846 | 0,003659 | 0,029 | 0,027 | 1 |
| Zfp516    | 0,849858 | 0,011367 | 0,029 | 0,027 | 1 |
| Rad51ap1  | 0,849967 | 0,01517  | 0,007 | 0,008 | 1 |
| Kctd10    | 0,850229 | 0,012658 | 0,095 | 0,093 | 1 |
| Asic3     | 0,850513 | 0,006836 | 0,018 | 0,017 | 1 |
| Agt       | 0,850513 | 0,010414 | 0,018 | 0,017 | 1 |
| Gm28151   | 0,850513 | 0,008627 | 0,018 | 0,017 | 1 |
| Gm13054   | 0,850513 | 0,008627 | 0,018 | 0,017 | 1 |
| Cfp       | 0,850721 | 0,003386 | 0,029 | 0,027 | 1 |
| Sipa1     | 0,850929 | -0,00896 | 0,061 | 0,063 | 1 |
| Sf3a2     | 0,850982 | 0,042032 | 0,365 | 0,395 | 1 |
| Flywch1   | 0,851332 | 0,028861 | 0,58  | 0,612 | 1 |
| Nr1d2     | 0,851514 | 0,05324  | 0,242 | 0,247 | 1 |
| Magi1     | 0,851572 | 0,065556 | 0,694 | 0,73  | 1 |
| Hspb8     | 0,851598 | 0,00461  | 0,029 | 0,027 | 1 |
| C2cd3     | 0,851835 | 0,041571 | 0,18  | 0,181 | 1 |
| Fbxo30    | 0,851879 | 0,031328 | 0,165 | 0,165 | 1 |
| Xpr1      | 0,85224  | 0,047148 | 0,215 | 0,23  | 1 |
| Vsig10    | 0,852751 | 0,007025 | 0,042 | 0,04  | 1 |
| Slain2    | 0,852771 | 0,062575 | 0,323 | 0,361 | 1 |
| Gm29107   | 0,853445 | 0,008627 | 0,018 | 0,017 | 1 |
| S100a4    | 0,853445 | 0,017532 | 0,018 | 0,017 | 1 |
| Lmbr1l    | 0,853659 | 0,018456 | 0,086 | 0,084 | 1 |
| Arih1     | 0,85377  | 0,023883 | 0,519 | 0,561 | 1 |
| Skiv2l    | 0,854096 | 0,003811 | 0,343 | 0,359 | 1 |
| Hist2h2be | 0,854181 | 0,004764 | 0,018 | 0,017 | 1 |
| Fem1c     | 0,854364 | 0,019849 | 0,374 | 0,395 | 1 |
| Limd1     | 0,854626 | 0,069489 | 0,424 | 0,454 | 1 |

|           |          |          |       |       |   |
|-----------|----------|----------|-------|-------|---|
| Mrpl53    | 0,85513  | -0,00579 | 0,026 | 0,027 | 1 |
| Erbp3     | 0,855174 | 0,034661 | 0,609 | 0,648 | 1 |
| Tctn1     | 0,855217 | 0,002619 | 0,079 | 0,082 | 1 |
| Cdc20     | 0,855374 | 0,002842 | 0,029 | 0,027 | 1 |
| Zbtb7a    | 0,855391 | 0,031116 | 0,817 | 0,827 | 1 |
| Clec16a   | 0,855638 | 0,017668 | 0,229 | 0,228 | 1 |
| Mfsd4b4   | 0,855662 | 0,003113 | 0,028 | 0,03  | 1 |
| Gm39459   | 0,855665 | 0,002842 | 0,028 | 0,03  | 1 |
| Pcdhb15   | 0,856383 | 0,011616 | 0,018 | 0,017 | 1 |
| Ing5      | 0,856781 | 0,035595 | 0,193 | 0,205 | 1 |
| Rrbp1     | 0,857159 | 0,011958 | 0,958 | 0,947 | 1 |
| Tmx1      | 0,857422 | 0,03494  | 0,404 | 0,435 | 1 |
| Urb1      | 0,857744 | 0,008172 | 0,083 | 0,086 | 1 |
| Serpinb6a | 0,858204 | 0,032055 | 0,818 | 0,819 | 1 |
| Btbd7     | 0,858397 | 0,062658 | 0,4   | 0,437 | 1 |
| Actr1b    | 0,858405 | 0,044551 | 0,382 | 0,42  | 1 |
| Igsf3     | 0,858887 | 0,031047 | 0,152 | 0,152 | 1 |
| Acss1     | 0,859316 | 0,001446 | 0,018 | 0,017 | 1 |
| Arid2     | 0,859688 | 0,036176 | 0,347 | 0,376 | 1 |
| Gm16536   | 0,859869 | 0,002529 | 0,121 | 0,118 | 1 |
| St7       | 0,861488 | -0,00078 | 0,127 | 0,131 | 1 |
| Tgds      | 0,861782 | 0,005447 | 0,083 | 0,086 | 1 |
| Mindy1    | 0,861789 | 0,032219 | 0,618 | 0,65  | 1 |
| Cnot4     | 0,861799 | 0,043517 | 0,499 | 0,538 | 1 |
| Mtcl1     | 0,862116 | 0,014829 | 0,15  | 0,156 | 1 |
| 1700094M  | 0,862558 | -0,00291 | 0,006 | 0,006 | 1 |
| Cited4    | 0,862558 | -0,00291 | 0,006 | 0,006 | 1 |
| Gpx3      | 0,862558 | -0,00291 | 0,006 | 0,006 | 1 |
| Gm14964   | 0,862558 | -0,00291 | 0,006 | 0,006 | 1 |
| Reep2     | 0,862558 | -0,005   | 0,006 | 0,006 | 1 |
| Cdh8      | 0,862986 | 0,027077 | 0,183 | 0,181 | 1 |
| Ddx31     | 0,863341 | 0,004461 | 0,046 | 0,049 | 1 |
| Gemin5    | 0,863401 | 0,002529 | 0,116 | 0,12  | 1 |
| Ccdc112   | 0,863412 | 0,020891 | 0,18  | 0,19  | 1 |
| Gm9484    | 0,863566 | 0,003386 | 0,026 | 0,027 | 1 |
| Actb      | 0,863591 | 0,006422 | 1     | 0,998 | 1 |
| Tmtc2     | 0,863688 | 0,083807 | 0,435 | 0,479 | 1 |
| Eda2r     | 0,863786 | 0,00891  | 0,05  | 0,053 | 1 |
| Bend7     | 0,863824 | -0,00318 | 0,006 | 0,006 | 1 |
| Rnf128    | 0,863824 | -0,00553 | 0,006 | 0,006 | 1 |
| Mdc1      | 0,864185 | 0,033546 | 0,244 | 0,247 | 1 |
| Acot2     | 0,864327 | 0,047694 | 0,426 | 0,47  | 1 |
| Tmem236   | 0,864457 | -0,00082 | 0,006 | 0,006 | 1 |
| Nek6      | 0,864457 | -0,00082 | 0,006 | 0,006 | 1 |
| Gm48908   | 0,864457 | -0,00082 | 0,006 | 0,006 | 1 |
| Mnd1      | 0,864457 | -0,00082 | 0,006 | 0,006 | 1 |
| Dcst1     | 0,864457 | -0,00082 | 0,006 | 0,006 | 1 |
| Gm4349    | 0,864457 | -0,00082 | 0,006 | 0,006 | 1 |
| Gm12827   | 0,864457 | -0,00082 | 0,006 | 0,006 | 1 |
| Cfap69    | 0,864457 | -0,00082 | 0,006 | 0,006 | 1 |
| Gm42556   | 0,864457 | -0,00082 | 0,006 | 0,006 | 1 |
| Ica1      | 0,864457 | -0,00082 | 0,006 | 0,006 | 1 |

|           |          |          |       |       |   |
|-----------|----------|----------|-------|-------|---|
| Gm26807   | 0,864457 | -0,00082 | 0,006 | 0,006 | 1 |
| Psg16     | 0,864457 | -0,00082 | 0,006 | 0,006 | 1 |
| Drd4      | 0,864457 | -0,00082 | 0,006 | 0,006 | 1 |
| 49324431I | 0,864457 | -0,00082 | 0,006 | 0,006 | 1 |
| 1700030J2 | 0,864457 | -0,00082 | 0,006 | 0,006 | 1 |
| Gm39302   | 0,864457 | -0,00082 | 0,006 | 0,006 | 1 |
| 5830418P: | 0,864457 | -0,00082 | 0,006 | 0,006 | 1 |
| Gm11992   | 0,864457 | -0,00082 | 0,006 | 0,006 | 1 |
| A730081D: | 0,864457 | -0,00082 | 0,006 | 0,006 | 1 |
| Gm48250   | 0,864457 | -0,00082 | 0,006 | 0,006 | 1 |
| Cdhr2     | 0,864457 | -0,00082 | 0,006 | 0,006 | 1 |
| Zfp457    | 0,864457 | -0,00082 | 0,006 | 0,006 | 1 |
| Gm47849   | 0,864457 | -0,00082 | 0,006 | 0,006 | 1 |
| Gm28989   | 0,864457 | -0,00082 | 0,006 | 0,006 | 1 |
| Gm40437   | 0,864457 | -0,00082 | 0,006 | 0,006 | 1 |
| 4930408O: | 0,864457 | -0,00082 | 0,006 | 0,006 | 1 |
| AC113595. | 0,864457 | -0,00082 | 0,006 | 0,006 | 1 |
| Gm21833   | 0,864457 | -0,00082 | 0,006 | 0,006 | 1 |
| 1700022N: | 0,864457 | -0,00082 | 0,006 | 0,006 | 1 |
| Csf1r     | 0,864457 | -0,00082 | 0,006 | 0,006 | 1 |
| Pygo1     | 0,864458 | -0,00109 | 0,006 | 0,006 | 1 |
| Nab1      | 0,86474  | 0,058491 | 0,382 | 0,418 | 1 |
| Dck       | 0,86478  | -0,003   | 0,026 | 0,027 | 1 |
| Fry       | 0,864867 | 0,00398  | 0,18  | 0,186 | 1 |
| Drosha    | 0,865051 | 0,023173 | 0,288 | 0,289 | 1 |
| Clstn3    | 0,865091 | 0,000729 | 0,006 | 0,006 | 1 |
| Pnpla6    | 0,865302 | 0,023098 | 0,283 | 0,297 | 1 |
| AC116487. | 0,865704 | 0,002717 | 0,044 | 0,046 | 1 |
| Taf5      | 0,866198 | 0,011244 | 0,158 | 0,165 | 1 |
| Nxf2      | 0,866357 | 0,00464  | 0,006 | 0,006 | 1 |
| 4930593A: | 0,866357 | 0,002823 | 0,006 | 0,006 | 1 |
| Gm10399   | 0,866357 | 0,002823 | 0,006 | 0,006 | 1 |
| Slc18a2   | 0,866357 | 0,002823 | 0,006 | 0,006 | 1 |
| 4930537H: | 0,866357 | 0,001003 | 0,006 | 0,006 | 1 |
| Il12rb2   | 0,866357 | 0,001003 | 0,006 | 0,006 | 1 |
| Ptpn5     | 0,866357 | 0,001003 | 0,006 | 0,006 | 1 |
| Nr2f2     | 0,866357 | 0,001003 | 0,006 | 0,006 | 1 |
| Ttll13    | 0,866357 | 0,001003 | 0,006 | 0,006 | 1 |
| Adam12    | 0,866357 | 0,001003 | 0,006 | 0,006 | 1 |
| Gm33148   | 0,866357 | 0,001003 | 0,006 | 0,006 | 1 |
| Kdm4d     | 0,866357 | 0,001003 | 0,006 | 0,006 | 1 |
| Pih1d2    | 0,866357 | 0,001003 | 0,006 | 0,006 | 1 |
| Gm11940   | 0,866357 | 0,001003 | 0,006 | 0,006 | 1 |
| Carmil1   | 0,866357 | 0,001003 | 0,006 | 0,006 | 1 |
| Gm30655   | 0,866357 | 0,001003 | 0,006 | 0,006 | 1 |
| Tex22     | 0,866357 | 0,001003 | 0,006 | 0,006 | 1 |
| Uhrf1     | 0,866357 | 0,001003 | 0,006 | 0,006 | 1 |
| Gm38910   | 0,866358 | 0,000729 | 0,006 | 0,006 | 1 |
| Car7      | 0,866358 | 0,000729 | 0,006 | 0,006 | 1 |
| Limk1     | 0,867186 | 0,022847 | 0,116 | 0,122 | 1 |
| Crocc     | 0,867602 | 0,006653 | 0,028 | 0,03  | 1 |
| Frat2     | 0,868027 | 0,014572 | 0,068 | 0,072 | 1 |

|          |          |          |       |       |   |
|----------|----------|----------|-------|-------|---|
| Eml2     | 0,868156 | 0,021992 | 0,925 | 0,937 | 1 |
| Zkscan1  | 0,868255 | 0,035402 | 0,266 | 0,283 | 1 |
| Ophn1    | 0,868258 | 0,002823 | 0,006 | 0,006 | 1 |
| Gm15910  | 0,868258 | 0,002823 | 0,006 | 0,006 | 1 |
| Fam129c  | 0,868258 | 0,002823 | 0,006 | 0,006 | 1 |
| Myh6     | 0,868258 | 0,002823 | 0,006 | 0,006 | 1 |
| Adgrf4   | 0,868258 | 0,002823 | 0,006 | 0,006 | 1 |
| Arhgef15 | 0,868258 | 0,00464  | 0,006 | 0,006 | 1 |
| Mucl2    | 0,868258 | 0,00464  | 0,006 | 0,006 | 1 |
| Tmem191c | 0,868394 | 0,020181 | 0,068 | 0,072 | 1 |
| Prr14    | 0,86919  | 0,061832 | 0,248 | 0,257 | 1 |
| Pdp1     | 0,87085  | 0,018012 | 0,127 | 0,133 | 1 |
| Zfp239   | 0,870881 | 0,074727 | 0,453 | 0,504 | 1 |
| Dnajc5   | 0,870993 | 0,035038 | 0,528 | 0,565 | 1 |
| Wdr3     | 0,871081 | 0,006223 | 0,158 | 0,162 | 1 |
| Ndufv1   | 0,871477 | 0,015566 | 0,809 | 0,812 | 1 |
| Efnb1    | 0,871867 | 0,01485  | 0,072 | 0,076 | 1 |
| Hira     | 0,87221  | 0,029275 | 0,231 | 0,234 | 1 |
| Hcfc1    | 0,87257  | 0,040457 | 0,374 | 0,395 | 1 |
| Nemp2    | 0,872992 | 0,01805  | 0,116 | 0,114 | 1 |
| Plin2    | 0,873187 | 0,008458 | 0,123 | 0,12  | 1 |
| Rbm15b   | 0,874072 | 0,052069 | 0,215 | 0,219 | 1 |
| Gng3     | 0,874659 | 0,027626 | 0,075 | 0,074 | 1 |
| Teddm2   | 0,874745 | 0,003793 | 0,026 | 0,027 | 1 |
| Heatr5b  | 0,875027 | 0,006018 | 0,191 | 0,196 | 1 |
| Inpp1    | 0,875368 | 0,005212 | 0,132 | 0,137 | 1 |
| L3mbtl3  | 0,875455 | 0,002034 | 0,031 | 0,03  | 1 |
| Ankrd44  | 0,87632  | 0,038421 | 0,294 | 0,312 | 1 |
| Herc1    | 0,877088 | 0,06921  | 0,488 | 0,534 | 1 |
| Dnajc6   | 0,877678 | 0,041419 | 0,394 | 0,426 | 1 |
| Syde1    | 0,877865 | 0,016718 | 0,114 | 0,112 | 1 |
| Fam222a  | 0,878537 | 0,033576 | 0,556 | 0,595 | 1 |
| Lonrf3   | 0,878581 | 0,010126 | 0,02  | 0,019 | 1 |
| Kat7     | 0,878603 | 0,036403 | 0,369 | 0,384 | 1 |
| Rad54l   | 0,878804 | 0,005387 | 0,044 | 0,046 | 1 |
| Traf6    | 0,878966 | 0,023179 | 0,253 | 0,268 | 1 |
| Prag1    | 0,879029 | 0,054578 | 0,446 | 0,487 | 1 |
| Hnrnpr   | 0,880054 | 0,012715 | 0,806 | 0,827 | 1 |
| Uba6     | 0,880135 | 0,038848 | 0,294 | 0,314 | 1 |
| Cttnbp2  | 0,880464 | -0,00114 | 0,677 | 0,696 | 1 |
| Zfp764   | 0,880526 | 0,012033 | 0,059 | 0,057 | 1 |
| Gm3854   | 0,880903 | 0,009953 | 0,046 | 0,044 | 1 |
| Ankrd13d | 0,881367 | 0,006475 | 0,044 | 0,046 | 1 |
| Spata1   | 0,881669 | 1,43E-05 | 0,073 | 0,076 | 1 |
| Ralgapb  | 0,882596 | 0,049761 | 0,374 | 0,401 | 1 |
| Kbtbd7   | 0,882938 | 0,023208 | 0,165 | 0,173 | 1 |
| Gm48071  | 0,88321  | 0,007212 | 0,026 | 0,027 | 1 |
| Med12l   | 0,883838 | 0,00215  | 0,02  | 0,019 | 1 |
| Zfp687   | 0,883997 | 0,028597 | 0,251 | 0,266 | 1 |
| Wdr90    | 0,884124 | 9,42E-05 | 0,024 | 0,025 | 1 |
| Ppfia3   | 0,88444  | 0,001608 | 0,024 | 0,025 | 1 |
| Arhgap20 | 0,884441 | 0,003113 | 0,024 | 0,025 | 1 |

|           |          |          |       |       |   |
|-----------|----------|----------|-------|-------|---|
| Cacnb4    | 0,884648 | 0,05628  | 0,64  | 0,679 | 1 |
| Lgals3bp  | 0,884887 | 0,004764 | 0,02  | 0,019 | 1 |
| Nfil3     | 0,885442 | 0,020371 | 0,165 | 0,171 | 1 |
| Hoxd4.1   | 0,88559  | 0,004486 | 0,02  | 0,019 | 1 |
| Gm20652   | 0,88559  | 0,004486 | 0,02  | 0,019 | 1 |
| Maml3     | 0,885916 | 0,024224 | 0,121 | 0,12  | 1 |
| Zbtb11    | 0,885943 | 0,06566  | 0,437 | 0,485 | 1 |
| Zfp248    | 0,886155 | 0,017018 | 0,103 | 0,101 | 1 |
| Ppp1r8    | 0,886364 | 0,022301 | 0,259 | 0,259 | 1 |
| Pde8b     | 0,886406 | -0,00474 | 0,004 | 0,004 | 1 |
| Gm11273   | 0,886975 | 0,002985 | 0,044 | 0,042 | 1 |
| Klhl13    | 0,887508 | -0,00852 | 0,053 | 0,051 | 1 |
| Atxn7l3   | 0,887922 | 0,035733 | 0,31  | 0,331 | 1 |
| Pcdhga9   | 0,887936 | 0,002717 | 0,042 | 0,044 | 1 |
| Ubr3      | 0,887952 | 0,025971 | 0,58  | 0,614 | 1 |
| Cfap45    | 0,887962 | -0,00265 | 0,004 | 0,004 | 1 |
| Gm2464.1  | 0,887962 | -0,00265 | 0,004 | 0,004 | 1 |
| Gm27022   | 0,887962 | -0,00265 | 0,004 | 0,004 | 1 |
| Gm42864   | 0,887962 | -0,00265 | 0,004 | 0,004 | 1 |
| Asprv1    | 0,887962 | -0,00265 | 0,004 | 0,004 | 1 |
| Gm49380   | 0,887962 | -0,00265 | 0,004 | 0,004 | 1 |
| Crtap     | 0,887962 | -0,00265 | 0,004 | 0,004 | 1 |
| Muc4      | 0,887962 | -0,00265 | 0,004 | 0,004 | 1 |
| Gm35439   | 0,888043 | 0,00297  | 0,02  | 0,019 | 1 |
| Wdpcp     | 0,888264 | -0,00092 | 0,07  | 0,068 | 1 |
| Kyat1     | 0,888461 | 0,01289  | 0,073 | 0,072 | 1 |
| Abcb6     | 0,888652 | 0,017814 | 0,105 | 0,11  | 1 |
| Gm16222   | 0,888741 | -0,005   | 0,004 | 0,004 | 1 |
| Bcorl1    | 0,88888  | 0,050868 | 0,347 | 0,365 | 1 |
| Amer1     | 0,88913  | 0,03485  | 0,112 | 0,112 | 1 |
| Gm37988   | 0,889519 | -0,00055 | 0,004 | 0,004 | 1 |
| Gm27184   | 0,889519 | -0,00055 | 0,004 | 0,004 | 1 |
| lkbke     | 0,889519 | -0,00055 | 0,004 | 0,004 | 1 |
| Gm16701   | 0,889519 | -0,00055 | 0,004 | 0,004 | 1 |
| Gm31728   | 0,889519 | -0,00055 | 0,004 | 0,004 | 1 |
| Gm14486   | 0,889519 | -0,00055 | 0,004 | 0,004 | 1 |
| Klhl41    | 0,889519 | -0,00055 | 0,004 | 0,004 | 1 |
| Zfp385b   | 0,889519 | -0,00055 | 0,004 | 0,004 | 1 |
| Bbox1     | 0,889519 | -0,00055 | 0,004 | 0,004 | 1 |
| Gm13963   | 0,889519 | -0,00055 | 0,004 | 0,004 | 1 |
| Gm17555   | 0,889519 | -0,00055 | 0,004 | 0,004 | 1 |
| Kif16bos  | 0,889519 | -0,00055 | 0,004 | 0,004 | 1 |
| Gm14286   | 0,889519 | -0,00055 | 0,004 | 0,004 | 1 |
| Gm14597   | 0,889519 | -0,00055 | 0,004 | 0,004 | 1 |
| Bbs12     | 0,889519 | -0,00055 | 0,004 | 0,004 | 1 |
| Gm37933   | 0,889519 | -0,00055 | 0,004 | 0,004 | 1 |
| Triqk     | 0,889519 | -0,00055 | 0,004 | 0,004 | 1 |
| 170002211 | 0,889519 | -0,00055 | 0,004 | 0,004 | 1 |
| Gm12932   | 0,889519 | -0,00055 | 0,004 | 0,004 | 1 |
| Plch2     | 0,889519 | -0,00055 | 0,004 | 0,004 | 1 |
| 4632411P  | 0,889519 | -0,00055 | 0,004 | 0,004 | 1 |
| Gm29609   | 0,889519 | -0,00055 | 0,004 | 0,004 | 1 |

|           |          |          |       |       |   |
|-----------|----------|----------|-------|-------|---|
| Gm49027   | 0,889519 | -0,00055 | 0,004 | 0,004 | 1 |
| Rflna     | 0,889519 | -0,00055 | 0,004 | 0,004 | 1 |
| Gm20594   | 0,889519 | -0,00055 | 0,004 | 0,004 | 1 |
| Gm44287   | 0,889519 | -0,00055 | 0,004 | 0,004 | 1 |
| 4930471M  | 0,889519 | -0,00055 | 0,004 | 0,004 | 1 |
| Vmn1r58   | 0,889519 | -0,00055 | 0,004 | 0,004 | 1 |
| Mia       | 0,889519 | -0,00055 | 0,004 | 0,004 | 1 |
| Lrfn3     | 0,889519 | -0,00055 | 0,004 | 0,004 | 1 |
| Olfr624   | 0,889519 | -0,00055 | 0,004 | 0,004 | 1 |
| Itgal     | 0,889519 | -0,00055 | 0,004 | 0,004 | 1 |
| Ifitm10   | 0,889519 | -0,00055 | 0,004 | 0,004 | 1 |
| 4933406P  | 0,889519 | -0,00055 | 0,004 | 0,004 | 1 |
| F420014N  | 0,889519 | -0,00055 | 0,004 | 0,004 | 1 |
| Gm26768   | 0,889519 | -0,00055 | 0,004 | 0,004 | 1 |
| Gm10131   | 0,889519 | -0,00055 | 0,004 | 0,004 | 1 |
| Gm10873   | 0,889519 | -0,00055 | 0,004 | 0,004 | 1 |
| Panx1     | 0,889519 | -0,00055 | 0,004 | 0,004 | 1 |
| Olfr77    | 0,889519 | -0,00055 | 0,004 | 0,004 | 1 |
| Olfr975   | 0,889519 | -0,00055 | 0,004 | 0,004 | 1 |
| Crtam     | 0,889519 | -0,00055 | 0,004 | 0,004 | 1 |
| Gm36799   | 0,889519 | -0,00055 | 0,004 | 0,004 | 1 |
| 1700065D  | 0,889519 | -0,00055 | 0,004 | 0,004 | 1 |
| AU023762  | 0,889519 | -0,00055 | 0,004 | 0,004 | 1 |
| Cmtm7     | 0,889519 | -0,00055 | 0,004 | 0,004 | 1 |
| Dlec1     | 0,889519 | -0,00055 | 0,004 | 0,004 | 1 |
| Gatsl3    | 0,889519 | -0,00055 | 0,004 | 0,004 | 1 |
| Gm5431    | 0,889519 | -0,00055 | 0,004 | 0,004 | 1 |
| Rhbdl3    | 0,889519 | -0,00055 | 0,004 | 0,004 | 1 |
| Gm11592   | 0,889519 | -0,00055 | 0,004 | 0,004 | 1 |
| Rara      | 0,889519 | -0,00055 | 0,004 | 0,004 | 1 |
| Fkbp10    | 0,889519 | -0,00055 | 0,004 | 0,004 | 1 |
| Gm39397   | 0,889519 | -0,00055 | 0,004 | 0,004 | 1 |
| Cygb      | 0,889519 | -0,00055 | 0,004 | 0,004 | 1 |
| Ripor2    | 0,889519 | -0,00055 | 0,004 | 0,004 | 1 |
| Omd       | 0,889519 | -0,00055 | 0,004 | 0,004 | 1 |
| Mcidas    | 0,889519 | -0,00055 | 0,004 | 0,004 | 1 |
| Gm26520   | 0,889519 | -0,00055 | 0,004 | 0,004 | 1 |
| Dab2      | 0,889519 | -0,00055 | 0,004 | 0,004 | 1 |
| 4930592A  | 0,889519 | -0,00055 | 0,004 | 0,004 | 1 |
| Eppk1     | 0,889519 | -0,00055 | 0,004 | 0,004 | 1 |
| Gm16537   | 0,889519 | -0,00055 | 0,004 | 0,004 | 1 |
| AC120150  | 0,889519 | -0,00055 | 0,004 | 0,004 | 1 |
| Gm20319   | 0,889519 | -0,00055 | 0,004 | 0,004 | 1 |
| Pnlcd1    | 0,889519 | -0,00055 | 0,004 | 0,004 | 1 |
| Has1      | 0,889519 | -0,00055 | 0,004 | 0,004 | 1 |
| H2-T24    | 0,889519 | -0,00055 | 0,004 | 0,004 | 1 |
| Gm10093   | 0,889519 | -0,00055 | 0,004 | 0,004 | 1 |
| St8sia3os | 0,889519 | -0,00055 | 0,004 | 0,004 | 1 |
| Mppe1     | 0,889519 | -0,00055 | 0,004 | 0,004 | 1 |
| Capn1     | 0,889519 | -0,00055 | 0,004 | 0,004 | 1 |
| Cyb561a3  | 0,889519 | -0,00055 | 0,004 | 0,004 | 1 |
| Gm10053   | 0,889519 | -0,00055 | 0,004 | 0,004 | 1 |

|           |          |          |       |       |   |
|-----------|----------|----------|-------|-------|---|
| Pyroxd2   | 0,889519 | -0,00055 | 0,004 | 0,004 | 1 |
| Sox5      | 0,889519 | -0,00082 | 0,004 | 0,004 | 1 |
| Gm45833   | 0,889519 | -0,00082 | 0,004 | 0,004 | 1 |
| Il3ra     | 0,889519 | -0,00082 | 0,004 | 0,004 | 1 |
| Ust       | 0,890124 | 0,007858 | 0,033 | 0,032 | 1 |
| Gm16302   | 0,890298 | 0,001003 | 0,004 | 0,004 | 1 |
| AC126055. | 0,890416 | -0,00044 | 0,024 | 0,025 | 1 |
| Dusp7     | 0,890432 | 0,009487 | 0,572 | 0,601 | 1 |
| Men1      | 0,890982 | 0,026598 | 0,257 | 0,259 | 1 |
| 2810454Hl | 0,891038 | 0,029816 | 0,136 | 0,143 | 1 |
| Gm31282   | 0,891076 | 0,008552 | 0,004 | 0,004 | 1 |
| Gm20659   | 0,891076 | 0,004922 | 0,004 | 0,004 | 1 |
| Tmem151k  | 0,891076 | 0,004922 | 0,004 | 0,004 | 1 |
| Sdcbp2    | 0,891076 | 0,003102 | 0,004 | 0,004 | 1 |
| Fam209    | 0,891076 | 0,003102 | 0,004 | 0,004 | 1 |
| Gm10767   | 0,891076 | 0,003102 | 0,004 | 0,004 | 1 |
| Gm26792   | 0,891076 | 0,003102 | 0,004 | 0,004 | 1 |
| Maf       | 0,891076 | 0,002546 | 0,004 | 0,004 | 1 |
| Zbtb46    | 0,891076 | 0,001279 | 0,004 | 0,004 | 1 |
| Pcdh18    | 0,891076 | 0,001279 | 0,004 | 0,004 | 1 |
| Fcrls     | 0,891076 | 0,001279 | 0,004 | 0,004 | 1 |
| Lor       | 0,891076 | 0,001279 | 0,004 | 0,004 | 1 |
| Frmpd1    | 0,891076 | 0,001279 | 0,004 | 0,004 | 1 |
| Sh2d5     | 0,891076 | 0,001279 | 0,004 | 0,004 | 1 |
| Samd11    | 0,891076 | 0,001279 | 0,004 | 0,004 | 1 |
| Stap1     | 0,891076 | 0,001279 | 0,004 | 0,004 | 1 |
| Vmn1r46   | 0,891076 | 0,001279 | 0,004 | 0,004 | 1 |
| 1700028J1 | 0,891076 | 0,001279 | 0,004 | 0,004 | 1 |
| Gm32849   | 0,891076 | 0,001279 | 0,004 | 0,004 | 1 |
| Gm2814    | 0,891076 | 0,001279 | 0,004 | 0,004 | 1 |
| Gm47414   | 0,891076 | 0,001279 | 0,004 | 0,004 | 1 |
| Gm26536   | 0,891076 | 0,001279 | 0,004 | 0,004 | 1 |
| Zglp1     | 0,891076 | 0,001279 | 0,004 | 0,004 | 1 |
| Ccdc151   | 0,891076 | 0,001279 | 0,004 | 0,004 | 1 |
| Kirrel3os | 0,891076 | 0,001279 | 0,004 | 0,004 | 1 |
| Pknox2    | 0,891076 | 0,001279 | 0,004 | 0,004 | 1 |
| Islr      | 0,891076 | 0,001279 | 0,004 | 0,004 | 1 |
| Gm47113   | 0,891076 | 0,001279 | 0,004 | 0,004 | 1 |
| Rrm2      | 0,891076 | 0,001279 | 0,004 | 0,004 | 1 |
| A330009N: | 0,891076 | 0,001279 | 0,004 | 0,004 | 1 |
| Popdc2    | 0,891076 | 0,001279 | 0,004 | 0,004 | 1 |
| Tcte3     | 0,891076 | 0,001279 | 0,004 | 0,004 | 1 |
| Clip4     | 0,891076 | 0,001279 | 0,004 | 0,004 | 1 |
| Zxdc      | 0,891159 | 0,02278  | 0,268 | 0,27  | 1 |
| Hhat      | 0,8912   | 0,001173 | 0,02  | 0,019 | 1 |
| Clcn3     | 0,891328 | 0,034356 | 0,967 | 0,954 | 1 |
| Slain1os  | 0,891905 | 0,000902 | 0,02  | 0,019 | 1 |
| Mogs      | 0,89192  | 0,021104 | 0,138 | 0,143 | 1 |
| Caskin1   | 0,891988 | 0,005715 | 0,024 | 0,025 | 1 |
| Als2      | 0,892345 | 0,012175 | 0,119 | 0,124 | 1 |
| Smg7      | 0,892524 | 0,043201 | 0,371 | 0,388 | 1 |
| Ckap2l    | 0,892634 | 0,003102 | 0,004 | 0,004 | 1 |



|           |          |          |       |       |   |
|-----------|----------|----------|-------|-------|---|
| Gm14409   | 0,892634 | 0,003102 | 0,004 | 0,004 | 1 |
| Calb1     | 0,892634 | 0,003102 | 0,004 | 0,004 | 1 |
| Lat       | 0,892634 | 0,003102 | 0,004 | 0,004 | 1 |
| Stpg4     | 0,892634 | 0,003102 | 0,004 | 0,004 | 1 |
| Ap4e1     | 0,893121 | 0,017901 | 0,154 | 0,16  | 1 |
| Cobll1    | 0,893389 | 0,066245 | 0,475 | 0,536 | 1 |
| Ttc25     | 0,893849 | 0,017716 | 0,048 | 0,046 | 1 |
| Gm49336   | 0,894057 | 0,045974 | 0,253 | 0,264 | 1 |
| Cela1     | 0,894386 | -0,00867 | 0,459 | 0,46  | 1 |
| Fbxo11    | 0,894441 | 0,029703 | 0,407 | 0,447 | 1 |
| Fam228a   | 0,894645 | 0,007827 | 0,072 | 0,07  | 1 |
| 6530437J2 | 0,894714 | 0,006169 | 0,009 | 0,008 | 1 |
| Fam217b   | 0,894714 | 0,009779 | 0,009 | 0,008 | 1 |
| Ankrd40   | 0,895045 | 0,036054 | 0,782 | 0,793 | 1 |
| Vps13b    | 0,895192 | 0,037272 | 0,314 | 0,331 | 1 |
| Zfp568    | 0,895262 | 0,01346  | 0,077 | 0,08  | 1 |
| Zfp326    | 0,895319 | 0,062276 | 0,55  | 0,603 | 1 |
| Dvl1      | 0,895459 | 0,03867  | 0,312 | 0,338 | 1 |
| Fam89b    | 0,895768 | 0,005715 | 0,024 | 0,025 | 1 |
| Clspn     | 0,89577  | 0,007212 | 0,024 | 0,025 | 1 |
| Zmym3     | 0,896617 | 0,033189 | 0,261 | 0,276 | 1 |
| S100a6    | 0,896631 | 0,105507 | 0,51  | 0,515 | 1 |
| Gm45767   | 0,896648 | 0,022665 | 0,134 | 0,133 | 1 |
| Gm47785   | 0,896797 | 0,004359 | 0,009 | 0,008 | 1 |
| Gm15441   | 0,896797 | 0,007975 | 0,009 | 0,008 | 1 |
| Spc25     | 0,896797 | 0,006169 | 0,009 | 0,008 | 1 |
| Apold1    | 0,896797 | 0,006169 | 0,009 | 0,008 | 1 |
| Eps8l2    | 0,896797 | 0,006169 | 0,009 | 0,008 | 1 |
| Cryaa     | 0,896798 | 0,005886 | 0,009 | 0,008 | 1 |
| Inhbb     | 0,896798 | 0,005604 | 0,009 | 0,008 | 1 |
| Hdhd3     | 0,89775  | 0,01486  | 0,048 | 0,046 | 1 |
| Zfp623    | 0,897897 | 0,00676  | 0,075 | 0,078 | 1 |
| Arhgap31  | 0,898232 | 0,049457 | 0,306 | 0,331 | 1 |
| Nexmif    | 0,89836  | 0,01487  | 0,009 | 0,008 | 1 |
| Sppl2a    | 0,898839 | 0,033093 | 0,461 | 0,496 | 1 |
| Tspan13   | 0,898881 | 0,004359 | 0,009 | 0,008 | 1 |
| Gm28043   | 0,898881 | 0,004359 | 0,009 | 0,008 | 1 |
| A430110L2 | 0,898881 | 0,002546 | 0,009 | 0,008 | 1 |
| Hmga2     | 0,898881 | 0,002546 | 0,009 | 0,008 | 1 |
| Inca1     | 0,898881 | 0,002546 | 0,009 | 0,008 | 1 |
| 4933408B: | 0,898882 | 0,004079 | 0,009 | 0,008 | 1 |
| Gm26944   | 0,89893  | -0,00296 | 0,02  | 0,019 | 1 |
| Ly96      | 0,899035 | 0,003253 | 0,039 | 0,04  | 1 |
| Mfsd1     | 0,899317 | 0,012653 | 0,211 | 0,217 | 1 |
| Efcab5    | 0,899607 | 0,012829 | 0,035 | 0,034 | 1 |
| Gpr146    | 0,9004   | 0,013018 | 0,145 | 0,143 | 1 |
| Taf5l     | 0,900413 | 0,021892 | 0,095 | 0,099 | 1 |
| Agfg2     | 0,900896 | 0,017945 | 0,206 | 0,215 | 1 |
| Rgs1      | 0,900965 | 0,000729 | 0,009 | 0,008 | 1 |
| Mmp17     | 0,900965 | 0,000729 | 0,009 | 0,008 | 1 |
| Sbk2      | 0,900965 | 0,000729 | 0,009 | 0,008 | 1 |
| Arhgef25  | 0,900965 | 0,000729 | 0,009 | 0,008 | 1 |

|           |          |          |       |       |   |
|-----------|----------|----------|-------|-------|---|
| A830082K: | 0,900965 | 0,000729 | 0,009 | 0,008 | 1 |
| Gm26533   | 0,900965 | 0,000729 | 0,009 | 0,008 | 1 |
| Olfr1423  | 0,900965 | 0,000729 | 0,009 | 0,008 | 1 |
| Asxl1     | 0,901181 | 0,033471 | 0,235 | 0,249 | 1 |
| Olfr961   | 0,901487 | 0,000456 | 0,009 | 0,008 | 1 |
| Rpp25     | 0,901487 | 0,000456 | 0,009 | 0,008 | 1 |
| Pcdhb12   | 0,901487 | 0,000456 | 0,009 | 0,008 | 1 |
| Kdsr      | 0,901793 | 0,03758  | 0,67  | 0,698 | 1 |
| Ints12    | 0,901908 | 0,01162  | 0,112 | 0,116 | 1 |
| Sesn2     | 0,902013 | 0,020316 | 0,044 | 0,046 | 1 |
| Bri3      | 0,902072 | 0,018243 | 0,894 | 0,886 | 1 |
| Set       | 0,902156 | 0,02173  | 0,961 | 0,964 | 1 |
| Cebpd     | 0,902391 | 0,082818 | 0,284 | 0,306 | 1 |
| Nme2      | 0,902998 | 0,009167 | 0,116 | 0,114 | 1 |
| 1700041G: | 0,903052 | -0,0019  | 0,009 | 0,008 | 1 |
| Tnk2      | 0,903122 | 0,034709 | 0,242 | 0,249 | 1 |
| Lzts1     | 0,903334 | 0,011039 | 0,024 | 0,025 | 1 |
| Pcna-ps2  | 0,903565 | 0,005275 | 0,04  | 0,042 | 1 |
| 5730507C: | 0,903573 | -0,00136 | 0,009 | 0,008 | 1 |
| Rbbp8     | 0,903573 | -0,00136 | 0,009 | 0,008 | 1 |
| Gm44763   | 0,904242 | 0,009953 | 0,042 | 0,044 | 1 |
| Hmga1     | 0,904307 | 0,001194 | 0,075 | 0,078 | 1 |
| Rel       | 0,90481  | 0,028977 | 0,066 | 0,07  | 1 |
| Dnm1l     | 0,907064 | 0,026089 | 0,521 | 0,551 | 1 |
| Bod1l     | 0,907855 | 0,023718 | 0,754 | 0,776 | 1 |
| Rhoa      | 0,907892 | 0,020373 | 1     | 0,998 | 1 |
| Phf13     | 0,908111 | 0,028037 | 0,143 | 0,15  | 1 |
| Safb2     | 0,908179 | 0,045131 | 0,569 | 0,622 | 1 |
| Rpl35a    | 0,908894 | 0,049063 | 0,998 | 0,994 | 1 |
| Tgif2     | 0,908901 | 0,004671 | 0,088 | 0,091 | 1 |
| Mboat2    | 0,908973 | 0,057495 | 0,512 | 0,561 | 1 |
| Fubp1     | 0,909292 | 0,060504 | 0,717 | 0,734 | 1 |
| Exoc3     | 0,909354 | 0,031081 | 0,714 | 0,745 | 1 |
| Mettl6    | 0,91021  | 0,022423 | 0,189 | 0,19  | 1 |
| Hook3     | 0,910577 | 0,033168 | 0,848 | 0,878 | 1 |
| Tmem248   | 0,910902 | 0,037103 | 0,308 | 0,319 | 1 |
| Kdm4b     | 0,911101 | 0,030058 | 0,213 | 0,224 | 1 |
| Map1a     | 0,911161 | 0,026112 | 0,996 | 0,989 | 1 |
| Nek9      | 0,911168 | 0,032066 | 0,396 | 0,42  | 1 |
| Gfod1     | 0,911493 | 0,002529 | 0,116 | 0,118 | 1 |
| Afap1l1   | 0,912539 | 0,056754 | 0,4   | 0,445 | 1 |
| Srpk2     | 0,913088 | 0,01712  | 0,662 | 0,743 | 1 |
| Ptk2b     | 0,913111 | 0,010515 | 0,039 | 0,04  | 1 |
| Nln       | 0,913239 | 0,030728 | 0,228 | 0,23  | 1 |
| Galt      | 0,913257 | 0,004486 | 0,022 | 0,021 | 1 |
| Nupr1l    | 0,913257 | 0,006273 | 0,022 | 0,021 | 1 |
| Mutyh     | 0,913471 | 0,007774 | 0,022 | 0,023 | 1 |
| Pcdhgb7   | 0,913472 | 0,007493 | 0,022 | 0,023 | 1 |
| Pdgfa     | 0,913901 | 0,014912 | 0,956 | 0,937 | 1 |
| Gm28959   | 0,913931 | 0,004209 | 0,022 | 0,021 | 1 |
| Armcx3    | 0,914001 | 0,033109 | 0,44  | 0,47  | 1 |
| Ino80d    | 0,914309 | 0,068199 | 0,519 | 0,576 | 1 |

|           |          |          |       |       |   |
|-----------|----------|----------|-------|-------|---|
| Polm      | 0,914379 | 0,004437 | 0,073 | 0,072 | 1 |
| Akap2     | 0,914593 | 0,01212  | 0,095 | 0,099 | 1 |
| Eme2      | 0,91461  | 0,00461  | 0,035 | 0,034 | 1 |
| Vps33a    | 0,914631 | 0,008671 | 0,226 | 0,234 | 1 |
| Caprin1   | 0,915069 | 0,033932 | 0,706 | 0,738 | 1 |
| Prdm2     | 0,915766 | 0,038784 | 0,352 | 0,365 | 1 |
| Setx      | 0,915821 | 0,062015 | 0,402 | 0,445 | 1 |
| Pde1c     | 0,916238 | 0,032722 | 0,297 | 0,302 | 1 |
| Nhlrc2    | 0,916596 | 0,037352 | 0,288 | 0,308 | 1 |
| Zfp469    | 0,916619 | 0,008058 | 0,022 | 0,021 | 1 |
| Sept3     | 0,916957 | 0,004209 | 0,022 | 0,021 | 1 |
| Psmc3ip   | 0,917909 | 0,011082 | 0,037 | 0,036 | 1 |
| Tex10     | 0,91792  | 0,026065 | 0,286 | 0,297 | 1 |
| Jmjd4     | 0,918143 | 0,005549 | 0,039 | 0,04  | 1 |
| Kdm8      | 0,918143 | 0,009051 | 0,039 | 0,04  | 1 |
| Ttbk2     | 0,918749 | 0,065166 | 0,374 | 0,403 | 1 |
| Larp4b    | 0,918761 | 0,063384 | 0,547 | 0,591 | 1 |
| Twink     | 0,919022 | 0,023917 | 0,16  | 0,167 | 1 |
| Tram111   | 0,919784 | 0,006133 | 0,07  | 0,072 | 1 |
| Rragc     | 0,920353 | 0,048925 | 0,534 | 0,584 | 1 |
| Fgfr1op2  | 0,920842 | 0,017505 | 0,659 | 0,703 | 1 |
| Itпка     | 0,921277 | -0,00238 | 0,002 | 0,002 | 1 |
| Tmem212   | 0,921277 | -0,00238 | 0,002 | 0,002 | 1 |
| Orc1      | 0,921277 | -0,00238 | 0,002 | 0,002 | 1 |
| Rbakdn    | 0,921277 | -0,00238 | 0,002 | 0,002 | 1 |
| Slc16a13  | 0,921277 | -0,00238 | 0,002 | 0,002 | 1 |
| Dock11    | 0,921277 | -0,00291 | 0,002 | 0,002 | 1 |
| St8sia3   | 0,921277 | -0,00448 | 0,002 | 0,002 | 1 |
| Tmem158   | 0,921277 | -0,00474 | 0,002 | 0,002 | 1 |
| Col4a1    | 0,921277 | -0,00657 | 0,002 | 0,002 | 1 |
| Prkab2    | 0,921519 | 0,001194 | 0,07  | 0,072 | 1 |
| Ube3b     | 0,922021 | 0,0204   | 0,246 | 0,251 | 1 |
| Mterf1b   | 0,922278 | 0,000902 | 0,02  | 0,021 | 1 |
| A830018L1 | 0,922382 | -0,00027 | 0,002 | 0,002 | 1 |
| Gm28981   | 0,922382 | -0,00027 | 0,002 | 0,002 | 1 |
| Wnt6      | 0,922382 | -0,00027 | 0,002 | 0,002 | 1 |
| Sphkap    | 0,922382 | -0,00027 | 0,002 | 0,002 | 1 |
| Ackr3     | 0,922382 | -0,00027 | 0,002 | 0,002 | 1 |
| Syt2      | 0,922382 | -0,00027 | 0,002 | 0,002 | 1 |
| Ptpn7     | 0,922382 | -0,00027 | 0,002 | 0,002 | 1 |
| Pkp1      | 0,922382 | -0,00027 | 0,002 | 0,002 | 1 |
| Ptprc     | 0,922382 | -0,00027 | 0,002 | 0,002 | 1 |
| Prrx1     | 0,922382 | -0,00027 | 0,002 | 0,002 | 1 |
| Arhgap30  | 0,922382 | -0,00027 | 0,002 | 0,002 | 1 |
| Ccdc121   | 0,922382 | -0,00027 | 0,002 | 0,002 | 1 |
| Slc39a12  | 0,922382 | -0,00027 | 0,002 | 0,002 | 1 |
| Scn1a     | 0,922382 | -0,00027 | 0,002 | 0,002 | 1 |
| Chrna1os  | 0,922382 | -0,00027 | 0,002 | 0,002 | 1 |
| Olf1284   | 0,922382 | -0,00027 | 0,002 | 0,002 | 1 |
| Ryr3      | 0,922382 | -0,00027 | 0,002 | 0,002 | 1 |
| Bub1b     | 0,922382 | -0,00027 | 0,002 | 0,002 | 1 |
| Gm14978   | 0,922382 | -0,00027 | 0,002 | 0,002 | 1 |

|           |          |          |       |       |   |
|-----------|----------|----------|-------|-------|---|
| Il1a      | 0,922382 | -0,00027 | 0,002 | 0,002 | 1 |
| Pax1      | 0,922382 | -0,00027 | 0,002 | 0,002 | 1 |
| Lpin3     | 0,922382 | -0,00027 | 0,002 | 0,002 | 1 |
| Ube2c     | 0,922382 | -0,00027 | 0,002 | 0,002 | 1 |
| Zfp217    | 0,922382 | -0,00027 | 0,002 | 0,002 | 1 |
| Gm14393   | 0,922382 | -0,00027 | 0,002 | 0,002 | 1 |
| Xlr       | 0,922382 | -0,00027 | 0,002 | 0,002 | 1 |
| 54304270  | 0,922382 | -0,00027 | 0,002 | 0,002 | 1 |
| Eda       | 0,922382 | -0,00027 | 0,002 | 0,002 | 1 |
| Gpr143    | 0,922382 | -0,00027 | 0,002 | 0,002 | 1 |
| Gm15726   | 0,922382 | -0,00027 | 0,002 | 0,002 | 1 |
| Gpr160    | 0,922382 | -0,00027 | 0,002 | 0,002 | 1 |
| Mccc1os   | 0,922382 | -0,00027 | 0,002 | 0,002 | 1 |
| Sertm1    | 0,922382 | -0,00027 | 0,002 | 0,002 | 1 |
| Igsf10    | 0,922382 | -0,00027 | 0,002 | 0,002 | 1 |
| Celf3     | 0,922382 | -0,00027 | 0,002 | 0,002 | 1 |
| Gm20633   | 0,922382 | -0,00027 | 0,002 | 0,002 | 1 |
| Fcgr1     | 0,922382 | -0,00027 | 0,002 | 0,002 | 1 |
| Ankrd34a  | 0,922382 | -0,00027 | 0,002 | 0,002 | 1 |
| Ngf       | 0,922382 | -0,00027 | 0,002 | 0,002 | 1 |
| Ptpn22    | 0,922382 | -0,00027 | 0,002 | 0,002 | 1 |
| Kcnd3     | 0,922382 | -0,00027 | 0,002 | 0,002 | 1 |
| Gm26530   | 0,922382 | -0,00027 | 0,002 | 0,002 | 1 |
| Alpk1     | 0,922382 | -0,00027 | 0,002 | 0,002 | 1 |
| Gbp5      | 0,922382 | -0,00027 | 0,002 | 0,002 | 1 |
| B230334C  | 0,922382 | -0,00027 | 0,002 | 0,002 | 1 |
| Gm26857   | 0,922382 | -0,00027 | 0,002 | 0,002 | 1 |
| Runx1t1   | 0,922382 | -0,00027 | 0,002 | 0,002 | 1 |
| Gm20878   | 0,922382 | -0,00027 | 0,002 | 0,002 | 1 |
| Brinp1    | 0,922382 | -0,00027 | 0,002 | 0,002 | 1 |
| Ror1      | 0,922382 | -0,00027 | 0,002 | 0,002 | 1 |
| Bend5     | 0,922382 | -0,00027 | 0,002 | 0,002 | 1 |
| Runx3     | 0,922382 | -0,00027 | 0,002 | 0,002 | 1 |
| Mxra8     | 0,922382 | -0,00027 | 0,002 | 0,002 | 1 |
| Isg15     | 0,922382 | -0,00027 | 0,002 | 0,002 | 1 |
| Cdk6      | 0,922382 | -0,00027 | 0,002 | 0,002 | 1 |
| Gbp9      | 0,922382 | -0,00027 | 0,002 | 0,002 | 1 |
| Myo1h     | 0,922382 | -0,00027 | 0,002 | 0,002 | 1 |
| Gm16001   | 0,922382 | -0,00027 | 0,002 | 0,002 | 1 |
| Caln1     | 0,922382 | -0,00027 | 0,002 | 0,002 | 1 |
| Card11    | 0,922382 | -0,00027 | 0,002 | 0,002 | 1 |
| Gm20635   | 0,922382 | -0,00027 | 0,002 | 0,002 | 1 |
| Tex26     | 0,922382 | -0,00027 | 0,002 | 0,002 | 1 |
| Cd8b1     | 0,922382 | -0,00027 | 0,002 | 0,002 | 1 |
| Slc4a5    | 0,922382 | -0,00027 | 0,002 | 0,002 | 1 |
| Gm26588   | 0,922382 | -0,00027 | 0,002 | 0,002 | 1 |
| Alox5     | 0,922382 | -0,00027 | 0,002 | 0,002 | 1 |
| Iqsec3    | 0,922382 | -0,00027 | 0,002 | 0,002 | 1 |
| Ptpn6     | 0,922382 | -0,00027 | 0,002 | 0,002 | 1 |
| Rasl2-9   | 0,922382 | -0,00027 | 0,002 | 0,002 | 1 |
| Catsperg1 | 0,922382 | -0,00027 | 0,002 | 0,002 | 1 |
| Hpn       | 0,922382 | -0,00027 | 0,002 | 0,002 | 1 |

|           |          |          |       |       |   |
|-----------|----------|----------|-------|-------|---|
| Gm12781   | 0,922382 | -0,00027 | 0,002 | 0,002 | 1 |
| Tdrd12    | 0,922382 | -0,00027 | 0,002 | 0,002 | 1 |
| Mir9-3hg  | 0,922382 | -0,00027 | 0,002 | 0,002 | 1 |
| Homer2    | 0,922382 | -0,00027 | 0,002 | 0,002 | 1 |
| Folr2     | 0,922382 | -0,00027 | 0,002 | 0,002 | 1 |
| Olf472    | 0,922382 | -0,00027 | 0,002 | 0,002 | 1 |
| Gm47710   | 0,922382 | -0,00027 | 0,002 | 0,002 | 1 |
| Abrac1    | 0,922382 | -0,00027 | 0,002 | 0,002 | 1 |
| Ddo       | 0,922382 | -0,00027 | 0,002 | 0,002 | 1 |
| 2810425M  | 0,922382 | -0,00027 | 0,002 | 0,002 | 1 |
| 4921516A  | 0,922382 | -0,00027 | 0,002 | 0,002 | 1 |
| Amh       | 0,922382 | -0,00027 | 0,002 | 0,002 | 1 |
| 1500009L1 | 0,922382 | -0,00027 | 0,002 | 0,002 | 1 |
| Ppp1r3b   | 0,922382 | -0,00027 | 0,002 | 0,002 | 1 |
| Sorbs2    | 0,922382 | -0,00027 | 0,002 | 0,002 | 1 |
| Neil3     | 0,922382 | -0,00027 | 0,002 | 0,002 | 1 |
| Lyl1      | 0,922382 | -0,00027 | 0,002 | 0,002 | 1 |
| G430095P  | 0,922382 | -0,00027 | 0,002 | 0,002 | 1 |
| Exoc3l    | 0,922382 | -0,00027 | 0,002 | 0,002 | 1 |
| Il34      | 0,922382 | -0,00027 | 0,002 | 0,002 | 1 |
| Vstm4     | 0,922382 | -0,00027 | 0,002 | 0,002 | 1 |
| Gm48933   | 0,922382 | -0,00027 | 0,002 | 0,002 | 1 |
| Olf4731   | 0,922382 | -0,00027 | 0,002 | 0,002 | 1 |
| Klhl33    | 0,922382 | -0,00027 | 0,002 | 0,002 | 1 |
| Psmb11    | 0,922382 | -0,00027 | 0,002 | 0,002 | 1 |
| Thtpa     | 0,922382 | -0,00027 | 0,002 | 0,002 | 1 |
| Fut4      | 0,922382 | -0,00027 | 0,002 | 0,002 | 1 |
| Zfp872    | 0,922382 | -0,00027 | 0,002 | 0,002 | 1 |
| Olf4986   | 0,922382 | -0,00027 | 0,002 | 0,002 | 1 |
| Tex12     | 0,922382 | -0,00027 | 0,002 | 0,002 | 1 |
| Gm47271   | 0,922382 | -0,00027 | 0,002 | 0,002 | 1 |
| Ccnb2     | 0,922382 | -0,00027 | 0,002 | 0,002 | 1 |
| Cacna2d2  | 0,922382 | -0,00027 | 0,002 | 0,002 | 1 |
| Susd5     | 0,922382 | -0,00027 | 0,002 | 0,002 | 1 |
| Gm12116   | 0,922382 | -0,00027 | 0,002 | 0,002 | 1 |
| Gm10447   | 0,922382 | -0,00027 | 0,002 | 0,002 | 1 |
| Gira1     | 0,922382 | -0,00027 | 0,002 | 0,002 | 1 |
| Ntn1      | 0,922382 | -0,00027 | 0,002 | 0,002 | 1 |
| Olf392    | 0,922382 | -0,00027 | 0,002 | 0,002 | 1 |
| Mmp28     | 0,922382 | -0,00027 | 0,002 | 0,002 | 1 |
| Tom1l1    | 0,922382 | -0,00027 | 0,002 | 0,002 | 1 |
| Car10     | 0,922382 | -0,00027 | 0,002 | 0,002 | 1 |
| Spata20   | 0,922382 | -0,00027 | 0,002 | 0,002 | 1 |
| Gm11639   | 0,922382 | -0,00027 | 0,002 | 0,002 | 1 |
| Cd300c2   | 0,922382 | -0,00027 | 0,002 | 0,002 | 1 |
| Gm11772   | 0,922382 | -0,00027 | 0,002 | 0,002 | 1 |
| Inhba     | 0,922382 | -0,00027 | 0,002 | 0,002 | 1 |
| Hist1h2br | 0,922382 | -0,00027 | 0,002 | 0,002 | 1 |
| Hist1h2ad | 0,922382 | -0,00027 | 0,002 | 0,002 | 1 |
| Hist1h2ab | 0,922382 | -0,00027 | 0,002 | 0,002 | 1 |
| D130043K  | 0,922382 | -0,00027 | 0,002 | 0,002 | 1 |
| Serpib9   | 0,922382 | -0,00027 | 0,002 | 0,002 | 1 |

|           |          |          |       |       |   |
|-----------|----------|----------|-------|-------|---|
| Gm48707   | 0,922382 | -0,00027 | 0,002 | 0,002 | 1 |
| Ly86      | 0,922382 | -0,00027 | 0,002 | 0,002 | 1 |
| Gm47732   | 0,922382 | -0,00027 | 0,002 | 0,002 | 1 |
| Gm28707   | 0,922382 | -0,00027 | 0,002 | 0,002 | 1 |
| Rnf182    | 0,922382 | -0,00027 | 0,002 | 0,002 | 1 |
| Susd3     | 0,922382 | -0,00027 | 0,002 | 0,002 | 1 |
| Gprin1    | 0,922382 | -0,00027 | 0,002 | 0,002 | 1 |
| Adcy2     | 0,922382 | -0,00027 | 0,002 | 0,002 | 1 |
| Gm17750   | 0,922382 | -0,00027 | 0,002 | 0,002 | 1 |
| 4833422C: | 0,922382 | -0,00027 | 0,002 | 0,002 | 1 |
| Pygl      | 0,922382 | -0,00027 | 0,002 | 0,002 | 1 |
| Sptb      | 0,922382 | -0,00027 | 0,002 | 0,002 | 1 |
| Noxred1   | 0,922382 | -0,00027 | 0,002 | 0,002 | 1 |
| Gm16006   | 0,922382 | -0,00027 | 0,002 | 0,002 | 1 |
| C1qtnf6   | 0,922382 | -0,00027 | 0,002 | 0,002 | 1 |
| AL590144. | 0,922382 | -0,00027 | 0,002 | 0,002 | 1 |
| Gm20324   | 0,922382 | -0,00027 | 0,002 | 0,002 | 1 |
| Gtse1     | 0,922382 | -0,00027 | 0,002 | 0,002 | 1 |
| Mapk12    | 0,922382 | -0,00027 | 0,002 | 0,002 | 1 |
| Nckap1l   | 0,922382 | -0,00027 | 0,002 | 0,002 | 1 |
| Glis2     | 0,922382 | -0,00027 | 0,002 | 0,002 | 1 |
| Ifitm7    | 0,922382 | -0,00027 | 0,002 | 0,002 | 1 |
| Chrd      | 0,922382 | -0,00027 | 0,002 | 0,002 | 1 |
| B630019A: | 0,922382 | -0,00027 | 0,002 | 0,002 | 1 |
| Tmem44    | 0,922382 | -0,00027 | 0,002 | 0,002 | 1 |
| Gm15564   | 0,922382 | -0,00027 | 0,002 | 0,002 | 1 |
| Robo2     | 0,922382 | -0,00027 | 0,002 | 0,002 | 1 |
| Prss27    | 0,922382 | -0,00027 | 0,002 | 0,002 | 1 |
| Rhbdl1    | 0,922382 | -0,00027 | 0,002 | 0,002 | 1 |
| Ip6k3     | 0,922382 | -0,00027 | 0,002 | 0,002 | 1 |
| Spdef     | 0,922382 | -0,00027 | 0,002 | 0,002 | 1 |
| Aif1      | 0,922382 | -0,00027 | 0,002 | 0,002 | 1 |
| Lst1      | 0,922382 | -0,00027 | 0,002 | 0,002 | 1 |
| Zfp57     | 0,922382 | -0,00027 | 0,002 | 0,002 | 1 |
| Fhod3     | 0,922382 | -0,00027 | 0,002 | 0,002 | 1 |
| Efemp2    | 0,922382 | -0,00027 | 0,002 | 0,002 | 1 |
| Lpxn      | 0,922382 | -0,00027 | 0,002 | 0,002 | 1 |
| Pcsk5     | 0,922382 | -0,00027 | 0,002 | 0,002 | 1 |
| Cnm1      | 0,922382 | -0,00027 | 0,002 | 0,002 | 1 |
| Ablim1    | 0,922382 | -0,00027 | 0,002 | 0,002 | 1 |
| Rorc      | 0,922382 | -0,00055 | 0,002 | 0,002 | 1 |
| Ints4     | 0,922799 | 0,053983 | 0,343 | 0,371 | 1 |
| Jarid2    | 0,922938 | 0,07057  | 0,457 | 0,504 | 1 |
| Cldn19    | 0,923487 | 0,013376 | 0,002 | 0,002 | 1 |
| Col14a1   | 0,923487 | 0,005205 | 0,002 | 0,002 | 1 |
| Vwa5b2    | 0,923487 | 0,005205 | 0,002 | 0,002 | 1 |
| Fgl1      | 0,923487 | 0,003382 | 0,002 | 0,002 | 1 |
| Klhl3     | 0,923487 | 0,003382 | 0,002 | 0,002 | 1 |
| Efna5     | 0,923487 | 0,003382 | 0,002 | 0,002 | 1 |
| 1500015O: | 0,923487 | 0,001556 | 0,002 | 0,002 | 1 |
| Gm20753   | 0,923487 | 0,001556 | 0,002 | 0,002 | 1 |
| Ar        | 0,923487 | 0,001556 | 0,002 | 0,002 | 1 |

|           |          |          |       |       |   |
|-----------|----------|----------|-------|-------|---|
| Gbp2      | 0,923487 | 0,001556 | 0,002 | 0,002 | 1 |
| Gabbr2    | 0,923487 | 0,001556 | 0,002 | 0,002 | 1 |
| Rab42     | 0,923487 | 0,001556 | 0,002 | 0,002 | 1 |
| Ncf1      | 0,923487 | 0,001556 | 0,002 | 0,002 | 1 |
| Siglech   | 0,923487 | 0,001556 | 0,002 | 0,002 | 1 |
| Gm15880   | 0,923487 | 0,001556 | 0,002 | 0,002 | 1 |
| Cnn2      | 0,923487 | 0,001556 | 0,002 | 0,002 | 1 |
| Rmst      | 0,923487 | 0,001556 | 0,002 | 0,002 | 1 |
| Arhgap10  | 0,923487 | 0,001556 | 0,002 | 0,002 | 1 |
| Tbc1d9    | 0,923487 | 0,001556 | 0,002 | 0,002 | 1 |
| Erc2      | 0,923487 | 0,001556 | 0,002 | 0,002 | 1 |
| Lrrc18    | 0,923487 | 0,001556 | 0,002 | 0,002 | 1 |
| Zic1      | 0,923487 | 0,001556 | 0,002 | 0,002 | 1 |
| Plod2     | 0,923487 | 0,001556 | 0,002 | 0,002 | 1 |
| 4930500F1 | 0,923487 | 0,001556 | 0,002 | 0,002 | 1 |
| 6430571L1 | 0,923487 | 0,001556 | 0,002 | 0,002 | 1 |
| Gm26542   | 0,923487 | 0,001556 | 0,002 | 0,002 | 1 |
| Shc3      | 0,923487 | 0,001556 | 0,002 | 0,002 | 1 |
| Spata9    | 0,923487 | 0,001556 | 0,002 | 0,002 | 1 |
| Mis18bp1  | 0,923487 | 0,001556 | 0,002 | 0,002 | 1 |
| Ak7       | 0,923487 | 0,001556 | 0,002 | 0,002 | 1 |
| Rimbp3    | 0,923487 | 0,001556 | 0,002 | 0,002 | 1 |
| 4632428C  | 0,923487 | 0,001556 | 0,002 | 0,002 | 1 |
| AC150035. | 0,923487 | 0,001556 | 0,002 | 0,002 | 1 |
| Syt7      | 0,923487 | 0,001556 | 0,002 | 0,002 | 1 |
| Ms4a7     | 0,923487 | 0,001556 | 0,002 | 0,002 | 1 |
| Pja2      | 0,92356  | 0,037393 | 0,778 | 0,81  | 1 |
| N4bp2     | 0,923721 | 0,014039 | 0,101 | 0,103 | 1 |
| Khynyn    | 0,923792 | 0,008273 | 0,134 | 0,137 | 1 |
| Smc1a     | 0,923915 | 0,008814 | 0,732 | 0,747 | 1 |
| Zfp90     | 0,924901 | 0,040215 | 0,22  | 0,234 | 1 |
| Foxo4     | 0,924966 | 0,020698 | 0,152 | 0,156 | 1 |
| Colec11   | 0,925723 | 0,006273 | 0,02  | 0,021 | 1 |
| Phf8      | 0,92594  | 0,035029 | 0,266 | 0,283 | 1 |
| Atad1     | 0,926058 | 0,029753 | 0,661 | 0,698 | 1 |
| Rundc1    | 0,926386 | 0,016385 | 0,149 | 0,154 | 1 |
| Rps6kb2   | 0,926924 | 0,027604 | 0,222 | 0,226 | 1 |
| Nop2      | 0,927337 | 0,029498 | 0,119 | 0,12  | 1 |
| Smc3      | 0,927596 | 0,03065  | 0,727 | 0,762 | 1 |
| Sympk     | 0,927861 | 0,029655 | 0,497 | 0,549 | 1 |
| Dennd1a   | 0,927928 | 0,034993 | 0,376 | 0,388 | 1 |
| Ggcx      | 0,928077 | 0,019989 | 0,099 | 0,103 | 1 |
| Socs5     | 0,928289 | 0,038508 | 0,281 | 0,293 | 1 |
| Traf7     | 0,928819 | 0,03153  | 0,18  | 0,19  | 1 |
| Foxp1     | 0,928913 | 0,03389  | 0,624 | 0,654 | 1 |
| Klc4      | 0,929575 | 0,010115 | 0,079 | 0,078 | 1 |
| Kat2b     | 0,929738 | 0,017446 | 0,723 | 0,77  | 1 |
| Zyg11b    | 0,930055 | 0,024106 | 0,316 | 0,329 | 1 |
| Zzef1     | 0,930397 | 0,067971 | 0,347 | 0,369 | 1 |
| Zfp36l1   | 0,93055  | 0,012228 | 0,02  | 0,021 | 1 |
| Rpl3      | 0,930822 | 0,038239 | 0,998 | 0,996 | 1 |
| Ttc21b    | 0,931039 | 0,035068 | 0,13  | 0,131 | 1 |

|           |          |          |       |       |   |
|-----------|----------|----------|-------|-------|---|
| Creb3l2   | 0,931745 | 0,064759 | 0,519 | 0,555 | 1 |
| Ccdc82    | 0,93224  | 0,048149 | 0,222 | 0,234 | 1 |
| Atp9b     | 0,932372 | 0,0349   | 0,279 | 0,291 | 1 |
| Eif3d     | 0,932764 | 0,018552 | 0,642 | 0,698 | 1 |
| Adcy6     | 0,934559 | 0,011205 | 0,072 | 0,074 | 1 |
| Pcm1      | 0,93525  | 0,012294 | 0,897 | 0,892 | 1 |
| D630045J1 | 0,935572 | 0,011327 | 0,024 | 0,023 | 1 |
| Gm26508   | 0,935572 | 0,009552 | 0,024 | 0,023 | 1 |
| Syt3      | 0,935699 | 0,009732 | 0,053 | 0,055 | 1 |
| Alkbh2    | 0,935903 | 0,000803 | 0,035 | 0,036 | 1 |
| Yy1       | 0,936097 | 0,014095 | 0,732 | 0,764 | 1 |
| Ctc1      | 0,936383 | 0,02294  | 0,136 | 0,141 | 1 |
| Rfx5      | 0,93664  | 0,009118 | 0,051 | 0,051 | 1 |
| Xkr6      | 0,936672 | 0,040683 | 0,163 | 0,167 | 1 |
| Icmt      | 0,936776 | 0,010846 | 0,284 | 0,293 | 1 |
| A730015C: | 0,936804 | 0,009489 | 0,011 | 0,011 | 1 |
| Nek1      | 0,93751  | 0,046971 | 0,206 | 0,211 | 1 |
| Wrn       | 0,937628 | 0,038421 | 0,292 | 0,31  | 1 |
| Opa1      | 0,937781 | 0,023849 | 0,554 | 0,608 | 1 |
| Itch      | 0,938258 | -0,01202 | 0,912 | 0,911 | 1 |
| Gabarapl1 | 0,938571 | 0,018941 | 0,895 | 0,867 | 1 |
| Rad51     | 0,939125 | 0,004209 | 0,024 | 0,023 | 1 |
| Cyb5d1    | 0,939125 | 0,004209 | 0,024 | 0,023 | 1 |
| Cdh24     | 0,939175 | 0,004079 | 0,011 | 0,011 | 1 |
| Nes       | 0,939175 | 0,018442 | 0,011 | 0,011 | 1 |
| Atp1a3    | 0,939175 | 0,01487  | 0,011 | 0,011 | 1 |
| Gm28230   | 0,939175 | 0,007689 | 0,011 | 0,011 | 1 |
| Gm16751   | 0,939175 | 0,007689 | 0,011 | 0,011 | 1 |
| Slc26a6   | 0,939175 | 0,005886 | 0,011 | 0,011 | 1 |
| Pknx1     | 0,939277 | 0,058134 | 0,297 | 0,312 | 1 |
| Prpf4b    | 0,939662 | 0,043315 | 0,877 | 0,863 | 1 |
| Eif4a2    | 0,93967  | 0,021794 | 0,932 | 0,932 | 1 |
| Cirbp     | 0,939733 | 0,045333 | 0,716 | 0,753 | 1 |
| Pcdhb7    | 0,939774 | 0,006932 | 0,024 | 0,023 | 1 |
| Mhrt      | 0,940101 | -0,0009  | 0,018 | 0,019 | 1 |
| Garnl3    | 0,940367 | 0,032368 | 0,141 | 0,143 | 1 |
| Ing1      | 0,940868 | 0,080368 | 0,396 | 0,428 | 1 |
| Rbm8a2    | 0,941546 | 0,002269 | 0,011 | 0,011 | 1 |
| Gm32568   | 0,941546 | 0,002269 | 0,011 | 0,011 | 1 |
| Senp3     | 0,941661 | 0,03509  | 0,284 | 0,295 | 1 |
| Rag1      | 0,942021 | 0,001993 | 0,011 | 0,011 | 1 |
| Cspg4     | 0,942021 | 0,001993 | 0,011 | 0,011 | 1 |
| 7630403G: | 0,942495 | 0,001719 | 0,011 | 0,011 | 1 |
| 1300017JC | 0,942965 | 0,015162 | 0,02  | 0,021 | 1 |
| Hsf4      | 0,943001 | 0,000632 | 0,018 | 0,019 | 1 |
| Parp6     | 0,943109 | 0,032365 | 0,161 | 0,169 | 1 |
| Gm28050   | 0,943363 | 0,000902 | 0,018 | 0,019 | 1 |
| U2af1l4   | 0,943725 | 0,00297  | 0,018 | 0,019 | 1 |
| 8030442B( | 0,943918 | 0,000456 | 0,011 | 0,011 | 1 |
| Rimklb    | 0,943918 | 0,000456 | 0,011 | 0,011 | 1 |
| 1700112J1 | 0,943918 | 0,000456 | 0,011 | 0,011 | 1 |
| Ict1os    | 0,943918 | 0,000456 | 0,011 | 0,011 | 1 |



|           |          |          |       |       |   |
|-----------|----------|----------|-------|-------|---|
| Greb1     | 0,943918 | 0,000456 | 0,011 | 0,011 | 1 |
| Tiam2     | 0,943918 | 0,000456 | 0,011 | 0,011 | 1 |
| Tulp2     | 0,943918 | 0,001993 | 0,011 | 0,011 | 1 |
| Alg10b    | 0,944087 | 0,007429 | 0,156 | 0,156 | 1 |
| Ubox5     | 0,944334 | 0,001812 | 0,064 | 0,065 | 1 |
| Gm13199   | 0,944393 | 0,000183 | 0,011 | 0,011 | 1 |
| Adam8     | 0,944393 | 0,000183 | 0,011 | 0,011 | 1 |
| Kiss1r    | 0,944393 | 0,000183 | 0,011 | 0,011 | 1 |
| 4931414P: | 0,944932 | 0,004337 | 0,035 | 0,036 | 1 |
| Zxdb      | 0,946101 | 0,008022 | 0,136 | 0,135 | 1 |
| Hs3st1    | 0,946144 | 0,019924 | 0,776 | 0,827 | 1 |
| Cdk5r1    | 0,946542 | 0,019602 | 0,07  | 0,072 | 1 |
| Cdt1      | 0,946626 | 0,002696 | 0,018 | 0,019 | 1 |
| Enc1      | 0,946765 | -0,00163 | 0,011 | 0,011 | 1 |
| Gnal      | 0,946765 | -0,00163 | 0,011 | 0,011 | 1 |
| Copb2     | 0,94707  | 0,070414 | 0,457 | 0,504 | 1 |
| Bbx       | 0,9472   | 0,008446 | 0,563 | 0,578 | 1 |
| Coa7      | 0,947646 | 0,021045 | 0,106 | 0,11  | 1 |
| Gid4      | 0,947824 | 0,056289 | 0,378 | 0,416 | 1 |
| Plekhf1   | 0,947854 | 0,030785 | 0,312 | 0,329 | 1 |
| Pcnx      | 0,947953 | 0,059399 | 0,266 | 0,287 | 1 |
| Ada       | 0,948118 | 0,004816 | 0,081 | 0,082 | 1 |
| Zscan22   | 0,948983 | 0,021609 | 0,103 | 0,103 | 1 |
| Atf1      | 0,949436 | 0,050734 | 0,281 | 0,302 | 1 |
| Gm34961   | 0,950252 | 0,004764 | 0,018 | 0,019 | 1 |
| Adar      | 0,950297 | 0,011777 | 0,165 | 0,169 | 1 |
| Ldb1      | 0,9503   | 0,030749 | 0,295 | 0,302 | 1 |
| Car5b     | 0,950442 | -0,00143 | 0,024 | 0,023 | 1 |
| Kif1c     | 0,951045 | 0,019486 | 0,183 | 0,186 | 1 |
| 2410131K: | 0,951474 | 0,016158 | 0,128 | 0,129 | 1 |
| Map4k5    | 0,95229  | 0,012086 | 0,666 | 0,684 | 1 |
| Comt      | 0,952341 | 0,016768 | 0,743 | 0,759 | 1 |
| Srcap     | 0,953267 | 0,033524 | 0,316 | 0,327 | 1 |
| Depdc1b   | 0,953349 | 0,003656 | 0,051 | 0,051 | 1 |
| Sprtn     | 0,953659 | 0,012551 | 0,174 | 0,175 | 1 |
| Dap       | 0,953753 | 0,009845 | 0,083 | 0,082 | 1 |
| Gm10138   | 0,953794 | 0,015122 | 0,084 | 0,086 | 1 |
| Chd3      | 0,953967 | 0,007858 | 0,035 | 0,036 | 1 |
| Tcerg1    | 0,954346 | 0,034183 | 0,378 | 0,401 | 1 |
| Zbtb38    | 0,954502 | 0,037032 | 0,809 | 0,844 | 1 |
| Sag       | 0,954648 | 0,009576 | 0,083 | 0,082 | 1 |
| Usp27x    | 0,955193 | 0,008772 | 0,039 | 0,038 | 1 |
| Gm47802   | 0,955449 | 0,011039 | 0,026 | 0,025 | 1 |
| 9130011E1 | 0,955776 | 0,022637 | 0,042 | 0,042 | 1 |
| Ppp1r13l  | 0,956419 | 0,008058 | 0,018 | 0,019 | 1 |
| Lypd1     | 0,956671 | -0,12903 | 0,037 | 0,036 | 1 |
| Fam78b    | 0,956782 | 0,008342 | 0,018 | 0,019 | 1 |
| Aqp11     | 0,956782 | 0,008342 | 0,018 | 0,019 | 1 |
| Ccnt2     | 0,956971 | 0,026462 | 0,653 | 0,698 | 1 |
| Ttll11    | 0,957423 | -0,0045  | 0,017 | 0,017 | 1 |
| Gpbp1l1   | 0,957473 | 0,050775 | 0,505 | 0,555 | 1 |
| Usp19     | 0,957862 | 0,033285 | 0,446 | 0,466 | 1 |

|           |          |          |       |       |   |
|-----------|----------|----------|-------|-------|---|
| Wdr82     | 0,957945 | 0,036464 | 0,272 | 0,283 | 1 |
| Gapvd1    | 0,95806  | 0,0483   | 0,615 | 0,65  | 1 |
| Zbtb39    | 0,958503 | 0,017018 | 0,103 | 0,105 | 1 |
| Rpl22     | 0,95858  | 0,03103  | 0,982 | 0,964 | 1 |
| Zkscan6   | 0,959157 | 0,020907 | 0,088 | 0,089 | 1 |
| Glce      | 0,959592 | -0,00381 | 0,051 | 0,051 | 1 |
| Atf6      | 0,959598 | 0,056517 | 0,349 | 0,378 | 1 |
| Sema3b    | 0,959731 | -0,00372 | 0,084 | 0,084 | 1 |
| Kdm5b     | 0,960652 | 0,062095 | 0,371 | 0,405 | 1 |
| Galnt18   | 0,960872 | -0,00243 | 0,017 | 0,017 | 1 |
| Ube2cbp   | 0,960872 | -0,00243 | 0,017 | 0,017 | 1 |
| Rp2       | 0,961114 | 0,022674 | 0,161 | 0,165 | 1 |
| Nkain1    | 0,961284 | 0,022164 | 0,624 | 0,667 | 1 |
| Pom121    | 0,961386 | 0,053446 | 0,378 | 0,418 | 1 |
| Slc26a1   | 0,961972 | 0,00461  | 0,033 | 0,034 | 1 |
| Zfhx2os   | 0,962211 | 0,01148  | 0,066 | 0,068 | 1 |
| D17Wsu92  | 0,96231  | 0,030321 | 0,545 | 0,584 | 1 |
| Cadm1     | 0,962782 | 0,084162 | 0,754 | 0,783 | 1 |
| Pex26     | 0,963387 | 0,010337 | 0,066 | 0,068 | 1 |
| Por       | 0,963497 | 0,063121 | 0,426 | 0,466 | 1 |
| Secisbp2l | 0,963654 | 0,014745 | 0,987 | 0,981 | 1 |
| Tm9sf4    | 0,963878 | 0,036915 | 0,433 | 0,47  | 1 |
| Papd5     | 0,964039 | 0,048    | 0,297 | 0,314 | 1 |
| Myo1e     | 0,964246 | 0,055112 | 0,565 | 0,637 | 1 |
| Mlkl      | 0,964322 | -0,00036 | 0,017 | 0,017 | 1 |
| Noc4l     | 0,964426 | 0,012966 | 0,114 | 0,116 | 1 |
| Vps35     | 0,965806 | 0,003315 | 0,895 | 0,914 | 1 |
| Jak2      | 0,965857 | 0,039113 | 0,417 | 0,445 | 1 |
| Gsdme     | 0,966192 | -0,00097 | 0,031 | 0,032 | 1 |
| Metrn1    | 0,966286 | 0,019915 | 0,013 | 0,013 | 1 |
| Kremen1   | 0,966412 | 0,031629 | 0,182 | 0,188 | 1 |
| Zim1      | 0,966623 | 0,000902 | 0,017 | 0,017 | 1 |
| Aldh18a1  | 0,967006 | 0,001173 | 0,017 | 0,017 | 1 |
| Stard9    | 0,967059 | 0,022452 | 0,237 | 0,243 | 1 |
| Snhg12    | 0,967063 | 0,05089  | 0,451 | 0,485 | 1 |
| Arv1      | 0,96716  | 0,005929 | 0,048 | 0,049 | 1 |
| Gm43625   | 0,967389 | 0,003246 | 0,017 | 0,017 | 1 |
| Gm37027   | 0,967389 | 0,001446 | 0,017 | 0,017 | 1 |
| Atf2      | 0,96764  | 0,047895 | 0,484 | 0,527 | 1 |
| Mmp16     | 0,968838 | -0,00044 | 0,026 | 0,025 | 1 |
| Plekha4   | 0,968912 | 0,010994 | 0,013 | 0,013 | 1 |
| Rapgef1   | 0,968912 | 0,014572 | 0,013 | 0,013 | 1 |
| Qser1     | 0,969062 | 0,01958  | 0,251 | 0,255 | 1 |
| Bcl7c     | 0,96912  | 0,042541 | 0,477 | 0,53  | 1 |
| Ptprj     | 0,969246 | 0,009953 | 0,04  | 0,04  | 1 |
| Rims2     | 0,969548 | -0,00356 | 0,046 | 0,046 | 1 |
| Mybbp1a   | 0,969565 | 0,056855 | 0,409 | 0,443 | 1 |
| Chpf      | 0,969886 | 0,01649  | 0,088 | 0,089 | 1 |
| Gm7160    | 0,970457 | 0,003246 | 0,017 | 0,017 | 1 |
| Nras      | 0,970995 | 0,049098 | 0,655 | 0,705 | 1 |
| Crtc2     | 0,971114 | 0,031914 | 0,202 | 0,207 | 1 |
| Atxn2     | 0,971293 | 0,033954 | 0,719 | 0,766 | 1 |

|           |          |          |       |       |   |
|-----------|----------|----------|-------|-------|---|
| Pcnx3     | 0,971366 | 0,018607 | 0,286 | 0,289 | 1 |
| Soat1     | 0,971414 | 0,023186 | 0,218 | 0,219 | 1 |
| Bcas3os1  | 0,971538 | 0,005604 | 0,013 | 0,013 | 1 |
| Trio      | 0,971538 | 0,008913 | 0,013 | 0,013 | 1 |
| B3galnt1  | 0,972291 | 0,033375 | 0,18  | 0,188 | 1 |
| Suv39h2   | 0,972994 | 0,006749 | 0,04  | 0,04  | 1 |
| Gm26710   | 0,973142 | 0,004764 | 0,017 | 0,017 | 1 |
| Fndc4     | 0,973359 | 0,012566 | 0,048 | 0,049 | 1 |
| Map2k3os  | 0,973525 | 0,005043 | 0,017 | 0,017 | 1 |
| A330008L1 | 0,973525 | 0,006836 | 0,017 | 0,017 | 1 |
| 1700018LC | 0,973526 | 0,010126 | 0,017 | 0,017 | 1 |
| Smpd2     | 0,974093 | 0,020698 | 0,163 | 0,167 | 1 |
| Neurl2    | 0,974164 | 0,0038   | 0,013 | 0,013 | 1 |
| Gm10306   | 0,974164 | 0,009201 | 0,013 | 0,013 | 1 |
| Gm42067   | 0,974164 | 0,005604 | 0,013 | 0,013 | 1 |
| Nrd1      | 0,974483 | 0,008401 | 0,829 | 0,838 | 1 |
| Aste1     | 0,975179 | 0,017295 | 0,095 | 0,097 | 1 |
| Ep400     | 0,975362 | 0,057132 | 0,468 | 0,506 | 1 |
| Fzd4      | 0,975486 | 0,00461  | 0,031 | 0,032 | 1 |
| Ulk3      | 0,975649 | 0,016468 | 0,105 | 0,105 | 1 |
| Insr      | 0,975667 | 0,056536 | 0,347 | 0,369 | 1 |
| Cry2      | 0,975683 | 0,059375 | 0,277 | 0,295 | 1 |
| Rtel1     | 0,9759   | 0,007205 | 0,062 | 0,063 | 1 |
| Vps41     | 0,976393 | 0,048238 | 0,607 | 0,665 | 1 |
| Dlg4      | 0,976459 | 0,011722 | 0,057 | 0,057 | 1 |
| Stk36     | 0,97679  | 0,0038   | 0,013 | 0,013 | 1 |
| Gm17586   | 0,97679  | 0,001993 | 0,013 | 0,013 | 1 |
| Klhl25    | 0,97683  | 0,01346  | 0,081 | 0,082 | 1 |
| Mfsd6     | 0,97876  | 0,034097 | 0,712 | 0,774 | 1 |
| 1700055D  | 0,979417 | 0,000183 | 0,013 | 0,013 | 1 |
| Cnga1     | 0,979417 | 0,000183 | 0,013 | 0,013 | 1 |
| Tatdn2    | 0,979737 | 0,017764 | 0,193 | 0,198 | 1 |
| Slc35d2   | 0,979855 | -8,8E-05 | 0,013 | 0,013 | 1 |
| Tmem69    | 0,980163 | 0,004582 | 0,055 | 0,055 | 1 |
| Slc9b1    | 0,980293 | -0,00216 | 0,013 | 0,013 | 1 |
| C3        | 0,980293 | -0,00216 | 0,013 | 0,013 | 1 |
| Ksr1      | 0,980798 | 0,007025 | 0,231 | 0,234 | 1 |
| Sema4g    | 0,980896 | 0,018741 | 0,077 | 0,078 | 1 |
| Brd3      | 0,982049 | 0,041045 | 0,508 | 0,536 | 1 |
| Epb41     | 0,982483 | -0,01525 | 0,013 | 0,013 | 1 |
| Mob3a     | 0,982856 | 0,024051 | 0,253 | 0,264 | 1 |
| Farp1     | 0,983209 | -0,00149 | 0,086 | 0,086 | 1 |
| Parp2     | 0,983233 | 0,012054 | 0,171 | 0,173 | 1 |
| Crkl      | 0,983656 | 0,046601 | 0,365 | 0,397 | 1 |
| Reps2     | 0,983799 | 0,067412 | 0,327 | 0,357 | 1 |
| Map1lc3a  | 0,983876 | 0,015247 | 0,917 | 0,922 | 1 |
| Cdk18     | 0,984397 | 0,054724 | 0,666 | 0,707 | 1 |
| B230369F2 | 0,984556 | 0,027179 | 0,081 | 0,082 | 1 |
| Rras      | 0,985076 | 0,002392 | 0,097 | 0,097 | 1 |
| Tmco4     | 0,985268 | 0,006932 | 0,028 | 0,027 | 1 |
| A530017D  | 0,985519 | 0,006942 | 0,132 | 0,133 | 1 |
| Klhdc10   | 0,986157 | 0,022088 | 0,196 | 0,203 | 1 |

|           |          |          |       |       |   |
|-----------|----------|----------|-------|-------|---|
| Tet1      | 0,987013 | 0,051908 | 0,332 | 0,352 | 1 |
| Cenpn     | 0,987348 | 0,006202 | 0,046 | 0,046 | 1 |
| Cc2d1a    | 0,987428 | 0,017176 | 0,143 | 0,146 | 1 |
| Lgals4    | 0,98805  | 0,008216 | 0,046 | 0,046 | 1 |
| Scrib     | 0,988095 | 0,036312 | 0,299 | 0,314 | 1 |
| Pole2     | 0,989477 | 0,003113 | 0,028 | 0,027 | 1 |
| Kifc2     | 0,989804 | 0,030045 | 0,172 | 0,177 | 1 |
| Fam83b    | 0,989824 | 0,00107  | 0,029 | 0,03  | 1 |
| Dhx57     | 0,989868 | 0,02858  | 0,145 | 0,148 | 1 |
| Ywhah     | 0,990094 | 0,032722 | 0,593 | 0,62  | 1 |
| Hirip3    | 0,990205 | 0,028518 | 0,178 | 0,184 | 1 |
| Rhoc      | 0,990276 | 0,029605 | 0,435 | 0,46  | 1 |
| Gm7694    | 0,990379 | 0,000803 | 0,028 | 0,027 | 1 |
| Rpusd4    | 0,990518 | 0,003913 | 0,075 | 0,076 | 1 |
| Neu3      | 0,990613 | -0,00036 | 0,015 | 0,015 | 1 |
| Hs1bp3    | 0,990691 | 0,022208 | 0,235 | 0,238 | 1 |
| Pask      | 0,991021 | -8,8E-05 | 0,015 | 0,015 | 1 |
| Ptprg     | 0,991021 | -8,8E-05 | 0,015 | 0,015 | 1 |
| 5033403FC | 0,991021 | -8,8E-05 | 0,015 | 0,015 | 1 |
| Fermt2    | 0,991143 | 0,01188  | 0,958 | 0,973 | 1 |
| Desi2     | 0,991363 | 0,029362 | 0,277 | 0,287 | 1 |
| Ctbp1     | 0,991397 | 0,011353 | 0,848 | 0,854 | 1 |
| Aars      | 0,991445 | 0,067278 | 0,525 | 0,58  | 1 |
| Map3k12   | 0,991548 | 0,013824 | 0,163 | 0,167 | 1 |
| Slc22a5   | 0,991897 | 0,013808 | 0,169 | 0,171 | 1 |
| Kdm2b     | 0,992363 | 0,015531 | 0,211 | 0,217 | 1 |
| Pecam1    | 0,992391 | 0,011652 | 0,031 | 0,032 | 1 |
| Rps3      | 0,992489 | 0,026373 | 0,998 | 0,994 | 1 |
| 4931406P: | 0,992576 | 0,026951 | 0,804 | 0,808 | 1 |
| Ivns1abp  | 0,993042 | 0,066216 | 0,439 | 0,475 | 1 |
| Pramef8   | 0,993248 | 0,004671 | 0,088 | 0,089 | 1 |
| Cep350    | 0,993866 | 0,05657  | 0,466 | 0,513 | 1 |
| Rab36     | 0,993878 | 0,001719 | 0,015 | 0,015 | 1 |
| 443040211 | 0,993878 | 0,001719 | 0,015 | 0,015 | 1 |
| AC165953. | 0,994473 | 0,033526 | 0,138 | 0,141 | 1 |
| Arhgap35  | 0,994847 | 0,051834 | 0,389 | 0,418 | 1 |
| Sec63     | 0,995982 | 0,013863 | 0,622 | 0,65  | 1 |
| Man2a1    | 0,9963   | 0,020472 | 0,061 | 0,061 | 1 |
| Vps37d    | 0,996379 | 0,001036 | 0,072 | 0,072 | 1 |
| Gm14703   | 0,996735 | 0,005323 | 0,015 | 0,015 | 1 |
| Npsr1     | 0,996735 | 0,006554 | 0,015 | 0,015 | 1 |
| Nlrx1     | 0,996954 | 0,011688 | 0,046 | 0,046 | 1 |
| Rftn1     | 0,997371 | 0,023389 | 0,675 | 0,679 | 1 |
| Olfr46    | 0,997383 | 0,0087   | 0,029 | 0,03  | 1 |
| Mapk7     | 0,998003 | 0,012838 | 0,189 | 0,192 | 1 |
| Mrpl37    | 0,998261 | 0,006944 | 0,16  | 0,16  | 1 |
| Palm      | 0,99869  | 0,027098 | 0,211 | 0,217 | 1 |
| Ap1g2     | 0,998804 | 0,005003 | 0,044 | 0,044 | 1 |
| Reck      | 0,998837 | 0,006653 | 0,029 | 0,03  | 1 |
| Gm42595   | 0,998837 | 0,006653 | 0,029 | 0,03  | 1 |
| Hid1      | 0,999034 | 0,055499 | 0,389 | 0,424 | 1 |
| Etfbkmt   | 0,999128 | 0,0087   | 0,029 | 0,03  | 1 |

|        |          |          |       |       |   |
|--------|----------|----------|-------|-------|---|
| Zfp78  | 0,999128 | 0,0087   | 0,029 | 0,03  | 1 |
| Sirt6  | 0,999285 | 0,010362 | 0,136 | 0,137 | 1 |
| Neil1  | 0,999391 | 0,00626  | 0,117 | 0,118 | 1 |
| Pou5f1 | 0,999592 | 0,007119 | 0,015 | 0,015 | 1 |
| Spata6 | 0,99968  | 0,014302 | 0,105 | 0,105 | 1 |
| Nr4a1  | 1        | 0,073319 | 0,127 | 0,131 | 1 |

|           | p_val    | avg_logFC | pct.1 | pct.2 | p_val_adj |
|-----------|----------|-----------|-------|-------|-----------|
| Xist      | 3,96E-41 | 0,9086    | 0,581 | 0,262 | 6,24E-37  |
| Gm8797    | 2,19E-33 | -0,31203  | 0,075 | 0,291 | 3,45E-29  |
| Ddx3y     | 1,3E-23  | -0,30596  | 0,333 | 0,589 | 2,05E-19  |
| Tsix      | 4,26E-21 | 0,264717  | 0,25  | 0,065 | 6,72E-17  |
| Gatm      | 1,69E-20 | -0,16709  | 0,999 | 1     | 2,67E-16  |
| Gstp1     | 1,44E-19 | 0,47719   | 0,984 | 0,937 | 2,27E-15  |
| Etv1      | 1,62E-19 | -0,27876  | 0,942 | 0,974 | 2,56E-15  |
| Dbnidd2   | 1,93E-18 | 0,228641  | 0,988 | 0,98  | 3,04E-14  |
| Klf13     | 2,29E-18 | 0,272809  | 0,992 | 0,989 | 3,61E-14  |
| Eif2s3y   | 9,97E-18 | -0,24439  | 0,274 | 0,491 | 1,57E-13  |
| Gm42205   | 4,72E-16 | -0,10287  | 0,014 | 0,101 | 7,44E-12  |
| Sparc     | 1,22E-14 | 0,318224  | 0,844 | 0,732 | 1,92E-10  |
| Pex5l     | 4,08E-14 | -0,2879   | 0,968 | 0,985 | 6,43E-10  |
| Sept7     | 7,22E-13 | -0,17487  | 0,998 | 1     | 1,14E-08  |
| Gjc3      | 2,6E-12  | -0,1897   | 0,987 | 0,997 | 4,11E-08  |
| Ubc       | 4,21E-12 | 0,24384   | 0,998 | 0,998 | 6,64E-08  |
| Hdac11    | 6,69E-12 | 0,226236  | 0,892 | 0,841 | 1,06E-07  |
| Mt1       | 7,08E-12 | 0,417837  | 0,932 | 0,885 | 1,12E-07  |
| Hsph1     | 8,63E-12 | -0,17232  | 0,536 | 0,714 | 1,36E-07  |
| Trim16    | 1,01E-11 | 0,103517  | 0,09  | 0,008 | 1,59E-07  |
| Slc44a1   | 1,37E-11 | 0,147228  | 0,999 | 1     | 2,16E-07  |
| Hnrnpa0   | 1,57E-11 | 0,194824  | 0,869 | 0,802 | 2,48E-07  |
| Per1      | 3,84E-11 | 0,33121   | 0,34  | 0,197 | 6,06E-07  |
| 4933431E2 | 5,68E-11 | -0,21362  | 0,633 | 0,732 | 8,97E-07  |
| Uba52     | 1,51E-10 | 0,206528  | 0,764 | 0,662 | 2,39E-06  |
| mt-Cytb   | 2,24E-10 | -0,12875  | 0,999 | 1     | 3,53E-06  |
| Hist2h2ac | 2,52E-10 | -0,05685  | 0,009 | 0,063 | 3,98E-06  |
| Uty       | 2,65E-10 | -0,12463  | 0,138 | 0,265 | 4,19E-06  |
| Egr1      | 3,34E-10 | 1,120079  | 0,345 | 0,211 | 5,27E-06  |
| Eml1      | 3,42E-10 | -0,2076   | 0,677 | 0,777 | 5,39E-06  |
| 6330403K0 | 3,6E-10  | -0,10851  | 0,026 | 0,098 | 5,68E-06  |
| Gng11     | 4E-10    | -0,16147  | 0,966 | 0,982 | 6,3E-06   |
| Eif3j2    | 4,34E-10 | 0,1953    | 0,233 | 0,114 | 6,84E-06  |
| Kdm5d     | 5,08E-10 | -0,13081  | 0,11  | 0,223 | 8,02E-06  |
| Npsr1     | 5,39E-10 | -0,08985  | 0,015 | 0,075 | 8,51E-06  |
| Atf3      | 5,93E-10 | 0,442802  | 0,146 | 0,049 | 9,36E-06  |
| Hspa8     | 1,03E-09 | -0,11115  | 0,999 | 1     | 1,62E-05  |
| Gpc1      | 1,04E-09 | 0,254758  | 0,599 | 0,472 | 1,65E-05  |
| Nacc2     | 1,15E-09 | -0,18432  | 0,859 | 0,894 | 1,81E-05  |
| mt-Atp6   | 1,59E-09 | -0,1081   | 1     | 1     | 2,5E-05   |
| Gpm6b     | 2,36E-09 | -0,11356  | 1     | 1     | 3,73E-05  |
| Cd63      | 2,36E-09 | 0,203117  | 0,933 | 0,917 | 3,73E-05  |
| Atg4c     | 3,24E-09 | -0,13841  | 0,427 | 0,577 | 5,11E-05  |
| Usp31     | 3,64E-09 | -0,20712  | 0,816 | 0,881 | 5,75E-05  |
| Adgrl3    | 3,98E-09 | -0,13934  | 0,194 | 0,325 | 6,27E-05  |
| Gria2     | 4,04E-09 | -0,11577  | 0,015 | 0,07  | 6,37E-05  |
| D1Ertd622 | 4,35E-09 | 0,193819  | 0,912 | 0,849 | 6,87E-05  |
| Ugt8a     | 4,4E-09  | -0,13614  | 0,998 | 0,998 | 6,93E-05  |
| Srsf5     | 4,99E-09 | 0,156073  | 0,974 | 0,945 | 7,87E-05  |
| Efcab14   | 6,87E-09 | -0,20029  | 0,982 | 0,992 | 0,000108  |
| Aldoc     | 7,11E-09 | -0,21478  | 0,276 | 0,42  | 0,000112  |

|           |          |          |       |       |          |
|-----------|----------|----------|-------|-------|----------|
| Hip1      | 7,87E-09 | -0,13922 | 0,673 | 0,803 | 0,000124 |
| Psmb8     | 1,28E-08 | -0,57364 | 0,02  | 0,076 | 0,000202 |
| Mt2       | 1,31E-08 | 0,384088 | 0,271 | 0,159 | 0,000207 |
| Junb      | 1,36E-08 | 0,521429 | 0,472 | 0,341 | 0,000215 |
| Jam3      | 1,71E-08 | -0,12933 | 0,958 | 0,982 | 0,00027  |
| Hebp1     | 1,99E-08 | 0,217028 | 0,711 | 0,598 | 0,000314 |
| Fam171b   | 2,14E-08 | -0,1386  | 0,954 | 0,964 | 0,000337 |
| Mbp       | 2,2E-08  | 0,105938 | 0,999 | 1     | 0,000347 |
| Cd274     | 2,33E-08 | -0,39329 | 0,018 | 0,072 | 0,000368 |
| Scd2      | 2,6E-08  | -0,13746 | 0,999 | 1     | 0,00041  |
| Psat1     | 3E-08    | -0,13811 | 0,966 | 0,987 | 0,000474 |
| Spock3    | 4,25E-08 | -0,19256 | 0,843 | 0,889 | 0,00067  |
| Crim1     | 5,47E-08 | -0,16133 | 0,342 | 0,47  | 0,000863 |
| Scnm1     | 6,34E-08 | 0,153434 | 0,539 | 0,421 | 0,001    |
| mt-Nd4    | 6,71E-08 | -0,10873 | 0,999 | 1     | 0,001058 |
| Jund      | 6,98E-08 | 0,171548 | 0,999 | 0,998 | 0,001101 |
| S100a16   | 7,13E-08 | -0,15009 | 0,969 | 0,992 | 0,001125 |
| Rab4a     | 7,2E-08  | -0,16394 | 0,467 | 0,597 | 0,001136 |
| AC149090. | 8,36E-08 | -0,14902 | 0,772 | 0,857 | 0,001318 |
| Gm43241   | 8,8E-08  | -0,03632 | 0,002 | 0,034 | 0,001389 |
| Ldhb      | 1,05E-07 | -0,20043 | 0,634 | 0,746 | 0,001657 |
| Oxr1      | 1,1E-07  | -0,16562 | 0,731 | 0,811 | 0,001728 |
| Spred1    | 1,15E-07 | -0,15936 | 0,749 | 0,816 | 0,001812 |
| Abca8a    | 1,43E-07 | -0,23451 | 0,247 | 0,354 | 0,002263 |
| Lrrn3     | 1,47E-07 | -0,09539 | 0,071 | 0,151 | 0,002315 |
| Slc25a29  | 1,57E-07 | -0,09949 | 0,183 | 0,296 | 0,002475 |
| Slc6a9    | 1,62E-07 | -0,14098 | 0,883 | 0,935 | 0,002555 |
| Mbnl2     | 1,79E-07 | -0,09478 | 0,999 | 1     | 0,002821 |
| Dixdc1    | 1,81E-07 | -0,13447 | 0,919 | 0,969 | 0,002851 |
| Tmeff1    | 1,97E-07 | -0,11962 | 0,92  | 0,969 | 0,003101 |
| Gpx4      | 2,06E-07 | 0,112104 | 0,999 | 1     | 0,003255 |
| Kcnj10    | 2,24E-07 | -0,15975 | 0,976 | 0,99  | 0,00353  |
| H3f3b     | 2,46E-07 | 0,154566 | 0,998 | 0,993 | 0,00388  |
| Ahcy11    | 2,54E-07 | -0,12953 | 0,811 | 0,872 | 0,004006 |
| Ogdhl     | 2,66E-07 | -0,19962 | 0,205 | 0,317 | 0,004199 |
| Sppl2b    | 2,73E-07 | -0,13325 | 0,28  | 0,398 | 0,004307 |
| Inpp5f    | 2,77E-07 | -0,13463 | 0,882 | 0,927 | 0,004373 |
| Fgfr2     | 3,24E-07 | -0,13153 | 0,97  | 0,982 | 0,005109 |
| Hbb-bs    | 3,42E-07 | 2,147944 | 0,041 | 0     | 0,005395 |
| Gstm7     | 4,27E-07 | -0,14471 | 0,877 | 0,925 | 0,00674  |
| Ctsk      | 4,36E-07 | -0,13744 | 0,368 | 0,486 | 0,006874 |
| March1    | 4,51E-07 | -0,13825 | 0,31  | 0,431 | 0,007108 |
| Rasal2    | 4,91E-07 | -0,154   | 0,494 | 0,589 | 0,007743 |
| Dbt       | 6,04E-07 | -0,15055 | 0,33  | 0,439 | 0,009527 |
| Asah2     | 6,6E-07  | -0,12625 | 0,195 | 0,299 | 0,010414 |
| Hhat1     | 6,93E-07 | 0,204129 | 0,486 | 0,385 | 0,01093  |
| Gm47283   | 6,96E-07 | 0,147226 | 0,714 | 0,626 | 0,010979 |
| Pcdh15    | 7,44E-07 | -0,11313 | 0,09  | 0,171 | 0,011737 |
| Slu7      | 7,56E-07 | -0,16104 | 0,791 | 0,878 | 0,011921 |
| Pou3f1    | 7,65E-07 | 0,189624 | 0,743 | 0,688 | 0,012068 |
| Tap2      | 8,3E-07  | -0,21447 | 0,032 | 0,088 | 0,013094 |
| 1110038F1 | 8,44E-07 | -0,11352 | 0,408 | 0,537 | 0,013313 |

|           |          |          |       |       |          |
|-----------|----------|----------|-------|-------|----------|
| Ncam2     | 9,37E-07 | -0,13595 | 0,688 | 0,789 | 0,014786 |
| Crtac1    | 9,75E-07 | 0,15753  | 0,328 | 0,215 | 0,015376 |
| Mapk8ip1  | 9,78E-07 | 0,109853 | 0,999 | 1     | 0,015435 |
| Sgta      | 1,03E-06 | -0,11805 | 0,888 | 0,928 | 0,016277 |
| mt-Co2    | 1,08E-06 | -0,09086 | 1     | 1     | 0,017051 |
| Slc12a2   | 1,25E-06 | -0,11344 | 0,998 | 1     | 0,01968  |
| Dclk1     | 1,35E-06 | -0,13537 | 0,181 | 0,281 | 0,021339 |
| Cdh19     | 1,47E-06 | -0,12518 | 0,37  | 0,494 | 0,023198 |
| Il1rap    | 1,62E-06 | -0,1149  | 0,871 | 0,928 | 0,025501 |
| Zfp445    | 1,65E-06 | -0,13745 | 0,668 | 0,758 | 0,025983 |
| Clic5     | 1,73E-06 | -0,10625 | 0,101 | 0,182 | 0,027242 |
| Tac1      | 1,82E-06 | -0,033   | 0,007 | 0,041 | 0,028679 |
| Asrgl1    | 1,82E-06 | -0,13599 | 0,687 | 0,772 | 0,028772 |
| Elovl5    | 1,83E-06 | -0,15307 | 0,776 | 0,842 | 0,028864 |
| Parp14    | 2,17E-06 | -0,08783 | 0,005 | 0,036 | 0,0342   |
| mt-Co3    | 2,21E-06 | -0,08895 | 1     | 1     | 0,034875 |
| Prex1     | 2,36E-06 | -0,14406 | 0,492 | 0,593 | 0,037292 |
| Ier2      | 2,38E-06 | 0,43814  | 0,19  | 0,107 | 0,037571 |
| Kcnk13    | 2,39E-06 | -0,11336 | 0,725 | 0,816 | 0,037736 |
| Psmb9     | 2,46E-06 | -0,21187 | 0,015 | 0,055 | 0,038856 |
| Car2      | 2,61E-06 | -0,11559 | 1     | 1     | 0,041222 |
| Qdpr      | 2,69E-06 | -0,17116 | 0,99  | 0,992 | 0,042484 |
| Trim2     | 2,73E-06 | -0,12373 | 0,974 | 0,985 | 0,043009 |
| Dock9     | 2,76E-06 | -0,15965 | 0,763 | 0,824 | 0,043512 |
| Dock5     | 2,91E-06 | -0,13067 | 0,562 | 0,66  | 0,045949 |
| Kif21a    | 2,93E-06 | -0,11412 | 0,954 | 0,963 | 0,046229 |
| Garem2    | 2,93E-06 | -0,11949 | 0,115 | 0,197 | 0,046238 |
| Bloc1s1   | 3,16E-06 | 0,156495 | 0,696 | 0,629 | 0,049917 |
| Acap2     | 3,46E-06 | -0,11219 | 0,806 | 0,878 | 0,054539 |
| Cpox      | 3,55E-06 | -0,18152 | 0,974 | 0,979 | 0,056031 |
| 9330159F1 | 3,65E-06 | -0,1146  | 0,389 | 0,514 | 0,057513 |
| Pcdh9     | 4,18E-06 | -0,11753 | 0,995 | 0,998 | 0,065957 |
| Adgrb3    | 4,61E-06 | -0,11373 | 0,134 | 0,221 | 0,072762 |
| Gm11808   | 4,7E-06  | 0,140947 | 0,616 | 0,52  | 0,07413  |
| Tacc1     | 4,83E-06 | -0,12696 | 0,644 | 0,741 | 0,076145 |
| Adam19    | 5,41E-06 | -0,12692 | 0,324 | 0,433 | 0,085284 |
| Abcc5     | 5,62E-06 | -0,12137 | 0,738 | 0,839 | 0,088688 |
| Aif1l     | 5,7E-06  | -0,11915 | 0,426 | 0,538 | 0,089988 |
| Hhip      | 5,75E-06 | -0,15552 | 0,581 | 0,66  | 0,090719 |
| Gatsl2    | 5,85E-06 | -0,09531 | 0,225 | 0,328 | 0,092334 |
| Ybx3      | 6E-06    | -0,11176 | 0,837 | 0,912 | 0,094724 |
| Scg2      | 6,01E-06 | -0,03728 | 0,009 | 0,042 | 0,094771 |
| Dnm3      | 6,07E-06 | -0,13421 | 0,961 | 0,974 | 0,095702 |
| Tbc1d5    | 6,67E-06 | -0,12662 | 0,627 | 0,72  | 0,105289 |
| Ccdc91    | 6,68E-06 | -0,10711 | 0,228 | 0,327 | 0,105414 |
| Pak1      | 6,71E-06 | 0,117575 | 0,976 | 0,974 | 0,105807 |
| Sil1      | 6,79E-06 | -0,12409 | 0,361 | 0,465 | 0,107184 |
| Atp9a     | 6,83E-06 | -0,11444 | 0,901 | 0,932 | 0,107768 |
| Lgr4      | 7,13E-06 | -0,08467 | 0,163 | 0,255 | 0,112413 |
| Lyz2      | 7,33E-06 | 0,091761 | 0,157 | 0,081 | 0,115712 |
| Megf10    | 7,96E-06 | -0,13671 | 0,592 | 0,673 | 0,125534 |
| Lats2     | 7,97E-06 | -0,11002 | 0,258 | 0,361 | 0,12581  |



|           |          |          |       |       |          |
|-----------|----------|----------|-------|-------|----------|
| Adam10    | 8,15E-06 | -0,10054 | 0,795 | 0,868 | 0,128509 |
| Cdc42ep1  | 8,69E-06 | -0,10725 | 0,728 | 0,816 | 0,13703  |
| Pak7      | 8,85E-06 | -0,14507 | 0,629 | 0,714 | 0,139662 |
| Npepps    | 8,95E-06 | -0,11041 | 0,868 | 0,885 | 0,141178 |
| Lrrc1     | 9,3E-06  | -0,12107 | 0,462 | 0,572 | 0,146717 |
| Fam234a   | 9,75E-06 | -0,11046 | 0,453 | 0,576 | 0,153843 |
| Gm15446   | 9,93E-06 | -0,06824 | 0,073 | 0,14  | 0,156714 |
| Notch1    | 1E-05    | 0,07863  | 0,077 | 0,024 | 0,158046 |
| Ndrp2     | 1,02E-05 | -0,15497 | 0,264 | 0,363 | 0,160179 |
| Pgbd5     | 1,03E-05 | -0,10923 | 0,342 | 0,45  | 0,163248 |
| St3gal4   | 1,04E-05 | 0,131684 | 0,789 | 0,707 | 0,164109 |
| Ubfd1     | 1,05E-05 | -0,08354 | 0,15  | 0,237 | 0,16544  |
| Add3      | 1,1E-05  | -0,14883 | 0,835 | 0,88  | 0,173588 |
| Sik3      | 1,1E-05  | 0,130403 | 0,911 | 0,881 | 0,174043 |
| Glrp      | 1,12E-05 | -0,14366 | 0,636 | 0,696 | 0,177127 |
| Bcat1     | 1,14E-05 | -0,13811 | 0,347 | 0,452 | 0,180098 |
| Armt1     | 1,17E-05 | -0,08214 | 0,137 | 0,221 | 0,185264 |
| Hmgcs1    | 1,2E-05  | 0,373447 | 0,937 | 0,951 | 0,189424 |
| Dab1      | 1,24E-05 | -0,0714  | 0,051 | 0,109 | 0,195144 |
| Cldn11    | 1,24E-05 | 0,085305 | 0,999 | 1     | 0,195492 |
| Prkca     | 1,38E-05 | -0,12428 | 0,69  | 0,774 | 0,218254 |
| Gpd2      | 1,43E-05 | -0,16838 | 0,497 | 0,576 | 0,224809 |
| Myo6      | 1,46E-05 | -0,09102 | 0,985 | 0,995 | 0,229882 |
| Rpl10-ps3 | 1,46E-05 | 0,091566 | 0,239 | 0,15  | 0,231101 |
| Npas3     | 1,5E-05  | -0,11172 | 0,226 | 0,32  | 0,236085 |
| Pigc      | 1,5E-05  | -0,0791  | 0,165 | 0,254 | 0,236323 |
| Cln3      | 1,53E-05 | 0,153037 | 0,725 | 0,66  | 0,241992 |
| Csmd3     | 1,66E-05 | -0,12079 | 0,447 | 0,538 | 0,262019 |
| Slc24a4   | 1,75E-05 | 0,04908  | 0,033 | 0,002 | 0,276837 |
| Dclk3     | 1,77E-05 | -0,06432 | 0,081 | 0,15  | 0,279863 |
| Gng12     | 1,84E-05 | -0,09312 | 0,818 | 0,888 | 0,290549 |
| Klhl4     | 1,87E-05 | -0,14221 | 0,674 | 0,735 | 0,294918 |
| Dnah14    | 1,94E-05 | -0,08534 | 0,231 | 0,333 | 0,306639 |
| Eif3j1    | 1,96E-05 | -0,09381 | 0,764 | 0,847 | 0,309605 |
| Kat2b     | 1,96E-05 | -0,1311  | 0,745 | 0,821 | 0,309656 |
| Glo1      | 2,04E-05 | -0,14313 | 0,844 | 0,865 | 0,322486 |
| Wasf3     | 2,1E-05  | -0,09712 | 0,184 | 0,273 | 0,330854 |
| Cd82      | 2,13E-05 | 0,125372 | 0,974 | 0,976 | 0,335845 |
| Sqle      | 2,15E-05 | 0,243762 | 0,663 | 0,602 | 0,339121 |
| Cab39l    | 2,16E-05 | -0,11704 | 0,278 | 0,377 | 0,340927 |
| Atxn7l3b  | 2,18E-05 | -0,08919 | 0,978 | 0,99  | 0,34374  |
| Fam168a   | 2,3E-05  | -0,12678 | 0,97  | 0,979 | 0,363602 |
| Tmsb10    | 2,4E-05  | 0,165712 | 0,614 | 0,533 | 0,378795 |
| Bin1      | 2,46E-05 | -0,1052  | 0,997 | 0,997 | 0,38863  |
| Sall1     | 2,54E-05 | -0,11433 | 0,409 | 0,52  | 0,400606 |
| Igsf11    | 2,58E-05 | -0,12694 | 0,687 | 0,772 | 0,407485 |
| Rpsa      | 2,64E-05 | 0,115988 | 0,999 | 1     | 0,41647  |
| Sat2      | 2,65E-05 | -0,09845 | 0,303 | 0,407 | 0,417968 |
| Sema3c    | 2,68E-05 | -0,03534 | 0,009 | 0,039 | 0,422084 |
| Osbpl7    | 2,69E-05 | -0,13417 | 0,395 | 0,475 | 0,424546 |
| Fhdc1     | 2,72E-05 | -0,07823 | 0,145 | 0,229 | 0,42858  |
| Erbp4     | 2,75E-05 | -0,11786 | 0,295 | 0,398 | 0,433102 |

|          |          |          |       |       |          |
|----------|----------|----------|-------|-------|----------|
| Cdc3711  | 2,76E-05 | -0,09747 | 0,997 | 0,998 | 0,434774 |
| Btc      | 2,8E-05  | -0,06964 | 0,124 | 0,202 | 0,441548 |
| Nbas     | 2,99E-05 | 0,172281 | 0,724 | 0,68  | 0,471668 |
| Itgav    | 3,04E-05 | -0,15064 | 0,784 | 0,818 | 0,479011 |
| Cdk5rap2 | 3,12E-05 | -0,11059 | 0,603 | 0,691 | 0,492277 |
| Eps15    | 3,18E-05 | -0,12335 | 0,871 | 0,907 | 0,501586 |
| Synpo    | 3,19E-05 | 0,102056 | 0,229 | 0,146 | 0,503121 |
| Paip1    | 3,26E-05 | -0,08593 | 0,698 | 0,772 | 0,514846 |
| Gbp7     | 3,38E-05 | -0,39229 | 0,05  | 0,102 | 0,53379  |
| Frmd4a   | 3,39E-05 | -0,09351 | 0,379 | 0,483 | 0,535182 |
| Slc38a2  | 3,49E-05 | -0,10414 | 0,973 | 0,992 | 0,550228 |
| Fos      | 3,49E-05 | 0,652335 | 0,671 | 0,593 | 0,551219 |
| Tmem229a | 3,53E-05 | -0,12366 | 0,915 | 0,928 | 0,557293 |
| Tagln2   | 3,59E-05 | 0,177301 | 0,289 | 0,198 | 0,566663 |
| Elavl3   | 3,61E-05 | -0,09937 | 0,998 | 1     | 0,569351 |
| Robo1    | 3,65E-05 | -0,11497 | 0,303 | 0,403 | 0,575891 |
| Gstm1    | 3,75E-05 | -0,10452 | 0,649 | 0,735 | 0,591003 |
| Galnt7   | 3,77E-05 | -0,13207 | 0,557 | 0,636 | 0,593994 |
| Arhgap5  | 3,79E-05 | -0,108   | 0,947 | 0,943 | 0,598532 |
| Omg      | 3,84E-05 | -0,12211 | 0,759 | 0,813 | 0,606271 |
| Serpind1 | 3,89E-05 | -0,16424 | 0,209 | 0,293 | 0,61334  |
| Snca     | 4,06E-05 | -0,08103 | 0,165 | 0,249 | 0,640976 |
| Micall1  | 4,12E-05 | 0,121042 | 0,978 | 0,972 | 0,649534 |
| Amph     | 4,26E-05 | -0,08377 | 0,346 | 0,45  | 0,671279 |
| Isoc2b   | 4,26E-05 | -0,04194 | 0,031 | 0,076 | 0,671625 |
| Sst      | 4,45E-05 | -0,03766 | 0,015 | 0,049 | 0,701347 |
| Picalm   | 4,6E-05  | -0,11116 | 0,944 | 0,974 | 0,725898 |
| Nap1l3   | 4,66E-05 | -0,10793 | 0,163 | 0,244 | 0,735881 |
| Bcas1    | 4,85E-05 | 0,204535 | 0,973 | 0,969 | 0,76475  |
| Cmpk2    | 5,09E-05 | -0,06248 | 0,009 | 0,037 | 0,802267 |
| Slc12a4  | 5,29E-05 | -0,06034 | 0,115 | 0,189 | 0,834347 |
| Tapbp1   | 5,5E-05  | -0,12712 | 0,044 | 0,093 | 0,868035 |
| Epb41l3  | 5,51E-05 | -0,10021 | 0,946 | 0,984 | 0,86906  |
| Kif5a    | 5,56E-05 | 0,131177 | 0,317 | 0,228 | 0,877592 |
| Sqor     | 5,58E-05 | -0,06424 | 0,066 | 0,124 | 0,880585 |
| Ogt      | 5,67E-05 | -0,09855 | 0,825 | 0,876 | 0,894901 |
| Tmem56   | 5,78E-05 | -0,09707 | 0,172 | 0,252 | 0,912416 |
| Jakmip2  | 5,8E-05  | -0,09663 | 0,277 | 0,371 | 0,915696 |
| Dpy19l1  | 5,93E-05 | -0,09198 | 0,996 | 1     | 0,935067 |
| Fbxo44   | 5,97E-05 | -0,10457 | 0,366 | 0,468 | 0,94173  |
| Parp12   | 5,97E-05 | -0,10603 | 0,102 | 0,167 | 0,942134 |
| Gm43796  | 6,18E-05 | 0,061314 | 0,096 | 0,042 | 0,974862 |
| Rhob     | 6,36E-05 | 0,097298 | 0,999 | 1     | 1        |
| Gm43242  | 6,46E-05 | -0,07903 | 0,132 | 0,207 | 1        |
| Dusp15   | 6,59E-05 | -0,11992 | 0,572 | 0,646 | 1        |
| 4931406C | 6,6E-05  | -0,11997 | 0,409 | 0,494 | 1        |
| Hcn2     | 6,63E-05 | -0,15382 | 0,901 | 0,925 | 1        |
| Fbn2     | 6,65E-05 | -0,05997 | 0,03  | 0,073 | 1        |
| Rnf44    | 6,71E-05 | -0,10162 | 0,4   | 0,502 | 1        |
| Gbp3     | 6,8E-05  | -0,2077  | 0,021 | 0,057 | 1        |
| Mrpl48   | 6,81E-05 | -0,0959  | 0,811 | 0,863 | 1        |
| Nav3     | 6,81E-05 | -0,10839 | 0,14  | 0,215 | 1        |

|          |          |          |       |       |   |
|----------|----------|----------|-------|-------|---|
| Ifit3    | 7,16E-05 | -0,22668 | 0,012 | 0,042 | 1 |
| Bbx      | 7,27E-05 | -0,11053 | 0,57  | 0,657 | 1 |
| S100a10  | 7,28E-05 | 0,134048 | 0,17  | 0,099 | 1 |
| Cd9      | 7,32E-05 | 0,180962 | 0,911 | 0,867 | 1 |
| Plp1     | 7,37E-05 | -0,06333 | 0,999 | 1     | 1 |
| Tubb4a   | 7,54E-05 | -0,10228 | 0,999 | 0,998 | 1 |
| Cyp2j6   | 7,56E-05 | -0,12726 | 0,29  | 0,38  | 1 |
| Erap1    | 7,63E-05 | -0,0703  | 0,066 | 0,122 | 1 |
| Gadd45g  | 7,75E-05 | 0,424726 | 0,148 | 0,085 | 1 |
| Zrsr1    | 7,81E-05 | -0,12817 | 0,387 | 0,483 | 1 |
| Ube2l6   | 7,81E-05 | -0,03362 | 0,013 | 0,044 | 1 |
| Gm42418  | 7,84E-05 | -0,03043 | 1     | 1     | 1 |
| Pkp4     | 8,03E-05 | 0,153267 | 0,836 | 0,782 | 1 |
| Egr2     | 8,1E-05  | 0,378782 | 0,16  | 0,094 | 1 |
| Acot11   | 8,18E-05 | 0,087637 | 0,141 | 0,078 | 1 |
| H2-M3    | 8,35E-05 | -0,03456 | 0,002 | 0,021 | 1 |
| Lhfp12   | 8,43E-05 | -0,08992 | 0,132 | 0,203 | 1 |
| Ptch1    | 8,54E-05 | -0,09338 | 0,44  | 0,54  | 1 |
| Tmem87a  | 8,56E-05 | 0,116497 | 0,403 | 0,319 | 1 |
| Ndufa8   | 8,92E-05 | -0,09411 | 0,709 | 0,802 | 1 |
| Egr3     | 9,35E-05 | 0,125624 | 0,077 | 0,029 | 1 |
| Tvp23a   | 9,43E-05 | -0,08437 | 0,101 | 0,166 | 1 |
| Hspa2    | 9,68E-05 | 0,139894 | 0,427 | 0,345 | 1 |
| Slc25a12 | 9,83E-05 | -0,08467 | 0,393 | 0,507 | 1 |
| C4b      | 0,0001   | 0,159813 | 0,85  | 0,802 | 1 |
| Ddr1     | 0,000103 | 0,112262 | 0,987 | 0,984 | 1 |
| Lrp1b    | 0,000104 | -0,10039 | 0,917 | 0,938 | 1 |
| Oasl2    | 0,000104 | -0,09123 | 0,009 | 0,036 | 1 |
| Cdc14a   | 0,000105 | -0,07109 | 0,154 | 0,233 | 1 |
| Abat     | 0,000106 | -0,0785  | 0,238 | 0,332 | 1 |
| Macf1    | 0,000109 | -0,13017 | 0,766 | 0,831 | 1 |
| Tcaim    | 0,00011  | -0,0851  | 0,219 | 0,304 | 1 |
| Kif5b    | 0,000116 | 0,132369 | 0,921 | 0,894 | 1 |
| Pptc7    | 0,000117 | -0,0869  | 0,206 | 0,288 | 1 |
| Cotl1    | 0,000118 | -0,08877 | 0,206 | 0,293 | 1 |
| Fbln2    | 0,000118 | 0,103502 | 0,123 | 0,065 | 1 |
| Plcl1    | 0,000118 | -0,09988 | 0,96  | 0,959 | 1 |
| Tap1     | 0,000122 | -0,27292 | 0,031 | 0,072 | 1 |
| Sox4     | 0,000122 | 0,23664  | 0,131 | 0,072 | 1 |
| Rpl13a   | 0,000122 | 0,137566 | 0,934 | 0,911 | 1 |
| Folh1    | 0,000126 | -0,12589 | 0,398 | 0,488 | 1 |
| Aspa     | 0,000131 | -0,09169 | 0,983 | 0,997 | 1 |
| Ptms     | 0,000135 | 0,156858 | 0,831 | 0,779 | 1 |
| Metrn    | 0,000136 | -0,08589 | 0,761 | 0,824 | 1 |
| Opcml    | 0,000137 | -0,0878  | 0,152 | 0,224 | 1 |
| Zfp536   | 0,00014  | 0,120715 | 0,935 | 0,906 | 1 |
| Igsf8    | 0,000154 | 0,141041 | 0,741 | 0,691 | 1 |
| Map4k5   | 0,000155 | -0,09843 | 0,674 | 0,746 | 1 |
| Itgb8    | 0,000155 | -0,1091  | 0,754 | 0,803 | 1 |
| Calm1    | 0,000157 | -0,07454 | 0,998 | 1     | 1 |
| Kif1b    | 0,00016  | -0,0792  | 0,999 | 1     | 1 |
| Ccdc32   | 0,000164 | -0,08564 | 0,274 | 0,361 | 1 |

|           |          |          |       |       |   |
|-----------|----------|----------|-------|-------|---|
| Anxa2     | 0,000166 | 0,142626 | 0,342 | 0,257 | 1 |
| Slc36a4   | 0,00017  | -0,08095 | 0,207 | 0,286 | 1 |
| Mtus1     | 0,000172 | -0,11218 | 0,798 | 0,849 | 1 |
| Erbin     | 0,000173 | 0,118729 | 0,964 | 0,953 | 1 |
| Rap2a     | 0,000173 | -0,1065  | 0,445 | 0,528 | 1 |
| Nap115    | 0,000173 | -0,1096  | 0,843 | 0,894 | 1 |
| Tmem140   | 0,000174 | -0,11115 | 0,028 | 0,067 | 1 |
| Ece1      | 0,000178 | -0,05689 | 0,053 | 0,102 | 1 |
| Ppp4r3b   | 0,000178 | -0,08662 | 0,519 | 0,615 | 1 |
| Paics     | 0,000178 | -0,08432 | 0,846 | 0,875 | 1 |
| Chdh      | 0,000179 | -0,08268 | 0,237 | 0,322 | 1 |
| Tmem88b   | 0,000179 | -0,0687  | 0,999 | 1     | 1 |
| March8    | 0,000182 | -0,07684 | 0,875 | 0,904 | 1 |
| Tmod2     | 0,000184 | -0,14944 | 0,81  | 0,803 | 1 |
| Padi2     | 0,000186 | 0,083239 | 0,873 | 0,759 | 1 |
| Parp10    | 0,000186 | -0,04233 | 0,004 | 0,024 | 1 |
| Cd59a     | 0,000187 | 0,105802 | 0,479 | 0,379 | 1 |
| Zfp952    | 0,000187 | -0,08133 | 0,13  | 0,197 | 1 |
| Spata13   | 0,000192 | -0,07346 | 0,132 | 0,202 | 1 |
| Plekhf1   | 0,000194 | 0,106634 | 0,32  | 0,241 | 1 |
| Fam222a   | 0,000194 | 0,114084 | 0,574 | 0,506 | 1 |
| Rpl27-ps3 | 0,000199 | -0,06233 | 0,095 | 0,156 | 1 |
| Vwa1      | 0,000199 | 0,156252 | 0,31  | 0,231 | 1 |
| Afap1     | 0,000202 | 0,120681 | 0,49  | 0,407 | 1 |
| Rnf103    | 0,000204 | -0,10113 | 0,359 | 0,444 | 1 |
| Fosb      | 0,000205 | 0,4628   | 0,242 | 0,167 | 1 |
| Ernm      | 0,000207 | -0,06781 | 0,999 | 1     | 1 |
| Socs3     | 0,000211 | 0,25106  | 0,287 | 0,21  | 1 |
| Ano10     | 0,000216 | -0,07992 | 0,406 | 0,501 | 1 |
| Tnfsf9    | 0,000222 | 0,101739 | 0,105 | 0,054 | 1 |
| Rgmb      | 0,000222 | -0,09534 | 0,32  | 0,411 | 1 |
| Zmiz1     | 0,000223 | 0,124272 | 0,608 | 0,525 | 1 |
| Eef1akmt2 | 0,000224 | -0,08198 | 0,256 | 0,343 | 1 |
| Hepacam   | 0,000231 | -0,10217 | 0,948 | 0,943 | 1 |
| Col6a2    | 0,000234 | 0,154477 | 0,139 | 0,081 | 1 |
| Hnrnpdl   | 0,000235 | 0,104836 | 0,962 | 0,938 | 1 |
| Glul      | 0,000238 | -0,13292 | 0,998 | 0,998 | 1 |
| Ccdc88a   | 0,000242 | -0,09686 | 0,976 | 0,987 | 1 |
| P2rx4     | 0,000243 | -0,08841 | 0,397 | 0,489 | 1 |
| Ankub1    | 0,000246 | -0,1532  | 0,356 | 0,426 | 1 |
| Penk      | 0,000255 | -0,01515 | 0,001 | 0,016 | 1 |
| Mpzl1     | 0,000256 | -0,06712 | 0,702 | 0,784 | 1 |
| Ahnak     | 0,000263 | 0,081053 | 0,038 | 0,008 | 1 |
| Gstm5     | 0,000266 | -0,10774 | 0,948 | 0,95  | 1 |
| Btg2      | 0,000275 | 0,429354 | 0,307 | 0,233 | 1 |
| Evi2a     | 0,00028  | -0,08204 | 0,978 | 0,992 | 1 |
| Hspe1     | 0,00028  | -0,0981  | 0,889 | 0,927 | 1 |
| Pcdhb7    | 0,000281 | -0,04082 | 0,024 | 0,059 | 1 |
| Ncam1     | 0,000284 | 0,099461 | 0,999 | 1     | 1 |
| Ctnnbip1  | 0,000284 | -0,09724 | 0,73  | 0,772 | 1 |
| Rida      | 0,000287 | -0,09739 | 0,468 | 0,554 | 1 |
| Ddx60     | 0,000288 | -0,05519 | 0,006 | 0,028 | 1 |

|           |          |          |       |       |   |
|-----------|----------|----------|-------|-------|---|
| Msmo1     | 0,00029  | 0,23234  | 0,852 | 0,841 | 1 |
| Shb       | 0,000295 | 0,082524 | 0,231 | 0,158 | 1 |
| Psme1     | 0,000299 | -0,13508 | 0,161 | 0,229 | 1 |
| Tmprss5   | 0,0003   | -0,08559 | 0,309 | 0,398 | 1 |
| Cpd       | 0,000301 | -0,13146 | 0,971 | 0,976 | 1 |
| Kctd4     | 0,000303 | -0,11101 | 0,462 | 0,551 | 1 |
| Shc4      | 0,000304 | -0,04336 | 0,053 | 0,101 | 1 |
| Sh3bp2    | 0,000305 | 0,070043 | 0,16  | 0,098 | 1 |
| Dhcr24    | 0,000318 | 0,230596 | 0,58  | 0,535 | 1 |
| Irf2      | 0,000327 | -0,0862  | 0,443 | 0,535 | 1 |
| Ank2      | 0,000327 | -0,06732 | 0,996 | 1     | 1 |
| Ptprd     | 0,000332 | -0,08142 | 0,998 | 1     | 1 |
| Cyp27a1   | 0,000334 | -0,14035 | 0,427 | 0,493 | 1 |
| Sgk3      | 0,000336 | -0,08887 | 0,386 | 0,476 | 1 |
| Poc1a     | 0,000339 | 0,152423 | 0,464 | 0,392 | 1 |
| Sars      | 0,000343 | -0,07941 | 0,823 | 0,873 | 1 |
| Hist2h4   | 0,000347 | -0,03685 | 0,03  | 0,068 | 1 |
| Shisa4    | 0,00035  | -0,08683 | 0,974 | 0,989 | 1 |
| Nfic      | 0,000356 | 0,116178 | 0,925 | 0,915 | 1 |
| Dsel      | 0,000358 | -0,08489 | 0,169 | 0,241 | 1 |
| Acer2     | 0,000361 | -0,0544  | 0,073 | 0,125 | 1 |
| Enpp3     | 0,000373 | -0,04316 | 0,043 | 0,086 | 1 |
| Hapln2    | 0,000377 | -0,10039 | 0,957 | 0,964 | 1 |
| Map6d1    | 0,000379 | -0,09472 | 0,759 | 0,813 | 1 |
| Ldah      | 0,000386 | -0,08569 | 0,7   | 0,777 | 1 |
| 3830406C: | 0,000386 | -0,07603 | 0,373 | 0,467 | 1 |
| Spp1      | 0,000392 | 0,03804  | 0,048 | 0,015 | 1 |
| Gbp6      | 0,000394 | -0,04835 | 0,004 | 0,023 | 1 |
| Nprl2     | 0,000411 | -0,06991 | 0,235 | 0,314 | 1 |
| Iah1      | 0,000423 | -0,08483 | 0,298 | 0,385 | 1 |
| Ccdc77    | 0,000435 | -0,0532  | 0,172 | 0,247 | 1 |
| Brd2      | 0,000436 | 0,167522 | 0,827 | 0,78  | 1 |
| Flrt3     | 0,000438 | -0,05154 | 0,068 | 0,119 | 1 |
| Isg15     | 0,000442 | -0,05799 | 0,002 | 0,018 | 1 |
| Gbp2      | 0,000442 | -0,20876 | 0,002 | 0,018 | 1 |
| Prr5l     | 0,000448 | -0,0955  | 0,925 | 0,941 | 1 |
| Rap2b     | 0,00045  | -0,0837  | 0,17  | 0,241 | 1 |
| Mpp2      | 0,000454 | -0,09606 | 0,571 | 0,644 | 1 |
| Igtp      | 0,000454 | -0,46156 | 0,051 | 0,094 | 1 |
| Arsb      | 0,000456 | -0,10284 | 0,329 | 0,41  | 1 |
| Hspg2     | 0,000469 | 0,050042 | 0,036 | 0,008 | 1 |
| Mlst8     | 0,00047  | -0,07539 | 0,16  | 0,228 | 1 |
| Rbm39     | 0,000477 | 0,083822 | 0,995 | 0,985 | 1 |
| Cat       | 0,000488 | -0,14133 | 0,594 | 0,646 | 1 |
| Fmnl2     | 0,000488 | -0,11647 | 0,898 | 0,899 | 1 |
| Zfp62     | 0,0005   | -0,07743 | 0,38  | 0,473 | 1 |
| Rasgrp3   | 0,000502 | -0,11542 | 0,799 | 0,87  | 1 |
| Idi1      | 0,000502 | 0,222579 | 0,72  | 0,681 | 1 |
| Ube2b     | 0,000505 | -0,07733 | 0,833 | 0,888 | 1 |
| Ywhab     | 0,000508 | -0,08475 | 0,963 | 0,963 | 1 |
| Gnai2     | 0,000509 | 0,072908 | 0,996 | 0,998 | 1 |
| A930006I0 | 0,000513 | -0,05421 | 0,015 | 0,042 | 1 |

|          |          |          |       |       |   |
|----------|----------|----------|-------|-------|---|
| Cab39    | 0,000515 | -0,09007 | 0,644 | 0,725 | 1 |
| Pdk2     | 0,000515 | -0,0927  | 0,396 | 0,488 | 1 |
| mt-Nd3   | 0,000535 | -0,05266 | 0,999 | 1     | 1 |
| Fam107a  | 0,000546 | -0,03572 | 0,015 | 0,042 | 1 |
| Zfp942   | 0,000548 | -0,05515 | 0,132 | 0,198 | 1 |
| B3galt5  | 0,00055  | -0,12254 | 0,731 | 0,777 | 1 |
| Ttll5    | 0,000553 | -0,08478 | 0,401 | 0,486 | 1 |
| Meg3     | 0,000553 | -0,03476 | 0,03  | 0,067 | 1 |
| Tubg2    | 0,000555 | -0,05545 | 0,066 | 0,114 | 1 |
| Parp8    | 0,000562 | -0,06293 | 0,144 | 0,21  | 1 |
| Ppwd1    | 0,000594 | -0,07965 | 0,341 | 0,428 | 1 |
| Magt1    | 0,000594 | -0,10534 | 0,93  | 0,954 | 1 |
| Lrrtm1   | 0,000611 | -0,01355 | 0,001 | 0,015 | 1 |
| Snap25   | 0,000627 | -0,03552 | 0,029 | 0,065 | 1 |
| Plp2     | 0,00063  | 0,069836 | 0,099 | 0,052 | 1 |
| Adgr1    | 0,000631 | -0,06158 | 0,111 | 0,171 | 1 |
| Rps19    | 0,000633 | 0,089013 | 0,978 | 0,985 | 1 |
| Slc20a2  | 0,000642 | -0,09    | 0,771 | 0,837 | 1 |
| Tmem258  | 0,000643 | -0,0856  | 0,901 | 0,925 | 1 |
| Rpl3     | 0,000654 | 0,073577 | 0,997 | 0,993 | 1 |
| Hspa4l   | 0,000656 | -0,09796 | 0,585 | 0,663 | 1 |
| Col27a1  | 0,000673 | 0,087637 | 0,114 | 0,063 | 1 |
| Lmna     | 0,000675 | 0,155978 | 0,725 | 0,68  | 1 |
| Dnajb1   | 0,000692 | 0,298578 | 0,538 | 0,462 | 1 |
| Runx2    | 0,000693 | 0,054885 | 0,059 | 0,023 | 1 |
| Bace1    | 0,000704 | -0,09657 | 0,815 | 0,865 | 1 |
| Thsd7a   | 0,000712 | -0,10011 | 0,309 | 0,392 | 1 |
| Lztfl1   | 0,000718 | -0,09328 | 0,425 | 0,512 | 1 |
| Rhbdd1   | 0,000731 | -0,0634  | 0,146 | 0,211 | 1 |
| Rps19bp1 | 0,000731 | -0,0614  | 0,348 | 0,444 | 1 |
| Dusp3    | 0,000732 | -0,10516 | 0,863 | 0,894 | 1 |
| Ubb      | 0,000741 | 0,088872 | 0,999 | 1     | 1 |
| Pqlc2    | 0,000743 | 0,07446  | 0,18  | 0,119 | 1 |
| St18     | 0,000748 | -0,0878  | 0,816 | 0,831 | 1 |
| Gm29455  | 0,000748 | -0,06393 | 0,166 | 0,234 | 1 |
| Psmd8    | 0,00076  | -0,07783 | 0,688 | 0,79  | 1 |
| Lman2l   | 0,000761 | -0,06621 | 0,237 | 0,314 | 1 |
| Ptprs    | 0,00077  | 0,111672 | 0,351 | 0,276 | 1 |
| Ppp1cc   | 0,000774 | -0,12125 | 0,723 | 0,764 | 1 |
| Gmppb    | 0,000792 | -0,06246 | 0,133 | 0,195 | 1 |
| Rpl27    | 0,000803 | 0,085194 | 0,964 | 0,954 | 1 |
| Vwa5a    | 0,000811 | -0,08238 | 0,31  | 0,385 | 1 |
| Fam118a  | 0,000815 | -0,06514 | 0,121 | 0,179 | 1 |
| Paqr8    | 0,000816 | -0,15091 | 0,554 | 0,613 | 1 |
| Cntfr    | 0,00082  | 0,12623  | 0,421 | 0,351 | 1 |
| Rnf114   | 0,000828 | -0,07833 | 0,33  | 0,41  | 1 |
| Ak2      | 0,00083  | -0,09076 | 0,409 | 0,483 | 1 |
| Gas7     | 0,000842 | 0,087154 | 0,919 | 0,904 | 1 |
| Erg28    | 0,000848 | -0,07175 | 0,664 | 0,737 | 1 |
| Nckap5   | 0,000852 | 0,074399 | 0,134 | 0,081 | 1 |
| Sel1l3   | 0,000856 | -0,08241 | 0,126 | 0,184 | 1 |
| Wdr7     | 0,000869 | -0,06737 | 0,281 | 0,361 | 1 |

|           |          |          |       |       |   |
|-----------|----------|----------|-------|-------|---|
| Idnk      | 0,000876 | -0,12061 | 0,235 | 0,306 | 1 |
| Ttc14     | 0,000879 | -0,09702 | 0,759 | 0,828 | 1 |
| Zc3h3     | 0,000882 | -0,04535 | 0,108 | 0,166 | 1 |
| Ankrd11   | 0,000893 | -0,08809 | 0,846 | 0,898 | 1 |
| Hnrnp1    | 0,000893 | 0,108671 | 0,877 | 0,846 | 1 |
| Rasip1    | 0,000894 | 0,066732 | 0,079 | 0,037 | 1 |
| Dusp7     | 0,000898 | -0,11196 | 0,586 | 0,647 | 1 |
| Rap1a     | 0,000909 | 0,083126 | 0,995 | 0,993 | 1 |
| Aplp1     | 0,000912 | -0,05849 | 1     | 1     | 1 |
| Inpp5j    | 0,000924 | -0,05498 | 0,149 | 0,215 | 1 |
| Ptprn     | 0,000927 | 0,117325 | 0,274 | 0,208 | 1 |
| Nlrc5     | 0,000943 | -0,07899 | 0,046 | 0,086 | 1 |
| Leprot    | 0,000944 | -0,07578 | 0,646 | 0,724 | 1 |
| Hspa5     | 0,000947 | -0,09863 | 0,935 | 0,964 | 1 |
| Grhpr     | 0,000948 | -0,08105 | 0,625 | 0,715 | 1 |
| Nol3      | 0,00095  | 0,10099  | 0,385 | 0,301 | 1 |
| Lbh       | 0,000952 | 0,123224 | 0,882 | 0,834 | 1 |
| Tmem242   | 0,000962 | -0,06652 | 0,292 | 0,376 | 1 |
| Ldlr      | 0,000964 | 0,296723 | 0,436 | 0,377 | 1 |
| Tox       | 0,000969 | -0,03863 | 0,053 | 0,096 | 1 |
| Tcn2      | 0,000978 | -0,08094 | 0,282 | 0,358 | 1 |
| Zfp36     | 0,000984 | 0,310641 | 0,312 | 0,244 | 1 |
| St8sia1   | 0,000988 | -0,02523 | 0,011 | 0,034 | 1 |
| Cacna1h   | 0,000998 | 0,087747 | 0,09  | 0,047 | 1 |
| Pcyt1b    | 0,001006 | -0,09982 | 0,364 | 0,436 | 1 |
| B230118H  | 0,001006 | -0,09093 | 0,628 | 0,686 | 1 |
| Golph3l   | 0,00101  | -0,07049 | 0,211 | 0,281 | 1 |
| Srsf2     | 0,001019 | 0,103699 | 0,97  | 0,943 | 1 |
| Nln       | 0,00102  | 0,080896 | 0,229 | 0,163 | 1 |
| Sgms1     | 0,001022 | -0,06608 | 0,303 | 0,387 | 1 |
| Txndc12   | 0,001038 | -0,07174 | 0,445 | 0,538 | 1 |
| Slpi      | 0,001044 | 0,080578 | 0,164 | 0,107 | 1 |
| Mecr      | 0,001044 | -0,05127 | 0,133 | 0,195 | 1 |
| Scarb2    | 0,001045 | 0,100265 | 0,992 | 0,992 | 1 |
| Lgalsl    | 0,001046 | 0,038962 | 0,08  | 0,039 | 1 |
| Mvk       | 0,00105  | 0,107105 | 0,427 | 0,356 | 1 |
| Nfkbiz    | 0,001054 | 0,088389 | 0,095 | 0,05  | 1 |
| Insc      | 0,001079 | -0,06911 | 0,851 | 0,888 | 1 |
| Bcas1os1  | 0,001084 | 0,035913 | 0,039 | 0,011 | 1 |
| Rnf170    | 0,001085 | -0,06843 | 0,244 | 0,32  | 1 |
| 9330182LC | 0,001086 | -0,10612 | 0,483 | 0,558 | 1 |
| Ubald2    | 0,001086 | -0,07264 | 0,508 | 0,585 | 1 |
| Dpyd      | 0,001117 | -0,08163 | 0,16  | 0,224 | 1 |
| Kcnq3     | 0,001139 | -0,10421 | 0,685 | 0,738 | 1 |
| Tspan7    | 0,001164 | -0,08323 | 0,406 | 0,494 | 1 |
| Piga      | 0,001164 | -0,09105 | 0,508 | 0,579 | 1 |
| Nmnat1    | 0,001174 | -0,04174 | 0,06  | 0,104 | 1 |
| Gripap1   | 0,00118  | -0,07987 | 0,472 | 0,553 | 1 |
| Csnk1e    | 0,001188 | -0,07532 | 0,7   | 0,774 | 1 |
| Rnf130    | 0,001195 | -0,07272 | 0,977 | 0,984 | 1 |
| Enpp1     | 0,001198 | -0,09581 | 0,33  | 0,405 | 1 |
| Spock1    | 0,001198 | -0,11528 | 0,74  | 0,785 | 1 |

|           |          |          |       |       |   |
|-----------|----------|----------|-------|-------|---|
| Glod4     | 0,001202 | -0,08044 | 0,793 | 0,837 | 1 |
| Qpct      | 0,001202 | 0,099692 | 0,501 | 0,429 | 1 |
| Tspan9    | 0,001205 | -0,10354 | 0,258 | 0,33  | 1 |
| Pcyt2     | 0,001221 | 0,122798 | 0,911 | 0,902 | 1 |
| Akirin1   | 0,001222 | -0,07985 | 0,669 | 0,751 | 1 |
| Slc46a2   | 0,001245 | -0,03627 | 0,033 | 0,068 | 1 |
| Cacybp    | 0,001246 | -0,08159 | 0,689 | 0,771 | 1 |
| Slc25a27  | 0,001268 | -0,14075 | 0,411 | 0,48  | 1 |
| Jpt2      | 0,001278 | -0,06882 | 0,367 | 0,455 | 1 |
| Tmed10    | 0,001293 | 0,059291 | 0,999 | 1     | 1 |
| Zcchc24   | 0,001297 | -0,07373 | 0,817 | 0,867 | 1 |
| Spry2     | 0,001301 | -0,06798 | 0,28  | 0,356 | 1 |
| Tax1bp1   | 0,001304 | -0,10238 | 0,836 | 0,875 | 1 |
| Ralbp1    | 0,001318 | -0,08379 | 0,79  | 0,846 | 1 |
| Pcnx      | 0,001319 | -0,05705 | 0,276 | 0,356 | 1 |
| Snx13     | 0,001327 | -0,07079 | 0,374 | 0,455 | 1 |
| Pantr1    | 0,001365 | -0,05743 | 0,372 | 0,46  | 1 |
| Ephb2     | 0,001367 | 0,051015 | 0,051 | 0,02  | 1 |
| Nenf      | 0,00137  | 0,094002 | 0,877 | 0,855 | 1 |
| Rtn1      | 0,001375 | -0,04138 | 0,03  | 0,063 | 1 |
| Zfp787    | 0,001379 | -0,0573  | 0,214 | 0,286 | 1 |
| Atg3      | 0,001384 | -0,06424 | 0,792 | 0,828 | 1 |
| Rpl19     | 0,00139  | 0,072064 | 0,997 | 0,998 | 1 |
| Myo1d     | 0,001405 | -0,08096 | 0,805 | 0,837 | 1 |
| Aldh3b1   | 0,001406 | 0,079579 | 0,323 | 0,247 | 1 |
| Fkbp4     | 0,001414 | -0,07639 | 0,798 | 0,852 | 1 |
| Ncald     | 0,001421 | -0,08976 | 0,842 | 0,888 | 1 |
| Adgrv1    | 0,001424 | -0,10439 | 0,264 | 0,33  | 1 |
| Fsd1l     | 0,001425 | -0,08123 | 0,562 | 0,613 | 1 |
| mt-Co1    | 0,001431 | -0,06376 | 1     | 1     | 1 |
| Col6a1    | 0,001435 | 0,113979 | 0,111 | 0,063 | 1 |
| Mtmr2     | 0,001439 | 0,096112 | 0,782 | 0,74  | 1 |
| Oaz1      | 0,001451 | -0,07206 | 0,99  | 0,995 | 1 |
| Gm39318   | 0,001455 | -0,02042 | 0,007 | 0,026 | 1 |
| Fpgt      | 0,001457 | -0,07989 | 0,234 | 0,302 | 1 |
| Carnmt1   | 0,001473 | -0,06498 | 0,232 | 0,302 | 1 |
| Copa      | 0,001474 | -0,08057 | 0,713 | 0,761 | 1 |
| Sdr39u1   | 0,001507 | 0,042816 | 0,077 | 0,037 | 1 |
| Pgp       | 0,001507 | -0,08475 | 0,895 | 0,906 | 1 |
| Mospd1    | 0,001509 | -0,07097 | 0,16  | 0,223 | 1 |
| Nek9      | 0,001517 | -0,06193 | 0,407 | 0,502 | 1 |
| Cic       | 0,001517 | 0,110572 | 0,523 | 0,46  | 1 |
| 2010315B( | 0,001525 | -0,04941 | 0,09  | 0,141 | 1 |
| Dusp26    | 0,001526 | -0,06124 | 0,93  | 0,958 | 1 |
| Socs4     | 0,001529 | -0,07439 | 0,265 | 0,338 | 1 |
| Rapgef5   | 0,001531 | -0,13337 | 0,436 | 0,511 | 1 |
| App       | 0,001555 | -0,05438 | 0,999 | 1     | 1 |
| Gas6      | 0,001559 | 0,075426 | 0,255 | 0,187 | 1 |
| Atp2a2    | 0,001576 | -0,07971 | 0,868 | 0,898 | 1 |
| Pon2      | 0,001578 | -0,07813 | 0,594 | 0,657 | 1 |
| Olfr338   | 0,001592 | -0,00971 | 0     | 0,01  | 1 |
| Gm12953   | 0,001592 | -0,00971 | 0     | 0,01  | 1 |



|           |          |          |       |       |   |
|-----------|----------|----------|-------|-------|---|
| Gm42743   | 0,001592 | -0,01453 | 0     | 0,01  | 1 |
| Zbp1      | 0,001592 | -0,04297 | 0     | 0,01  | 1 |
| Tgfa      | 0,001596 | -0,06798 | 0,823 | 0,867 | 1 |
| Dusp19    | 0,001623 | -0,0697  | 0,301 | 0,376 | 1 |
| Eif3c     | 0,001628 | 0,084971 | 0,946 | 0,925 | 1 |
| Cebpz     | 0,001636 | -0,07466 | 0,574 | 0,642 | 1 |
| Ankmy1    | 0,001641 | 0,049955 | 0,076 | 0,037 | 1 |
| mt-Nd4l   | 0,001641 | -0,06305 | 0,992 | 0,99  | 1 |
| Aspdh     | 0,001642 | 0,025388 | 0,029 | 0,007 | 1 |
| Ttyh2     | 0,001643 | -0,05874 | 0,986 | 0,99  | 1 |
| Neo1      | 0,001648 | -0,06694 | 0,781 | 0,852 | 1 |
| Ostc      | 0,001675 | -0,07452 | 0,499 | 0,576 | 1 |
| Fnta      | 0,001704 | -0,07268 | 0,834 | 0,867 | 1 |
| Tmem125   | 0,001716 | -0,09234 | 0,805 | 0,837 | 1 |
| Serp1b1a  | 0,001717 | -0,11281 | 0,904 | 0,938 | 1 |
| Hipk2     | 0,00172  | 0,087644 | 0,95  | 0,946 | 1 |
| Gm16049   | 0,001758 | -0,02598 | 0,01  | 0,031 | 1 |
| Dgcr8     | 0,001759 | -0,07051 | 0,184 | 0,247 | 1 |
| Mmp11     | 0,001762 | -0,03846 | 0,046 | 0,085 | 1 |
| Kmt2e     | 0,001769 | 0,10302  | 0,908 | 0,889 | 1 |
| Ppip5k2   | 0,00177  | -0,08112 | 0,344 | 0,418 | 1 |
| Apoa1     | 0,001773 | 0,028625 | 0,02  | 0,002 | 1 |
| Grina     | 0,001784 | 0,105757 | 0,748 | 0,702 | 1 |
| Car13     | 0,001787 | -0,04239 | 0,049 | 0,088 | 1 |
| Spg20     | 0,001791 | -0,06304 | 0,967 | 0,979 | 1 |
| Plekhh2   | 0,001793 | -0,10463 | 0,244 | 0,311 | 1 |
| Iqsec1    | 0,001801 | 0,132546 | 0,89  | 0,852 | 1 |
| Apc       | 0,001808 | 0,096944 | 0,952 | 0,946 | 1 |
| Gm27200   | 0,001809 | -0,05272 | 0,101 | 0,153 | 1 |
| Tank      | 0,001819 | -0,06304 | 0,249 | 0,322 | 1 |
| Pcp4      | 0,001824 | -0,02561 | 0,01  | 0,031 | 1 |
| Ctss      | 0,001847 | 0,032065 | 0,06  | 0,026 | 1 |
| Kit       | 0,001866 | 0,047955 | 0,072 | 0,034 | 1 |
| Fam20b    | 0,001879 | -0,05471 | 0,168 | 0,233 | 1 |
| Card19    | 0,001901 | 0,100257 | 0,723 | 0,688 | 1 |
| Skil      | 0,001902 | 0,105135 | 0,357 | 0,283 | 1 |
| S100a1    | 0,001909 | 0,072929 | 0,941 | 0,919 | 1 |
| Etaa1os   | 0,00191  | -0,02986 | 0,033 | 0,067 | 1 |
| Adss      | 0,001923 | -0,07948 | 0,264 | 0,335 | 1 |
| Gm31793   | 0,001927 | -0,02018 | 0,004 | 0,02  | 1 |
| Resp18    | 0,001935 | -0,017   | 0,004 | 0,02  | 1 |
| Srsf3     | 0,001943 | 0,086204 | 0,944 | 0,933 | 1 |
| Grik2     | 0,001998 | -0,09916 | 0,321 | 0,4   | 1 |
| Jak2      | 0,001998 | -0,09891 | 0,43  | 0,504 | 1 |
| Cant1     | 0,002001 | -0,07662 | 0,345 | 0,42  | 1 |
| Polr1d    | 0,00201  | -0,07711 | 0,65  | 0,725 | 1 |
| Gm5113    | 0,002013 | -0,05888 | 0,12  | 0,174 | 1 |
| Thumpd2   | 0,002041 | -0,03289 | 0,044 | 0,081 | 1 |
| Apoe      | 0,002047 | -0,09201 | 0,962 | 0,93  | 1 |
| Nt5c      | 0,002055 | -0,0692  | 0,316 | 0,392 | 1 |
| Hist1h2ap | 0,002058 | 0,020033 | 0,023 | 0,003 | 1 |
| Tdrd6     | 0,002065 | -0,06213 | 0,087 | 0,135 | 1 |

|           |          |          |       |       |   |
|-----------|----------|----------|-------|-------|---|
| Cdh10     | 0,002073 | -0,07983 | 0,286 | 0,363 | 1 |
| Fam133b   | 0,002077 | -0,08659 | 0,63  | 0,688 | 1 |
| Celsr2    | 0,002078 | -0,07672 | 0,308 | 0,384 | 1 |
| Fbxw4     | 0,002081 | -0,05224 | 0,14  | 0,198 | 1 |
| Golim4    | 0,002082 | -0,09217 | 0,311 | 0,38  | 1 |
| Hist1h4h  | 0,002086 | -0,08162 | 0,2   | 0,265 | 1 |
| Crip2     | 0,002114 | 0,079179 | 0,371 | 0,289 | 1 |
| Dennd1c   | 0,00212  | 0,046331 | 0,031 | 0,008 | 1 |
| Akr1b3    | 0,002121 | -0,06803 | 0,607 | 0,701 | 1 |
| Tmem170   | 0,002149 | -0,05822 | 0,185 | 0,25  | 1 |
| Mepce     | 0,002166 | 0,105391 | 0,376 | 0,315 | 1 |
| B230209E1 | 0,002171 | -0,04134 | 0,075 | 0,12  | 1 |
| 2810006K1 | 0,002176 | -0,05589 | 0,127 | 0,182 | 1 |
| Rgs2      | 0,002178 | 0,054004 | 0,081 | 0,042 | 1 |
| Ppm1k     | 0,002185 | -0,06038 | 0,278 | 0,353 | 1 |
| Dnajc3    | 0,002197 | -0,05143 | 0,816 | 0,867 | 1 |
| Zfand6    | 0,002205 | -0,09331 | 0,657 | 0,711 | 1 |
| Prkci     | 0,002241 | -0,05581 | 0,153 | 0,213 | 1 |
| P2ry12    | 0,002253 | -0,04473 | 0,051 | 0,089 | 1 |
| Gm28172   | 0,002275 | -0,04206 | 0,041 | 0,076 | 1 |
| Ubl3      | 0,002277 | -0,06905 | 0,955 | 0,976 | 1 |
| Loxl3     | 0,002299 | -0,02079 | 0,005 | 0,021 | 1 |
| Lrp1      | 0,002321 | -0,01761 | 0,005 | 0,021 | 1 |
| Pip4k2a   | 0,002342 | -0,07835 | 0,989 | 0,995 | 1 |
| Dmxl1     | 0,002354 | -0,07673 | 0,575 | 0,652 | 1 |
| Kcnab1    | 0,002368 | 0,083603 | 0,165 | 0,111 | 1 |
| Cyp2j9    | 0,002383 | -0,05712 | 0,096 | 0,145 | 1 |
| Gm20404   | 0,002397 | 0,03126  | 0,054 | 0,023 | 1 |
| Gm6133    | 0,002412 | -0,01417 | 0,002 | 0,015 | 1 |
| Rnpep     | 0,002419 | -0,06416 | 0,338 | 0,42  | 1 |
| Pik3c2b   | 0,002434 | -0,05871 | 0,768 | 0,836 | 1 |
| Psmb10    | 0,002445 | -0,19674 | 0,152 | 0,207 | 1 |
| Kbtbd11   | 0,002462 | -0,04217 | 0,073 | 0,117 | 1 |
| Prrg1     | 0,002474 | -0,1073  | 0,556 | 0,613 | 1 |
| Aven      | 0,002481 | -0,09767 | 0,223 | 0,288 | 1 |
| Inip      | 0,002502 | -0,0603  | 0,168 | 0,228 | 1 |
| Ptk2      | 0,002534 | -0,07768 | 0,756 | 0,815 | 1 |
| Ltv1      | 0,002537 | -0,06556 | 0,261 | 0,332 | 1 |
| Arhgap24  | 0,002551 | -0,03207 | 0,021 | 0,047 | 1 |
| Mmp15     | 0,002566 | -0,06459 | 0,135 | 0,19  | 1 |
| Ppp6r2    | 0,002569 | -0,08661 | 0,37  | 0,439 | 1 |
| Gna11     | 0,002585 | -0,07343 | 0,781 | 0,824 | 1 |
| Nkiras2   | 0,002653 | -0,05661 | 0,171 | 0,231 | 1 |
| Slc25a10  | 0,002654 | -0,07463 | 0,239 | 0,306 | 1 |
| Tprn      | 0,002671 | 0,092435 | 0,884 | 0,859 | 1 |
| Ptn       | 0,002688 | 0,098108 | 0,965 | 0,945 | 1 |
| Zcchc8    | 0,002757 | -0,06027 | 0,248 | 0,319 | 1 |
| Pmm1      | 0,002775 | -0,07094 | 0,64  | 0,72  | 1 |
| Rexo1     | 0,002783 | -0,06114 | 0,355 | 0,433 | 1 |
| Rogdi     | 0,002786 | -0,04926 | 0,182 | 0,246 | 1 |
| Nipa1     | 0,002822 | -0,06703 | 0,917 | 0,943 | 1 |
| Tpi1      | 0,002831 | 0,118138 | 0,611 | 0,548 | 1 |

|          |          |          |       |       |   |
|----------|----------|----------|-------|-------|---|
| Tmem50b  | 0,002844 | -0,07081 | 0,434 | 0,519 | 1 |
| Phf13    | 0,002846 | 0,058221 | 0,146 | 0,096 | 1 |
| Dusp11   | 0,002851 | -0,07188 | 0,74  | 0,816 | 1 |
| Csdc2    | 0,002855 | -0,05954 | 0,107 | 0,156 | 1 |
| Uap111   | 0,002864 | 0,116516 | 0,345 | 0,289 | 1 |
| Usf3     | 0,002869 | -0,05823 | 0,21  | 0,273 | 1 |
| Cd46     | 0,002873 | -0,0448  | 0,043 | 0,078 | 1 |
| Got1     | 0,00288  | -0,07641 | 0,395 | 0,468 | 1 |
| Olfr671  | 0,002901 | -0,05506 | 0,108 | 0,159 | 1 |
| Cp       | 0,002902 | -0,01884 | 0,007 | 0,024 | 1 |
| Fam120b  | 0,002904 | -0,07855 | 0,349 | 0,42  | 1 |
| Sema4c   | 0,002904 | 0,085606 | 0,298 | 0,234 | 1 |
| Grcc10   | 0,002905 | 0,089821 | 0,505 | 0,446 | 1 |
| Smim10l1 | 0,002906 | -0,07796 | 0,65  | 0,719 | 1 |
| Bcl11b   | 0,00292  | -0,01725 | 0,007 | 0,024 | 1 |
| Fdps     | 0,002924 | 0,138912 | 0,835 | 0,813 | 1 |
| Tex52    | 0,002938 | -0,06493 | 0,25  | 0,317 | 1 |
| Tsc22d1  | 0,002945 | 0,10064  | 0,306 | 0,241 | 1 |
| A930024E | 0,002946 | -0,02568 | 0,018 | 0,042 | 1 |
| Trim7    | 0,002946 | -0,06766 | 0,142 | 0,197 | 1 |
| Rbck1    | 0,002954 | -0,06943 | 0,478 | 0,553 | 1 |
| Vmp1     | 0,002955 | -0,07526 | 0,979 | 0,984 | 1 |
| Thsd4    | 0,002958 | -0,05463 | 0,086 | 0,132 | 1 |
| Rnft1    | 0,002961 | 0,053784 | 0,098 | 0,057 | 1 |
| Itgb3    | 0,003011 | -0,03258 | 0,063 | 0,104 | 1 |
| Dmtf1    | 0,003025 | -0,07495 | 0,4   | 0,472 | 1 |
| Ephb1    | 0,00303  | -0,08949 | 0,84  | 0,88  | 1 |
| Chp1     | 0,00305  | -0,07925 | 0,394 | 0,46  | 1 |
| Numbl    | 0,003066 | -0,04259 | 0,108 | 0,159 | 1 |
| Rbm3     | 0,003071 | 0,117923 | 0,569 | 0,522 | 1 |
| Jph1     | 0,003095 | -0,0665  | 0,545 | 0,608 | 1 |
| Dnaja2   | 0,003171 | -0,07545 | 0,739 | 0,785 | 1 |
| C2cd3    | 0,003174 | -0,06036 | 0,181 | 0,241 | 1 |
| Msn      | 0,003184 | 0,114507 | 0,61  | 0,556 | 1 |
| Ruvbl1   | 0,003185 | -0,05108 | 0,359 | 0,442 | 1 |
| Vps50    | 0,003202 | -0,06642 | 0,396 | 0,468 | 1 |
| Pxdn     | 0,003211 | -0,05952 | 0,128 | 0,18  | 1 |
| Apbb1ip  | 0,003222 | -0,04963 | 0,168 | 0,229 | 1 |
| Acadl    | 0,003222 | -0,0872  | 0,547 | 0,61  | 1 |
| Hnmt     | 0,003223 | -0,02679 | 0,014 | 0,036 | 1 |
| 1110032A | 0,003225 | -0,07008 | 0,395 | 0,481 | 1 |
| Olfml1   | 0,00325  | 0,098314 | 0,598 | 0,528 | 1 |
| Aldh6a1  | 0,003274 | -0,07907 | 0,677 | 0,72  | 1 |
| Ctr9     | 0,003277 | -0,05273 | 0,639 | 0,728 | 1 |
| Enpp2    | 0,003284 | -0,05338 | 0,999 | 1     | 1 |
| Pex12    | 0,003334 | 0,040403 | 0,113 | 0,068 | 1 |
| Slc4a4   | 0,003342 | -0,02005 | 0,014 | 0,036 | 1 |
| Rab5a    | 0,003346 | -0,06893 | 0,842 | 0,865 | 1 |
| BC030499 | 0,003352 | -0,02247 | 0,011 | 0,031 | 1 |
| Myh7b    | 0,00336  | 0,090005 | 0,242 | 0,18  | 1 |
| Insr     | 0,003366 | -0,05529 | 0,357 | 0,437 | 1 |
| Srebf1   | 0,00339  | -0,08106 | 0,562 | 0,639 | 1 |

|          |          |          |       |       |   |
|----------|----------|----------|-------|-------|---|
| Rab5b    | 0,003393 | -0,07382 | 0,658 | 0,711 | 1 |
| Tmem129  | 0,003399 | -0,05319 | 0,226 | 0,293 | 1 |
| Fam19a5  | 0,003401 | 0,092401 | 0,516 | 0,455 | 1 |
| Pla2g16  | 0,003401 | -0,05499 | 0,998 | 1     | 1 |
| Magi1    | 0,003418 | -0,0712  | 0,711 | 0,761 | 1 |
| Cadm2    | 0,003451 | -0,09542 | 0,59  | 0,634 | 1 |
| Dip2b    | 0,003453 | -0,05605 | 0,965 | 0,974 | 1 |
| Trim56   | 0,003457 | -0,06138 | 0,084 | 0,13  | 1 |
| Ppm1l    | 0,003469 | -0,07798 | 0,335 | 0,407 | 1 |
| Rnf213   | 0,00347  | -0,0661  | 0,049 | 0,085 | 1 |
| Barx2    | 0,003481 | -0,06142 | 0,059 | 0,098 | 1 |
| Enpp5    | 0,003489 | 0,064297 | 0,921 | 0,917 | 1 |
| Suv39h2  | 0,003504 | 0,032438 | 0,04  | 0,015 | 1 |
| Gng8     | 0,003516 | 0,138768 | 0,45  | 0,398 | 1 |
| Cdc42bpa | 0,003523 | -0,06605 | 0,958 | 0,969 | 1 |
| Tpd5211  | 0,003536 | -0,01034 | 0,001 | 0,011 | 1 |
| Tmigd1   | 0,003536 | -0,01034 | 0,001 | 0,011 | 1 |
| Nell2    | 0,003536 | -0,01034 | 0,001 | 0,011 | 1 |
| Rab44    | 0,003536 | -0,01034 | 0,001 | 0,011 | 1 |
| Enah     | 0,003542 | -0,08321 | 0,27  | 0,335 | 1 |
| Gprc5b   | 0,003549 | -0,06945 | 0,977 | 0,989 | 1 |
| Syt9     | 0,003552 | -0,05802 | 0,107 | 0,156 | 1 |
| Bst2     | 0,003602 | -0,18706 | 0,043 | 0,076 | 1 |
| Stard3nl | 0,003603 | -0,07967 | 0,703 | 0,754 | 1 |
| Sass6    | 0,003611 | -0,0753  | 0,345 | 0,411 | 1 |
| Rps28    | 0,003614 | 0,076948 | 0,988 | 0,985 | 1 |
| Phc1     | 0,003629 | -0,07544 | 0,496 | 0,563 | 1 |
| Ubxn2a   | 0,003648 | -0,07976 | 0,342 | 0,41  | 1 |
| Slc2a1   | 0,003655 | -0,0747  | 0,653 | 0,722 | 1 |
| Ctso     | 0,003691 | -0,07298 | 0,349 | 0,418 | 1 |
| Tbcel    | 0,0037   | -0,08662 | 0,387 | 0,447 | 1 |
| Srp72    | 0,003714 | -0,07844 | 0,548 | 0,6   | 1 |
| Slc25a3  | 0,003726 | 0,077396 | 0,931 | 0,896 | 1 |
| Parp11   | 0,003764 | -0,03843 | 0,063 | 0,102 | 1 |
| Fah      | 0,003771 | -0,10753 | 0,6   | 0,649 | 1 |
| Rnls     | 0,003777 | -0,03769 | 0,063 | 0,102 | 1 |
| Tmem63a  | 0,003783 | -0,09869 | 0,968 | 0,964 | 1 |
| Cdc42ep4 | 0,003797 | -0,0464  | 0,081 | 0,125 | 1 |
| Skiv2l   | 0,003798 | -0,05783 | 0,35  | 0,421 | 1 |
| Tanc2    | 0,003798 | -0,07052 | 0,368 | 0,444 | 1 |
| Cirbp    | 0,003807 | 0,114403 | 0,733 | 0,727 | 1 |
| Nhlrc3   | 0,00382  | -0,05754 | 0,161 | 0,218 | 1 |
| 9330198N | 0,003851 | 0,086227 | 0,281 | 0,223 | 1 |
| Paf1     | 0,003854 | -0,07121 | 0,39  | 0,463 | 1 |
| Dnaja4   | 0,003862 | -0,06003 | 0,141 | 0,195 | 1 |
| Specc1   | 0,003864 | -0,08618 | 0,829 | 0,854 | 1 |
| Pcdh7    | 0,003878 | -0,05451 | 0,05  | 0,086 | 1 |
| Kcnu1    | 0,003879 | -0,03624 | 0,059 | 0,098 | 1 |
| Chpt1    | 0,003888 | -0,09079 | 0,778 | 0,816 | 1 |
| Dido1    | 0,003908 | -0,07304 | 0,333 | 0,402 | 1 |
| Slitrk5  | 0,003937 | -0,04706 | 0,039 | 0,072 | 1 |
| Arrb2    | 0,003949 | -0,04707 | 0,123 | 0,174 | 1 |

|          |          |          |       |       |   |
|----------|----------|----------|-------|-------|---|
| Gamt     | 0,003954 | 0,098351 | 0,859 | 0,813 | 1 |
| Ifnk     | 0,003961 | -0,0081  | 0     | 0,008 | 1 |
| Btbd17   | 0,003961 | -0,0081  | 0     | 0,008 | 1 |
| Dgkb     | 0,003961 | -0,00971 | 0     | 0,008 | 1 |
| Daam1    | 0,003979 | 0,097037 | 0,915 | 0,899 | 1 |
| Heg1     | 0,003991 | -0,07305 | 0,324 | 0,395 | 1 |
| Natd1    | 0,004004 | -0,05731 | 0,186 | 0,246 | 1 |
| Smurf2   | 0,00401  | -0,06921 | 0,317 | 0,385 | 1 |
| Tgfb1    | 0,004055 | 0,124669 | 0,267 | 0,208 | 1 |
| Sybu     | 0,004062 | -0,08474 | 0,306 | 0,369 | 1 |
| Gm4876   | 0,004066 | -0,03149 | 0,021 | 0,046 | 1 |
| Tbl1x    | 0,004074 | -0,09192 | 0,444 | 0,511 | 1 |
| Fbrsl1   | 0,004076 | -0,07359 | 0,245 | 0,307 | 1 |
| Cdkn1c   | 0,00408  | 0,026006 | 0,443 | 0,354 | 1 |
| 9030025P | 0,004084 | 0,067845 | 0,197 | 0,143 | 1 |
| Ocrl     | 0,004104 | -0,05908 | 0,164 | 0,22  | 1 |
| Cd68     | 0,004104 | 0,027919 | 0,047 | 0,02  | 1 |
| Tgtp2    | 0,004116 | -0,03862 | 0,004 | 0,018 | 1 |
| Pxmp4    | 0,004121 | 0,061746 | 0,345 | 0,283 | 1 |
| Gm33594  | 0,004129 | -0,07568 | 0,29  | 0,354 | 1 |
| Ckmt1    | 0,004146 | -0,01541 | 0,004 | 0,018 | 1 |
| Basp1    | 0,004157 | -0,07646 | 0,056 | 0,093 | 1 |
| Yod1     | 0,004182 | -0,05755 | 0,273 | 0,343 | 1 |
| Nudt16l1 | 0,004188 | -0,07679 | 0,44  | 0,511 | 1 |
| Lzic     | 0,004189 | -0,05528 | 0,183 | 0,242 | 1 |
| Begain   | 0,004206 | -0,07172 | 0,088 | 0,132 | 1 |
| Anxa5    | 0,004208 | 0,012561 | 0,745 | 0,667 | 1 |
| Psmd10   | 0,004236 | -0,05712 | 0,254 | 0,322 | 1 |
| Sertad2  | 0,004283 | 0,115123 | 0,498 | 0,449 | 1 |
| Ttc33    | 0,004309 | -0,06627 | 0,414 | 0,481 | 1 |
| Aen      | 0,004316 | -0,04577 | 0,163 | 0,221 | 1 |
| Kmt5a    | 0,004323 | -0,05651 | 0,842 | 0,891 | 1 |
| Coro1c   | 0,004324 | 0,125891 | 0,703 | 0,673 | 1 |
| Klf6     | 0,004353 | 0,173433 | 0,612 | 0,572 | 1 |
| Rfx3     | 0,004392 | -0,0579  | 0,157 | 0,211 | 1 |
| Mospd2   | 0,004405 | -0,07344 | 0,377 | 0,437 | 1 |
| Igf1r    | 0,004409 | -0,11003 | 0,569 | 0,618 | 1 |
| Nufip1   | 0,004442 | 0,056881 | 0,179 | 0,127 | 1 |
| Zdhhc20  | 0,004454 | -0,07417 | 0,967 | 0,979 | 1 |
| Ctnna2   | 0,004479 | -0,11529 | 0,449 | 0,514 | 1 |
| Degs1    | 0,004505 | 0,067314 | 0,984 | 0,995 | 1 |
| Gm5141   | 0,00451  | -0,04473 | 0,052 | 0,088 | 1 |
| Azi2     | 0,004511 | -0,08396 | 0,374 | 0,442 | 1 |
| Fam198b  | 0,004521 | -0,03757 | 0,038 | 0,07  | 1 |
| Abhd12   | 0,004552 | -0,07739 | 0,843 | 0,893 | 1 |
| Coq8a    | 0,004555 | -0,0498  | 0,17  | 0,228 | 1 |
| Prickle3 | 0,004557 | 0,057968 | 0,083 | 0,047 | 1 |
| Rftn2    | 0,004613 | -0,07238 | 0,369 | 0,437 | 1 |
| Chadl    | 0,004618 | 0,059892 | 0,135 | 0,089 | 1 |
| Wipi2    | 0,004627 | -0,07653 | 0,582 | 0,647 | 1 |
| Gba      | 0,004635 | -0,06513 | 0,342 | 0,411 | 1 |
| Gab2     | 0,004637 | -0,05773 | 0,14  | 0,193 | 1 |

|           |          |          |       |       |   |
|-----------|----------|----------|-------|-------|---|
| Lig3      | 0,004657 | -0,08049 | 0,497 | 0,554 | 1 |
| Mrps34    | 0,004665 | -0,05867 | 0,398 | 0,472 | 1 |
| Erbp3     | 0,004668 | -0,0884  | 0,627 | 0,681 | 1 |
| Slc33a1   | 0,004681 | -0,05938 | 0,344 | 0,415 | 1 |
| Dcdc2a    | 0,004691 | -0,05499 | 0,214 | 0,278 | 1 |
| Atp2c1    | 0,004713 | -0,06888 | 0,903 | 0,912 | 1 |
| Tial1     | 0,004713 | -0,08229 | 0,637 | 0,689 | 1 |
| Brwd3     | 0,004715 | -0,06942 | 0,2   | 0,259 | 1 |
| 5031439G  | 0,004752 | 0,074864 | 0,979 | 0,987 | 1 |
| Mamdc4    | 0,004767 | -0,02079 | 0,005 | 0,02  | 1 |
| Vta1      | 0,004769 | -0,07722 | 0,658 | 0,719 | 1 |
| Fam102b   | 0,004788 | 0,053596 | 0,109 | 0,067 | 1 |
| Alg11     | 0,004851 | -0,06808 | 0,248 | 0,309 | 1 |
| Hsd17b12  | 0,004851 | -0,05111 | 0,821 | 0,875 | 1 |
| Ppp3ca    | 0,00486  | -0,06045 | 0,914 | 0,946 | 1 |
| Lzts2     | 0,004869 | 0,082785 | 0,958 | 0,93  | 1 |
| Gpr107    | 0,004894 | -0,06073 | 0,395 | 0,475 | 1 |
| Vps13c    | 0,004897 | -0,06709 | 0,289 | 0,354 | 1 |
| Cops5     | 0,004906 | -0,06752 | 0,721 | 0,784 | 1 |
| C3        | 0,004938 | 0,01558  | 0,013 | 0     | 1 |
| Mag       | 0,004962 | -0,04711 | 0,998 | 1     | 1 |
| Apod      | 0,004967 | -0,23242 | 0,998 | 1     | 1 |
| Arhgap23  | 0,004977 | 0,09067  | 0,976 | 0,992 | 1 |
| Agbl5     | 0,00498  | -0,02353 | 0,018 | 0,041 | 1 |
| Pabpc1    | 0,005001 | 0,102766 | 0,867 | 0,833 | 1 |
| 1700063D  | 0,005034 | -0,11961 | 0,222 | 0,28  | 1 |
| Ptma      | 0,005059 | 0,059659 | 0,999 | 1     | 1 |
| A330008L1 | 0,005063 | -0,03341 | 0,017 | 0,039 | 1 |
| Slc35e2   | 0,005067 | -0,05814 | 0,219 | 0,28  | 1 |
| Ap1m1     | 0,005075 | -0,04572 | 0,273 | 0,34  | 1 |
| Hunk      | 0,0051   | -0,03347 | 0,047 | 0,081 | 1 |
| Endod1    | 0,005113 | 0,041547 | 0,986 | 0,985 | 1 |
| Pcgf6     | 0,005114 | -0,05297 | 0,118 | 0,166 | 1 |
| Srcap     | 0,005134 | 0,085555 | 0,321 | 0,26  | 1 |
| Nprl3     | 0,005153 | -0,0412  | 0,114 | 0,163 | 1 |
| Tprgl     | 0,005178 | -0,05902 | 0,887 | 0,915 | 1 |
| Kat8      | 0,005205 | -0,05731 | 0,19  | 0,249 | 1 |
| Cpsf2     | 0,005238 | -0,05373 | 0,222 | 0,288 | 1 |
| Sgpp1     | 0,00526  | -0,07558 | 0,346 | 0,416 | 1 |
| Myof      | 0,005277 | 0,071468 | 0,152 | 0,104 | 1 |
| Rrbp1     | 0,005277 | -0,06542 | 0,953 | 0,969 | 1 |
| Kifc3     | 0,005278 | 0,079559 | 0,324 | 0,263 | 1 |
| Ercc8     | 0,005285 | -0,0519  | 0,153 | 0,207 | 1 |
| Plekhb1   | 0,005324 | 0,099514 | 0,998 | 0,998 | 1 |
| Tmem116   | 0,005329 | -0,01664 | 0,006 | 0,021 | 1 |
| Gm48045   | 0,005329 | -0,01664 | 0,006 | 0,021 | 1 |
| Dusp1     | 0,005361 | 0,268034 | 0,335 | 0,28  | 1 |
| Gm20652   | 0,005377 | 0,020033 | 0,02  | 0,003 | 1 |
| Suclg2    | 0,005392 | -0,02986 | 0,036 | 0,067 | 1 |
| Hmgcr     | 0,005395 | 0,190298 | 0,538 | 0,493 | 1 |
| Mycbp2    | 0,005396 | -0,1041  | 0,895 | 0,889 | 1 |
| Rhbdl2    | 0,005408 | -0,03513 | 0,067 | 0,106 | 1 |

|            |          |          |       |       |   |
|------------|----------|----------|-------|-------|---|
| Pura       | 0,005428 | 0,071702 | 0,969 | 0,961 | 1 |
| Adam23     | 0,005435 | 0,07772  | 0,386 | 0,322 | 1 |
| Mrpl37     | 0,005442 | -0,04199 | 0,16  | 0,218 | 1 |
| Heatr3     | 0,005443 | -0,07367 | 0,526 | 0,576 | 1 |
| Ergic1     | 0,005475 | -0,04108 | 0,132 | 0,184 | 1 |
| Rnaset2a   | 0,005483 | 0,079264 | 0,286 | 0,231 | 1 |
| Pou3f3     | 0,005495 | -0,06936 | 0,834 | 0,881 | 1 |
| 2310022B   | 0,005501 | -0,10093 | 0,789 | 0,803 | 1 |
| Pbx4       | 0,005566 | -0,01096 | 0,002 | 0,013 | 1 |
| Ppp4r2     | 0,005588 | 0,082039 | 0,665 | 0,624 | 1 |
| Kif21b     | 0,005563 | -0,07446 | 0,2   | 0,259 | 1 |
| D5Erttd615 | 0,005669 | -0,01884 | 0,007 | 0,023 | 1 |
| Runx1      | 0,005696 | 0,098374 | 0,093 | 0,055 | 1 |
| B4galt5    | 0,005699 | 0,019669 | 0,023 | 0,005 | 1 |
| Mllt3      | 0,0057   | -0,07143 | 0,188 | 0,242 | 1 |
| Cyld       | 0,005706 | -0,07313 | 0,558 | 0,603 | 1 |
| Tmeff2     | 0,005712 | -0,05404 | 0,969 | 0,977 | 1 |
| Agfg2      | 0,005725 | 0,061885 | 0,21  | 0,156 | 1 |
| Sertad1    | 0,005746 | 0,11612  | 0,206 | 0,156 | 1 |
| 29000110   | 0,00575  | -0,02494 | 0,024 | 0,049 | 1 |
| Renbp      | 0,00576  | 0,03546  | 0,071 | 0,037 | 1 |
| Bcar1      | 0,005824 | 0,114029 | 0,681 | 0,639 | 1 |
| Adora1     | 0,005828 | -0,06778 | 0,633 | 0,678 | 1 |
| Lama2      | 0,005833 | -0,0297  | 0,012 | 0,031 | 1 |
| Itpr1      | 0,005876 | -0,05792 | 0,06  | 0,096 | 1 |
| Gm6712     | 0,005902 | -0,0209  | 0,013 | 0,033 | 1 |
| Pdzrn4     | 0,005904 | -0,0186  | 0,014 | 0,034 | 1 |
| Enoph1     | 0,005919 | -0,08093 | 0,67  | 0,732 | 1 |
| Bod1l      | 0,005965 | -0,06128 | 0,764 | 0,839 | 1 |
| Cipc       | 0,005979 | -0,06573 | 0,833 | 0,873 | 1 |
| Lhfpl3     | 0,005991 | -0,05821 | 0,052 | 0,086 | 1 |
| Frmd8      | 0,006005 | -0,07616 | 0,935 | 0,953 | 1 |
| Olig1      | 0,006009 | -0,07053 | 0,976 | 0,984 | 1 |
| Ppp1r15a   | 0,006065 | 0,121829 | 0,309 | 0,25  | 1 |
| Bzw2       | 0,006066 | -0,06257 | 0,147 | 0,198 | 1 |
| Gm29650    | 0,006066 | -0,02127 | 0,011 | 0,029 | 1 |
| Plat       | 0,006089 | 0,129696 | 0,369 | 0,312 | 1 |
| 1500011B   | 0,006096 | -0,05882 | 0,386 | 0,457 | 1 |
| Luc7l2     | 0,006111 | -0,0773  | 0,958 | 0,967 | 1 |
| Prpf8      | 0,006122 | 0,102331 | 0,577 | 0,535 | 1 |
| Abi2       | 0,00616  | -0,06497 | 0,594 | 0,655 | 1 |
| Ebf1       | 0,006199 | -0,01811 | 0,009 | 0,026 | 1 |
| Apoc1      | 0,006243 | -0,01617 | 0,011 | 0,029 | 1 |
| Gdf11      | 0,006251 | 0,024545 | 0,038 | 0,015 | 1 |
| Serinc5    | 0,006291 | -0,09817 | 0,761 | 0,802 | 1 |
| Pcdhgb2    | 0,006357 | -0,02207 | 0,023 | 0,047 | 1 |
| Ago2       | 0,006363 | -0,0729  | 0,267 | 0,328 | 1 |
| Trim24     | 0,006444 | -0,05912 | 0,358 | 0,424 | 1 |
| Ccdc28a    | 0,006468 | -0,04976 | 0,081 | 0,122 | 1 |
| Mthfs1     | 0,006522 | -0,0628  | 0,448 | 0,517 | 1 |
| Pafah1b2   | 0,00656  | -0,07377 | 0,868 | 0,902 | 1 |
| Ccdc63     | 0,006611 | 0,014921 | 0,016 | 0,002 | 1 |

|           |          |          |       |       |   |
|-----------|----------|----------|-------|-------|---|
| Spsb1     | 0,006669 | 0,082454 | 0,583 | 0,511 | 1 |
| Smim13    | 0,006678 | -0,07853 | 0,473 | 0,538 | 1 |
| Ago3      | 0,006681 | -0,08295 | 0,659 | 0,699 | 1 |
| Ube4a     | 0,006695 | -0,06164 | 0,439 | 0,511 | 1 |
| Pacsin1   | 0,006717 | -0,12313 | 0,399 | 0,452 | 1 |
| Txn1      | 0,006728 | 0,040522 | 0,671 | 0,61  | 1 |
| Zfp365    | 0,006744 | -0,07396 | 0,603 | 0,663 | 1 |
| Pank3     | 0,006777 | 0,117354 | 0,549 | 0,507 | 1 |
| Zfp668    | 0,00679  | -0,0385  | 0,084 | 0,127 | 1 |
| Bmp4      | 0,006795 | 0,04851  | 0,04  | 0,016 | 1 |
| Nedd9     | 0,006812 | -0,04097 | 0,09  | 0,133 | 1 |
| Nsun7     | 0,00683  | -0,02207 | 0,054 | 0,089 | 1 |
| Nptn      | 0,006831 | 0,083919 | 0,714 | 0,667 | 1 |
| 95300590  | 0,006873 | -0,04458 | 0,182 | 0,239 | 1 |
| Fig4      | 0,00692  | -0,04341 | 0,148 | 0,202 | 1 |
| Mpz       | 0,006936 | 0,150921 | 0,012 | 0     | 1 |
| Abcb10    | 0,006946 | -0,08444 | 0,421 | 0,488 | 1 |
| Agpat4    | 0,006952 | -0,04964 | 0,992 | 0,992 | 1 |
| Ktn1      | 0,007009 | -0,0493  | 0,992 | 0,998 | 1 |
| Ccp110    | 0,007041 | -0,10796 | 0,85  | 0,859 | 1 |
| Zfp91     | 0,007056 | -0,05781 | 0,857 | 0,88  | 1 |
| Snx1      | 0,007077 | -0,06714 | 0,846 | 0,865 | 1 |
| Map4k4    | 0,007085 | 0,070905 | 0,988 | 0,985 | 1 |
| Slc35a5   | 0,007115 | -0,06211 | 0,672 | 0,73  | 1 |
| Zfp944    | 0,007143 | -0,0434  | 0,116 | 0,163 | 1 |
| Arhgap25  | 0,007145 | 0,020554 | 0,027 | 0,008 | 1 |
| Efr3b     | 0,007152 | -0,05849 | 0,268 | 0,333 | 1 |
| Fbxl5     | 0,007163 | -0,07266 | 0,795 | 0,844 | 1 |
| Eef1d     | 0,007167 | 0,064915 | 0,945 | 0,927 | 1 |
| Stxbp6    | 0,007186 | -0,0896  | 0,64  | 0,691 | 1 |
| Galnt12   | 0,007195 | -0,03855 | 0,076 | 0,115 | 1 |
| Med21     | 0,00721  | -0,08486 | 0,67  | 0,724 | 1 |
| BC005561  | 0,007231 | -0,08837 | 0,576 | 0,624 | 1 |
| Gigyf1    | 0,007234 | 0,099337 | 0,577 | 0,528 | 1 |
| Gm31105   | 0,007239 | -0,05417 | 0,049 | 0,081 | 1 |
| Evi5l     | 0,00724  | -0,06503 | 0,435 | 0,499 | 1 |
| Specc1l   | 0,007244 | -0,0675  | 0,304 | 0,367 | 1 |
| Gpr37     | 0,007329 | -0,05454 | 0,999 | 0,995 | 1 |
| Sept5     | 0,007335 | -0,01319 | 0,003 | 0,015 | 1 |
| A230057Dl | 0,007365 | -0,05273 | 0,147 | 0,198 | 1 |
| Pin4      | 0,007386 | -0,06879 | 0,655 | 0,714 | 1 |
| Ano8      | 0,007454 | -0,05133 | 0,168 | 0,221 | 1 |
| Psma4     | 0,007479 | -0,06703 | 0,765 | 0,821 | 1 |
| Prkacb    | 0,007538 | -0,05564 | 0,985 | 0,982 | 1 |
| Mynn      | 0,007554 | -0,05624 | 0,282 | 0,343 | 1 |
| Actg1     | 0,007557 | 0,070014 | 0,997 | 0,995 | 1 |
| Ahsa1     | 0,007564 | -0,06223 | 0,772 | 0,837 | 1 |
| Gabpa     | 0,007586 | -0,04374 | 0,235 | 0,299 | 1 |
| Slc13a3   | 0,00759  | -0,07913 | 0,125 | 0,169 | 1 |
| Kat7      | 0,007606 | -0,05361 | 0,376 | 0,441 | 1 |
| Nat8f4    | 0,007631 | -0,02325 | 0,026 | 0,052 | 1 |
| Arntl2    | 0,007674 | 0,017454 | 0,022 | 0,005 | 1 |



|           |          |          |       |       |   |
|-----------|----------|----------|-------|-------|---|
| Pla2g3    | 0,007688 | -0,03091 | 0,019 | 0,041 | 1 |
| Nsun3     | 0,00772  | -0,03345 | 0,041 | 0,072 | 1 |
| Tmem144   | 0,007742 | -0,09906 | 0,617 | 0,672 | 1 |
| Gm48682   | 0,007839 | -0,0256  | 0,031 | 0,059 | 1 |
| Pnpla8    | 0,007878 | -0,05688 | 0,535 | 0,621 | 1 |
| Mboat2    | 0,007886 | 0,083443 | 0,535 | 0,47  | 1 |
| Cept1     | 0,007899 | -0,06881 | 0,564 | 0,613 | 1 |
| Pcdh1     | 0,007937 | -0,05786 | 0,122 | 0,167 | 1 |
| Flna      | 0,007987 | 0,047471 | 0,128 | 0,085 | 1 |
| Riok2     | 0,007994 | -0,04242 | 0,198 | 0,259 | 1 |
| Mif       | 0,008    | -0,07891 | 0,883 | 0,912 | 1 |
| Ank       | 0,008071 | -0,059   | 0,953 | 0,964 | 1 |
| Pop5      | 0,00811  | -0,06846 | 0,53  | 0,587 | 1 |
| Plip      | 0,008134 | 0,066778 | 0,999 | 0,998 | 1 |
| Fam189a2  | 0,008158 | -0,0604  | 0,192 | 0,247 | 1 |
| Zfp788    | 0,008172 | -0,06225 | 0,209 | 0,265 | 1 |
| Gm43597   | 0,008179 | -0,03949 | 0,066 | 0,102 | 1 |
| Cep68     | 0,008179 | -0,04611 | 0,159 | 0,211 | 1 |
| Scaf11    | 0,008206 | -0,06291 | 0,893 | 0,889 | 1 |
| Mrpl21    | 0,008235 | -0,06392 | 0,366 | 0,431 | 1 |
| Rgl1      | 0,008241 | 0,049931 | 0,113 | 0,073 | 1 |
| Rassf2    | 0,008255 | -0,04121 | 0,899 | 0,935 | 1 |
| Tmem263   | 0,008269 | -0,06312 | 0,259 | 0,319 | 1 |
| Prox1     | 0,00829  | -0,07175 | 0,903 | 0,932 | 1 |
| Zfp444    | 0,008301 | -0,03731 | 0,143 | 0,195 | 1 |
| 2900060B: | 0,008349 | 0,034042 | 0,058 | 0,029 | 1 |
| Acsf2     | 0,008372 | -0,03999 | 0,076 | 0,114 | 1 |
| Adam22    | 0,0084   | -0,07015 | 0,46  | 0,519 | 1 |
| Rpia      | 0,008408 | 0,069707 | 0,292 | 0,236 | 1 |
| Rnf125    | 0,008448 | -0,04107 | 0,049 | 0,081 | 1 |
| 2310005A: | 0,008542 | -0,00873 | 0,001 | 0,01  | 1 |
| Gm44672   | 0,008542 | -0,00873 | 0,001 | 0,01  | 1 |
| Astn2     | 0,008542 | 0,047114 | 0,077 | 0,044 | 1 |
| Alad      | 0,008583 | -0,05229 | 0,213 | 0,27  | 1 |
| Ppp2r2b   | 0,00859  | -0,02664 | 0,017 | 0,037 | 1 |
| Erlec1    | 0,008611 | -0,0546  | 0,399 | 0,468 | 1 |
| Cacna1a   | 0,008623 | -0,04801 | 0,074 | 0,111 | 1 |
| Gm16168   | 0,008639 | -0,0517  | 0,159 | 0,21  | 1 |
| Trove2    | 0,008643 | -0,05872 | 0,625 | 0,685 | 1 |
| Afap1l2   | 0,00866  | 0,034042 | 0,034 | 0,013 | 1 |
| Mmd2      | 0,008681 | -0,06515 | 0,282 | 0,345 | 1 |
| Bfsp2     | 0,008685 | -0,11175 | 0,548 | 0,61  | 1 |
| Cnp       | 0,00869  | 0,039132 | 1     | 1     | 1 |
| Pqlc3     | 0,008758 | 0,029227 | 0,123 | 0,08  | 1 |
| Gbf1      | 0,008826 | -0,05371 | 0,371 | 0,442 | 1 |
| Cdip1     | 0,008855 | -0,07119 | 0,831 | 0,878 | 1 |
| Eml5      | 0,008859 | -0,07667 | 0,187 | 0,237 | 1 |
| Prkar1b   | 0,008877 | -0,02393 | 0,03  | 0,057 | 1 |
| Clvs1     | 0,008886 | -0,00928 | 0,004 | 0,016 | 1 |
| Abca2     | 0,008888 | 0,0766   | 0,998 | 0,998 | 1 |
| Appl1     | 0,008898 | 0,092959 | 0,685 | 0,647 | 1 |
| lqgap1    | 0,008938 | 0,074544 | 0,331 | 0,272 | 1 |

|           |          |          |       |       |   |
|-----------|----------|----------|-------|-------|---|
| Smap1     | 0,008949 | -0,05427 | 0,605 | 0,683 | 1 |
| Atp6v1e1  | 0,008967 | -0,05683 | 0,92  | 0,938 | 1 |
| Dnajc16   | 0,009007 | -0,05229 | 0,199 | 0,255 | 1 |
| Wdr41     | 0,009024 | -0,05464 | 0,268 | 0,328 | 1 |
| Fscn1     | 0,009024 | -0,06774 | 0,934 | 0,958 | 1 |
| Clcn3     | 0,009077 | -0,05493 | 0,961 | 0,982 | 1 |
| Rbpjl     | 0,00912  | 0,054012 | 0,104 | 0,067 | 1 |
| Zswim1    | 0,009153 | -0,03192 | 0,087 | 0,128 | 1 |
| Gpr153    | 0,009179 | 0,020695 | 0,015 | 0,002 | 1 |
| Serpine1  | 0,009179 | 0,026437 | 0,015 | 0,002 | 1 |
| Mdc1      | 0,0092   | -0,03628 | 0,245 | 0,312 | 1 |
| Gm45716   | 0,009212 | 0,018774 | 0,015 | 0,002 | 1 |
| Rab3gap2  | 0,009256 | -0,07254 | 0,422 | 0,483 | 1 |
| Fbxo2     | 0,00927  | -0,10601 | 0,451 | 0,506 | 1 |
| Stambp    | 0,009291 | -0,0917  | 0,544 | 0,597 | 1 |
| Rps5      | 0,009306 | 0,064929 | 0,987 | 0,984 | 1 |
| Scyl3     | 0,009313 | -0,04258 | 0,153 | 0,203 | 1 |
| Zw10      | 0,009315 | -0,04344 | 0,167 | 0,22  | 1 |
| Bcl3      | 0,009321 | 0,054229 | 0,09  | 0,055 | 1 |
| Cdh6      | 0,009321 | -0,05696 | 0,16  | 0,213 | 1 |
| Pcdhga8   | 0,009325 | -0,02429 | 0,029 | 0,055 | 1 |
| Oxct1     | 0,009345 | -0,08345 | 0,639 | 0,693 | 1 |
| Aga       | 0,009357 | -0,07417 | 0,304 | 0,363 | 1 |
| Gm45620   | 0,009417 | -0,01824 | 0,016 | 0,036 | 1 |
| Stk3      | 0,009467 | -0,05872 | 0,191 | 0,246 | 1 |
| Fam131b   | 0,009493 | -0,0778  | 0,597 | 0,634 | 1 |
| Psap      | 0,009515 | 0,062573 | 0,999 | 1     | 1 |
| Ctsd      | 0,009515 | 0,063975 | 0,985 | 0,982 | 1 |
| Fbxo8     | 0,009541 | -0,04994 | 0,396 | 0,47  | 1 |
| Rnf122    | 0,009548 | 0,174117 | 0,447 | 0,405 | 1 |
| Abhd5     | 0,009653 | -0,062   | 0,625 | 0,667 | 1 |
| Emc2      | 0,009661 | -0,0542  | 0,522 | 0,597 | 1 |
| Flnb      | 0,00968  | 0,05929  | 0,524 | 0,457 | 1 |
| Tmem106k  | 0,009681 | -0,05349 | 0,773 | 0,836 | 1 |
| Lmbrd1    | 0,009749 | -0,05758 | 0,974 | 0,967 | 1 |
| Nes       | 0,009762 | 0,020399 | 0,011 | 0     | 1 |
| Mrpl50    | 0,009804 | -0,05649 | 0,29  | 0,353 | 1 |
| S100b     | 0,009806 | 0,036725 | 0,852 | 0,795 | 1 |
| Snrpn     | 0,009821 | -0,045   | 0,767 | 0,821 | 1 |
| mt-Atp8   | 0,009913 | -0,05532 | 0,959 | 0,971 | 1 |
| Ywhaz     | 0,009918 | 0,079217 | 0,974 | 0,969 | 1 |
| Rab10os   | 0,009943 | -0,06355 | 0,37  | 0,436 | 1 |
| 2610008E1 | 0,009951 | -0,04225 | 0,287 | 0,356 | 1 |
| Chml      | 0,00999  | 0,041349 | 0,09  | 0,055 | 1 |
| Ankrd45   | 0,009991 | -0,00648 | 0     | 0,007 | 1 |
| S1pr1     | 0,009991 | -0,00648 | 0     | 0,007 | 1 |
| Rims3     | 0,009991 | -0,00648 | 0     | 0,007 | 1 |
| Arl9      | 0,009991 | -0,00648 | 0     | 0,007 | 1 |
| Actl6b    | 0,009991 | -0,00648 | 0     | 0,007 | 1 |
| Ptpro     | 0,009991 | -0,00648 | 0     | 0,007 | 1 |
| Ubap1l    | 0,009991 | -0,00648 | 0     | 0,007 | 1 |
| Ccdc36    | 0,009991 | -0,00648 | 0     | 0,007 | 1 |

|           |          |          |       |       |   |
|-----------|----------|----------|-------|-------|---|
| Hrh2      | 0,009991 | -0,00648 | 0     | 0,007 | 1 |
| 3300002A: | 0,009991 | -0,00648 | 0     | 0,007 | 1 |
| Pde1b     | 0,009991 | -0,00648 | 0     | 0,007 | 1 |
| Gm10532   | 0,009991 | -0,00648 | 0     | 0,007 | 1 |
| D930019O  | 0,009991 | -0,0081  | 0     | 0,007 | 1 |
| 1810012K: | 0,009991 | -0,0081  | 0     | 0,007 | 1 |
| Batf2     | 0,009991 | -0,00971 | 0     | 0,007 | 1 |
| 2010300C: | 0,009991 | -0,01132 | 0     | 0,007 | 1 |
| Ggct      | 0,009999 | -0,08004 | 0,427 | 0,489 | 1 |
| Acot6     | 0,010008 | -0,04951 | 0,119 | 0,163 | 1 |
| Nat10     | 0,010031 | -0,04329 | 0,125 | 0,171 | 1 |
| Vac14     | 0,01006  | -0,05614 | 0,201 | 0,257 | 1 |
| Gm20449   | 0,010073 | -0,01088 | 0,005 | 0,018 | 1 |
| Ksr1      | 0,010075 | -0,0638  | 0,233 | 0,288 | 1 |
| Edem1     | 0,010084 | -0,05968 | 0,289 | 0,351 | 1 |
| Dct       | 0,010104 | -0,10369 | 0,033 | 0,06  | 1 |
| Mettl7a1  | 0,010117 | -0,07818 | 0,67  | 0,717 | 1 |
| Slco3a1   | 0,010118 | -0,08026 | 0,964 | 0,945 | 1 |
| Cdan1     | 0,010124 | -0,06251 | 0,219 | 0,275 | 1 |
| Lrig1     | 0,010146 | -0,04212 | 0,08  | 0,119 | 1 |
| Atg9a     | 0,010271 | -0,06022 | 0,352 | 0,415 | 1 |
| Iigp1     | 0,010327 | -0,11663 | 0,006 | 0,02  | 1 |
| Amd2      | 0,01034  | 0,100085 | 0,825 | 0,777 | 1 |
| Dusp23    | 0,010386 | -0,05127 | 0,181 | 0,234 | 1 |
| Tmem220   | 0,010406 | 0,036587 | 0,09  | 0,055 | 1 |
| Plgrkt    | 0,01042  | -0,06859 | 0,289 | 0,348 | 1 |
| Zfhx4     | 0,010457 | -0,06383 | 0,383 | 0,452 | 1 |
| Phyhipl   | 0,010459 | 0,082798 | 0,968 | 0,956 | 1 |
| Stk19     | 0,010467 | -0,05816 | 0,347 | 0,405 | 1 |
| Arhgap32  | 0,010489 | -0,07427 | 0,366 | 0,421 | 1 |
| Rtp4      | 0,010513 | -0,05913 | 0,048 | 0,078 | 1 |
| Rcbtb1    | 0,010524 | -0,0738  | 0,918 | 0,925 | 1 |
| Zfp938    | 0,010539 | -0,05775 | 0,167 | 0,216 | 1 |
| Ehd3      | 0,010543 | -0,05598 | 0,263 | 0,32  | 1 |
| Ly6h      | 0,01056  | -0,01505 | 0,006 | 0,02  | 1 |
| Mif4gd    | 0,01059  | 0,076845 | 0,614 | 0,574 | 1 |
| Sall4     | 0,010615 | -0,01566 | 0,006 | 0,02  | 1 |
| Reep4     | 0,010619 | -0,03744 | 0,088 | 0,128 | 1 |
| Ell2      | 0,010713 | -0,05264 | 0,43  | 0,494 | 1 |
| Ano4      | 0,010717 | -0,07738 | 0,63  | 0,681 | 1 |
| N4bp2l1   | 0,01073  | -0,04268 | 0,127 | 0,174 | 1 |
| Fgfr1op   | 0,010735 | -0,05212 | 0,13  | 0,176 | 1 |
| Riox2     | 0,010754 | -0,04093 | 0,104 | 0,146 | 1 |
| Cops2     | 0,010772 | -0,07764 | 0,588 | 0,633 | 1 |
| Nr1d2     | 0,010775 | -0,04793 | 0,244 | 0,304 | 1 |
| Ncor2     | 0,010775 | 0,088264 | 0,474 | 0,428 | 1 |
| Ap3b2     | 0,01081  | -0,05631 | 0,327 | 0,389 | 1 |
| Abtb1     | 0,010813 | -0,05274 | 0,202 | 0,255 | 1 |
| Limd2     | 0,010836 | -0,0115  | 0,006 | 0,02  | 1 |
| Acsl1     | 0,01087  | -0,0787  | 0,706 | 0,75  | 1 |
| Dact3     | 0,010884 | 0,078432 | 0,773 | 0,741 | 1 |
| Csnk2b    | 0,010944 | -0,06008 | 0,762 | 0,782 | 1 |

|          |          |          |       |       |   |
|----------|----------|----------|-------|-------|---|
| Hip1r    | 0,010946 | 0,10815  | 0,523 | 0,481 | 1 |
| Uqcrc1   | 0,010989 | -0,04716 | 0,816 | 0,868 | 1 |
| Gstp2    | 0,011004 | 0,073917 | 0,095 | 0,06  | 1 |
| Ccdc187  | 0,011034 | -0,05809 | 0,139 | 0,185 | 1 |
| 6530409C | 0,011065 | -0,03422 | 0,066 | 0,101 | 1 |
| Phf3     | 0,011122 | -0,03907 | 0,836 | 0,883 | 1 |
| Sptan1   | 0,011125 | 0,077971 | 0,496 | 0,426 | 1 |
| 1700020D | 0,011125 | -0,0224  | 0,032 | 0,059 | 1 |
| Kif17    | 0,011113 | -0,01469 | 0,007 | 0,021 | 1 |
| Dynll2   | 0,011132 | 0,113761 | 0,812 | 0,79  | 1 |
| Hecw2    | 0,011149 | -0,08743 | 0,535 | 0,595 | 1 |
| Ppp1r12b | 0,011162 | -0,06243 | 0,213 | 0,267 | 1 |
| Chgb     | 0,011167 | -0,01786 | 0,008 | 0,023 | 1 |
| Ifit1    | 0,011178 | -0,05405 | 0,011 | 0,028 | 1 |
| Cacna2d1 | 0,011185 | -0,02224 | 0,008 | 0,023 | 1 |
| Galnt13  | 0,011193 | -0,0131  | 0,007 | 0,021 | 1 |
| Ttll9    | 0,011123 | -0,0153  | 0,007 | 0,021 | 1 |
| Tdrd9    | 0,011236 | -0,01786 | 0,008 | 0,023 | 1 |
| Rfx7     | 0,011239 | -0,0667  | 0,275 | 0,333 | 1 |
| Vps36    | 0,011246 | -0,05278 | 0,328 | 0,392 | 1 |
| Ngfr     | 0,011252 | 0,080122 | 0,156 | 0,114 | 1 |
| Agmo     | 0,011284 | -0,07653 | 0,341 | 0,403 | 1 |
| Car3     | 0,011315 | -0,02171 | 0,021 | 0,042 | 1 |
| Atp6ap2  | 0,011132 | 0,076537 | 0,953 | 0,93  | 1 |
| Sowaha   | 0,011323 | -0,06378 | 0,282 | 0,343 | 1 |
| Hdlbp    | 0,011342 | -0,0521  | 0,662 | 0,725 | 1 |
| Slc7a1   | 0,011344 | 0,03627  | 0,052 | 0,026 | 1 |
| AC160336 | 0,011348 | 0,083836 | 0,873 | 0,839 | 1 |
| Ccng1    | 0,011354 | -0,06463 | 0,322 | 0,379 | 1 |
| Nexmif   | 0,011362 | -0,01981 | 0,009 | 0,024 | 1 |
| Bivm     | 0,011386 | -0,04446 | 0,096 | 0,137 | 1 |
| Qtrt2    | 0,011463 | -0,03665 | 0,121 | 0,166 | 1 |
| Rassf4   | 0,011478 | -0,06386 | 0,219 | 0,275 | 1 |
| Map6     | 0,011525 | 0,101181 | 0,528 | 0,48  | 1 |
| Irs2     | 0,011574 | -0,03847 | 0,788 | 0,844 | 1 |
| Yipf4    | 0,011576 | -0,05175 | 0,707 | 0,785 | 1 |
| Mrps14   | 0,011614 | -0,06368 | 0,41  | 0,472 | 1 |
| Nde1     | 0,011622 | -0,047   | 0,599 | 0,668 | 1 |
| Loxl2    | 0,011631 | -0,03987 | 0,03  | 0,055 | 1 |
| Appbp2   | 0,011658 | -0,05338 | 0,826 | 0,881 | 1 |
| Aldh1l1  | 0,011684 | -0,0274  | 0,036 | 0,063 | 1 |
| Tia1     | 0,011735 | -0,07433 | 0,646 | 0,702 | 1 |
| Cct7     | 0,011735 | -0,05634 | 0,912 | 0,924 | 1 |
| Slc35e1  | 0,011176 | -0,07006 | 0,214 | 0,263 | 1 |
| Zeb2     | 0,011766 | 0,068723 | 0,999 | 1     | 1 |
| Rtl8a    | 0,011773 | 0,080215 | 0,902 | 0,868 | 1 |
| Ext1     | 0,011873 | -0,03726 | 0,152 | 0,203 | 1 |
| Wfdc18   | 0,011875 | -0,10852 | 0,201 | 0,252 | 1 |
| Pbx3     | 0,011191 | -0,05776 | 0,363 | 0,428 | 1 |
| Fbxo18   | 0,011936 | -0,04    | 0,201 | 0,257 | 1 |
| Lyar     | 0,011953 | -0,0472  | 0,199 | 0,252 | 1 |
| Kctd3    | 0,011974 | -0,04835 | 0,809 | 0,847 | 1 |

|           |          |          |       |       |   |
|-----------|----------|----------|-------|-------|---|
| Cars      | 0,011987 | -0,04614 | 0,202 | 0,254 | 1 |
| Crbn      | 0,012009 | -0,05832 | 0,395 | 0,46  | 1 |
| Apbb1     | 0,012011 | -0,07972 | 0,947 | 0,964 | 1 |
| Dopey1    | 0,012029 | -0,0801  | 0,443 | 0,496 | 1 |
| 2410089EC | 0,012078 | -0,05801 | 0,337 | 0,405 | 1 |
| Maob      | 0,012135 | -0,05904 | 0,13  | 0,174 | 1 |
| Cdh11     | 0,012138 | -0,03806 | 0,651 | 0,732 | 1 |
| Alcam     | 0,012139 | -0,07638 | 0,673 | 0,715 | 1 |
| Nsa2      | 0,01214  | -0,05825 | 0,713 | 0,777 | 1 |
| Lancl1    | 0,012175 | -0,05444 | 0,508 | 0,567 | 1 |
| Dnajc24   | 0,012176 | -0,08753 | 0,602 | 0,629 | 1 |
| Asb7      | 0,012226 | -0,04085 | 0,241 | 0,301 | 1 |
| 2810403A  | 0,012233 | -0,05814 | 0,298 | 0,363 | 1 |
| Slc25a16  | 0,012306 | -0,04902 | 0,187 | 0,239 | 1 |
| Abca6     | 0,012313 | -0,04851 | 0,124 | 0,167 | 1 |
| Tpp2      | 0,012343 | -0,0558  | 0,311 | 0,372 | 1 |
| Mtf1      | 0,01235  | -0,062   | 0,512 | 0,576 | 1 |
| Klh17     | 0,012376 | -0,04516 | 0,198 | 0,252 | 1 |
| Csrnp2    | 0,012439 | 0,038309 | 0,075 | 0,044 | 1 |
| Mrpl34    | 0,012463 | -0,05957 | 0,535 | 0,6   | 1 |
| Usp25     | 0,01248  | -0,08117 | 0,572 | 0,602 | 1 |
| Atl3      | 0,012495 | -0,05935 | 0,377 | 0,436 | 1 |
| Shisa5    | 0,012524 | -0,04278 | 0,128 | 0,174 | 1 |
| Lsm8      | 0,012557 | -0,05711 | 0,447 | 0,512 | 1 |
| Trim32    | 0,012575 | -0,05117 | 0,302 | 0,364 | 1 |
| Swsap1    | 0,012581 | -0,02834 | 0,04  | 0,068 | 1 |
| Tmem25    | 0,012604 | 0,028967 | 0,067 | 0,037 | 1 |
| Hba-a1    | 0,012611 | 1,78626  | 0,04  | 0,018 | 1 |
| Efhd1     | 0,012619 | -0,06856 | 0,88  | 0,896 | 1 |
| Cnpy2     | 0,012623 | -0,06572 | 0,608 | 0,66  | 1 |
| Smco3     | 0,01263  | -0,07322 | 0,565 | 0,615 | 1 |
| Esd       | 0,012636 | -0,05337 | 0,626 | 0,694 | 1 |
| Robo2     | 0,012639 | -0,01417 | 0,002 | 0,011 | 1 |
| Malat1    | 0,012645 | 0,03176  | 0,998 | 1     | 1 |
| Zranb3    | 0,012681 | -0,03643 | 0,052 | 0,083 | 1 |
| Lpin3     | 0,012699 | -0,01096 | 0,002 | 0,011 | 1 |
| Efemp2    | 0,012699 | -0,01096 | 0,002 | 0,011 | 1 |
| Zfand3    | 0,012705 | -0,04863 | 0,43  | 0,507 | 1 |
| Aak1      | 0,012706 | -0,05024 | 0,358 | 0,426 | 1 |
| Casc4     | 0,012716 | -0,08821 | 0,265 | 0,314 | 1 |
| Aass      | 0,012729 | -0,00936 | 0,002 | 0,011 | 1 |
| Ebf3      | 0,012729 | -0,00936 | 0,002 | 0,011 | 1 |
| Ifitm2    | 0,012729 | -0,00936 | 0,002 | 0,011 | 1 |
| Bco2      | 0,012729 | -0,00936 | 0,002 | 0,011 | 1 |
| Pnmal1    | 0,012787 | -0,05448 | 0,096 | 0,135 | 1 |
| Mad2l2    | 0,012799 | -0,0569  | 0,236 | 0,291 | 1 |
| Selenop   | 0,012816 | -0,10941 | 0,896 | 0,92  | 1 |
| Gnb5      | 0,012822 | -0,03947 | 0,144 | 0,192 | 1 |
| Adgrg1    | 0,012834 | 0,076648 | 0,177 | 0,132 | 1 |
| Gkap1     | 0,012899 | -0,06663 | 0,82  | 0,854 | 1 |
| Ptpra     | 0,012916 | -0,05776 | 0,955 | 0,948 | 1 |
| Gm21887   | 0,012933 | 0,029235 | 0,071 | 0,041 | 1 |

|          |          |          |       |       |   |
|----------|----------|----------|-------|-------|---|
| Sash1    | 0,012937 | -0,08591 | 0,751 | 0,769 | 1 |
| Ttc32    | 0,012949 | -0,03662 | 0,133 | 0,18  | 1 |
| Dpp9     | 0,012963 | -0,05017 | 0,241 | 0,298 | 1 |
| Oma1     | 0,013025 | -0,04515 | 0,17  | 0,22  | 1 |
| Siah2    | 0,013043 | -0,07016 | 0,369 | 0,433 | 1 |
| Litaf    | 0,013044 | -0,06305 | 0,991 | 0,993 | 1 |
| Ap5m1    | 0,013154 | -0,06849 | 0,241 | 0,293 | 1 |
| Ccdc28b  | 0,013197 | -0,05743 | 0,328 | 0,389 | 1 |
| Rsad2    | 0,013287 | -0,03249 | 0,018 | 0,037 | 1 |
| Slmap    | 0,013301 | -0,05118 | 0,257 | 0,315 | 1 |
| Prkcb    | 0,013347 | 0,072477 | 0,381 | 0,325 | 1 |
| Tepsin   | 0,013352 | -0,03495 | 0,075 | 0,111 | 1 |
| Fam46a   | 0,013378 | -0,11315 | 0,267 | 0,322 | 1 |
| Uckl1os  | 0,013414 | 0,022742 | 0,03  | 0,011 | 1 |
| Irf7     | 0,013422 | -0,04558 | 0,024 | 0,046 | 1 |
| Cfl2     | 0,013481 | 0,07103  | 0,986 | 0,982 | 1 |
| Cep85l   | 0,013496 | -0,05052 | 0,205 | 0,26  | 1 |
| Fam13c   | 0,013525 | 0,12097  | 0,639 | 0,603 | 1 |
| Etv5     | 0,013568 | -0,01876 | 0,054 | 0,086 | 1 |
| Gatad2b  | 0,013606 | -0,03166 | 0,773 | 0,821 | 1 |
| Med26    | 0,013741 | 0,03507  | 0,084 | 0,052 | 1 |
| Mpeg1    | 0,013775 | 0,012677 | 0,01  | 0     | 1 |
| Grm8     | 0,013775 | 0,010737 | 0,01  | 0     | 1 |
| Osbpl3   | 0,013775 | 0,011707 | 0,01  | 0     | 1 |
| Oprk1    | 0,013775 | 0,01558  | 0,01  | 0     | 1 |
| Tox4     | 0,0138   | -0,05133 | 0,464 | 0,53  | 1 |
| Cdkl5    | 0,013802 | -0,07847 | 0,504 | 0,548 | 1 |
| BC004004 | 0,013827 | -0,06051 | 0,511 | 0,58  | 1 |
| Ube2n    | 0,013832 | -0,05963 | 0,808 | 0,85  | 1 |
| Dimt1    | 0,013861 | -0,04496 | 0,2   | 0,254 | 1 |
| Abcc1    | 0,013893 | -0,04869 | 0,199 | 0,25  | 1 |
| Ptcd3    | 0,013904 | -0,06105 | 0,247 | 0,302 | 1 |
| Chn2     | 0,013905 | -0,06027 | 0,881 | 0,914 | 1 |
| March5   | 0,01394  | -0,0704  | 0,508 | 0,554 | 1 |
| Pcnx4    | 0,013944 | -0,05112 | 0,186 | 0,236 | 1 |
| Sept9    | 0,013965 | 0,088109 | 0,296 | 0,244 | 1 |
| Ahsa2    | 0,014038 | -0,0645  | 0,436 | 0,491 | 1 |
| Ncstn    | 0,01408  | -0,05802 | 0,265 | 0,32  | 1 |
| Pgk1     | 0,014116 | -0,04799 | 0,792 | 0,846 | 1 |
| Sh2b1    | 0,01412  | -0,05011 | 0,258 | 0,315 | 1 |
| Gm48899  | 0,014164 | 0,014263 | 0,017 | 0,003 | 1 |
| Hivep2   | 0,014183 | -0,04965 | 0,076 | 0,111 | 1 |
| Dglucy   | 0,014188 | 0,016494 | 0,02  | 0,005 | 1 |
| Btf3l4   | 0,01433  | -0,04926 | 0,185 | 0,234 | 1 |
| Gm12279  | 0,014337 | 0,013608 | 0,017 | 0,003 | 1 |
| Dnmt1    | 0,014337 | -0,06145 | 0,269 | 0,325 | 1 |
| Nectin3  | 0,014388 | -0,03278 | 0,138 | 0,185 | 1 |
| Baalc    | 0,014422 | -0,02137 | 0,017 | 0,036 | 1 |
| Zfp976   | 0,014454 | -0,03385 | 0,055 | 0,086 | 1 |
| Mras     | 0,014594 | -0,02271 | 0,127 | 0,172 | 1 |
| Sept4    | 0,01461  | -0,05797 | 0,998 | 0,997 | 1 |
| Smarcd1  | 0,014633 | -0,04185 | 0,854 | 0,886 | 1 |

|          |          |          |       |       |   |
|----------|----------|----------|-------|-------|---|
| Map2k2   | 0,014653 | -0,0568  | 0,849 | 0,873 | 1 |
| Scpep1   | 0,014659 | 0,056914 | 0,244 | 0,193 | 1 |
| Ndufa10  | 0,014662 | -0,05204 | 0,799 | 0,86  | 1 |
| Fgf1     | 0,014717 | -0,09144 | 0,647 | 0,665 | 1 |
| M santd3 | 0,01474  | -0,03962 | 0,123 | 0,166 | 1 |
| Sephs1   | 0,014755 | -0,04876 | 0,173 | 0,221 | 1 |
| Ccdc173  | 0,014763 | -0,03619 | 0,08  | 0,117 | 1 |
| Clic4    | 0,014789 | 0,063184 | 0,986 | 0,997 | 1 |
| Usp46    | 0,014792 | 0,07401  | 0,289 | 0,239 | 1 |
| Glce     | 0,014811 | 0,021781 | 0,051 | 0,026 | 1 |
| Gm49085  | 0,014812 | 0,024062 | 0,027 | 0,01  | 1 |
| Klhl24   | 0,014839 | -0,0641  | 0,704 | 0,766 | 1 |
| Col9a1   | 0,014854 | -0,03644 | 0,046 | 0,075 | 1 |
| Anln     | 0,014869 | -0,08876 | 0,96  | 0,959 | 1 |
| Uhmk1    | 0,014881 | -0,06688 | 0,403 | 0,468 | 1 |
| Polr1a   | 0,015055 | -0,05209 | 0,217 | 0,27  | 1 |
| Nrf1     | 0,015077 | -0,03041 | 0,195 | 0,25  | 1 |
| Gm36855  | 0,015083 | -0,05506 | 0,119 | 0,161 | 1 |
| Snrpd3   | 0,01522  | -0,04553 | 0,739 | 0,776 | 1 |
| Zfp7     | 0,015225 | -0,02567 | 0,033 | 0,059 | 1 |
| Rab32    | 0,015228 | 0,017698 | 0,027 | 0,01  | 1 |
| Foxn2    | 0,015235 | -0,03616 | 0,395 | 0,476 | 1 |
| Tlk2     | 0,015258 | -0,06512 | 0,375 | 0,437 | 1 |
| Cenpb    | 0,015282 | 0,089395 | 0,528 | 0,48  | 1 |
| Rpl10    | 0,015283 | 0,073674 | 0,981 | 0,984 | 1 |
| Gpd1     | 0,015337 | -0,07807 | 0,603 | 0,66  | 1 |
| Dubr     | 0,015358 | -0,06495 | 0,262 | 0,319 | 1 |
| Gm44763  | 0,015393 | -0,02294 | 0,043 | 0,072 | 1 |
| Syne3    | 0,015401 | -0,04755 | 0,101 | 0,14  | 1 |
| Paox     | 0,01543  | -0,04535 | 0,114 | 0,154 | 1 |
| Atg14    | 0,015453 | -0,04764 | 0,237 | 0,291 | 1 |
| Crat     | 0,015459 | -0,06849 | 0,264 | 0,314 | 1 |
| Adamts6  | 0,015527 | -0,02772 | 0,05  | 0,08  | 1 |
| Aurka    | 0,015533 | -0,01945 | 0,016 | 0,034 | 1 |
| Tjp1     | 0,01557  | -0,07759 | 0,688 | 0,74  | 1 |
| Tra2a    | 0,015573 | -0,06142 | 0,924 | 0,95  | 1 |
| Fam169a  | 0,015627 | -0,0233  | 0,015 | 0,033 | 1 |
| Lrrc45   | 0,015665 | -0,03495 | 0,185 | 0,237 | 1 |
| Cbl      | 0,01567  | -0,06416 | 0,594 | 0,659 | 1 |
| Rbm34    | 0,015711 | -0,05084 | 0,324 | 0,385 | 1 |
| Slc25a44 | 0,015716 | -0,04584 | 0,381 | 0,447 | 1 |
| Cwf19l2  | 0,015736 | -0,06576 | 0,478 | 0,533 | 1 |
| Ptprz1   | 0,015748 | -0,02486 | 0,015 | 0,033 | 1 |
| Sirt1    | 0,015838 | 0,065793 | 0,332 | 0,276 | 1 |
| Ly6g6f   | 0,015874 | 0,087636 | 0,41  | 0,363 | 1 |
| Tead1    | 0,015887 | 0,075597 | 0,138 | 0,099 | 1 |
| Elmo2    | 0,015893 | -0,06049 | 0,204 | 0,252 | 1 |
| Rbm46    | 0,015939 | -0,01319 | 0,003 | 0,013 | 1 |
| Stip1    | 0,016001 | -0,06887 | 0,633 | 0,676 | 1 |
| Zfp583   | 0,016018 | 0,033126 | 0,059 | 0,033 | 1 |
| Tsc22d3  | 0,016026 | -0,08989 | 0,486 | 0,532 | 1 |
| Gm816    | 0,01603  | -0,02582 | 0,032 | 0,057 | 1 |

|           |          |          |       |       |   |
|-----------|----------|----------|-------|-------|---|
| Csrp2     | 0,016041 | 0,03126  | 0,048 | 0,024 | 1 |
| Plppr3    | 0,016043 | 0,038014 | 0,074 | 0,044 | 1 |
| Arvcf     | 0,016062 | -0,03585 | 0,082 | 0,119 | 1 |
| Arhgap44  | 0,016124 | -0,00901 | 0,003 | 0,013 | 1 |
| Tmem30a   | 0,016125 | -0,05171 | 0,985 | 0,993 | 1 |
| Hivep3    | 0,016139 | 0,098118 | 0,402 | 0,346 | 1 |
| Rae1      | 0,016151 | -0,05603 | 0,284 | 0,338 | 1 |
| Slc9a9    | 0,016226 | -0,0482  | 0,204 | 0,257 | 1 |
| Gpbp1     | 0,016256 | 0,056791 | 0,628 | 0,577 | 1 |
| Grm7      | 0,016326 | -0,05771 | 0,103 | 0,141 | 1 |
| Pdgfc     | 0,016343 | -0,031   | 0,041 | 0,068 | 1 |
| Babam2    | 0,016377 | -0,05506 | 0,444 | 0,514 | 1 |
| Acad12    | 0,016397 | -0,03565 | 0,103 | 0,143 | 1 |
| Ranbp6    | 0,016445 | -0,04556 | 0,18  | 0,229 | 1 |
| Sike1     | 0,016485 | -0,05297 | 0,396 | 0,467 | 1 |
| Sdk2      | 0,016533 | -0,04186 | 0,076 | 0,111 | 1 |
| Cadm1     | 0,016603 | -0,04655 | 0,767 | 0,803 | 1 |
| Gtf2a1    | 0,01661  | 0,08254  | 0,726 | 0,696 | 1 |
| Rpl18     | 0,016614 | 0,053071 | 0,993 | 0,993 | 1 |
| Nacc1     | 0,016614 | -0,0603  | 0,282 | 0,335 | 1 |
| Tmbim1    | 0,016724 | -0,05118 | 0,989 | 0,99  | 1 |
| Urb2      | 0,016724 | 0,035969 | 0,079 | 0,049 | 1 |
| Gucy1a1   | 0,016736 | -0,02053 | 0,014 | 0,031 | 1 |
| Rps11     | 0,016839 | 0,057469 | 0,991 | 0,985 | 1 |
| Parp9     | 0,016876 | -0,02303 | 0,015 | 0,033 | 1 |
| Chordc1   | 0,016884 | -0,05778 | 0,573 | 0,634 | 1 |
| Gm46218   | 0,016907 | -0,0446  | 0,08  | 0,115 | 1 |
| Spats1    | 0,016908 | -0,02924 | 0,031 | 0,055 | 1 |
| Cntn1     | 0,016919 | -0,07646 | 0,086 | 0,122 | 1 |
| Zfp526    | 0,01692  | 0,016443 | 0,025 | 0,008 | 1 |
| Nqo1      | 0,016937 | -0,06901 | 0,116 | 0,154 | 1 |
| St6gal1   | 0,016958 | 0,063614 | 0,436 | 0,376 | 1 |
| Utp20     | 0,01696  | -0,05575 | 0,13  | 0,171 | 1 |
| Strada    | 0,016961 | -0,05581 | 0,162 | 0,207 | 1 |
| Uhrf1bp1  | 0,016971 | -0,03241 | 0,072 | 0,106 | 1 |
| Rusc2     | 0,017031 | 0,085467 | 0,563 | 0,517 | 1 |
| Pdpr      | 0,017079 | -0,02994 | 0,118 | 0,161 | 1 |
| Entpd5    | 0,017093 | -0,06848 | 0,546 | 0,598 | 1 |
| Pla2g4a   | 0,017136 | -0,06166 | 0,356 | 0,413 | 1 |
| Psen1     | 0,017156 | -0,05359 | 0,513 | 0,572 | 1 |
| Ncdn      | 0,017162 | -0,06512 | 0,575 | 0,618 | 1 |
| AC129328. | 0,017168 | -0,0246  | 0,058 | 0,089 | 1 |
| Lap3      | 0,017182 | -0,05983 | 0,97  | 0,966 | 1 |
| Pphln1    | 0,017278 | -0,07051 | 0,261 | 0,311 | 1 |
| Cntrl     | 0,017322 | -0,04445 | 0,35  | 0,421 | 1 |
| Scrn1     | 0,017323 | 0,08829  | 0,471 | 0,426 | 1 |
| Fgfr1     | 0,017332 | -0,07431 | 0,339 | 0,4   | 1 |
| Cby1      | 0,017356 | -0,05362 | 0,253 | 0,306 | 1 |
| Cd47      | 0,017398 | -0,05424 | 0,985 | 0,995 | 1 |
| Itgb5     | 0,017426 | -0,05054 | 0,427 | 0,498 | 1 |
| Ppp2r2a   | 0,017479 | 0,068992 | 0,966 | 0,956 | 1 |
| Epb41l4b  | 0,017483 | -0,07531 | 0,357 | 0,41  | 1 |



|          |          |          |       |       |   |
|----------|----------|----------|-------|-------|---|
| Vrk1     | 0,017588 | -0,04163 | 0,19  | 0,241 | 1 |
| Nhlrc2   | 0,017598 | -0,05766 | 0,297 | 0,356 | 1 |
| Rps23    | 0,017636 | 0,058001 | 0,993 | 0,992 | 1 |
| Zfp74    | 0,017646 | -0,04159 | 0,236 | 0,289 | 1 |
| Gsn      | 0,017677 | -0,07584 | 0,952 | 0,961 | 1 |
| Trub2    | 0,017685 | -0,07662 | 0,293 | 0,343 | 1 |
| Sorbs3   | 0,017695 | 0,076493 | 0,524 | 0,483 | 1 |
| Pick1    | 0,017747 | -0,05611 | 0,398 | 0,465 | 1 |
| Clasp2   | 0,017804 | -0,05994 | 0,991 | 0,992 | 1 |
| Trpv2    | 0,017815 | 0,02521  | 0,05  | 0,026 | 1 |
| Rwdd3    | 0,017846 | -0,03006 | 0,044 | 0,072 | 1 |
| Hint3    | 0,017885 | -0,07168 | 0,557 | 0,589 | 1 |
| Nhlrc1   | 0,017913 | -0,03777 | 0,15  | 0,197 | 1 |
| Traf5    | 0,018002 | 0,016849 | 0,013 | 0,002 | 1 |
| Olfr920  | 0,018035 | 0,012988 | 0,013 | 0,002 | 1 |
| Far1     | 0,018089 | -0,05213 | 0,735 | 0,771 | 1 |
| H2-T24   | 0,018091 | -0,01859 | 0,004 | 0,015 | 1 |
| Zfp991   | 0,01813  | 0,017755 | 0,022 | 0,007 | 1 |
| Ccdc15   | 0,018146 | -0,04053 | 0,079 | 0,114 | 1 |
| Calb2    | 0,01816  | -0,01381 | 0,004 | 0,015 | 1 |
| Serp1    | 0,018162 | -0,06045 | 0,572 | 0,628 | 1 |
| Ptpre    | 0,01819  | -0,05485 | 0,339 | 0,398 | 1 |
| Josd2    | 0,018195 | -0,04505 | 0,996 | 0,995 | 1 |
| Btg1     | 0,018238 | 0,144462 | 0,404 | 0,353 | 1 |
| Flrt1    | 0,018294 | 0,05818  | 0,124 | 0,086 | 1 |
| Fbxo7    | 0,018308 | -0,05921 | 0,787 | 0,82  | 1 |
| Epn2     | 0,018327 | -0,04652 | 0,983 | 0,985 | 1 |
| Gm19325  | 0,018385 | -0,01123 | 0,004 | 0,015 | 1 |
| Gm43951  | 0,018385 | -0,01123 | 0,004 | 0,015 | 1 |
| Arfgap1  | 0,018443 | -0,03659 | 0,316 | 0,38  | 1 |
| Foxp1    | 0,018452 | -0,05228 | 0,638 | 0,694 | 1 |
| Cth      | 0,018454 | -0,00963 | 0,004 | 0,015 | 1 |
| Slc6a11  | 0,018454 | -0,00963 | 0,004 | 0,015 | 1 |
| Rtca     | 0,018462 | -0,03526 | 0,226 | 0,281 | 1 |
| Ppp2ca   | 0,018478 | 0,060294 | 0,995 | 0,992 | 1 |
| Gm39129  | 0,018513 | -0,01714 | 0,012 | 0,028 | 1 |
| Ckap2l   | 0,018542 | -0,01026 | 0,004 | 0,015 | 1 |
| Gm10371  | 0,018588 | -0,02713 | 0,03  | 0,054 | 1 |
| Cpped1   | 0,018609 | -0,05013 | 0,234 | 0,286 | 1 |
| Maf      | 0,01863  | -0,01115 | 0,004 | 0,015 | 1 |
| Fdft1    | 0,018636 | 0,126374 | 0,658 | 0,654 | 1 |
| Prr13    | 0,018678 | -0,05623 | 0,413 | 0,475 | 1 |
| Sec11c   | 0,018686 | 0,062592 | 0,999 | 1     | 1 |
| Aqr      | 0,018714 | -0,05539 | 0,346 | 0,403 | 1 |
| Ccdc3    | 0,018752 | -0,01993 | 0,012 | 0,028 | 1 |
| Prkag1   | 0,018795 | -0,05202 | 0,373 | 0,437 | 1 |
| Mrps27   | 0,018799 | -0,04106 | 0,082 | 0,117 | 1 |
| Itgb1bp1 | 0,01884  | -0,06275 | 0,371 | 0,421 | 1 |
| Zfp943   | 0,018847 | -0,05034 | 0,154 | 0,198 | 1 |
| Atp8a1   | 0,018851 | -0,06265 | 0,981 | 0,992 | 1 |
| Casp6    | 0,018891 | -0,02421 | 0,026 | 0,047 | 1 |
| Vopp1    | 0,018891 | -0,02421 | 0,026 | 0,047 | 1 |

|           |          |          |       |       |   |
|-----------|----------|----------|-------|-------|---|
| Zfp72     | 0,018928 | -0,04345 | 0,073 | 0,106 | 1 |
| Map4k3    | 0,018935 | -0,04243 | 0,185 | 0,236 | 1 |
| Wipi1     | 0,018967 | -0,05397 | 0,862 | 0,885 | 1 |
| Rps25     | 0,019003 | 0,049288 | 0,986 | 0,984 | 1 |
| Glt8d1    | 0,019021 | -0,03711 | 0,334 | 0,397 | 1 |
| Lrrc28    | 0,019053 | -0,05438 | 0,393 | 0,45  | 1 |
| Mrpl24    | 0,019078 | -0,0619  | 0,641 | 0,694 | 1 |
| Smtnl2    | 0,019114 | -0,04761 | 0,131 | 0,172 | 1 |
| Capn6     | 0,019126 | 0,027745 | 0,031 | 0,013 | 1 |
| Tbcd      | 0,019129 | -0,05463 | 0,357 | 0,416 | 1 |
| 4933434Ez | 0,019163 | 0,060995 | 0,732 | 0,688 | 1 |
| Cpsf7     | 0,019198 | -0,05996 | 0,428 | 0,493 | 1 |
| Sparcl1   | 0,019218 | -0,05051 | 0,09  | 0,127 | 1 |
| 2610001JC | 0,019278 | -0,07328 | 0,658 | 0,675 | 1 |
| Ythdf3    | 0,019314 | -0,04268 | 0,413 | 0,481 | 1 |
| Al429214  | 0,019321 | 0,014571 | 0,019 | 0,005 | 1 |
| Stat1     | 0,01934  | -0,3497  | 0,333 | 0,384 | 1 |
| Rpl32     | 0,019368 | 0,051113 | 0,987 | 0,993 | 1 |
| Pcyox1l   | 0,01939  | -0,05175 | 0,348 | 0,407 | 1 |
| Gm26603   | 0,019396 | 0,018113 | 0,016 | 0,003 | 1 |
| Pdlim5    | 0,019437 | -0,0618  | 0,305 | 0,361 | 1 |
| Phf14     | 0,019443 | -0,0512  | 0,57  | 0,633 | 1 |
| Sdhaf4    | 0,019469 | -0,05807 | 0,203 | 0,249 | 1 |
| Nipbl     | 0,019475 | -0,04525 | 0,776 | 0,839 | 1 |
| Ephx1     | 0,019479 | 0,053318 | 0,187 | 0,143 | 1 |
| Stard3    | 0,019487 | -0,06925 | 0,583 | 0,628 | 1 |
| Appl2     | 0,019493 | -0,05156 | 0,6   | 0,663 | 1 |
| Gm14091   | 0,019495 | 0,008793 | 0,009 | 0     | 1 |
| 2810032Gf | 0,019495 | 0,008793 | 0,009 | 0     | 1 |
| Al463170  | 0,019495 | 0,008793 | 0,009 | 0     | 1 |
| Hbb-bt    | 0,019495 | 1,048988 | 0,009 | 0     | 1 |
| Srgn      | 0,019495 | 0,010737 | 0,009 | 0     | 1 |
| Klf5      | 0,019495 | 0,010737 | 0,009 | 0     | 1 |
| Mb21d1    | 0,019495 | 0,010737 | 0,009 | 0     | 1 |
| St14      | 0,019495 | 0,011707 | 0,009 | 0     | 1 |
| Cish      | 0,019495 | 0,011707 | 0,009 | 0     | 1 |
| Timm17a   | 0,019523 | -0,06266 | 0,657 | 0,717 | 1 |
| 5930422O  | 0,019533 | -0,01602 | 0,005 | 0,016 | 1 |
| Prune2    | 0,019542 | 0,074577 | 0,281 | 0,229 | 1 |
| Scg3      | 0,019578 | -0,05711 | 0,165 | 0,208 | 1 |
| Rpusd2    | 0,019623 | -0,01301 | 0,011 | 0,026 | 1 |
| R3hdm1    | 0,019668 | -0,07353 | 0,803 | 0,847 | 1 |
| Herc6     | 0,019672 | -0,09609 | 0,11  | 0,148 | 1 |
| Gm42421   | 0,01974  | 0,012644 | 0,016 | 0,003 | 1 |
| Pias4     | 0,01976  | -0,04747 | 0,426 | 0,485 | 1 |
| Gm20387   | 0,01979  | -0,01123 | 0,005 | 0,016 | 1 |
| Mzt2      | 0,019811 | -0,04773 | 0,178 | 0,224 | 1 |
| Fgl2      | 0,019837 | 0,053027 | 0,05  | 0,026 | 1 |
| Gpr27     | 0,01984  | 0,020554 | 0,026 | 0,01  | 1 |
| Gnaz      | 0,019927 | -0,02281 | 0,048 | 0,076 | 1 |
| Paqr9     | 0,01999  | 0,020775 | 0,031 | 0,013 | 1 |
| Snapc3    | 0,019999 | -0,05121 | 0,272 | 0,327 | 1 |

|           |          |          |       |       |   |
|-----------|----------|----------|-------|-------|---|
| Gm14418   | 0,020087 | -0,02015 | 0,035 | 0,06  | 1 |
| Gys1      | 0,020105 | -0,01265 | 0,011 | 0,026 | 1 |
| Hnrnp1    | 0,020147 | 0,10611  | 0,84  | 0,807 | 1 |
| Cep57     | 0,020156 | -0,04394 | 0,174 | 0,221 | 1 |
| Dcun1d2   | 0,020169 | -0,04128 | 0,216 | 0,268 | 1 |
| Vat1      | 0,020289 | 0,051737 | 0,611 | 0,541 | 1 |
| AC154782. | 0,02029  | -0,01045 | 0,01  | 0,024 | 1 |
| Tmem185t  | 0,020344 | -0,02492 | 0,119 | 0,161 | 1 |
| Hus1      | 0,020382 | -0,05319 | 0,245 | 0,294 | 1 |
| Ckb       | 0,020396 | 0,076598 | 0,997 | 0,99  | 1 |
| Me2       | 0,020422 | -0,06439 | 0,348 | 0,402 | 1 |
| Lmo7      | 0,020425 | -0,03588 | 0,042 | 0,068 | 1 |
| Vsn11     | 0,020442 | -0,01945 | 0,019 | 0,037 | 1 |
| Prkar2a   | 0,020443 | -0,05421 | 0,184 | 0,231 | 1 |
| Sugp2     | 0,020461 | -0,04747 | 0,218 | 0,268 | 1 |
| Lancl2    | 0,020474 | -0,05174 | 0,211 | 0,26  | 1 |
| Gm4951    | 0,020589 | -0,0373  | 0,001 | 0,008 | 1 |
| Gm42372   | 0,020626 | -0,05828 | 0,253 | 0,304 | 1 |
| Klf15     | 0,020647 | -0,0399  | 0,237 | 0,291 | 1 |
| Zfp354c   | 0,020657 | -0,05225 | 0,144 | 0,187 | 1 |
| Tceal6    | 0,020674 | -0,00873 | 0,001 | 0,008 | 1 |
| Tbc1d22bc | 0,020674 | -0,00873 | 0,001 | 0,008 | 1 |
| Tpgs1     | 0,020694 | -0,05275 | 0,576 | 0,626 | 1 |
| Ncbp3     | 0,020699 | -0,05954 | 0,287 | 0,343 | 1 |
| Nat8l     | 0,020702 | -0,00712 | 0,001 | 0,008 | 1 |
| Aoc2      | 0,020702 | -0,00712 | 0,001 | 0,008 | 1 |
| Tmem179   | 0,020702 | -0,00712 | 0,001 | 0,008 | 1 |
| Rmi2      | 0,020702 | -0,00712 | 0,001 | 0,008 | 1 |
| Fam111a   | 0,020702 | -0,00712 | 0,001 | 0,008 | 1 |
| Ldlrad4   | 0,020722 | 0,080626 | 0,482 | 0,441 | 1 |
| Tspyl5    | 0,020756 | -0,03348 | 0,051 | 0,08  | 1 |
| Cnot10    | 0,020762 | -0,05288 | 0,379 | 0,433 | 1 |
| Inca1     | 0,020812 | -0,01274 | 0,009 | 0,023 | 1 |
| Gm44148   | 0,020816 | -0,00775 | 0,001 | 0,008 | 1 |
| Al463229  | 0,020816 | -0,00775 | 0,001 | 0,008 | 1 |
| Zfp810    | 0,020824 | -0,01873 | 0,019 | 0,037 | 1 |
| K230010J2 | 0,020844 | -0,00614 | 0,001 | 0,008 | 1 |
| Plppr5    | 0,020863 | -0,02298 | 0,029 | 0,052 | 1 |
| Abca7     | 0,020878 | -0,02635 | 0,135 | 0,18  | 1 |
| Tubb3     | 0,020889 | 0,044253 | 0,673 | 0,613 | 1 |
| A830010M  | 0,020909 | -0,04802 | 0,476 | 0,533 | 1 |
| Phkb      | 0,020989 | -0,04192 | 0,292 | 0,351 | 1 |
| Pyurf     | 0,02104  | -0,04536 | 0,234 | 0,285 | 1 |
| Alg2      | 0,021057 | -0,0639  | 0,313 | 0,364 | 1 |
| Pign      | 0,021059 | -0,056   | 0,231 | 0,28  | 1 |
| Phka1     | 0,021075 | -0,03581 | 0,116 | 0,156 | 1 |
| Asb3      | 0,021124 | -0,04361 | 0,191 | 0,241 | 1 |
| Akap11    | 0,021132 | 0,070333 | 0,801 | 0,772 | 1 |
| Iffo1     | 0,021151 | 0,077942 | 0,475 | 0,424 | 1 |
| Map7d2    | 0,021203 | -0,08899 | 0,316 | 0,361 | 1 |
| B230398E  | 0,021246 | -0,01212 | 0,007 | 0,02  | 1 |
| Rnf181    | 0,021249 | -0,05991 | 0,776 | 0,823 | 1 |

|           |          |          |       |       |   |
|-----------|----------|----------|-------|-------|---|
| Rpap3     | 0,02136  | -0,05717 | 0,216 | 0,263 | 1 |
| Rabep1    | 0,021438 | -0,054   | 0,472 | 0,53  | 1 |
| Ttc8      | 0,021465 | -0,04108 | 0,199 | 0,249 | 1 |
| Morf4l1   | 0,021486 | -0,0496  | 0,997 | 1     | 1 |
| Srp19     | 0,021525 | -0,04542 | 0,714 | 0,776 | 1 |
| Gm43598   | 0,021635 | -0,02051 | 0,029 | 0,052 | 1 |
| Ptpn14    | 0,021695 | 0,055789 | 0,042 | 0,021 | 1 |
| Tubb2b    | 0,021787 | -0,19386 | 0,146 | 0,185 | 1 |
| Zbtb42    | 0,021812 | 0,023774 | 0,024 | 0,008 | 1 |
| Slc43a2   | 0,021833 | -0,05776 | 0,633 | 0,678 | 1 |
| Slc39a7   | 0,0219   | 0,069679 | 0,651 | 0,605 | 1 |
| Cers4     | 0,021943 | 0,060386 | 0,273 | 0,223 | 1 |
| Rps12-ps3 | 0,021947 | 0,01901  | 0,024 | 0,008 | 1 |
| Csnk1g3   | 0,02195  | -0,04051 | 0,405 | 0,468 | 1 |
| Ash2l     | 0,021963 | -0,04396 | 0,392 | 0,455 | 1 |
| Rnf187    | 0,021966 | 0,0655   | 0,895 | 0,894 | 1 |
| Shank1    | 0,021971 | -0,02545 | 0,033 | 0,057 | 1 |
| Tiam1     | 0,022114 | -0,01427 | 0,061 | 0,093 | 1 |
| Rpp30     | 0,022177 | -0,05742 | 0,307 | 0,361 | 1 |
| Fgf7      | 0,022178 | 0,073626 | 0,121 | 0,086 | 1 |
| Mrps21    | 0,022187 | -0,05919 | 0,695 | 0,745 | 1 |
| Rps27rt   | 0,022224 | 0,047907 | 0,253 | 0,203 | 1 |
| Crebbp    | 0,02227  | -0,03888 | 0,614 | 0,683 | 1 |
| Sbno2     | 0,022286 | 0,246564 | 0,374 | 0,338 | 1 |
| Ctu1      | 0,022301 | -0,02268 | 0,05  | 0,078 | 1 |
| Pcdhgc5   | 0,022306 | -0,02039 | 0,038 | 0,063 | 1 |
| Gatad1    | 0,022306 | -0,04962 | 0,693 | 0,753 | 1 |
| Pmp22     | 0,022308 | 0,069534 | 0,973 | 0,964 | 1 |
| Rab26     | 0,022321 | 0,021504 | 0,028 | 0,011 | 1 |
| Socs1     | 0,022322 | 0,021795 | 0,024 | 0,008 | 1 |
| Sdc4      | 0,022405 | 0,066512 | 0,166 | 0,127 | 1 |
| Il1rapl1  | 0,022451 | -0,04508 | 0,153 | 0,197 | 1 |
| Rac1      | 0,022529 | -0,04238 | 0,993 | 0,997 | 1 |
| Ireb2     | 0,022554 | -0,0458  | 0,352 | 0,413 | 1 |
| Gm39459   | 0,022586 | 0,021795 | 0,028 | 0,011 | 1 |
| Arid1b    | 0,022671 | 0,087681 | 0,464 | 0,421 | 1 |
| Sel1l     | 0,022718 | -0,05247 | 0,787 | 0,826 | 1 |
| Ints6l    | 0,022862 | -0,05139 | 0,406 | 0,472 | 1 |
| Arf1      | 0,02296  | 0,050852 | 0,959 | 0,946 | 1 |
| Hs2st1    | 0,023013 | -0,0566  | 0,36  | 0,407 | 1 |
| Gipr      | 0,023061 | -0,04438 | 0,125 | 0,166 | 1 |
| Dctn5     | 0,023083 | -0,04297 | 0,383 | 0,447 | 1 |
| Mgme1     | 0,023169 | -0,05022 | 0,199 | 0,246 | 1 |
| Dgat2     | 0,023172 | 0,056888 | 0,274 | 0,223 | 1 |
| Fam32a    | 0,023381 | 0,058675 | 0,443 | 0,39  | 1 |
| Ptdss2    | 0,023404 | -0,06363 | 0,377 | 0,426 | 1 |
| Ticam1    | 0,023405 | 0,035613 | 0,059 | 0,034 | 1 |
| Sept8     | 0,023436 | -0,04114 | 0,991 | 0,997 | 1 |
| Miga2     | 0,023446 | -0,0341  | 0,136 | 0,179 | 1 |
| Ier5      | 0,023456 | 0,064197 | 0,09  | 0,06  | 1 |
| Synj1     | 0,023501 | -0,06006 | 0,455 | 0,514 | 1 |
| Atf7      | 0,023534 | -0,05533 | 0,542 | 0,597 | 1 |

|           |          |          |       |       |   |
|-----------|----------|----------|-------|-------|---|
| Numa1     | 0,023557 | -0,05016 | 0,564 | 0,623 | 1 |
| Ccnb1ip1  | 0,023687 | 0,015947 | 0,04  | 0,02  | 1 |
| Nfasc     | 0,02369  | -0,05492 | 0,987 | 0,985 | 1 |
| Hnrnpd    | 0,02374  | 0,076689 | 0,713 | 0,688 | 1 |
| Tnfrsf12a | 0,023836 | 0,106197 | 0,115 | 0,081 | 1 |
| Src       | 0,023855 | 0,0468   | 0,114 | 0,08  | 1 |
| Zbtb40    | 0,023903 | -0,03477 | 0,074 | 0,106 | 1 |
| Pex7      | 0,024038 | -0,04595 | 0,377 | 0,436 | 1 |
| Tmem168   | 0,024059 | -0,03262 | 0,313 | 0,377 | 1 |
| Lrrn1     | 0,024071 | -0,06273 | 0,919 | 0,932 | 1 |
| Tmem39b   | 0,024104 | -0,03066 | 0,091 | 0,127 | 1 |
| Heca      | 0,024151 | -0,03372 | 0,311 | 0,371 | 1 |
| Gopc      | 0,02416  | -0,04542 | 0,321 | 0,379 | 1 |
| Clp1      | 0,02417  | 0,045705 | 0,149 | 0,111 | 1 |
| Elmo1     | 0,024172 | -0,06575 | 0,875 | 0,917 | 1 |
| Hnrnpa3   | 0,024178 | 0,05937  | 0,972 | 0,971 | 1 |
| Atp13a2   | 0,024244 | -0,05833 | 0,223 | 0,27  | 1 |
| Tatdn1    | 0,02426  | -0,03433 | 0,206 | 0,257 | 1 |
| Fkrp      | 0,024291 | -0,04412 | 0,203 | 0,252 | 1 |
| Ino80c    | 0,024477 | -0,04561 | 0,227 | 0,278 | 1 |
| Trem2     | 0,024485 | 0,013916 | 0,021 | 0,007 | 1 |
| Dcbld2    | 0,024499 | 0,074357 | 0,276 | 0,231 | 1 |
| Mettl22   | 0,024535 | -0,03887 | 0,176 | 0,221 | 1 |
| Sh3kbp1   | 0,024539 | -0,06666 | 0,747 | 0,779 | 1 |
| Sema6a    | 0,024549 | -0,07346 | 0,556 | 0,607 | 1 |
| Ttc7b     | 0,024557 | -0,03705 | 0,182 | 0,229 | 1 |
| Tspyl4    | 0,024587 | -0,06458 | 0,714 | 0,751 | 1 |
| Tst       | 0,024597 | -0,04205 | 0,395 | 0,46  | 1 |
| Zgrf1     | 0,024675 | -0,02496 | 0,053 | 0,081 | 1 |
| Fam71a    | 0,02475  | 0,119472 | 0,046 | 0,024 | 1 |
| Blvrb     | 0,024784 | 0,046975 | 0,088 | 0,059 | 1 |
| 4632404H  | 0,024787 | -0,04049 | 0,083 | 0,117 | 1 |
| Nkiras1   | 0,024803 | -0,04293 | 0,485 | 0,55  | 1 |
| Akr7a5    | 0,02481  | 0,061146 | 0,479 | 0,424 | 1 |
| Rtn4      | 0,02482  | -0,04447 | 0,999 | 1     | 1 |
| Ercc6l2   | 0,024929 | -0,05889 | 0,414 | 0,46  | 1 |
| Sri       | 0,024982 | -0,04651 | 0,736 | 0,798 | 1 |
| Wbp2      | 0,024994 | -0,0546  | 0,974 | 0,99  | 1 |
| Wdr35     | 0,02506  | -0,04748 | 0,132 | 0,172 | 1 |
| 3110009E1 | 0,0252   | -0,03512 | 0,134 | 0,176 | 1 |
| Rbm4b     | 0,025211 | -0,03484 | 0,452 | 0,514 | 1 |
| Cyp2u1    | 0,025242 | -0,04127 | 0,235 | 0,283 | 1 |
| Sfi1      | 0,02525  | -0,07399 | 0,207 | 0,25  | 1 |
| Birc3     | 0,025253 | 0,012988 | 0,012 | 0,002 | 1 |
| Hist1h2ae | 0,025253 | 0,013955 | 0,012 | 0,002 | 1 |
| Tbxas1    | 0,025276 | 0,014921 | 0,012 | 0,002 | 1 |
| Zfp593    | 0,025303 | -0,03559 | 0,195 | 0,244 | 1 |
| D16Ert47  | 0,025323 | -0,0593  | 0,848 | 0,852 | 1 |
| Enpp6     | 0,025411 | 0,059993 | 0,851 | 0,782 | 1 |
| Ragef2    | 0,025461 | -0,05751 | 0,249 | 0,299 | 1 |
| Wwp1      | 0,02564  | -0,06354 | 0,589 | 0,626 | 1 |
| Gm35850   | 0,025665 | -0,0221  | 0,015 | 0,031 | 1 |

|           |          |          |       |       |   |
|-----------|----------|----------|-------|-------|---|
| 4833439L1 | 0,025676 | -0,05985 | 0,665 | 0,711 | 1 |
| Ankrd39   | 0,025709 | -0,03227 | 0,244 | 0,299 | 1 |
| Arfgap3   | 0,02571  | -0,03482 | 0,337 | 0,397 | 1 |
| Zfp786    | 0,025737 | -0,00487 | 0     | 0,005 | 1 |
| Gabra5    | 0,025737 | -0,00487 | 0     | 0,005 | 1 |
| Mgat4c    | 0,025737 | -0,00487 | 0     | 0,005 | 1 |
| Adcy1     | 0,025737 | -0,00487 | 0     | 0,005 | 1 |
| Kcnip1    | 0,025737 | -0,00487 | 0     | 0,005 | 1 |
| D430019H  | 0,025737 | -0,00487 | 0     | 0,005 | 1 |
| Tnfaip2   | 0,025737 | -0,00487 | 0     | 0,005 | 1 |
| Cd80      | 0,025737 | -0,00487 | 0     | 0,005 | 1 |
| Susd4     | 0,025738 | -0,00648 | 0     | 0,005 | 1 |
| Gfra4     | 0,025738 | -0,00648 | 0     | 0,005 | 1 |
| Gm16853   | 0,025738 | -0,00648 | 0     | 0,005 | 1 |
| Col11a1   | 0,025738 | -0,0081  | 0     | 0,005 | 1 |
| Oas1a     | 0,025738 | -0,0081  | 0     | 0,005 | 1 |
| Ccno      | 0,025738 | -0,0081  | 0     | 0,005 | 1 |
| Supt4a    | 0,025759 | -0,0363  | 0,749 | 0,818 | 1 |
| Pigf      | 0,025786 | -0,05206 | 0,194 | 0,239 | 1 |
| Gramd3    | 0,025893 | -0,04145 | 0,316 | 0,371 | 1 |
| Pxylp1    | 0,025995 | -0,04549 | 0,135 | 0,176 | 1 |
| Rb1       | 0,026071 | -0,0336  | 0,432 | 0,506 | 1 |
| Gstz1     | 0,026072 | -0,05239 | 0,332 | 0,385 | 1 |
| Ddx39b    | 0,026073 | 0,063765 | 0,918 | 0,898 | 1 |
| Sfpq      | 0,02608  | -0,04234 | 0,96  | 0,959 | 1 |
| Megf9     | 0,02608  | -0,07034 | 0,519 | 0,556 | 1 |
| Tmtc2     | 0,026109 | -0,04851 | 0,455 | 0,524 | 1 |
| Unc13a    | 0,026162 | -0,01957 | 0,015 | 0,031 | 1 |
| Ppp1r14a  | 0,026166 | -0,04745 | 0,99  | 0,998 | 1 |
| Abcb8     | 0,026197 | -0,04537 | 0,412 | 0,476 | 1 |
| Accs      | 0,026262 | -0,01933 | 0,031 | 0,054 | 1 |
| Fubp1     | 0,026265 | -0,04854 | 0,725 | 0,784 | 1 |
| Rasgef1b  | 0,026271 | -0,01738 | 0,089 | 0,125 | 1 |
| Eif4a1    | 0,026307 | 0,069606 | 0,988 | 0,997 | 1 |
| Serpib6a  | 0,026359 | 0,074774 | 0,818 | 0,795 | 1 |
| Zfp207    | 0,026365 | -0,05973 | 0,665 | 0,72  | 1 |
| Nfat5     | 0,026377 | -0,07998 | 0,664 | 0,709 | 1 |
| Abhd8     | 0,026383 | -0,018   | 0,015 | 0,031 | 1 |
| Spast     | 0,026388 | -0,04794 | 0,488 | 0,551 | 1 |
| Igsf3     | 0,026395 | 0,050781 | 0,152 | 0,114 | 1 |
| Irgm2     | 0,026432 | -0,08656 | 0,046 | 0,072 | 1 |
| Purb      | 0,026476 | 0,094879 | 0,902 | 0,894 | 1 |
| Tram1     | 0,026512 | -0,02662 | 0,395 | 0,465 | 1 |
| Cav2      | 0,026571 | -0,08568 | 0,205 | 0,249 | 1 |
| BC028528  | 0,026584 | 0,035629 | 0,127 | 0,091 | 1 |
| Zbtb16    | 0,026599 | -0,05195 | 0,19  | 0,237 | 1 |
| Ndufs6    | 0,026613 | -0,05703 | 0,89  | 0,912 | 1 |
| Dpysl5    | 0,026619 | -0,08822 | 0,187 | 0,228 | 1 |
| Mcam      | 0,026621 | 0,071032 | 0,666 | 0,608 | 1 |
| H2-T23    | 0,02671  | -0,52087 | 0,048 | 0,073 | 1 |
| Gm2115    | 0,026898 | -0,03855 | 0,076 | 0,107 | 1 |
| Med13l    | 0,026906 | -0,0518  | 0,425 | 0,481 | 1 |

|          |          |          |       |       |   |
|----------|----------|----------|-------|-------|---|
| Pasma6   | 0,026922 | -0,04414 | 0,773 | 0,813 | 1 |
| Itih5    | 0,026982 | 0,06506  | 0,171 | 0,132 | 1 |
| Zfp523   | 0,027008 | -0,04201 | 0,227 | 0,276 | 1 |
| Irf1     | 0,027078 | 0,130805 | 0,131 | 0,094 | 1 |
| Aldh5a1  | 0,027181 | -0,03669 | 0,194 | 0,242 | 1 |
| Tmem42   | 0,027186 | 0,047816 | 0,206 | 0,163 | 1 |
| Ndr3     | 0,027261 | -0,07765 | 0,561 | 0,576 | 1 |
| Znfx1    | 0,027281 | -0,04251 | 0,4   | 0,47  | 1 |
| Tasp1    | 0,027311 | -0,01968 | 0,052 | 0,08  | 1 |
| Unc13d   | 0,027358 | 0,024919 | 0,032 | 0,015 | 1 |
| Tac2     | 0,02736  | -0,02005 | 0,021 | 0,039 | 1 |
| Ubr4     | 0,027366 | -0,05033 | 0,424 | 0,481 | 1 |
| Gm17354  | 0,02742  | -0,03531 | 0,085 | 0,119 | 1 |
| Npc2     | 0,027438 | 0,063598 | 0,988 | 0,989 | 1 |
| Gin1     | 0,027475 | -0,03527 | 0,165 | 0,208 | 1 |
| Ccdc171  | 0,027498 | 0,026509 | 0,05  | 0,028 | 1 |
| Zfp182   | 0,027529 | -0,04614 | 0,27  | 0,322 | 1 |
| Ivd      | 0,027549 | -0,04302 | 0,357 | 0,416 | 1 |
| Ccny     | 0,027588 | -0,033   | 0,302 | 0,359 | 1 |
| Adi1     | 0,027634 | -0,05683 | 0,791 | 0,839 | 1 |
| Fbxo48   | 0,027693 | 0,00782  | 0,008 | 0     | 1 |
| Rgs9     | 0,027693 | 0,009766 | 0,008 | 0     | 1 |
| Slc9a3   | 0,027693 | 0,009766 | 0,008 | 0     | 1 |
| Mgp      | 0,027693 | 0,008793 | 0,008 | 0     | 1 |
| Ppm1n    | 0,027694 | 0,026152 | 0,008 | 0     | 1 |
| Diexf    | 0,027806 | 0,047244 | 0,151 | 0,114 | 1 |
| Ncoa4    | 0,02789  | -0,05249 | 0,619 | 0,663 | 1 |
| Chm      | 0,027893 | -0,0528  | 0,404 | 0,46  | 1 |
| Sf3b5    | 0,027955 | -0,05821 | 0,639 | 0,688 | 1 |
| Cpeb3    | 0,027963 | -0,05333 | 0,373 | 0,433 | 1 |
| Slc25a35 | 0,027986 | -0,02665 | 0,062 | 0,091 | 1 |
| Syf2     | 0,028025 | -0,04839 | 0,918 | 0,912 | 1 |
| Ndst4    | 0,028082 | -0,01739 | 0,014 | 0,029 | 1 |
| Pgm2l1   | 0,028096 | 0,041911 | 0,075 | 0,047 | 1 |
| Cenpc1   | 0,028102 | -0,04878 | 0,298 | 0,351 | 1 |
| Zer1     | 0,028121 | -0,06323 | 0,591 | 0,616 | 1 |
| Psmb5    | 0,028132 | -0,05258 | 0,823 | 0,849 | 1 |
| Smyd2    | 0,02815  | -0,05993 | 0,219 | 0,262 | 1 |
| Fam210b  | 0,028184 | -0,04753 | 0,138 | 0,177 | 1 |
| Syt11    | 0,028184 | -0,0448  | 0,999 | 1     | 1 |
| Klhdc4   | 0,028252 | -0,03719 | 0,185 | 0,233 | 1 |
| Snx19    | 0,028258 | -0,03954 | 0,252 | 0,304 | 1 |
| Dhrs7    | 0,028294 | 0,052684 | 0,535 | 0,485 | 1 |
| Zfp317   | 0,02831  | -0,03697 | 0,218 | 0,267 | 1 |
| Dtd1     | 0,02832  | -0,07121 | 0,474 | 0,519 | 1 |
| Brcc3    | 0,028364 | -0,04062 | 0,35  | 0,405 | 1 |
| Gm10031  | 0,028427 | -0,03881 | 0,11  | 0,146 | 1 |
| Trim12a  | 0,028462 | -0,02214 | 0,002 | 0,01  | 1 |
| Triobp   | 0,028481 | -0,05297 | 0,203 | 0,247 | 1 |
| Ndc1     | 0,028487 | -0,05964 | 0,202 | 0,246 | 1 |
| Ammecr1  | 0,028497 | -0,02265 | 0,083 | 0,117 | 1 |
| Pcdhga9  | 0,028512 | -0,02329 | 0,043 | 0,068 | 1 |

|           |          |          |       |       |   |
|-----------|----------|----------|-------|-------|---|
| Slc45a4   | 0,028653 | -0,0288  | 0,05  | 0,076 | 1 |
| Zfyve26   | 0,028683 | -0,04443 | 0,354 | 0,411 | 1 |
| Ube2j1    | 0,028715 | -0,04155 | 0,26  | 0,314 | 1 |
| Ggnbp1    | 0,028726 | -0,03548 | 0,108 | 0,145 | 1 |
| Hsp90b1   | 0,028745 | -0,05799 | 0,992 | 0,997 | 1 |
| Copg2     | 0,028758 | -0,05915 | 0,398 | 0,454 | 1 |
| Lins1     | 0,028758 | -0,02953 | 0,079 | 0,112 | 1 |
| Cope      | 0,028831 | -0,05015 | 0,792 | 0,831 | 1 |
| Lgi2      | 0,028853 | -0,00775 | 0,002 | 0,01  | 1 |
| 2810425M  | 0,028853 | -0,00775 | 0,002 | 0,01  | 1 |
| Cck       | 0,028853 | -0,00775 | 0,002 | 0,01  | 1 |
| Gm15491   | 0,028853 | -0,00775 | 0,002 | 0,01  | 1 |
| Tfrc      | 0,028853 | -0,06608 | 0,384 | 0,437 | 1 |
| Ifit2     | 0,028925 | -0,08334 | 0,208 | 0,254 | 1 |
| Rpl36a    | 0,028933 | 0,05094  | 0,954 | 0,92  | 1 |
| Gm47547   | 0,028967 | -0,01449 | 0,014 | 0,029 | 1 |
| Srrd      | 0,028972 | -0,04802 | 0,175 | 0,216 | 1 |
| Dysf      | 0,028984 | -0,00838 | 0,002 | 0,01  | 1 |
| Spata9    | 0,028984 | -0,00838 | 0,002 | 0,01  | 1 |
| Ttc26     | 0,029031 | 0,01901  | 0,023 | 0,008 | 1 |
| Cdkl1     | 0,02905  | -0,00579 | 0,002 | 0,01  | 1 |
| Id3       | 0,029052 | -0,03297 | 0,054 | 0,081 | 1 |
| Abhd17c   | 0,029076 | -0,03638 | 0,197 | 0,246 | 1 |
| Wdr78     | 0,029119 | 0,01901  | 0,023 | 0,008 | 1 |
| Ccdc58    | 0,029186 | -0,03968 | 0,177 | 0,221 | 1 |
| Dock4     | 0,029311 | -0,04303 | 0,403 | 0,459 | 1 |
| Sorcs1    | 0,029335 | -0,04281 | 0,291 | 0,345 | 1 |
| Foxo1     | 0,029401 | -0,06391 | 0,362 | 0,408 | 1 |
| Lrrc47    | 0,029459 | -0,04124 | 0,285 | 0,34  | 1 |
| Wnk3      | 0,029511 | -0,03568 | 0,068 | 0,098 | 1 |
| Gm37885   | 0,029518 | 0,018947 | 0,027 | 0,011 | 1 |
| Cdc14b    | 0,029522 | -0,03354 | 0,091 | 0,125 | 1 |
| Chl1      | 0,029524 | -0,02953 | 0,013 | 0,028 | 1 |
| Cstf2t    | 0,029548 | -0,05199 | 0,324 | 0,377 | 1 |
| Rmdn1     | 0,029632 | 0,06938  | 0,29  | 0,249 | 1 |
| Tom1      | 0,02964  | -0,04397 | 0,4   | 0,46  | 1 |
| Csf1      | 0,029678 | 0,089799 | 0,822 | 0,792 | 1 |
| Mxra7     | 0,029799 | 0,047385 | 0,114 | 0,081 | 1 |
| Apopt1    | 0,029869 | -0,04716 | 0,492 | 0,551 | 1 |
| 2700016F2 | 0,029914 | -0,05297 | 0,126 | 0,163 | 1 |
| Gm1673    | 0,029955 | -0,01757 | 0,035 | 0,059 | 1 |
| Dis3      | 0,029987 | -0,03182 | 0,15  | 0,193 | 1 |
| Tsc1      | 0,030042 | -0,07904 | 0,565 | 0,61  | 1 |
| Cad       | 0,030056 | -0,02753 | 0,079 | 0,111 | 1 |
| Asap3     | 0,030059 | 0,020484 | 0,034 | 0,016 | 1 |
| Fam13b    | 0,030114 | -0,04542 | 0,26  | 0,311 | 1 |
| Fyco1     | 0,030141 | -0,0623  | 0,336 | 0,379 | 1 |
| Bet1      | 0,030452 | -0,05171 | 0,684 | 0,75  | 1 |
| Tnni1     | 0,030488 | -0,04657 | 0,658 | 0,72  | 1 |
| Agl       | 0,030505 | -0,04458 | 0,196 | 0,244 | 1 |
| Gm26853   | 0,030527 | -0,0383  | 0,248 | 0,299 | 1 |
| Epc2      | 0,030564 | -0,03392 | 0,348 | 0,411 | 1 |



|            |          |          |       |       |   |
|------------|----------|----------|-------|-------|---|
| Med12l     | 0,030565 | -0,01681 | 0,02  | 0,037 | 1 |
| Ppp1r9a    | 0,030599 | -0,05675 | 0,473 | 0,527 | 1 |
| Fosl2      | 0,03068  | 0,053225 | 0,127 | 0,093 | 1 |
| Tbc1d14    | 0,030686 | -0,04655 | 0,685 | 0,728 | 1 |
| Ubr5       | 0,03071  | 0,058407 | 0,58  | 0,514 | 1 |
| Zfp966     | 0,030898 | -0,01957 | 0,025 | 0,044 | 1 |
| Aldh4a1    | 0,030947 | -0,03074 | 0,139 | 0,18  | 1 |
| Banp       | 0,031045 | -0,03889 | 0,238 | 0,288 | 1 |
| H1f0       | 0,031054 | 0,089233 | 0,605 | 0,551 | 1 |
| Dnajc12    | 0,031072 | -0,02885 | 0,108 | 0,145 | 1 |
| Ube2f      | 0,031097 | -0,05108 | 0,275 | 0,324 | 1 |
| Cmtm5      | 0,031103 | 0,050818 | 0,999 | 1     | 1 |
| Efna1      | 0,031202 | 0,089752 | 0,344 | 0,307 | 1 |
| Fut11      | 0,03122  | -0,04522 | 0,162 | 0,203 | 1 |
| Phf21a     | 0,031237 | -0,03723 | 0,392 | 0,45  | 1 |
| Atp8a2     | 0,031262 | -0,01714 | 0,012 | 0,026 | 1 |
| Hdhd2      | 0,031279 | -0,04569 | 0,626 | 0,675 | 1 |
| Map4k2     | 0,031499 | -0,05254 | 0,247 | 0,296 | 1 |
| Eif3h      | 0,031522 | -0,03663 | 0,803 | 0,836 | 1 |
| Gm34552    | 0,03174  | -0,018   | 0,012 | 0,026 | 1 |
| Atg4a      | 0,031753 | -0,03444 | 0,131 | 0,169 | 1 |
| Cenpx      | 0,031759 | -0,05264 | 0,448 | 0,502 | 1 |
| Arl8a      | 0,031883 | 0,042284 | 0,976 | 0,974 | 1 |
| Abraxas1   | 0,031902 | -0,0184  | 0,042 | 0,067 | 1 |
| H2-T22     | 0,03191  | -0,09414 | 0,091 | 0,122 | 1 |
| Prrc2c     | 0,031969 | -0,03922 | 0,959 | 0,95  | 1 |
| Mrps35     | 0,031979 | -0,03857 | 0,216 | 0,263 | 1 |
| Mpv17l2    | 0,032003 | -0,04614 | 0,352 | 0,405 | 1 |
| Gpr45      | 0,032025 | -0,01301 | 0,012 | 0,026 | 1 |
| Ing4       | 0,032042 | -0,04871 | 0,561 | 0,608 | 1 |
| Gm45871    | 0,032045 | -0,03368 | 0,074 | 0,104 | 1 |
| Mthfd2     | 0,032056 | -0,04162 | 0,357 | 0,41  | 1 |
| Ankrd26    | 0,032087 | -0,04389 | 0,325 | 0,38  | 1 |
| Gm29417    | 0,032185 | 0,022296 | 0,036 | 0,018 | 1 |
| Gss        | 0,03224  | -0,08935 | 0,451 | 0,489 | 1 |
| Ppp1r10    | 0,032271 | 0,16211  | 0,523 | 0,494 | 1 |
| Sqstm1     | 0,032293 | 0,056231 | 0,946 | 0,932 | 1 |
| Map3k5     | 0,032369 | -0,02262 | 0,096 | 0,132 | 1 |
| Bdkrb2     | 0,03241  | -0,04325 | 0,109 | 0,145 | 1 |
| Gt(ROSA)26 | 0,032552 | -0,01465 | 0,019 | 0,036 | 1 |
| Prkcz      | 0,032563 | -0,03462 | 0,888 | 0,919 | 1 |
| Hnrnpc     | 0,032571 | -0,04882 | 0,946 | 0,967 | 1 |
| Pfn2       | 0,032618 | -0,04805 | 0,751 | 0,805 | 1 |
| Zc4h2      | 0,032622 | -0,04715 | 0,191 | 0,234 | 1 |
| Pcdhgb6    | 0,032631 | -0,02289 | 0,028 | 0,049 | 1 |
| Alg8       | 0,032663 | 0,029879 | 0,068 | 0,042 | 1 |
| Abhd18     | 0,032722 | -0,0383  | 0,233 | 0,283 | 1 |
| Txndc17    | 0,032819 | -0,05391 | 0,701 | 0,763 | 1 |
| Slc25a51   | 0,032843 | -0,05969 | 0,629 | 0,672 | 1 |
| B230219D   | 0,032866 | -0,0504  | 0,846 | 0,878 | 1 |
| 2010107E   | 0,032914 | -0,05771 | 0,838 | 0,865 | 1 |
| Zfp157     | 0,032943 | -0,03725 | 0,275 | 0,33  | 1 |

|           |          |          |       |       |   |
|-----------|----------|----------|-------|-------|---|
| Ccni      | 0,032947 | -0,04517 | 0,679 | 0,712 | 1 |
| Gm45768   | 0,032989 | 0,082559 | 0,52  | 0,473 | 1 |
| Tmcc3     | 0,032996 | 0,073923 | 0,994 | 0,997 | 1 |
| Gm16638   | 0,033006 | -0,0346  | 0,097 | 0,132 | 1 |
| Rcn2      | 0,033056 | 0,074473 | 0,411 | 0,369 | 1 |
| Smc1a     | 0,033113 | -0,03294 | 0,739 | 0,779 | 1 |
| Selenok   | 0,033125 | 0,053897 | 1     | 1     | 1 |
| Hhat      | 0,033155 | 0,01134  | 0,02  | 0,007 | 1 |
| Gtf2h4    | 0,033191 | -0,03634 | 0,118 | 0,154 | 1 |
| Cfdp1     | 0,033228 | -0,05023 | 0,769 | 0,792 | 1 |
| Phgdh     | 0,033342 | -0,04702 | 0,984 | 0,993 | 1 |
| Ankrd54   | 0,033364 | -0,03872 | 0,207 | 0,252 | 1 |
| Sapcd1    | 0,033396 | 0,021212 | 0,025 | 0,01  | 1 |
| Lsm14b    | 0,033436 | -0,04582 | 0,341 | 0,392 | 1 |
| C920021L1 | 0,03346  | -0,02352 | 0,045 | 0,07  | 1 |
| Smim27    | 0,033481 | -0,04686 | 0,322 | 0,377 | 1 |
| Azin1     | 0,033497 | 0,102895 | 0,42  | 0,377 | 1 |
| AU040320  | 0,033527 | -0,04537 | 0,314 | 0,367 | 1 |
| Fbl       | 0,033554 | 0,105188 | 0,637 | 0,598 | 1 |
| Rbm28     | 0,033565 | -0,06156 | 0,539 | 0,59  | 1 |
| Dscam     | 0,03357  | 0,014791 | 0,029 | 0,013 | 1 |
| Smad9     | 0,033624 | 0,017398 | 0,025 | 0,01  | 1 |
| Camk2n1   | 0,033628 | -0,07101 | 0,501 | 0,54  | 1 |
| AC162302. | 0,033689 | -0,03103 | 0,048 | 0,073 | 1 |
| Zfp395    | 0,033717 | 0,059295 | 0,243 | 0,2   | 1 |
| Hr        | 0,033854 | 0,052426 | 0,25  | 0,207 | 1 |
| Sox2      | 0,033879 | -0,00829 | 0,752 | 0,784 | 1 |
| Hmbox1    | 0,033886 | -0,03243 | 0,42  | 0,486 | 1 |
| Lcn2      | 0,034091 | -0,00998 | 0,003 | 0,011 | 1 |
| Gm14862   | 0,034091 | -0,00998 | 0,003 | 0,011 | 1 |
| Kcnj16    | 0,034091 | -0,00998 | 0,003 | 0,011 | 1 |
| Tmem47    | 0,034105 | -0,02567 | 0,032 | 0,054 | 1 |
| Grm4      | 0,034153 | -0,01424 | 0,011 | 0,024 | 1 |
| Psip1     | 0,034157 | -0,04295 | 0,925 | 0,945 | 1 |
| Rbms3     | 0,034192 | -0,00838 | 0,003 | 0,011 | 1 |
| Acss1     | 0,034217 | -0,01764 | 0,018 | 0,034 | 1 |
| Cct2      | 0,034255 | -0,04542 | 0,826 | 0,857 | 1 |
| Polr2a    | 0,03429  | 0,08263  | 0,53  | 0,502 | 1 |
| Tgfb2     | 0,03432  | -0,05924 | 0,043 | 0,067 | 1 |
| Gm12689   | 0,034389 | -0,03946 | 0,081 | 0,112 | 1 |
| Klhl13    | 0,034427 | -0,02885 | 0,052 | 0,078 | 1 |
| Col22a1   | 0,034431 | -0,0074  | 0,003 | 0,011 | 1 |
| Spats2    | 0,034431 | -0,0074  | 0,003 | 0,011 | 1 |
| Atl2      | 0,034446 | 0,040459 | 0,154 | 0,117 | 1 |
| Plod1     | 0,034451 | 0,071263 | 0,718 | 0,694 | 1 |
| Timm50    | 0,034508 | -0,04847 | 0,376 | 0,428 | 1 |
| Nradd     | 0,034605 | 0,026752 | 0,078 | 0,05  | 1 |
| 9530077C  | 0,034623 | -0,03157 | 0,092 | 0,125 | 1 |
| Nck1      | 0,03463  | -0,03948 | 0,208 | 0,254 | 1 |
| Fsd1      | 0,034634 | 0,065898 | 0,359 | 0,319 | 1 |
| Taf5l     | 0,034722 | -0,01978 | 0,097 | 0,132 | 1 |
| Ppp2r5c   | 0,034761 | -0,05701 | 0,804 | 0,836 | 1 |

|           |          |          |       |       |   |
|-----------|----------|----------|-------|-------|---|
| Dapk2     | 0,034795 | -0,04308 | 0,133 | 0,171 | 1 |
| Gpcpd1    | 0,034816 | -0,0343  | 0,156 | 0,197 | 1 |
| Rps26     | 0,034824 | 0,056792 | 0,988 | 0,989 | 1 |
| Mical12   | 0,034834 | 0,022142 | 0,049 | 0,028 | 1 |
| Rps16     | 0,034886 | 0,056908 | 0,992 | 0,99  | 1 |
| Ubac1     | 0,034983 | -0,03397 | 0,422 | 0,483 | 1 |
| 4931440F1 | 0,035    | -0,01714 | 0,01  | 0,023 | 1 |
| Bag3      | 0,035086 | -0,0355  | 0,287 | 0,34  | 1 |
| Dse       | 0,035169 | -0,02037 | 0,049 | 0,075 | 1 |
| Gpat4     | 0,035171 | 0,071947 | 0,472 | 0,441 | 1 |
| Notch2    | 0,035222 | 0,040124 | 0,132 | 0,098 | 1 |
| Cdh1      | 0,035263 | 0,028344 | 0,011 | 0,002 | 1 |
| Flii      | 0,035291 | 0,059575 | 0,5   | 0,455 | 1 |
| Cep290    | 0,035309 | -0,04167 | 0,282 | 0,337 | 1 |
| C2cd4c    | 0,035363 | 0,014571 | 0,017 | 0,005 | 1 |
| Iars2     | 0,035381 | -0,04166 | 0,274 | 0,324 | 1 |
| Ccl4      | 0,035422 | 0,012988 | 0,011 | 0,002 | 1 |
| Gramd1a   | 0,035433 | -0,04374 | 0,241 | 0,288 | 1 |
| Glyctk    | 0,035437 | 0,013608 | 0,017 | 0,005 | 1 |
| Ephb6     | 0,035454 | 0,012021 | 0,011 | 0,002 | 1 |
| Nmnat2    | 0,035486 | 0,011052 | 0,011 | 0,002 | 1 |
| Paqr4     | 0,035528 | -0,05741 | 0,596 | 0,633 | 1 |
| Cyp46a1   | 0,035537 | -0,0315  | 0,073 | 0,102 | 1 |
| Hspd1     | 0,035537 | -0,03495 | 0,868 | 0,885 | 1 |
| Mthfs     | 0,035557 | -0,04217 | 0,326 | 0,379 | 1 |
| Cyb561d1  | 0,035621 | -0,02642 | 0,077 | 0,107 | 1 |
| Tfg       | 0,035626 | -0,0539  | 0,595 | 0,631 | 1 |
| Psen2     | 0,035779 | -0,03671 | 0,415 | 0,476 | 1 |
| Armc1     | 0,035786 | -0,06043 | 0,67  | 0,694 | 1 |
| Eno2      | 0,035789 | 0,065709 | 0,184 | 0,146 | 1 |
| Kcna6     | 0,035804 | -0,05394 | 0,792 | 0,813 | 1 |
| Tub       | 0,035922 | -0,0239  | 0,017 | 0,033 | 1 |
| Ifih1     | 0,035922 | -0,03012 | 0,017 | 0,033 | 1 |
| C77080    | 0,036013 | 0,020123 | 0,031 | 0,015 | 1 |
| Nat8f1    | 0,036023 | -0,05876 | 0,271 | 0,317 | 1 |
| Sv2c      | 0,03604  | 0,034175 | 0,017 | 0,005 | 1 |
| Vps13a    | 0,036064 | -0,04288 | 0,321 | 0,374 | 1 |
| Ryk       | 0,036082 | -0,06815 | 0,518 | 0,564 | 1 |
| Dtwd2     | 0,036097 | -0,02671 | 0,07  | 0,099 | 1 |
| Tmem131l  | 0,03614  | 0,014529 | 0,017 | 0,005 | 1 |
| Snrnp70   | 0,036142 | 0,075225 | 0,976 | 0,979 | 1 |
| Mrps12    | 0,03619  | -0,06255 | 0,489 | 0,528 | 1 |
| Arcn1     | 0,036228 | -0,0564  | 0,612 | 0,66  | 1 |
| Surf4     | 0,036273 | -0,04929 | 0,42  | 0,478 | 1 |
| Uba2      | 0,036276 | -0,05255 | 0,632 | 0,673 | 1 |
| Lpcat2    | 0,036324 | -0,08693 | 0,342 | 0,385 | 1 |
| Hsp90aa1  | 0,036332 | -0,03403 | 0,999 | 1     | 1 |
| Rpl37     | 0,036359 | 0,044488 | 0,997 | 0,998 | 1 |
| Samm50    | 0,036387 | -0,04817 | 0,512 | 0,559 | 1 |
| Cyth2     | 0,036435 | 0,058515 | 0,598 | 0,543 | 1 |
| Ppp2r3c   | 0,036498 | -0,03309 | 0,374 | 0,434 | 1 |
| Triap1    | 0,036499 | -0,03325 | 0,226 | 0,275 | 1 |

|          |          |          |       |       |   |
|----------|----------|----------|-------|-------|---|
| Gm6598   | 0,036575 | -0,01921 | 0,017 | 0,033 | 1 |
| Yipf3    | 0,036649 | -0,0434  | 0,58  | 0,626 | 1 |
| Sh3d19   | 0,03667  | 0,093666 | 0,468 | 0,434 | 1 |
| Pkm      | 0,036723 | 0,065735 | 0,887 | 0,893 | 1 |
| Nkx2-2   | 0,036754 | -0,06495 | 0,518 | 0,571 | 1 |
| Laptm4b  | 0,036829 | -0,04582 | 0,786 | 0,805 | 1 |
| Scoc     | 0,036863 | -0,04468 | 0,813 | 0,85  | 1 |
| Chmp2b   | 0,036955 | -0,05668 | 0,589 | 0,626 | 1 |
| Pitpm1   | 0,036979 | 0,012333 | 0,014 | 0,003 | 1 |
| Gm45518  | 0,036981 | 0,026054 | 0,014 | 0,003 | 1 |
| Cpsf6    | 0,036996 | -0,04763 | 0,615 | 0,662 | 1 |
| Fam221b  | 0,037036 | 0,011366 | 0,014 | 0,003 | 1 |
| Xntrpc   | 0,037036 | 0,011366 | 0,014 | 0,003 | 1 |
| Mitf     | 0,037039 | -0,04058 | 0,273 | 0,324 | 1 |
| Zfp277   | 0,03708  | -0,08781 | 0,271 | 0,32  | 1 |
| Slc5a11  | 0,037092 | -0,04473 | 0,05  | 0,075 | 1 |
| Trps1    | 0,037138 | -0,05266 | 0,477 | 0,522 | 1 |
| Cpxm2    | 0,037183 | -0,01061 | 0,004 | 0,013 | 1 |
| Dab2     | 0,037183 | -0,017   | 0,004 | 0,013 | 1 |
| Otud7b   | 0,037288 | -0,04502 | 0,977 | 0,984 | 1 |
| Ntng2    | 0,037316 | -0,00901 | 0,004 | 0,013 | 1 |
| Hes3     | 0,037316 | -0,00901 | 0,004 | 0,013 | 1 |
| Spryd7   | 0,037321 | -0,05192 | 0,406 | 0,455 | 1 |
| Nlgn3    | 0,037322 | -0,01779 | 0,027 | 0,047 | 1 |
| Nudt8.1  | 0,037335 | -0,02312 | 0,031 | 0,052 | 1 |
| Nlgn1    | 0,037391 | -0,03037 | 0,055 | 0,081 | 1 |
| Rab3ip   | 0,037422 | -0,02758 | 0,172 | 0,216 | 1 |
| Adnp     | 0,03746  | -0,03128 | 0,11  | 0,145 | 1 |
| Mapk3    | 0,037471 | 0,056669 | 0,979 | 0,977 | 1 |
| Psmg3    | 0,037515 | -0,05175 | 0,319 | 0,366 | 1 |
| Cyp51    | 0,037549 | 0,1358   | 0,705 | 0,688 | 1 |
| Mroh3    | 0,037576 | -0,0153  | 0,008 | 0,02  | 1 |
| Kcnc3    | 0,037585 | -0,00705 | 0,004 | 0,013 | 1 |
| Zfp994   | 0,037589 | -0,03639 | 0,08  | 0,111 | 1 |
| Iglon5   | 0,037591 | 0,028794 | 0,022 | 0,008 | 1 |
| Anp32b   | 0,0376   | 0,056007 | 0,914 | 0,873 | 1 |
| Faim2    | 0,037606 | -0,04652 | 0,913 | 0,932 | 1 |
| Srsf6    | 0,037612 | -0,05183 | 0,701 | 0,738 | 1 |
| Dck      | 0,03763  | 0,021138 | 0,026 | 0,011 | 1 |
| Ubac2    | 0,037646 | -0,04489 | 0,315 | 0,367 | 1 |
| Cpt1a    | 0,037663 | -0,02668 | 0,043 | 0,067 | 1 |
| Perp     | 0,037679 | -0,0131  | 0,008 | 0,02  | 1 |
| Mib1     | 0,037688 | -0,04096 | 0,374 | 0,428 | 1 |
| Kdm3b    | 0,037778 | -0,04468 | 0,286 | 0,337 | 1 |
| Zic3     | 0,037855 | -0,00413 | 0,004 | 0,013 | 1 |
| 1700047M | 0,03786  | 0,061938 | 0,933 | 0,925 | 1 |
| Stau1    | 0,037866 | -0,04059 | 0,395 | 0,447 | 1 |
| Akap1    | 0,037888 | -0,03274 | 0,193 | 0,239 | 1 |
| Cnih2    | 0,037888 | -0,0115  | 0,008 | 0,02  | 1 |
| Otud1    | 0,037911 | -0,04528 | 0,105 | 0,138 | 1 |
| Atp6v1g1 | 0,037917 | -0,0484  | 0,968 | 0,977 | 1 |
| Rtl5     | 0,037932 | -0,01353 | 0,017 | 0,033 | 1 |

|           |          |          |       |       |   |
|-----------|----------|----------|-------|-------|---|
| Pigz      | 0,037948 | -0,12668 | 0,775 | 0,772 | 1 |
| Sf3b4     | 0,037967 | -0,04488 | 0,454 | 0,512 | 1 |
| Gjb2      | 0,037995 | -0,01212 | 0,008 | 0,02  | 1 |
| Slamf1    | 0,038079 | 0,032043 | 0,033 | 0,016 | 1 |
| Slc50a1   | 0,038079 | -0,04836 | 0,742 | 0,779 | 1 |
| Prkrip1   | 0,038148 | -0,04318 | 0,281 | 0,33  | 1 |
| Tmem234   | 0,038247 | -0,04467 | 0,931 | 0,953 | 1 |
| Auh       | 0,038262 | -0,04859 | 0,695 | 0,748 | 1 |
| Ndst1     | 0,038289 | 0,058893 | 0,627 | 0,584 | 1 |
| Mtmr11    | 0,038291 | 0,017098 | 0,022 | 0,008 | 1 |
| Apeh      | 0,038312 | -0,03441 | 0,084 | 0,115 | 1 |
| Dyrk1b    | 0,038336 | -0,0382  | 0,131 | 0,167 | 1 |
| Tmem74    | 0,038348 | 0,028053 | 0,067 | 0,042 | 1 |
| Slc25a1   | 0,038357 | -0,06031 | 0,501 | 0,538 | 1 |
| Sat1      | 0,038404 | -0,06488 | 0,644 | 0,694 | 1 |
| Gm10471   | 0,038404 | 0,017098 | 0,022 | 0,008 | 1 |
| Gm38394   | 0,038563 | -0,01945 | 0,048 | 0,073 | 1 |
| Derl1     | 0,038565 | -0,04889 | 0,756 | 0,805 | 1 |
| Tyropb    | 0,038574 | 0,016692 | 0,033 | 0,016 | 1 |
| Nudt7     | 0,038603 | -0,03287 | 0,117 | 0,153 | 1 |
| Gm45250   | 0,03865  | -0,0204  | 0,026 | 0,046 | 1 |
| Fam178b   | 0,038694 | 0,033791 | 0,098 | 0,068 | 1 |
| Dnm1      | 0,038705 | -0,02174 | 0,016 | 0,031 | 1 |
| Prkaa1    | 0,038784 | -0,03804 | 0,262 | 0,312 | 1 |
| Mlip      | 0,03882  | -0,01088 | 0,007 | 0,018 | 1 |
| Akap9     | 0,038824 | -0,03088 | 0,778 | 0,842 | 1 |
| Tril      | 0,038833 | -0,00963 | 0,005 | 0,015 | 1 |
| Gm16183   | 0,038833 | -0,00963 | 0,005 | 0,015 | 1 |
| Gramd4    | 0,038842 | -0,03921 | 0,132 | 0,169 | 1 |
| Ccnyl1    | 0,038842 | -0,02936 | 0,212 | 0,259 | 1 |
| Pts       | 0,038866 | -0,04726 | 0,269 | 0,314 | 1 |
| Khdrbs3   | 0,03897  | -0,05328 | 0,263 | 0,306 | 1 |
| Cycs      | 0,038987 | -0,05086 | 0,738 | 0,78  | 1 |
| Arxes2    | 0,039038 | -0,01186 | 0,006 | 0,016 | 1 |
| Dynl1     | 0,039094 | 0,063683 | 0,995 | 0,993 | 1 |
| Spag5     | 0,039122 | -0,00866 | 0,005 | 0,015 | 1 |
| Fus       | 0,03919  | 0,054205 | 0,989 | 0,99  | 1 |
| Btbd3     | 0,039203 | -0,06687 | 0,354 | 0,398 | 1 |
| Mapre3    | 0,039214 | 0,052186 | 0,59  | 0,546 | 1 |
| Serpinb1b | 0,039218 | -0,01026 | 0,006 | 0,016 | 1 |
| Eef2      | 0,039259 | 0,051948 | 0,999 | 1     | 1 |
| B3galnt2  | 0,039263 | -0,02842 | 0,095 | 0,128 | 1 |
| Gm597     | 0,039276 | -0,00956 | 0,007 | 0,018 | 1 |
| Ulk2      | 0,039277 | -0,05747 | 0,558 | 0,611 | 1 |
| Klhdc10   | 0,039302 | -0,03979 | 0,199 | 0,246 | 1 |
| Itm2c     | 0,039311 | 0,048222 | 0,941 | 0,935 | 1 |
| Hyou1     | 0,039336 | -0,04757 | 0,248 | 0,298 | 1 |
| Slc27a3   | 0,03934  | -0,01088 | 0,006 | 0,016 | 1 |
| Rgs11     | 0,039447 | -0,00893 | 0,007 | 0,018 | 1 |
| Porcn     | 0,039468 | -0,02382 | 0,212 | 0,262 | 1 |
| Gm21284   | 0,039521 | 0,006846 | 0,007 | 0     | 1 |
| Gm47071   | 0,039521 | 0,006846 | 0,007 | 0     | 1 |

|          |          |          |       |       |   |
|----------|----------|----------|-------|-------|---|
| Phldb3   | 0,039521 | 0,00782  | 0,007 | 0     | 1 |
| Dnhd1    | 0,039521 | 0,00782  | 0,007 | 0     | 1 |
| Lrrc63   | 0,039521 | 0,00782  | 0,007 | 0     | 1 |
| Spata19  | 0,039521 | 0,009766 | 0,007 | 0     | 1 |
| Gm47319  | 0,039521 | 0,009766 | 0,007 | 0     | 1 |
| Lag3     | 0,039521 | 0,011707 | 0,007 | 0     | 1 |
| Itga2    | 0,039521 | 0,010737 | 0,007 | 0     | 1 |
| Gm6793   | 0,039707 | -0,00476 | 0,005 | 0,015 | 1 |
| Ap2m1    | 0,039777 | 0,041589 | 0,937 | 0,928 | 1 |
| Pld1     | 0,039797 | -0,06939 | 0,346 | 0,387 | 1 |
| Pcsk6    | 0,039804 | -0,07263 | 0,602 | 0,616 | 1 |
| Lsamp    | 0,03985  | -0,03694 | 0,071 | 0,099 | 1 |
| Coq10a   | 0,039861 | -0,05055 | 0,379 | 0,429 | 1 |
| Tcf7l2   | 0,039934 | -0,0437  | 0,29  | 0,346 | 1 |
| Actr8    | 0,03994  | -0,03969 | 0,342 | 0,395 | 1 |
| Ifnar1   | 0,039946 | -0,03106 | 0,242 | 0,289 | 1 |
| Uqcrfs1  | 0,039963 | -0,04166 | 0,669 | 0,707 | 1 |
| Washc3   | 0,039977 | -0,02811 | 0,26  | 0,312 | 1 |
| Polr2h   | 0,040003 | 0,055017 | 0,297 | 0,254 | 1 |
| Limd1    | 0,040078 | -0,03847 | 0,438 | 0,494 | 1 |
| Trp53rkb | 0,040081 | -0,02773 | 0,084 | 0,115 | 1 |
| Ubl7     | 0,040106 | -0,05325 | 0,369 | 0,415 | 1 |
| Nr2c2    | 0,040113 | -0,03932 | 0,473 | 0,528 | 1 |
| Ndrgr1   | 0,040229 | 0,04896  | 0,999 | 1     | 1 |
| Fabp5    | 0,040277 | -0,07317 | 0,996 | 0,995 | 1 |
| Ankib1   | 0,040336 | -0,05598 | 0,797 | 0,831 | 1 |
| Eea1     | 0,040442 | -0,03915 | 0,5   | 0,572 | 1 |
| Calu     | 0,040451 | 0,064252 | 0,488 | 0,454 | 1 |
| Dcaf11   | 0,040457 | -0,04346 | 0,444 | 0,501 | 1 |
| Cmc1     | 0,040473 | -0,04925 | 0,349 | 0,393 | 1 |
| Ninj2    | 0,040534 | -0,04305 | 0,612 | 0,662 | 1 |
| Rbm26    | 0,040541 | -0,04203 | 0,613 | 0,66  | 1 |
| Srrm2    | 0,040551 | -0,03747 | 0,995 | 0,992 | 1 |
| Slc35a2  | 0,040586 | -0,05055 | 0,617 | 0,663 | 1 |
| Cks1b    | 0,040614 | 0,01841  | 0,044 | 0,024 | 1 |
| Rps6ka4  | 0,040714 | 0,045092 | 0,225 | 0,184 | 1 |
| Zfp626   | 0,040784 | -0,02595 | 0,161 | 0,202 | 1 |
| Kat2a    | 0,04087  | -0,04252 | 0,174 | 0,215 | 1 |
| Coasy    | 0,040891 | -0,06044 | 0,408 | 0,45  | 1 |
| Gm20300  | 0,040937 | -0,05091 | 0,353 | 0,405 | 1 |
| Gm49322  | 0,040952 | 0,026924 | 0,092 | 0,063 | 1 |
| Dennd5b  | 0,040954 | -0,05339 | 0,529 | 0,572 | 1 |
| Ermp1    | 0,040978 | -0,05396 | 0,902 | 0,927 | 1 |
| Arl6ip1  | 0,041115 | -0,03549 | 0,991 | 0,984 | 1 |
| Cdk8     | 0,041291 | -0,04404 | 0,202 | 0,244 | 1 |
| Tnfaip6  | 0,041303 | 0,086638 | 0,939 | 0,925 | 1 |
| Osgin2   | 0,041401 | -0,03039 | 0,235 | 0,283 | 1 |
| Nectin1  | 0,04146  | 0,069348 | 0,552 | 0,499 | 1 |
| Cnn3     | 0,041475 | -0,04856 | 0,757 | 0,793 | 1 |
| Myl6b    | 0,041489 | 0,020077 | 0,065 | 0,041 | 1 |
| Gapdh    | 0,041507 | 0,052216 | 0,998 | 0,998 | 1 |
| Brip1os  | 0,041591 | -0,0438  | 0,172 | 0,211 | 1 |

|           |          |          |       |       |   |
|-----------|----------|----------|-------|-------|---|
| Rpn1      | 0,041668 | -0,05243 | 0,774 | 0,813 | 1 |
| Mtg1      | 0,041696 | -0,03777 | 0,161 | 0,2   | 1 |
| Slc37a3   | 0,041732 | -0,0268  | 0,254 | 0,306 | 1 |
| Zkscan8   | 0,041771 | -0,03334 | 0,172 | 0,213 | 1 |
| Cdk7      | 0,041776 | 0,045608 | 0,224 | 0,182 | 1 |
| Limch1    | 0,041848 | 0,049274 | 0,976 | 0,974 | 1 |
| Vamp5     | 0,041862 | 0,085884 | 0,472 | 0,434 | 1 |
| 1110002LC | 0,041904 | -0,03688 | 0,101 | 0,133 | 1 |
| Zfp866    | 0,04197  | -0,02464 | 0,178 | 0,223 | 1 |
| Zfp617    | 0,042026 | -0,06572 | 0,212 | 0,25  | 1 |
| Thoc2     | 0,042033 | -0,06116 | 0,631 | 0,68  | 1 |
| Ispd      | 0,04213  | -0,0395  | 0,193 | 0,237 | 1 |
| Ephx4     | 0,042139 | 0,027987 | 0,052 | 0,031 | 1 |
| Spag7     | 0,042199 | -0,07335 | 0,514 | 0,553 | 1 |
| Wipf2     | 0,042235 | -0,06346 | 0,418 | 0,459 | 1 |
| Sspo      | 0,042238 | 0,052237 | 0,159 | 0,124 | 1 |
| Sorl1     | 0,042317 | -0,04765 | 0,695 | 0,727 | 1 |
| Trafd1    | 0,042404 | -0,03727 | 0,217 | 0,262 | 1 |
| Vcl       | 0,042493 | -0,03281 | 0,087 | 0,119 | 1 |
| Gemin8    | 0,042516 | -0,04115 | 0,148 | 0,185 | 1 |
| Samhd1    | 0,042528 | 0,078573 | 0,39  | 0,35  | 1 |
| Spats2l   | 0,042532 | -0,03652 | 0,192 | 0,236 | 1 |
| Nutf2     | 0,042596 | 0,039157 | 0,185 | 0,146 | 1 |
| Magohb    | 0,042666 | -0,04228 | 0,136 | 0,172 | 1 |
| Lpcat3    | 0,042693 | -0,04312 | 0,25  | 0,298 | 1 |
| Cmtm3     | 0,042732 | 0,034042 | 0,141 | 0,106 | 1 |
| Ostf1     | 0,042811 | -0,05345 | 0,348 | 0,395 | 1 |
| Trim39    | 0,042832 | -0,03857 | 0,199 | 0,246 | 1 |
| Phldb1    | 0,042871 | 0,066573 | 0,98  | 0,98  | 1 |
| Manbal    | 0,042873 | -0,0514  | 0,551 | 0,6   | 1 |
| Ddx42     | 0,042894 | 0,06653  | 0,492 | 0,454 | 1 |
| Pla2g7    | 0,042918 | -0,01424 | 0,015 | 0,029 | 1 |
| Ykt6      | 0,042962 | -0,04849 | 0,315 | 0,363 | 1 |
| Wwc2      | 0,043013 | -0,03602 | 0,3   | 0,351 | 1 |
| Prpf4b    | 0,04308  | -0,04297 | 0,87  | 0,899 | 1 |
| Atp1a1    | 0,043088 | 0,057973 | 0,993 | 0,992 | 1 |
| Rfk       | 0,043117 | -0,03868 | 0,347 | 0,397 | 1 |
| Zbtb24    | 0,04324  | -0,03529 | 0,139 | 0,177 | 1 |
| Rbbp5     | 0,043262 | -0,03525 | 0,256 | 0,301 | 1 |
| Nmu       | 0,043308 | 0,027185 | 0,024 | 0,01  | 1 |
| Mtx1      | 0,043309 | -0,04482 | 0,295 | 0,345 | 1 |
| Msl3      | 0,043363 | -0,04213 | 0,326 | 0,377 | 1 |
| Tab2      | 0,043398 | -0,06369 | 0,663 | 0,689 | 1 |
| Lymr2     | 0,043409 | -0,04631 | 0,347 | 0,393 | 1 |
| Scp2      | 0,043475 | 0,047154 | 0,93  | 0,917 | 1 |
| Nudt3     | 0,043551 | -0,03719 | 0,825 | 0,878 | 1 |
| Wdtdc1    | 0,043622 | -0,04602 | 0,362 | 0,415 | 1 |
| Fbxl21    | 0,043797 | -0,01231 | 0,026 | 0,044 | 1 |
| Mlycd     | 0,043798 | -0,03389 | 0,244 | 0,293 | 1 |
| Msi2      | 0,043806 | -0,0546  | 0,645 | 0,678 | 1 |
| Prnp      | 0,043852 | 0,039116 | 0,994 | 1     | 1 |
| Cuedc1    | 0,043941 | -0,05105 | 0,706 | 0,764 | 1 |

|           |          |          |       |       |   |
|-----------|----------|----------|-------|-------|---|
| Atp5f1    | 0,043965 | -0,04049 | 0,943 | 0,941 | 1 |
| Jade1     | 0,044036 | 0,06506  | 0,52  | 0,473 | 1 |
| Fam102a   | 0,044075 | 0,062098 | 0,924 | 0,927 | 1 |
| Rhoj      | 0,044097 | 0,079611 | 0,294 | 0,254 | 1 |
| Kank3     | 0,044102 | 0,014529 | 0,024 | 0,01  | 1 |
| Pibf1     | 0,044172 | -0,03034 | 0,368 | 0,431 | 1 |
| Rps6ka1   | 0,044239 | -0,04917 | 0,261 | 0,302 | 1 |
| Acox1     | 0,044241 | 0,072572 | 0,658 | 0,624 | 1 |
| Bche      | 0,04433  | -0,03636 | 0,286 | 0,337 | 1 |
| Zcchc7    | 0,044396 | -0,07598 | 0,801 | 0,824 | 1 |
| Brinp3    | 0,04449  | -0,02429 | 0,033 | 0,054 | 1 |
| Lbr       | 0,044501 | -0,06464 | 0,533 | 0,584 | 1 |
| Slc25a17  | 0,044537 | -0,02858 | 0,289 | 0,34  | 1 |
| Banf2os   | 0,044538 | 0,024919 | 0,03  | 0,015 | 1 |
| Ptpn1     | 0,044669 | -0,04816 | 0,336 | 0,384 | 1 |
| Slc6a6    | 0,044726 | 0,037541 | 0,94  | 0,93  | 1 |
| Exosc2    | 0,044801 | -0,05456 | 0,214 | 0,255 | 1 |
| Tox3      | 0,044835 | -0,03209 | 0,025 | 0,042 | 1 |
| Snu13     | 0,044853 | 0,052178 | 0,922 | 0,878 | 1 |
| Ndufb10   | 0,044911 | -0,04719 | 0,891 | 0,906 | 1 |
| Erp44     | 0,044962 | -0,0469  | 0,434 | 0,481 | 1 |
| Stmn3     | 0,044976 | -0,03046 | 0,048 | 0,072 | 1 |
| Ddt       | 0,044982 | -0,04443 | 0,536 | 0,579 | 1 |
| 4932422M  | 0,045041 | 0,03546  | 0,068 | 0,044 | 1 |
| Rad23b    | 0,045155 | 0,071588 | 0,566 | 0,537 | 1 |
| Arglu1    | 0,045161 | -0,04654 | 0,935 | 0,951 | 1 |
| N6amt1    | 0,045166 | -0,03542 | 0,19  | 0,234 | 1 |
| Pabpc5    | 0,045352 | -0,01678 | 0,014 | 0,028 | 1 |
| Traf4     | 0,045352 | -0,01678 | 0,014 | 0,028 | 1 |
| Pum1      | 0,045365 | 0,070769 | 0,774 | 0,75  | 1 |
| Tmsb15b1  | 0,045421 | -0,0302  | 0,066 | 0,093 | 1 |
| Pgap1     | 0,04567  | -0,05367 | 0,402 | 0,45  | 1 |
| Tob2      | 0,045681 | 0,106744 | 0,672 | 0,65  | 1 |
| Lrp11     | 0,045684 | -0,01968 | 0,033 | 0,054 | 1 |
| Cux1      | 0,045705 | 0,085356 | 0,58  | 0,566 | 1 |
| Lrrc20    | 0,045714 | -0,02347 | 0,056 | 0,081 | 1 |
| Osbpl1a   | 0,045718 | -0,04216 | 0,985 | 0,989 | 1 |
| Dcaf10    | 0,045722 | -0,03024 | 0,17  | 0,211 | 1 |
| Knop1     | 0,045812 | 0,069457 | 0,649 | 0,6   | 1 |
| Wdr48     | 0,045814 | -0,03374 | 0,343 | 0,397 | 1 |
| AC126055. | 0,045914 | -0,0198  | 0,025 | 0,042 | 1 |
| Kif16b    | 0,045986 | -0,03331 | 0,235 | 0,283 | 1 |
| Cnep1r1   | 0,046004 | -0,03903 | 0,443 | 0,506 | 1 |
| Marcksl1  | 0,046026 | 0,082589 | 0,807 | 0,771 | 1 |
| Vangl1    | 0,046036 | -0,03136 | 0,069 | 0,096 | 1 |
| Tbcb      | 0,046037 | -0,05052 | 0,86  | 0,873 | 1 |
| Katnal1   | 0,046039 | 0,069775 | 0,57  | 0,535 | 1 |
| Myl12b    | 0,046045 | -0,04176 | 0,603 | 0,647 | 1 |
| Caskin2   | 0,046057 | -0,04992 | 0,297 | 0,341 | 1 |
| Gpbp1l1   | 0,046061 | -0,04015 | 0,528 | 0,582 | 1 |
| Aff2      | 0,046346 | -0,0144  | 0,02  | 0,036 | 1 |
| Anxa4     | 0,046365 | 0,049858 | 0,269 | 0,224 | 1 |



|           |          |          |       |       |   |
|-----------|----------|----------|-------|-------|---|
| Vps18     | 0,046383 | -0,0351  | 0,24  | 0,286 | 1 |
| Pcdhga5   | 0,046419 | -0,03037 | 0,066 | 0,093 | 1 |
| 2310009B: | 0,046443 | -0,02708 | 0,121 | 0,156 | 1 |
| Pcdhga3   | 0,046472 | -0,01265 | 0,014 | 0,028 | 1 |
| Def8      | 0,046496 | -0,05164 | 0,219 | 0,26  | 1 |
| Rhoq      | 0,046501 | -0,03624 | 0,266 | 0,315 | 1 |
| Gm15688   | 0,046587 | -0,02651 | 0,066 | 0,093 | 1 |
| Nubp2     | 0,04676  | -0,04233 | 0,397 | 0,452 | 1 |
| Slc2a8    | 0,046821 | -0,03782 | 0,198 | 0,239 | 1 |
| Bax       | 0,04689  | -0,03281 | 0,724 | 0,777 | 1 |
| Tfdp2     | 0,046903 | -0,04535 | 0,599 | 0,642 | 1 |
| Dkc1      | 0,046916 | 0,071982 | 0,323 | 0,285 | 1 |
| Psd3      | 0,047014 | -0,05447 | 0,5   | 0,546 | 1 |
| Mtmr10    | 0,047027 | -0,04449 | 0,628 | 0,685 | 1 |
| Stx4a     | 0,047072 | 0,053266 | 0,816 | 0,798 | 1 |
| Cstb      | 0,047145 | 0,062619 | 0,792 | 0,741 | 1 |
| Dnajc10   | 0,04716  | -0,03573 | 0,354 | 0,413 | 1 |
| Shisa8    | 0,04721  | 0,095591 | 0,274 | 0,236 | 1 |
| Gm31152   | 0,047241 | -0,01091 | 0,02  | 0,036 | 1 |
| Tceal9    | 0,047274 | 0,073745 | 0,58  | 0,55  | 1 |
| Slc25a47  | 0,047315 | -0,01611 | 0,025 | 0,042 | 1 |
| Prickle1  | 0,047329 | 0,140868 | 0,458 | 0,433 | 1 |
| Stub1     | 0,047419 | -0,04294 | 0,736 | 0,78  | 1 |
| Mrps6     | 0,047518 | -0,04968 | 0,581 | 0,621 | 1 |
| Kif3a     | 0,04756  | 0,067577 | 0,887 | 0,889 | 1 |
| Shprh     | 0,047622 | -0,05928 | 0,478 | 0,527 | 1 |
| Pcna-ps2  | 0,047628 | 0,018469 | 0,041 | 0,023 | 1 |
| Rcc2      | 0,047759 | -0,01689 | 0,188 | 0,233 | 1 |
| Hoxd3     | 0,047821 | 0,013608 | 0,016 | 0,005 | 1 |
| Pgd       | 0,047824 | -0,03244 | 0,256 | 0,304 | 1 |
| Atg2b     | 0,047866 | -0,01716 | 0,186 | 0,233 | 1 |
| Jade2     | 0,047906 | -0,0502  | 0,21  | 0,247 | 1 |
| Tacc3     | 0,047908 | -0,0275  | 0,111 | 0,145 | 1 |
| Gab3      | 0,047987 | 0,019669 | 0,016 | 0,005 | 1 |
| Dpf2      | 0,048106 | -0,03724 | 0,458 | 0,524 | 1 |
| 5430416Nl | 0,04814  | -0,03564 | 0,118 | 0,151 | 1 |
| Abhd13    | 0,048144 | -0,03495 | 0,142 | 0,179 | 1 |
| Rnf38     | 0,048231 | -0,0377  | 0,31  | 0,359 | 1 |
| Sart1     | 0,048331 | -0,04963 | 0,369 | 0,418 | 1 |
| Commd1    | 0,048357 | -0,05117 | 0,726 | 0,766 | 1 |
| Zc3h7a    | 0,04836  | -0,05002 | 0,327 | 0,376 | 1 |
| Stard9    | 0,048409 | -0,0433  | 0,239 | 0,283 | 1 |
| Rbm48     | 0,04842  | -0,04394 | 0,257 | 0,302 | 1 |
| Negr1     | 0,048441 | -0,05015 | 0,216 | 0,257 | 1 |
| Snx6      | 0,048543 | -0,04127 | 0,787 | 0,811 | 1 |
| Crlf3     | 0,048561 | -0,05122 | 0,267 | 0,312 | 1 |
| Myo1e     | 0,048596 | 0,063699 | 0,599 | 0,566 | 1 |
| Hmgxb4    | 0,048694 | -0,03835 | 0,316 | 0,371 | 1 |
| Gcat      | 0,048747 | -0,05052 | 0,289 | 0,337 | 1 |
| Nr4a2     | 0,048749 | 0,025295 | 0,016 | 0,005 | 1 |
| Derl2     | 0,048844 | -0,05289 | 0,467 | 0,512 | 1 |
| Fdxr      | 0,048844 | -0,03534 | 0,365 | 0,418 | 1 |

|           |          |          |       |       |   |
|-----------|----------|----------|-------|-------|---|
| Ddx17     | 0,049057 | -0,05023 | 0,873 | 0,878 | 1 |
| Stard5    | 0,049157 | -0,04276 | 0,158 | 0,195 | 1 |
| Selenoh   | 0,049165 | -0,0394  | 0,368 | 0,421 | 1 |
| Csrp1     | 0,049169 | -0,04586 | 0,999 | 1     | 1 |
| Fam49b    | 0,049265 | -0,0464  | 0,634 | 0,688 | 1 |
| St3gal5   | 0,049305 | -0,05982 | 0,44  | 0,483 | 1 |
| Atp6v1a   | 0,049335 | -0,05105 | 0,842 | 0,86  | 1 |
| Gm42726   | 0,049431 | 0,053656 | 0,18  | 0,145 | 1 |
| Akap12    | 0,049449 | 0,035243 | 0,026 | 0,011 | 1 |
| Rasgef1c  | 0,049455 | -0,02191 | 0,036 | 0,057 | 1 |
| Slc38a1   | 0,0495   | -0,02063 | 0,028 | 0,047 | 1 |
| Tsga10    | 0,049501 | -0,04361 | 0,212 | 0,259 | 1 |
| Lamtor3   | 0,049507 | -0,04017 | 0,354 | 0,407 | 1 |
| Camk2d    | 0,049521 | 0,072562 | 0,232 | 0,193 | 1 |
| Sh2b2     | 0,04963  | -0,01571 | 0,019 | 0,034 | 1 |
| Stt3a     | 0,049675 | 0,068255 | 0,684 | 0,644 | 1 |
| Trim25    | 0,049753 | 0,04074  | 0,122 | 0,091 | 1 |
| Dcc       | 0,04976  | -0,03023 | 0,039 | 0,06  | 1 |
| Washc4    | 0,049818 | -0,06102 | 0,644 | 0,673 | 1 |
| Fbxl12    | 0,049823 | -0,03251 | 0,225 | 0,27  | 1 |
| Dgkz      | 0,049827 | 0,06841  | 0,429 | 0,392 | 1 |
| Hes7      | 0,049877 | 0,011052 | 0,01  | 0,002 | 1 |
| Olfr90    | 0,049921 | 0,010083 | 0,01  | 0,002 | 1 |
| Azin2     | 0,049921 | 0,011052 | 0,01  | 0,002 | 1 |
| Mettl7a3  | 0,049921 | 0,011052 | 0,01  | 0,002 | 1 |
| B9d1os    | 0,049965 | 0,009112 | 0,01  | 0,002 | 1 |
| Rfwd3     | 0,049977 | -0,0381  | 0,282 | 0,328 | 1 |
| Slc4a10   | 0,049998 | -0,02502 | 0,027 | 0,046 | 1 |
| A3galt2   | 0,050009 | 0,008141 | 0,01  | 0,002 | 1 |
| Rarres2   | 0,050009 | 0,008141 | 0,01  | 0,002 | 1 |
| Szrd1     | 0,050013 | -0,03907 | 0,379 | 0,429 | 1 |
| Ppt2      | 0,050068 | -0,03913 | 0,231 | 0,275 | 1 |
| Zc3h15    | 0,050069 | -0,05113 | 0,702 | 0,751 | 1 |
| Gm12185   | 0,050078 | -0,0247  | 0,001 | 0,007 | 1 |
| Otud6b    | 0,050126 | -0,06664 | 0,437 | 0,476 | 1 |
| Ttn       | 0,050211 | -0,01194 | 0,001 | 0,007 | 1 |
| Sh2d3c    | 0,050235 | 0,011366 | 0,01  | 0,002 | 1 |
| Senp5     | 0,050245 | -0,03334 | 0,334 | 0,384 | 1 |
| Gm45411   | 0,050277 | -0,00712 | 0,001 | 0,007 | 1 |
| Elavl2    | 0,050277 | -0,00873 | 0,001 | 0,007 | 1 |
| 1700110C: | 0,050277 | -0,01034 | 0,001 | 0,007 | 1 |
| Tnfrsf11a | 0,050343 | -0,0055  | 0,001 | 0,007 | 1 |
| Fam163a   | 0,050343 | -0,0055  | 0,001 | 0,007 | 1 |
| Lbp       | 0,050343 | -0,0055  | 0,001 | 0,007 | 1 |
| Sema4a    | 0,050343 | -0,0055  | 0,001 | 0,007 | 1 |
| Adgrl2    | 0,050343 | -0,0055  | 0,001 | 0,007 | 1 |
| Ube4bos1  | 0,050343 | -0,0055  | 0,001 | 0,007 | 1 |
| 4930540M  | 0,050343 | -0,0055  | 0,001 | 0,007 | 1 |
| Lmo3      | 0,050343 | -0,0055  | 0,001 | 0,007 | 1 |
| Me3       | 0,050343 | -0,0055  | 0,001 | 0,007 | 1 |
| Dnah3     | 0,050343 | -0,0055  | 0,001 | 0,007 | 1 |
| Gm26614   | 0,050343 | -0,0055  | 0,001 | 0,007 | 1 |

|           |          |          |       |       |   |
|-----------|----------|----------|-------|-------|---|
| Gm16170   | 0,050343 | -0,0055  | 0,001 | 0,007 | 1 |
| Hist1h4j  | 0,050343 | -0,0055  | 0,001 | 0,007 | 1 |
| Gm26555   | 0,050343 | -0,0055  | 0,001 | 0,007 | 1 |
| Gm807     | 0,050343 | -0,0055  | 0,001 | 0,007 | 1 |
| Olfr63    | 0,050343 | -0,0055  | 0,001 | 0,007 | 1 |
| Gm30198   | 0,050414 | 0,00749  | 0,01  | 0,002 | 1 |
| 2210406O  | 0,050441 | 0,022949 | 0,034 | 0,018 | 1 |
| Tubg1     | 0,050469 | -0,0521  | 0,248 | 0,288 | 1 |
| Eif1ax    | 0,050473 | -0,05117 | 0,685 | 0,719 | 1 |
| Gabra3    | 0,05056  | -0,02538 | 0,024 | 0,041 | 1 |
| Plpp3     | 0,050563 | 0,120721 | 0,699 | 0,694 | 1 |
| Hint1     | 0,050603 | -0,03826 | 0,971 | 0,976 | 1 |
| Reep1     | 0,05061  | -0,00516 | 0,001 | 0,007 | 1 |
| Tubb6     | 0,050673 | 0,014263 | 0,013 | 0,003 | 1 |
| Fbxl19    | 0,050676 | -0,03889 | 0,132 | 0,166 | 1 |
| Mtx2      | 0,050698 | 0,060738 | 0,555 | 0,528 | 1 |
| Col2a1    | 0,050738 | -0,01956 | 0,032 | 0,052 | 1 |
| Spef1     | 0,050904 | 0,012333 | 0,013 | 0,003 | 1 |
| 2610507B: | 0,050934 | -0,06133 | 0,642 | 0,667 | 1 |
| Gm21269   | 0,051059 | 0,00943  | 0,013 | 0,003 | 1 |
| Gm29325   | 0,051131 | -0,02887 | 0,079 | 0,107 | 1 |
| Nelfe     | 0,051154 | 0,060385 | 0,382 | 0,341 | 1 |
| Grk5      | 0,051222 | -0,01446 | 0,028 | 0,047 | 1 |
| Cdk9      | 0,05127  | 0,052451 | 0,405 | 0,363 | 1 |
| Emc1      | 0,051299 | 0,056145 | 0,743 | 0,715 | 1 |
| Herc3     | 0,051303 | -0,03567 | 0,083 | 0,112 | 1 |
| Tns1      | 0,051308 | 0,06356  | 0,339 | 0,296 | 1 |
| Gna12     | 0,051313 | 0,054104 | 0,997 | 0,998 | 1 |
| Stmn1     | 0,051338 | -0,04139 | 0,998 | 1     | 1 |
| Creld1    | 0,051343 | -0,04149 | 0,293 | 0,34  | 1 |
| Phb2      | 0,051359 | -0,06018 | 0,561 | 0,593 | 1 |
| Rpl38     | 0,051412 | 0,045086 | 0,997 | 0,997 | 1 |
| Mavs      | 0,051496 | -0,02408 | 0,136 | 0,174 | 1 |
| Tfip11    | 0,051533 | 0,052237 | 0,26  | 0,22  | 1 |
| Brca1     | 0,051534 | 0,016744 | 0,021 | 0,008 | 1 |
| 2310011JC | 0,051551 | -0,0502  | 0,551 | 0,593 | 1 |
| Abtb2     | 0,051635 | -0,03573 | 0,207 | 0,247 | 1 |
| Atg101    | 0,051636 | -0,0222  | 0,291 | 0,346 | 1 |
| Fam53b    | 0,051868 | 0,080511 | 0,861 | 0,844 | 1 |
| Phb       | 0,05194  | 0,039378 | 0,602 | 0,553 | 1 |
| Nmb       | 0,05195  | -0,0159  | 0,036 | 0,057 | 1 |
| Strn      | 0,051996 | -0,0465  | 0,702 | 0,746 | 1 |
| Ing3      | 0,052021 | -0,0351  | 0,255 | 0,301 | 1 |
| Peli3     | 0,052038 | 0,015994 | 0,034 | 0,018 | 1 |
| Vamp8     | 0,052044 | 0,069718 | 0,341 | 0,298 | 1 |
| Eif5a     | 0,052085 | 0,048618 | 0,953 | 0,94  | 1 |
| Plxna1    | 0,052094 | 0,042341 | 0,152 | 0,119 | 1 |
| Tnrc6b    | 0,052342 | -0,05018 | 0,843 | 0,852 | 1 |
| Traf6     | 0,052366 | -0,04035 | 0,26  | 0,304 | 1 |
| S100a11   | 0,052633 | 0,02303  | 0,027 | 0,013 | 1 |
| Epdr1     | 0,052757 | -0,03449 | 0,423 | 0,483 | 1 |
| Rsl24d1   | 0,052777 | -0,04917 | 0,474 | 0,528 | 1 |

|          |          |          |       |       |   |
|----------|----------|----------|-------|-------|---|
| Tab3     | 0,05278  | -0,02286 | 0,065 | 0,091 | 1 |
| Gemin6   | 0,052788 | -0,03277 | 0,073 | 0,099 | 1 |
| Prmt3    | 0,052996 | -0,05615 | 0,257 | 0,299 | 1 |
| Hsd17b4  | 0,053019 | -0,04359 | 0,722 | 0,78  | 1 |
| Herpud2  | 0,053158 | -0,03387 | 0,519 | 0,571 | 1 |
| Gpr37l1  | 0,053226 | -0,01443 | 0,044 | 0,067 | 1 |
| Metap1   | 0,053237 | -0,03817 | 0,322 | 0,369 | 1 |
| Cenpj    | 0,05326  | -0,03495 | 0,066 | 0,091 | 1 |
| Ssrp1    | 0,053322 | 0,056935 | 0,485 | 0,446 | 1 |
| Zfp9     | 0,053387 | -0,03289 | 0,18  | 0,22  | 1 |
| Aktip    | 0,0534   | 0,054661 | 0,749 | 0,735 | 1 |
| Proser3  | 0,053408 | -0,02439 | 0,057 | 0,081 | 1 |
| Nemp1    | 0,053455 | 0,021781 | 0,053 | 0,033 | 1 |
| Nat9     | 0,053534 | -0,03401 | 0,354 | 0,407 | 1 |
| 1110059G | 0,053555 | -0,04144 | 0,313 | 0,359 | 1 |
| Zfp433   | 0,053655 | -0,00755 | 0,012 | 0,024 | 1 |
| Nme1     | 0,053716 | -0,04646 | 0,663 | 0,72  | 1 |
| Sgpl1    | 0,053748 | 0,052402 | 0,302 | 0,263 | 1 |
| Hadha    | 0,053765 | -0,05071 | 0,785 | 0,818 | 1 |
| Trmt10a  | 0,053949 | 0,048991 | 0,226 | 0,187 | 1 |
| Eef2kmt  | 0,053958 | -0,03594 | 0,157 | 0,193 | 1 |
| Tpra1    | 0,05397  | 0,031022 | 0,142 | 0,109 | 1 |
| Samd1    | 0,054061 | 0,051554 | 0,45  | 0,398 | 1 |
| Gm26917  | 0,054096 | 0,104908 | 0,496 | 0,478 | 1 |
| Fn3k     | 0,054156 | -0,06826 | 0,441 | 0,481 | 1 |
| Rtf2     | 0,054196 | -0,04371 | 0,628 | 0,659 | 1 |
| Pde4dip  | 0,054197 | -0,04109 | 0,667 | 0,72  | 1 |
| Tmem202  | 0,054265 | 0,022296 | 0,038 | 0,021 | 1 |
| Rufy3    | 0,054278 | -0,04022 | 0,931 | 0,961 | 1 |
| Mrpl28   | 0,05432  | -0,04496 | 0,526 | 0,572 | 1 |
| Il12a    | 0,054403 | -0,02581 | 0,046 | 0,068 | 1 |
| Dlg1     | 0,054404 | -0,05351 | 0,826 | 0,854 | 1 |
| Skp1a    | 0,054467 | -0,03515 | 0,843 | 0,855 | 1 |
| En2      | 0,054526 | -0,02116 | 0,223 | 0,27  | 1 |
| Cops3    | 0,054546 | -0,04227 | 0,55  | 0,59  | 1 |
| 2610021A | 0,054592 | -0,03512 | 0,159 | 0,197 | 1 |
| A330049N | 0,054617 | 0,06797  | 0,297 | 0,263 | 1 |
| Tulp4    | 0,054624 | 0,053372 | 0,999 | 1     | 1 |
| Tomm70a  | 0,054651 | -0,04046 | 0,43  | 0,486 | 1 |
| Crybg3   | 0,054854 | -0,10526 | 0,449 | 0,483 | 1 |
| Arf5     | 0,05493  | 0,05775  | 0,9   | 0,889 | 1 |
| Cdc42    | 0,054987 | 0,049338 | 0,992 | 0,99  | 1 |
| Fbxw17   | 0,055294 | -0,03609 | 0,278 | 0,328 | 1 |
| Adcy5    | 0,055317 | 0,062251 | 0,605 | 0,566 | 1 |
| Mdga2    | 0,055363 | -0,05311 | 0,533 | 0,563 | 1 |
| Tomm40   | 0,055439 | -0,0382  | 0,448 | 0,496 | 1 |
| Msantd4  | 0,055508 | 0,048108 | 0,344 | 0,301 | 1 |
| Tbc1d13  | 0,055598 | -0,03242 | 0,189 | 0,229 | 1 |
| Stk10    | 0,055621 | -0,02887 | 0,089 | 0,119 | 1 |
| Mcoln1   | 0,055624 | 0,06251  | 0,336 | 0,298 | 1 |
| Dcaf8    | 0,055747 | -0,03495 | 0,711 | 0,763 | 1 |
| Hmg20a   | 0,055759 | -0,03745 | 0,385 | 0,433 | 1 |

|           |          |          |       |       |   |
|-----------|----------|----------|-------|-------|---|
| Extl3     | 0,055816 | -0,05396 | 0,307 | 0,353 | 1 |
| Kdr       | 0,055851 | -0,02398 | 0,064 | 0,089 | 1 |
| Minos1    | 0,055858 | -0,03399 | 0,832 | 0,867 | 1 |
| Rps10     | 0,055922 | 0,038437 | 0,997 | 0,998 | 1 |
| Mapre2    | 0,055968 | -0,06763 | 0,898 | 0,902 | 1 |
| Cep126    | 0,056015 | -0,01722 | 0,039 | 0,06  | 1 |
| Anxa9     | 0,056017 | -0,01398 | 0,011 | 0,023 | 1 |
| Ddah1     | 0,056017 | -0,01398 | 0,011 | 0,023 | 1 |
| Tpst1     | 0,056135 | -0,0361  | 0,644 | 0,685 | 1 |
| Ano6      | 0,056152 | 0,022163 | 0,023 | 0,01  | 1 |
| Ocel1     | 0,056208 | 0,037711 | 0,127 | 0,096 | 1 |
| Arhgef2   | 0,056216 | 0,062393 | 0,934 | 0,915 | 1 |
| Sec11a    | 0,056242 | -0,03599 | 0,368 | 0,421 | 1 |
| Itgb1     | 0,056272 | 0,076153 | 0,756 | 0,738 | 1 |
| Slc35b1   | 0,056357 | -0,03836 | 0,571 | 0,626 | 1 |
| Scarb1    | 0,056373 | -0,03944 | 0,18  | 0,218 | 1 |
| Golga5    | 0,05639  | -0,04132 | 0,26  | 0,302 | 1 |
| Rbm38     | 0,056517 | 0,02501  | 0,023 | 0,01  | 1 |
| Ddah2     | 0,056522 | 0,078779 | 0,395 | 0,364 | 1 |
| Tnfsf12   | 0,056579 | 0,027621 | 0,09  | 0,063 | 1 |
| Gm26546   | 0,0567   | 0,017398 | 0,023 | 0,01  | 1 |
| 4933430I1 | 0,056735 | 0,005871 | 0,006 | 0     | 1 |
| Tnc       | 0,056735 | 0,005871 | 0,006 | 0     | 1 |
| Tes       | 0,056735 | 0,005871 | 0,006 | 0     | 1 |
| Gm3417    | 0,056735 | 0,005871 | 0,006 | 0     | 1 |
| Wdr93     | 0,056735 | 0,006846 | 0,006 | 0     | 1 |
| Uaca      | 0,056735 | 0,006846 | 0,006 | 0     | 1 |
| B430319H: | 0,056735 | 0,006846 | 0,006 | 0     | 1 |
| Tnnc1     | 0,056735 | 0,009766 | 0,006 | 0     | 1 |
| Lck       | 0,056735 | 0,008793 | 0,006 | 0     | 1 |
| Selplg    | 0,056735 | 0,008793 | 0,006 | 0     | 1 |
| Rnd1      | 0,056735 | 0,008793 | 0,006 | 0     | 1 |
| Nfatc1    | 0,056735 | 0,008793 | 0,006 | 0     | 1 |
| Rnf150    | 0,056735 | 0,009766 | 0,006 | 0     | 1 |
| Gm42756   | 0,056744 | -0,07376 | 0,366 | 0,41  | 1 |
| Snpc2     | 0,056759 | -0,03414 | 0,186 | 0,226 | 1 |
| Pola2     | 0,056905 | 0,0401   | 0,119 | 0,089 | 1 |
| Tecpr1    | 0,057209 | -0,04437 | 0,388 | 0,436 | 1 |
| Gtpbp8    | 0,057232 | -0,04292 | 0,15  | 0,185 | 1 |
| Ndufb11   | 0,057267 | 0,055671 | 0,949 | 0,94  | 1 |
| Eif4g2    | 0,057274 | -0,02898 | 0,995 | 0,998 | 1 |
| Smim3     | 0,057413 | -0,04148 | 0,069 | 0,094 | 1 |
| Pa2g4     | 0,057415 | -0,04571 | 0,688 | 0,743 | 1 |
| Igf2bp2   | 0,057416 | 0,023318 | 0,023 | 0,01  | 1 |
| Pdcd5     | 0,057521 | -0,03517 | 0,793 | 0,829 | 1 |
| Arhgef40  | 0,057522 | 0,040809 | 0,108 | 0,08  | 1 |
| Gm49359   | 0,057553 | -0,0546  | 0,104 | 0,135 | 1 |
| Rtn2      | 0,057638 | -0,0314  | 0,045 | 0,067 | 1 |
| Zfp467    | 0,05768  | 0,046704 | 0,191 | 0,154 | 1 |
| Sf3b2     | 0,057864 | 0,050482 | 0,962 | 0,963 | 1 |
| Praf2     | 0,057908 | 0,046509 | 0,498 | 0,454 | 1 |
| Dusp14    | 0,057915 | 0,017098 | 0,018 | 0,007 | 1 |

|            |          |          |       |       |   |
|------------|----------|----------|-------|-------|---|
| Wdr81      | 0,057962 | -0,03353 | 0,201 | 0,242 | 1 |
| 4932438A:  | 0,057979 | -0,05696 | 0,684 | 0,725 | 1 |
| Catsper2   | 0,05798  | -0,04815 | 0,124 | 0,154 | 1 |
| Map1lc3a   | 0,057985 | 0,06936  | 0,92  | 0,919 | 1 |
| Rexo5      | 0,058005 | -0,0185  | 0,03  | 0,049 | 1 |
| Cnih1      | 0,058041 | -0,04584 | 0,694 | 0,754 | 1 |
| Cttnbp2nl  | 0,058055 | -0,04726 | 0,5   | 0,548 | 1 |
| Slit2      | 0,058074 | 0,017289 | 0,029 | 0,015 | 1 |
| Cmc4       | 0,058076 | -0,03991 | 0,296 | 0,341 | 1 |
| Cdk15      | 0,058094 | 0,013877 | 0,018 | 0,007 | 1 |
| Ifit3b     | 0,058129 | -0,05504 | 0,01  | 0,021 | 1 |
| Tnfrsf19   | 0,058131 | -0,01526 | 0,017 | 0,031 | 1 |
| Pex26      | 0,05828  | 0,022121 | 0,067 | 0,044 | 1 |
| Mapt       | 0,058304 | 0,035598 | 0,999 | 1     | 1 |
| Mbtps1     | 0,05848  | -0,0198  | 0,475 | 0,54  | 1 |
| Fry        | 0,05851  | -0,04887 | 0,183 | 0,221 | 1 |
| Psmc2      | 0,058527 | 0,057831 | 0,841 | 0,831 | 1 |
| Dennd4a    | 0,058548 | -0,05319 | 0,52  | 0,564 | 1 |
| Tmem200c   | 0,058599 | 0,012611 | 0,018 | 0,007 | 1 |
| Crnk1l1    | 0,058603 | -0,04971 | 0,269 | 0,311 | 1 |
| Tcaf1      | 0,058657 | -0,04029 | 0,611 | 0,649 | 1 |
| Grik5      | 0,058725 | 0,040146 | 0,29  | 0,247 | 1 |
| Srpk2      | 0,058844 | -0,04364 | 0,7   | 0,756 | 1 |
| Ppp2r3a    | 0,058872 | -0,05161 | 0,92  | 0,937 | 1 |
| Synrg      | 0,058911 | -0,05804 | 0,657 | 0,709 | 1 |
| Ggh        | 0,058982 | 0,056397 | 0,537 | 0,501 | 1 |
| Dnajb6     | 0,059151 | -0,04463 | 0,857 | 0,88  | 1 |
| Fign       | 0,059183 | -0,04461 | 0,346 | 0,397 | 1 |
| Acot13     | 0,059291 | -0,03007 | 0,471 | 0,532 | 1 |
| Tecpr2     | 0,059316 | -0,03735 | 0,396 | 0,455 | 1 |
| Apbb2      | 0,059568 | -0,07036 | 0,889 | 0,889 | 1 |
| Smim1      | 0,059685 | -0,0689  | 0,559 | 0,582 | 1 |
| Gpm6a      | 0,059688 | -0,01239 | 0,01  | 0,021 | 1 |
| Lsm1       | 0,059716 | -0,03985 | 0,322 | 0,371 | 1 |
| Mtdh       | 0,059734 | -0,04968 | 0,963 | 0,974 | 1 |
| Samd8      | 0,059783 | -0,04814 | 0,763 | 0,807 | 1 |
| Mat2a      | 0,059819 | 0,076381 | 0,974 | 0,971 | 1 |
| Hist2h2aa1 | 0,059838 | 0,032108 | 0,076 | 0,052 | 1 |
| Wdfy3      | 0,059873 | -0,04651 | 0,676 | 0,724 | 1 |
| Spg11      | 0,059918 | -0,03126 | 0,217 | 0,262 | 1 |
| Hmgcll1    | 0,059934 | 0,010448 | 0,055 | 0,034 | 1 |
| Kantr      | 0,059942 | -0,0334  | 0,126 | 0,159 | 1 |
| Utp18      | 0,059961 | -0,02344 | 0,235 | 0,28  | 1 |
| Ctnnal1    | 0,059988 | -0,04233 | 0,332 | 0,38  | 1 |
| Dgkh       | 0,060025 | 0,022008 | 0,031 | 0,016 | 1 |
| Mrpl46     | 0,060124 | -0,04511 | 0,25  | 0,291 | 1 |
| Prkd2      | 0,060152 | 0,023437 | 0,044 | 0,026 | 1 |
| Gm19705    | 0,060249 | 0,032946 | 0,129 | 0,098 | 1 |
| Zdhhc13    | 0,060258 | -0,03388 | 0,093 | 0,122 | 1 |
| Acp2       | 0,060307 | -0,03577 | 0,302 | 0,35  | 1 |
| Igbbp1     | 0,060383 | -0,03629 | 0,418 | 0,475 | 1 |
| Trabd      | 0,060414 | -0,03708 | 0,301 | 0,345 | 1 |

|           |          |          |       |       |   |
|-----------|----------|----------|-------|-------|---|
| Lmnb1     | 0,060513 | 0,050667 | 0,129 | 0,099 | 1 |
| Ttc4      | 0,060552 | -0,04328 | 0,373 | 0,416 | 1 |
| Mrpl10    | 0,06068  | -0,03061 | 0,373 | 0,436 | 1 |
| Hoxa7     | 0,060736 | -0,02908 | 0,029 | 0,047 | 1 |
| Gm14410   | 0,060766 | 0,015742 | 0,031 | 0,016 | 1 |
| Arf3      | 0,060778 | -0,02839 | 0,422 | 0,475 | 1 |
| Eif4g3    | 0,060837 | -0,06333 | 0,596 | 0,633 | 1 |
| Gm32122   | 0,060895 | -0,21572 | 0,12  | 0,15  | 1 |
| Khk       | 0,060898 | -0,03151 | 0,122 | 0,154 | 1 |
| Trim47    | 0,060947 | 0,036898 | 0,058 | 0,037 | 1 |
| Dscr3     | 0,060968 | -0,03314 | 0,243 | 0,286 | 1 |
| Zfyve19   | 0,061052 | -0,02943 | 0,235 | 0,28  | 1 |
| Pigyl     | 0,061186 | -0,03635 | 0,867 | 0,901 | 1 |
| Hyal1     | 0,061201 | -0,02472 | 0,123 | 0,156 | 1 |
| Gtf2ird1  | 0,061206 | -0,04449 | 0,128 | 0,159 | 1 |
| Mid2      | 0,061233 | 0,042303 | 0,092 | 0,067 | 1 |
| Bmyc      | 0,061283 | -0,02763 | 0,674 | 0,746 | 1 |
| Rps6ka5   | 0,061292 | -0,06371 | 0,598 | 0,608 | 1 |
| BC029722  | 0,061313 | 0,037493 | 0,43  | 0,38  | 1 |
| Hs3st1    | 0,06135  | 0,081164 | 0,8   | 0,79  | 1 |
| Txndc16   | 0,061441 | -0,03444 | 0,882 | 0,881 | 1 |
| Chd6      | 0,061674 | -0,02915 | 0,714 | 0,767 | 1 |
| Ctnnd2    | 0,061701 | -0,01887 | 0,049 | 0,072 | 1 |
| Rtel1     | 0,061702 | -0,02093 | 0,063 | 0,088 | 1 |
| Ss18l2    | 0,061742 | -0,06058 | 0,761 | 0,785 | 1 |
| Mroh7     | 0,061819 | 0,027337 | 0,048 | 0,029 | 1 |
| Esrp1     | 0,061829 | -0,01642 | 0,016 | 0,029 | 1 |
| Srsf12    | 0,061849 | -0,02217 | 0,033 | 0,052 | 1 |
| Mcts2     | 0,061938 | -0,03325 | 0,139 | 0,174 | 1 |
| Rgs16     | 0,061953 | -0,03978 | 0,075 | 0,101 | 1 |
| Tmem41b   | 0,062073 | 0,099781 | 0,605 | 0,574 | 1 |
| Lypd6     | 0,062206 | 0,051887 | 0,158 | 0,125 | 1 |
| Snhg6     | 0,062299 | 0,041492 | 0,538 | 0,488 | 1 |
| Pola1     | 0,062329 | 0,040169 | 0,153 | 0,12  | 1 |
| Med1      | 0,062354 | -0,05345 | 0,485 | 0,528 | 1 |
| Supt5     | 0,062361 | 0,068728 | 0,522 | 0,475 | 1 |
| Snhg9     | 0,062444 | -0,02582 | 0,281 | 0,33  | 1 |
| Suclg1    | 0,062478 | -0,03404 | 0,651 | 0,707 | 1 |
| Spryd3    | 0,062528 | -0,03255 | 0,2   | 0,241 | 1 |
| Pkd2l1    | 0,062533 | -0,07665 | 0,145 | 0,179 | 1 |
| Josd1     | 0,062558 | -0,04204 | 0,164 | 0,2   | 1 |
| Slc25a14  | 0,062571 | -0,02127 | 0,185 | 0,228 | 1 |
| Trmt11    | 0,062608 | -0,02875 | 0,175 | 0,213 | 1 |
| Armc5     | 0,062714 | -0,01956 | 0,099 | 0,13  | 1 |
| Gm31812   | 0,062727 | 0,014834 | 0,025 | 0,011 | 1 |
| Gm17518   | 0,062727 | 0,014834 | 0,025 | 0,011 | 1 |
| Rer1      | 0,062756 | -0,02774 | 0,893 | 0,922 | 1 |
| Mkks      | 0,062762 | -0,03147 | 0,155 | 0,19  | 1 |
| 9330111Nl | 0,062809 | 0,041749 | 0,072 | 0,049 | 1 |
| Sgsm1     | 0,062905 | -0,01195 | 0,016 | 0,029 | 1 |
| Rdh5      | 0,063033 | 0,028143 | 0,104 | 0,076 | 1 |
| Cdc27     | 0,063136 | -0,04129 | 0,257 | 0,299 | 1 |

|           |          |          |       |       |   |
|-----------|----------|----------|-------|-------|---|
| Nup43     | 0,063148 | -0,02753 | 0,081 | 0,109 | 1 |
| Selenow   | 0,063438 | 0,037055 | 0,995 | 0,998 | 1 |
| Gm10602   | 0,063442 | -0,01053 | 0,009 | 0,02  | 1 |
| Ubn2      | 0,063447 | -0,04602 | 0,749 | 0,79  | 1 |
| Pcca      | 0,063488 | -0,04412 | 0,263 | 0,302 | 1 |
| Dnmt3b    | 0,0635   | -0,01353 | 0,016 | 0,029 | 1 |
| Epha10    | 0,063545 | -0,01335 | 0,026 | 0,042 | 1 |
| Lsm14a    | 0,063571 | 0,058057 | 0,605 | 0,561 | 1 |
| Spata5    | 0,063591 | -0,02183 | 0,108 | 0,14  | 1 |
| Fkbp1a    | 0,063591 | 0,051804 | 0,983 | 0,984 | 1 |
| Ap2a1     | 0,063626 | -0,05668 | 0,945 | 0,948 | 1 |
| Zfp11     | 0,063685 | -0,02003 | 0,052 | 0,075 | 1 |
| Utp4      | 0,063736 | 0,040821 | 0,139 | 0,109 | 1 |
| 4632415LC | 0,063794 | -0,04563 | 0,172 | 0,207 | 1 |
| Rbbp8     | 0,063918 | -0,00956 | 0,009 | 0,02  | 1 |
| Rad52     | 0,063965 | -0,02087 | 0,105 | 0,137 | 1 |
| Tmem237   | 0,064024 | -0,03982 | 0,396 | 0,447 | 1 |
| Sgce      | 0,064216 | -0,02844 | 0,658 | 0,706 | 1 |
| Rhoa      | 0,064223 | 0,029309 | 0,999 | 0,998 | 1 |
| Carmil3   | 0,064249 | -0,01427 | 0,112 | 0,145 | 1 |
| Cwf1911   | 0,064343 | -0,03272 | 0,13  | 0,163 | 1 |
| Cdc45     | 0,064354 | -0,01248 | 0,021 | 0,036 | 1 |
| Rbm25     | 0,06437  | 0,061215 | 0,956 | 0,946 | 1 |
| Ttc9      | 0,064398 | 0,055235 | 0,207 | 0,172 | 1 |
| Usp12     | 0,064412 | -0,03927 | 0,189 | 0,226 | 1 |
| Nxph1     | 0,064427 | -0,00775 | 0,002 | 0,008 | 1 |
| Nrn1      | 0,064427 | -0,00775 | 0,002 | 0,008 | 1 |
| Lst1      | 0,064427 | -0,00775 | 0,002 | 0,008 | 1 |
| Cnnm1     | 0,064427 | -0,00775 | 0,002 | 0,008 | 1 |
| Haus5     | 0,064446 | -0,03001 | 0,13  | 0,163 | 1 |
| Tnik      | 0,064449 | -0,04635 | 0,226 | 0,265 | 1 |
| Gm26890   | 0,064467 | -0,03778 | 0,371 | 0,426 | 1 |
| Zfp398    | 0,064517 | -0,02389 | 0,199 | 0,241 | 1 |
| Tm7sf3    | 0,064522 | -0,0462  | 0,934 | 0,954 | 1 |
| Cd83      | 0,064533 | 0,012644 | 0,015 | 0,005 | 1 |
| D630003V  | 0,064533 | 0,014571 | 0,015 | 0,005 | 1 |
| Sphkap    | 0,064565 | -0,00614 | 0,002 | 0,008 | 1 |
| Olfr1284  | 0,064565 | -0,00614 | 0,002 | 0,008 | 1 |
| Glod5     | 0,064565 | -0,00614 | 0,002 | 0,008 | 1 |
| Gpr143    | 0,064565 | -0,00614 | 0,002 | 0,008 | 1 |
| Mccc1os   | 0,064565 | -0,00614 | 0,002 | 0,008 | 1 |
| Lnx1      | 0,064565 | -0,00614 | 0,002 | 0,008 | 1 |
| Gm20635   | 0,064565 | -0,00614 | 0,002 | 0,008 | 1 |
| Slc7a10   | 0,064565 | -0,00614 | 0,002 | 0,008 | 1 |
| Cacna2d2  | 0,064565 | -0,00614 | 0,002 | 0,008 | 1 |
| Car10     | 0,064565 | -0,00614 | 0,002 | 0,008 | 1 |
| Gm48708   | 0,064565 | -0,00614 | 0,002 | 0,008 | 1 |
| 4833422C: | 0,064565 | -0,00614 | 0,002 | 0,008 | 1 |
| Gm48079   | 0,064565 | -0,00614 | 0,002 | 0,008 | 1 |
| Gm15941   | 0,064565 | -0,00614 | 0,002 | 0,008 | 1 |
| Scrt1     | 0,064565 | -0,00614 | 0,002 | 0,008 | 1 |
| Lca5l     | 0,064565 | -0,00614 | 0,002 | 0,008 | 1 |



|           |          |          |       |       |   |
|-----------|----------|----------|-------|-------|---|
| Aldh1a7   | 0,064565 | -0,00614 | 0,002 | 0,008 | 1 |
| Clta      | 0,064593 | 0,041718 | 0,962 | 0,958 | 1 |
| Coprs     | 0,064625 | -0,04582 | 0,194 | 0,231 | 1 |
| Cr2       | 0,064662 | 0,016494 | 0,015 | 0,005 | 1 |
| Fam98a    | 0,064702 | -0,0388  | 0,483 | 0,537 | 1 |
| Man2c1    | 0,064706 | -0,04259 | 0,278 | 0,32  | 1 |
| A430033K  | 0,064724 | -0,0332  | 0,109 | 0,14  | 1 |
| A430105I1 | 0,064845 | -0,04306 | 0,095 | 0,124 | 1 |
| Sp3os     | 0,064872 | -0,05683 | 0,254 | 0,293 | 1 |
| Snx20     | 0,064912 | -0,00516 | 0,002 | 0,008 | 1 |
| Prox2os   | 0,064912 | -0,00516 | 0,002 | 0,008 | 1 |
| 4632428C  | 0,064912 | -0,00516 | 0,002 | 0,008 | 1 |
| Ift20     | 0,065112 | -0,05176 | 0,698 | 0,738 | 1 |
| Tcf12     | 0,065278 | -0,05531 | 0,876 | 0,886 | 1 |
| Mtmr14    | 0,065328 | -0,02312 | 0,189 | 0,231 | 1 |
| Nudt10    | 0,06533  | -0,01991 | 0,055 | 0,078 | 1 |
| Brap      | 0,065332 | -0,04575 | 0,371 | 0,415 | 1 |
| Dot1l     | 0,065485 | 0,083994 | 0,502 | 0,476 | 1 |
| Timm21    | 0,065518 | -0,02909 | 0,27  | 0,317 | 1 |
| Pard6g    | 0,065553 | 0,027552 | 0,074 | 0,05  | 1 |
| Slc9b2    | 0,065569 | -0,06312 | 0,084 | 0,112 | 1 |
| 5033403F  | 0,065576 | 0,00813  | 0,015 | 0,005 | 1 |
| Hopx      | 0,065606 | -0,12865 | 0,645 | 0,65  | 1 |
| Hmgb2     | 0,065718 | -0,03326 | 0,126 | 0,158 | 1 |
| Pcdhgb4   | 0,065837 | -0,02655 | 0,084 | 0,112 | 1 |
| Aurkaip1  | 0,065866 | -0,03571 | 0,71  | 0,738 | 1 |
| Arhgap21  | 0,066008 | -0,04153 | 0,57  | 0,616 | 1 |
| Rdh10     | 0,066077 | 0,03034  | 0,078 | 0,054 | 1 |
| Apex1     | 0,066083 | -0,03634 | 0,122 | 0,153 | 1 |
| Rhobtb3   | 0,066091 | -0,04869 | 0,728 | 0,754 | 1 |
| Zfp141    | 0,066131 | -0,03477 | 0,092 | 0,12  | 1 |
| Vrk3      | 0,066187 | -0,03235 | 0,328 | 0,374 | 1 |
| Efnb3     | 0,066232 | -0,03116 | 0,997 | 1     | 1 |
| Eif2b1    | 0,066235 | -0,03715 | 0,28  | 0,324 | 1 |
| Zfp945    | 0,066321 | -0,03825 | 0,152 | 0,187 | 1 |
| Srxn1     | 0,066353 | 0,060636 | 0,204 | 0,171 | 1 |
| Tmx2      | 0,066439 | -0,05821 | 0,699 | 0,722 | 1 |
| Gabarapl1 | 0,066513 | -0,04589 | 0,882 | 0,915 | 1 |
| Sv2a      | 0,066524 | -0,04311 | 0,995 | 0,992 | 1 |
| Sncb      | 0,066548 | -0,0115  | 0,008 | 0,018 | 1 |
| Kpna6     | 0,066551 | -0,04474 | 0,334 | 0,377 | 1 |
| Tfeb      | 0,066578 | 0,057638 | 0,515 | 0,473 | 1 |
| Rbp1      | 0,066581 | 0,036856 | 0,07  | 0,047 | 1 |
| Inpp5k    | 0,066587 | -0,03057 | 0,284 | 0,33  | 1 |
| Dnm3os    | 0,066594 | -0,02567 | 0,054 | 0,076 | 1 |
| Zdhhc17   | 0,06671  | -0,05087 | 0,731 | 0,754 | 1 |
| Tfpi      | 0,066855 | -0,01556 | 0,008 | 0,018 | 1 |
| 5430425K  | 0,066893 | -0,00991 | 0,008 | 0,018 | 1 |
| Mnt       | 0,067101 | 0,053202 | 0,269 | 0,231 | 1 |
| Phpt1     | 0,067148 | 0,053844 | 0,609 | 0,563 | 1 |
| Cep135    | 0,067184 | -0,03479 | 0,138 | 0,172 | 1 |
| Ptprf     | 0,067283 | -0,06271 | 0,54  | 0,571 | 1 |

|          |          |          |       |       |   |
|----------|----------|----------|-------|-------|---|
| 2310033P | 0,067344 | -0,03455 | 0,314 | 0,361 | 1 |
| Wdr3     | 0,067347 | -0,02789 | 0,16  | 0,197 | 1 |
| Mcm9     | 0,06747  | -0,02233 | 0,149 | 0,185 | 1 |
| Cntrob   | 0,067476 | -0,02445 | 0,047 | 0,068 | 1 |
| Fgf11    | 0,067515 | 0,017343 | 0,026 | 0,013 | 1 |
| Msrbb1   | 0,067619 | -0,02922 | 0,763 | 0,782 | 1 |
| Prr18    | 0,067643 | 0,080351 | 0,869 | 0,847 | 1 |
| Mrpl53   | 0,06767  | 0,015138 | 0,026 | 0,013 | 1 |
| Park2    | 0,06768  | -0,03561 | 0,163 | 0,198 | 1 |
| Tmem189  | 0,067709 | -0,04804 | 0,929 | 0,948 | 1 |
| Lrrc4c   | 0,067913 | -0,0354  | 0,242 | 0,281 | 1 |
| Wasl     | 0,067963 | -0,05517 | 0,617 | 0,655 | 1 |
| Pak4     | 0,068    | -0,03272 | 0,124 | 0,156 | 1 |
| Narf     | 0,068033 | -0,03376 | 0,338 | 0,384 | 1 |
| Pid1     | 0,068076 | -0,00568 | 0,008 | 0,018 | 1 |
| Lims1    | 0,068093 | 0,06888  | 0,627 | 0,6   | 1 |
| Acy3     | 0,068175 | -0,03672 | 0,196 | 0,237 | 1 |
| Dis3l2   | 0,0682   | -0,05498 | 0,376 | 0,421 | 1 |
| Serpinh1 | 0,068358 | -0,02014 | 0,044 | 0,065 | 1 |
| Fzd3     | 0,068358 | -0,0405  | 0,152 | 0,185 | 1 |
| Tgif2    | 0,068495 | -0,0305  | 0,089 | 0,117 | 1 |
| Lrba     | 0,068576 | -0,02345 | 0,195 | 0,236 | 1 |
| Agpat3   | 0,068653 | -0,04086 | 0,883 | 0,902 | 1 |
| Asic4    | 0,068751 | -0,00325 | 0     | 0,003 | 1 |
| Rgs4     | 0,068751 | -0,00325 | 0     | 0,003 | 1 |
| Nectin4  | 0,068751 | -0,00325 | 0     | 0,003 | 1 |
| Kcnt1    | 0,068751 | -0,00325 | 0     | 0,003 | 1 |
| Zfp804a  | 0,068751 | -0,00325 | 0     | 0,003 | 1 |
| Il2rg    | 0,068751 | -0,00325 | 0     | 0,003 | 1 |
| Gm6377   | 0,068751 | -0,00325 | 0     | 0,003 | 1 |
| Gpr149   | 0,068751 | -0,00325 | 0     | 0,003 | 1 |
| Fstl5    | 0,068751 | -0,00325 | 0     | 0,003 | 1 |
| Adra2c   | 0,068751 | -0,00325 | 0     | 0,003 | 1 |
| Gm3519   | 0,068751 | -0,00325 | 0     | 0,003 | 1 |
| Mlxipl   | 0,068751 | -0,00325 | 0     | 0,003 | 1 |
| Col26a1  | 0,068751 | -0,00325 | 0     | 0,003 | 1 |
| Iqub     | 0,068751 | -0,00325 | 0     | 0,003 | 1 |
| Smo      | 0,068751 | -0,00325 | 0     | 0,003 | 1 |
| Grip2    | 0,068751 | -0,00325 | 0     | 0,003 | 1 |
| Cntn6    | 0,068751 | -0,00325 | 0     | 0,003 | 1 |
| Mrgprf   | 0,068751 | -0,00325 | 0     | 0,003 | 1 |
| Susd2    | 0,068751 | -0,00325 | 0     | 0,003 | 1 |
| Col18a1  | 0,068751 | -0,00325 | 0     | 0,003 | 1 |
| A930009A | 0,068751 | -0,00325 | 0     | 0,003 | 1 |
| Gm3636   | 0,068751 | -0,00325 | 0     | 0,003 | 1 |
| Rem2     | 0,068751 | -0,00325 | 0     | 0,003 | 1 |
| 9230110C | 0,068751 | -0,00325 | 0     | 0,003 | 1 |
| Bmper    | 0,068751 | -0,00325 | 0     | 0,003 | 1 |
| Elmod1   | 0,068751 | -0,00325 | 0     | 0,003 | 1 |
| Gm46123  | 0,068751 | -0,00325 | 0     | 0,003 | 1 |
| Celsr3   | 0,068751 | -0,00325 | 0     | 0,003 | 1 |
| Cacna1g  | 0,068751 | -0,00325 | 0     | 0,003 | 1 |

|          |          |          |       |       |   |
|----------|----------|----------|-------|-------|---|
| Krt222   | 0,068751 | -0,00325 | 0     | 0,003 | 1 |
| Ryr2     | 0,068751 | -0,00325 | 0     | 0,003 | 1 |
| Gm33195  | 0,068751 | -0,00325 | 0     | 0,003 | 1 |
| Fkbp1b   | 0,068751 | -0,00325 | 0     | 0,003 | 1 |
| Sostdc1  | 0,068751 | -0,00325 | 0     | 0,003 | 1 |
| Tunar    | 0,068751 | -0,00325 | 0     | 0,003 | 1 |
| Dennd3   | 0,068751 | -0,00325 | 0     | 0,003 | 1 |
| Acvrl1   | 0,068751 | -0,00325 | 0     | 0,003 | 1 |
| Krt1     | 0,068751 | -0,00325 | 0     | 0,003 | 1 |
| Neurl1b  | 0,068751 | -0,00325 | 0     | 0,003 | 1 |
| Kcng2    | 0,068751 | -0,00325 | 0     | 0,003 | 1 |
| Sall3    | 0,068751 | -0,00325 | 0     | 0,003 | 1 |
| Neto1    | 0,068751 | -0,00325 | 0     | 0,003 | 1 |
| Fads3    | 0,068751 | -0,00325 | 0     | 0,003 | 1 |
| Lbx1     | 0,068751 | -0,00325 | 0     | 0,003 | 1 |
| Adra2a   | 0,068751 | -0,00325 | 0     | 0,003 | 1 |
| 4930523C | 0,068751 | -0,00487 | 0     | 0,003 | 1 |
| Serping1 | 0,068751 | -0,00487 | 0     | 0,003 | 1 |
| Atp6v0d2 | 0,068751 | -0,00487 | 0     | 0,003 | 1 |
| Stra6l   | 0,068751 | -0,00487 | 0     | 0,003 | 1 |
| Ccdc180  | 0,068751 | -0,00487 | 0     | 0,003 | 1 |
| Hpcal4   | 0,068751 | -0,00487 | 0     | 0,003 | 1 |
| Kcnk3    | 0,068751 | -0,00487 | 0     | 0,003 | 1 |
| Alox5ap  | 0,068751 | -0,00487 | 0     | 0,003 | 1 |
| Fbxo16   | 0,068751 | -0,00487 | 0     | 0,003 | 1 |
| C2cd4b   | 0,068751 | -0,00487 | 0     | 0,003 | 1 |
| Tekt5    | 0,068751 | -0,00487 | 0     | 0,003 | 1 |
| Plcl2    | 0,068751 | -0,00487 | 0     | 0,003 | 1 |
| Adcyap1  | 0,068751 | -0,00487 | 0     | 0,003 | 1 |
| Rasa4    | 0,068751 | -0,00648 | 0     | 0,003 | 1 |
| Hoxa6    | 0,068751 | -0,00648 | 0     | 0,003 | 1 |
| Rassf10  | 0,068751 | -0,00971 | 0     | 0,003 | 1 |
| Trim30a  | 0,068751 | -0,01132 | 0     | 0,003 | 1 |
| Mrrf     | 0,06877  | -0,04035 | 0,172 | 0,207 | 1 |
| Sf3b6    | 0,068816 | -0,0391  | 0,745 | 0,784 | 1 |
| Gmip     | 0,068851 | 0,020346 | 0,037 | 0,021 | 1 |
| Slc8a1   | 0,068872 | 0,025504 | 0,142 | 0,111 | 1 |
| Amz2     | 0,069139 | -0,04107 | 0,348 | 0,393 | 1 |
| Fbxl15   | 0,069207 | -0,03634 | 0,115 | 0,145 | 1 |
| Mfsd6    | 0,069259 | -0,04954 | 0,741 | 0,777 | 1 |
| Far2os1  | 0,069293 | -0,0175  | 0,007 | 0,016 | 1 |
| Atg5     | 0,069323 | -0,03539 | 0,268 | 0,311 | 1 |
| Snx21    | 0,069342 | -0,0439  | 0,234 | 0,272 | 1 |
| Cpeb1    | 0,069448 | -0,04006 | 0,615 | 0,652 | 1 |
| Pde4d    | 0,069652 | 0,031402 | 0,17  | 0,135 | 1 |
| Xpo5     | 0,069682 | -0,02058 | 0,078 | 0,104 | 1 |
| Galnt3   | 0,069717 | -0,01088 | 0,007 | 0,016 | 1 |
| Ccdc85a  | 0,069717 | -0,01248 | 0,007 | 0,016 | 1 |
| Pttg1    | 0,06973  | -0,06426 | 0,316 | 0,356 | 1 |
| Rrp1     | 0,069754 | 0,060306 | 0,854 | 0,841 | 1 |
| Gm26699  | 0,06981  | -0,03842 | 0,194 | 0,229 | 1 |
| Riox1    | 0,069897 | 0,014232 | 0,093 | 0,067 | 1 |

|           |          |          |       |       |   |
|-----------|----------|----------|-------|-------|---|
| Cd14      | 0,069924 | 0,012333 | 0,012 | 0,003 | 1 |
| Tbl3      | 0,069966 | -0,03022 | 0,205 | 0,244 | 1 |
| Cenpp     | 0,06998  | -0,02272 | 0,043 | 0,063 | 1 |
| Abca5     | 0,069985 | 0,081715 | 0,398 | 0,363 | 1 |
| Dph5      | 0,070005 | -0,03042 | 0,243 | 0,283 | 1 |
| Gm16033   | 0,070028 | 0,010399 | 0,012 | 0,003 | 1 |
| Gm26694   | 0,070048 | -0,00928 | 0,007 | 0,016 | 1 |
| Vmn2r97   | 0,070133 | 0,010399 | 0,012 | 0,003 | 1 |
| 4930426LC | 0,070133 | 0,00943  | 0,012 | 0,003 | 1 |
| Olfr93    | 0,070133 | 0,00943  | 0,012 | 0,003 | 1 |
| Lpin1     | 0,070183 | 0,100213 | 0,452 | 0,418 | 1 |
| Gm26785   | 0,070193 | -0,00991 | 0,007 | 0,016 | 1 |
| Uqcrq     | 0,070229 | -0,04307 | 0,963 | 0,967 | 1 |
| Lrrd1     | 0,070237 | 0,008461 | 0,012 | 0,003 | 1 |
| A230083N  | 0,070334 | 0,010083 | 0,009 | 0,002 | 1 |
| Gm15582   | 0,070334 | 0,012988 | 0,009 | 0,002 | 1 |
| Zfp612    | 0,070374 | -0,04216 | 0,247 | 0,289 | 1 |
| Gabrd     | 0,070396 | 0,010083 | 0,009 | 0,002 | 1 |
| Eef1akmt1 | 0,070436 | -0,02784 | 0,141 | 0,176 | 1 |
| Bicc1     | 0,070455 | -0,06575 | 0,299 | 0,333 | 1 |
| Gm21994   | 0,070457 | 0,008141 | 0,009 | 0,002 | 1 |
| Slc28a3   | 0,070519 | 0,007169 | 0,009 | 0,002 | 1 |
| Olfr1423  | 0,070519 | 0,007169 | 0,009 | 0,002 | 1 |
| Manea     | 0,070637 | -0,03767 | 0,302 | 0,346 | 1 |
| Irgm1     | 0,070673 | -0,11003 | 0,107 | 0,135 | 1 |
| Xrra1     | 0,070765 | 0,007811 | 0,012 | 0,003 | 1 |
| Rps6kl1   | 0,070805 | -0,02851 | 0,114 | 0,145 | 1 |
| Casq1     | 0,070809 | -0,02726 | 0,111 | 0,141 | 1 |
| Galnt17   | 0,070816 | -0,02155 | 0,043 | 0,063 | 1 |
| Hoxc4     | 0,070824 | -0,01479 | 0,003 | 0,01  | 1 |
| Atn1      | 0,070851 | -0,04288 | 0,497 | 0,538 | 1 |
| Armc8     | 0,070889 | -0,03094 | 0,297 | 0,341 | 1 |
| Rnd2      | 0,070901 | 0,094756 | 0,588 | 0,559 | 1 |
| Atf4      | 0,070944 | 0,12841  | 0,745 | 0,751 | 1 |
| Wdr54     | 0,070964 | 0,030742 | 0,122 | 0,093 | 1 |
| Agk       | 0,07097  | -0,03758 | 0,215 | 0,252 | 1 |
| Etv3      | 0,07098  | -0,04032 | 0,19  | 0,226 | 1 |
| Htra2     | 0,071087 | -0,01579 | 0,167 | 0,207 | 1 |
| Srbd1     | 0,071101 | -0,04467 | 0,236 | 0,273 | 1 |
| Gm26782   | 0,071123 | -0,03086 | 0,193 | 0,233 | 1 |
| Srebf2    | 0,071157 | 0,084021 | 0,843 | 0,852 | 1 |
| Alkbh8    | 0,071249 | -0,03427 | 0,292 | 0,338 | 1 |
| Mvp       | 0,071379 | 0,06424  | 0,507 | 0,462 | 1 |
| Zfp296    | 0,071418 | -0,00838 | 0,003 | 0,01  | 1 |
| Bcl9      | 0,071456 | -0,05229 | 0,434 | 0,467 | 1 |
| Pcgf5     | 0,071469 | -0,02405 | 0,148 | 0,184 | 1 |
| Fam213b   | 0,071586 | 0,056415 | 0,374 | 0,332 | 1 |
| Tacr1     | 0,071617 | -0,00677 | 0,003 | 0,01  | 1 |
| Gm48249   | 0,071617 | -0,00677 | 0,003 | 0,01  | 1 |
| 4930524O  | 0,071617 | -0,00677 | 0,003 | 0,01  | 1 |
| Baiap2l2  | 0,071617 | -0,00677 | 0,003 | 0,01  | 1 |
| Ppara     | 0,071617 | -0,00677 | 0,003 | 0,01  | 1 |

|           |          |          |       |       |   |
|-----------|----------|----------|-------|-------|---|
| Gm26734   | 0,071617 | -0,00677 | 0,003 | 0,01  | 1 |
| 170001110 | 0,071617 | -0,00677 | 0,003 | 0,01  | 1 |
| Gm32913   | 0,071751 | -0,00901 | 0,003 | 0,01  | 1 |
| Sowahc    | 0,071758 | 0,04101  | 0,182 | 0,148 | 1 |
| Dusp12    | 0,071992 | 0,050854 | 0,237 | 0,202 | 1 |
| Pnkd      | 0,072014 | -0,04168 | 0,837 | 0,847 | 1 |
| Gjb6      | 0,072017 | -0,00481 | 0,003 | 0,01  | 1 |
| S1pr5     | 0,072178 | -0,0436  | 0,867 | 0,876 | 1 |
| Gdap1l1   | 0,07218  | 0,017824 | 0,039 | 0,023 | 1 |
| Strip1    | 0,072204 | 0,052033 | 0,246 | 0,211 | 1 |
| Gng10     | 0,072251 | 0,014487 | 0,028 | 0,015 | 1 |
| Nap1l4    | 0,072412 | 0,044088 | 0,853 | 0,834 | 1 |
| Xrcc5     | 0,072463 | -0,03527 | 0,191 | 0,229 | 1 |
| Capn15    | 0,072479 | 0,043774 | 0,302 | 0,26  | 1 |
| Rbm41     | 0,072567 | -0,02718 | 0,085 | 0,112 | 1 |
| Chrne     | 0,072646 | -0,0115  | 0,006 | 0,015 | 1 |
| B3galt1   | 0,072696 | -0,0409  | 0,194 | 0,231 | 1 |
| Zfp120    | 0,072848 | -0,03793 | 0,146 | 0,179 | 1 |
| Akap10    | 0,0729   | -0,04113 | 0,172 | 0,207 | 1 |
| Lysmd2    | 0,072916 | -0,02044 | 0,091 | 0,119 | 1 |
| Hdx       | 0,072979 | -0,03235 | 0,105 | 0,133 | 1 |
| Kctd1     | 0,073018 | -0,02016 | 0,027 | 0,044 | 1 |
| Ppp6r1    | 0,073023 | -0,02517 | 0,312 | 0,363 | 1 |
| Bcl7c     | 0,073073 | 0,058797 | 0,501 | 0,478 | 1 |
| Rpl11     | 0,073117 | 0,03804  | 0,992 | 0,995 | 1 |
| Ppt1      | 0,073123 | -0,03511 | 0,76  | 0,808 | 1 |
| Wdr26     | 0,073295 | -0,04957 | 0,645 | 0,67  | 1 |
| Fam174a   | 0,073309 | -0,03694 | 0,711 | 0,746 | 1 |
| Qk        | 0,073329 | -0,02594 | 0,999 | 1     | 1 |
| Klhl35    | 0,073368 | 0,026042 | 0,053 | 0,034 | 1 |
| Cacnb3    | 0,073398 | -0,01933 | 0,027 | 0,044 | 1 |
| Prim1     | 0,073412 | 0,049241 | 0,211 | 0,177 | 1 |
| Kifc1     | 0,073419 | -0,01283 | 0,005 | 0,013 | 1 |
| Tti1      | 0,073435 | -0,02192 | 0,115 | 0,146 | 1 |
| Kctd8     | 0,073537 | -0,017   | 0,004 | 0,011 | 1 |
| Arpc1b    | 0,073556 | 0,065076 | 0,65  | 0,628 | 1 |
| Jag1      | 0,073577 | -0,01327 | 0,014 | 0,026 | 1 |
| Pygo1     | 0,073589 | -0,00671 | 0,006 | 0,015 | 1 |
| Asb5      | 0,073701 | -0,01123 | 0,005 | 0,013 | 1 |
| Mapk8ip2  | 0,073712 | 0,025203 | 0,03  | 0,016 | 1 |
| Eya2      | 0,073722 | 0,028812 | 0,077 | 0,054 | 1 |
| Scd3      | 0,073764 | -0,05099 | 0,262 | 0,301 | 1 |
| 4933406P  | 0,073783 | -0,01061 | 0,004 | 0,011 | 1 |
| AC127341. | 0,073792 | 0,021496 | 0,045 | 0,028 | 1 |
| AU040972  | 0,07384  | -0,01742 | 0,027 | 0,044 | 1 |
| Mark3     | 0,073852 | -0,02847 | 0,622 | 0,67  | 1 |
| Arl5a     | 0,073907 | 0,053055 | 0,524 | 0,489 | 1 |
| Pld6      | 0,073915 | -0,02041 | 0,019 | 0,033 | 1 |
| Smn1      | 0,07395  | -0,03316 | 0,25  | 0,289 | 1 |
| Abcb4     | 0,073985 | -0,00963 | 0,005 | 0,013 | 1 |
| Tarbp2    | 0,074001 | -0,03544 | 0,18  | 0,215 | 1 |
| Zfp451    | 0,074014 | 0,04798  | 0,39  | 0,343 | 1 |

|           |          |          |       |       |   |
|-----------|----------|----------|-------|-------|---|
| Stk32c    | 0,074029 | -0,00901 | 0,004 | 0,011 | 1 |
| Rhbdl3    | 0,074029 | -0,00901 | 0,004 | 0,011 | 1 |
| Chsy3     | 0,074029 | -0,01061 | 0,004 | 0,011 | 1 |
| Ddx54     | 0,07408  | -0,03858 | 0,373 | 0,418 | 1 |
| Polr2c    | 0,074099 | -0,05312 | 0,577 | 0,605 | 1 |
| Ubash3b   | 0,074148 | -0,0157  | 0,339 | 0,385 | 1 |
| Gm13091   | 0,074269 | -0,00803 | 0,005 | 0,013 | 1 |
| Smpdl3a   | 0,074269 | -0,00803 | 0,005 | 0,013 | 1 |
| Mtus2     | 0,074271 | -0,00928 | 0,005 | 0,013 | 1 |
| Gm29609   | 0,074276 | -0,0074  | 0,004 | 0,011 | 1 |
| Fbxo24    | 0,074276 | -0,0074  | 0,004 | 0,011 | 1 |
| Plet1os   | 0,074276 | -0,0074  | 0,004 | 0,011 | 1 |
| Gm47112   | 0,074276 | -0,0074  | 0,004 | 0,011 | 1 |
| Eppk1     | 0,074276 | -0,0074  | 0,004 | 0,011 | 1 |
| AC133868. | 0,074276 | -0,0074  | 0,004 | 0,011 | 1 |
| Tuba4a    | 0,074294 | 0,041353 | 0,102 | 0,076 | 1 |
| Rfc5      | 0,074302 | -0,02489 | 0,07  | 0,094 | 1 |
| Mccc1     | 0,074319 | -0,03276 | 0,317 | 0,363 | 1 |
| Rbm12b2   | 0,074329 | 0,03465  | 0,132 | 0,102 | 1 |
| Fgfr1     | 0,074333 | -0,02456 | 0,152 | 0,187 | 1 |
| Ogfrl1    | 0,074383 | -0,03203 | 0,212 | 0,252 | 1 |
| Serinc4   | 0,074441 | -0,00866 | 0,005 | 0,013 | 1 |
| Cyp4x1    | 0,074441 | -0,00866 | 0,005 | 0,013 | 1 |
| Atr       | 0,074467 | -0,03119 | 0,256 | 0,298 | 1 |
| Stx8      | 0,074513 | -0,04485 | 0,423 | 0,467 | 1 |
| Ifitm3    | 0,074526 | -0,00705 | 0,004 | 0,011 | 1 |
| Ndufa9    | 0,074547 | -0,04771 | 0,543 | 0,59  | 1 |
| Sorcs3    | 0,07455  | -0,04014 | 0,105 | 0,133 | 1 |
| Ndufaf3   | 0,074605 | -0,03959 | 0,417 | 0,47  | 1 |
| Mfsd14a   | 0,074638 | -0,02707 | 0,801 | 0,844 | 1 |
| Calb1     | 0,074651 | -0,00866 | 0,004 | 0,011 | 1 |
| Gm10638   | 0,074664 | 0,011962 | 0,022 | 0,01  | 1 |
| Nox1      | 0,074727 | -0,00705 | 0,005 | 0,013 | 1 |
| Myl4      | 0,074727 | -0,00705 | 0,005 | 0,013 | 1 |
| Nmt1      | 0,074743 | -0,03766 | 0,731 | 0,758 | 1 |
| Lat       | 0,074775 | -0,01026 | 0,004 | 0,011 | 1 |
| Chst3     | 0,074822 | -0,02167 | 0,13  | 0,163 | 1 |
| Zhx2      | 0,074923 | -0,0392  | 0,171 | 0,205 | 1 |
| Ppih      | 0,075058 | -0,02532 | 0,16  | 0,195 | 1 |
| Atf2      | 0,075069 | -0,0316  | 0,504 | 0,558 | 1 |
| Slc24a3   | 0,075097 | -0,01977 | 0,111 | 0,141 | 1 |
| Tubgcp5   | 0,075128 | -0,03841 | 0,26  | 0,299 | 1 |
| Ctsb      | 0,075164 | 0,073028 | 0,995 | 0,997 | 1 |
| Caly      | 0,075173 | -0,01353 | 0,019 | 0,033 | 1 |
| Rasa2     | 0,075223 | 0,068021 | 0,244 | 0,21  | 1 |
| Map3k12   | 0,075246 | 0,054862 | 0,165 | 0,135 | 1 |
| Brd3      | 0,075352 | -0,03382 | 0,521 | 0,574 | 1 |
| Zyg11b    | 0,075374 | -0,03522 | 0,322 | 0,367 | 1 |
| Chid1     | 0,075429 | -0,03067 | 0,204 | 0,242 | 1 |
| Srpk3     | 0,075483 | -0,03113 | 0,272 | 0,319 | 1 |
| Akap6     | 0,075641 | -0,05084 | 0,447 | 0,486 | 1 |
| Pum2      | 0,075772 | -0,03214 | 0,773 | 0,8   | 1 |

|           |          |          |       |       |   |
|-----------|----------|----------|-------|-------|---|
| Sh3glb1   | 0,075844 | -0,03725 | 0,989 | 0,993 | 1 |
| Slc11a2   | 0,075928 | -0,02257 | 0,225 | 0,267 | 1 |
| Tollip    | 0,075947 | -0,04341 | 0,476 | 0,522 | 1 |
| Plec      | 0,075981 | 0,029235 | 0,057 | 0,037 | 1 |
| Paqr6     | 0,075991 | 0,088003 | 0,428 | 0,397 | 1 |
| Slc29a1   | 0,076337 | 0,024545 | 0,032 | 0,018 | 1 |
| Xaf1      | 0,076357 | -0,10179 | 0,613 | 0,644 | 1 |
| Pnpla6    | 0,076378 | -0,04591 | 0,289 | 0,327 | 1 |
| Utp3      | 0,076426 | -0,03387 | 0,321 | 0,364 | 1 |
| Platr25   | 0,076469 | -0,03102 | 0,126 | 0,158 | 1 |
| Ube2j2    | 0,076564 | 0,047146 | 0,447 | 0,4   | 1 |
| Apool     | 0,076566 | -0,02216 | 0,184 | 0,223 | 1 |
| Eif2ak1   | 0,07672  | -0,04888 | 0,334 | 0,369 | 1 |
| Dnpep     | 0,07677  | -0,02452 | 0,368 | 0,418 | 1 |
| Efhd2     | 0,076816 | -0,03203 | 0,154 | 0,189 | 1 |
| Col4a3bp  | 0,076838 | 0,05863  | 0,405 | 0,366 | 1 |
| Yipf1     | 0,076851 | -0,04661 | 0,461 | 0,504 | 1 |
| Sft2d2    | 0,076917 | -0,04444 | 0,36  | 0,403 | 1 |
| Uqcc2     | 0,076955 | -0,03075 | 0,823 | 0,883 | 1 |
| Ccz1      | 0,077056 | 0,062191 | 0,532 | 0,476 | 1 |
| Lin7c     | 0,077092 | -0,01491 | 0,427 | 0,488 | 1 |
| Cstf2     | 0,077126 | -0,02795 | 0,297 | 0,343 | 1 |
| Htatip2   | 0,077409 | 0,021067 | 0,053 | 0,034 | 1 |
| Pigv      | 0,077411 | -0,03881 | 0,149 | 0,18  | 1 |
| Cgn       | 0,077457 | 0,015486 | 0,017 | 0,007 | 1 |
| AC135964. | 0,077501 | 0,009413 | 0,017 | 0,007 | 1 |
| Asb1      | 0,077508 | -0,05329 | 0,243 | 0,278 | 1 |
| Cela1     | 0,077547 | 0,094427 | 0,459 | 0,428 | 1 |
| Zfp286    | 0,077636 | 0,018407 | 0,071 | 0,049 | 1 |
| Mapk10    | 0,07777  | -0,04837 | 0,175 | 0,208 | 1 |
| Nfs1      | 0,077791 | -0,0279  | 0,236 | 0,278 | 1 |
| Hypk      | 0,077914 | 0,059041 | 0,58  | 0,561 | 1 |
| Ndufc2    | 0,078022 | -0,04619 | 0,904 | 0,943 | 1 |
| Srp14     | 0,078023 | 0,053784 | 0,971 | 0,956 | 1 |
| Acbd6     | 0,078111 | 0,044423 | 0,558 | 0,517 | 1 |
| Pagr1a    | 0,078113 | 0,019664 | 0,069 | 0,047 | 1 |
| Asxl2     | 0,078115 | -0,04141 | 0,538 | 0,58  | 1 |
| Sphk2     | 0,078234 | -0,03453 | 0,305 | 0,346 | 1 |
| Adamtsl4  | 0,078325 | -0,05257 | 0,677 | 0,712 | 1 |
| Ccdc167   | 0,078343 | -0,02357 | 0,196 | 0,237 | 1 |
| Sh3rf1    | 0,078343 | -0,02081 | 0,073 | 0,098 | 1 |
| Zmym4     | 0,078385 | 0,053018 | 0,421 | 0,379 | 1 |
| Fktn      | 0,078386 | -0,05724 | 0,741 | 0,748 | 1 |
| 4930432K  | 0,078405 | 0,020123 | 0,032 | 0,018 | 1 |
| Snx27     | 0,078406 | -0,04077 | 0,656 | 0,698 | 1 |
| Osbpl9    | 0,078459 | -0,04308 | 0,181 | 0,216 | 1 |
| Csnk1g1   | 0,078485 | -0,01576 | 0,234 | 0,28  | 1 |
| Frs3      | 0,078497 | -0,02361 | 0,202 | 0,241 | 1 |
| Mgat4a    | 0,078502 | -0,0117  | 0,027 | 0,044 | 1 |
| Ddrgk1    | 0,078506 | 0,061668 | 0,938 | 0,946 | 1 |
| Zswim4    | 0,078541 | -0,01968 | 0,042 | 0,062 | 1 |
| Senp3     | 0,078588 | -0,03826 | 0,289 | 0,33  | 1 |

|           |          |          |       |       |   |
|-----------|----------|----------|-------|-------|---|
| Plekhg3   | 0,078592 | -0,04299 | 0,714 | 0,728 | 1 |
| Il18      | 0,078746 | -0,05382 | 0,586 | 0,603 | 1 |
| Zfp131    | 0,078749 | 0,039196 | 0,37  | 0,322 | 1 |
| Nudt9     | 0,078753 | 0,058166 | 0,535 | 0,501 | 1 |
| Tmem107   | 0,078755 | -0,01816 | 0,042 | 0,062 | 1 |
| Tln1      | 0,078801 | 0,058493 | 0,722 | 0,689 | 1 |
| Atcay     | 0,07897  | -0,02213 | 0,079 | 0,104 | 1 |
| Tigd2     | 0,078992 | -0,0419  | 0,263 | 0,306 | 1 |
| Clns1a    | 0,079081 | -0,04741 | 0,52  | 0,554 | 1 |
| Rab8b     | 0,079089 | -0,04816 | 0,278 | 0,314 | 1 |
| Cxcr2     | 0,079112 | 0,018651 | 0,024 | 0,011 | 1 |
| Slc5a5    | 0,079121 | -0,01067 | 0,031 | 0,049 | 1 |
| Pknox1    | 0,07913  | -0,01478 | 0,304 | 0,354 | 1 |
| Snap47    | 0,079234 | -0,04523 | 0,498 | 0,535 | 1 |
| Cbx4      | 0,079274 | 0,068752 | 0,675 | 0,642 | 1 |
| 241008010 | 0,079369 | -0,01369 | 0,023 | 0,037 | 1 |
| Peak1     | 0,079405 | -0,02295 | 0,278 | 0,322 | 1 |
| Trim41    | 0,079468 | -0,0345  | 0,246 | 0,286 | 1 |
| Rasal1    | 0,079488 | -0,04839 | 0,19  | 0,224 | 1 |
| Zfp566    | 0,079524 | 0,035679 | 0,096 | 0,072 | 1 |
| Dph6      | 0,079604 | -0,03938 | 0,156 | 0,19  | 1 |
| Tmem59    | 0,079751 | -0,02864 | 0,982 | 1     | 1 |
| Atmin     | 0,079799 | 0,038032 | 0,105 | 0,08  | 1 |
| Nars2     | 0,079894 | -0,02957 | 0,147 | 0,18  | 1 |
| Slc29a3   | 0,079895 | -0,02126 | 0,439 | 0,494 | 1 |
| Slc7a11   | 0,079933 | 0,014834 | 0,024 | 0,011 | 1 |
| Vti1b     | 0,079958 | -0,03608 | 0,61  | 0,655 | 1 |
| Ino80b    | 0,080043 | 0,049905 | 0,545 | 0,509 | 1 |
| Borcs5    | 0,080068 | -0,05528 | 0,349 | 0,385 | 1 |
| Thbs3     | 0,080156 | 0,033009 | 0,252 | 0,213 | 1 |
| Lrrc49    | 0,080162 | 0,05396  | 0,273 | 0,236 | 1 |
| Dnajc6    | 0,080162 | -0,04191 | 0,409 | 0,454 | 1 |
| Epha1     | 0,080191 | 0,013988 | 0,047 | 0,029 | 1 |
| Slc24a2   | 0,080261 | 0,05552  | 0,995 | 0,997 | 1 |
| Tab1      | 0,080296 | -0,03656 | 0,268 | 0,307 | 1 |
| AA467197  | 0,080332 | 0,015138 | 0,024 | 0,011 | 1 |
| Rgcc      | 0,080483 | 0,01292  | 0,024 | 0,011 | 1 |
| Ints3     | 0,080512 | -0,03959 | 0,362 | 0,408 | 1 |
| Wdfy2     | 0,080739 | -0,02887 | 0,37  | 0,42  | 1 |
| Hotairm1  | 0,08074  | -0,04941 | 0,4   | 0,442 | 1 |
| Eaf1      | 0,080874 | -0,01915 | 0,184 | 0,223 | 1 |
| Rpusd3    | 0,080936 | -0,01979 | 0,066 | 0,089 | 1 |
| Zbtb8os   | 0,080938 | -0,0382  | 0,402 | 0,447 | 1 |
| Klhl25    | 0,080946 | 0,028282 | 0,081 | 0,059 | 1 |
| Ipo9      | 0,081069 | -0,03396 | 0,293 | 0,335 | 1 |
| Arl15     | 0,081378 | -0,02051 | 0,034 | 0,052 | 1 |
| Dnajc30   | 0,081483 | -0,04209 | 0,346 | 0,387 | 1 |
| Ptgr2     | 0,081487 | -0,04298 | 0,422 | 0,465 | 1 |
| Phka2     | 0,081522 | -0,03363 | 0,154 | 0,187 | 1 |
| Wdr61     | 0,081735 | -0,03832 | 0,394 | 0,437 | 1 |
| Kdm4b     | 0,081883 | -0,04414 | 0,218 | 0,255 | 1 |
| Tmem159   | 0,081903 | 0,060359 | 0,47  | 0,45  | 1 |



|          |          |          |       |       |   |
|----------|----------|----------|-------|-------|---|
| Acads    | 0,082031 | -0,02312 | 0,145 | 0,179 | 1 |
| Ltn1     | 0,082044 | -0,03566 | 0,431 | 0,473 | 1 |
| Gm36975  | 0,082086 | 0,004895 | 0,005 | 0     | 1 |
| Kcnj9    | 0,082086 | 0,004895 | 0,005 | 0     | 1 |
| A530013C | 0,082086 | 0,004895 | 0,005 | 0     | 1 |
| Gm14820  | 0,082086 | 0,004895 | 0,005 | 0     | 1 |
| Tm4sf4   | 0,082086 | 0,004895 | 0,005 | 0     | 1 |
| Gm43064  | 0,082086 | 0,004895 | 0,005 | 0     | 1 |
| Ntn5     | 0,082086 | 0,004895 | 0,005 | 0     | 1 |
| Gm44686  | 0,082086 | 0,004895 | 0,005 | 0     | 1 |
| 1700120K | 0,082086 | 0,004895 | 0,005 | 0     | 1 |
| Gm16235  | 0,082086 | 0,004895 | 0,005 | 0     | 1 |
| Gm15350  | 0,082086 | 0,004895 | 0,005 | 0     | 1 |
| Gm31805  | 0,082086 | 0,004895 | 0,005 | 0     | 1 |
| Gm16573  | 0,082086 | 0,004895 | 0,005 | 0     | 1 |
| Il17d    | 0,082086 | 0,004895 | 0,005 | 0     | 1 |
| Gramd2   | 0,082086 | 0,004895 | 0,005 | 0     | 1 |
| Ttk      | 0,082086 | 0,004895 | 0,005 | 0     | 1 |
| Gm5922   | 0,082086 | 0,004895 | 0,005 | 0     | 1 |
| Rasl10a  | 0,082086 | 0,004895 | 0,005 | 0     | 1 |
| Rasl10b  | 0,082086 | 0,004895 | 0,005 | 0     | 1 |
| Ccl3     | 0,082086 | 0,004895 | 0,005 | 0     | 1 |
| Dok3     | 0,082086 | 0,004895 | 0,005 | 0     | 1 |
| Gm34923  | 0,082086 | 0,004895 | 0,005 | 0     | 1 |
| Gm47096  | 0,082086 | 0,004895 | 0,005 | 0     | 1 |
| Gm6566   | 0,082086 | 0,004895 | 0,005 | 0     | 1 |
| 1700001L | 0,082086 | 0,004895 | 0,005 | 0     | 1 |
| Gm20468  | 0,082086 | 0,004895 | 0,005 | 0     | 1 |
| Hba-a2   | 0,082086 | 0,059065 | 0,005 | 0     | 1 |
| Srrm4    | 0,082086 | 0,010737 | 0,005 | 0     | 1 |
| Slitrk2  | 0,082086 | 0,006846 | 0,005 | 0     | 1 |
| Fcgbp    | 0,082086 | 0,006846 | 0,005 | 0     | 1 |
| Lrtm1    | 0,082086 | 0,006846 | 0,005 | 0     | 1 |
| Gm26698  | 0,082086 | 0,006846 | 0,005 | 0     | 1 |
| Nexn     | 0,082086 | 0,005871 | 0,005 | 0     | 1 |
| 1110017D | 0,082086 | 0,005871 | 0,005 | 0     | 1 |
| Fam229a  | 0,082086 | 0,005871 | 0,005 | 0     | 1 |
| Utf1     | 0,082086 | 0,005871 | 0,005 | 0     | 1 |
| Gm15915  | 0,082086 | 0,005871 | 0,005 | 0     | 1 |
| Sftpc    | 0,082086 | 0,005871 | 0,005 | 0     | 1 |
| Olfm4    | 0,082086 | 0,005871 | 0,005 | 0     | 1 |
| Hmmr     | 0,082086 | 0,005871 | 0,005 | 0     | 1 |
| Gm12224  | 0,082086 | 0,005871 | 0,005 | 0     | 1 |
| Rph3al   | 0,082086 | 0,005871 | 0,005 | 0     | 1 |
| Gm17039  | 0,082086 | 0,005871 | 0,005 | 0     | 1 |
| 1810019N | 0,082086 | 0,006846 | 0,005 | 0     | 1 |
| Ggt6     | 0,082086 | 0,006846 | 0,005 | 0     | 1 |
| Tert     | 0,082086 | 0,006846 | 0,005 | 0     | 1 |
| Fam171a2 | 0,082086 | 0,008793 | 0,005 | 0     | 1 |
| Hist1h1d | 0,082086 | 0,008793 | 0,005 | 0     | 1 |
| Gm47316  | 0,082086 | 0,00782  | 0,005 | 0     | 1 |
| Slc35d1  | 0,082141 | 0,032539 | 0,098 | 0,073 | 1 |

|          |          |          |       |       |   |
|----------|----------|----------|-------|-------|---|
| Rmdn3    | 0,082241 | -0,03424 | 0,299 | 0,341 | 1 |
| Dusp16   | 0,082341 | -0,04646 | 0,433 | 0,472 | 1 |
| Gpr173   | 0,082377 | -0,01685 | 0,034 | 0,052 | 1 |
| Egln1    | 0,082407 | 0,080735 | 0,562 | 0,548 | 1 |
| Zfp595   | 0,08249  | -0,02283 | 0,101 | 0,13  | 1 |
| Rsl1     | 0,082602 | 0,017585 | 0,034 | 0,02  | 1 |
| Sdr42e1  | 0,08271  | 0,025313 | 0,079 | 0,057 | 1 |
| Impact   | 0,082721 | 0,071732 | 0,613 | 0,597 | 1 |
| Gm42695  | 0,082751 | -0,01516 | 0,026 | 0,042 | 1 |
| Cnot1    | 0,08284  | 0,0696   | 0,53  | 0,496 | 1 |
| Samd4b   | 0,082857 | -0,05381 | 0,642 | 0,673 | 1 |
| Atad1    | 0,082867 | -0,04601 | 0,678 | 0,719 | 1 |
| 3110045C | 0,083033 | 0,026328 | 0,038 | 0,023 | 1 |
| Gucy1b1  | 0,083039 | -0,02698 | 0,075 | 0,099 | 1 |
| Rabac1   | 0,083102 | 0,049068 | 0,987 | 0,995 | 1 |
| Ctsl     | 0,083103 | 0,066503 | 0,709 | 0,683 | 1 |
| Os9      | 0,083153 | 0,060979 | 0,747 | 0,745 | 1 |
| Dab2ip   | 0,083216 | 0,054358 | 0,403 | 0,369 | 1 |
| Acvr1b   | 0,083269 | 0,028971 | 0,094 | 0,07  | 1 |
| Gse1     | 0,083372 | 0,071905 | 0,445 | 0,416 | 1 |
| Tle3     | 0,083429 | 0,104615 | 0,49  | 0,459 | 1 |
| Gm4221   | 0,083457 | -0,03732 | 0,064 | 0,086 | 1 |
| Aff4     | 0,083501 | -0,03789 | 0,721 | 0,756 | 1 |
| Noct     | 0,083551 | -0,02467 | 0,048 | 0,068 | 1 |
| Mrpl33   | 0,083591 | -0,03462 | 0,699 | 0,727 | 1 |
| Map3k13  | 0,083732 | -0,02823 | 0,096 | 0,124 | 1 |
| Dph3     | 0,083863 | 0,062404 | 0,521 | 0,496 | 1 |
| Tdrkh    | 0,083878 | -0,02319 | 0,267 | 0,311 | 1 |
| Exoc6b   | 0,083882 | -0,0555  | 0,756 | 0,78  | 1 |
| Parm1    | 0,083949 | -0,024   | 0,358 | 0,418 | 1 |
| Pcdhb6   | 0,083958 | -0,01921 | 0,034 | 0,052 | 1 |
| Gm28322  | 0,08399  | 0,138063 | 0,154 | 0,125 | 1 |
| Naglu    | 0,084167 | -0,03349 | 0,18  | 0,213 | 1 |
| Tagap1   | 0,084207 | -0,02896 | 0,105 | 0,133 | 1 |
| Pcif1    | 0,0843   | -0,03782 | 0,534 | 0,571 | 1 |
| Zfp871   | 0,08431  | -0,03822 | 0,424 | 0,476 | 1 |
| Tmed3    | 0,08434  | -0,04485 | 0,59  | 0,626 | 1 |
| Npm3     | 0,084368 | -0,0399  | 0,241 | 0,281 | 1 |
| Gm16174  | 0,084408 | 0,017996 | 0,026 | 0,013 | 1 |
| Gm5547   | 0,084408 | 0,023689 | 0,026 | 0,013 | 1 |
| Nipa2    | 0,084473 | -0,03553 | 0,244 | 0,283 | 1 |
| Emc3     | 0,084478 | -0,03251 | 0,731 | 0,785 | 1 |
| Ppcdc    | 0,084548 | 0,027283 | 0,235 | 0,197 | 1 |
| Nmral1   | 0,084579 | 0,064934 | 0,893 | 0,868 | 1 |
| Rapgef4  | 0,08459  | -0,00968 | 0,018 | 0,031 | 1 |
| Gm17203  | 0,084707 | -0,00934 | 0,018 | 0,031 | 1 |
| Gars     | 0,084818 | -0,03199 | 0,46  | 0,506 | 1 |
| Nrarp    | 0,084875 | 0,017235 | 0,036 | 0,021 | 1 |
| Zfp275   | 0,084948 | -0,03922 | 0,234 | 0,27  | 1 |
| Prpf19   | 0,085005 | -0,04379 | 0,741 | 0,776 | 1 |
| Aldh1b1  | 0,085037 | 0,017044 | 0,026 | 0,013 | 1 |
| Sec24a   | 0,085051 | -0,0382  | 0,276 | 0,319 | 1 |

|           |          |          |       |       |   |
|-----------|----------|----------|-------|-------|---|
| AC116487. | 0,085073 | -0,01418 | 0,045 | 0,065 | 1 |
| Kctd18    | 0,085189 | -0,0419  | 0,274 | 0,311 | 1 |
| Cavin4    | 0,085312 | -0,0211  | 0,093 | 0,12  | 1 |
| Adam17    | 0,085485 | -0,03837 | 0,377 | 0,426 | 1 |
| Ddx10     | 0,085546 | -0,03617 | 0,225 | 0,262 | 1 |
| Gsk3b     | 0,085654 | 0,050376 | 0,91  | 0,881 | 1 |
| Gm3550    | 0,08567  | 0,014183 | 0,026 | 0,013 | 1 |
| Gm266     | 0,085732 | -0,01142 | 0,012 | 0,023 | 1 |
| Dbi       | 0,085839 | 0,026733 | 0,999 | 1     | 1 |
| Pcdhb18   | 0,085908 | -0,00132 | 0,097 | 0,127 | 1 |
| Arrdc3    | 0,085915 | -0,03233 | 0,94  | 0,943 | 1 |
| Eif2d     | 0,08601  | -0,02864 | 0,206 | 0,244 | 1 |
| Tcf7l1    | 0,086117 | 0,01901  | 0,019 | 0,008 | 1 |
| Zfp688    | 0,086238 | -0,02842 | 0,214 | 0,252 | 1 |
| Pkdcc     | 0,086354 | 0,013263 | 0,019 | 0,008 | 1 |
| Myo7a     | 0,086364 | 0,014571 | 0,014 | 0,005 | 1 |
| 17000010  | 0,086372 | -0,01045 | 0,012 | 0,023 | 1 |
| Ndp       | 0,086441 | -0,01799 | 0,144 | 0,179 | 1 |
| Shtn1     | 0,086456 | -0,0401  | 0,916 | 0,928 | 1 |
| Trp53cor1 | 0,086479 | -0,01335 | 0,022 | 0,036 | 1 |
| Ercc6     | 0,086682 | -0,03892 | 0,118 | 0,146 | 1 |
| Ankrd10   | 0,086726 | -0,04795 | 0,349 | 0,39  | 1 |
| 6330418K  | 0,08676  | -0,01803 | 0,037 | 0,055 | 1 |
| C78859    | 0,086787 | 0,025301 | 0,042 | 0,026 | 1 |
| BC049715  | 0,086835 | -0,00687 | 0,012 | 0,023 | 1 |
| Snrpc     | 0,086836 | -0,03354 | 0,64  | 0,668 | 1 |
| Ndufs1    | 0,086839 | -0,03447 | 0,596 | 0,654 | 1 |
| Mettl3    | 0,086885 | -0,04113 | 0,245 | 0,281 | 1 |
| Tmbim6    | 0,086899 | -0,03274 | 0,999 | 1     | 1 |
| Igdcc4    | 0,086933 | 0,016692 | 0,019 | 0,008 | 1 |
| Lamtor4   | 0,086992 | -0,03892 | 0,677 | 0,719 | 1 |
| B3glct    | 0,087034 | -0,01335 | 0,097 | 0,125 | 1 |
| Gm16861   | 0,087113 | -0,01404 | 0,022 | 0,036 | 1 |
| Gm14167   | 0,087211 | 0,009747 | 0,014 | 0,005 | 1 |
| Nub1      | 0,08723  | 0,03949  | 0,614 | 0,567 | 1 |
| Rnf14     | 0,087238 | -0,03851 | 0,567 | 0,595 | 1 |
| Shmt1     | 0,087272 | 0,026318 | 0,056 | 0,037 | 1 |
| Ndufa6    | 0,087324 | -0,03    | 0,855 | 0,893 | 1 |
| Cd109     | 0,08735  | 0,02021  | 0,036 | 0,021 | 1 |
| Hdgfl2    | 0,087411 | -0,03685 | 0,395 | 0,441 | 1 |
| Dctn1     | 0,087447 | 0,052868 | 0,823 | 0,818 | 1 |
| Trim46    | 0,087452 | 0,025673 | 0,066 | 0,046 | 1 |
| Pomc      | 0,087473 | -0,01803 | 0,033 | 0,05  | 1 |
| Mpp7      | 0,087474 | 0,02303  | 0,027 | 0,015 | 1 |
| Trip10    | 0,087612 | 0,011991 | 0,014 | 0,005 | 1 |
| Foxk2     | 0,087679 | -0,03567 | 0,292 | 0,33  | 1 |
| Pstk      | 0,087748 | -0,02811 | 0,258 | 0,299 | 1 |
| Adgra3    | 0,087897 | 0,018762 | 0,04  | 0,024 | 1 |
| Aatk      | 0,087983 | 0,044475 | 0,996 | 0,998 | 1 |
| Zfp653    | 0,088086 | 0,034632 | 0,159 | 0,128 | 1 |
| Elovl1    | 0,088091 | -0,03765 | 0,858 | 0,873 | 1 |
| Cd34      | 0,088095 | 0,025915 | 0,167 | 0,135 | 1 |

|          |          |          |       |       |   |
|----------|----------|----------|-------|-------|---|
| Aimp1    | 0,088098 | -0,03304 | 0,736 | 0,8   | 1 |
| Cdc42se2 | 0,088132 | -0,04126 | 0,769 | 0,789 | 1 |
| Zfp758   | 0,088137 | -0,02552 | 0,111 | 0,14  | 1 |
| Cnksr3   | 0,088189 | 0,026448 | 0,119 | 0,091 | 1 |
| Rnf13    | 0,088247 | -0,03609 | 0,998 | 1     | 1 |
| Polr2f   | 0,088436 | 0,037277 | 0,968 | 0,964 | 1 |
| Atp10b   | 0,088498 | -0,03241 | 0,236 | 0,275 | 1 |
| Fam19a2  | 0,08862  | 0,012886 | 0,019 | 0,008 | 1 |
| Gm48551  | 0,088726 | 0,012484 | 0,038 | 0,023 | 1 |
| Gpnmb    | 0,088782 | 0,020923 | 0,044 | 0,028 | 1 |
| Ogdh     | 0,08887  | -0,06317 | 0,658 | 0,668 | 1 |
| Nmi      | 0,088878 | -0,03822 | 0,12  | 0,148 | 1 |
| Rps21    | 0,088924 | 0,038433 | 0,999 | 1     | 1 |
| Gm34776  | 0,088951 | 0,021279 | 0,064 | 0,044 | 1 |
| Wdr82    | 0,089005 | -0,02505 | 0,277 | 0,32  | 1 |
| Tubd1    | 0,089021 | -0,02116 | 0,071 | 0,094 | 1 |
| Zfp143   | 0,089036 | 0,052588 | 0,137 | 0,111 | 1 |
| Ier5l    | 0,089137 | 0,048166 | 0,077 | 0,055 | 1 |
| Cav1     | 0,089158 | -0,04096 | 0,122 | 0,15  | 1 |
| Akirin2  | 0,089302 | -0,03663 | 0,669 | 0,719 | 1 |
| Trappc1  | 0,089344 | -0,02723 | 0,32  | 0,366 | 1 |
| Pdzd11   | 0,08936  | -0,03964 | 0,332 | 0,372 | 1 |
| Cebpb    | 0,089435 | 0,079813 | 0,192 | 0,163 | 1 |
| Styx     | 0,08945  | -0,05308 | 0,217 | 0,247 | 1 |
| Zcchc9   | 0,089545 | -0,05622 | 0,365 | 0,407 | 1 |
| Pacrg    | 0,089553 | -0,01566 | 0,033 | 0,05  | 1 |
| Esrra    | 0,089561 | -0,02711 | 0,119 | 0,148 | 1 |
| Parn     | 0,089599 | -0,03763 | 0,343 | 0,385 | 1 |
| Defb47   | 0,089775 | -0,01706 | 0,026 | 0,041 | 1 |
| Insig1   | 0,089859 | 0,116297 | 0,796 | 0,789 | 1 |
| Fam122b  | 0,08987  | -0,04147 | 0,166 | 0,197 | 1 |
| Sec24c   | 0,089889 | -0,02038 | 0,329 | 0,376 | 1 |
| Xrcc3    | 0,090018 | 0,045007 | 0,378 | 0,335 | 1 |
| Dmac2    | 0,090165 | -0,03807 | 0,173 | 0,205 | 1 |
| Ints8    | 0,090261 | -0,02839 | 0,171 | 0,205 | 1 |
| Ebp      | 0,090349 | 0,054318 | 0,619 | 0,593 | 1 |
| Tmem186  | 0,090491 | -0,02328 | 0,129 | 0,159 | 1 |
| Smox     | 0,090491 | -0,04398 | 0,364 | 0,41  | 1 |
| Ago4     | 0,090548 | -0,02024 | 0,074 | 0,098 | 1 |
| Gnai1    | 0,090554 | -0,05039 | 0,978 | 0,974 | 1 |
| Ralgps1  | 0,090698 | -0,07104 | 0,568 | 0,595 | 1 |
| Zfp760   | 0,090798 | -0,0356  | 0,18  | 0,213 | 1 |
| Ehbp1    | 0,090804 | -0,0332  | 0,18  | 0,215 | 1 |
| Efnb1    | 0,090834 | 0,024867 | 0,074 | 0,052 | 1 |
| Mfap3    | 0,090861 | -0,03574 | 0,205 | 0,241 | 1 |
| Ogfod2   | 0,090891 | -0,03025 | 0,207 | 0,242 | 1 |
| Map2k3   | 0,090913 | -0,02743 | 0,143 | 0,176 | 1 |
| Gng7     | 0,090928 | -0,03751 | 0,649 | 0,696 | 1 |
| Qrs1     | 0,091018 | -0,02601 | 0,07  | 0,093 | 1 |
| Ube2g1   | 0,091061 | -0,0386  | 0,629 | 0,685 | 1 |
| 3110021N | 0,091161 | -0,05287 | 0,338 | 0,377 | 1 |
| Bcas2    | 0,09123  | -0,04351 | 0,749 | 0,785 | 1 |

|          |          |          |       |       |   |
|----------|----------|----------|-------|-------|---|
| Lrif1    | 0,091248 | 0,086024 | 0,41  | 0,39  | 1 |
| Arhgdig  | 0,091271 | -0,01495 | 0,011 | 0,021 | 1 |
| Zkscan2  | 0,091532 | -0,01317 | 0,033 | 0,05  | 1 |
| Akt3     | 0,091557 | -0,03004 | 0,143 | 0,174 | 1 |
| D830024N | 0,09164  | 0,019857 | 0,056 | 0,037 | 1 |
| Trp53i13 | 0,091677 | 0,049333 | 0,402 | 0,366 | 1 |
| Gm26737  | 0,091711 | -0,01874 | 0,017 | 0,029 | 1 |
| Greb1    | 0,091819 | -0,01336 | 0,011 | 0,021 | 1 |
| Tmem50a  | 0,091844 | -0,0369  | 0,955 | 0,959 | 1 |
| Sept11   | 0,091855 | 0,046248 | 0,091 | 0,068 | 1 |
| Lmo4     | 0,092002 | -0,02088 | 0,372 | 0,423 | 1 |
| Acrbp    | 0,092054 | -0,02237 | 0,108 | 0,137 | 1 |
| Ddx19b   | 0,092078 | 0,020182 | 0,096 | 0,072 | 1 |
| Ntmt1    | 0,09217  | -0,03495 | 0,29  | 0,33  | 1 |
| Wdr77    | 0,092461 | -0,02863 | 0,277 | 0,319 | 1 |
| Rit1     | 0,092473 | -0,03163 | 0,248 | 0,286 | 1 |
| Pnkp     | 0,092478 | -0,03239 | 0,304 | 0,343 | 1 |
| Zbed3    | 0,092547 | -0,01733 | 0,04  | 0,059 | 1 |
| Mkxn3    | 0,092593 | -0,02158 | 0,082 | 0,107 | 1 |
| BC003965 | 0,092594 | -0,04157 | 0,434 | 0,472 | 1 |
| Rpa2     | 0,092623 | 0,037427 | 0,307 | 0,267 | 1 |
| Wdr83os  | 0,092682 | -0,04015 | 0,553 | 0,597 | 1 |
| A830019P | 0,092712 | -0,01075 | 0,026 | 0,041 | 1 |
| Pcdhgb5  | 0,092724 | -0,01408 | 0,044 | 0,063 | 1 |
| Zfp119a  | 0,092739 | -0,0158  | 0,04  | 0,059 | 1 |
| Apip     | 0,092766 | -0,03667 | 0,283 | 0,322 | 1 |
| Ccdc134  | 0,092817 | -0,02068 | 0,156 | 0,189 | 1 |
| Tmem80   | 0,092823 | -0,04717 | 0,54  | 0,585 | 1 |
| Sumf1    | 0,092917 | -0,02139 | 0,161 | 0,195 | 1 |
| S100a6   | 0,092951 | 0,002778 | 0,512 | 0,566 | 1 |
| Bckdha   | 0,093006 | 0,060422 | 0,553 | 0,517 | 1 |
| Med25    | 0,093023 | 0,063066 | 0,384 | 0,353 | 1 |
| Mob3a    | 0,093034 | -0,03203 | 0,258 | 0,298 | 1 |
| Il33     | 0,093181 | 0,054301 | 0,885 | 0,821 | 1 |
| Nrip1    | 0,093353 | -0,04964 | 0,399 | 0,447 | 1 |
| Rnf112   | 0,093357 | -0,04579 | 0,353 | 0,39  | 1 |
| Gna13    | 0,093481 | -0,02272 | 0,399 | 0,449 | 1 |
| Zfp251   | 0,093528 | -0,0401  | 0,179 | 0,211 | 1 |
| Prps2    | 0,093535 | -0,0295  | 0,363 | 0,407 | 1 |
| Naf1     | 0,093548 | -0,03741 | 0,32  | 0,361 | 1 |
| Nup98    | 0,093614 | 0,072712 | 0,432 | 0,397 | 1 |
| Nup214   | 0,093772 | -0,03803 | 0,344 | 0,38  | 1 |
| Anapc11  | 0,093801 | -0,0239  | 0,909 | 0,94  | 1 |
| Rabgap1l | 0,093805 | 0,04436  | 0,545 | 0,502 | 1 |
| Myh14    | 0,093815 | -0,05075 | 0,508 | 0,556 | 1 |
| Naprt    | 0,093855 | 0,019506 | 0,054 | 0,036 | 1 |
| Megf6    | 0,093892 | 0,019307 | 0,021 | 0,01  | 1 |
| Gmppa    | 0,093896 | -0,02503 | 0,222 | 0,262 | 1 |
| Mier1    | 0,093917 | -0,04495 | 0,665 | 0,693 | 1 |
| Prpf38b  | 0,09395  | -0,05435 | 0,649 | 0,665 | 1 |
| Snhg10   | 0,094018 | -0,02165 | 0,05  | 0,07  | 1 |
| Tyro3    | 0,094123 | 0,076671 | 0,892 | 0,891 | 1 |

|           |          |          |       |       |   |
|-----------|----------|----------|-------|-------|---|
| Rpl10a    | 0,094231 | 0,057438 | 0,913 | 0,883 | 1 |
| Cluh      | 0,094293 | -0,02613 | 0,173 | 0,207 | 1 |
| Pcdhgc4   | 0,094382 | -0,01853 | 0,064 | 0,086 | 1 |
| Deaf1     | 0,09439  | -0,03137 | 0,287 | 0,327 | 1 |
| Gpn3      | 0,094564 | -0,04166 | 0,301 | 0,338 | 1 |
| Tcf4      | 0,094632 | 0,045195 | 0,995 | 0,998 | 1 |
| Zbtb7a    | 0,094642 | -0,06524 | 0,821 | 0,836 | 1 |
| Tm7sf2    | 0,09475  | 0,025851 | 0,099 | 0,075 | 1 |
| Cpm       | 0,094759 | -0,043   | 0,719 | 0,766 | 1 |
| Dedd2     | 0,094897 | 0,059764 | 0,194 | 0,164 | 1 |
| Gnl1      | 0,09499  | -0,02218 | 0,238 | 0,278 | 1 |
| Otulin    | 0,095018 | -0,04768 | 0,314 | 0,348 | 1 |
| Akt1s1    | 0,095164 | -0,03187 | 0,519 | 0,569 | 1 |
| Naxd      | 0,095248 | -0,02789 | 0,68  | 0,73  | 1 |
| Ckap5     | 0,095434 | -0,03058 | 0,799 | 0,815 | 1 |
| Stard13   | 0,095508 | -0,02065 | 0,244 | 0,286 | 1 |
| Erlin1    | 0,095538 | -0,01922 | 0,06  | 0,081 | 1 |
| Wdr11     | 0,095619 | -0,04238 | 0,232 | 0,268 | 1 |
| Ctp       | 0,095708 | -0,02923 | 0,122 | 0,151 | 1 |
| Ublcp1    | 0,095715 | -0,02686 | 0,422 | 0,472 | 1 |
| Tmod1     | 0,095724 | 0,09119  | 0,915 | 0,912 | 1 |
| Gm10382   | 0,095731 | 0,01292  | 0,021 | 0,01  | 1 |
| Pclaf     | 0,095732 | -0,00995 | 0,021 | 0,034 | 1 |
| Mrpl58    | 0,095765 | -0,04987 | 0,615 | 0,647 | 1 |
| BC034090  | 0,095776 | 0,056036 | 0,189 | 0,161 | 1 |
| Bcas1os2  | 0,09578  | 0,011962 | 0,021 | 0,01  | 1 |
| Gm15853   | 0,09581  | -0,02083 | 0,06  | 0,081 | 1 |
| Wbp11     | 0,095827 | -0,02572 | 0,662 | 0,719 | 1 |
| Rasl11a   | 0,095837 | 0,013299 | 0,011 | 0,003 | 1 |
| Zfp954    | 0,095892 | 0,033074 | 0,133 | 0,106 | 1 |
| Rgs14     | 0,095977 | 0,013299 | 0,011 | 0,003 | 1 |
| Armc6     | 0,096031 | -0,01567 | 0,144 | 0,177 | 1 |
| Tet1      | 0,096034 | -0,04857 | 0,342 | 0,377 | 1 |
| Ech1      | 0,096041 | -0,03229 | 0,81  | 0,826 | 1 |
| Wdr92     | 0,096117 | -0,02919 | 0,117 | 0,145 | 1 |
| Gm26786   | 0,096117 | 0,010399 | 0,011 | 0,003 | 1 |
| Zmym1     | 0,096268 | -0,03916 | 0,208 | 0,242 | 1 |
| Snhg20    | 0,096322 | -0,03093 | 0,412 | 0,459 | 1 |
| Chaf1b    | 0,096397 | 0,010399 | 0,011 | 0,003 | 1 |
| A330084C: | 0,096397 | 0,00943  | 0,011 | 0,003 | 1 |
| Pick1.1   | 0,096397 | 0,008461 | 0,011 | 0,003 | 1 |
| Tmem126b  | 0,096459 | -0,03099 | 0,235 | 0,273 | 1 |
| Mvb12b    | 0,096523 | -0,05079 | 0,677 | 0,691 | 1 |
| Rps3a1    | 0,096571 | 0,038083 | 0,997 | 1     | 1 |
| Polr2k    | 0,096579 | -0,04484 | 0,528 | 0,567 | 1 |
| Cuta      | 0,096775 | -0,03392 | 0,826 | 0,85  | 1 |
| Sap30bp   | 0,09703  | -0,04858 | 0,432 | 0,467 | 1 |
| Car14     | 0,097227 | -0,02728 | 0,91  | 0,924 | 1 |
| Itgb3bp   | 0,097253 | -0,03406 | 0,25  | 0,288 | 1 |
| Lta4h     | 0,097279 | -0,01829 | 0,441 | 0,493 | 1 |
| Gm36445   | 0,097349 | -0,00976 | 0,016 | 0,028 | 1 |
| Dock3     | 0,097376 | -0,02197 | 0,337 | 0,384 | 1 |

|          |          |          |       |       |   |
|----------|----------|----------|-------|-------|---|
| Noxo1    | 0,097428 | 0,016342 | 0,031 | 0,018 | 1 |
| Lmnb2    | 0,097494 | -0,02565 | 0,126 | 0,154 | 1 |
| Elfn2    | 0,097494 | -0,01257 | 0,016 | 0,028 | 1 |
| Fgd1     | 0,097503 | -0,01395 | 0,028 | 0,044 | 1 |
| Mnat1    | 0,097554 | -0,05117 | 0,302 | 0,337 | 1 |
| Mrps7    | 0,09768  | -0,0453  | 0,584 | 0,62  | 1 |
| Borcs7   | 0,097757 | -0,04977 | 0,368 | 0,407 | 1 |
| Zfp568   | 0,097822 | -0,02102 | 0,079 | 0,102 | 1 |
| Emc8     | 0,09789  | -0,04372 | 0,634 | 0,675 | 1 |
| Epha4    | 0,097909 | -0,0419  | 0,243 | 0,283 | 1 |
| Trim23   | 0,09794  | -0,04344 | 0,314 | 0,35  | 1 |
| Fgd4     | 0,098274 | 0,060949 | 0,218 | 0,187 | 1 |
| Ube2v2   | 0,098294 | -0,03168 | 0,532 | 0,589 | 1 |
| Mafg     | 0,098589 | -0,01256 | 0,585 | 0,66  | 1 |
| Slc41a1  | 0,098702 | 0,040109 | 0,166 | 0,137 | 1 |
| Mfap3l   | 0,098767 | 0,039291 | 0,094 | 0,072 | 1 |
| Vps4a    | 0,098837 | -0,0389  | 0,587 | 0,623 | 1 |
| Mettl13  | 0,098898 | -0,02339 | 0,148 | 0,18  | 1 |
| Fance    | 0,098914 | 0,031326 | 0,285 | 0,246 | 1 |
| Ttc12    | 0,09894  | -0,03547 | 0,114 | 0,141 | 1 |
| Chmp6    | 0,098944 | -0,02442 | 0,158 | 0,19  | 1 |
| D330050G | 0,098949 | -0,01115 | 0,01  | 0,02  | 1 |
| Synj2    | 0,09895  | -0,03202 | 0,493 | 0,537 | 1 |
| Pcsk2os1 | 0,098957 | -0,00988 | 0,025 | 0,039 | 1 |
| Nit2     | 0,099006 | 0,040672 | 0,14  | 0,114 | 1 |
| Rapgef6  | 0,099027 | -0,0149  | 0,394 | 0,444 | 1 |
| Scamp1   | 0,099033 | -0,04215 | 0,396 | 0,436 | 1 |
| Poll     | 0,099076 | -0,01634 | 0,095 | 0,122 | 1 |
| Tmem135  | 0,099301 | -0,03059 | 0,334 | 0,379 | 1 |
| Raly1    | 0,09931  | -0,02085 | 0,046 | 0,065 | 1 |
| Helq     | 0,09935  | -0,03442 | 0,095 | 0,12  | 1 |
| S100a8   | 0,099375 | 0,010083 | 0,008 | 0,002 | 1 |
| Tfap2a   | 0,099375 | 0,011052 | 0,008 | 0,002 | 1 |
| Ppp2r5e  | 0,099376 | -0,04106 | 0,365 | 0,408 | 1 |
| Tex261   | 0,099503 | -0,04205 | 0,626 | 0,67  | 1 |
| E2f1     | 0,099548 | 0,008141 | 0,008 | 0,002 | 1 |
| Kcnk7    | 0,099548 | 0,008141 | 0,008 | 0,002 | 1 |
| Nsl1     | 0,099548 | 0,011052 | 0,008 | 0,002 | 1 |
| Gm5608   | 0,099548 | 0,009112 | 0,008 | 0,002 | 1 |
| Ube2t    | 0,099617 | -0,01018 | 0,01  | 0,02  | 1 |
| Gm7628   | 0,099617 | -0,01018 | 0,01  | 0,02  | 1 |
| Hfe      | 0,099617 | -0,01018 | 0,01  | 0,02  | 1 |
| Echdc3   | 0,099634 | 0,007169 | 0,008 | 0,002 | 1 |
| Gchfr    | 0,099634 | 0,007169 | 0,008 | 0,002 | 1 |
| Gm28874  | 0,099634 | 0,007169 | 0,008 | 0,002 | 1 |
| Gm44949  | 0,099634 | 0,007169 | 0,008 | 0,002 | 1 |
| Gm28285  | 0,099634 | 0,007169 | 0,008 | 0,002 | 1 |
| Eno1b    | 0,099634 | 0,007169 | 0,008 | 0,002 | 1 |
| Wdr76    | 0,099635 | -0,02373 | 0,118 | 0,146 | 1 |
| Tspan17  | 0,09968  | 0,071214 | 0,518 | 0,493 | 1 |
| Gm26833  | 0,099721 | 0,006195 | 0,008 | 0,002 | 1 |
| Gm45351  | 0,099721 | 0,006195 | 0,008 | 0,002 | 1 |

|           |          |          |       |       |   |
|-----------|----------|----------|-------|-------|---|
| Gm9837    | 0,099721 | 0,006195 | 0,008 | 0,002 | 1 |
| Dnmt3aos  | 0,099721 | 0,006195 | 0,008 | 0,002 | 1 |
| Kctd16    | 0,099721 | 0,006195 | 0,008 | 0,002 | 1 |
| Prpf39    | 0,099726 | 0,050652 | 0,588 | 0,545 | 1 |
| Tada2b    | 0,099732 | -0,03368 | 0,198 | 0,234 | 1 |
| Fbxl17    | 0,099758 | -0,03605 | 0,214 | 0,247 | 1 |
| Pcmt1     | 0,099875 | -0,04324 | 0,725 | 0,766 | 1 |
| Qsox1     | 0,099881 | 0,079395 | 0,449 | 0,431 | 1 |
| AC034116. | 0,099983 | 0,00943  | 0,008 | 0,002 | 1 |
| Fads1     | 0,100059 | -0,02815 | 0,229 | 0,268 | 1 |
| Zfp516    | 0,100064 | -0,01248 | 0,028 | 0,044 | 1 |
| Gm26916   | 0,100079 | 0,027185 | 0,023 | 0,011 | 1 |
| Gldn      | 0,100157 | 0,010713 | 0,008 | 0,002 | 1 |
| Tnks1bp1  | 0,100176 | 0,014269 | 0,084 | 0,062 | 1 |
| Gm46430   | 0,100239 | -0,02186 | 0,097 | 0,124 | 1 |
| Ctbs      | 0,100245 | -0,02924 | 0,145 | 0,176 | 1 |
| D2hgdh    | 0,100258 | -0,01816 | 0,121 | 0,15  | 1 |
| Ino80e    | 0,100365 | -0,03205 | 0,318 | 0,364 | 1 |
| Kpna3     | 0,100367 | -0,03918 | 0,452 | 0,489 | 1 |
| Gm26735   | 0,100374 | 0,013916 | 0,016 | 0,007 | 1 |
| Gm13610   | 0,100418 | 0,004573 | 0,008 | 0,002 | 1 |
| Gclm      | 0,100436 | -0,04072 | 0,828 | 0,841 | 1 |
| Zcwpw1    | 0,100496 | -0,03583 | 0,267 | 0,304 | 1 |
| Cacnb4    | 0,100583 | -0,04581 | 0,658 | 0,709 | 1 |
| Mtif2     | 0,10068  | -0,01848 | 0,208 | 0,247 | 1 |
| Anp32e    | 0,100819 | 0,051515 | 0,659 | 0,634 | 1 |
| Ankrd16   | 0,100888 | -0,0208  | 0,145 | 0,177 | 1 |
| Fut10     | 0,10093  | -0,03953 | 0,171 | 0,202 | 1 |
| Hook1     | 0,100964 | -0,00824 | 0,01  | 0,02  | 1 |
| Adra1b    | 0,101067 | -0,02383 | 0,093 | 0,119 | 1 |
| 4932438H: | 0,101079 | 0,013916 | 0,016 | 0,007 | 1 |
| Slc25a36  | 0,101126 | -0,04374 | 0,464 | 0,507 | 1 |
| Asb6      | 0,101176 | 0,039133 | 0,227 | 0,192 | 1 |
| Dgka      | 0,101211 | -0,02181 | 0,031 | 0,047 | 1 |
| Klhdc1    | 0,101256 | -0,02487 | 0,144 | 0,176 | 1 |
| Rnf6      | 0,101334 | 0,040859 | 0,348 | 0,311 | 1 |
| Zfp2      | 0,101381 | -0,02364 | 0,207 | 0,246 | 1 |
| Kbtbd7    | 0,10139  | -0,02589 | 0,169 | 0,202 | 1 |
| Zmpste24  | 0,1014   | -0,01967 | 0,423 | 0,475 | 1 |
| C1qc      | 0,101426 | 0,015789 | 0,023 | 0,011 | 1 |
| Asxl1     | 0,101641 | -0,02898 | 0,241 | 0,281 | 1 |
| Lrrc29    | 0,101674 | 0,011651 | 0,016 | 0,007 | 1 |
| Mrm2      | 0,10171  | -0,02339 | 0,152 | 0,184 | 1 |
| Trim36    | 0,101721 | -0,04907 | 0,454 | 0,502 | 1 |
| Nrbf2     | 0,101961 | -0,02894 | 0,33  | 0,374 | 1 |
| Rbm27     | 0,101978 | 0,050472 | 0,454 | 0,416 | 1 |
| Slc12a6   | 0,10203  | -0,02041 | 0,352 | 0,4   | 1 |
| H13       | 0,102042 | -0,03715 | 0,433 | 0,476 | 1 |
| Ankrd13b  | 0,102051 | 0,056816 | 0,345 | 0,311 | 1 |
| Abcf2     | 0,102079 | -0,03779 | 0,263 | 0,298 | 1 |
| Arntl     | 0,102161 | -0,02146 | 0,084 | 0,109 | 1 |
| Mfsd14b   | 0,102214 | -0,0423  | 0,546 | 0,572 | 1 |



|          |          |          |       |       |   |
|----------|----------|----------|-------|-------|---|
| Pcdhb21  | 0,102221 | -0,01374 | 0,039 | 0,057 | 1 |
| Syngn3   | 0,102262 | 0,016938 | 0,035 | 0,021 | 1 |
| Snrnp40  | 0,102334 | -0,03206 | 0,337 | 0,376 | 1 |
| Wsb2     | 0,102425 | -0,0412  | 0,643 | 0,672 | 1 |
| Ptbp1    | 0,102483 | 0,048653 | 0,26  | 0,228 | 1 |
| Rbsn     | 0,102496 | -0,03182 | 0,353 | 0,39  | 1 |
| Sh3gl1   | 0,1025   | -0,03495 | 0,354 | 0,395 | 1 |
| Vcan     | 0,102504 | 0,007482 | 0,016 | 0,007 | 1 |
| Mrpl43   | 0,102509 | -0,03803 | 0,65  | 0,675 | 1 |
| Tbck     | 0,102547 | -0,03806 | 0,368 | 0,403 | 1 |
| Flywch1  | 0,102588 | -0,05961 | 0,595 | 0,607 | 1 |
| Pcdhga7  | 0,102695 | -0,02517 | 0,078 | 0,101 | 1 |
| Ube2d2a  | 0,102712 | 0,050814 | 0,929 | 0,925 | 1 |
| Lzts3    | 0,102718 | -0,02101 | 0,145 | 0,177 | 1 |
| Akap17b  | 0,102746 | -0,0199  | 0,076 | 0,099 | 1 |
| Gramd1b  | 0,102793 | -0,057   | 0,457 | 0,494 | 1 |
| Nmd3     | 0,102821 | 0,039145 | 0,197 | 0,166 | 1 |
| Pex13    | 0,102898 | -0,0259  | 0,42  | 0,475 | 1 |
| Wdr34    | 0,102907 | 0,023372 | 0,137 | 0,109 | 1 |
| Cstf1    | 0,102978 | -0,01496 | 0,125 | 0,153 | 1 |
| Zc3h12b  | 0,103012 | -0,01674 | 0,042 | 0,06  | 1 |
| Cse1l    | 0,103164 | -0,02466 | 0,271 | 0,311 | 1 |
| Cdcpf1   | 0,103169 | -0,02799 | 0,182 | 0,215 | 1 |
| Cox14    | 0,103301 | -0,03728 | 0,682 | 0,727 | 1 |
| Nfix     | 0,103308 | 0,039616 | 0,997 | 1     | 1 |
| Fads6    | 0,103579 | -0,03744 | 0,664 | 0,702 | 1 |
| Utp23    | 0,103585 | -0,03284 | 0,175 | 0,207 | 1 |
| Gm10701  | 0,103608 | 0,026885 | 0,039 | 0,024 | 1 |
| Scap     | 0,103613 | -0,03669 | 0,461 | 0,512 | 1 |
| Usp28    | 0,103693 | -0,01822 | 0,088 | 0,114 | 1 |
| Il17rb   | 0,103739 | -0,02945 | 0,095 | 0,12  | 1 |
| Slc25a48 | 0,103795 | -0,01388 | 0,015 | 0,026 | 1 |
| Kif2a    | 0,10382  | 0,052348 | 0,491 | 0,452 | 1 |
| Arhgap1  | 0,103876 | -0,03086 | 0,206 | 0,241 | 1 |
| Gadd45b  | 0,103943 | 0,179231 | 0,351 | 0,324 | 1 |
| Gm47469  | 0,104126 | -0,02051 | 0,038 | 0,055 | 1 |
| Gm32296  | 0,104138 | -0,01126 | 0,02  | 0,033 | 1 |
| Hsd17b10 | 0,104146 | -0,03822 | 0,595 | 0,636 | 1 |
| Zfp110   | 0,104171 | -0,02527 | 0,288 | 0,328 | 1 |
| Chmp2a   | 0,104198 | 0,046712 | 0,96  | 0,961 | 1 |
| Pigx     | 0,104291 | -0,02222 | 0,165 | 0,198 | 1 |
| Gm15893  | 0,104328 | 0,011932 | 0,023 | 0,011 | 1 |
| Hist1h3d | 0,104379 | -0,01327 | 0,015 | 0,026 | 1 |
| Jun      | 0,104391 | 0,319034 | 0,885 | 0,891 | 1 |
| Alkbh3   | 0,104418 | -0,03221 | 0,128 | 0,156 | 1 |
| Ube2h    | 0,104513 | -0,04219 | 0,705 | 0,748 | 1 |
| Eif4b    | 0,104577 | 0,058919 | 0,72  | 0,715 | 1 |
| Slc26a11 | 0,104605 | -0,02501 | 0,168 | 0,2   | 1 |
| Sox8     | 0,104728 | 0,050319 | 0,883 | 0,872 | 1 |
| Asap2    | 0,104806 | 0,048279 | 0,416 | 0,376 | 1 |
| Eogt     | 0,105    | -0,00872 | 0,02  | 0,033 | 1 |
| Gas2l1   | 0,105189 | -0,03877 | 0,223 | 0,259 | 1 |

|            |          |          |       |       |   |
|------------|----------|----------|-------|-------|---|
| Camta1     | 0,105221 | -0,04604 | 0,605 | 0,642 | 1 |
| Mycn       | 0,105301 | 0,019408 | 0,039 | 0,024 | 1 |
| Abcc4      | 0,105315 | -0,01461 | 0,035 | 0,052 | 1 |
| C2cd2l     | 0,105321 | -0,02569 | 0,203 | 0,239 | 1 |
| Pygb       | 0,1054   | -0,0475  | 0,213 | 0,246 | 1 |
| Gpr137c    | 0,105452 | -0,04013 | 0,322 | 0,363 | 1 |
| Nckap1     | 0,105479 | -0,05408 | 0,817 | 0,828 | 1 |
| Mrpl47     | 0,105527 | -0,02747 | 0,138 | 0,167 | 1 |
| Pold4      | 0,105551 | -0,03451 | 0,27  | 0,311 | 1 |
| Olf718-ps1 | 0,105607 | 0,019699 | 0,039 | 0,024 | 1 |
| Clip3      | 0,105632 | 0,049793 | 0,952 | 0,964 | 1 |
| Ino80      | 0,105651 | 0,053002 | 0,348 | 0,315 | 1 |
| Slc16a1    | 0,105657 | -0,05025 | 0,736 | 0,782 | 1 |
| 1700025G   | 0,105683 | -0,04519 | 0,473 | 0,511 | 1 |
| Stim2      | 0,105759 | -0,0261  | 0,212 | 0,249 | 1 |
| Mef2c      | 0,105796 | -0,01779 | 0,027 | 0,042 | 1 |
| L1cam      | 0,105843 | 0,032473 | 0,043 | 0,028 | 1 |
| Srd5a3     | 0,105934 | -0,04043 | 0,328 | 0,364 | 1 |
| Bad        | 0,105974 | -0,02638 | 0,237 | 0,275 | 1 |
| Hmox2      | 0,106167 | -0,03808 | 0,845 | 0,885 | 1 |
| Tiparp     | 0,106188 | 0,110264 | 0,244 | 0,216 | 1 |
| Amotl1     | 0,106264 | 0,039102 | 0,059 | 0,041 | 1 |
| Gulp1      | 0,106486 | 0,042481 | 0,068 | 0,049 | 1 |
| Ube2e3     | 0,106528 | -0,02129 | 0,771 | 0,816 | 1 |
| 9330199G   | 0,106601 | -0,02608 | 0,077 | 0,099 | 1 |
| Rufy2      | 0,106829 | 0,067398 | 0,516 | 0,491 | 1 |
| Phax       | 0,106857 | -0,04338 | 0,53  | 0,569 | 1 |
| Tmem176a   | 0,106878 | 0,059103 | 0,111 | 0,086 | 1 |
| Mrpl52     | 0,106884 | -0,04527 | 0,637 | 0,683 | 1 |
| Ppp2r2d    | 0,106994 | 0,067634 | 0,536 | 0,509 | 1 |
| Olf552     | 0,107003 | -0,00893 | 0,009 | 0,018 | 1 |
| 4933427D   | 0,107014 | -0,02093 | 0,124 | 0,153 | 1 |
| Rmi1       | 0,107069 | -0,02953 | 0,131 | 0,159 | 1 |
| Btbd6      | 0,107072 | 0,030946 | 0,154 | 0,125 | 1 |
| Fam89b     | 0,107189 | 0,015138 | 0,025 | 0,013 | 1 |
| Gm49179    | 0,107189 | 0,020846 | 0,025 | 0,013 | 1 |
| Csnk2a2    | 0,107193 | -0,03035 | 0,441 | 0,488 | 1 |
| Mfsd13a    | 0,107237 | -0,03303 | 0,194 | 0,228 | 1 |
| Phactr1    | 0,107273 | -0,04055 | 0,894 | 0,883 | 1 |
| Zfp979     | 0,107325 | -0,02545 | 0,101 | 0,127 | 1 |
| Ndst2      | 0,107354 | -0,02226 | 0,078 | 0,101 | 1 |
| Pcf11      | 0,107369 | 0,067019 | 0,471 | 0,439 | 1 |
| Magee2     | 0,107688 | -0,0108  | 0,009 | 0,018 | 1 |
| Jmy        | 0,107744 | -0,04131 | 0,517 | 0,558 | 1 |
| Lrrc61     | 0,107817 | -0,01313 | 0,185 | 0,223 | 1 |
| Fam53a     | 0,107819 | -0,04597 | 0,286 | 0,32  | 1 |
| Papss1     | 0,107848 | -0,02579 | 0,942 | 0,967 | 1 |
| Mfap1b     | 0,107854 | -0,04479 | 0,527 | 0,569 | 1 |
| 2810402E2  | 0,107881 | -0,0047  | 0,105 | 0,133 | 1 |
| Ube2s      | 0,1079   | -0,03746 | 0,772 | 0,802 | 1 |
| Crkl       | 0,107905 | -0,023   | 0,38  | 0,429 | 1 |
| Daam2      | 0,107911 | -0,03794 | 0,922 | 0,935 | 1 |

|          |          |          |       |       |   |
|----------|----------|----------|-------|-------|---|
| Zfp984   | 0,107962 | 0,013227 | 0,025 | 0,013 | 1 |
| Anks6    | 0,10798  | -0,02025 | 0,052 | 0,072 | 1 |
| Pitpnb   | 0,108054 | -0,03527 | 0,536 | 0,585 | 1 |
| Zbtb26   | 0,108301 | -0,03235 | 0,108 | 0,135 | 1 |
| Taf4b    | 0,108363 | 0,015742 | 0,025 | 0,013 | 1 |
| Art3     | 0,108424 | -0,13467 | 0,158 | 0,184 | 1 |
| Psma2    | 0,108433 | -0,04587 | 0,885 | 0,901 | 1 |
| Ccdc34   | 0,108494 | -0,02835 | 0,479 | 0,527 | 1 |
| Msra     | 0,108519 | 0,026585 | 0,231 | 0,193 | 1 |
| Clcn6    | 0,108571 | 0,055811 | 0,539 | 0,507 | 1 |
| Ttc41    | 0,108614 | -0,00361 | 0,02  | 0,033 | 1 |
| Nucb1    | 0,108617 | 0,042763 | 0,522 | 0,498 | 1 |
| 1810055G | 0,10864  | -0,0325  | 0,117 | 0,143 | 1 |
| Pstpip2  | 0,108665 | -0,03543 | 0,194 | 0,226 | 1 |
| Nosip    | 0,108738 | -0,03145 | 0,383 | 0,424 | 1 |
| Gm26610  | 0,108739 | 0,011313 | 0,025 | 0,013 | 1 |
| Slc2a12  | 0,108796 | 0,012579 | 0,025 | 0,013 | 1 |
| Bach2    | 0,108827 | -0,02237 | 0,183 | 0,218 | 1 |
| Pea15a   | 0,108965 | 0,042009 | 0,982 | 0,982 | 1 |
| Sco1     | 0,10916  | -0,02098 | 0,107 | 0,133 | 1 |
| Chchd2   | 0,10916  | -0,02426 | 0,998 | 0,995 | 1 |
| Taf6     | 0,109708 | -0,04205 | 0,196 | 0,228 | 1 |
| Gm4524   | 0,109783 | -0,03892 | 0,114 | 0,14  | 1 |
| Hid1     | 0,109859 | -0,02869 | 0,405 | 0,459 | 1 |
| P3h4     | 0,109974 | -0,03087 | 0,662 | 0,706 | 1 |
| Setdb1   | 0,110024 | 0,035867 | 0,298 | 0,26  | 1 |
| Cdc25a   | 0,110071 | 0,021957 | 0,089 | 0,067 | 1 |
| Api5     | 0,110183 | -0,04295 | 0,51  | 0,554 | 1 |
| Pik3r2   | 0,110291 | 0,048864 | 0,331 | 0,299 | 1 |
| Atg13    | 0,110313 | -0,01614 | 0,261 | 0,304 | 1 |
| Fam57a   | 0,110375 | -0,04726 | 0,432 | 0,462 | 1 |
| Lsm5     | 0,110597 | -0,03715 | 0,596 | 0,623 | 1 |
| Hyal2    | 0,110601 | 0,029024 | 0,103 | 0,08  | 1 |
| Zfp101   | 0,110655 | -0,0676  | 0,372 | 0,4   | 1 |
| Anapc16  | 0,110663 | -0,04108 | 0,706 | 0,735 | 1 |
| Rnf225   | 0,110666 | 0,018931 | 0,049 | 0,033 | 1 |
| Tmem260  | 0,110713 | -0,04422 | 0,365 | 0,403 | 1 |
| Srgap2   | 0,110805 | -0,03635 | 0,296 | 0,335 | 1 |
| Gm28875  | 0,110826 | -0,02863 | 0,21  | 0,244 | 1 |
| Pcdhb22  | 0,111087 | -0,01891 | 0,091 | 0,115 | 1 |
| Rab33a   | 0,111136 | -0,066   | 0,223 | 0,254 | 1 |
| Fmn2     | 0,11115  | -0,01052 | 0,038 | 0,055 | 1 |
| Cpe      | 0,111309 | 0,064562 | 0,596 | 0,55  | 1 |
| Gm43263  | 0,111417 | -0,0184  | 0,048 | 0,067 | 1 |
| Ring1    | 0,111503 | 0,060831 | 0,553 | 0,52  | 1 |
| Dmtn     | 0,111546 | 0,013285 | 0,061 | 0,042 | 1 |
| Mest     | 0,111615 | -0,04855 | 0,149 | 0,177 | 1 |
| Xpo1     | 0,111703 | -0,02156 | 0,431 | 0,478 | 1 |
| Mmgt1    | 0,11174  | -0,03542 | 0,44  | 0,488 | 1 |
| Adgrg6   | 0,111826 | 0,015486 | 0,018 | 0,008 | 1 |
| Ptp4a1   | 0,111913 | -0,03569 | 0,995 | 0,997 | 1 |
| A930004D | 0,111942 | 0,013263 | 0,018 | 0,008 | 1 |

|          |          |          |       |       |   |
|----------|----------|----------|-------|-------|---|
| Epop     | 0,111942 | 0,014223 | 0,018 | 0,008 | 1 |
| Daxx     | 0,112012 | 0,028024 | 0,217 | 0,184 | 1 |
| Rbm10    | 0,112067 | -0,03455 | 0,342 | 0,385 | 1 |
| Gm4419   | 0,112226 | -0,02148 | 0,125 | 0,153 | 1 |
| 2310057M | 0,112278 | -0,01837 | 0,2   | 0,237 | 1 |
| Srcin1   | 0,112353 | 0,030815 | 0,966 | 0,969 | 1 |
| Myo9a    | 0,112627 | -0,04707 | 0,606 | 0,616 | 1 |
| Rhoc     | 0,112736 | 0,049846 | 0,447 | 0,408 | 1 |
| Gmfb     | 0,112805 | -0,02731 | 0,72  | 0,759 | 1 |
| Ift88    | 0,11284  | -0,02408 | 0,133 | 0,163 | 1 |
| Elk1     | 0,112911 | -0,02677 | 0,079 | 0,101 | 1 |
| Ints1    | 0,113096 | 0,034391 | 0,421 | 0,38  | 1 |
| Gm29502  | 0,113148 | -0,0131  | 0,008 | 0,016 | 1 |
| Coa4     | 0,113213 | -0,02295 | 0,107 | 0,133 | 1 |
| Tshb     | 0,113325 | 0,01069  | 0,018 | 0,008 | 1 |
| Slc8a3   | 0,113425 | -0,01955 | 0,149 | 0,18  | 1 |
| Lsm12    | 0,11344  | -0,04431 | 0,54  | 0,576 | 1 |
| Ythdf2   | 0,113518 | 0,031189 | 0,401 | 0,364 | 1 |
| Tnnt2    | 0,113608 | -0,01265 | 0,014 | 0,024 | 1 |
| Nudt13   | 0,113614 | -0,02219 | 0,39  | 0,434 | 1 |
| Rhbdd3   | 0,113633 | -0,01744 | 0,141 | 0,172 | 1 |
| Plekha3  | 0,113781 | -0,03434 | 0,238 | 0,272 | 1 |
| Arid4b   | 0,113817 | -0,03184 | 0,895 | 0,896 | 1 |
| Rps27    | 0,11391  | 0,046452 | 0,996 | 0,997 | 1 |
| Slc27a4  | 0,113973 | -0,05205 | 0,512 | 0,538 | 1 |
| Zfp706   | 0,114037 | 0,033922 | 0,994 | 0,995 | 1 |
| Pbld1    | 0,114113 | 0,013192 | 0,026 | 0,015 | 1 |
| Gm9873   | 0,11424  | -0,00991 | 0,008 | 0,016 | 1 |
| Aqp11    | 0,114335 | -0,0103  | 0,019 | 0,031 | 1 |
| Dusp18   | 0,114363 | -0,01248 | 0,052 | 0,072 | 1 |
| Smc1b    | 0,114725 | -0,00727 | 0,008 | 0,016 | 1 |
| Gfm1     | 0,114813 | -0,01549 | 0,175 | 0,208 | 1 |
| Zdhhc18  | 0,114851 | 0,042468 | 0,24  | 0,21  | 1 |
| Cbfb     | 0,114954 | -0,03217 | 0,418 | 0,46  | 1 |
| Rab10    | 0,114974 | -0,02749 | 0,98  | 0,974 | 1 |
| Tm4sf1   | 0,115124 | -0,00948 | 0,014 | 0,024 | 1 |
| Ambra1   | 0,115167 | -0,01155 | 0,195 | 0,233 | 1 |
| B9d2     | 0,115258 | -0,01945 | 0,077 | 0,099 | 1 |
| Eef1a2   | 0,115308 | -0,01136 | 0,023 | 0,036 | 1 |
| Mrpl23   | 0,115417 | -0,02281 | 0,7   | 0,764 | 1 |
| Flt3l    | 0,115621 | -0,00796 | 0,008 | 0,016 | 1 |
| Gm10036  | 0,115621 | -0,00796 | 0,008 | 0,016 | 1 |
| Polr2j   | 0,115653 | -0,03523 | 0,662 | 0,686 | 1 |
| Serp2    | 0,115682 | 0,041886 | 0,154 | 0,127 | 1 |
| Plekha7  | 0,11569  | -0,00699 | 0,008 | 0,016 | 1 |
| Tmem138  | 0,115784 | -0,01667 | 0,127 | 0,156 | 1 |
| Qtrt1    | 0,115833 | -0,02128 | 0,169 | 0,202 | 1 |
| Zfp809   | 0,115902 | -0,02308 | 0,149 | 0,18  | 1 |
| Erf      | 0,116008 | 0,071489 | 0,373 | 0,345 | 1 |
| Tut1     | 0,116091 | -0,01055 | 0,055 | 0,075 | 1 |
| Zfp26    | 0,116153 | -0,02022 | 0,216 | 0,252 | 1 |
| Ik       | 0,116159 | -0,0253  | 0,789 | 0,82  | 1 |

|           |          |          |       |       |   |
|-----------|----------|----------|-------|-------|---|
| Rp2       | 0,116163 | -0,02789 | 0,163 | 0,193 | 1 |
| Clybl     | 0,116263 | -0,01056 | 0,023 | 0,036 | 1 |
| Ccdc71l   | 0,116324 | -0,03789 | 0,168 | 0,198 | 1 |
| 5430431A: | 0,116324 | 0,022955 | 0,072 | 0,052 | 1 |
| Tmem248   | 0,116394 | 0,041462 | 0,313 | 0,28  | 1 |
| Tex2      | 0,116533 | 0,049143 | 0,694 | 0,659 | 1 |
| Tmed1     | 0,116575 | -0,03605 | 0,341 | 0,376 | 1 |
| Hsd3b7    | 0,116608 | 0,013608 | 0,013 | 0,005 | 1 |
| Gen1      | 0,116617 | 0,009691 | 0,026 | 0,015 | 1 |
| Aig1      | 0,116649 | -0,04045 | 0,933 | 0,927 | 1 |
| Ccdc130   | 0,116661 | -0,04472 | 0,146 | 0,174 | 1 |
| lfrd1     | 0,116715 | 0,043649 | 0,57  | 0,541 | 1 |
| Vmn1r12   | 0,116829 | 0,011679 | 0,013 | 0,005 | 1 |
| Parp16    | 0,116829 | 0,010713 | 0,013 | 0,005 | 1 |
| Hnrnpm    | 0,116859 | -0,03418 | 0,748 | 0,792 | 1 |
| Tk2       | 0,116899 | -0,01924 | 0,168 | 0,2   | 1 |
| Atp5g3    | 0,117018 | -0,02757 | 0,832 | 0,865 | 1 |
| Ppme1     | 0,117033 | -0,04357 | 0,433 | 0,47  | 1 |
| Dync1li2  | 0,117076 | 0,039716 | 0,886 | 0,885 | 1 |
| Dpysl2    | 0,117127 | 0,017263 | 0,999 | 1     | 1 |
| Cldn14    | 0,117127 | -0,02155 | 0,28  | 0,324 | 1 |
| Dennd4b   | 0,117211 | 0,055401 | 0,245 | 0,215 | 1 |
| Wdr6      | 0,117241 | -0,00946 | 0,03  | 0,046 | 1 |
| Imp3      | 0,117259 | -0,0319  | 0,741 | 0,782 | 1 |
| 1700055D: | 0,117272 | 0,007811 | 0,013 | 0,005 | 1 |
| Scx       | 0,117276 | 0,011027 | 0,013 | 0,005 | 1 |
| Spdya     | 0,117397 | 0,01983  | 0,03  | 0,018 | 1 |
| Gtf2b     | 0,117604 | -0,04091 | 0,491 | 0,533 | 1 |
| H2-Ke6    | 0,117622 | -0,02937 | 0,384 | 0,429 | 1 |
| Gtf3c1    | 0,11764  | -0,02257 | 0,465 | 0,52  | 1 |
| Mtmr6     | 0,117663 | -0,03708 | 0,577 | 0,605 | 1 |
| Rpusd1    | 0,117706 | -0,02265 | 0,097 | 0,122 | 1 |
| Gm10306   | 0,117721 | 0,011027 | 0,013 | 0,005 | 1 |
| Mettl4    | 0,117743 | -0,01715 | 0,061 | 0,081 | 1 |
| Zfp397    | 0,117785 | -0,02707 | 0,437 | 0,472 | 1 |
| Trappc11  | 0,117979 | -0,00998 | 0,222 | 0,262 | 1 |
| Spata33   | 0,118018 | 0,007162 | 0,013 | 0,005 | 1 |
| Fntb      | 0,118075 | -0,0928  | 0,371 | 0,405 | 1 |
| Ncapd2    | 0,118113 | -0,01764 | 0,074 | 0,096 | 1 |
| Flvcr1    | 0,118165 | -0,03219 | 0,116 | 0,141 | 1 |
| Gm49077   | 0,118241 | 0,006194 | 0,013 | 0,005 | 1 |
| Herpud1   | 0,118263 | 0,065377 | 0,471 | 0,437 | 1 |
| Rwdd1     | 0,11828  | -0,04603 | 0,667 | 0,678 | 1 |
| Lrrcc1    | 0,118425 | -0,03215 | 0,274 | 0,312 | 1 |
| Actr1a    | 0,118459 | -0,03522 | 0,83  | 0,847 | 1 |
| Rpl34     | 0,118461 | 0,038337 | 0,993 | 0,993 | 1 |
| Cdc42se1  | 0,11853  | -0,04483 | 0,563 | 0,587 | 1 |
| Nf1       | 0,118621 | -0,02512 | 0,748 | 0,779 | 1 |
| Emp3      | 0,118823 | 0,031322 | 0,072 | 0,052 | 1 |
| Pigp      | 0,118858 | 0,055094 | 0,645 | 0,631 | 1 |
| Phkg1     | 0,118972 | 0,028053 | 0,056 | 0,039 | 1 |
| Cisd1     | 0,119026 | -0,01388 | 0,881 | 0,907 | 1 |

|           |          |          |       |       |   |
|-----------|----------|----------|-------|-------|---|
| Gga1      | 0,119102 | 0,047963 | 0,349 | 0,314 | 1 |
| Ube2a     | 0,119144 | -0,01945 | 0,342 | 0,384 | 1 |
| Lcor      | 0,119152 | -0,02778 | 0,246 | 0,283 | 1 |
| Gpr89     | 0,119264 | -0,02386 | 0,295 | 0,337 | 1 |
| Zfp518a   | 0,119358 | -0,03736 | 0,283 | 0,319 | 1 |
| Elmod2    | 0,119398 | -0,04536 | 0,272 | 0,306 | 1 |
| Lmln      | 0,119436 | 0,029332 | 0,103 | 0,08  | 1 |
| Oard1     | 0,119445 | -0,0212  | 0,402 | 0,455 | 1 |
| Ids       | 0,119485 | -0,03523 | 0,799 | 0,823 | 1 |
| Pabpc4    | 0,119505 | 0,037337 | 0,159 | 0,132 | 1 |
| Mybl1     | 0,119662 | -0,02496 | 0,076 | 0,098 | 1 |
| Ctnna3    | 0,119958 | -0,03786 | 0,387 | 0,42  | 1 |
| Ikbke     | 0,120055 | 0,003918 | 0,004 | 0     | 1 |
| Gm16701.  | 0,120055 | 0,003918 | 0,004 | 0     | 1 |
| Armc3     | 0,120055 | 0,003918 | 0,004 | 0     | 1 |
| Olfr1122  | 0,120055 | 0,003918 | 0,004 | 0     | 1 |
| Grem1     | 0,120055 | 0,003918 | 0,004 | 0     | 1 |
| Xlr3a     | 0,120055 | 0,003918 | 0,004 | 0     | 1 |
| Pik3cd    | 0,120055 | 0,003918 | 0,004 | 0     | 1 |
| Gm49027   | 0,120055 | 0,003918 | 0,004 | 0     | 1 |
| A430078IO | 0,120055 | 0,003918 | 0,004 | 0     | 1 |
| Olfr571   | 0,120055 | 0,003918 | 0,004 | 0     | 1 |
| Itgal     | 0,120055 | 0,003918 | 0,004 | 0     | 1 |
| D030034A  | 0,120055 | 0,003918 | 0,004 | 0     | 1 |
| Itga7     | 0,120055 | 0,003918 | 0,004 | 0     | 1 |
| Isyna1    | 0,120055 | 0,003918 | 0,004 | 0     | 1 |
| Ankle1    | 0,120055 | 0,003918 | 0,004 | 0     | 1 |
| Olfr975   | 0,120055 | 0,003918 | 0,004 | 0     | 1 |
| Fxyd2     | 0,120055 | 0,003918 | 0,004 | 0     | 1 |
| Gatsl3    | 0,120055 | 0,003918 | 0,004 | 0     | 1 |
| Vstm2a    | 0,120055 | 0,003918 | 0,004 | 0     | 1 |
| Igfbp4    | 0,120055 | 0,003918 | 0,004 | 0     | 1 |
| Cartpt    | 0,120055 | 0,003918 | 0,004 | 0     | 1 |
| 4931403G  | 0,120055 | 0,003918 | 0,004 | 0     | 1 |
| Gdnf      | 0,120055 | 0,003918 | 0,004 | 0     | 1 |
| Nckap5los | 0,120055 | 0,003918 | 0,004 | 0     | 1 |
| Gm16537   | 0,120055 | 0,003918 | 0,004 | 0     | 1 |
| AC110166. | 0,120055 | 0,003918 | 0,004 | 0     | 1 |
| Has1      | 0,120055 | 0,003918 | 0,004 | 0     | 1 |
| Fads2     | 0,120055 | 0,003918 | 0,004 | 0     | 1 |
| Ms4a4c    | 0,120055 | 0,003918 | 0,004 | 0     | 1 |
| Gm16541   | 0,120055 | 0,003918 | 0,004 | 0     | 1 |
| Timp1     | 0,120055 | 0,010737 | 0,004 | 0     | 1 |
| lsg20     | 0,120055 | 0,009766 | 0,004 | 0     | 1 |
| 2410004P( | 0,120055 | 0,008793 | 0,004 | 0     | 1 |
| Gm7697    | 0,120055 | 0,006846 | 0,004 | 0     | 1 |
| Fam209    | 0,120055 | 0,005871 | 0,004 | 0     | 1 |
| Gm26762   | 0,120055 | 0,005871 | 0,004 | 0     | 1 |
| Cfap45    | 0,120055 | 0,004895 | 0,004 | 0     | 1 |
| Slc32a1   | 0,120055 | 0,004895 | 0,004 | 0     | 1 |
| Lor       | 0,120055 | 0,004895 | 0,004 | 0     | 1 |
| Cd52      | 0,120055 | 0,004895 | 0,004 | 0     | 1 |

|           |          |          |       |       |   |
|-----------|----------|----------|-------|-------|---|
| A930003O  | 0,120055 | 0,004895 | 0,004 | 0     | 1 |
| Pon3      | 0,120055 | 0,004895 | 0,004 | 0     | 1 |
| Tex15     | 0,120055 | 0,004895 | 0,004 | 0     | 1 |
| Zglp1     | 0,120055 | 0,004895 | 0,004 | 0     | 1 |
| Wfdc17    | 0,120055 | 0,004895 | 0,004 | 0     | 1 |
| Gpx2      | 0,120055 | 0,004895 | 0,004 | 0     | 1 |
| Clip4     | 0,120055 | 0,004895 | 0,004 | 0     | 1 |
| Fam69c    | 0,120055 | 0,004895 | 0,004 | 0     | 1 |
| Stab1     | 0,120055 | 0,005871 | 0,004 | 0     | 1 |
| Adra1a    | 0,120055 | 0,006846 | 0,004 | 0     | 1 |
| Scn7a     | 0,120055 | 0,009766 | 0,004 | 0     | 1 |
| Smim4     | 0,120081 | -0,02897 | 0,181 | 0,211 | 1 |
| Gpr137    | 0,120105 | -0,0393  | 0,316 | 0,353 | 1 |
| Haus3     | 0,120167 | -0,03391 | 0,238 | 0,275 | 1 |
| Cyc1      | 0,120196 | -0,0408  | 0,723 | 0,764 | 1 |
| Lat2      | 0,120315 | 0,020123 | 0,032 | 0,02  | 1 |
| Bloc1s6os | 0,120408 | 0,017398 | 0,02  | 0,01  | 1 |
| Mrs2      | 0,12044  | -0,02188 | 0,275 | 0,315 | 1 |
| Nipal3    | 0,120501 | -0,03001 | 0,48  | 0,54  | 1 |
| Emc7      | 0,120629 | 0,04061  | 0,944 | 0,928 | 1 |
| Pla2g6    | 0,120812 | -0,01447 | 0,135 | 0,166 | 1 |
| Tmem250-  | 0,120819 | -0,0359  | 0,34  | 0,377 | 1 |
| Nedd8     | 0,120831 | 0,041378 | 0,899 | 0,876 | 1 |
| Slf1      | 0,121051 | -0,02403 | 0,226 | 0,26  | 1 |
| Egfl8     | 0,121123 | 0,02026  | 0,02  | 0,01  | 1 |
| Pkd2      | 0,12114  | -0,03905 | 0,356 | 0,39  | 1 |
| Lonrf2    | 0,121153 | -0,01885 | 0,029 | 0,044 | 1 |
| Surf2     | 0,121177 | -0,03764 | 0,295 | 0,33  | 1 |
| Cntn3     | 0,121185 | -0,03192 | 0,169 | 0,2   | 1 |
| 33000021O | 0,121251 | -0,02088 | 0,026 | 0,039 | 1 |
| Ap3m1     | 0,121251 | -0,05648 | 0,527 | 0,561 | 1 |
| Calcoco1  | 0,121272 | -0,04245 | 0,378 | 0,416 | 1 |
| Yif1b     | 0,12134  | 0,04765  | 0,611 | 0,576 | 1 |
| Pgap2     | 0,121341 | 0,054177 | 0,574 | 0,553 | 1 |
| Trip4     | 0,121365 | -0,02881 | 0,398 | 0,441 | 1 |
| 4930455G  | 0,121484 | 0,024739 | 0,034 | 0,021 | 1 |
| Adk       | 0,121539 | -0,00653 | 0,626 | 0,675 | 1 |
| Gmnn      | 0,121573 | -0,0173  | 0,073 | 0,094 | 1 |
| Rgs17     | 0,121589 | 0,034831 | 0,04  | 0,026 | 1 |
| Ehd4      | 0,121675 | 0,042178 | 0,162 | 0,135 | 1 |
| Cachd1    | 0,121701 | -0,04065 | 0,21  | 0,242 | 1 |
| Ak5       | 0,121754 | -0,01195 | 0,018 | 0,029 | 1 |
| Gpr146    | 0,121823 | -0,02975 | 0,144 | 0,172 | 1 |
| Pisd      | 0,121882 | -0,02324 | 0,345 | 0,39  | 1 |
| Cox19     | 0,121981 | -0,03761 | 0,383 | 0,42  | 1 |
| 5031425E2 | 0,121987 | -0,03553 | 0,269 | 0,302 | 1 |
| C1galt1c1 | 0,122077 | -0,02564 | 0,343 | 0,384 | 1 |
| Cdo1      | 0,122177 | -0,00928 | 0,007 | 0,015 | 1 |
| Tmem210   | 0,122201 | 0,01069  | 0,02  | 0,01  | 1 |
| Zfp456    | 0,122201 | 0,01069  | 0,02  | 0,01  | 1 |
| 6230400D  | 0,122247 | 0,022349 | 0,054 | 0,037 | 1 |
| Zmynd8    | 0,122262 | -0,039   | 0,752 | 0,772 | 1 |

|           |          |          |       |       |   |
|-----------|----------|----------|-------|-------|---|
| Dpysl3    | 0,122332 | -0,00991 | 0,007 | 0,015 | 1 |
| Fndc3a    | 0,122441 | -0,03481 | 0,3   | 0,338 | 1 |
| BC037034  | 0,122465 | 0,023415 | 0,114 | 0,089 | 1 |
| Apobec3   | 0,122485 | -0,00712 | 0,001 | 0,005 | 1 |
| Slc25a43  | 0,122485 | -0,01034 | 0,001 | 0,005 | 1 |
| Slc6a19   | 0,122485 | -0,01034 | 0,001 | 0,005 | 1 |
| Gm6525    | 0,122486 | -0,00699 | 0,007 | 0,015 | 1 |
| Kifc2     | 0,122496 | 0,036693 | 0,175 | 0,146 | 1 |
| Nme7      | 0,122586 | -0,01106 | 0,058 | 0,078 | 1 |
| Tmem110   | 0,122625 | 0,036809 | 0,369 | 0,33  | 1 |
| Dnah7a    | 0,122638 | -0,0055  | 0,001 | 0,005 | 1 |
| Ihh       | 0,122638 | -0,0055  | 0,001 | 0,005 | 1 |
| Gm38251   | 0,122638 | -0,0055  | 0,001 | 0,005 | 1 |
| Scn3a     | 0,122638 | -0,0055  | 0,001 | 0,005 | 1 |
| Pdyn      | 0,122638 | -0,0055  | 0,001 | 0,005 | 1 |
| Hs6st2    | 0,122638 | -0,0055  | 0,001 | 0,005 | 1 |
| Ppargc1a  | 0,122638 | -0,0055  | 0,001 | 0,005 | 1 |
| Pde3a     | 0,122638 | -0,0055  | 0,001 | 0,005 | 1 |
| Cyp2e1    | 0,122638 | -0,0055  | 0,001 | 0,005 | 1 |
| Fat3      | 0,122638 | -0,0055  | 0,001 | 0,005 | 1 |
| L3hypdh   | 0,122638 | -0,0055  | 0,001 | 0,005 | 1 |
| Gm30159   | 0,122638 | -0,0055  | 0,001 | 0,005 | 1 |
| Gm47123   | 0,122713 | -0,00768 | 0,007 | 0,015 | 1 |
| Slc1a1    | 0,122713 | -0,00768 | 0,007 | 0,015 | 1 |
| Rxrg      | 0,122791 | -0,00389 | 0,001 | 0,005 | 1 |
| Chrna4    | 0,122791 | -0,00389 | 0,001 | 0,005 | 1 |
| Was       | 0,122791 | -0,00389 | 0,001 | 0,005 | 1 |
| Igsf1     | 0,122791 | -0,00389 | 0,001 | 0,005 | 1 |
| Cd1d1     | 0,122791 | -0,00389 | 0,001 | 0,005 | 1 |
| Zfp981    | 0,122791 | -0,00389 | 0,001 | 0,005 | 1 |
| Disp3     | 0,122791 | -0,00389 | 0,001 | 0,005 | 1 |
| Gm17216   | 0,122791 | -0,00389 | 0,001 | 0,005 | 1 |
| Usp29     | 0,122791 | -0,00389 | 0,001 | 0,005 | 1 |
| Pcbd1     | 0,122791 | -0,00389 | 0,001 | 0,005 | 1 |
| Necab2    | 0,122791 | -0,00389 | 0,001 | 0,005 | 1 |
| Gm2237    | 0,122791 | -0,00389 | 0,001 | 0,005 | 1 |
| Zfp558    | 0,122791 | -0,00389 | 0,001 | 0,005 | 1 |
| Obscn     | 0,122791 | -0,00389 | 0,001 | 0,005 | 1 |
| Ptges3l   | 0,122791 | -0,00389 | 0,001 | 0,005 | 1 |
| 1700001L1 | 0,122791 | -0,00389 | 0,001 | 0,005 | 1 |
| Rnf180    | 0,122791 | -0,00389 | 0,001 | 0,005 | 1 |
| Gm47997   | 0,122791 | -0,00389 | 0,001 | 0,005 | 1 |
| Dbpht2    | 0,122791 | -0,00389 | 0,001 | 0,005 | 1 |
| Tex33     | 0,122791 | -0,00389 | 0,001 | 0,005 | 1 |
| Espl1     | 0,122791 | -0,00389 | 0,001 | 0,005 | 1 |
| Gm15328   | 0,122791 | -0,00389 | 0,001 | 0,005 | 1 |
| Rab27b    | 0,122791 | -0,00389 | 0,001 | 0,005 | 1 |
| Gal       | 0,122791 | -0,00389 | 0,001 | 0,005 | 1 |
| Olf1459   | 0,122791 | -0,00389 | 0,001 | 0,005 | 1 |
| Map3k1    | 0,122839 | 0,016641 | 0,032 | 0,02  | 1 |
| Cmpk1     | 0,122979 | -0,04913 | 0,525 | 0,556 | 1 |
| Tmem57    | 0,123043 | -0,02857 | 0,508 | 0,54  | 1 |



|          |          |          |       |       |   |
|----------|----------|----------|-------|-------|---|
| Cbln2    | 0,123098 | -0,00452 | 0,001 | 0,005 | 1 |
| Fuz      | 0,123145 | -0,02623 | 0,202 | 0,234 | 1 |
| Amacr    | 0,123182 | 0,024053 | 0,08  | 0,06  | 1 |
| Diaph2   | 0,123232 | -0,03998 | 0,231 | 0,267 | 1 |
| Pax3     | 0,123252 | 0,003927 | 0,001 | 0,005 | 1 |
| Ncaph    | 0,123252 | -0,00291 | 0,001 | 0,005 | 1 |
| Gabrg1   | 0,123252 | -0,00291 | 0,001 | 0,005 | 1 |
| Adcy7    | 0,123252 | -0,00291 | 0,001 | 0,005 | 1 |
| Naalad2  | 0,123252 | -0,00291 | 0,001 | 0,005 | 1 |
| Cntnap1  | 0,123252 | -0,00291 | 0,001 | 0,005 | 1 |
| Snx33    | 0,123431 | -0,02557 | 0,42  | 0,465 | 1 |
| Plxna2   | 0,123439 | -0,02116 | 0,104 | 0,13  | 1 |
| Hccs     | 0,123487 | -0,03916 | 0,484 | 0,525 | 1 |
| Arnt     | 0,12349  | -0,0364  | 0,357 | 0,39  | 1 |
| Proscos  | 0,123526 | -0,01465 | 0,026 | 0,039 | 1 |
| Zmynd19  | 0,123541 | -0,02983 | 0,135 | 0,163 | 1 |
| Fmc1     | 0,123561 | 0,027832 | 0,605 | 0,566 | 1 |
| Smad7    | 0,123625 | 0,046035 | 0,979 | 0,993 | 1 |
| Orai2    | 0,123627 | -0,01142 | 0,013 | 0,023 | 1 |
| Nfx1     | 0,123696 | -0,04237 | 0,401 | 0,439 | 1 |
| Tox2     | 0,123753 | -0,01265 | 0,013 | 0,023 | 1 |
| Mydgf    | 0,12385  | -0,0305  | 0,646 | 0,699 | 1 |
| Irf8     | 0,123953 | -0,00374 | 0,007 | 0,015 | 1 |
| Nbn      | 0,123964 | -0,02917 | 0,157 | 0,187 | 1 |
| Tnpo1    | 0,123964 | -0,03105 | 0,427 | 0,473 | 1 |
| Tmem206  | 0,12398  | 0,031758 | 0,143 | 0,117 | 1 |
| Pikfyve  | 0,123996 | -0,0352  | 0,409 | 0,455 | 1 |
| 1500015A | 0,124192 | 0,014714 | 0,07  | 0,05  | 1 |
| Tmem55a  | 0,124197 | -0,02253 | 0,169 | 0,2   | 1 |
| Actl6a   | 0,124348 | -0,04652 | 0,413 | 0,446 | 1 |
| Lypd1    | 0,124382 | 0,083183 | 0,036 | 0,023 | 1 |
| Ggt1     | 0,124437 | 0,019096 | 0,062 | 0,044 | 1 |
| Trappc12 | 0,124565 | -0,03703 | 0,372 | 0,411 | 1 |
| Poldip2  | 0,124624 | -0,02835 | 0,401 | 0,446 | 1 |
| Trak2    | 0,124664 | 0,033812 | 0,168 | 0,14  | 1 |
| Cpsf3    | 0,124672 | -0,03184 | 0,352 | 0,39  | 1 |
| Rps6kb1  | 0,124686 | 0,052016 | 0,58  | 0,561 | 1 |
| Ddi2     | 0,124792 | -0,02024 | 0,288 | 0,327 | 1 |
| Lamp1    | 0,124888 | 0,028669 | 0,999 | 1     | 1 |
| Tcf20    | 0,124897 | -0,03101 | 0,24  | 0,275 | 1 |
| Dennd1b  | 0,124928 | -0,01325 | 0,026 | 0,039 | 1 |
| Topbp1   | 0,124955 | -0,01777 | 0,19  | 0,226 | 1 |
| Ap3s2    | 0,12515  | -0,03699 | 0,349 | 0,387 | 1 |
| Fez1     | 0,125291 | -0,02595 | 0,998 | 1     | 1 |
| Nfib     | 0,12557  | -0,03984 | 0,886 | 0,893 | 1 |
| Ppm1a    | 0,125602 | -0,01926 | 0,785 | 0,821 | 1 |
| Ehmt1    | 0,125653 | -0,02757 | 0,367 | 0,41  | 1 |
| Asxl3    | 0,125682 | -0,0305  | 0,306 | 0,343 | 1 |
| Slc30a6  | 0,125871 | -0,0166  | 0,145 | 0,176 | 1 |
| Manba    | 0,125873 | 0,038452 | 0,226 | 0,197 | 1 |
| Tram2    | 0,125943 | 0,035027 | 0,107 | 0,085 | 1 |
| G3bp2    | 0,125944 | -0,02844 | 0,803 | 0,849 | 1 |

|           |          |          |       |       |   |
|-----------|----------|----------|-------|-------|---|
| Shroom1   | 0,125968 | -0,04062 | 0,293 | 0,332 | 1 |
| Zswim9    | 0,125997 | -0,0204  | 0,133 | 0,161 | 1 |
| Unc119b   | 0,1261   | -0,02416 | 0,102 | 0,127 | 1 |
| Papola    | 0,126144 | -0,02361 | 0,689 | 0,728 | 1 |
| Ntpcr     | 0,126192 | -0,02932 | 0,194 | 0,226 | 1 |
| Ndfip2    | 0,126226 | -0,02665 | 0,81  | 0,842 | 1 |
| Tti2      | 0,126239 | -0,02178 | 0,132 | 0,159 | 1 |
| Dcaf15    | 0,126302 | -0,02176 | 0,146 | 0,176 | 1 |
| 2610002M  | 0,126319 | -0,03029 | 0,163 | 0,192 | 1 |
| Pcnt      | 0,126346 | -0,01848 | 0,277 | 0,319 | 1 |
| Ncs1      | 0,126449 | -0,03281 | 0,171 | 0,2   | 1 |
| Gk        | 0,126457 | -0,01901 | 0,091 | 0,115 | 1 |
| Gm9938    | 0,126528 | -0,01619 | 0,05  | 0,068 | 1 |
| Atp5k     | 0,126642 | -0,03802 | 0,978 | 0,976 | 1 |
| Snx15     | 0,126732 | 0,047148 | 0,814 | 0,818 | 1 |
| Olfm1     | 0,126757 | -0,04754 | 0,398 | 0,433 | 1 |
| Stxbp5l   | 0,126886 | -0,01992 | 0,032 | 0,047 | 1 |
| Lxn       | 0,126951 | -0,00693 | 0,013 | 0,023 | 1 |
| Adgrb2    | 0,12702  | -0,02689 | 0,122 | 0,148 | 1 |
| Sar1b     | 0,127064 | -0,03814 | 0,666 | 0,701 | 1 |
| Tdp2      | 0,127074 | -0,04275 | 0,218 | 0,249 | 1 |
| Ccdc88c   | 0,127123 | -0,02185 | 0,056 | 0,075 | 1 |
| Mrpl18    | 0,127184 | -0,03673 | 0,586 | 0,616 | 1 |
| Nrbp1     | 0,127199 | 0,035764 | 0,353 | 0,317 | 1 |
| Hoxa5     | 0,12721  | 0,023637 | 0,044 | 0,029 | 1 |
| Trim59    | 0,12722  | 0,058986 | 0,972 | 0,969 | 1 |
| Tomm22    | 0,127356 | -0,02289 | 0,721 | 0,764 | 1 |
| Lgmn      | 0,127472 | -0,02087 | 0,906 | 0,922 | 1 |
| Mpp6      | 0,127558 | -0,01818 | 0,053 | 0,072 | 1 |
| Csk       | 0,127644 | -0,01804 | 0,29  | 0,333 | 1 |
| Zfp282    | 0,127654 | -0,01823 | 0,169 | 0,2   | 1 |
| Usb1      | 0,127691 | -0,01503 | 0,073 | 0,094 | 1 |
| Spcs2     | 0,12791  | 0,047774 | 0,953 | 0,953 | 1 |
| Efs       | 0,127928 | 0,058854 | 0,263 | 0,231 | 1 |
| Slirp     | 0,127958 | -0,03069 | 0,647 | 0,685 | 1 |
| Adamts20  | 0,128129 | -0,02405 | 0,159 | 0,189 | 1 |
| Cpeb2     | 0,128139 | -0,03835 | 0,818 | 0,829 | 1 |
| Cacna1c   | 0,128193 | -0,01214 | 0,036 | 0,052 | 1 |
| Snrpg     | 0,128216 | 0,052023 | 0,725 | 0,725 | 1 |
| Khynyn    | 0,128278 | 0,032226 | 0,135 | 0,111 | 1 |
| Cry1      | 0,128413 | -0,03527 | 0,207 | 0,239 | 1 |
| Ddx6      | 0,128483 | 0,052719 | 0,901 | 0,87  | 1 |
| Aptx      | 0,128559 | -0,03495 | 0,224 | 0,257 | 1 |
| Gm8186    | 0,128568 | -0,02748 | 0,077 | 0,098 | 1 |
| Vangl2    | 0,128569 | -0,02759 | 0,183 | 0,213 | 1 |
| Tmem161k  | 0,12858  | 0,029646 | 0,263 | 0,229 | 1 |
| Slc16a6   | 0,128658 | -0,02241 | 0,147 | 0,176 | 1 |
| Bahcc1    | 0,128671 | -0,00816 | 0,135 | 0,166 | 1 |
| Leprotil1 | 0,128687 | -0,03031 | 0,553 | 0,587 | 1 |
| Slc31a2   | 0,128697 | -0,02267 | 0,385 | 0,433 | 1 |
| E130308A1 | 0,128773 | -0,04158 | 0,439 | 0,483 | 1 |
| Ttc37     | 0,128802 | -0,02315 | 0,216 | 0,25  | 1 |

|           |          |          |       |       |   |
|-----------|----------|----------|-------|-------|---|
| Mafk      | 0,129114 | 0,056059 | 0,165 | 0,14  | 1 |
| Ski       | 0,129239 | 0,053222 | 0,538 | 0,507 | 1 |
| Gtf3a     | 0,129242 | -0,03428 | 0,494 | 0,532 | 1 |
| Sh3pxd2b  | 0,129295 | -0,01803 | 0,039 | 0,055 | 1 |
| Rps2      | 0,129329 | 0,051942 | 0,992 | 0,992 | 1 |
| Apba1     | 0,129378 | 0,061088 | 0,469 | 0,455 | 1 |
| Nagpa     | 0,129398 | -0,03119 | 0,282 | 0,317 | 1 |
| Sirt7     | 0,129404 | -0,0308  | 0,38  | 0,413 | 1 |
| Fer       | 0,129415 | -0,03103 | 0,213 | 0,244 | 1 |
| Kctd6     | 0,129434 | 0,02779  | 0,181 | 0,151 | 1 |
| Atp2b4    | 0,129567 | -0,01248 | 0,006 | 0,013 | 1 |
| Mfsd1     | 0,129617 | -0,02717 | 0,214 | 0,247 | 1 |
| Pgrmc2    | 0,129716 | -0,03445 | 0,571 | 0,605 | 1 |
| Ehhadh    | 0,12972  | 0,024768 | 0,071 | 0,052 | 1 |
| Zfp330    | 0,129756 | -0,01352 | 0,274 | 0,315 | 1 |
| Akap13    | 0,129786 | -0,02268 | 0,053 | 0,072 | 1 |
| Vps33a    | 0,129796 | -0,03815 | 0,23  | 0,26  | 1 |
| Smim14    | 0,12991  | -0,02791 | 0,837 | 0,865 | 1 |
| Mapk6     | 0,130165 | -0,0316  | 0,39  | 0,428 | 1 |
| 4930537H: | 0,130168 | -0,00928 | 0,006 | 0,013 | 1 |
| Lclat1    | 0,130314 | -0,02148 | 0,078 | 0,099 | 1 |
| Gm43653   | 0,13051  | -0,00705 | 0,006 | 0,013 | 1 |
| Psg16     | 0,13051  | -0,00705 | 0,006 | 0,013 | 1 |
| Gm4707    | 0,130519 | -0,01467 | 0,053 | 0,072 | 1 |
| Ly96      | 0,130566 | -0,01639 | 0,039 | 0,055 | 1 |
| Svbp      | 0,130632 | 0,043769 | 0,335 | 0,299 | 1 |
| Zfp276    | 0,130736 | 0,032322 | 0,354 | 0,319 | 1 |
| Trappc8   | 0,130745 | -0,03031 | 0,376 | 0,416 | 1 |
| Kdm6b     | 0,130784 | 0,116903 | 0,2   | 0,176 | 1 |
| Mut       | 0,130881 | -0,02707 | 0,439 | 0,494 | 1 |
| Pdpf      | 0,130898 | -0,04097 | 0,633 | 0,675 | 1 |
| Efcc1     | 0,130988 | -0,05465 | 0,186 | 0,213 | 1 |
| Zfp260    | 0,131023 | -0,02793 | 0,406 | 0,447 | 1 |
| Cnnm3     | 0,131034 | -0,03944 | 0,308 | 0,341 | 1 |
| Dgki      | 0,131063 | -0,0186  | 0,296 | 0,338 | 1 |
| Rnf11     | 0,131079 | -0,03792 | 0,62  | 0,644 | 1 |
| Zfp58     | 0,131234 | -0,0133  | 0,07  | 0,091 | 1 |
| St3gal2   | 0,131253 | -0,02444 | 0,162 | 0,192 | 1 |
| Edem3     | 0,131338 | -0,01065 | 0,232 | 0,27  | 1 |
| Fastkd1   | 0,131494 | 0,040605 | 0,15  | 0,125 | 1 |
| Zfp36l2   | 0,131559 | 0,08911  | 0,577 | 0,543 | 1 |
| Galnt10   | 0,131663 | -0,02938 | 0,146 | 0,174 | 1 |
| E330009JO | 0,131701 | -0,03238 | 0,5   | 0,54  | 1 |
| Sh2b3     | 0,131714 | -0,0107  | 0,05  | 0,068 | 1 |
| Nupl2     | 0,13175  | -0,01875 | 0,059 | 0,078 | 1 |
| Trim21    | 0,131769 | -0,02425 | 0,052 | 0,07  | 1 |
| Eci1      | 0,131811 | -0,0465  | 0,531 | 0,561 | 1 |
| Pde5a     | 0,131897 | -0,00413 | 0,006 | 0,013 | 1 |
| C1qtnf12  | 0,131973 | 0,012446 | 0,084 | 0,063 | 1 |
| Ankrd17   | 0,132131 | -0,00411 | 0,589 | 0,639 | 1 |
| Fbf1      | 0,132152 | -0,02716 | 0,158 | 0,187 | 1 |
| Lyn       | 0,13216  | 0,008461 | 0,01  | 0,003 | 1 |

|           |          |          |       |       |   |
|-----------|----------|----------|-------|-------|---|
| Cox6a1    | 0,13221  | 0,029791 | 0,971 | 0,974 | 1 |
| Ormdl3    | 0,132228 | -0,01844 | 0,342 | 0,387 | 1 |
| Dxo       | 0,132272 | -0,03233 | 0,179 | 0,208 | 1 |
| Srp54c    | 0,132325 | -0,0206  | 0,055 | 0,073 | 1 |
| Pilrb2    | 0,132348 | 0,008461 | 0,01  | 0,003 | 1 |
| B130011K  | 0,132348 | 0,008461 | 0,01  | 0,003 | 1 |
| Rpp40     | 0,132362 | -0,01756 | 0,093 | 0,117 | 1 |
| Rexo2     | 0,132379 | -0,03347 | 0,851 | 0,878 | 1 |
| Fam241a   | 0,132398 | 0,028094 | 0,276 | 0,241 | 1 |
| Gm14308   | 0,132535 | 0,006519 | 0,01  | 0,003 | 1 |
| Fam196a   | 0,132535 | 0,006519 | 0,01  | 0,003 | 1 |
| Tgds      | 0,132566 | -0,01564 | 0,084 | 0,107 | 1 |
| Psme2     | 0,132785 | -0,11709 | 0,369 | 0,403 | 1 |
| Plppr2    | 0,132908 | -0,01306 | 0,063 | 0,083 | 1 |
| Gm10516   | 0,132967 | 0,010062 | 0,015 | 0,007 | 1 |
| Usp38     | 0,132979 | -0,01905 | 0,195 | 0,231 | 1 |
| E2f2      | 0,132981 | -0,01099 | 0,017 | 0,028 | 1 |
| Mia3      | 0,133085 | -0,04445 | 0,506 | 0,541 | 1 |
| Fzd1      | 0,133103 | 0,006841 | 0,01  | 0,003 | 1 |
| Gm26852   | 0,133103 | 0,006841 | 0,01  | 0,003 | 1 |
| Dpm3      | 0,133479 | -0,03266 | 0,805 | 0,829 | 1 |
| Thsd7b    | 0,13348  | 0,0049   | 0,01  | 0,003 | 1 |
| Odf3l2    | 0,13348  | 0,001668 | 0,01  | 0,003 | 1 |
| Rbm5      | 0,133496 | -0,03989 | 0,824 | 0,842 | 1 |
| Fam228a   | 0,1335   | -0,02307 | 0,071 | 0,091 | 1 |
| Sez6l2    | 0,133514 | -0,03307 | 0,967 | 0,963 | 1 |
| Gmpr2     | 0,133649 | -0,02222 | 0,323 | 0,363 | 1 |
| Trim45    | 0,13367  | -0,02102 | 0,083 | 0,106 | 1 |
| Paip2     | 0,133731 | -0,0331  | 0,961 | 0,977 | 1 |
| Ube2q2    | 0,133776 | -0,03921 | 0,333 | 0,359 | 1 |
| Tma16     | 0,133779 | -0,02416 | 0,276 | 0,307 | 1 |
| Cep295nl  | 0,133946 | -0,01003 | 0,017 | 0,028 | 1 |
| Slc3a2    | 0,134101 | -0,02575 | 0,795 | 0,829 | 1 |
| Timeless  | 0,134243 | -0,01742 | 0,025 | 0,037 | 1 |
| Rapsn     | 0,134388 | 0,00925  | 0,06  | 0,042 | 1 |
| Hacd1     | 0,134472 | 0,04574  | 0,421 | 0,387 | 1 |
| Pfkfb3    | 0,134497 | 0,032122 | 0,228 | 0,197 | 1 |
| Bola1     | 0,134515 | -0,03872 | 0,328 | 0,364 | 1 |
| Slc22a17  | 0,134558 | 0,040915 | 0,919 | 0,943 | 1 |
| Galnt16   | 0,134606 | -0,02295 | 0,259 | 0,298 | 1 |
| Ddit4     | 0,134943 | 0,072971 | 0,469 | 0,447 | 1 |
| Uqcr10    | 0,134957 | -0,02643 | 0,954 | 0,971 | 1 |
| Mfap1a    | 0,135064 | -0,03347 | 0,472 | 0,519 | 1 |
| Lrig2     | 0,135073 | -0,02582 | 0,29  | 0,33  | 1 |
| Cmb1      | 0,135148 | 0,026648 | 0,181 | 0,151 | 1 |
| Amigo1    | 0,135332 | -0,02286 | 0,101 | 0,125 | 1 |
| Ywhaq     | 0,135444 | -0,02475 | 0,999 | 1     | 1 |
| Gm28836   | 0,135505 | -0,00983 | 0,012 | 0,021 | 1 |
| Ccdc142os | 0,135505 | -0,00983 | 0,012 | 0,021 | 1 |
| Gm29642   | 0,135574 | -0,01045 | 0,012 | 0,021 | 1 |
| Opa1      | 0,135655 | -0,04083 | 0,579 | 0,62  | 1 |
| Dgkd      | 0,13568  | -0,03957 | 0,34  | 0,377 | 1 |

|          |          |          |       |       |   |
|----------|----------|----------|-------|-------|---|
| Mtch1    | 0,135768 | 0,042819 | 0,972 | 0,958 | 1 |
| Zbed5    | 0,135817 | 0,024768 | 0,067 | 0,049 | 1 |
| Myadm    | 0,135903 | -0,03425 | 0,108 | 0,132 | 1 |
| Coro2b   | 0,136206 | 0,041286 | 0,459 | 0,429 | 1 |
| Fam177a  | 0,136233 | -0,04427 | 0,222 | 0,254 | 1 |
| Tfdp1    | 0,136277 | 0,027761 | 0,196 | 0,166 | 1 |
| Unc119   | 0,136292 | -0,01698 | 0,042 | 0,059 | 1 |
| Exoc7    | 0,1363   | -0,04459 | 0,455 | 0,483 | 1 |
| Dnm1l    | 0,136379 | 0,064002 | 0,535 | 0,524 | 1 |
| Cops7a   | 0,136403 | -0,03392 | 0,38  | 0,418 | 1 |
| Stox2    | 0,136469 | -0,04504 | 0,855 | 0,862 | 1 |
| Slc9a3r2 | 0,136494 | 0,034436 | 0,321 | 0,285 | 1 |
| Klhl22   | 0,136516 | -0,02219 | 0,138 | 0,166 | 1 |
| Zfp830   | 0,136527 | -0,02119 | 0,269 | 0,307 | 1 |
| Mgat1    | 0,136687 | -0,03539 | 0,272 | 0,306 | 1 |
| Gm9008   | 0,136731 | -0,00963 | 0,005 | 0,011 | 1 |
| Apobr    | 0,136955 | -0,01187 | 0,021 | 0,033 | 1 |
| Klf3     | 0,137076 | 0,057335 | 0,598 | 0,566 | 1 |
| Amn1     | 0,137118 | -0,0201  | 0,404 | 0,452 | 1 |
| Stpg1    | 0,137213 | -0,00803 | 0,005 | 0,011 | 1 |
| Gm37170  | 0,137215 | -0,00928 | 0,005 | 0,011 | 1 |
| Cnrip1   | 0,137462 | -0,00868 | 0,204 | 0,241 | 1 |
| Mrto4    | 0,137573 | -0,03695 | 0,478 | 0,506 | 1 |
| Cpq      | 0,137609 | -0,04008 | 0,08  | 0,101 | 1 |
| Anxa7    | 0,137636 | 0,038303 | 0,17  | 0,143 | 1 |
| Etnppl   | 0,137697 | -0,00642 | 0,005 | 0,011 | 1 |
| Uchl1os  | 0,137697 | -0,00642 | 0,005 | 0,011 | 1 |
| Anxa3    | 0,137697 | -0,00642 | 0,005 | 0,011 | 1 |
| Gm21119  | 0,137697 | -0,00642 | 0,005 | 0,011 | 1 |
| Psd      | 0,137697 | -0,00642 | 0,005 | 0,011 | 1 |
| Sema4d   | 0,137856 | 0,057035 | 0,978 | 0,976 | 1 |
| Cit      | 0,137893 | -0,00705 | 0,005 | 0,011 | 1 |
| Camkk1   | 0,137893 | -0,00705 | 0,005 | 0,011 | 1 |
| Gmpr     | 0,137893 | -0,00705 | 0,005 | 0,011 | 1 |
| Cdk5rap1 | 0,137989 | -0,02277 | 0,061 | 0,08  | 1 |
| Rbfox1   | 0,13799  | -0,00608 | 0,005 | 0,011 | 1 |
| Anapc4   | 0,138124 | 0,044908 | 0,325 | 0,294 | 1 |
| Usp7     | 0,138261 | -0,0209  | 0,507 | 0,548 | 1 |
| Ndufaf6  | 0,1383   | 0,025673 | 0,057 | 0,041 | 1 |
| Tha1     | 0,138351 | -0,01315 | 0,049 | 0,067 | 1 |
| Bex1     | 0,138378 | -0,00447 | 0,005 | 0,011 | 1 |
| Npl      | 0,138378 | -0,00545 | 0,005 | 0,011 | 1 |
| Rslcan18 | 0,138378 | -0,00545 | 0,005 | 0,011 | 1 |
| Msh5     | 0,138378 | -0,00545 | 0,005 | 0,011 | 1 |
| Mtpn     | 0,138438 | -0,01511 | 0,386 | 0,431 | 1 |
| Cdkn1b   | 0,138447 | -0,02904 | 0,687 | 0,712 | 1 |
| Coa7     | 0,138479 | -0,02585 | 0,108 | 0,132 | 1 |
| Pigl     | 0,138653 | -0,01664 | 0,083 | 0,106 | 1 |
| Cenpf    | 0,138957 | -0,00532 | 0,042 | 0,059 | 1 |
| Gm6710   | 0,138979 | -0,02064 | 0,114 | 0,14  | 1 |
| Spata24  | 0,13898  | -0,0263  | 0,194 | 0,226 | 1 |
| E2f4     | 0,138983 | -0,00915 | 0,172 | 0,205 | 1 |

|           |          |          |       |       |   |
|-----------|----------|----------|-------|-------|---|
| Ccdc127   | 0,139001 | -0,04502 | 0,434 | 0,462 | 1 |
| Coq6      | 0,13902  | -0,01935 | 0,18  | 0,211 | 1 |
| Ffar1     | 0,139062 | -0,00447 | 0,005 | 0,011 | 1 |
| Tmem117   | 0,139111 | 0,04476  | 0,485 | 0,455 | 1 |
| Mtap      | 0,139244 | 0,025673 | 0,057 | 0,041 | 1 |
| Prrc2b    | 0,139528 | -0,03067 | 0,649 | 0,691 | 1 |
| 3110082J2 | 0,139615 | -0,01707 | 0,071 | 0,091 | 1 |
| Stxbp1    | 0,139662 | -0,03642 | 0,257 | 0,289 | 1 |
| 9130023H  | 0,139678 | -0,0206  | 0,058 | 0,076 | 1 |
| Mbd5      | 0,139753 | -0,02509 | 0,222 | 0,255 | 1 |
| Tnxb      | 0,139844 | 0,024545 | 0,027 | 0,016 | 1 |
| Dnajb2    | 0,139951 | 0,027366 | 0,997 | 0,997 | 1 |
| Rpl13     | 0,139968 | 0,042147 | 0,998 | 1     | 1 |
| Fam35a    | 0,140027 | -0,02274 | 0,1   | 0,124 | 1 |
| Usp14     | 0,140233 | -0,02702 | 0,411 | 0,454 | 1 |
| Kcnq1ot1  | 0,140288 | 0,116536 | 0,776 | 0,741 | 1 |
| Sfxn3     | 0,140291 | 0,027564 | 0,116 | 0,093 | 1 |
| Napg      | 0,140385 | -0,03819 | 0,46  | 0,498 | 1 |
| Rsb1l     | 0,140434 | -0,03703 | 0,485 | 0,53  | 1 |
| Prkd3     | 0,140504 | -0,03296 | 0,698 | 0,722 | 1 |
| Hectd1    | 0,140564 | -0,02563 | 0,792 | 0,795 | 1 |
| Avpi1     | 0,140578 | -0,00825 | 0,046 | 0,063 | 1 |
| Polr3f    | 0,140652 | -0,01561 | 0,209 | 0,242 | 1 |
| Pbdc1     | 0,140831 | -0,01211 | 0,33  | 0,376 | 1 |
| Gbp9      | 0,14088  | -0,01577 | 0,002 | 0,007 | 1 |
| Pycr2     | 0,140986 | -0,03662 | 0,588 | 0,6   | 1 |
| Rnps1     | 0,141016 | -0,03345 | 0,399 | 0,439 | 1 |
| Clgn      | 0,141038 | -0,0533  | 0,135 | 0,161 | 1 |
| Zfc3h1    | 0,141067 | -0,02717 | 0,353 | 0,389 | 1 |
| Banf1     | 0,141103 | -0,0467  | 0,48  | 0,512 | 1 |
| Kif6      | 0,141155 | 0,034786 | 0,242 | 0,211 | 1 |
| Gm26648   | 0,141159 | -0,00775 | 0,002 | 0,007 | 1 |
| Slc22a21  | 0,141159 | -0,00775 | 0,002 | 0,007 | 1 |
| Atp7b     | 0,141159 | -0,01417 | 0,002 | 0,007 | 1 |
| Acot2     | 0,141163 | 0,068536 | 0,447 | 0,428 | 1 |
| Gpatch1   | 0,141225 | -0,01346 | 0,206 | 0,242 | 1 |
| Gm12925   | 0,141246 | 0,009112 | 0,007 | 0,002 | 1 |
| Slc16a4   | 0,141246 | 0,008141 | 0,007 | 0,002 | 1 |
| Tm6sf2    | 0,141246 | 0,008141 | 0,007 | 0,002 | 1 |
| Cfap97    | 0,14127  | -0,01816 | 0,237 | 0,275 | 1 |
| Desi2     | 0,141342 | 0,053082 | 0,282 | 0,254 | 1 |
| Ica1l     | 0,141367 | 0,006195 | 0,007 | 0,002 | 1 |
| Sec16b    | 0,141367 | 0,006195 | 0,007 | 0,002 | 1 |
| Gm15728   | 0,141367 | 0,006195 | 0,007 | 0,002 | 1 |
| Gm19265   | 0,141367 | 0,006195 | 0,007 | 0,002 | 1 |
| 1810028FC | 0,141367 | 0,006195 | 0,007 | 0,002 | 1 |
| Clec3b    | 0,141367 | 0,006195 | 0,007 | 0,002 | 1 |
| Gm47167   | 0,141367 | 0,006195 | 0,007 | 0,002 | 1 |
| Gm15966   | 0,141367 | 0,006195 | 0,007 | 0,002 | 1 |
| Gm31718   | 0,141438 | -0,00614 | 0,002 | 0,007 | 1 |
| Gm47271   | 0,141438 | -0,00614 | 0,002 | 0,007 | 1 |
| Efnb2     | 0,141438 | -0,00775 | 0,002 | 0,007 | 1 |

|           |          |          |       |       |   |
|-----------|----------|----------|-------|-------|---|
| 181005812 | 0,141463 | 0,05624  | 0,758 | 0,746 | 1 |
| Map3k6    | 0,141487 | 0,005221 | 0,007 | 0,002 | 1 |
| Cers3     | 0,141487 | 0,005221 | 0,007 | 0,002 | 1 |
| Igf1      | 0,141487 | 0,005221 | 0,007 | 0,002 | 1 |
| Hist1h2bb | 0,141487 | 0,005221 | 0,007 | 0,002 | 1 |
| Ahrr      | 0,141487 | 0,005221 | 0,007 | 0,002 | 1 |
| Ppp6r3    | 0,141492 | -0,04075 | 0,507 | 0,54  | 1 |
| Arfip1    | 0,141497 | -0,04679 | 0,327 | 0,356 | 1 |
| Rint1     | 0,141518 | -0,02623 | 0,36  | 0,402 | 1 |
| Epha5     | 0,141614 | -0,01333 | 0,038 | 0,054 | 1 |
| Chst1     | 0,141717 | -0,00452 | 0,002 | 0,007 | 1 |
| Gm14393   | 0,141717 | -0,00452 | 0,002 | 0,007 | 1 |
| Mxra8     | 0,141717 | -0,00452 | 0,002 | 0,007 | 1 |
| Gm45187   | 0,141717 | -0,00452 | 0,002 | 0,007 | 1 |
| Olfr678   | 0,141717 | -0,00452 | 0,002 | 0,007 | 1 |
| Amh       | 0,141717 | -0,00452 | 0,002 | 0,007 | 1 |
| Gm44956   | 0,141717 | -0,00452 | 0,002 | 0,007 | 1 |
| Adprhl1   | 0,141717 | -0,00452 | 0,002 | 0,007 | 1 |
| Pdgfrl    | 0,141717 | -0,00452 | 0,002 | 0,007 | 1 |
| Olfr731   | 0,141717 | -0,00452 | 0,002 | 0,007 | 1 |
| Psemb11   | 0,141717 | -0,00452 | 0,002 | 0,007 | 1 |
| Piwil2    | 0,141717 | -0,00452 | 0,002 | 0,007 | 1 |
| Tex12     | 0,141717 | -0,00452 | 0,002 | 0,007 | 1 |
| Proca1    | 0,141717 | -0,00452 | 0,002 | 0,007 | 1 |
| Serpib9   | 0,141717 | -0,00452 | 0,002 | 0,007 | 1 |
| Dbn1      | 0,141717 | -0,00452 | 0,002 | 0,007 | 1 |
| Zdhhc22   | 0,141717 | -0,00452 | 0,002 | 0,007 | 1 |
| Cd86      | 0,141717 | -0,00452 | 0,002 | 0,007 | 1 |
| Ip6k3     | 0,141717 | -0,00452 | 0,002 | 0,007 | 1 |
| Spdef     | 0,141717 | -0,00452 | 0,002 | 0,007 | 1 |
| Pcdha9    | 0,141717 | -0,00452 | 0,002 | 0,007 | 1 |
| Best1     | 0,141717 | -0,00452 | 0,002 | 0,007 | 1 |
| Rnmt      | 0,14184  | 0,05211  | 0,317 | 0,285 | 1 |
| Tcea1     | 0,141848 | -0,03113 | 0,82  | 0,828 | 1 |
| Mgat4b    | 0,141867 | 0,039962 | 0,326 | 0,291 | 1 |
| Gm16702   | 0,141877 | -0,02289 | 0,027 | 0,041 | 1 |
| Got2      | 0,141946 | -0,04318 | 0,641 | 0,673 | 1 |
| Cep19     | 0,14197  | -0,03128 | 0,066 | 0,085 | 1 |
| Col15a1   | 0,141998 | -0,00516 | 0,002 | 0,007 | 1 |
| Ift81     | 0,142071 | -0,02953 | 0,138 | 0,164 | 1 |
| Mrps28    | 0,142076 | -0,03062 | 0,33  | 0,367 | 1 |
| Commd6    | 0,142113 | -0,02367 | 0,716 | 0,758 | 1 |
| Trpc4ap   | 0,14215  | -0,02481 | 0,835 | 0,842 | 1 |
| Nufip2    | 0,142172 | 0,073072 | 0,677 | 0,668 | 1 |
| Ndufa2    | 0,142193 | -0,02869 | 0,969 | 0,972 | 1 |
| Ercc6l    | 0,142217 | 0,004573 | 0,007 | 0,002 | 1 |
| Pus10     | 0,142245 | -0,02396 | 0,099 | 0,122 | 1 |
| Gm40513   | 0,142278 | -0,00354 | 0,002 | 0,007 | 1 |
| Gm28370   | 0,142278 | -0,00354 | 0,002 | 0,007 | 1 |
| Ipp       | 0,142298 | -0,0275  | 0,125 | 0,15  | 1 |
| Tpmt      | 0,142306 | 0,047156 | 0,182 | 0,156 | 1 |
| Slc20a1   | 0,14235  | 0,040272 | 0,169 | 0,143 | 1 |

|           |          |          |       |       |   |
|-----------|----------|----------|-------|-------|---|
| Tbp       | 0,142361 | -0,03395 | 0,16  | 0,187 | 1 |
| Arpp21    | 0,14252  | -0,01061 | 0,004 | 0,01  | 1 |
| Rab2b     | 0,142539 | -0,02803 | 0,404 | 0,452 | 1 |
| Tmem230   | 0,142556 | -0,03227 | 0,396 | 0,439 | 1 |
| Vezf1     | 0,142646 | -0,01712 | 0,748 | 0,797 | 1 |
| Psmc3     | 0,142653 | 0,042037 | 0,935 | 0,928 | 1 |
| Rgs3      | 0,142674 | 0,064475 | 0,75  | 0,759 | 1 |
| Sumf2     | 0,142775 | -0,02803 | 0,149 | 0,176 | 1 |
| Flywch2   | 0,142851 | 0,029633 | 0,121 | 0,098 | 1 |
| Inpp1     | 0,142881 | 0,035724 | 0,134 | 0,111 | 1 |
| Gm14286   | 0,142956 | -0,0074  | 0,004 | 0,01  | 1 |
| 1700026J1 | 0,142956 | -0,0074  | 0,004 | 0,01  | 1 |
| Mrap      | 0,142956 | -0,0074  | 0,004 | 0,01  | 1 |
| Dbx2      | 0,143066 | -0,00963 | 0,004 | 0,01  | 1 |
| Dtx3l     | 0,143106 | -0,01433 | 0,031 | 0,046 | 1 |
| Eif4enif1 | 0,143117 | -0,03679 | 0,292 | 0,325 | 1 |
| Kirrel3os | 0,143176 | -0,00803 | 0,004 | 0,01  | 1 |
| Sox5      | 0,143176 | -0,01026 | 0,004 | 0,01  | 1 |
| Usp4      | 0,143177 | -0,03895 | 0,389 | 0,423 | 1 |
| Fam84b    | 0,143181 | -0,02101 | 0,016 | 0,026 | 1 |
| Zbtb37    | 0,14327  | -0,03723 | 0,299 | 0,332 | 1 |
| Gm16240   | 0,143367 | 0,025767 | 0,031 | 0,02  | 1 |
| Opn3      | 0,143393 | -0,00579 | 0,004 | 0,01  | 1 |
| Gm17096   | 0,143393 | -0,00579 | 0,004 | 0,01  | 1 |
| Scml2     | 0,143393 | -0,00579 | 0,004 | 0,01  | 1 |
| Plch2     | 0,143393 | -0,00579 | 0,004 | 0,01  | 1 |
| Ppp1r1a   | 0,143393 | -0,00579 | 0,004 | 0,01  | 1 |
| Ggta1     | 0,143437 | -0,01874 | 0,034 | 0,049 | 1 |
| Bicd2     | 0,143479 | -0,04179 | 0,714 | 0,746 | 1 |
| Ttc39c    | 0,143516 | 0,041514 | 0,151 | 0,127 | 1 |
| Matn4     | 0,143589 | 0,033602 | 0,536 | 0,501 | 1 |
| Zfp827    | 0,143606 | 0,040109 | 0,159 | 0,133 | 1 |
| Fcgrt     | 0,143613 | -0,00642 | 0,004 | 0,01  | 1 |
| AU020206  | 0,143613 | -0,00642 | 0,004 | 0,01  | 1 |
| Rnf214    | 0,143616 | -0,03308 | 0,337 | 0,374 | 1 |
| Slc25a24  | 0,143714 | 0,016141 | 0,017 | 0,008 | 1 |
| Brd1      | 0,143724 | 0,052094 | 0,617 | 0,572 | 1 |
| Pole4     | 0,1438   | -0,04478 | 0,481 | 0,509 | 1 |
| Fam135b   | 0,143826 | -0,01849 | 0,02  | 0,031 | 1 |
| Plekho1   | 0,143986 | 0,013839 | 0,027 | 0,016 | 1 |
| Slc10a3   | 0,144021 | -0,0149  | 0,027 | 0,041 | 1 |
| Gm37850   | 0,144052 | -0,00384 | 0,004 | 0,01  | 1 |
| Gm38336   | 0,144052 | -0,00481 | 0,004 | 0,01  | 1 |
| Cdiptos   | 0,144052 | -0,00481 | 0,004 | 0,01  | 1 |
| Muc4      | 0,144052 | -0,00481 | 0,004 | 0,01  | 1 |
| Rad51     | 0,14406  | -0,01933 | 0,024 | 0,036 | 1 |
| Rbl2      | 0,144133 | -0,03266 | 0,506 | 0,53  | 1 |
| Ppp1r16b  | 0,144152 | 0,065437 | 0,982 | 0,985 | 1 |
| Aph1a     | 0,144228 | -0,02723 | 0,701 | 0,737 | 1 |
| Sept10    | 0,144299 | 0,032156 | 0,267 | 0,234 | 1 |
| Prkaa2    | 0,14436  | -0,02652 | 0,103 | 0,127 | 1 |
| Ccdc73    | 0,144363 | -0,01479 | 0,071 | 0,091 | 1 |



|           |          |          |       |       |   |
|-----------|----------|----------|-------|-------|---|
| Tyw5      | 0,144371 | -0,02144 | 0,19  | 0,221 | 1 |
| 1700018LC | 0,144457 | 0,016141 | 0,017 | 0,008 | 1 |
| Smarcc1   | 0,144474 | -0,04221 | 0,517 | 0,546 | 1 |
| Jup       | 0,144524 | -0,02503 | 0,854 | 0,857 | 1 |
| Sdc2      | 0,144551 | -0,00596 | 0,035 | 0,05  | 1 |
| Vamp7     | 0,144581 | -0,03262 | 0,48  | 0,527 | 1 |
| Alg13     | 0,144583 | -0,02348 | 0,132 | 0,158 | 1 |
| Mdm2      | 0,144671 | 0,057871 | 0,616 | 0,593 | 1 |
| Mzb1      | 0,144714 | -0,00384 | 0,004 | 0,01  | 1 |
| Lmbr1     | 0,144863 | -0,02946 | 0,215 | 0,244 | 1 |
| Slain1    | 0,144914 | 0,024676 | 0,999 | 1     | 1 |
| Tpm3      | 0,144932 | 0,052899 | 0,871 | 0,865 | 1 |
| Rpl12     | 0,144938 | 0,036259 | 0,946 | 0,928 | 1 |
| Ribc1     | 0,144959 | -0,01576 | 0,027 | 0,041 | 1 |
| Ttc38     | 0,14497  | -0,02291 | 0,112 | 0,137 | 1 |
| Cntn4     | 0,14497  | -0,01363 | 0,058 | 0,076 | 1 |
| Hlf       | 0,144988 | -0,01033 | 0,031 | 0,046 | 1 |
| Foxm1     | 0,145029 | -0,01353 | 0,016 | 0,026 | 1 |
| Smc5      | 0,145096 | -0,03789 | 0,389 | 0,421 | 1 |
| Cct5      | 0,145124 | -0,02978 | 0,854 | 0,872 | 1 |
| Gm47061   | 0,145159 | -0,00838 | 0,003 | 0,008 | 1 |
| Cpne8     | 0,145159 | -0,00838 | 0,003 | 0,008 | 1 |
| Gm7008    | 0,145202 | 0,01134  | 0,017 | 0,008 | 1 |
| Selenoi   | 0,145225 | -0,03952 | 0,352 | 0,389 | 1 |
| Spire1    | 0,145299 | -0,00215 | 0,457 | 0,524 | 1 |
| Mapk7     | 0,145319 | -0,01995 | 0,19  | 0,223 | 1 |
| Cxcl14    | 0,145459 | -0,02683 | 0,027 | 0,041 | 1 |
| Epha7     | 0,14553  | -0,00677 | 0,003 | 0,008 | 1 |
| Gm44210   | 0,14553  | -0,00677 | 0,003 | 0,008 | 1 |
| Gm17344   | 0,14553  | -0,00677 | 0,003 | 0,008 | 1 |
| Hoxb9     | 0,14553  | -0,00677 | 0,003 | 0,008 | 1 |
| Hoxc9     | 0,14553  | -0,00677 | 0,003 | 0,008 | 1 |
| Alpk2     | 0,145575 | 0,014223 | 0,017 | 0,008 | 1 |
| Mcrip1    | 0,145702 | -0,02153 | 0,837 | 0,865 | 1 |
| Elf5      | 0,145901 | -0,00516 | 0,003 | 0,008 | 1 |
| Gm31305   | 0,145901 | -0,00516 | 0,003 | 0,008 | 1 |
| Casq2     | 0,145901 | -0,00516 | 0,003 | 0,008 | 1 |
| Gm11831   | 0,145901 | -0,00516 | 0,003 | 0,008 | 1 |
| Laptm5    | 0,145901 | -0,00516 | 0,003 | 0,008 | 1 |
| A2m       | 0,145901 | -0,00516 | 0,003 | 0,008 | 1 |
| Olfr30    | 0,145901 | -0,00516 | 0,003 | 0,008 | 1 |
| Abhd15    | 0,145901 | -0,00516 | 0,003 | 0,008 | 1 |
| Dtnbos    | 0,145901 | -0,00516 | 0,003 | 0,008 | 1 |
| AC163633. | 0,145901 | -0,00516 | 0,003 | 0,008 | 1 |
| Gm35558.  | 0,145901 | -0,00516 | 0,003 | 0,008 | 1 |
| Capn11    | 0,145901 | -0,00516 | 0,003 | 0,008 | 1 |
| Rpl7a-ps5 | 0,145901 | -0,00516 | 0,003 | 0,008 | 1 |
| Gm26823   | 0,145901 | -0,00516 | 0,003 | 0,008 | 1 |
| Gm17669   | 0,145901 | -0,00516 | 0,003 | 0,008 | 1 |
| Mink1     | 0,146191 | -0,00578 | 0,69  | 0,764 | 1 |
| Atp6v1d   | 0,1462   | -0,03897 | 0,633 | 0,683 | 1 |
| Atxn7l2   | 0,146323 | -0,01214 | 0,055 | 0,073 | 1 |

|           |          |          |       |       |   |
|-----------|----------|----------|-------|-------|---|
| Gm19345   | 0,146523 | -0,0032  | 0,003 | 0,008 | 1 |
| Phf19     | 0,146523 | -0,00418 | 0,003 | 0,008 | 1 |
| 4930548H  | 0,146523 | -0,00418 | 0,003 | 0,008 | 1 |
| 1700124L1 | 0,146523 | -0,00418 | 0,003 | 0,008 | 1 |
| Gngt2     | 0,146523 | -0,00418 | 0,003 | 0,008 | 1 |
| Ift122    | 0,146548 | -0,03346 | 0,157 | 0,184 | 1 |
| Tspo      | 0,14657  | 0,008965 | 0,126 | 0,101 | 1 |
| B230317F2 | 0,146655 | -0,01813 | 0,02  | 0,031 | 1 |
| Fbxw9     | 0,146705 | 0,032877 | 0,172 | 0,145 | 1 |
| Pvt1      | 0,146714 | -0,02142 | 0,185 | 0,216 | 1 |
| Tnks2     | 0,146742 | -0,02996 | 0,818 | 0,842 | 1 |
| Dgcr6     | 0,146743 | -0,02051 | 0,378 | 0,423 | 1 |
| Rrs1      | 0,146798 | -0,02584 | 0,48  | 0,533 | 1 |
| Hibadh    | 0,146841 | -0,03163 | 0,642 | 0,673 | 1 |
| Mtfr1     | 0,146841 | -0,01914 | 0,164 | 0,193 | 1 |
| Prnt1     | 0,146861 | -0,03362 | 0,617 | 0,642 | 1 |
| Hacd2     | 0,14698  | -0,0429  | 0,418 | 0,459 | 1 |
| Trnt1     | 0,146997 | -0,0486  | 0,556 | 0,572 | 1 |
| Pik3c2a   | 0,147012 | -0,03316 | 0,545 | 0,592 | 1 |
| Trim12c   | 0,14705  | -0,02307 | 0,011 | 0,02  | 1 |
| Tmem209   | 0,147053 | -0,01758 | 0,275 | 0,312 | 1 |
| Pcdhb4    | 0,147088 | 0,014183 | 0,017 | 0,008 | 1 |
| Sema6c    | 0,147093 | -0,00879 | 0,016 | 0,026 | 1 |
| Sun1      | 0,147102 | 0,069082 | 0,381 | 0,363 | 1 |
| Rassf1    | 0,147217 | 0,047413 | 0,368 | 0,335 | 1 |
| Mea1      | 0,147332 | -0,03712 | 0,386 | 0,423 | 1 |
| St8sia5   | 0,147445 | 0,024711 | 0,297 | 0,262 | 1 |
| Frmd4b    | 0,147475 | -0,02159 | 0,879 | 0,881 | 1 |
| Drc3      | 0,147487 | -0,00859 | 0,011 | 0,02  | 1 |
| 1810021B  | 0,147529 | 0,01224  | 0,029 | 0,018 | 1 |
| Scn1b     | 0,147529 | 0,035481 | 0,17  | 0,141 | 1 |
| Apmap     | 0,147563 | 0,020021 | 0,297 | 0,26  | 1 |
| Spopl     | 0,147611 | -0,02493 | 0,252 | 0,288 | 1 |
| Pbx1      | 0,147623 | -0,01297 | 0,298 | 0,34  | 1 |
| Cebpz     | 0,147723 | 0,04462  | 0,296 | 0,27  | 1 |
| Csrnp1    | 0,147726 | 0,103873 | 0,168 | 0,143 | 1 |
| Spry1     | 0,148066 | -0,02847 | 0,249 | 0,283 | 1 |
| Bmp2k     | 0,148115 | -0,03272 | 0,906 | 0,911 | 1 |
| Gdap10    | 0,14813  | 0,006138 | 0,144 | 0,176 | 1 |
| A130010J1 | 0,148141 | 0,01484  | 0,085 | 0,065 | 1 |
| Slc39a6   | 0,148226 | -0,04396 | 0,25  | 0,278 | 1 |
| Nifk      | 0,148272 | -0,03584 | 0,254 | 0,283 | 1 |
| Pclo      | 0,148303 | -0,03698 | 0,297 | 0,328 | 1 |
| Bhlhe40   | 0,14836  | 0,108253 | 0,246 | 0,221 | 1 |
| Letm2     | 0,148432 | -0,03661 | 0,303 | 0,332 | 1 |
| Tspan15   | 0,148531 | 0,042503 | 0,957 | 0,951 | 1 |
| Snx25     | 0,148828 | -0,01418 | 0,041 | 0,057 | 1 |
| Copb1     | 0,148943 | 0,042705 | 0,586 | 0,554 | 1 |
| Trim26    | 0,148951 | -0,03092 | 0,317 | 0,353 | 1 |
| Ak1       | 0,148994 | -0,03571 | 0,234 | 0,265 | 1 |
| Acp1      | 0,149123 | 0,030722 | 0,622 | 0,595 | 1 |
| Tusc3     | 0,149194 | -0,0431  | 0,177 | 0,202 | 1 |

|           |          |          |       |       |   |
|-----------|----------|----------|-------|-------|---|
| Ube2v1    | 0,149204 | 0,017128 | 0,049 | 0,034 | 1 |
| Ubqln2    | 0,149339 | -0,02807 | 0,734 | 0,766 | 1 |
| Sltm      | 0,14936  | -0,02576 | 0,781 | 0,816 | 1 |
| Gm29773   | 0,149442 | 0,005254 | 0,016 | 0,026 | 1 |
| Ccdc71    | 0,149527 | 0,026796 | 0,124 | 0,101 | 1 |
| Lifr      | 0,14954  | -0,04383 | 0,509 | 0,551 | 1 |
| Eef1a1    | 0,149612 | -0,01952 | 0,999 | 1     | 1 |
| Zfp65     | 0,149892 | -0,03426 | 0,122 | 0,145 | 1 |
| Zcchc17   | 0,149919 | -0,01803 | 0,698 | 0,766 | 1 |
| 1700066B: | 0,150097 | -0,01813 | 0,02  | 0,031 | 1 |
| Camk1     | 0,150143 | -0,04591 | 0,386 | 0,415 | 1 |
| Smarcb1   | 0,150193 | -0,02214 | 0,624 | 0,654 | 1 |
| Smug1     | 0,150234 | -0,02155 | 0,129 | 0,154 | 1 |
| Gm30122   | 0,150261 | 0,01841  | 0,043 | 0,029 | 1 |
| Aqp4      | 0,150285 | -0,01144 | 0,024 | 0,036 | 1 |
| Matn2     | 0,150328 | -0,03036 | 0,189 | 0,22  | 1 |
| Zfyve27   | 0,150417 | -0,03706 | 0,41  | 0,437 | 1 |
| 4931406P: | 0,150439 | -0,03932 | 0,806 | 0,813 | 1 |
| Cyb5d1    | 0,150477 | -0,00995 | 0,024 | 0,036 | 1 |
| Unc5b     | 0,150614 | -0,04077 | 0,955 | 0,958 | 1 |
| Lig1      | 0,150661 | 0,03507  | 0,269 | 0,237 | 1 |
| Brd7      | 0,150719 | -0,02953 | 0,659 | 0,683 | 1 |
| Morc2a    | 0,150864 | -0,01884 | 0,176 | 0,207 | 1 |
| Gm17690   | 0,150883 | 0,011904 | 0,031 | 0,02  | 1 |
| Olfr889   | 0,150957 | 0,0043   | 0,027 | 0,016 | 1 |
| Spice1    | 0,151136 | -0,02829 | 0,196 | 0,226 | 1 |
| Zfp592    | 0,151196 | 0,033815 | 0,192 | 0,164 | 1 |
| 1110046JC | 0,15133  | -0,01657 | 0,216 | 0,249 | 1 |
| Prdx4     | 0,151417 | 0,056127 | 0,447 | 0,416 | 1 |
| Nkx6-2    | 0,151587 | 0,03797  | 0,988 | 0,985 | 1 |
| Serbp1    | 0,151644 | -0,0236  | 0,967 | 0,972 | 1 |
| Rangrf    | 0,151942 | -0,02231 | 0,136 | 0,163 | 1 |
| Plcb4     | 0,152008 | 0,050526 | 0,17  | 0,145 | 1 |
| Sumo3     | 0,152054 | 0,057478 | 0,542 | 0,527 | 1 |
| Zc2hc1a   | 0,152099 | -0,02391 | 0,188 | 0,22  | 1 |
| AC158554. | 0,152381 | 0,00962  | 0,045 | 0,031 | 1 |
| Mief2     | 0,152389 | -0,02396 | 0,107 | 0,13  | 1 |
| Mcm3      | 0,152492 | 0,019116 | 0,105 | 0,083 | 1 |
| Tnpo2     | 0,152519 | -0,02335 | 0,29  | 0,327 | 1 |
| Sag       | 0,152532 | 0,019415 | 0,082 | 0,063 | 1 |
| Scrn2     | 0,152635 | -0,01143 | 0,092 | 0,115 | 1 |
| Eif5a2    | 0,152661 | -0,03296 | 0,229 | 0,259 | 1 |
| Hexdc     | 0,152663 | 0,030362 | 0,184 | 0,158 | 1 |
| Ammecr1l  | 0,152732 | 0,043975 | 0,267 | 0,239 | 1 |
| Dhrs13    | 0,152743 | -0,01757 | 0,047 | 0,063 | 1 |
| Mfge8     | 0,152854 | 0,045668 | 0,44  | 0,398 | 1 |
| Vps8      | 0,152924 | -0,02627 | 0,401 | 0,449 | 1 |
| 2700046G: | 0,152996 | -0,0215  | 0,116 | 0,14  | 1 |
| Dexi      | 0,153174 | -0,03819 | 0,226 | 0,255 | 1 |
| Syde2     | 0,153195 | -0,01541 | 0,079 | 0,101 | 1 |
| Slc25a5   | 0,153209 | -0,03764 | 0,761 | 0,779 | 1 |
| Rbfa      | 0,153245 | -0,01889 | 0,265 | 0,301 | 1 |

|           |          |          |       |       |   |
|-----------|----------|----------|-------|-------|---|
| Pprc1     | 0,153307 | 0,027033 | 0,134 | 0,111 | 1 |
| Ptpdc1    | 0,153389 | -0,05203 | 0,494 | 0,512 | 1 |
| Dhodh     | 0,153423 | -0,02849 | 0,166 | 0,193 | 1 |
| Mboat7    | 0,153453 | -0,01616 | 0,234 | 0,27  | 1 |
| Paqr3     | 0,153477 | -0,01273 | 0,054 | 0,072 | 1 |
| Smim12    | 0,153492 | -0,03757 | 0,345 | 0,379 | 1 |
| Ppp1r21   | 0,153596 | -0,02946 | 0,697 | 0,737 | 1 |
| F8a       | 0,153807 | -0,03382 | 0,183 | 0,21  | 1 |
| Rab11a    | 0,153832 | -0,0262  | 0,616 | 0,655 | 1 |
| Stxbp4    | 0,15384  | 0,032454 | 0,12  | 0,098 | 1 |
| Gm15417   | 0,153852 | 0,062537 | 0,275 | 0,249 | 1 |
| Rbms2     | 0,153875 | -0,02454 | 0,069 | 0,088 | 1 |
| Pdrg1     | 0,15389  | -0,02807 | 0,407 | 0,447 | 1 |
| Cdkl3     | 0,153993 | -0,02851 | 0,113 | 0,137 | 1 |
| Wdr5      | 0,154029 | -0,02178 | 0,13  | 0,154 | 1 |
| Ftx       | 0,154079 | -0,02055 | 0,087 | 0,109 | 1 |
| Mast3     | 0,154483 | 0,057585 | 0,827 | 0,821 | 1 |
| Gm38393   | 0,154707 | -0,019   | 0,087 | 0,109 | 1 |
| Cdk5      | 0,154782 | -0,02499 | 0,701 | 0,725 | 1 |
| Dgke      | 0,154817 | -0,01945 | 0,156 | 0,184 | 1 |
| Rab11fip5 | 0,154918 | 0,011236 | 0,035 | 0,023 | 1 |
| Mks1      | 0,155033 | -0,04134 | 0,24  | 0,268 | 1 |
| Myo1c     | 0,155059 | 0,017421 | 0,043 | 0,029 | 1 |
| Bc1       | 0,15506  | 0,01369  | 0,039 | 0,026 | 1 |
| Pou2f1    | 0,155161 | 0,059059 | 0,343 | 0,317 | 1 |
| Dtnbp1    | 0,155183 | -0,02526 | 0,222 | 0,254 | 1 |
| Cnih3     | 0,15521  | 0,020098 | 0,066 | 0,049 | 1 |
| Seh1l     | 0,155216 | -0,02233 | 0,253 | 0,289 | 1 |
| Tk1       | 0,155706 | 0,010713 | 0,012 | 0,005 | 1 |
| Ecm2      | 0,155706 | 0,010713 | 0,012 | 0,005 | 1 |
| Afap1l1   | 0,155774 | 0,060645 | 0,421 | 0,393 | 1 |
| Bsdc1     | 0,155807 | -0,05004 | 0,462 | 0,494 | 1 |
| Kcnh7     | 0,155923 | 0,011002 | 0,019 | 0,01  | 1 |
| Qars      | 0,155997 | -0,0237  | 0,335 | 0,374 | 1 |
| Ovgp1     | 0,156032 | 0,011236 | 0,035 | 0,023 | 1 |
| Oxnad1    | 0,156032 | -0,02564 | 0,163 | 0,19  | 1 |
| Hps5      | 0,156061 | -0,01395 | 0,214 | 0,247 | 1 |
| Tprkb     | 0,156107 | -0,04764 | 0,589 | 0,615 | 1 |
| Ckap2     | 0,156278 | 0,009747 | 0,012 | 0,005 | 1 |
| Pm20d1    | 0,156281 | 0,016796 | 0,012 | 0,005 | 1 |
| Fzd9      | 0,15633  | -0,01075 | 0,03  | 0,044 | 1 |
| 17000860l | 0,15633  | -0,01075 | 0,03  | 0,044 | 1 |
| Wdr91     | 0,15633  | -0,00986 | 0,458 | 0,506 | 1 |
| Alkbh2    | 0,156337 | 0,009983 | 0,035 | 0,023 | 1 |
| Mlh3      | 0,156391 | -0,02099 | 0,388 | 0,426 | 1 |
| Gm2a      | 0,156491 | 0,029829 | 0,598 | 0,559 | 1 |
| Sdf2l1    | 0,156526 | -0,04718 | 0,378 | 0,413 | 1 |
| Pnp2      | 0,156564 | 0,007811 | 0,012 | 0,005 | 1 |
| Net1      | 0,156564 | 0,007811 | 0,012 | 0,005 | 1 |
| Gm6169    | 0,156564 | 0,007811 | 0,012 | 0,005 | 1 |
| Nrxn3     | 0,156564 | 0,007811 | 0,012 | 0,005 | 1 |
| Tlr3      | 0,156575 | -0,01551 | 0,026 | 0,039 | 1 |

|           |          |          |       |       |   |
|-----------|----------|----------|-------|-------|---|
| Cxcr4     | 0,156591 | 0,008751 | 0,019 | 0,01  | 1 |
| Plekhg1   | 0,156621 | -0,01274 | 0,806 | 0,834 | 1 |
| 1810024B  | 0,156637 | -0,00689 | 0,097 | 0,12  | 1 |
| Gm13205   | 0,156851 | 0,006841 | 0,012 | 0,005 | 1 |
| Cyba      | 0,156851 | 0,006841 | 0,012 | 0,005 | 1 |
| Mrps2     | 0,156869 | -0,02324 | 0,119 | 0,143 | 1 |
| Prpsap1   | 0,156928 | 0,049276 | 0,667 | 0,641 | 1 |
| Gm12326   | 0,156965 | -0,02904 | 0,201 | 0,231 | 1 |
| 4930503L1 | 0,156966 | 0,0329   | 0,188 | 0,163 | 1 |
| Pcdhb13   | 0,157142 | 0,00813  | 0,012 | 0,005 | 1 |
| Rpl5      | 0,157251 | 0,036161 | 0,99  | 0,989 | 1 |
| Sgk1      | 0,157291 | 0,086603 | 0,534 | 0,507 | 1 |
| Phactr2   | 0,157474 | -0,04892 | 0,247 | 0,273 | 1 |
| Vps72     | 0,15753  | -0,02514 | 0,404 | 0,439 | 1 |
| Prelid3b  | 0,157832 | -0,03197 | 0,382 | 0,42  | 1 |
| Suz12     | 0,157893 | -0,02926 | 0,37  | 0,405 | 1 |
| Nabp1     | 0,157931 | 0,052323 | 0,103 | 0,083 | 1 |
| Rpl35     | 0,157994 | 0,04725  | 0,962 | 0,964 | 1 |
| Srek1     | 0,158144 | -0,03045 | 0,667 | 0,719 | 1 |
| Taf12     | 0,158715 | -0,0166  | 0,298 | 0,337 | 1 |
| Lrp4      | 0,158745 | -0,06487 | 0,209 | 0,236 | 1 |
| Mgst3     | 0,159072 | -0,04183 | 0,505 | 0,532 | 1 |
| Baz2b     | 0,159089 | -0,05814 | 0,805 | 0,82  | 1 |
| 2610044O  | 0,159135 | -0,02019 | 0,133 | 0,159 | 1 |
| Adgra1    | 0,15916  | -0,00635 | 0,03  | 0,044 | 1 |
| Them4     | 0,159162 | -0,01919 | 0,296 | 0,335 | 1 |
| Nipsnap3b | 0,159207 | 0,040616 | 0,555 | 0,517 | 1 |
| Kank1     | 0,159258 | -0,01703 | 0,01  | 0,018 | 1 |
| Arhgef28  | 0,159332 | -0,02729 | 0,515 | 0,553 | 1 |
| Zfand2b   | 0,159333 | 0,042991 | 0,32  | 0,288 | 1 |
| Smcr8     | 0,159355 | -0,02176 | 0,141 | 0,167 | 1 |
| Fbxw5     | 0,159358 | -0,0488  | 0,318 | 0,343 | 1 |
| Bbs2      | 0,159535 | -0,02207 | 0,141 | 0,167 | 1 |
| Drg2      | 0,159695 | -0,02873 | 0,414 | 0,452 | 1 |
| Cdc34     | 0,159742 | -0,02177 | 0,266 | 0,301 | 1 |
| Igf2r     | 0,159802 | -0,01586 | 0,199 | 0,231 | 1 |
| Smchd1    | 0,15982  | -0,01991 | 0,5   | 0,528 | 1 |
| Rock2     | 0,159884 | -0,00143 | 0,705 | 0,772 | 1 |
| Tbc1d23   | 0,159986 | -0,04335 | 0,437 | 0,475 | 1 |
| Map2      | 0,160098 | -0,04295 | 0,266 | 0,298 | 1 |
| Fam96b    | 0,160351 | -0,04057 | 0,701 | 0,709 | 1 |
| Psm3      | 0,160439 | -0,03142 | 0,894 | 0,901 | 1 |
| Snrpe     | 0,160624 | -0,03544 | 0,6   | 0,626 | 1 |
| Ccnd3     | 0,160711 | 0,037743 | 0,273 | 0,246 | 1 |
| AC154760  | 0,160738 | -0,00859 | 0,01  | 0,018 | 1 |
| Mterf2    | 0,16075  | -0,02642 | 0,079 | 0,099 | 1 |
| Fbxl12os  | 0,160877 | -0,01414 | 0,019 | 0,029 | 1 |
| Pdlim7    | 0,160997 | -0,01195 | 0,019 | 0,029 | 1 |
| Med18     | 0,161087 | -0,0165  | 0,069 | 0,088 | 1 |
| Enox2     | 0,161138 | -0,01753 | 0,18  | 0,21  | 1 |
| Irf2bp2   | 0,161274 | -0,04207 | 0,793 | 0,792 | 1 |
| Lyplal1   | 0,161434 | -0,01585 | 0,053 | 0,07  | 1 |

|          |          |          |       |       |   |
|----------|----------|----------|-------|-------|---|
| Nsmf     | 0,161461 | 0,036531 | 0,562 | 0,533 | 1 |
| Gm33979  | 0,16151  | 0,013877 | 0,021 | 0,011 | 1 |
| Nrep     | 0,16151  | 0,013877 | 0,021 | 0,011 | 1 |
| Gsta4    | 0,161566 | -0,00408 | 0,01  | 0,018 | 1 |
| Vdac2    | 0,161608 | -0,02929 | 0,932 | 0,945 | 1 |
| Zfp420   | 0,161678 | -0,02538 | 0,118 | 0,141 | 1 |
| Klc1     | 0,161709 | 0,065378 | 0,694 | 0,685 | 1 |
| Kdm4c    | 0,161866 | -0,0245  | 0,217 | 0,247 | 1 |
| Ttf1     | 0,16187  | -0,03655 | 0,256 | 0,285 | 1 |
| Kbtbd3   | 0,161902 | -0,02593 | 0,198 | 0,228 | 1 |
| Celf2    | 0,161948 | -0,0029  | 0,048 | 0,065 | 1 |
| Hey2     | 0,162014 | 0,018651 | 0,021 | 0,011 | 1 |
| Gm4593   | 0,162037 | -0,04132 | 0,552 | 0,58  | 1 |
| AA986860 | 0,162043 | -0,0215  | 0,068 | 0,086 | 1 |
| Ccdc78   | 0,162074 | -0,0116  | 0,019 | 0,029 | 1 |
| Mb21d2   | 0,162171 | 0,009313 | 0,129 | 0,104 | 1 |
| Tbc1d10a | 0,162185 | -0,01289 | 0,079 | 0,099 | 1 |
| Fbxl18   | 0,162234 | 0,039003 | 0,222 | 0,195 | 1 |
| Pxmp2    | 0,162258 | -0,02283 | 0,138 | 0,164 | 1 |
| Hspa9    | 0,162276 | 0,047523 | 0,808 | 0,81  | 1 |
| Gm26789  | 0,162307 | 0,016091 | 0,021 | 0,011 | 1 |
| Aftph    | 0,16232  | -0,02663 | 0,412 | 0,454 | 1 |
| Sec13    | 0,16244  | -0,02876 | 0,586 | 0,611 | 1 |
| 4930513D | 0,162483 | -0,00312 | 0,01  | 0,018 | 1 |
| Epc1     | 0,162576 | 0,064457 | 0,58  | 0,554 | 1 |
| Kifc5b   | 0,162579 | -0,01152 | 0,023 | 0,034 | 1 |
| Sav1     | 0,16258  | -0,0175  | 0,326 | 0,367 | 1 |
| Pcdh8    | 0,162653 | -0,00568 | 0,01  | 0,018 | 1 |
| Psma5    | 0,16276  | 0,042754 | 0,715 | 0,709 | 1 |
| Wdr47    | 0,162785 | -0,03967 | 0,337 | 0,366 | 1 |
| Rest     | 0,162832 | -0,0339  | 0,328 | 0,356 | 1 |
| Gm5914   | 0,162885 | -0,02996 | 0,091 | 0,112 | 1 |
| Prmt5    | 0,162953 | -0,01051 | 0,214 | 0,249 | 1 |
| Cd200    | 0,16298  | 0,009929 | 0,169 | 0,202 | 1 |
| Large1   | 0,162985 | -0,02475 | 0,074 | 0,093 | 1 |
| Pdzd7    | 0,16303  | 0,012271 | 0,021 | 0,011 | 1 |
| Kcnk2    | 0,163109 | 0,017641 | 0,021 | 0,011 | 1 |
| Gm9833   | 0,163273 | -0,01003 | 0,019 | 0,029 | 1 |
| Fbxw7    | 0,163362 | -0,01681 | 0,167 | 0,195 | 1 |
| Mpv17    | 0,163394 | -0,03261 | 0,487 | 0,519 | 1 |
| Fam72a   | 0,163404 | -0,00505 | 0,01  | 0,018 | 1 |
| Cenpv    | 0,163426 | 0,036881 | 0,228 | 0,2   | 1 |
| Gm48960  | 0,163618 | -0,00546 | 0,026 | 0,039 | 1 |
| Nans     | 0,163698 | -0,02121 | 0,211 | 0,244 | 1 |
| Supt20   | 0,16378  | 0,063594 | 0,452 | 0,444 | 1 |
| Map7d1   | 0,163925 | 0,03504  | 0,99  | 0,995 | 1 |
| Fam229b  | 0,16406  | -0,02716 | 0,159 | 0,185 | 1 |
| Atad2    | 0,164193 | 0,01813  | 0,093 | 0,073 | 1 |
| Dnajc27  | 0,164232 | -0,01177 | 0,117 | 0,141 | 1 |
| Fam160b1 | 0,164274 | -0,02795 | 0,243 | 0,275 | 1 |
| Gria4    | 0,164357 | -0,06667 | 0,282 | 0,306 | 1 |
| Pdcd11   | 0,164438 | 0,036281 | 0,32  | 0,289 | 1 |

|           |          |          |       |       |   |
|-----------|----------|----------|-------|-------|---|
| Champ1    | 0,164811 | -0,0307  | 0,172 | 0,2   | 1 |
| Cep95     | 0,164851 | -0,01509 | 0,128 | 0,153 | 1 |
| Rtn3      | 0,164958 | -0,01916 | 0,997 | 0,997 | 1 |
| Fastkd3   | 0,164966 | 0,014502 | 0,062 | 0,046 | 1 |
| Jdp2      | 0,165046 | 0,045889 | 0,377 | 0,35  | 1 |
| Gins3     | 0,165065 | -0,01545 | 0,066 | 0,085 | 1 |
| Tmem132a  | 0,165069 | -0,01914 | 0,178 | 0,208 | 1 |
| Zfx       | 0,165122 | -0,02733 | 0,289 | 0,327 | 1 |
| Ddhd2     | 0,165176 | 0,056218 | 0,523 | 0,498 | 1 |
| Hacd3     | 0,165188 | -0,02427 | 0,313 | 0,35  | 1 |
| 9330104G  | 0,16552  | -0,01978 | 0,089 | 0,111 | 1 |
| Cib2      | 0,165643 | -0,00838 | 0,019 | 0,029 | 1 |
| Elac2     | 0,165649 | 0,031563 | 0,168 | 0,143 | 1 |
| Poc1b     | 0,165656 | -0,03005 | 0,191 | 0,22  | 1 |
| Gipc1     | 0,16569  | -0,03336 | 0,48  | 0,509 | 1 |
| Gtf2e1    | 0,165787 | -0,01789 | 0,156 | 0,184 | 1 |
| Tarbp1    | 0,165799 | -0,0155  | 0,056 | 0,073 | 1 |
| Rusc1     | 0,165805 | 0,00715  | 0,021 | 0,011 | 1 |
| Rxra      | 0,166117 | -0,02818 | 0,073 | 0,091 | 1 |
| Ralgapa1  | 0,166126 | -0,0318  | 0,493 | 0,541 | 1 |
| Hbs1l     | 0,166156 | -0,0299  | 0,376 | 0,41  | 1 |
| Tbccd1    | 0,16622  | -0,03169 | 0,215 | 0,244 | 1 |
| Ttll12    | 0,166408 | -0,01641 | 0,116 | 0,14  | 1 |
| Eefsec    | 0,166409 | -0,02468 | 0,307 | 0,341 | 1 |
| Aacs      | 0,166458 | 0,080289 | 0,323 | 0,299 | 1 |
| Golga2    | 0,166489 | 0,045216 | 0,408 | 0,377 | 1 |
| Iqce      | 0,166505 | -0,0287  | 0,117 | 0,14  | 1 |
| Gm12258   | 0,166547 | -0,02552 | 0,096 | 0,117 | 1 |
| AC133505. | 0,166576 | -0,01026 | 0,04  | 0,055 | 1 |
| Traf7     | 0,166631 | -0,02296 | 0,184 | 0,213 | 1 |
| Atp1b2    | 0,166748 | -0,01723 | 0,08  | 0,101 | 1 |
| Amy1      | 0,166764 | 0,024644 | 0,12  | 0,098 | 1 |
| Kmt2d     | 0,167033 | -0,00974 | 0,431 | 0,475 | 1 |
| Psmd4     | 0,167072 | -0,02613 | 0,862 | 0,889 | 1 |
| 2700049A  | 0,167088 | -0,01271 | 0,109 | 0,133 | 1 |
| Bglap2    | 0,167189 | -0,00423 | 0,019 | 0,029 | 1 |
| Pds5a     | 0,167443 | 0,038176 | 0,473 | 0,452 | 1 |
| Suds3     | 0,167484 | -0,01331 | 0,374 | 0,426 | 1 |
| Phrf1     | 0,167553 | -0,03453 | 0,309 | 0,343 | 1 |
| Uxs1      | 0,167921 | -0,02567 | 0,252 | 0,283 | 1 |
| Sugt1     | 0,167958 | -0,05433 | 0,675 | 0,683 | 1 |
| Cpt2      | 0,168117 | -0,02213 | 0,165 | 0,192 | 1 |
| Stat5a    | 0,168142 | -0,00932 | 0,04  | 0,055 | 1 |
| D130040H  | 0,168354 | -0,02167 | 0,13  | 0,154 | 1 |
| Pms1      | 0,168534 | -0,01347 | 0,142 | 0,169 | 1 |
| Vapa      | 0,168559 | 0,038272 | 0,957 | 0,963 | 1 |
| St13      | 0,168576 | -0,022   | 0,989 | 0,987 | 1 |
| Nlrx1     | 0,168723 | -0,01595 | 0,046 | 0,062 | 1 |
| Scly      | 0,168899 | -0,02543 | 0,326 | 0,366 | 1 |
| Phip      | 0,168912 | -0,02541 | 0,775 | 0,784 | 1 |
| Kdm2b     | 0,168934 | -0,02687 | 0,214 | 0,242 | 1 |
| Ndel1     | 0,169    | -0,03027 | 0,402 | 0,433 | 1 |

|           |          |          |       |       |   |
|-----------|----------|----------|-------|-------|---|
| Spcc3     | 0,169112 | -0,04279 | 0,302 | 0,333 | 1 |
| Abcg2     | 0,169178 | 0,016632 | 0,058 | 0,042 | 1 |
| Uqcc3     | 0,16919  | -0,02724 | 0,424 | 0,459 | 1 |
| Sdhaf1    | 0,169232 | -0,02176 | 0,364 | 0,405 | 1 |
| Mrpl51    | 0,16924  | -0,03937 | 0,58  | 0,603 | 1 |
| Yipf2     | 0,169309 | 0,031709 | 0,267 | 0,237 | 1 |
| Eif2s3x   | 0,16931  | 0,045301 | 0,524 | 0,506 | 1 |
| 2700038G: | 0,16933  | 0,025583 | 0,079 | 0,062 | 1 |
| Fam214b   | 0,169425 | 0,046009 | 0,264 | 0,236 | 1 |
| Cercam    | 0,169434 | -0,02051 | 0,212 | 0,244 | 1 |
| Zbtb3     | 0,169459 | 0,010355 | 0,023 | 0,013 | 1 |
| Nudt12    | 0,169748 | -0,01104 | 0,046 | 0,062 | 1 |
| Ncl       | 0,170094 | 0,033857 | 0,974 | 0,958 | 1 |
| Dpp3      | 0,170111 | -0,02966 | 0,303 | 0,338 | 1 |
| Tfb1m     | 0,170112 | -0,01609 | 0,116 | 0,14  | 1 |
| Ubp1      | 0,170255 | -0,04588 | 0,319 | 0,345 | 1 |
| Mterf4    | 0,170286 | -0,01691 | 0,141 | 0,167 | 1 |
| Arhgap17  | 0,170387 | -0,02724 | 0,414 | 0,454 | 1 |
| Acat2     | 0,17049  | 0,067072 | 0,394 | 0,379 | 1 |
| Phlda1    | 0,170547 | 0,035055 | 0,266 | 0,231 | 1 |
| Pomt2     | 0,170677 | 0,035655 | 0,248 | 0,22  | 1 |
| Dnajc18   | 0,170809 | -0,02378 | 0,633 | 0,654 | 1 |
| Commd8    | 0,170833 | -0,04341 | 0,556 | 0,585 | 1 |
| Dnaja1    | 0,171011 | -0,0285  | 0,958 | 0,979 | 1 |
| Hook3     | 0,171134 | -0,04038 | 0,862 | 0,885 | 1 |
| Spag9     | 0,171222 | -0,02748 | 0,967 | 0,98  | 1 |
| Uqcc1     | 0,17138  | -0,0412  | 0,196 | 0,221 | 1 |
| Sema5a    | 0,171534 | -0,05149 | 0,289 | 0,317 | 1 |
| Etfb      | 0,171564 | -0,02866 | 0,614 | 0,637 | 1 |
| Hibch     | 0,171813 | -0,02953 | 0,269 | 0,301 | 1 |
| Usp30     | 0,171961 | -0,01422 | 0,459 | 0,511 | 1 |
| Pbxip1    | 0,17206  | -0,02286 | 0,186 | 0,215 | 1 |
| Rnf26     | 0,172085 | -0,01874 | 0,184 | 0,213 | 1 |
| Eri3      | 0,172145 | -0,03982 | 0,553 | 0,574 | 1 |
| Ctcf      | 0,172151 | 0,053004 | 0,72  | 0,714 | 1 |
| Khdrbs2   | 0,172157 | -0,0143  | 0,026 | 0,037 | 1 |
| Traf3     | 0,172201 | -0,02953 | 0,084 | 0,104 | 1 |
| Cd320     | 0,172334 | -0,03055 | 0,181 | 0,208 | 1 |
| Tenm3     | 0,172605 | -0,00712 | 0,036 | 0,05  | 1 |
| Tsc2      | 0,172745 | -0,05426 | 0,374 | 0,402 | 1 |
| Vamp1     | 0,172779 | -0,00921 | 0,093 | 0,115 | 1 |
| 9930012K: | 0,173021 | 0,021138 | 0,069 | 0,052 | 1 |
| Gcsh      | 0,173065 | -0,01171 | 0,302 | 0,341 | 1 |
| Polr2m    | 0,173326 | -0,02384 | 0,436 | 0,473 | 1 |
| Magi2     | 0,173343 | 0,038294 | 0,919 | 0,909 | 1 |
| Gm44658   | 0,173428 | -0,00948 | 0,014 | 0,023 | 1 |
| Gm30025   | 0,173456 | -0,03021 | 0,18  | 0,207 | 1 |
| Hmga2     | 0,173462 | -0,01115 | 0,009 | 0,016 | 1 |
| Pfn4      | 0,173535 | 0,025585 | 0,09  | 0,072 | 1 |
| Ucp2      | 0,173546 | -0,01586 | 0,022 | 0,033 | 1 |
| Card6     | 0,173728 | 0,011027 | 0,014 | 0,007 | 1 |
| Pir       | 0,173787 | 0,023039 | 0,133 | 0,111 | 1 |



|           |          |          |       |       |   |
|-----------|----------|----------|-------|-------|---|
| Dcakd     | 0,173791 | 0,029369 | 0,166 | 0,141 | 1 |
| Ppp1r26   | 0,173995 | 0,015742 | 0,026 | 0,016 | 1 |
| Psmb3     | 0,174039 | 0,036981 | 0,92  | 0,914 | 1 |
| Crem      | 0,174045 | -0,02327 | 0,156 | 0,182 | 1 |
| Tvp23bos  | 0,174106 | 0,009097 | 0,014 | 0,007 | 1 |
| 4933411EC | 0,174106 | 0,011027 | 0,014 | 0,007 | 1 |
| Gm3055    | 0,174106 | 0,010062 | 0,014 | 0,007 | 1 |
| Gm42495   | 0,174196 | -0,00893 | 0,009 | 0,016 | 1 |
| Dqx1      | 0,174205 | 0,015512 | 0,014 | 0,007 | 1 |
| Necap1    | 0,174346 | -0,01848 | 0,211 | 0,241 | 1 |
| Gm48604   | 0,174424 | -0,01561 | 0,022 | 0,033 | 1 |
| Sypl      | 0,174449 | 0,025904 | 0,994 | 0,992 | 1 |
| 9330102EC | 0,174484 | 0,00813  | 0,014 | 0,007 | 1 |
| Gm49064   | 0,174484 | 0,00813  | 0,014 | 0,007 | 1 |
| Zcchc14   | 0,174547 | -0,00958 | 0,311 | 0,354 | 1 |
| 2610524H  | 0,174577 | -0,02358 | 0,177 | 0,205 | 1 |
| Gm48071   | 0,174659 | 0,014791 | 0,026 | 0,016 | 1 |
| Eif2b2    | 0,174808 | -0,01302 | 0,346 | 0,389 | 1 |
| Nek11     | 0,174863 | 0,007162 | 0,014 | 0,007 | 1 |
| 1110019D  | 0,174944 | -0,01445 | 0,068 | 0,086 | 1 |
| Katnbl1   | 0,174965 | -0,02149 | 0,21  | 0,239 | 1 |
| Ints6     | 0,175028 | 0,092265 | 0,409 | 0,39  | 1 |
| Sytl2     | 0,175037 | 0,063163 | 0,817 | 0,813 | 1 |
| Map3k14   | 0,175059 | 0,007801 | 0,014 | 0,007 | 1 |
| Xcr1      | 0,175086 | 0,010022 | 0,025 | 0,015 | 1 |
| Arl6ip5   | 0,175087 | -0,01291 | 0,723 | 0,772 | 1 |
| Adarb2    | 0,175123 | -0,00796 | 0,009 | 0,016 | 1 |
| Dnd1      | 0,17534  | -0,00914 | 0,014 | 0,023 | 1 |
| Gnb1      | 0,175488 | 0,041828 | 0,974 | 0,967 | 1 |
| Mrps26    | 0,175521 | 0,049295 | 0,502 | 0,488 | 1 |
| Sdccag3   | 0,175527 | -0,02596 | 0,479 | 0,517 | 1 |
| Zfp438    | 0,175591 | 0,034161 | 0,139 | 0,117 | 1 |
| Irgq      | 0,175659 | 0,033554 | 0,124 | 0,102 | 1 |
| Utp14b    | 0,175774 | 0,017834 | 0,412 | 0,457 | 1 |
| Ip6k1     | 0,175795 | -0,0398  | 0,495 | 0,522 | 1 |
| E4f1      | 0,175814 | -0,01683 | 0,215 | 0,249 | 1 |
| Tns3      | 0,175847 | -0,03313 | 0,594 | 0,629 | 1 |
| Anks1     | 0,175857 | -0,04988 | 0,236 | 0,262 | 1 |
| Lepr      | 0,175871 | -0,00755 | 0,009 | 0,016 | 1 |
| Plaur     | 0,175958 | -0,00636 | 0,009 | 0,016 | 1 |
| AC110241  | 0,175971 | 0,030071 | 0,131 | 0,109 | 1 |
| Bcs1l     | 0,175978 | -0,01375 | 0,156 | 0,184 | 1 |
| Imp4      | 0,176158 | 0,039809 | 0,539 | 0,502 | 1 |
| Ninj1     | 0,176188 | -0,00703 | 0,106 | 0,128 | 1 |
| Slc25a46  | 0,176199 | -0,02632 | 0,383 | 0,424 | 1 |
| Gm36266   | 0,176236 | -0,00286 | 0,018 | 0,028 | 1 |
| Ptgds     | 0,176308 | -0,06369 | 0,892 | 0,863 | 1 |
| Prss41    | 0,176334 | 0,015093 | 0,026 | 0,016 | 1 |
| Gm47059   | 0,176375 | -0,01118 | 0,022 | 0,033 | 1 |
| Exosc4    | 0,176386 | -0,02631 | 0,396 | 0,431 | 1 |
| Ttl       | 0,176442 | 0,036695 | 0,124 | 0,102 | 1 |
| Mospd3    | 0,176473 | -0,0291  | 0,152 | 0,177 | 1 |

|          |          |          |       |       |   |
|----------|----------|----------|-------|-------|---|
| Ppfia3   | 0,176493 | 0,010644 | 0,025 | 0,015 | 1 |
| Cdk11b   | 0,176693 | 0,02668  | 0,622 | 0,577 | 1 |
| Myrf     | 0,176693 | 0,03321  | 0,989 | 0,998 | 1 |
| Mboat1   | 0,176875 | 0,050357 | 0,442 | 0,411 | 1 |
| Sc5d     | 0,176894 | 0,053398 | 0,834 | 0,844 | 1 |
| Smc3     | 0,176953 | -0,02803 | 0,743 | 0,784 | 1 |
| Rnpepl1  | 0,176966 | 0,031859 | 0,647 | 0,608 | 1 |
| Syncrip  | 0,177035 | 0,059938 | 0,578 | 0,554 | 1 |
| Alg3     | 0,177064 | -0,01988 | 0,111 | 0,133 | 1 |
| Gm15991  | 0,177073 | -0,01274 | 0,022 | 0,033 | 1 |
| Smurf1   | 0,17708  | 0,030397 | 0,184 | 0,158 | 1 |
| Pias2    | 0,177149 | 0,043186 | 0,356 | 0,325 | 1 |
| Gm29825  | 0,177192 | -0,01099 | 0,018 | 0,028 | 1 |
| Gm9774   | 0,177198 | 0,012092 | 0,052 | 0,037 | 1 |
| Tpx2     | 0,177338 | -0,01126 | 0,018 | 0,028 | 1 |
| Pycard   | 0,177401 | 0,020144 | 0,048 | 0,034 | 1 |
| Lysmd3   | 0,177545 | -0,00829 | 0,34  | 0,379 | 1 |
| Cacng7   | 0,177629 | -0,03299 | 0,323 | 0,356 | 1 |
| Depdc5   | 0,177701 | -0,03467 | 0,295 | 0,325 | 1 |
| Gjc2     | 0,177814 | -0,02206 | 0,97  | 0,984 | 1 |
| L3mbtl2  | 0,177844 | -0,03306 | 0,209 | 0,237 | 1 |
| Gdpd1    | 0,177889 | -0,05276 | 0,569 | 0,584 | 1 |
| Ncoa3    | 0,178061 | 0,042232 | 0,507 | 0,475 | 1 |
| Col13a1  | 0,178096 | 0,011167 | 0,069 | 0,052 | 1 |
| Med15    | 0,178219 | -0,0239  | 0,349 | 0,387 | 1 |
| Gm28151  | 0,178305 | -0,01064 | 0,018 | 0,028 | 1 |
| Mafa     | 0,178319 | 0,014143 | 0,028 | 0,018 | 1 |
| Ppl      | 0,178336 | 0,021138 | 0,048 | 0,034 | 1 |
| Inpp4a   | 0,178396 | -0,01623 | 0,052 | 0,068 | 1 |
| Zdbf2    | 0,178406 | 0,00294  | 0,003 | 0     | 1 |
| Cd48     | 0,178406 | 0,00294  | 0,003 | 0     | 1 |
| Cd84     | 0,178406 | 0,00294  | 0,003 | 0     | 1 |
| Spaca9   | 0,178406 | 0,00294  | 0,003 | 0     | 1 |
| Ttc16    | 0,178406 | 0,00294  | 0,003 | 0     | 1 |
| Olfr1156 | 0,178406 | 0,00294  | 0,003 | 0     | 1 |
| Il1b     | 0,178406 | 0,00294  | 0,003 | 0     | 1 |
| Cfap61   | 0,178406 | 0,00294  | 0,003 | 0     | 1 |
| Gpc4     | 0,178406 | 0,00294  | 0,003 | 0     | 1 |
| Kcne1l   | 0,178406 | 0,00294  | 0,003 | 0     | 1 |
| Htr2c    | 0,178406 | 0,00294  | 0,003 | 0     | 1 |
| Tlr2     | 0,178406 | 0,00294  | 0,003 | 0     | 1 |
| Gm40155  | 0,178406 | 0,00294  | 0,003 | 0     | 1 |
| Bmpr1b   | 0,178406 | 0,00294  | 0,003 | 0     | 1 |
| Ak4      | 0,178406 | 0,00294  | 0,003 | 0     | 1 |
| Echdc2   | 0,178406 | 0,00294  | 0,003 | 0     | 1 |
| Skint8   | 0,178406 | 0,00294  | 0,003 | 0     | 1 |
| Nphp4    | 0,178406 | 0,00294  | 0,003 | 0     | 1 |
| Fbxl13   | 0,178406 | 0,00294  | 0,003 | 0     | 1 |
| Rhoh     | 0,178406 | 0,00294  | 0,003 | 0     | 1 |
| Hcar2    | 0,178406 | 0,00294  | 0,003 | 0     | 1 |
| Gm26826  | 0,178406 | 0,00294  | 0,003 | 0     | 1 |
| Cd22     | 0,178406 | 0,00294  | 0,003 | 0     | 1 |

|           |          |          |       |   |   |
|-----------|----------|----------|-------|---|---|
| G630030JC | 0,178406 | 0,00294  | 0,003 | 0 | 1 |
| Gm9885    | 0,178406 | 0,00294  | 0,003 | 0 | 1 |
| Tsku      | 0,178406 | 0,00294  | 0,003 | 0 | 1 |
| Coro1a    | 0,178406 | 0,00294  | 0,003 | 0 | 1 |
| Plpp4     | 0,178406 | 0,00294  | 0,003 | 0 | 1 |
| Hebp2     | 0,178406 | 0,00294  | 0,003 | 0 | 1 |
| Pkib      | 0,178406 | 0,00294  | 0,003 | 0 | 1 |
| Pawr      | 0,178406 | 0,00294  | 0,003 | 0 | 1 |
| Ptprb     | 0,178406 | 0,00294  | 0,003 | 0 | 1 |
| Stat6     | 0,178406 | 0,00294  | 0,003 | 0 | 1 |
| Gm16230   | 0,178406 | 0,00294  | 0,003 | 0 | 1 |
| Col4a2    | 0,178406 | 0,00294  | 0,003 | 0 | 1 |
| Jak3      | 0,178406 | 0,00294  | 0,003 | 0 | 1 |
| Cdkn3     | 0,178406 | 0,00294  | 0,003 | 0 | 1 |
| Rec8      | 0,178406 | 0,00294  | 0,003 | 0 | 1 |
| Pdgfd     | 0,178406 | 0,00294  | 0,003 | 0 | 1 |
| Fli1      | 0,178406 | 0,00294  | 0,003 | 0 | 1 |
| 1700110K: | 0,178406 | 0,00294  | 0,003 | 0 | 1 |
| Tcf7      | 0,178406 | 0,00294  | 0,003 | 0 | 1 |
| Mycbpap   | 0,178406 | 0,00294  | 0,003 | 0 | 1 |
| Plxdc1    | 0,178406 | 0,00294  | 0,003 | 0 | 1 |
| Plcd3     | 0,178406 | 0,00294  | 0,003 | 0 | 1 |
| Cap2      | 0,178406 | 0,00294  | 0,003 | 0 | 1 |
| Golm1     | 0,178406 | 0,00294  | 0,003 | 0 | 1 |
| Fbp1      | 0,178406 | 0,00294  | 0,003 | 0 | 1 |
| Gm26527   | 0,178406 | 0,00294  | 0,003 | 0 | 1 |
| Efcab10   | 0,178406 | 0,00294  | 0,003 | 0 | 1 |
| Batf      | 0,178406 | 0,00294  | 0,003 | 0 | 1 |
| Pced1b    | 0,178406 | 0,00294  | 0,003 | 0 | 1 |
| Gpsm3     | 0,178406 | 0,00294  | 0,003 | 0 | 1 |
| H2-Q6     | 0,178406 | 0,00294  | 0,003 | 0 | 1 |
| Alk       | 0,178406 | 0,00294  | 0,003 | 0 | 1 |
| Ankrd29   | 0,178406 | 0,00294  | 0,003 | 0 | 1 |
| Itpr3     | 0,178406 | 0,008793 | 0,003 | 0 | 1 |
| Angptl3   | 0,178406 | 0,006846 | 0,003 | 0 | 1 |
| Ntng1     | 0,178406 | 0,005871 | 0,003 | 0 | 1 |
| Kcnip4    | 0,178406 | 0,005871 | 0,003 | 0 | 1 |
| Spry4     | 0,178406 | 0,005871 | 0,003 | 0 | 1 |
| Col5a2    | 0,178406 | 0,004895 | 0,003 | 0 | 1 |
| P2ry2     | 0,178406 | 0,004895 | 0,003 | 0 | 1 |
| Stx11     | 0,178406 | 0,004895 | 0,003 | 0 | 1 |
| Gm15222   | 0,178406 | 0,004895 | 0,003 | 0 | 1 |
| Kif23     | 0,178406 | 0,004895 | 0,003 | 0 | 1 |
| AC153140. | 0,178406 | 0,004895 | 0,003 | 0 | 1 |
| Rgs6      | 0,178406 | 0,004895 | 0,003 | 0 | 1 |
| Shank3    | 0,178406 | 0,004895 | 0,003 | 0 | 1 |
| Fcgr2b    | 0,178406 | 0,003918 | 0,003 | 0 | 1 |
| Meig1     | 0,178406 | 0,003918 | 0,003 | 0 | 1 |
| Xlr4a     | 0,178406 | 0,003918 | 0,003 | 0 | 1 |
| Hspb7     | 0,178406 | 0,003918 | 0,003 | 0 | 1 |
| Gm45894   | 0,178406 | 0,003918 | 0,003 | 0 | 1 |
| Shisa2    | 0,178406 | 0,003918 | 0,003 | 0 | 1 |

|           |          |          |       |       |   |
|-----------|----------|----------|-------|-------|---|
| Zmynd15   | 0,178406 | 0,003918 | 0,003 | 0     | 1 |
| 1810034E1 | 0,178406 | 0,003918 | 0,003 | 0     | 1 |
| Sh3bp1    | 0,178406 | 0,003918 | 0,003 | 0     | 1 |
| Vpreb1    | 0,178406 | 0,003918 | 0,003 | 0     | 1 |
| Gal3st3   | 0,178406 | 0,003918 | 0,003 | 0     | 1 |
| Gldc      | 0,178406 | 0,003918 | 0,003 | 0     | 1 |
| Prx       | 0,178406 | 0,013645 | 0,003 | 0     | 1 |
| Trank1    | 0,178406 | 0,009766 | 0,003 | 0     | 1 |
| Hcn3      | 0,178406 | 0,005871 | 0,003 | 0     | 1 |
| Pgam1     | 0,178645 | -0,0222  | 0,878 | 0,898 | 1 |
| Tfcp2     | 0,178678 | -0,02389 | 0,243 | 0,273 | 1 |
| Taf4      | 0,178742 | -0,0232  | 0,143 | 0,167 | 1 |
| Vps37b    | 0,178761 | 0,038055 | 0,18  | 0,153 | 1 |
| Scmh1     | 0,178875 | -0,01078 | 0,294 | 0,335 | 1 |
| Rfc2      | 0,178908 | -0,01705 | 0,614 | 0,655 | 1 |
| Tnrc6c    | 0,178947 | 0,072955 | 0,789 | 0,774 | 1 |
| Urb1      | 0,178971 | -0,019   | 0,084 | 0,104 | 1 |
| Crk       | 0,179012 | -0,03613 | 0,644 | 0,662 | 1 |
| Paxip1    | 0,179036 | 0,043581 | 0,199 | 0,176 | 1 |
| B2m       | 0,179126 | -0,13418 | 0,722 | 0,665 | 1 |
| K230015D1 | 0,179162 | 0,009379 | 0,026 | 0,016 | 1 |
| Taf11     | 0,179174 | 0,039072 | 0,43  | 0,398 | 1 |
| Coq9      | 0,179242 | -0,00879 | 0,246 | 0,281 | 1 |
| Phf6      | 0,179257 | 0,030212 | 0,223 | 0,195 | 1 |
| 3110040N1 | 0,17936  | 0,0245   | 0,15  | 0,127 | 1 |
| Ttc5      | 0,179367 | -0,0324  | 0,397 | 0,429 | 1 |
| Nr4a3     | 0,179414 | 0,034306 | 0,032 | 0,021 | 1 |
| Atg7      | 0,17945  | -0,01167 | 0,251 | 0,286 | 1 |
| Chst12    | 0,179548 | -0,02424 | 0,261 | 0,293 | 1 |
| Prr12     | 0,179551 | -0,03657 | 0,272 | 0,299 | 1 |
| Tapt1     | 0,179587 | -0,03073 | 0,423 | 0,462 | 1 |
| Maf1      | 0,179595 | 0,045896 | 0,612 | 0,621 | 1 |
| Aasdhpt   | 0,179652 | -0,03509 | 0,32  | 0,35  | 1 |
| 4933415A1 | 0,179702 | -0,00619 | 0,018 | 0,028 | 1 |
| 4930481A1 | 0,179936 | -0,009   | 0,022 | 0,033 | 1 |
| Acyp1     | 0,179974 | -0,0197  | 0,322 | 0,356 | 1 |
| Gm20186   | 0,180002 | 0,015695 | 0,032 | 0,021 | 1 |
| Prickle2  | 0,180003 | -0,0412  | 0,417 | 0,444 | 1 |
| Slc4a1ap  | 0,180022 | -0,02019 | 0,249 | 0,283 | 1 |
| Msh6      | 0,180072 | -0,02442 | 0,153 | 0,179 | 1 |
| Rev3l     | 0,180154 | -0,03248 | 0,297 | 0,328 | 1 |
| Inhbb     | 0,18018  | 0,012333 | 0,009 | 0,003 | 1 |
| Dus1l     | 0,180184 | -0,02874 | 0,202 | 0,229 | 1 |
| Tnfaip1   | 0,180216 | -0,03229 | 0,206 | 0,233 | 1 |
| Sertad4   | 0,180677 | 0,014263 | 0,009 | 0,003 | 1 |
| Nlk       | 0,180723 | -0,04411 | 0,369 | 0,402 | 1 |
| Nit1      | 0,180778 | 0,046925 | 0,413 | 0,395 | 1 |
| mt-Nd2    | 0,180812 | -0,03015 | 0,999 | 1     | 1 |
| Hist1h1e  | 0,180857 | 0,023253 | 0,174 | 0,148 | 1 |
| Tada2a    | 0,180945 | -0,02074 | 0,311 | 0,346 | 1 |
| Cox5b     | 0,181013 | -0,03155 | 0,973 | 0,989 | 1 |
| Psmf1     | 0,181048 | -0,03255 | 0,25  | 0,28  | 1 |

|           |          |          |       |       |   |
|-----------|----------|----------|-------|-------|---|
| Fbxl20    | 0,18115  | -0,02664 | 0,288 | 0,32  | 1 |
| Ap1g1     | 0,181155 | -0,0044  | 0,366 | 0,407 | 1 |
| Mettl27   | 0,181174 | 0,00749  | 0,009 | 0,003 | 1 |
| Gdf15     | 0,181174 | 0,010399 | 0,009 | 0,003 | 1 |
| Tmpo      | 0,181278 | 0,040048 | 0,562 | 0,537 | 1 |
| Gm21917   | 0,181423 | 0,00749  | 0,009 | 0,003 | 1 |
| Arhgef4   | 0,181423 | 0,006519 | 0,009 | 0,003 | 1 |
| A430110L2 | 0,181423 | 0,006519 | 0,009 | 0,003 | 1 |
| Gm19710   | 0,181423 | 0,006519 | 0,009 | 0,003 | 1 |
| Gm15637   | 0,181423 | 0,006519 | 0,009 | 0,003 | 1 |
| Serpina9  | 0,181423 | 0,006519 | 0,009 | 0,003 | 1 |
| Gm7276    | 0,181423 | 0,006519 | 0,009 | 0,003 | 1 |
| Wdr33     | 0,181428 | -0,00743 | 0,304 | 0,341 | 1 |
| Alkbh1    | 0,181443 | -0,04881 | 0,279 | 0,302 | 1 |
| Dnajb11   | 0,181455 | -0,03848 | 0,606 | 0,624 | 1 |
| Chd3os    | 0,181464 | -0,01589 | 0,058 | 0,075 | 1 |
| Rpl41     | 0,181536 | 0,027754 | 0,998 | 0,998 | 1 |
| Esco2     | 0,181672 | 0,005547 | 0,009 | 0,003 | 1 |
| Ppp1r14b  | 0,181722 | -0,02462 | 0,153 | 0,179 | 1 |
| 1190002N  | 0,181841 | -0,02993 | 0,338 | 0,371 | 1 |
| Cobll1    | 0,181846 | 0,042527 | 0,503 | 0,475 | 1 |
| Vat1l     | 0,181924 | 0,016938 | 0,03  | 0,02  | 1 |
| Cep170b   | 0,181951 | -0,03609 | 0,169 | 0,193 | 1 |
| Taok3     | 0,18204  | -0,03842 | 0,506 | 0,541 | 1 |
| Pgbd1     | 0,18205  | 0,006841 | 0,009 | 0,003 | 1 |
| Rab28     | 0,182123 | -0,02533 | 0,312 | 0,345 | 1 |
| Gm15441   | 0,182174 | 0,007811 | 0,009 | 0,003 | 1 |
| Aifm1     | 0,182183 | -0,02116 | 0,231 | 0,262 | 1 |
| lws1      | 0,182282 | 0,021048 | 0,444 | 0,402 | 1 |
| Gm45159   | 0,1823   | 0,005871 | 0,009 | 0,003 | 1 |
| Pcbp3     | 0,182331 | -0,01843 | 0,079 | 0,098 | 1 |
| Camkk2    | 0,182354 | -0,01875 | 0,038 | 0,052 | 1 |
| Tspan32os | 0,182425 | 0,005224 | 0,009 | 0,003 | 1 |
| Ctnnbl1   | 0,182433 | -0,02786 | 0,235 | 0,263 | 1 |
| Rab37     | 0,182437 | -0,08268 | 0,243 | 0,268 | 1 |
| Tsnax     | 0,182543 | -0,01621 | 0,5   | 0,554 | 1 |
| Fem1b     | 0,182633 | 0,029291 | 0,311 | 0,278 | 1 |
| Polr3h    | 0,182646 | -0,01733 | 0,333 | 0,371 | 1 |
| 1700109H  | 0,182694 | 0,021279 | 0,061 | 0,046 | 1 |
| Cfp       | 0,182701 | -0,0136  | 0,028 | 0,041 | 1 |
| Uck1      | 0,182963 | -0,02164 | 0,322 | 0,356 | 1 |
| Cox7a2l   | 0,183033 | -0,02227 | 0,785 | 0,826 | 1 |
| Tbc1d32   | 0,183039 | 0,031296 | 0,132 | 0,111 | 1 |
| Ilkap     | 0,183041 | 0,039272 | 0,592 | 0,558 | 1 |
| Zfp428    | 0,183064 | -0,01564 | 0,112 | 0,135 | 1 |
| Chd9      | 0,183302 | -0,05576 | 0,563 | 0,572 | 1 |
| Asb11     | 0,18343  | 0,005224 | 0,009 | 0,003 | 1 |
| Adcy9     | 0,183651 | -0,01891 | 0,131 | 0,154 | 1 |
| Bcl2l13   | 0,183679 | 0,036932 | 0,132 | 0,111 | 1 |
| Ceacam1   | 0,183695 | 0,026578 | 0,07  | 0,054 | 1 |
| Cog8      | 0,183792 | -0,04504 | 0,241 | 0,268 | 1 |
| lars      | 0,184045 | 0,032372 | 0,571 | 0,527 | 1 |

|          |          |          |       |       |   |
|----------|----------|----------|-------|-------|---|
| Mtss1    | 0,18422  | 0,038678 | 0,787 | 0,758 | 1 |
| Plcd4    | 0,184432 | -0,0092  | 0,028 | 0,041 | 1 |
| Aff1     | 0,184482 | -0,01727 | 0,192 | 0,223 | 1 |
| Tsn      | 0,184544 | -0,04041 | 0,842 | 0,865 | 1 |
| Arsg     | 0,184581 | -0,03358 | 0,926 | 0,941 | 1 |
| Shd      | 0,184613 | 0,009362 | 0,03  | 0,02  | 1 |
| Rab34    | 0,184661 | 0,016243 | 0,036 | 0,024 | 1 |
| Kbtbd2   | 0,184677 | -0,01113 | 0,297 | 0,335 | 1 |
| Srsf9    | 0,184695 | -0,02237 | 0,614 | 0,66  | 1 |
| Ralgapb  | 0,184757 | -0,03597 | 0,387 | 0,42  | 1 |
| Tmed7    | 0,184845 | 0,043775 | 0,948 | 0,938 | 1 |
| Isca2    | 0,185083 | -0,02059 | 0,364 | 0,407 | 1 |
| Kdm2a    | 0,185191 | 0,077441 | 0,653 | 0,66  | 1 |
| Slc30a4  | 0,18544  | 0,028012 | 0,255 | 0,226 | 1 |
| Rpp25l   | 0,185481 | -0,03134 | 0,293 | 0,324 | 1 |
| Igsf9b   | 0,185507 | 0,046873 | 0,202 | 0,177 | 1 |
| Taf10    | 0,185569 | -0,0333  | 0,645 | 0,676 | 1 |
| Cep76    | 0,185822 | -0,0191  | 0,057 | 0,073 | 1 |
| Phf1     | 0,185838 | -0,01694 | 0,22  | 0,249 | 1 |
| Stam2    | 0,186084 | -0,02219 | 0,392 | 0,428 | 1 |
| Gemin5   | 0,186473 | -0,02731 | 0,118 | 0,14  | 1 |
| Dhx33    | 0,186523 | -0,01593 | 0,076 | 0,094 | 1 |
| Cyp4f17  | 0,186542 | -0,01248 | 0,025 | 0,036 | 1 |
| Kat14    | 0,186783 | 0,033702 | 0,193 | 0,169 | 1 |
| Tcirg1   | 0,186785 | 0,049484 | 0,297 | 0,275 | 1 |
| Mmachc   | 0,186788 | -0,01078 | 0,045 | 0,06  | 1 |
| Pde4b    | 0,186842 | -0,02134 | 0,964 | 0,974 | 1 |
| Erich1   | 0,187044 | 0,038312 | 0,186 | 0,163 | 1 |
| Dnajc15  | 0,187079 | -0,03988 | 0,487 | 0,515 | 1 |
| Parp4    | 0,187085 | -0,03671 | 0,265 | 0,294 | 1 |
| Kcna1    | 0,187138 | 0,042602 | 0,903 | 0,878 | 1 |
| 1810022K | 0,187265 | -0,03655 | 0,625 | 0,654 | 1 |
| Nup50    | 0,187266 | -0,00965 | 0,301 | 0,34  | 1 |
| Mdk      | 0,187319 | 0,01134  | 0,016 | 0,008 | 1 |
| Adgra2   | 0,187319 | 0,010377 | 0,016 | 0,008 | 1 |
| Aldoa    | 0,187445 | 0,033809 | 0,996 | 1     | 1 |
| Uchl5    | 0,187449 | -0,01533 | 0,275 | 0,307 | 1 |
| Depdc7   | 0,18751  | -0,00987 | 0,288 | 0,325 | 1 |
| Gdi2     | 0,187602 | -0,03437 | 0,909 | 0,911 | 1 |
| Ankrd23  | 0,1877   | -0,01142 | 0,013 | 0,021 | 1 |
| Gm45605  | 0,187745 | 0,020362 | 0,057 | 0,042 | 1 |
| Mybl2    | 0,187781 | 0,010377 | 0,016 | 0,008 | 1 |
| Mapk1    | 0,187821 | -0,01771 | 0,644 | 0,678 | 1 |
| Ttll3    | 0,187851 | -0,01878 | 0,084 | 0,104 | 1 |
| Galnt11  | 0,187858 | -0,02791 | 0,316 | 0,346 | 1 |
| Gfod2    | 0,187865 | 0,022161 | 0,112 | 0,135 | 1 |
| Elp2     | 0,187902 | 0,027222 | 0,271 | 0,239 | 1 |
| Grasp    | 0,187939 | 0,041243 | 0,175 | 0,151 | 1 |
| Med28    | 0,188054 | -0,01992 | 0,601 | 0,647 | 1 |
| Terf2ip  | 0,188196 | -0,01377 | 0,37  | 0,4   | 1 |
| Baz1b    | 0,188235 | -0,04397 | 0,661 | 0,683 | 1 |
| Rbm11    | 0,188237 | -0,01314 | 0,067 | 0,085 | 1 |

|           |          |          |       |       |   |
|-----------|----------|----------|-------|-------|---|
| Bcat2     | 0,188276 | -0,02292 | 0,146 | 0,171 | 1 |
| Trim28    | 0,188308 | 0,04754  | 0,533 | 0,511 | 1 |
| Pdk4      | 0,188421 | -0,01116 | 0,174 | 0,202 | 1 |
| Nop2      | 0,188502 | 0,019154 | 0,12  | 0,098 | 1 |
| H3f3aos   | 0,188715 | 0,009728 | 0,016 | 0,008 | 1 |
| Gm17135   | 0,188719 | 0,010042 | 0,016 | 0,008 | 1 |
| Zfp677    | 0,188724 | -0,01272 | 0,079 | 0,099 | 1 |
| Tubb5     | 0,188824 | -0,02308 | 0,71  | 0,743 | 1 |
| Gm42788   | 0,188906 | 0,003076 | 0,048 | 0,034 | 1 |
| 9430065F1 | 0,189147 | -0,01762 | 0,066 | 0,083 | 1 |
| Sord      | 0,189256 | -0,02923 | 0,117 | 0,138 | 1 |
| Btbd2     | 0,189329 | -0,01541 | 0,211 | 0,241 | 1 |
| Rab40b    | 0,189387 | -0,01188 | 0,038 | 0,052 | 1 |
| Bex3      | 0,189619 | 0,026309 | 0,274 | 0,244 | 1 |
| Osgep     | 0,189636 | -0,02407 | 0,46  | 0,506 | 1 |
| Carhsp1   | 0,18975  | -0,04909 | 0,97  | 0,985 | 1 |
| Rs1       | 0,18981  | -0,01465 | 0,021 | 0,031 | 1 |
| Mok       | 0,189884 | -0,00886 | 0,013 | 0,021 | 1 |
| Ubr2      | 0,189912 | 0,049942 | 0,783 | 0,769 | 1 |
| St3gal1   | 0,190092 | 0,030742 | 0,106 | 0,086 | 1 |
| Trp53bp2  | 0,190375 | 0,040411 | 0,809 | 0,785 | 1 |
| Actn1     | 0,190478 | -0,02155 | 0,092 | 0,112 | 1 |
| Dcaf17    | 0,190517 | -0,07947 | 0,8   | 0,803 | 1 |
| Osbpl5    | 0,190587 | -0,01735 | 0,136 | 0,161 | 1 |
| Actr5     | 0,190685 | -0,01666 | 0,157 | 0,184 | 1 |
| Vcpi1     | 0,190693 | -0,01048 | 0,376 | 0,418 | 1 |
| Rgs10     | 0,1907   | -0,00671 | 0,008 | 0,015 | 1 |
| Srp54b    | 0,1907   | -0,00671 | 0,008 | 0,015 | 1 |
| Gm10373   | 0,190702 | -0,00893 | 0,008 | 0,015 | 1 |
| Ribc2     | 0,190702 | -0,00893 | 0,008 | 0,015 | 1 |
| Cenpm     | 0,190734 | -0,01327 | 0,013 | 0,021 | 1 |
| Cd300lf   | 0,190806 | -0,00734 | 0,008 | 0,015 | 1 |
| Snx30     | 0,19085  | -0,01785 | 0,807 | 0,844 | 1 |
| Rnaseh2b  | 0,190867 | -0,02707 | 0,242 | 0,27  | 1 |
| Ppp2r5d   | 0,190876 | -0,01488 | 0,222 | 0,252 | 1 |
| Adamts5   | 0,190913 | -0,00796 | 0,008 | 0,015 | 1 |
| Mterf1b   | 0,190961 | -0,01379 | 0,021 | 0,031 | 1 |
| Dvl1      | 0,191062 | 0,038815 | 0,324 | 0,299 | 1 |
| Phkg2     | 0,1911   | -0,0378  | 0,335 | 0,359 | 1 |
| Sdhd      | 0,191339 | -0,01497 | 0,45  | 0,499 | 1 |
| Ints10    | 0,191468 | -0,01066 | 0,224 | 0,255 | 1 |
| Map1lc3b  | 0,191492 | -0,02321 | 0,971 | 0,984 | 1 |
| Caprin1   | 0,191572 | -0,02464 | 0,721 | 0,746 | 1 |
| Cdk20     | 0,191574 | 0,023273 | 0,051 | 0,037 | 1 |
| Nefl      | 0,191642 | -0,00573 | 0,008 | 0,015 | 1 |
| Cntn2     | 0,191747 | 0,045967 | 0,995 | 0,998 | 1 |
| Chkb      | 0,191814 | -0,00952 | 0,297 | 0,338 | 1 |
| Atf5      | 0,191886 | 0,021679 | 0,257 | 0,233 | 1 |
| Aamdc     | 0,191913 | -0,02168 | 0,722 | 0,779 | 1 |
| 4930426l2 | 0,192035 | 0,031235 | 0,075 | 0,059 | 1 |
| Hmgcl     | 0,192053 | -0,02868 | 0,642 | 0,676 | 1 |
| Zfp606    | 0,192062 | -0,04026 | 0,216 | 0,241 | 1 |

|           |          |          |       |       |   |
|-----------|----------|----------|-------|-------|---|
| Fam181b   | 0,192087 | -0,0063  | 0,013 | 0,021 | 1 |
| Cep112    | 0,192132 | 0,03365  | 0,047 | 0,034 | 1 |
| Rpl4      | 0,192142 | 0,035856 | 0,983 | 0,98  | 1 |
| Ctsh      | 0,192286 | -0,00804 | 0,025 | 0,036 | 1 |
| Rnf166    | 0,192347 | 0,0352   | 0,172 | 0,148 | 1 |
| Pmepa1    | 0,192363 | 0,031939 | 0,269 | 0,239 | 1 |
| Gm47512   | 0,192544 | -0,00791 | 0,031 | 0,044 | 1 |
| Rdh12     | 0,192582 | -0,01889 | 0,095 | 0,115 | 1 |
| Thap8     | 0,192671 | -0,01134 | 0,017 | 0,026 | 1 |
| Lrrtm3    | 0,192678 | -0,01406 | 0,057 | 0,073 | 1 |
| P3h1      | 0,192699 | 0,013285 | 0,057 | 0,042 | 1 |
| Ppid      | 0,192873 | -0,04643 | 0,617 | 0,639 | 1 |
| Gtf3c6    | 0,192873 | -0,02437 | 0,426 | 0,46  | 1 |
| Ppp1r13b  | 0,192891 | 0,044049 | 0,277 | 0,252 | 1 |
| 8030462N  | 0,193327 | 0,0228   | 0,076 | 0,059 | 1 |
| Gpt2      | 0,193349 | -0,01918 | 0,275 | 0,306 | 1 |
| Gclc      | 0,193374 | -0,03067 | 0,426 | 0,459 | 1 |
| Rpap2     | 0,193381 | -0,02049 | 0,155 | 0,18  | 1 |
| Tubgcp2   | 0,193434 | 0,047154 | 0,204 | 0,18  | 1 |
| Med8      | 0,193595 | -0,03015 | 0,428 | 0,462 | 1 |
| Peli1     | 0,193679 | 0,037816 | 0,55  | 0,511 | 1 |
| Trf       | 0,193849 | -0,03373 | 1     | 1     | 1 |
| Ap1b1     | 0,194018 | -0,01867 | 0,219 | 0,25  | 1 |
| Mrpl49    | 0,194232 | -0,03028 | 0,259 | 0,286 | 1 |
| Fn3krp    | 0,194305 | -0,01855 | 0,179 | 0,207 | 1 |
| Srsf7     | 0,194432 | 0,036253 | 0,681 | 0,646 | 1 |
| Fundc1    | 0,194501 | -0,02633 | 0,399 | 0,439 | 1 |
| Tor1aip2  | 0,194599 | -0,02419 | 0,521 | 0,551 | 1 |
| Naa20     | 0,194601 | -0,03636 | 0,407 | 0,429 | 1 |
| Slc1a3    | 0,194638 | -0,05166 | 0,508 | 0,53  | 1 |
| Osbpl11   | 0,194647 | -0,02661 | 0,195 | 0,223 | 1 |
| Exoc6     | 0,194703 | -0,01593 | 0,156 | 0,182 | 1 |
| AC146911. | 0,194723 | 0,012659 | 0,059 | 0,044 | 1 |
| Ranbp10   | 0,194751 | -0,03341 | 0,219 | 0,244 | 1 |
| Oxsm      | 0,194811 | -0,01427 | 0,078 | 0,096 | 1 |
| Gm996     | 0,194875 | 0,030883 | 0,132 | 0,111 | 1 |
| P4hb      | 0,194896 | 0,057988 | 0,847 | 0,862 | 1 |
| Ntm       | 0,195041 | -0,01003 | 0,017 | 0,026 | 1 |
| Lgals1    | 0,195061 | -0,01421 | 0,021 | 0,031 | 1 |
| Klhl36    | 0,195112 | -0,00872 | 0,021 | 0,031 | 1 |
| E530011L2 | 0,195146 | -0,01052 | 0,041 | 0,055 | 1 |
| Plk3      | 0,195204 | 0,061964 | 0,346 | 0,325 | 1 |
| Nktr      | 0,195285 | -0,03964 | 0,912 | 0,937 | 1 |
| Soga1     | 0,19535  | -0,02153 | 0,234 | 0,263 | 1 |
| Pcyox1    | 0,195429 | -0,0166  | 0,465 | 0,511 | 1 |
| Sap18     | 0,195438 | 0,036772 | 0,704 | 0,689 | 1 |
| Epm2aip1  | 0,19552  | -0,04199 | 0,442 | 0,462 | 1 |
| Sesn1     | 0,196075 | -0,02847 | 0,201 | 0,228 | 1 |
| Sorbs1    | 0,196107 | -0,02794 | 0,154 | 0,177 | 1 |
| Prep      | 0,196128 | -0,01697 | 0,083 | 0,102 | 1 |
| Tcp1      | 0,196187 | 0,04287  | 0,783 | 0,784 | 1 |
| Dusp28    | 0,196264 | -0,02348 | 0,134 | 0,158 | 1 |



|          |          |          |       |       |   |
|----------|----------|----------|-------|-------|---|
| Sema3e   | 0,196313 | -0,03097 | 0,03  | 0,042 | 1 |
| Desi1    | 0,19633  | -0,04005 | 0,971 | 0,966 | 1 |
| Zscan12  | 0,196381 | -0,01687 | 0,08  | 0,099 | 1 |
| Zfp335   | 0,196703 | -0,01933 | 0,078 | 0,096 | 1 |
| Atp7a    | 0,196782 | -0,02067 | 0,171 | 0,197 | 1 |
| Mocs1    | 0,19686  | -0,02565 | 0,113 | 0,133 | 1 |
| Narfl    | 0,197029 | -0,03775 | 0,226 | 0,25  | 1 |
| S100a4   | 0,197102 | 0,016443 | 0,018 | 0,01  | 1 |
| BC065403 | 0,197102 | 0,01069  | 0,018 | 0,01  | 1 |
| Haus1    | 0,197132 | 0,024168 | 0,155 | 0,132 | 1 |
| Btg3     | 0,197134 | 0,02521  | 0,045 | 0,033 | 1 |
| Lnpep    | 0,197149 | -0,04173 | 0,626 | 0,646 | 1 |
| Zfp715   | 0,197203 | 0,017753 | 0,12  | 0,099 | 1 |
| Wwtr1    | 0,197288 | 0,012271 | 0,018 | 0,01  | 1 |
| Emb      | 0,197641 | 0,008765 | 0,018 | 0,01  | 1 |
| Gphn     | 0,197665 | -0,04363 | 0,565 | 0,587 | 1 |
| Angptl6  | 0,197814 | -0,01913 | 0,15  | 0,176 | 1 |
| Cers5    | 0,197855 | 0,036125 | 0,365 | 0,335 | 1 |
| Serpini1 | 0,197876 | -0,005   | 0,061 | 0,078 | 1 |
| Eif4a3   | 0,197982 | 0,042043 | 0,722 | 0,706 | 1 |
| Rab7b    | 0,19806  | 0,041589 | 0,16  | 0,138 | 1 |
| Gm20515  | 0,198173 | -0,03174 | 0,084 | 0,102 | 1 |
| Adal     | 0,198238 | -0,03375 | 0,123 | 0,145 | 1 |
| Elavl1   | 0,198319 | -0,04184 | 0,608 | 0,628 | 1 |
| Pgrmc1   | 0,198393 | 0,042036 | 0,725 | 0,706 | 1 |
| Cdc73    | 0,198398 | -0,0258  | 0,401 | 0,442 | 1 |
| Sntg1    | 0,198461 | -0,00162 | 0     | 0,002 | 1 |
| Kcnb2    | 0,198461 | -0,00162 | 0     | 0,002 | 1 |
| Sbspon   | 0,198461 | -0,00162 | 0     | 0,002 | 1 |
| Fhl2     | 0,198461 | -0,00162 | 0     | 0,002 | 1 |
| Dpp10    | 0,198461 | -0,00162 | 0     | 0,002 | 1 |
| Kcnt2    | 0,198461 | -0,00162 | 0     | 0,002 | 1 |
| Hlx      | 0,198461 | -0,00162 | 0     | 0,002 | 1 |
| Batf3    | 0,198461 | -0,00162 | 0     | 0,002 | 1 |
| Camk1g   | 0,198461 | -0,00162 | 0     | 0,002 | 1 |
| Fam69b   | 0,198461 | -0,00162 | 0     | 0,002 | 1 |
| Fam163b  | 0,198461 | -0,00162 | 0     | 0,002 | 1 |
| Slc43a3  | 0,198461 | -0,00162 | 0     | 0,002 | 1 |
| D430041D | 0,198461 | -0,00162 | 0     | 0,002 | 1 |
| Cd93     | 0,198461 | -0,00162 | 0     | 0,002 | 1 |
| Scrt2    | 0,198461 | -0,00162 | 0     | 0,002 | 1 |
| Hck      | 0,198461 | -0,00162 | 0     | 0,002 | 1 |
| Procr    | 0,198461 | -0,00162 | 0     | 0,002 | 1 |
| Myl9     | 0,198461 | -0,00162 | 0     | 0,002 | 1 |
| Rims4    | 0,198461 | -0,00162 | 0     | 0,002 | 1 |
| Gm27032  | 0,198461 | -0,00162 | 0     | 0,002 | 1 |
| Gpr34    | 0,198461 | -0,00162 | 0     | 0,002 | 1 |
| Akap14   | 0,198461 | -0,00162 | 0     | 0,002 | 1 |
| Tenm1    | 0,198461 | -0,00162 | 0     | 0,002 | 1 |
| Slitrk4  | 0,198461 | -0,00162 | 0     | 0,002 | 1 |
| Atp2b3   | 0,198461 | -0,00162 | 0     | 0,002 | 1 |
| Slc7a3   | 0,198461 | -0,00162 | 0     | 0,002 | 1 |

|          |          |          |   |       |   |
|----------|----------|----------|---|-------|---|
| Mum1l1   | 0,198461 | -0,00162 | 0 | 0,002 | 1 |
| Usp51    | 0,198461 | -0,00162 | 0 | 0,002 | 1 |
| Gm15261  | 0,198461 | -0,00162 | 0 | 0,002 | 1 |
| Al849053 | 0,198461 | -0,00162 | 0 | 0,002 | 1 |
| Slc6a17  | 0,198461 | -0,00162 | 0 | 0,002 | 1 |
| Npnt     | 0,198461 | -0,00162 | 0 | 0,002 | 1 |
| Dnaic1   | 0,198461 | -0,00162 | 0 | 0,002 | 1 |
| Zfp618   | 0,198461 | -0,00162 | 0 | 0,002 | 1 |
| Hacd4    | 0,198461 | -0,00162 | 0 | 0,002 | 1 |
| Kank4    | 0,198461 | -0,00162 | 0 | 0,002 | 1 |
| AB041806 | 0,198461 | -0,00162 | 0 | 0,002 | 1 |
| Vwa5b1   | 0,198461 | -0,00162 | 0 | 0,002 | 1 |
| Drc1     | 0,198461 | -0,00162 | 0 | 0,002 | 1 |
| Evc2     | 0,198461 | -0,00162 | 0 | 0,002 | 1 |
| Rbm47    | 0,198461 | -0,00162 | 0 | 0,002 | 1 |
| Adamts3  | 0,198461 | -0,00162 | 0 | 0,002 | 1 |
| Grk3     | 0,198461 | -0,00162 | 0 | 0,002 | 1 |
| lqcd     | 0,198461 | -0,00162 | 0 | 0,002 | 1 |
| Rimbp2   | 0,198461 | -0,00162 | 0 | 0,002 | 1 |
| Lrch4    | 0,198461 | -0,00162 | 0 | 0,002 | 1 |
| Gpr12    | 0,198461 | -0,00162 | 0 | 0,002 | 1 |
| Clec5a   | 0,198461 | -0,00162 | 0 | 0,002 | 1 |
| Jazf1    | 0,198461 | -0,00162 | 0 | 0,002 | 1 |
| Atoh8    | 0,198461 | -0,00162 | 0 | 0,002 | 1 |
| Nat8     | 0,198461 | -0,00162 | 0 | 0,002 | 1 |
| Tmem40   | 0,198461 | -0,00162 | 0 | 0,002 | 1 |
| 2310001H | 0,198461 | -0,00162 | 0 | 0,002 | 1 |
| Grin2b   | 0,198461 | -0,00162 | 0 | 0,002 | 1 |
| Mill2    | 0,198461 | -0,00162 | 0 | 0,002 | 1 |
| Lrfn1    | 0,198461 | -0,00162 | 0 | 0,002 | 1 |
| Cd33     | 0,198461 | -0,00162 | 0 | 0,002 | 1 |
| Cd37     | 0,198461 | -0,00162 | 0 | 0,002 | 1 |
| Fes      | 0,198461 | -0,00162 | 0 | 0,002 | 1 |
| Trim5    | 0,198461 | -0,00162 | 0 | 0,002 | 1 |
| Dkk3     | 0,198461 | -0,00162 | 0 | 0,002 | 1 |
| Sox6os   | 0,198461 | -0,00162 | 0 | 0,002 | 1 |
| B4galnt4 | 0,198461 | -0,00162 | 0 | 0,002 | 1 |
| Tnfrsf26 | 0,198461 | -0,00162 | 0 | 0,002 | 1 |
| Clvs2    | 0,198461 | -0,00162 | 0 | 0,002 | 1 |
| Fam26f   | 0,198461 | -0,00162 | 0 | 0,002 | 1 |
| Prdm1    | 0,198461 | -0,00162 | 0 | 0,002 | 1 |
| Lrrc3    | 0,198461 | -0,00162 | 0 | 0,002 | 1 |
| Icosl    | 0,198461 | -0,00162 | 0 | 0,002 | 1 |
| Mybpc1   | 0,198461 | -0,00162 | 0 | 0,002 | 1 |
| Kcnc2    | 0,198461 | -0,00162 | 0 | 0,002 | 1 |
| Gm36325  | 0,198461 | -0,00162 | 0 | 0,002 | 1 |
| Cpne7    | 0,198461 | -0,00162 | 0 | 0,002 | 1 |
| Gm3468   | 0,198461 | -0,00162 | 0 | 0,002 | 1 |
| Rarb     | 0,198461 | -0,00162 | 0 | 0,002 | 1 |
| Cfap70   | 0,198461 | -0,00162 | 0 | 0,002 | 1 |
| 1700024G | 0,198461 | -0,00162 | 0 | 0,002 | 1 |
| Nrg3     | 0,198461 | -0,00162 | 0 | 0,002 | 1 |

|           |          |          |   |       |   |
|-----------|----------|----------|---|-------|---|
| Dydc2     | 0,198461 | -0,00162 | 0 | 0,002 | 1 |
| Slitrk6   | 0,198461 | -0,00162 | 0 | 0,002 | 1 |
| Gpr183    | 0,198461 | -0,00162 | 0 | 0,002 | 1 |
| Il10ra    | 0,198461 | -0,00162 | 0 | 0,002 | 1 |
| Nrg4      | 0,198461 | -0,00162 | 0 | 0,002 | 1 |
| Calml4    | 0,198461 | -0,00162 | 0 | 0,002 | 1 |
| Car12     | 0,198461 | -0,00162 | 0 | 0,002 | 1 |
| Ripply2   | 0,198461 | -0,00162 | 0 | 0,002 | 1 |
| AF529169  | 0,198461 | -0,00162 | 0 | 0,002 | 1 |
| Cpne4     | 0,198461 | -0,00162 | 0 | 0,002 | 1 |
| Bsn       | 0,198461 | -0,00162 | 0 | 0,002 | 1 |
| Prss50    | 0,198461 | -0,00162 | 0 | 0,002 | 1 |
| Slit3     | 0,198461 | -0,00162 | 0 | 0,002 | 1 |
| Nlrp3     | 0,198461 | -0,00162 | 0 | 0,002 | 1 |
| Cfap52    | 0,198461 | -0,00162 | 0 | 0,002 | 1 |
| Pik3r6    | 0,198461 | -0,00162 | 0 | 0,002 | 1 |
| Pitpnm3   | 0,198461 | -0,00162 | 0 | 0,002 | 1 |
| Asic2     | 0,198461 | -0,00162 | 0 | 0,002 | 1 |
| Slfn8     | 0,198461 | -0,00162 | 0 | 0,002 | 1 |
| 1700023FC | 0,198461 | -0,00162 | 0 | 0,002 | 1 |
| Arhgap27o | 0,198461 | -0,00162 | 0 | 0,002 | 1 |
| Gm20554   | 0,198461 | -0,00162 | 0 | 0,002 | 1 |
| Naip5     | 0,198461 | -0,00162 | 0 | 0,002 | 1 |
| Gm9866    | 0,198461 | -0,00162 | 0 | 0,002 | 1 |
| Mirg      | 0,198461 | -0,00162 | 0 | 0,002 | 1 |
| Kif26a    | 0,198461 | -0,00162 | 0 | 0,002 | 1 |
| Mal2      | 0,198461 | -0,00162 | 0 | 0,002 | 1 |
| Lrrc6     | 0,198461 | -0,00162 | 0 | 0,002 | 1 |
| Ncf4      | 0,198461 | -0,00162 | 0 | 0,002 | 1 |
| Nfam1     | 0,198461 | -0,00162 | 0 | 0,002 | 1 |
| Tuba1c    | 0,198461 | -0,00162 | 0 | 0,002 | 1 |
| Snai2     | 0,198461 | -0,00162 | 0 | 0,002 | 1 |
| Hrasls    | 0,198461 | -0,00162 | 0 | 0,002 | 1 |
| Maats1    | 0,198461 | -0,00162 | 0 | 0,002 | 1 |
| Cd200r1   | 0,198461 | -0,00162 | 0 | 0,002 | 1 |
| Mir155hg  | 0,198461 | -0,00162 | 0 | 0,002 | 1 |
| Sh3bgr    | 0,198461 | -0,00162 | 0 | 0,002 | 1 |
| Pde9a     | 0,198461 | -0,00162 | 0 | 0,002 | 1 |
| Ptk7      | 0,198461 | -0,00162 | 0 | 0,002 | 1 |
| Gm27217   | 0,198461 | -0,00162 | 0 | 0,002 | 1 |
| Kcnh8     | 0,198461 | -0,00162 | 0 | 0,002 | 1 |
| Tgif1     | 0,198461 | -0,00162 | 0 | 0,002 | 1 |
| Galnt14   | 0,198461 | -0,00162 | 0 | 0,002 | 1 |
| Epcam     | 0,198461 | -0,00162 | 0 | 0,002 | 1 |
| Gm10308   | 0,198461 | -0,00162 | 0 | 0,002 | 1 |
| Dsg2      | 0,198461 | -0,00162 | 0 | 0,002 | 1 |
| Pcdha11   | 0,198461 | -0,00162 | 0 | 0,002 | 1 |
| Preli2    | 0,198461 | -0,00162 | 0 | 0,002 | 1 |
| Ppargc1b  | 0,198461 | -0,00162 | 0 | 0,002 | 1 |
| Syt12     | 0,198461 | -0,00162 | 0 | 0,002 | 1 |
| Slit1     | 0,198461 | -0,00162 | 0 | 0,002 | 1 |
| Neurl3    | 0,198461 | -0,00325 | 0 | 0,002 | 1 |

|           |          |          |       |       |   |
|-----------|----------|----------|-------|-------|---|
| Itga6     | 0,198461 | -0,00325 | 0     | 0,002 | 1 |
| Trpc5     | 0,198461 | -0,00325 | 0     | 0,002 | 1 |
| Gm42517   | 0,198461 | -0,00325 | 0     | 0,002 | 1 |
| Tpbgl     | 0,198461 | -0,00325 | 0     | 0,002 | 1 |
| Fam26e    | 0,198461 | -0,00325 | 0     | 0,002 | 1 |
| Gm45472   | 0,198461 | -0,00325 | 0     | 0,002 | 1 |
| Slc7a7    | 0,198461 | -0,00325 | 0     | 0,002 | 1 |
| Klhl1     | 0,198461 | -0,00325 | 0     | 0,002 | 1 |
| Acod1     | 0,198461 | -0,00325 | 0     | 0,002 | 1 |
| Cyb561    | 0,198461 | -0,00325 | 0     | 0,002 | 1 |
| Clec14a   | 0,198461 | -0,00325 | 0     | 0,002 | 1 |
| Tnf       | 0,198461 | -0,00325 | 0     | 0,002 | 1 |
| St6gal2   | 0,198461 | -0,00325 | 0     | 0,002 | 1 |
| Car6      | 0,198461 | -0,00487 | 0     | 0,002 | 1 |
| Foxp2     | 0,198461 | -0,0081  | 0     | 0,002 | 1 |
| Hikeshi   | 0,198498 | -0,02851 | 0,435 | 0,465 | 1 |
| Mapre1    | 0,1988   | 0,047335 | 0,745 | 0,717 | 1 |
| Grm3      | 0,198826 | -0,05763 | 0,56  | 0,577 | 1 |
| Mbd3      | 0,198845 | 0,026994 | 0,648 | 0,61  | 1 |
| Ufd1      | 0,198853 | 0,034547 | 0,586 | 0,567 | 1 |
| H2afv     | 0,198984 | -0,04016 | 0,649 | 0,683 | 1 |
| Mfsd8     | 0,199213 | -0,01881 | 0,258 | 0,289 | 1 |
| Nxt2      | 0,19922  | -0,02899 | 0,666 | 0,706 | 1 |
| Spop      | 0,199313 | -0,02527 | 0,774 | 0,8   | 1 |
| Gm10069   | 0,199361 | -0,00745 | 0,041 | 0,055 | 1 |
| Prepl     | 0,199388 | -0,01802 | 0,174 | 0,2   | 1 |
| Rps14     | 0,199397 | 0,024835 | 0,997 | 0,998 | 1 |
| Hes6      | 0,199447 | -0,02808 | 0,13  | 0,151 | 1 |
| Ciapin1   | 0,199688 | -0,0233  | 0,367 | 0,402 | 1 |
| 9930021JC | 0,199705 | -0,01636 | 0,581 | 0,611 | 1 |
| Rhobtb2   | 0,199782 | -0,0236  | 0,127 | 0,148 | 1 |
| Tmem28    | 0,200061 | -0,01613 | 0,116 | 0,138 | 1 |
| Gas2      | 0,200237 | -0,02525 | 0,151 | 0,174 | 1 |
| Mob1a     | 0,200271 | -0,0166  | 0,258 | 0,293 | 1 |
| Fam83d    | 0,200272 | 0,000866 | 0,025 | 0,036 | 1 |
| Klhdc2    | 0,200341 | -0,02888 | 0,566 | 0,593 | 1 |
| 3010003L2 | 0,200503 | -0,00764 | 0,027 | 0,039 | 1 |
| Cpa2      | 0,200514 | 0,028975 | 0,112 | 0,093 | 1 |
| Cinp      | 0,200521 | 0,045139 | 0,295 | 0,272 | 1 |
| Ddx39     | 0,200557 | -0,02996 | 0,165 | 0,187 | 1 |
| Cep44     | 0,200613 | -0,03076 | 0,237 | 0,265 | 1 |
| Rbm14     | 0,200694 | -0,01692 | 0,213 | 0,242 | 1 |
| Setd5     | 0,200854 | 0,084922 | 0,658 | 0,655 | 1 |
| Slc22a7   | 0,200881 | 0,010083 | 0,006 | 0,002 | 1 |
| Gpr17     | 0,200917 | 0,00077  | 0,018 | 0,01  | 1 |
| Tmem43    | 0,200954 | -0,01654 | 0,217 | 0,247 | 1 |
| Gm42997   | 0,201049 | 0,007169 | 0,006 | 0,002 | 1 |
| Car7      | 0,201049 | 0,007169 | 0,006 | 0,002 | 1 |
| Nhs       | 0,20105  | 0,009112 | 0,006 | 0,002 | 1 |
| Mbnl1     | 0,201117 | -0,03559 | 0,914 | 0,915 | 1 |
| Ophn1     | 0,201218 | 0,006195 | 0,006 | 0,002 | 1 |
| Gm26784   | 0,201218 | 0,006195 | 0,006 | 0,002 | 1 |

|           |          |          |       |       |   |
|-----------|----------|----------|-------|-------|---|
| Oacyl     | 0,201218 | 0,006195 | 0,006 | 0,002 | 1 |
| Mocos     | 0,201218 | 0,009112 | 0,006 | 0,002 | 1 |
| Wnk2      | 0,201218 | 0,007169 | 0,006 | 0,002 | 1 |
| Tbc1d24   | 0,201306 | 0,046018 | 0,204 | 0,182 | 1 |
| Nxpe3     | 0,20134  | 0,02699  | 0,218 | 0,192 | 1 |
| Tmem19    | 0,201344 | -0,02282 | 0,49  | 0,525 | 1 |
| Pigr      | 0,201386 | 0,005221 | 0,006 | 0,002 | 1 |
| Cd302     | 0,201386 | 0,005221 | 0,006 | 0,002 | 1 |
| Gm26615   | 0,201386 | 0,005221 | 0,006 | 0,002 | 1 |
| Draxin    | 0,201386 | 0,005221 | 0,006 | 0,002 | 1 |
| Styxl1    | 0,201386 | 0,005221 | 0,006 | 0,002 | 1 |
| Nr2f2     | 0,201386 | 0,005221 | 0,006 | 0,002 | 1 |
| Ttll13    | 0,201386 | 0,005221 | 0,006 | 0,002 | 1 |
| 4930405J1 | 0,201386 | 0,005221 | 0,006 | 0,002 | 1 |
| Cdca2     | 0,201386 | 0,005221 | 0,006 | 0,002 | 1 |
| Gm37401   | 0,201386 | 0,005221 | 0,006 | 0,002 | 1 |
| 9230116LC | 0,201386 | 0,005221 | 0,006 | 0,002 | 1 |
| Gm10269   | 0,201386 | 0,005221 | 0,006 | 0,002 | 1 |
| Pnlsr     | 0,201512 | -0,01763 | 0,959 | 0,966 | 1 |
| Ccdc66    | 0,20155  | -0,02455 | 0,367 | 0,403 | 1 |
| Rgs1      | 0,201554 | 0,004246 | 0,006 | 0,002 | 1 |
| Nek6      | 0,201554 | 0,004246 | 0,006 | 0,002 | 1 |
| Gm37640   | 0,201554 | 0,004246 | 0,006 | 0,002 | 1 |
| Gm26745   | 0,201554 | 0,004246 | 0,006 | 0,002 | 1 |
| Ica1      | 0,201554 | 0,004246 | 0,006 | 0,002 | 1 |
| Gpr162    | 0,201554 | 0,004246 | 0,006 | 0,002 | 1 |
| Ccdc8     | 0,201554 | 0,004246 | 0,006 | 0,002 | 1 |
| 4932443L1 | 0,201554 | 0,004246 | 0,006 | 0,002 | 1 |
| Gm45359   | 0,201554 | 0,004246 | 0,006 | 0,002 | 1 |
| 4933405L1 | 0,201554 | 0,004246 | 0,006 | 0,002 | 1 |
| Gm39302   | 0,201554 | 0,004246 | 0,006 | 0,002 | 1 |
| Trim43a   | 0,201554 | 0,004246 | 0,006 | 0,002 | 1 |
| 1700102PC | 0,201554 | 0,004246 | 0,006 | 0,002 | 1 |
| Psme2b    | 0,201554 | 0,004246 | 0,006 | 0,002 | 1 |
| Cd300lg   | 0,201554 | 0,004246 | 0,006 | 0,002 | 1 |
| Gm48250   | 0,201554 | 0,004246 | 0,006 | 0,002 | 1 |
| Gm47849   | 0,201554 | 0,004246 | 0,006 | 0,002 | 1 |
| Gm28989   | 0,201554 | 0,004246 | 0,006 | 0,002 | 1 |
| Cthrc1    | 0,201554 | 0,004246 | 0,006 | 0,002 | 1 |
| C030010L1 | 0,201554 | 0,004246 | 0,006 | 0,002 | 1 |
| Nme4      | 0,201554 | 0,004246 | 0,006 | 0,002 | 1 |
| Naif1     | 0,20158  | -0,01561 | 0,024 | 0,034 | 1 |
| Icmt      | 0,201762 | -0,01377 | 0,289 | 0,324 | 1 |
| Cyb5r3    | 0,201812 | 0,055646 | 0,318 | 0,298 | 1 |
| AW209491  | 0,201876 | 0,024579 | 0,144 | 0,122 | 1 |
| Cep57l1   | 0,201882 | 0,040815 | 0,209 | 0,185 | 1 |
| Smarca5   | 0,201937 | -0,01061 | 0,888 | 0,925 | 1 |
| Aqp5      | 0,202232 | 0,006841 | 0,006 | 0,002 | 1 |
| Uhrf1     | 0,202401 | 0,003599 | 0,006 | 0,002 | 1 |
| Casp8ap2  | 0,202532 | -0,02252 | 0,342 | 0,377 | 1 |
| Aspm      | 0,20257  | 0,002624 | 0,006 | 0,002 | 1 |
| Sigmar1   | 0,202662 | -0,02794 | 0,207 | 0,233 | 1 |

|            |          |          |       |       |   |
|------------|----------|----------|-------|-------|---|
| 18100320l  | 0,202696 | 0,018958 | 0,093 | 0,075 | 1 |
| Kctd14     | 0,202735 | 0,018293 | 0,02  | 0,011 | 1 |
| Kif3c      | 0,20279  | -0,03374 | 0,535 | 0,556 | 1 |
| Hprt       | 0,202819 | 0,017785 | 0,254 | 0,224 | 1 |
| Pdia3      | 0,203048 | 0,038599 | 0,956 | 0,954 | 1 |
| Hps1       | 0,203064 | -0,01466 | 0,089 | 0,109 | 1 |
| Slc6a8     | 0,203156 | 0,062041 | 0,644 | 0,633 | 1 |
| Zfp959     | 0,203176 | -0,01493 | 0,075 | 0,093 | 1 |
| Car5b      | 0,203266 | -0,01248 | 0,024 | 0,034 | 1 |
| Rpf2       | 0,203465 | -0,03167 | 0,217 | 0,244 | 1 |
| Mtrr       | 0,203537 | -0,02187 | 0,141 | 0,164 | 1 |
| Mllt6      | 0,203557 | 0,033149 | 0,451 | 0,42  | 1 |
| Supt6      | 0,203647 | 0,039515 | 0,611 | 0,58  | 1 |
| Paxx       | 0,20368  | 0,027546 | 0,605 | 0,566 | 1 |
| Rlim       | 0,20378  | -0,02494 | 0,5   | 0,528 | 1 |
| Micu2      | 0,203783 | 0,040883 | 0,501 | 0,48  | 1 |
| Blcap      | 0,203875 | -0,02489 | 0,297 | 0,328 | 1 |
| Csgalnact2 | 0,204077 | -0,01545 | 0,19  | 0,218 | 1 |
| Slc37a4    | 0,204079 | -0,0284  | 0,159 | 0,182 | 1 |
| Scfd1      | 0,204133 | 0,045488 | 0,442 | 0,416 | 1 |
| Ltbr       | 0,204134 | -0,01293 | 0,148 | 0,174 | 1 |
| Atp8b1     | 0,204207 | 0,021646 | 0,244 | 0,218 | 1 |
| Recql      | 0,20421  | -0,03027 | 0,187 | 0,211 | 1 |
| Gm10277    | 0,204236 | -0,01609 | 0,056 | 0,072 | 1 |
| Akt1       | 0,204315 | 0,0355   | 0,441 | 0,408 | 1 |
| Edil3      | 0,204546 | -0,01064 | 0,998 | 1     | 1 |
| Trappc6a   | 0,204567 | -0,01559 | 0,304 | 0,34  | 1 |
| Nedd4l     | 0,20463  | 0,028078 | 0,354 | 0,317 | 1 |
| Fam13a     | 0,204814 | -0,02488 | 0,049 | 0,063 | 1 |
| Zfp964     | 0,204822 | 0,010355 | 0,02  | 0,011 | 1 |
| Atp11a     | 0,20487  | -0,02722 | 0,83  | 0,855 | 1 |
| Kcnrg      | 0,204883 | -0,0206  | 0,043 | 0,057 | 1 |
| Gm32926    | 0,204895 | -0,01091 | 0,024 | 0,034 | 1 |
| Dnmt3a     | 0,205    | 0,042058 | 0,631 | 0,611 | 1 |
| Pomgnt1    | 0,205046 | 0,041391 | 0,513 | 0,489 | 1 |
| Ptpn4      | 0,205116 | -0,03586 | 0,221 | 0,246 | 1 |
| Ppp2r1a    | 0,205126 | -0,03971 | 0,854 | 0,859 | 1 |
| Pcdhb14    | 0,205251 | 0,042987 | 0,097 | 0,08  | 1 |
| Dohh       | 0,205252 | -0,02662 | 0,416 | 0,455 | 1 |
| Pdxk       | 0,205288 | 0,046656 | 0,307 | 0,281 | 1 |
| Capn12     | 0,205346 | 0,010355 | 0,02  | 0,011 | 1 |
| Arid3b     | 0,205426 | 0,017956 | 0,079 | 0,062 | 1 |
| Mri1       | 0,205477 | 0,018399 | 0,139 | 0,117 | 1 |
| Rpap1      | 0,20555  | -0,00953 | 0,147 | 0,171 | 1 |
| Wdfy1      | 0,205654 | -0,00788 | 0,446 | 0,491 | 1 |
| Tspan4     | 0,205731 | -0,01556 | 0,03  | 0,042 | 1 |
| Washc2     | 0,20583  | 0,044538 | 0,91  | 0,872 | 1 |
| Gm26944    | 0,206047 | 0,008436 | 0,02  | 0,011 | 1 |
| AC174678.  | 0,206181 | -0,01045 | 0,012 | 0,02  | 1 |
| Ube2k      | 0,206182 | -0,03866 | 0,677 | 0,688 | 1 |
| Rabep2     | 0,206421 | -0,01861 | 0,152 | 0,177 | 1 |
| Gtf2h3     | 0,206501 | -0,01642 | 0,148 | 0,172 | 1 |

|           |          |          |       |       |   |
|-----------|----------|----------|-------|-------|---|
| Tmem108   | 0,206509 | -0,03243 | 0,342 | 0,374 | 1 |
| Camsap1   | 0,206529 | -0,0212  | 0,278 | 0,309 | 1 |
| Sun2      | 0,206537 | 0,061441 | 0,354 | 0,335 | 1 |
| Krtcap2   | 0,206657 | -0,03495 | 0,821 | 0,821 | 1 |
| Atp1b3    | 0,206671 | 0,057911 | 0,994 | 0,997 | 1 |
| Pcdhga10  | 0,206721 | -0,02039 | 0,043 | 0,057 | 1 |
| Tusc1     | 0,206747 | 0,020362 | 0,06  | 0,046 | 1 |
| Mcm8      | 0,206925 | -0,0264  | 0,096 | 0,115 | 1 |
| 7630403G  | 0,207095 | 0,010713 | 0,011 | 0,005 | 1 |
| Kctd12    | 0,207095 | 0,012644 | 0,011 | 0,005 | 1 |
| Ifnar2    | 0,207162 | -0,02495 | 0,374 | 0,413 | 1 |
| Plscr3    | 0,207232 | 0,020235 | 0,146 | 0,124 | 1 |
| Gm17705   | 0,207276 | 0,006513 | 0,02  | 0,011 | 1 |
| Grid2     | 0,207402 | -0,02074 | 0,298 | 0,333 | 1 |
| Dhx30     | 0,207409 | -0,01671 | 0,484 | 0,524 | 1 |
| Slc16a10  | 0,207461 | 0,011679 | 0,011 | 0,005 | 1 |
| Ythdc2    | 0,207556 | -0,03808 | 0,321 | 0,348 | 1 |
| Ube4b     | 0,207676 | -0,0137  | 0,421 | 0,463 | 1 |
| C1qa      | 0,207769 | 0,015852 | 0,047 | 0,034 | 1 |
| Gm26563   | 0,207812 | 0,006832 | 0,02  | 0,011 | 1 |
| Speer4b   | 0,207827 | 0,008779 | 0,011 | 0,005 | 1 |
| Lgr5      | 0,207827 | 0,009747 | 0,011 | 0,005 | 1 |
| Angptl2   | 0,207829 | 0,011991 | 0,011 | 0,005 | 1 |
| Rcn1      | 0,207855 | -0,00671 | 0,007 | 0,013 | 1 |
| Mblac2    | 0,207915 | -0,04167 | 0,295 | 0,324 | 1 |
| Gm13403   | 0,208109 | -0,01296 | 0,083 | 0,102 | 1 |
| Clasp1    | 0,208128 | -0,02508 | 0,19  | 0,218 | 1 |
| Sft2d3    | 0,208163 | -0,03251 | 0,371 | 0,402 | 1 |
| Rps8      | 0,208175 | 0,034812 | 1     | 1     | 1 |
| Ropn1l    | 0,208194 | 0,007811 | 0,011 | 0,005 | 1 |
| Gas1      | 0,208194 | 0,009747 | 0,011 | 0,005 | 1 |
| Vsig10    | 0,208199 | 0,016243 | 0,041 | 0,029 | 1 |
| Pskh1     | 0,208309 | -0,02292 | 0,142 | 0,166 | 1 |
| H2-M5     | 0,208441 | 0,009097 | 0,011 | 0,005 | 1 |
| Rfxap     | 0,208506 | -0,02201 | 0,359 | 0,392 | 1 |
| Hdac5     | 0,208541 | 0,046267 | 0,724 | 0,704 | 1 |
| Rbm8a2    | 0,20856  | 0,006841 | 0,011 | 0,005 | 1 |
| Morn5     | 0,20856  | 0,006841 | 0,011 | 0,005 | 1 |
| Olfr539   | 0,20856  | 0,006841 | 0,011 | 0,005 | 1 |
| Gabrb1    | 0,208682 | -0,0051  | 0,007 | 0,013 | 1 |
| Fmr1      | 0,208712 | 0,049574 | 0,632 | 0,603 | 1 |
| Cbl1      | 0,208789 | 0,028627 | 0,358 | 0,327 | 1 |
| Ano1      | 0,208803 | -0,00573 | 0,007 | 0,013 | 1 |
| Mcm4      | 0,208902 | 0,032468 | 0,206 | 0,182 | 1 |
| Agbl2     | 0,208927 | 0,005871 | 0,011 | 0,005 | 1 |
| Mansc1    | 0,208927 | 0,005871 | 0,011 | 0,005 | 1 |
| Gm12324   | 0,20895  | -0,02188 | 0,052 | 0,067 | 1 |
| Lrrc8a    | 0,209171 | 0,03324  | 0,182 | 0,159 | 1 |
| 2510017J1 | 0,209211 | 0,022789 | 0,039 | 0,028 | 1 |
| Cox15     | 0,209259 | -0,01593 | 0,156 | 0,18  | 1 |
| Fgf22     | 0,209322 | -0,01997 | 0,132 | 0,154 | 1 |
| Sptssa    | 0,209524 | -0,01679 | 0,852 | 0,872 | 1 |

|           |          |          |       |       |   |
|-----------|----------|----------|-------|-------|---|
| Olfr639   | 0,209545 | 0,006194 | 0,011 | 0,005 | 1 |
| Cgref1    | 0,209634 | -0,00122 | 0,007 | 0,013 | 1 |
| Pias3     | 0,209644 | -0,02495 | 0,182 | 0,208 | 1 |
| Prkar2b   | 0,209668 | 0,010978 | 0,022 | 0,013 | 1 |
| Cry2      | 0,209705 | 0,045847 | 0,286 | 0,263 | 1 |
| Rpl22     | 0,20971  | 0,037409 | 0,974 | 0,969 | 1 |
| Plekhb2   | 0,209925 | 0,021138 | 0,364 | 0,33  | 1 |
| Zfp703    | 0,210053 | 0,037711 | 0,099 | 0,081 | 1 |
| Zfp469    | 0,210166 | 0,012271 | 0,022 | 0,013 | 1 |
| Fam205a1  | 0,210166 | 0,009396 | 0,022 | 0,013 | 1 |
| Ints11    | 0,210179 | 0,019045 | 0,198 | 0,172 | 1 |
| Atp6v0a2  | 0,210187 | -0,04236 | 0,499 | 0,525 | 1 |
| Atxn1     | 0,210289 | 0,064323 | 0,327 | 0,301 | 1 |
| Guk1      | 0,210299 | -0,02375 | 0,636 | 0,676 | 1 |
| Ppp1r9b   | 0,21033  | -0,04446 | 0,445 | 0,467 | 1 |
| Diaph3    | 0,210433 | -0,00811 | 0,02  | 0,029 | 1 |
| Chchd7    | 0,21055  | 0,059701 | 0,403 | 0,39  | 1 |
| Spc24     | 0,210596 | 0,010667 | 0,022 | 0,013 | 1 |
| Ccl22     | 0,210681 | 0,00971  | 0,022 | 0,013 | 1 |
| Slc9a3r1  | 0,210854 | -0,0473  | 0,256 | 0,281 | 1 |
| Msl2      | 0,210881 | -0,01937 | 0,376 | 0,403 | 1 |
| Arhgef18  | 0,210947 | -0,02383 | 0,146 | 0,169 | 1 |
| Hist1h1c  | 0,210997 | 0,002822 | 0,184 | 0,211 | 1 |
| Pcdhgc3   | 0,211035 | -0,01134 | 0,016 | 0,024 | 1 |
| Wars      | 0,211161 | -0,03062 | 0,32  | 0,351 | 1 |
| Hace1     | 0,211281 | -0,04175 | 0,247 | 0,27  | 1 |
| Rnf31     | 0,211406 | 0,021796 | 0,204 | 0,177 | 1 |
| Nupr1l    | 0,211443 | 0,008108 | 0,022 | 0,013 | 1 |
| 25100390  | 0,211529 | -0,00525 | 0,343 | 0,384 | 1 |
| Crmp1     | 0,211826 | -0,01158 | 0,075 | 0,093 | 1 |
| 4931428FC | 0,21185  | 0,015669 | 0,064 | 0,049 | 1 |
| Cdc42bpb  | 0,211867 | -0,04525 | 0,348 | 0,377 | 1 |
| Dstyk     | 0,211948 | -0,04307 | 0,761 | 0,774 | 1 |
| Psmc1     | 0,212028 | -0,00616 | 0,782 | 0,818 | 1 |
| Fasn      | 0,212046 | 0,036432 | 0,874 | 0,873 | 1 |
| Ubp1      | 0,212095 | -0,03445 | 0,409 | 0,434 | 1 |
| Trim65    | 0,212166 | -0,01174 | 0,072 | 0,089 | 1 |
| Fam213a   | 0,212254 | 0,05197  | 0,662 | 0,67  | 1 |
| Gxylt1    | 0,212313 | 0,053217 | 0,349 | 0,324 | 1 |
| Ppil2     | 0,212447 | -0,02003 | 0,561 | 0,593 | 1 |
| Tbc1d8b   | 0,212508 | -0,01968 | 0,055 | 0,07  | 1 |
| Crybg2    | 0,212841 | 0,020997 | 0,056 | 0,042 | 1 |
| Zfp446    | 0,21303  | -0,01053 | 0,122 | 0,145 | 1 |
| Gde1      | 0,213034 | -0,04586 | 0,918 | 0,924 | 1 |
| 11100020l | 0,213237 | 0,00715  | 0,022 | 0,013 | 1 |
| Usp9x     | 0,213537 | -0,00864 | 0,855 | 0,87  | 1 |
| Mrps5     | 0,213609 | 0,031498 | 0,461 | 0,436 | 1 |
| Nhsl1     | 0,213676 | -0,01467 | 0,043 | 0,057 | 1 |
| Kndc1     | 0,213968 | -0,04559 | 0,822 | 0,815 | 1 |
| Cdk2ap2   | 0,214066 | -0,03205 | 0,428 | 0,463 | 1 |
| Kazn      | 0,214107 | 0,05331  | 0,92  | 0,907 | 1 |
| Tmem199   | 0,214131 | -0,02217 | 0,37  | 0,403 | 1 |



|            |          |          |       |       |   |
|------------|----------|----------|-------|-------|---|
| Nudt4      | 0,214194 | -0,04256 | 0,669 | 0,699 | 1 |
| Speer4a    | 0,214277 | -0,01383 | 0,043 | 0,057 | 1 |
| Gm26609    | 0,214479 | 0,020994 | 0,033 | 0,023 | 1 |
| H2-Q4      | 0,214567 | -0,14444 | 0,081 | 0,098 | 1 |
| Slc1a5     | 0,214602 | 0,012722 | 0,041 | 0,029 | 1 |
| Atox1      | 0,214648 | -0,01814 | 0,79  | 0,824 | 1 |
| Morc4      | 0,214785 | -0,01388 | 0,068 | 0,085 | 1 |
| Ccdc47     | 0,214887 | -0,01277 | 0,916 | 0,911 | 1 |
| Klhl20     | 0,214934 | -0,00982 | 0,187 | 0,216 | 1 |
| Hemk1      | 0,214948 | -0,02324 | 0,092 | 0,111 | 1 |
| Mto1       | 0,215069 | -0,02319 | 0,184 | 0,208 | 1 |
| Gm26682    | 0,215202 | -0,00508 | 0,03  | 0,042 | 1 |
| A930028Nl  | 0,215297 | -0,01147 | 0,059 | 0,075 | 1 |
| Spata6     | 0,215404 | -0,01628 | 0,105 | 0,125 | 1 |
| Ramp1      | 0,215405 | -0,01102 | 0,033 | 0,046 | 1 |
| Rpl9-ps6   | 0,215493 | 0,011211 | 0,041 | 0,029 | 1 |
| Stx16      | 0,215538 | 0,035666 | 0,619 | 0,587 | 1 |
| Cbr1       | 0,215552 | -0,02787 | 0,269 | 0,298 | 1 |
| Gfod1      | 0,215648 | -0,0301  | 0,117 | 0,137 | 1 |
| Ccnl2      | 0,215942 | -0,0003  | 0,772 | 0,803 | 1 |
| Malt1      | 0,216001 | -0,02319 | 0,16  | 0,182 | 1 |
| Creg2      | 0,21605  | -0,02127 | 0,166 | 0,19  | 1 |
| Sp2        | 0,216142 | 0,035318 | 0,255 | 0,231 | 1 |
| Fam53c     | 0,216163 | -0,02841 | 0,324 | 0,354 | 1 |
| B3gnt9     | 0,216246 | 0,037394 | 0,423 | 0,397 | 1 |
| Map2k4     | 0,216429 | 0,024    | 0,281 | 0,252 | 1 |
| Srsf10     | 0,216449 | 0,024229 | 0,63  | 0,585 | 1 |
| Xlr3b      | 0,216527 | 0,01505  | 0,026 | 0,016 | 1 |
| Ivns1abp   | 0,216535 | -0,01017 | 0,455 | 0,501 | 1 |
| Gid4       | 0,216738 | 0,02887  | 0,395 | 0,359 | 1 |
| Mthfd2l    | 0,217025 | 0,027947 | 0,101 | 0,083 | 1 |
| Ipo4       | 0,217229 | -0,01883 | 0,169 | 0,193 | 1 |
| Ppard      | 0,217234 | -0,02719 | 0,241 | 0,268 | 1 |
| Satb1      | 0,217346 | -0,0287  | 0,115 | 0,135 | 1 |
| Zfp113     | 0,217384 | -0,01558 | 0,161 | 0,185 | 1 |
| Rab8a      | 0,217447 | -0,02774 | 0,381 | 0,413 | 1 |
| Zfp644     | 0,217516 | -0,02027 | 0,71  | 0,715 | 1 |
| Slco2b1    | 0,217518 | 0,014326 | 0,037 | 0,026 | 1 |
| Galk2      | 0,21754  | -0,02096 | 0,116 | 0,137 | 1 |
| Fbxo6      | 0,217565 | 0,027611 | 0,181 | 0,158 | 1 |
| Gabbr1     | 0,217566 | 0,03141  | 0,974 | 0,971 | 1 |
| Gtf2f2     | 0,217628 | -0,02739 | 0,283 | 0,307 | 1 |
| Pank1      | 0,217649 | -0,01526 | 0,052 | 0,067 | 1 |
| Golga4     | 0,217719 | -0,01015 | 0,614 | 0,646 | 1 |
| Ago1       | 0,217796 | -0,03003 | 0,41  | 0,437 | 1 |
| Ctnnb1     | 0,217821 | 0,064381 | 0,831 | 0,802 | 1 |
| Vps52      | 0,21785  | -0,02807 | 0,389 | 0,42  | 1 |
| Scrg1      | 0,21807  | -0,02026 | 0,045 | 0,059 | 1 |
| Baz1a      | 0,218264 | 0,014707 | 0,029 | 0,02  | 1 |
| D3Erttd254 | 0,218401 | -0,01694 | 0,138 | 0,163 | 1 |
| Zfyve16    | 0,218534 | -0,03481 | 0,306 | 0,337 | 1 |
| Myrip      | 0,218855 | -0,01315 | 0,153 | 0,177 | 1 |

|           |          |          |       |       |   |
|-----------|----------|----------|-------|-------|---|
| Med19     | 0,218902 | -0,02006 | 0,42  | 0,455 | 1 |
| Knstrn    | 0,219016 | 0,011262 | 0,031 | 0,021 | 1 |
| Cblb      | 0,219029 | -0,03071 | 0,234 | 0,259 | 1 |
| Zfp81     | 0,219092 | -0,03331 | 0,155 | 0,177 | 1 |
| Eri1      | 0,219242 | -0,01737 | 0,276 | 0,306 | 1 |
| Sfxn5     | 0,219365 | -0,01523 | 0,156 | 0,18  | 1 |
| Mmab      | 0,219503 | 0,019869 | 0,114 | 0,094 | 1 |
| Ube2o     | 0,219556 | -0,02338 | 0,311 | 0,34  | 1 |
| 573040310 | 0,2198   | -0,01395 | 0,029 | 0,041 | 1 |
| Slbp      | 0,219911 | 0,035837 | 0,26  | 0,234 | 1 |
| Tmem203   | 0,220017 | -0,02526 | 0,204 | 0,231 | 1 |
| Acad11    | 0,220205 | -0,00233 | 0,155 | 0,182 | 1 |
| Zfp488    | 0,220244 | -0,01508 | 0,074 | 0,091 | 1 |
| Etfrf1    | 0,22033  | 0,032218 | 0,343 | 0,314 | 1 |
| Tjap1     | 0,220337 | 0,037966 | 0,443 | 0,415 | 1 |
| Snx18     | 0,220343 | -0,03209 | 0,473 | 0,511 | 1 |
| Rufy1     | 0,220463 | 0,024853 | 0,543 | 0,509 | 1 |
| Pde1c     | 0,220517 | -0,06572 | 0,299 | 0,325 | 1 |
| Commd3    | 0,22061  | -0,02851 | 0,693 | 0,74  | 1 |
| Ntrk2     | 0,220849 | -0,02502 | 0,042 | 0,055 | 1 |
| Gpr180    | 0,22091  | -0,01023 | 0,194 | 0,223 | 1 |
| Spata2    | 0,220966 | 0,038568 | 0,476 | 0,455 | 1 |
| Usp39     | 0,22098  | -0,03017 | 0,222 | 0,247 | 1 |
| Txnrd2    | 0,220988 | -0,03247 | 0,167 | 0,189 | 1 |
| Grk4      | 0,22104  | -0,00984 | 0,091 | 0,111 | 1 |
| Nup88     | 0,221069 | -0,01995 | 0,347 | 0,38  | 1 |
| Pigq      | 0,221118 | -0,01601 | 0,716 | 0,761 | 1 |
| Mtmr4     | 0,221218 | -0,01505 | 0,311 | 0,346 | 1 |
| Ctns      | 0,221305 | -0,00435 | 0,142 | 0,167 | 1 |
| Eef1g     | 0,221398 | 0,050091 | 0,879 | 0,842 | 1 |
| Pnrc2     | 0,221821 | -0,02277 | 0,428 | 0,462 | 1 |
| Lym4      | 0,221826 | -0,02184 | 0,148 | 0,171 | 1 |
| Gtf2e2    | 0,221902 | 0,034574 | 0,263 | 0,239 | 1 |
| Rtraf     | 0,222152 | -0,03012 | 0,798 | 0,839 | 1 |
| Zbtb21    | 0,222202 | 0,03229  | 0,212 | 0,187 | 1 |
| Krit1     | 0,222214 | -0,01286 | 0,793 | 0,828 | 1 |
| Rps29     | 0,222337 | 0,02763  | 1     | 1     | 1 |
| Ube2z     | 0,222424 | -0,02765 | 0,319 | 0,348 | 1 |
| Zfp672    | 0,222648 | -0,00873 | 0,241 | 0,273 | 1 |
| Nat14     | 0,222748 | 0,025318 | 0,086 | 0,07  | 1 |
| Ppp1r16a  | 0,222853 | 0,047484 | 0,301 | 0,281 | 1 |
| 4930452G  | 0,22289  | 0,00902  | 0,035 | 0,024 | 1 |
| Gm38414   | 0,222902 | -0,00641 | 0,026 | 0,037 | 1 |
| Ehd2      | 0,222998 | 0,019792 | 0,052 | 0,039 | 1 |
| Angel1    | 0,223025 | 0,021957 | 0,097 | 0,08  | 1 |
| Maip1     | 0,223216 | -0,03091 | 0,229 | 0,254 | 1 |
| Dcun1d5   | 0,223481 | -0,03031 | 0,438 | 0,478 | 1 |
| Thap7     | 0,223564 | -0,02615 | 0,239 | 0,267 | 1 |
| Nbdy      | 0,223672 | -0,02418 | 0,159 | 0,182 | 1 |
| BC022687  | 0,223731 | -0,01615 | 0,042 | 0,055 | 1 |
| Cdk16     | 0,223815 | 0,024392 | 0,547 | 0,504 | 1 |
| Ado       | 0,223892 | -0,02358 | 0,98  | 0,99  | 1 |

|           |          |          |       |       |   |
|-----------|----------|----------|-------|-------|---|
| Zfp704    | 0,224031 | 0,022218 | 0,579 | 0,53  | 1 |
| Zfp973    | 0,224078 | 0,012063 | 0,056 | 0,042 | 1 |
| Ndufa11   | 0,22408  | -0,02774 | 0,844 | 0,881 | 1 |
| Rbmx      | 0,224237 | -0,02014 | 0,496 | 0,528 | 1 |
| Med12     | 0,224339 | -0,01875 | 0,183 | 0,208 | 1 |
| Tax1bp3   | 0,22446  | -0,01507 | 0,193 | 0,22  | 1 |
| Klhl11    | 0,22451  | -0,01651 | 0,113 | 0,133 | 1 |
| Klhl28    | 0,224542 | -0,02245 | 0,335 | 0,363 | 1 |
| Hoxa3     | 0,224692 | 0,014803 | 0,118 | 0,098 | 1 |
| Glrx5     | 0,224787 | -0,02217 | 0,439 | 0,47  | 1 |
| Izumo4    | 0,22479  | 0,043741 | 0,317 | 0,294 | 1 |
| Ttc39b    | 0,224945 | -0,00804 | 0,023 | 0,033 | 1 |
| Chd1l     | 0,225053 | -0,02596 | 0,153 | 0,176 | 1 |
| Cdc37     | 0,22508  | 0,038296 | 0,852 | 0,837 | 1 |
| Naa35     | 0,225127 | -0,0249  | 0,388 | 0,418 | 1 |
| 4930509G  | 0,225293 | 0,02021  | 0,048 | 0,036 | 1 |
| Pmf1      | 0,225297 | -0,02251 | 0,075 | 0,091 | 1 |
| Lonrf1    | 0,225328 | -0,01884 | 0,297 | 0,328 | 1 |
| Cybrd1    | 0,225332 | -0,00705 | 0,006 | 0,011 | 1 |
| Gm48908   | 0,225332 | -0,01026 | 0,006 | 0,011 | 1 |
| Trip11    | 0,225352 | -0,03495 | 0,764 | 0,753 | 1 |
| Zfp410    | 0,225561 | -0,01364 | 0,289 | 0,322 | 1 |
| Arpin     | 0,225574 | -0,01594 | 0,136 | 0,159 | 1 |
| Rapgef1   | 0,225815 | 0,013916 | 0,013 | 0,007 | 1 |
| Aars2     | 0,226056 | 0,01366  | 0,094 | 0,076 | 1 |
| Ndufb2    | 0,226093 | -0,02513 | 0,856 | 0,873 | 1 |
| Gm40437   | 0,226139 | -0,00545 | 0,006 | 0,011 | 1 |
| Hoxc8     | 0,226167 | -0,0108  | 0,011 | 0,018 | 1 |
| Hdac4     | 0,226224 | -0,02822 | 0,312 | 0,34  | 1 |
| Spef2     | 0,226278 | 0,001064 | 0,105 | 0,127 | 1 |
| Gm26625   | 0,226411 | -0,0051  | 0,006 | 0,011 | 1 |
| Kif13a    | 0,226611 | -0,04226 | 0,674 | 0,68  | 1 |
| Rcctb2    | 0,226709 | -0,01397 | 0,07  | 0,086 | 1 |
| Gm13919   | 0,226759 | 0,00813  | 0,013 | 0,007 | 1 |
| Slc35d2   | 0,226759 | 0,00813  | 0,013 | 0,007 | 1 |
| Ppp2r1b   | 0,226786 | -0,02986 | 0,143 | 0,164 | 1 |
| Zfp825    | 0,226796 | -0,01569 | 0,093 | 0,112 | 1 |
| Slk       | 0,226828 | 0,058282 | 0,738 | 0,735 | 1 |
| Pcdha11.1 | 0,227086 | -0,00447 | 0,006 | 0,011 | 1 |
| Lfng      | 0,227117 | 0,01134  | 0,013 | 0,007 | 1 |
| Gm26935   | 0,22714  | -0,01333 | 0,042 | 0,055 | 1 |
| Slc35f1   | 0,227223 | -0,0051  | 0,006 | 0,011 | 1 |
| Epb41     | 0,227237 | 0,017398 | 0,013 | 0,007 | 1 |
| Gja1      | 0,227308 | -0,00859 | 0,011 | 0,018 | 1 |
| 1700037H  | 0,227392 | -0,01493 | 0,081 | 0,099 | 1 |
| Kdm6a     | 0,227441 | 0,063402 | 0,59  | 0,574 | 1 |
| Rab36     | 0,227466 | -0,01485 | 0,015 | 0,023 | 1 |
| Rnf128    | 0,227493 | -0,00122 | 0,006 | 0,011 | 1 |
| Hsf5      | 0,227537 | -0,02173 | 0,066 | 0,081 | 1 |
| Repin1    | 0,227696 | -0,00981 | 0,12  | 0,141 | 1 |
| Clec16a   | 0,227699 | -0,02319 | 0,229 | 0,254 | 1 |
| Gm26884   | 0,227709 | 0,010377 | 0,013 | 0,007 | 1 |

|          |          |          |       |       |   |
|----------|----------|----------|-------|-------|---|
| Smco4    | 0,227709 | 0,008448 | 0,013 | 0,007 | 1 |
| Tbc1d10b | 0,227713 | 0,069733 | 0,767 | 0,793 | 1 |
| Cyb5rl   | 0,22773  | 0,014837 | 0,054 | 0,041 | 1 |
| Gm38910  | 0,227765 | -0,00573 | 0,006 | 0,011 | 1 |
| Smarcd3  | 0,227906 | -0,00683 | 0,169 | 0,195 | 1 |
| Megf8    | 0,227935 | 0,05353  | 0,22  | 0,2   | 1 |
| Chuk     | 0,228036 | -0,02861 | 0,513 | 0,545 | 1 |
| Sh3pxd2a | 0,228065 | 0,006837 | 0,013 | 0,007 | 1 |
| Gm26532  | 0,228079 | 0,02378  | 0,054 | 0,041 | 1 |
| Rps12    | 0,228147 | 0,037837 | 0,991 | 0,99  | 1 |
| Bptf     | 0,228208 | 0,042582 | 0,879 | 0,885 | 1 |
| Klf7     | 0,228246 | 0,058038 | 0,873 | 0,865 | 1 |
| Gm12981  | 0,228302 | 0,006516 | 0,013 | 0,007 | 1 |
| Atxn2    | 0,228325 | -0,02099 | 0,741 | 0,763 | 1 |
| Serf2    | 0,228327 | -0,01966 | 0,994 | 0,998 | 1 |
| Tsr3     | 0,228377 | 0,031903 | 0,297 | 0,273 | 1 |
| Abhd10   | 0,22846  | -0,01924 | 0,19  | 0,216 | 1 |
| Pdzd9    | 0,22846  | -0,00824 | 0,011 | 0,018 | 1 |
| Tomm20   | 0,228473 | -0,01996 | 0,924 | 0,925 | 1 |
| Pqlc1    | 0,228538 | -0,01126 | 0,019 | 0,028 | 1 |
| Ubl5     | 0,22856  | -0,02751 | 0,951 | 0,95  | 1 |
| Mlxip    | 0,228778 | -0,01507 | 0,179 | 0,205 | 1 |
| Nt5dc1   | 0,228779 | -0,00596 | 0,036 | 0,049 | 1 |
| Dhrs7b   | 0,228842 | -0,03774 | 0,369 | 0,393 | 1 |
| Tmem59l  | 0,228916 | 0,0374   | 0,219 | 0,197 | 1 |
| Gm42500  | 0,228974 | -0,03716 | 0,184 | 0,207 | 1 |
| Snta1    | 0,229191 | -0,0183  | 0,225 | 0,254 | 1 |
| Cdk14    | 0,229213 | -0,00541 | 0,112 | 0,133 | 1 |
| Srgap1   | 0,229454 | 0,054257 | 0,416 | 0,395 | 1 |
| Zfp661   | 0,22949  | -0,01601 | 0,035 | 0,047 | 1 |
| Hsp90ab1 | 0,229493 | 0,014583 | 0,999 | 1     | 1 |
| Tatdn2   | 0,229599 | -0,01298 | 0,195 | 0,223 | 1 |
| Slc46a1  | 0,229612 | -0,00602 | 0,011 | 0,018 | 1 |
| Ddc      | 0,22973  | 0,062618 | 0,391 | 0,366 | 1 |
| Ssh2     | 0,22994  | -0,04083 | 0,459 | 0,488 | 1 |
| Mdn1     | 0,229978 | -0,00867 | 0,267 | 0,298 | 1 |
| Impdh2   | 0,230278 | -0,02529 | 0,41  | 0,447 | 1 |
| Fan1     | 0,230293 | -0,04745 | 0,201 | 0,224 | 1 |
| H3f3a    | 0,230419 | 0,029408 | 1     | 0,995 | 1 |
| Eif3d    | 0,230572 | -0,01634 | 0,668 | 0,709 | 1 |
| Pcdhgb7  | 0,230593 | -0,0077  | 0,023 | 0,033 | 1 |
| Fam43a   | 0,230892 | -0,02642 | 0,063 | 0,078 | 1 |
| Ermard   | 0,231009 | -0,02084 | 0,236 | 0,263 | 1 |
| Dusp5    | 0,23105  | 0,000416 | 0,013 | 0,007 | 1 |
| Limk2    | 0,231079 | -0,0222  | 0,277 | 0,311 | 1 |
| Midn     | 0,231295 | 0,040362 | 0,057 | 0,044 | 1 |
| Tyk2     | 0,231386 | 0,025929 | 0,126 | 0,106 | 1 |
| Klf16    | 0,231424 | 0,018072 | 0,097 | 0,08  | 1 |
| Mhrt     | 0,231503 | -0,00845 | 0,019 | 0,028 | 1 |
| Peli2    | 0,231508 | -0,03147 | 0,393 | 0,421 | 1 |
| Pcbp1    | 0,231612 | 0,024299 | 0,938 | 0,933 | 1 |
| Gm39121  | 0,231897 | -0,01684 | 0,075 | 0,091 | 1 |

|          |          |          |       |       |   |
|----------|----------|----------|-------|-------|---|
| Gm16141  | 0,232101 | -0,01231 | 0,045 | 0,059 | 1 |
| Pja2     | 0,232115 | -0,03063 | 0,793 | 0,798 | 1 |
| Zfp821   | 0,232139 | -0,00714 | 0,169 | 0,195 | 1 |
| Alms1    | 0,232431 | 0,035191 | 0,066 | 0,052 | 1 |
| Zfp729a  | 0,232562 | -0,0181  | 0,266 | 0,299 | 1 |
| Sp3      | 0,232649 | -0,0253  | 0,493 | 0,535 | 1 |
| Ubqln4   | 0,232671 | 0,035146 | 0,219 | 0,197 | 1 |
| Tbc1d22b | 0,23274  | -0,02775 | 0,267 | 0,293 | 1 |
| Zfp11    | 0,232833 | -0,02098 | 0,349 | 0,379 | 1 |
| Zfp386   | 0,232953 | -0,02341 | 0,213 | 0,239 | 1 |
| Snapin   | 0,232964 | 0,022878 | 0,854 | 0,852 | 1 |
| Whrn     | 0,232987 | -0,00946 | 0,029 | 0,041 | 1 |
| Dpp7     | 0,233068 | 0,043728 | 0,228 | 0,207 | 1 |
| Zranb2   | 0,233188 | -0,01642 | 0,781 | 0,831 | 1 |
| Prob1    | 0,233189 | 0,033587 | 0,184 | 0,163 | 1 |
| Oxa1l    | 0,233241 | 0,050162 | 0,406 | 0,389 | 1 |
| Simc1    | 0,233254 | -0,0304  | 0,111 | 0,13  | 1 |
| Gm12216  | 0,233293 | 0,00818  | 0,062 | 0,047 | 1 |
| Chd2     | 0,233561 | -0,03968 | 0,414 | 0,437 | 1 |
| Kctd7    | 0,233724 | -0,03    | 0,221 | 0,244 | 1 |
| Stau2    | 0,233724 | -0,02349 | 0,103 | 0,122 | 1 |
| Rpl9     | 0,233852 | 0,034854 | 0,994 | 0,987 | 1 |
| Cnnm4    | 0,23392  | 0,024954 | 0,074 | 0,059 | 1 |
| mt-Nd6   | 0,234036 | -0,05073 | 0,447 | 0,476 | 1 |
| Zfp1     | 0,234048 | -0,02254 | 0,251 | 0,28  | 1 |
| Mrpl1    | 0,234074 | 0,026437 | 0,237 | 0,213 | 1 |
| Prdm10   | 0,234318 | -0,01564 | 0,08  | 0,098 | 1 |
| Zfp781   | 0,234368 | -0,00659 | 0,015 | 0,023 | 1 |
| Rpl28    | 0,234487 | 0,031909 | 0,999 | 0,998 | 1 |
| Pik3cb   | 0,234665 | -0,02987 | 0,197 | 0,22  | 1 |
| Cystm1   | 0,234722 | -0,02186 | 0,965 | 0,977 | 1 |
| Senp6    | 0,234734 | 0,048557 | 0,845 | 0,837 | 1 |
| Psmd9    | 0,234942 | 0,028015 | 0,512 | 0,481 | 1 |
| Trp53    | 0,235242 | 0,035915 | 0,267 | 0,242 | 1 |
| Gmcl1    | 0,235254 | -0,01482 | 0,331 | 0,364 | 1 |
| Pacsin2  | 0,235261 | -0,01657 | 0,247 | 0,276 | 1 |
| Rpl8     | 0,235267 | 0,028146 | 0,993 | 0,997 | 1 |
| Cep89    | 0,235268 | -0,01676 | 0,154 | 0,177 | 1 |
| Osbpl8   | 0,235336 | -0,01732 | 0,252 | 0,281 | 1 |
| Zyx      | 0,235389 | 0,053926 | 0,484 | 0,449 | 1 |
| Fgfr1op2 | 0,235534 | 0,029989 | 0,679 | 0,668 | 1 |
| Prune1   | 0,235638 | 0,022279 | 0,111 | 0,093 | 1 |
| Adrm1    | 0,235675 | -0,02718 | 0,552 | 0,579 | 1 |
| Pou5f1   | 0,235676 | -0,00562 | 0,015 | 0,023 | 1 |
| Pus7     | 0,235711 | -0,02753 | 0,361 | 0,395 | 1 |
| Anks3    | 0,235809 | -0,01736 | 0,242 | 0,268 | 1 |
| Gne      | 0,236047 | -0,00664 | 0,164 | 0,189 | 1 |
| Ecsit    | 0,236175 | -0,01563 | 0,289 | 0,317 | 1 |
| Lnx2     | 0,236226 | 0,016141 | 0,015 | 0,008 | 1 |
| Timm9    | 0,23623  | -0,0088  | 0,371 | 0,403 | 1 |
| Pdk1     | 0,236519 | -0,01691 | 0,057 | 0,072 | 1 |
| Uckl1    | 0,236521 | -0,02071 | 0,339 | 0,371 | 1 |

|           |          |          |       |       |   |
|-----------|----------|----------|-------|-------|---|
| Gdpgp1    | 0,236772 | -0,01458 | 0,057 | 0,072 | 1 |
| Usp10     | 0,236875 | -0,02312 | 0,28  | 0,307 | 1 |
| Jmjd1c    | 0,236919 | 0,126462 | 0,691 | 0,691 | 1 |
| Srsf4     | 0,236919 | -0,01953 | 0,362 | 0,4   | 1 |
| Snx24     | 0,237046 | -0,02151 | 0,388 | 0,421 | 1 |
| Ecd       | 0,237057 | -0,02351 | 0,298 | 0,328 | 1 |
| Atad3a    | 0,237057 | -0,02432 | 0,226 | 0,25  | 1 |
| Ints9     | 0,237136 | -0,01483 | 0,197 | 0,224 | 1 |
| Scyl2     | 0,237173 | 0,021796 | 0,215 | 0,19  | 1 |
| C030034I2 | 0,237434 | -0,01698 | 0,038 | 0,05  | 1 |
| Ndufaf4   | 0,237484 | -0,02606 | 0,241 | 0,267 | 1 |
| Derl3     | 0,237716 | -0,01827 | 0,041 | 0,054 | 1 |
| Rad51d    | 0,237822 | -0,02629 | 0,207 | 0,233 | 1 |
| 4930590JC | 0,237914 | 0,01134  | 0,015 | 0,008 | 1 |
| Nrg2      | 0,238093 | -0,01051 | 0,076 | 0,093 | 1 |
| Gpr35     | 0,238303 | 0,00077  | 0,015 | 0,023 | 1 |
| Zfp992    | 0,238362 | -0,0143  | 0,066 | 0,081 | 1 |
| Ddx56     | 0,238427 | 0,041524 | 0,289 | 0,267 | 1 |
| Wrap53    | 0,238557 | -0,04068 | 0,437 | 0,46  | 1 |
| Plagl1    | 0,23876  | -0,02957 | 0,166 | 0,187 | 1 |
| Pkia      | 0,238763 | -0,01496 | 0,115 | 0,135 | 1 |
| Emc10     | 0,238777 | 0,028734 | 0,993 | 0,995 | 1 |
| Cgrrf1    | 0,238819 | -0,02178 | 0,216 | 0,241 | 1 |
| Fam212b   | 0,238871 | 0,035285 | 0,184 | 0,163 | 1 |
| Slc12a9   | 0,23902  | 0,032778 | 0,456 | 0,423 | 1 |
| Tmem86b   | 0,239187 | -0,00879 | 0,035 | 0,047 | 1 |
| Adam11    | 0,239213 | -0,04855 | 0,182 | 0,203 | 1 |
| Nfyc      | 0,239449 | 0,034887 | 0,25  | 0,226 | 1 |
| Ppm1g     | 0,239463 | -0,02109 | 0,454 | 0,486 | 1 |
| Glcci1    | 0,239584 | -0,01126 | 0,15  | 0,174 | 1 |
| Ccdc136   | 0,239597 | 0,026894 | 0,259 | 0,231 | 1 |
| Gm48529   | 0,239609 | 0,008448 | 0,015 | 0,008 | 1 |
| Cdk18     | 0,239637 | -0,02165 | 0,685 | 0,735 | 1 |
| Impa1     | 0,239726 | -0,0258  | 0,442 | 0,472 | 1 |
| Mettl17   | 0,239734 | -0,01823 | 0,1   | 0,119 | 1 |
| Polr2d    | 0,239748 | -0,02286 | 0,251 | 0,278 | 1 |
| Rcan1     | 0,239882 | -0,01536 | 0,199 | 0,224 | 1 |
| Rpl36     | 0,240139 | 0,030815 | 0,997 | 0,997 | 1 |
| Ccr12     | 0,240176 | 0,007482 | 0,015 | 0,008 | 1 |
| Hgs       | 0,240176 | 0,007482 | 0,015 | 0,008 | 1 |
| Rnf10     | 0,240318 | 0,037077 | 0,792 | 0,792 | 1 |
| 9230104M  | 0,240521 | 0,009728 | 0,015 | 0,008 | 1 |
| Zfp35     | 0,240622 | -0,0177  | 0,112 | 0,132 | 1 |
| 5430402O  | 0,240743 | 0,006516 | 0,015 | 0,008 | 1 |
| Gm14168   | 0,240749 | 0,007801 | 0,015 | 0,008 | 1 |
| Smarcal1  | 0,240752 | -0,01219 | 0,188 | 0,213 | 1 |
| Capzb     | 0,24111  | 0,043031 | 0,739 | 0,743 | 1 |
| Arpc4     | 0,241121 | 0,031781 | 0,738 | 0,715 | 1 |
| Zdhhc24   | 0,241151 | -0,02779 | 0,12  | 0,138 | 1 |
| Sdhaf2    | 0,241214 | -0,01835 | 0,278 | 0,309 | 1 |
| Ccpg1os   | 0,241217 | -0,02545 | 0,11  | 0,128 | 1 |
| Slc30a1   | 0,241368 | 0,05318  | 0,226 | 0,207 | 1 |

|           |          |          |       |       |   |
|-----------|----------|----------|-------|-------|---|
| Ipo11     | 0,241518 | -0,0092  | 0,173 | 0,198 | 1 |
| Ntan1     | 0,241629 | -0,01504 | 0,635 | 0,663 | 1 |
| Rdh13     | 0,241863 | -0,01394 | 0,083 | 0,101 | 1 |
| Adam18    | 0,241888 | 0,005871 | 0,015 | 0,008 | 1 |
| Secisbp2l | 0,242094 | -0,02822 | 0,984 | 0,99  | 1 |
| B4galt6   | 0,242321 | -0,01575 | 0,147 | 0,169 | 1 |
| Rab22a    | 0,242369 | -0,02068 | 0,528 | 0,567 | 1 |
| BC003331  | 0,242389 | -0,02195 | 0,482 | 0,514 | 1 |
| Emc4      | 0,242491 | 0,031949 | 0,6   | 0,58  | 1 |
| Grb14     | 0,242524 | -0,03012 | 0,949 | 0,941 | 1 |
| Fam126b   | 0,242536 | 0,035636 | 0,361 | 0,337 | 1 |
| Mmp16     | 0,24254  | -0,00423 | 0,026 | 0,036 | 1 |
| Tmem143   | 0,242553 | -0,01766 | 0,148 | 0,171 | 1 |
| Mfsd5     | 0,242726 | -0,01875 | 0,303 | 0,338 | 1 |
| Oaz2      | 0,242759 | -0,01992 | 0,392 | 0,423 | 1 |
| 1700052K  | 0,242772 | -0,00786 | 0,054 | 0,068 | 1 |
| Snupn     | 0,242901 | -0,0258  | 0,206 | 0,231 | 1 |
| Atad2b    | 0,242905 | -0,02717 | 0,451 | 0,499 | 1 |
| Bccip     | 0,242909 | -0,0216  | 0,365 | 0,398 | 1 |
| Rnf41     | 0,242914 | -0,03034 | 0,267 | 0,294 | 1 |
| Ufc1      | 0,242918 | -0,0292  | 0,641 | 0,655 | 1 |
| Cxxc5     | 0,242979 | 0,038924 | 0,85  | 0,85  | 1 |
| Trpv4     | 0,243057 | 0,019634 | 0,04  | 0,029 | 1 |
| AC163032  | 0,243074 | -0,0098  | 0,148 | 0,172 | 1 |
| Nkx2-9    | 0,243084 | -0,00593 | 0,22  | 0,247 | 1 |
| Aco1      | 0,243236 | -0,00365 | 0,235 | 0,267 | 1 |
| Rraga     | 0,243324 | -0,02624 | 0,62  | 0,665 | 1 |
| Exosc1    | 0,243337 | 0,035382 | 0,283 | 0,257 | 1 |
| Ccdc166   | 0,243692 | 0,01025  | 0,046 | 0,034 | 1 |
| Tpgs2     | 0,243715 | -0,01953 | 0,31  | 0,34  | 1 |
| Baiap2    | 0,24372  | 0,024931 | 0,04  | 0,029 | 1 |
| Angel2    | 0,243725 | -0,03473 | 0,499 | 0,522 | 1 |
| Mkl2      | 0,243918 | -0,01782 | 0,221 | 0,247 | 1 |
| Hspa1b    | 0,244048 | 0,145016 | 0,395 | 0,363 | 1 |
| Gcn1l1    | 0,244135 | 0,039269 | 0,416 | 0,395 | 1 |
| Rrh       | 0,244236 | -0,00803 | 0,005 | 0,01  | 1 |
| Slc35g2   | 0,244236 | -0,00803 | 0,005 | 0,01  | 1 |
| Rpl26     | 0,244278 | -0,03181 | 0,995 | 0,993 | 1 |
| Hexim2    | 0,244347 | -0,0221  | 0,056 | 0,07  | 1 |
| Zscan21   | 0,244416 | -0,01518 | 0,132 | 0,153 | 1 |
| Rpa1      | 0,244417 | -0,02529 | 0,422 | 0,455 | 1 |
| Timm8b    | 0,244449 | -0,02332 | 0,72  | 0,758 | 1 |
| Dennd6a   | 0,24446  | -0,03063 | 0,281 | 0,307 | 1 |
| Dync1h1   | 0,24451  | -0,01195 | 0,959 | 0,971 | 1 |
| Osbpl2    | 0,24451  | -0,01167 | 0,337 | 0,369 | 1 |
| Psm6      | 0,24464  | -0,03238 | 0,623 | 0,655 | 1 |
| Tmem201   | 0,244705 | -0,03027 | 0,214 | 0,237 | 1 |
| Zfp40     | 0,244782 | -0,02843 | 0,186 | 0,21  | 1 |
| Arpc5l    | 0,244799 | -0,02415 | 0,612 | 0,636 | 1 |
| Ankrd28   | 0,244808 | 0,011009 | 0,89  | 0,919 | 1 |
| Abcb6     | 0,245005 | -0,012   | 0,107 | 0,127 | 1 |
| Grm5      | 0,24501  | -0,00642 | 0,005 | 0,01  | 1 |

|           |          |          |       |       |   |
|-----------|----------|----------|-------|-------|---|
| Ednrb     | 0,24501  | -0,00642 | 0,005 | 0,01  | 1 |
| Gm17597   | 0,24501  | -0,00642 | 0,005 | 0,01  | 1 |
| Kpnb1     | 0,245051 | -0,02942 | 0,657 | 0,686 | 1 |
| Nudt1     | 0,245195 | -0,02237 | 0,116 | 0,135 | 1 |
| Selenon   | 0,245222 | -0,03107 | 0,349 | 0,376 | 1 |
| Zfp709    | 0,245281 | 0,010577 | 0,044 | 0,033 | 1 |
| Bex2      | 0,245448 | -0,00946 | 0,028 | 0,039 | 1 |
| Gm49012   | 0,245574 | 0,007347 | 0,097 | 0,08  | 1 |
| Trpc1     | 0,245583 | -0,01367 | 0,415 | 0,449 | 1 |
| Akap7     | 0,245661 | 0,033176 | 0,325 | 0,298 | 1 |
| Fam129b   | 0,245685 | 0,023889 | 0,128 | 0,109 | 1 |
| Sik2      | 0,245766 | -0,03066 | 0,327 | 0,356 | 1 |
| 4930524JC | 0,245768 | -0,00811 | 0,022 | 0,031 | 1 |
| Gm42417   | 0,245785 | -0,00481 | 0,005 | 0,01  | 1 |
| Eva1a     | 0,245785 | -0,00481 | 0,005 | 0,01  | 1 |
| Amigo3    | 0,245785 | -0,00481 | 0,005 | 0,01  | 1 |
| Slc51a    | 0,245785 | -0,00481 | 0,005 | 0,01  | 1 |
| Dlgap5    | 0,245787 | -0,00705 | 0,005 | 0,01  | 1 |
| Cdca8     | 0,245787 | -0,00954 | 0,028 | 0,039 | 1 |
| Ttc30a1   | 0,245931 | -0,00859 | 0,028 | 0,039 | 1 |
| Rev1      | 0,246058 | 0,035883 | 0,265 | 0,241 | 1 |
| Ccnh      | 0,246133 | -0,01709 | 0,393 | 0,424 | 1 |
| Ltbp1     | 0,246193 | 0,014834 | 0,017 | 0,01  | 1 |
| Slc22a15  | 0,246208 | -0,03776 | 0,197 | 0,221 | 1 |
| Mrpl36    | 0,246413 | -0,02076 | 0,395 | 0,434 | 1 |
| Setd6     | 0,246565 | 0,01671  | 0,109 | 0,091 | 1 |
| Radil     | 0,24672  | -0,00189 | 0,005 | 0,01  | 1 |
| 2210411M  | 0,24672  | -0,00384 | 0,005 | 0,01  | 1 |
| C130013H  | 0,24672  | -0,00384 | 0,005 | 0,01  | 1 |
| Sde2      | 0,246743 | -0,03583 | 0,404 | 0,433 | 1 |
| Thra      | 0,246764 | -0,01905 | 0,989 | 0,984 | 1 |
| Sh3bp5    | 0,246788 | 0,054175 | 0,882 | 0,885 | 1 |
| Twistnb   | 0,247084 | -0,00415 | 0,348 | 0,385 | 1 |
| Tle4      | 0,247115 | -0,00394 | 0,395 | 0,436 | 1 |
| Grid1     | 0,247177 | 0,011366 | 0,008 | 0,003 | 1 |
| Dvl2      | 0,24738  | 0,035228 | 0,242 | 0,22  | 1 |
| Dnajc4    | 0,247402 | -0,01576 | 0,271 | 0,301 | 1 |
| Zscan18   | 0,24743  | 0,017261 | 0,057 | 0,044 | 1 |
| Gm33819   | 0,247504 | 0,008461 | 0,008 | 0,003 | 1 |
| Zc3hav1l  | 0,247504 | 0,008461 | 0,008 | 0,003 | 1 |
| Peg3      | 0,24763  | -0,04353 | 0,345 | 0,372 | 1 |
| Lypd6b    | 0,247751 | 0,018958 | 0,091 | 0,075 | 1 |
| Nrm       | 0,247811 | 0,01069  | 0,017 | 0,01  | 1 |
| Mybphl    | 0,247811 | 0,012611 | 0,017 | 0,01  | 1 |
| Syne4     | 0,247831 | 0,006519 | 0,008 | 0,003 | 1 |
| Gm47237   | 0,247831 | 0,006519 | 0,008 | 0,003 | 1 |
| Klhl10    | 0,247831 | 0,006519 | 0,008 | 0,003 | 1 |
| Arhgap26  | 0,247831 | 0,006519 | 0,008 | 0,003 | 1 |
| Rasgrf2   | 0,247831 | 0,00749  | 0,008 | 0,003 | 1 |
| Urm1      | 0,247843 | -0,02254 | 0,784 | 0,807 | 1 |
| Dnph1     | 0,247867 | -0,02167 | 0,093 | 0,111 | 1 |
| Gm47689   | 0,248014 | -0,00608 | 0,028 | 0,039 | 1 |



|            |          |          |       |       |   |
|------------|----------|----------|-------|-------|---|
| Zmym6      | 0,248053 | -0,03739 | 0,226 | 0,249 | 1 |
| Zmym3      | 0,248089 | -0,01491 | 0,268 | 0,299 | 1 |
| Ampd3      | 0,248159 | 0,006519 | 0,008 | 0,003 | 1 |
| Bag2       | 0,248159 | 0,005547 | 0,008 | 0,003 | 1 |
| Lama5      | 0,248159 | 0,005547 | 0,008 | 0,003 | 1 |
| Sarm1      | 0,248159 | 0,005547 | 0,008 | 0,003 | 1 |
| Peg10      | 0,24816  | -0,03369 | 0,243 | 0,268 | 1 |
| D8Erttd738 | 0,248205 | -0,02178 | 0,903 | 0,911 | 1 |
| Tbx6       | 0,248245 | 0,020994 | 0,032 | 0,023 | 1 |
| Ormdl1     | 0,248342 | -0,02293 | 0,227 | 0,252 | 1 |
| Pcbp4      | 0,248454 | 0,034248 | 0,992 | 0,993 | 1 |
| Gxylt2     | 0,248461 | 0,008765 | 0,017 | 0,01  | 1 |
| Snap23     | 0,24847  | -0,03276 | 0,331 | 0,358 | 1 |
| Zfp746     | 0,248484 | -0,02189 | 0,205 | 0,231 | 1 |
| Pnck       | 0,248486 | 0,004573 | 0,008 | 0,003 | 1 |
| Chp2       | 0,248486 | 0,004573 | 0,008 | 0,003 | 1 |
| Gm45846    | 0,248486 | 0,004573 | 0,008 | 0,003 | 1 |
| Slc44a2    | 0,248591 | 0,040641 | 0,408 | 0,382 | 1 |
| Alg12      | 0,248654 | -0,01526 | 0,082 | 0,099 | 1 |
| Gm16052    | 0,248718 | -0,0049  | 0,022 | 0,031 | 1 |
| Gm17275    | 0,2488   | -0,00299 | 0,022 | 0,031 | 1 |
| G630016G   | 0,248817 | -0,01018 | 0,01  | 0,016 | 1 |
| Fth1       | 0,248851 | -0,02524 | 1     | 1     | 1 |
| Zim1       | 0,248901 | 0,008436 | 0,017 | 0,01  | 1 |
| Stac2      | 0,248981 | 0,007811 | 0,008 | 0,003 | 1 |
| Tmem88     | 0,248981 | 0,006841 | 0,008 | 0,003 | 1 |
| Atg2a      | 0,248987 | -0,02544 | 0,225 | 0,249 | 1 |
| Dars       | 0,249111 | -0,03339 | 0,6   | 0,61  | 1 |
| Mapkapk3   | 0,249112 | 0,009728 | 0,017 | 0,01  | 1 |
| Dtwd1      | 0,24915  | 0,023916 | 0,094 | 0,078 | 1 |
| AU019823   | 0,249244 | -0,02527 | 0,285 | 0,314 | 1 |
| Sgsh       | 0,24936  | -0,0135  | 0,183 | 0,208 | 1 |
| Naca       | 0,249498 | 0,036548 | 0,978 | 0,985 | 1 |
| Hdac10     | 0,249507 | -0,02316 | 0,135 | 0,156 | 1 |
| Kirrel2    | 0,249764 | 0,006837 | 0,017 | 0,01  | 1 |
| Acbd7      | 0,249803 | 0,002954 | 0,008 | 0,003 | 1 |
| Gm53       | 0,249803 | 0,002954 | 0,008 | 0,003 | 1 |
| D130017N   | 0,250024 | -0,02162 | 0,156 | 0,177 | 1 |
| Smpd4      | 0,250039 | -0,00493 | 0,135 | 0,158 | 1 |
| Ppig       | 0,250128 | -0,01127 | 0,713 | 0,748 | 1 |
| Tmem178k   | 0,250179 | 0,042524 | 0,86  | 0,844 | 1 |
| Gpsm1      | 0,250227 | 0,014762 | 0,314 | 0,283 | 1 |
| Zfp800     | 0,250236 | -0,0172  | 0,446 | 0,478 | 1 |
| Tgfbr1     | 0,25024  | -0,00819 | 0,218 | 0,246 | 1 |
| Ankrd40    | 0,250399 | 0,039898 | 0,787 | 0,769 | 1 |
| Zfp711     | 0,250795 | 5,69E-05 | 0,008 | 0,003 | 1 |
| Phospho2   | 0,25081  | -0,00909 | 0,182 | 0,207 | 1 |
| Ppp1r13l   | 0,250812 | 0,013877 | 0,019 | 0,011 | 1 |
| Snx5       | 0,250818 | -0,03557 | 0,668 | 0,693 | 1 |
| Rpl15      | 0,250823 | -0,02382 | 0,985 | 0,976 | 1 |
| Gm43625    | 0,25086  | 0,007156 | 0,017 | 0,01  | 1 |
| Nos1ap     | 0,250906 | -0,01509 | 0,104 | 0,124 | 1 |

|           |          |          |       |       |   |
|-----------|----------|----------|-------|-------|---|
| Mpdz      | 0,250995 | -0,02442 | 0,423 | 0,447 | 1 |
| 9430002A: | 0,25115  | -0,00636 | 0,01  | 0,016 | 1 |
| Magoh     | 0,251297 | -0,02643 | 0,383 | 0,411 | 1 |
| Itpa      | 0,251377 | -0,01248 | 0,363 | 0,395 | 1 |
| Usp40     | 0,251467 | -0,03628 | 0,338 | 0,367 | 1 |
| Zfand2a   | 0,251674 | 0,028134 | 0,23  | 0,208 | 1 |
| Nagk      | 0,251676 | 0,036318 | 0,304 | 0,28  | 1 |
| Prima1    | 0,251821 | 0,058804 | 0,537 | 0,52  | 1 |
| Crtc2     | 0,251938 | -0,01135 | 0,204 | 0,231 | 1 |
| Zswim3    | 0,252084 | -0,00817 | 0,018 | 0,026 | 1 |
| Zfp995    | 0,252343 | -0,01351 | 0,034 | 0,046 | 1 |
| U2af1     | 0,252408 | 0,033421 | 0,899 | 0,888 | 1 |
| Dpy19l3   | 0,252448 | -0,00408 | 0,01  | 0,016 | 1 |
| Col7a1    | 0,252448 | -0,00505 | 0,01  | 0,016 | 1 |
| Mid1ip1   | 0,252675 | -0,03142 | 0,954 | 0,963 | 1 |
| Plpp7     | 0,252732 | 0,019227 | 0,168 | 0,146 | 1 |
| Gm16152   | 0,252882 | -0,01178 | 0,025 | 0,034 | 1 |
| Chic2     | 0,252949 | -0,01899 | 0,065 | 0,08  | 1 |
| Mmaa      | 0,253018 | 0,023584 | 0,224 | 0,2   | 1 |
| Nrxn1     | 0,253279 | -0,0318  | 0,079 | 0,094 | 1 |
| Fabp7     | 0,253315 | 0,020705 | 0,032 | 0,023 | 1 |
| Gm28221   | 0,25354  | -0,00625 | 0,018 | 0,026 | 1 |
| Ighmbp2   | 0,253553 | 0,012361 | 0,057 | 0,044 | 1 |
| Mdh2      | 0,253557 | -0,01295 | 0,857 | 0,88  | 1 |
| Tpst2     | 0,25361  | 0,041172 | 0,231 | 0,211 | 1 |
| Polr3b    | 0,253673 | -0,01132 | 0,127 | 0,148 | 1 |
| Nlrc4     | 0,253702 | 0,010042 | 0,019 | 0,011 | 1 |
| Slc17a5   | 0,253737 | -0,03906 | 0,28  | 0,302 | 1 |
| Sik1      | 0,253788 | -0,01349 | 0,044 | 0,057 | 1 |
| Slc39a13  | 0,25379  | 0,018707 | 0,265 | 0,237 | 1 |
| Spsb3     | 0,25383  | 0,021304 | 0,304 | 0,275 | 1 |
| Gpi1      | 0,253985 | -0,01378 | 0,89  | 0,906 | 1 |
| Zfp354a   | 0,254036 | 0,023    | 0,121 | 0,102 | 1 |
| Fbxo10    | 0,254072 | -0,01337 | 0,082 | 0,099 | 1 |
| Zfp213    | 0,254082 | 0,019097 | 0,13  | 0,111 | 1 |
| Bmt2      | 0,254097 | -0,02947 | 0,277 | 0,301 | 1 |
| Kdelr2    | 0,254148 | -0,01347 | 0,433 | 0,472 | 1 |
| Bloc1s4   | 0,254279 | -0,02671 | 0,291 | 0,317 | 1 |
| Sbk3      | 0,254428 | 0,011002 | 0,019 | 0,011 | 1 |
| AI597479  | 0,254482 | -0,01403 | 0,176 | 0,2   | 1 |
| Zc3h8     | 0,254504 | -0,01977 | 0,111 | 0,13  | 1 |
| Nr6a1     | 0,254595 | -0,01497 | 0,062 | 0,076 | 1 |
| Nop9      | 0,254768 | -0,01179 | 0,145 | 0,167 | 1 |
| Tppp3     | 0,255029 | -0,03813 | 0,942 | 0,935 | 1 |
| Adamts1   | 0,255223 | -0,02457 | 0,598 | 0,618 | 1 |
| Rab30     | 0,255237 | -0,02767 | 0,259 | 0,285 | 1 |
| Zfyve28   | 0,25541  | -0,01195 | 0,014 | 0,021 | 1 |
| Hsf4      | 0,255473 | 0,010355 | 0,019 | 0,011 | 1 |
| Eif2ak3   | 0,255545 | -0,02424 | 0,207 | 0,229 | 1 |
| Abcd3     | 0,255561 | -0,02419 | 0,479 | 0,515 | 1 |
| 1700056E2 | 0,255613 | -0,00976 | 0,014 | 0,021 | 1 |
| Lpo       | 0,25565  | -0,01469 | 0,074 | 0,089 | 1 |

|          |          |          |       |       |   |
|----------|----------|----------|-------|-------|---|
| Dclre1a  | 0,255708 | -0,0159  | 0,12  | 0,14  | 1 |
| Gm16958  | 0,25586  | -0,00715 | 0,06  | 0,075 | 1 |
| Lncpint  | 0,255968 | -0,03313 | 0,229 | 0,25  | 1 |
| Ppib     | 0,256396 | -0,01776 | 0,956 | 0,964 | 1 |
| Kat6a    | 0,256597 | -0,02155 | 0,664 | 0,68  | 1 |
| Clasrp   | 0,256699 | 0,025306 | 0,546 | 0,524 | 1 |
| Gm26724  | 0,256707 | -0,02106 | 0,124 | 0,143 | 1 |
| Eid2b    | 0,256779 | -0,01209 | 0,13  | 0,151 | 1 |
| Rexo4    | 0,256789 | 0,029607 | 0,254 | 0,231 | 1 |
| Setd7    | 0,256797 | -0,03169 | 0,627 | 0,655 | 1 |
| Nrd1     | 0,25692  | -0,02512 | 0,833 | 0,842 | 1 |
| Ide      | 0,256967 | -0,04034 | 0,513 | 0,533 | 1 |
| Itpripl1 | 0,257038 | 0,007475 | 0,019 | 0,011 | 1 |
| Tbl2     | 0,257041 | -0,02103 | 0,142 | 0,163 | 1 |
| Chst10   | 0,257048 | -0,00755 | 0,014 | 0,021 | 1 |
| Ndufs8   | 0,257053 | 0,027496 | 0,641 | 0,623 | 1 |
| Timp4    | 0,257247 | -0,0063  | 0,014 | 0,021 | 1 |
| C1qtnf4  | 0,257251 | -0,00596 | 0,014 | 0,021 | 1 |
| Nova1    | 0,257661 | -0,01704 | 0,252 | 0,278 | 1 |
| Cep131   | 0,257757 | -0,01588 | 0,093 | 0,111 | 1 |
| Rnf121   | 0,257888 | -0,02383 | 0,292 | 0,32  | 1 |
| Pmvk     | 0,257914 | -0,01951 | 0,515 | 0,554 | 1 |
| Sdhaf3   | 0,258055 | -0,02678 | 0,119 | 0,137 | 1 |
| Slc22a18 | 0,258226 | -0,02003 | 0,043 | 0,055 | 1 |
| Gm20696  | 0,258254 | -0,00973 | 0,034 | 0,046 | 1 |
| Gm10561  | 0,258382 | -0,01067 | 0,034 | 0,046 | 1 |
| Cks2     | 0,25839  | -0,00659 | 0,014 | 0,021 | 1 |
| Mylk     | 0,258412 | 0,024174 | 0,023 | 0,015 | 1 |
| Sgf29    | 0,258518 | -0,02189 | 0,206 | 0,229 | 1 |
| Zfp865   | 0,25884  | 0,036375 | 0,204 | 0,184 | 1 |
| Mad2l1   | 0,258915 | -0,02083 | 0,061 | 0,075 | 1 |
| Ppp1r15b | 0,259014 | -0,02716 | 0,498 | 0,533 | 1 |
| Dcun1d4  | 0,259066 | -0,01916 | 0,214 | 0,239 | 1 |
| Oaf      | 0,25909  | -0,01358 | 0,04  | 0,052 | 1 |
| Mettl6   | 0,25912  | -0,00699 | 0,189 | 0,216 | 1 |
| Zfp646   | 0,25913  | -0,02516 | 0,279 | 0,306 | 1 |
| Tyw3     | 0,25924  | -0,01968 | 0,073 | 0,088 | 1 |
| Phactr3  | 0,259251 | 0,045228 | 0,476 | 0,455 | 1 |
| Mindy1   | 0,259419 | -0,03112 | 0,633 | 0,659 | 1 |
| Micu3    | 0,259491 | -0,0482  | 0,399 | 0,424 | 1 |
| Cenpt    | 0,259565 | 0,022877 | 0,073 | 0,059 | 1 |
| Ormdl2   | 0,259566 | -0,0113  | 0,414 | 0,45  | 1 |
| Nt5m     | 0,259625 | -0,02997 | 0,225 | 0,247 | 1 |
| Lcorl    | 0,25972  | -0,02862 | 0,634 | 0,659 | 1 |
| Eral1    | 0,259819 | -0,02148 | 0,129 | 0,148 | 1 |
| Dand5    | 0,259831 | 0,008454 | 0,127 | 0,107 | 1 |
| Mtmr9    | 0,259852 | -0,02947 | 0,332 | 0,359 | 1 |
| Wwox     | 0,260034 | -0,02361 | 0,255 | 0,281 | 1 |
| Rps9     | 0,260132 | 0,016311 | 0,996 | 0,998 | 1 |
| BC051077 | 0,260179 | 0,025217 | 0,06  | 0,047 | 1 |
| Zfp619   | 0,260185 | -0,00944 | 0,05  | 0,063 | 1 |
| Gm14403  | 0,260738 | 0,017567 | 0,079 | 0,063 | 1 |

|           |          |          |       |       |   |
|-----------|----------|----------|-------|-------|---|
| Taf7      | 0,260806 | -0,02352 | 0,465 | 0,499 | 1 |
| Klf2      | 0,260879 | 0,036246 | 0,021 | 0,013 | 1 |
| Stoml1    | 0,260934 | 0,018875 | 0,236 | 0,211 | 1 |
| Odf2      | 0,260945 | -0,01999 | 0,385 | 0,42  | 1 |
| Csnk2a1   | 0,261022 | 0,035567 | 0,954 | 0,948 | 1 |
| Pacs1     | 0,261137 | 0,011904 | 0,028 | 0,02  | 1 |
| Gpr176    | 0,261216 | -0,01239 | 0,027 | 0,037 | 1 |
| Smim5     | 0,261411 | 0,002123 | 0,08  | 0,098 | 1 |
| Eml6      | 0,261459 | -0,02396 | 0,185 | 0,208 | 1 |
| Dalrd3    | 0,261822 | -0,00637 | 0,299 | 0,335 | 1 |
| Ptpn21    | 0,261825 | 0,015924 | 0,089 | 0,073 | 1 |
| Gm7324    | 0,261853 | 0,011287 | 0,025 | 0,016 | 1 |
| Gm26664   | 0,261872 | 0,011596 | 0,026 | 0,018 | 1 |
| Bdh1      | 0,261997 | -0,01791 | 0,095 | 0,112 | 1 |
| Mogs      | 0,262009 | -0,01363 | 0,14  | 0,161 | 1 |
| Dag1      | 0,262059 | -0,01935 | 0,169 | 0,192 | 1 |
| Sgip1     | 0,262094 | -0,01395 | 0,279 | 0,309 | 1 |
| C1galt1   | 0,262113 | -0,03294 | 0,21  | 0,231 | 1 |
| A230001M  | 0,262132 | -0,01705 | 0,39  | 0,42  | 1 |
| Elp3      | 0,262153 | 0,022835 | 0,314 | 0,286 | 1 |
| Ncoa5     | 0,262202 | -0,02312 | 0,166 | 0,187 | 1 |
| E2f5      | 0,262204 | -0,02841 | 0,236 | 0,259 | 1 |
| Zfhx3     | 0,262224 | 0,051741 | 0,315 | 0,291 | 1 |
| Mob3c     | 0,262304 | -0,02013 | 0,07  | 0,085 | 1 |
| Gm44623   | 0,262415 | -0,01427 | 0,043 | 0,055 | 1 |
| Ifngr1    | 0,262422 | -0,01248 | 0,244 | 0,273 | 1 |
| Prrc1     | 0,262434 | -0,01214 | 0,237 | 0,265 | 1 |
| Rpgr      | 0,262535 | -0,01988 | 0,109 | 0,127 | 1 |
| Cnst      | 0,262725 | -0,02114 | 0,132 | 0,151 | 1 |
| Trim8     | 0,262767 | 0,004562 | 0,464 | 0,512 | 1 |
| Dph7      | 0,262847 | -0,01904 | 0,175 | 0,197 | 1 |
| Uba3      | 0,262937 | -0,01556 | 0,43  | 0,465 | 1 |
| Magee1    | 0,26305  | -0,01743 | 0,302 | 0,332 | 1 |
| H2-K1     | 0,263076 | -0,12712 | 0,505 | 0,473 | 1 |
| Zhx3      | 0,263207 | -0,03743 | 0,272 | 0,291 | 1 |
| C530008M  | 0,263398 | -0,03336 | 0,22  | 0,244 | 1 |
| Trmt10c   | 0,263408 | -0,01827 | 0,132 | 0,151 | 1 |
| Ankrd44   | 0,263498 | 0,027131 | 0,302 | 0,278 | 1 |
| Cc2d1a    | 0,263527 | -0,01576 | 0,144 | 0,166 | 1 |
| Lrig3     | 0,26354  | -0,01945 | 0,338 | 0,364 | 1 |
| Hspb1     | 0,263592 | 0,004285 | 0,014 | 0,021 | 1 |
| Usp32     | 0,263636 | -0,02881 | 0,399 | 0,428 | 1 |
| Churc1    | 0,263713 | -0,02079 | 0,703 | 0,746 | 1 |
| Kmt2a     | 0,263869 | -0,02439 | 0,696 | 0,735 | 1 |
| Timp2     | 0,263875 | 0,036223 | 0,847 | 0,831 | 1 |
| Trmt5     | 0,263968 | -0,02217 | 0,08  | 0,096 | 1 |
| Cast      | 0,263986 | 0,037874 | 0,156 | 0,137 | 1 |
| Krcc1     | 0,263998 | 0,05408  | 0,419 | 0,397 | 1 |
| Zfp28     | 0,264002 | 0,017836 | 0,062 | 0,049 | 1 |
| Prmt7     | 0,264179 | -0,01858 | 0,219 | 0,242 | 1 |
| A330069E1 | 0,264294 | -0,12502 | 0,106 | 0,124 | 1 |
| Cul2      | 0,264308 | -0,02111 | 0,262 | 0,288 | 1 |

|           |          |          |       |       |   |
|-----------|----------|----------|-------|-------|---|
| Bend6     | 0,264496 | -0,01187 | 0,021 | 0,029 | 1 |
| Egfem1    | 0,264665 | -0,01064 | 0,021 | 0,029 | 1 |
| Klk9      | 0,264676 | 0,054442 | 0,058 | 0,046 | 1 |
| D030051J2 | 0,264765 | -0,0074  | 0,004 | 0,008 | 1 |
| Crtam     | 0,264765 | -0,0074  | 0,004 | 0,008 | 1 |
| Gm10658   | 0,264765 | -0,00901 | 0,004 | 0,008 | 1 |
| Polk      | 0,265039 | -0,02177 | 0,17  | 0,19  | 1 |
| Plekhh3   | 0,265059 | 0,02775  | 0,067 | 0,054 | 1 |
| Rex1bd    | 0,265179 | -0,01862 | 0,791 | 0,808 | 1 |
| Tmem11    | 0,26522  | -0,02205 | 0,295 | 0,325 | 1 |
| Mad2l1bp  | 0,265231 | 0,019631 | 0,092 | 0,076 | 1 |
| Mfsd12    | 0,265281 | 0,004404 | 0,081 | 0,099 | 1 |
| Zfand1    | 0,265383 | -0,0145  | 0,127 | 0,146 | 1 |
| Dact1     | 0,265401 | 0,006827 | 0,023 | 0,015 | 1 |
| Nfkbia    | 0,265436 | 0,02945  | 0,367 | 0,343 | 1 |
| Chrdl2    | 0,265489 | -0,00579 | 0,004 | 0,008 | 1 |
| 1810010Dl | 0,265489 | -0,00579 | 0,004 | 0,008 | 1 |
| Reep6     | 0,265489 | -0,00579 | 0,004 | 0,008 | 1 |
| 1700001Pc | 0,265489 | -0,00579 | 0,004 | 0,008 | 1 |
| Rflna     | 0,265489 | -0,0074  | 0,004 | 0,008 | 1 |
| Tnfrsf23  | 0,26549  | -0,01761 | 0,004 | 0,008 | 1 |
| Rrnad1    | 0,265498 | -0,03283 | 0,306 | 0,333 | 1 |
| Hmgn2     | 0,265638 | -0,01649 | 0,844 | 0,863 | 1 |
| Pdzd2     | 0,265671 | -0,00642 | 0,004 | 0,008 | 1 |
| Gm42669   | 0,265683 | 0,004277 | 0,023 | 0,015 | 1 |
| Kansl2    | 0,265746 | -0,0257  | 0,334 | 0,358 | 1 |
| Armcx1    | 0,265867 | -0,01323 | 0,315 | 0,348 | 1 |
| Uso1      | 0,26588  | -0,02254 | 0,387 | 0,415 | 1 |
| Dgcr2     | 0,265899 | -0,02945 | 0,385 | 0,411 | 1 |
| Dync1i2   | 0,265952 | -0,02389 | 0,986 | 0,993 | 1 |
| Prox1os   | 0,266122 | 0,043768 | 0,402 | 0,377 | 1 |
| Gps2      | 0,266206 | 0,026815 | 0,484 | 0,463 | 1 |
| Gm27184   | 0,266214 | -0,00418 | 0,004 | 0,008 | 1 |
| Mybph     | 0,266214 | -0,00418 | 0,004 | 0,008 | 1 |
| Grin1     | 0,266214 | -0,00418 | 0,004 | 0,008 | 1 |
| 1110032Fc | 0,266214 | -0,00418 | 0,004 | 0,008 | 1 |
| Chd5      | 0,266214 | -0,00418 | 0,004 | 0,008 | 1 |
| Rph3a     | 0,266214 | -0,00418 | 0,004 | 0,008 | 1 |
| Adcyap1r1 | 0,266214 | -0,00418 | 0,004 | 0,008 | 1 |
| Pglyrp1   | 0,266214 | -0,00418 | 0,004 | 0,008 | 1 |
| Hoxb6     | 0,266214 | -0,00418 | 0,004 | 0,008 | 1 |
| Cygb      | 0,266214 | -0,00418 | 0,004 | 0,008 | 1 |
| Hist1h3e  | 0,266214 | -0,00418 | 0,004 | 0,008 | 1 |
| Pvalb     | 0,266214 | -0,00418 | 0,004 | 0,008 | 1 |
| Zfp947    | 0,266214 | -0,00418 | 0,004 | 0,008 | 1 |
| Kif20a    | 0,266214 | -0,00418 | 0,004 | 0,008 | 1 |
| Acsl5     | 0,266214 | -0,00418 | 0,004 | 0,008 | 1 |
| Thsd1     | 0,26622  | -0,00902 | 0,094 | 0,112 | 1 |
| Zfp455    | 0,266269 | 0,009035 | 0,028 | 0,02  | 1 |
| Spred2    | 0,266295 | -0,0177  | 0,109 | 0,127 | 1 |
| Adnp2     | 0,266337 | -0,0162  | 0,142 | 0,163 | 1 |
| Flicr     | 0,266396 | -0,00481 | 0,004 | 0,008 | 1 |

|           |          |          |       |       |   |
|-----------|----------|----------|-------|-------|---|
| Nr2c1     | 0,266422 | -0,02866 | 0,191 | 0,211 | 1 |
| Clip1     | 0,266544 | -0,03294 | 0,138 | 0,156 | 1 |
| Chpf2     | 0,266545 | 0,029475 | 0,132 | 0,114 | 1 |
| Ginm1     | 0,266722 | -0,01626 | 0,298 | 0,324 | 1 |
| Srfbp1    | 0,266804 | -0,01209 | 0,124 | 0,143 | 1 |
| Telo2     | 0,266932 | -0,01588 | 0,171 | 0,193 | 1 |
| Eif2s2    | 0,267085 | 0,030658 | 0,976 | 0,969 | 1 |
| Atp5e     | 0,267109 | -0,02285 | 0,977 | 0,987 | 1 |
| Dlgap1    | 0,267123 | 0,001668 | 0,004 | 0,008 | 1 |
| Gm20659   | 0,267123 | -0,00125 | 0,004 | 0,008 | 1 |
| Retn      | 0,267123 | -0,00223 | 0,004 | 0,008 | 1 |
| Zbtb46    | 0,267123 | -0,0032  | 0,004 | 0,008 | 1 |
| Gm32849   | 0,267123 | -0,0032  | 0,004 | 0,008 | 1 |
| Kbtbd6    | 0,267123 | -0,0032  | 0,004 | 0,008 | 1 |
| Cnmd      | 0,267123 | -0,0032  | 0,004 | 0,008 | 1 |
| Gm47232   | 0,267123 | -0,0032  | 0,004 | 0,008 | 1 |
| Sem1      | 0,267145 | -0,0212  | 0,911 | 0,927 | 1 |
| Usp16     | 0,267186 | -0,02832 | 0,432 | 0,459 | 1 |
| Ss18      | 0,267203 | 0,031576 | 0,522 | 0,502 | 1 |
| Zfp202    | 0,267233 | -0,00413 | 0,034 | 0,046 | 1 |
| B43001012 | 0,267248 | -0,03467 | 0,255 | 0,28  | 1 |
| Gm26660   | 0,267309 | -0,02328 | 0,095 | 0,112 | 1 |
| Zfp41     | 0,267337 | -0,01503 | 0,179 | 0,203 | 1 |
| Pgm2      | 0,267346 | -0,01298 | 0,205 | 0,231 | 1 |
| Pdgfa     | 0,267406 | 0,029526 | 0,947 | 0,935 | 1 |
| Edem2     | 0,267482 | 0,032794 | 0,576 | 0,548 | 1 |
| Habp4     | 0,26751  | -0,01685 | 0,152 | 0,174 | 1 |
| E430024P1 | 0,267575 | -0,01187 | 0,021 | 0,029 | 1 |
| Ppp1r1b   | 0,267797 | 0,003964 | 0,028 | 0,02  | 1 |
| Hltf      | 0,267986 | -0,01177 | 0,406 | 0,436 | 1 |
| Il3ra     | 0,268034 | -0,00223 | 0,004 | 0,008 | 1 |
| Cstf3     | 0,268069 | -0,03647 | 0,242 | 0,262 | 1 |
| Mpc1      | 0,268178 | -0,02962 | 0,982 | 0,979 | 1 |
| Ada       | 0,26818  | 0,017956 | 0,081 | 0,067 | 1 |
| Acad8     | 0,268401 | -0,02159 | 0,263 | 0,288 | 1 |
| Asap1     | 0,26846  | -0,00865 | 0,361 | 0,395 | 1 |
| Cir1      | 0,268566 | -0,0212  | 0,638 | 0,654 | 1 |
| Purg      | 0,268629 | -0,02665 | 0,17  | 0,19  | 1 |
| Tardbp    | 0,268634 | -0,03631 | 0,616 | 0,65  | 1 |
| Kmt2c     | 0,268692 | -0,00956 | 0,763 | 0,807 | 1 |
| Zmym5     | 0,268768 | 0,033892 | 0,512 | 0,478 | 1 |
| Dlst      | 0,268829 | -0,03888 | 0,528 | 0,558 | 1 |
| Tmem216   | 0,268858 | -0,0078  | 0,059 | 0,073 | 1 |
| Ankrd37   | 0,268861 | 0,018465 | 0,06  | 0,047 | 1 |
| Nfil3     | 0,268927 | 0,022016 | 0,168 | 0,148 | 1 |
| Psme4     | 0,269016 | 0,048918 | 0,382 | 0,367 | 1 |
| Stat5b    | 0,269075 | -0,01624 | 0,098 | 0,115 | 1 |
| Ankhd1    | 0,269112 | 0,028141 | 0,52  | 0,502 | 1 |
| Ccdc51    | 0,269365 | -0,01205 | 0,046 | 0,059 | 1 |
| Hist3h2ba | 0,269585 | 0,05545  | 0,449 | 0,431 | 1 |
| Orc6      | 0,269716 | -0,02418 | 0,334 | 0,367 | 1 |
| Plekhm2   | 0,269827 | 0,024189 | 0,301 | 0,273 | 1 |

|           |          |          |       |       |   |
|-----------|----------|----------|-------|-------|---|
| Rhou      | 0,269876 | 0,043879 | 0,957 | 0,959 | 1 |
| Ppp1cb    | 0,269901 | -0,02043 | 0,891 | 0,902 | 1 |
| Cenpo     | 0,269909 | -0,01821 | 0,079 | 0,094 | 1 |
| Asic1     | 0,270214 | -0,01109 | 0,03  | 0,041 | 1 |
| Pan2      | 0,270271 | -0,02897 | 0,179 | 0,198 | 1 |
| Bms1      | 0,270461 | -0,02795 | 0,266 | 0,289 | 1 |
| Scamp5    | 0,27049  | -0,02502 | 0,77  | 0,803 | 1 |
| Gnai3     | 0,270532 | 0,033902 | 0,604 | 0,582 | 1 |
| Arid2     | 0,270613 | -0,02168 | 0,36  | 0,389 | 1 |
| Klhl32    | 0,27078  | 0,015669 | 0,062 | 0,049 | 1 |
| Hdac3     | 0,270917 | -0,02494 | 0,289 | 0,317 | 1 |
| Wdr37     | 0,270924 | -0,03002 | 0,347 | 0,371 | 1 |
| Slc38a9   | 0,271073 | 0,045488 | 0,422 | 0,4   | 1 |
| Pam16     | 0,271176 | -0,01698 | 0,532 | 0,567 | 1 |
| Ralgps2   | 0,271279 | 0,025318 | 0,06  | 0,047 | 1 |
| Cldnd1    | 0,271385 | -0,01699 | 0,98  | 0,99  | 1 |
| Zfp775    | 0,271435 | -0,0227  | 0,117 | 0,135 | 1 |
| Smyd3     | 0,271651 | -0,00733 | 0,15  | 0,172 | 1 |
| Pfkp      | 0,271804 | -0,00757 | 0,03  | 0,041 | 1 |
| Abhd4     | 0,271887 | -0,03908 | 0,681 | 0,694 | 1 |
| Fam20c    | 0,271982 | 0,029809 | 0,268 | 0,244 | 1 |
| Zc3h4     | 0,272049 | 0,041457 | 0,261 | 0,239 | 1 |
| Inpp4b    | 0,272157 | 0,003918 | 0,002 | 0     | 1 |
| March4    | 0,272157 | 0,001961 | 0,002 | 0     | 1 |
| Wnt6      | 0,272157 | 0,001961 | 0,002 | 0     | 1 |
| Sgpp2     | 0,272157 | 0,001961 | 0,002 | 0     | 1 |
| Ackr3     | 0,272157 | 0,001961 | 0,002 | 0     | 1 |
| Syt2      | 0,272157 | 0,001961 | 0,002 | 0     | 1 |
| Ptprc     | 0,272157 | 0,001961 | 0,002 | 0     | 1 |
| Ccdc121   | 0,272157 | 0,001961 | 0,002 | 0     | 1 |
| Tor4a     | 0,272157 | 0,001961 | 0,002 | 0     | 1 |
| Col5a1    | 0,272157 | 0,001961 | 0,002 | 0     | 1 |
| Ak8       | 0,272157 | 0,001961 | 0,002 | 0     | 1 |
| Cers6     | 0,272157 | 0,001961 | 0,002 | 0     | 1 |
| Ryr3      | 0,272157 | 0,001961 | 0,002 | 0     | 1 |
| Bub1b     | 0,272157 | 0,001961 | 0,002 | 0     | 1 |
| Il1a      | 0,272157 | 0,001961 | 0,002 | 0     | 1 |
| Xlr       | 0,272157 | 0,001961 | 0,002 | 0     | 1 |
| Gm15726   | 0,272157 | 0,001961 | 0,002 | 0     | 1 |
| Sertm1    | 0,272157 | 0,001961 | 0,002 | 0     | 1 |
| Igsf10    | 0,272157 | 0,001961 | 0,002 | 0     | 1 |
| Fcgr1     | 0,272157 | 0,001961 | 0,002 | 0     | 1 |
| Kcnd3     | 0,272157 | 0,001961 | 0,002 | 0     | 1 |
| Lrrc39    | 0,272157 | 0,001961 | 0,002 | 0     | 1 |
| Ddit4l    | 0,272157 | 0,001961 | 0,002 | 0     | 1 |
| Runx1t1   | 0,272157 | 0,001961 | 0,002 | 0     | 1 |
| Gm20878   | 0,272157 | 0,001961 | 0,002 | 0     | 1 |
| Akna      | 0,272157 | 0,001961 | 0,002 | 0     | 1 |
| Cfap57    | 0,272157 | 0,001961 | 0,002 | 0     | 1 |
| Zmynd12   | 0,272157 | 0,001961 | 0,002 | 0     | 1 |
| Runx3     | 0,272157 | 0,001961 | 0,002 | 0     | 1 |
| Arhgef10l | 0,272157 | 0,001961 | 0,002 | 0     | 1 |

|            |          |          |       |   |   |
|------------|----------|----------|-------|---|---|
| Cdk6       | 0,272157 | 0,001961 | 0,002 | 0 | 1 |
| Caln1      | 0,272157 | 0,001961 | 0,002 | 0 | 1 |
| Cped1      | 0,272157 | 0,001961 | 0,002 | 0 | 1 |
| Cfap100    | 0,272157 | 0,001961 | 0,002 | 0 | 1 |
| lqsec3     | 0,272157 | 0,001961 | 0,002 | 0 | 1 |
| Ptpn6      | 0,272157 | 0,001961 | 0,002 | 0 | 1 |
| Rasl2-9    | 0,272157 | 0,001961 | 0,002 | 0 | 1 |
| Hpn        | 0,272157 | 0,001961 | 0,002 | 0 | 1 |
| Gm10605    | 0,272157 | 0,001961 | 0,002 | 0 | 1 |
| Folr2      | 0,272157 | 0,001961 | 0,002 | 0 | 1 |
| Itgax      | 0,272157 | 0,001961 | 0,002 | 0 | 1 |
| Gm47710    | 0,272157 | 0,001961 | 0,002 | 0 | 1 |
| Ddo        | 0,272157 | 0,001961 | 0,002 | 0 | 1 |
| Adora2a    | 0,272157 | 0,001961 | 0,002 | 0 | 1 |
| 1500009L1  | 0,272157 | 0,001961 | 0,002 | 0 | 1 |
| Kitl       | 0,272157 | 0,001961 | 0,002 | 0 | 1 |
| Csmd1      | 0,272157 | 0,001961 | 0,002 | 0 | 1 |
| Ppp1r3b    | 0,272157 | 0,001961 | 0,002 | 0 | 1 |
| Sorbs2     | 0,272157 | 0,001961 | 0,002 | 0 | 1 |
| Dctd       | 0,272157 | 0,001961 | 0,002 | 0 | 1 |
| Lyl1       | 0,272157 | 0,001961 | 0,002 | 0 | 1 |
| Gm42031    | 0,272157 | 0,001961 | 0,002 | 0 | 1 |
| Dnaaf1     | 0,272157 | 0,001961 | 0,002 | 0 | 1 |
| Mir124a-1l | 0,272157 | 0,001961 | 0,002 | 0 | 1 |
| Mmp12      | 0,272157 | 0,001961 | 0,002 | 0 | 1 |
| Fut4       | 0,272157 | 0,001961 | 0,002 | 0 | 1 |
| Epor       | 0,272157 | 0,001961 | 0,002 | 0 | 1 |
| Slc37a2    | 0,272157 | 0,001961 | 0,002 | 0 | 1 |
| C030014l2  | 0,272157 | 0,001961 | 0,002 | 0 | 1 |
| Tpbg       | 0,272157 | 0,001961 | 0,002 | 0 | 1 |
| Gm47950    | 0,272157 | 0,001961 | 0,002 | 0 | 1 |
| Gm12116    | 0,272157 | 0,001961 | 0,002 | 0 | 1 |
| Glra1      | 0,272157 | 0,001961 | 0,002 | 0 | 1 |
| Fam183b    | 0,272157 | 0,001961 | 0,002 | 0 | 1 |
| Tmem132e   | 0,272157 | 0,001961 | 0,002 | 0 | 1 |
| Mmp28      | 0,272157 | 0,001961 | 0,002 | 0 | 1 |
| Pctp       | 0,272157 | 0,001961 | 0,002 | 0 | 1 |
| Meox1      | 0,272157 | 0,001961 | 0,002 | 0 | 1 |
| Mpp3       | 0,272157 | 0,001961 | 0,002 | 0 | 1 |
| Cd300c2    | 0,272157 | 0,001961 | 0,002 | 0 | 1 |
| Ush1g      | 0,272157 | 0,001961 | 0,002 | 0 | 1 |
| Inhba      | 0,272157 | 0,001961 | 0,002 | 0 | 1 |
| Hist1h2br  | 0,272157 | 0,001961 | 0,002 | 0 | 1 |
| Hist1h2ab  | 0,272157 | 0,001961 | 0,002 | 0 | 1 |
| D130043K   | 0,272157 | 0,001961 | 0,002 | 0 | 1 |
| Ly86       | 0,272157 | 0,001961 | 0,002 | 0 | 1 |
| Pygl       | 0,272157 | 0,001961 | 0,002 | 0 | 1 |
| Plekhd1    | 0,272157 | 0,001961 | 0,002 | 0 | 1 |
| Fam181a    | 0,272157 | 0,001961 | 0,002 | 0 | 1 |
| Gm16006    | 0,272157 | 0,001961 | 0,002 | 0 | 1 |
| AL590144   | 0,272157 | 0,001961 | 0,002 | 0 | 1 |
| Prr5       | 0,272157 | 0,001961 | 0,002 | 0 | 1 |



|           |          |          |       |       |   |
|-----------|----------|----------|-------|-------|---|
| Bin2      | 0,272157 | 0,001961 | 0,002 | 0     | 1 |
| Shisa9    | 0,272157 | 0,001961 | 0,002 | 0     | 1 |
| Ifitm7    | 0,272157 | 0,001961 | 0,002 | 0     | 1 |
| Boc       | 0,272157 | 0,001961 | 0,002 | 0     | 1 |
| Ager      | 0,272157 | 0,001961 | 0,002 | 0     | 1 |
| B430306Nl | 0,272157 | 0,001961 | 0,002 | 0     | 1 |
| Adgre1    | 0,272157 | 0,001961 | 0,002 | 0     | 1 |
| Gm6277    | 0,272157 | 0,001961 | 0,002 | 0     | 1 |
| Adrb1     | 0,272157 | 0,001961 | 0,002 | 0     | 1 |
| Cldn19    | 0,272157 | 0,01558  | 0,002 | 0     | 1 |
| Dock11    | 0,272157 | 0,006846 | 0,002 | 0     | 1 |
| Ptgr1     | 0,272157 | 0,004895 | 0,002 | 0     | 1 |
| Col4a1    | 0,272157 | 0,004895 | 0,002 | 0     | 1 |
| Ccdc162   | 0,272157 | 0,003918 | 0,002 | 0     | 1 |
| Klhl3     | 0,272157 | 0,003918 | 0,002 | 0     | 1 |
| 15000150  | 0,272157 | 0,00294  | 0,002 | 0     | 1 |
| Cfh       | 0,272157 | 0,00294  | 0,002 | 0     | 1 |
| Gad1      | 0,272157 | 0,00294  | 0,002 | 0     | 1 |
| Itпка     | 0,272157 | 0,00294  | 0,002 | 0     | 1 |
| Dusp9     | 0,272157 | 0,00294  | 0,002 | 0     | 1 |
| Ar        | 0,272157 | 0,00294  | 0,002 | 0     | 1 |
| Tmem212   | 0,272157 | 0,00294  | 0,002 | 0     | 1 |
| Adora3    | 0,272157 | 0,00294  | 0,002 | 0     | 1 |
| Tctex1d1  | 0,272157 | 0,00294  | 0,002 | 0     | 1 |
| Siglech   | 0,272157 | 0,00294  | 0,002 | 0     | 1 |
| Gm15880   | 0,272157 | 0,00294  | 0,002 | 0     | 1 |
| Pde2a     | 0,272157 | 0,00294  | 0,002 | 0     | 1 |
| Cracr2b   | 0,272157 | 0,00294  | 0,002 | 0     | 1 |
| Dusp4     | 0,272157 | 0,00294  | 0,002 | 0     | 1 |
| Erc2      | 0,272157 | 0,00294  | 0,002 | 0     | 1 |
| Lrrc18    | 0,272157 | 0,00294  | 0,002 | 0     | 1 |
| Bcl2a1b   | 0,272157 | 0,00294  | 0,002 | 0     | 1 |
| Hoxb4     | 0,272157 | 0,00294  | 0,002 | 0     | 1 |
| Arl5c     | 0,272157 | 0,00294  | 0,002 | 0     | 1 |
| Fmn1      | 0,272157 | 0,00294  | 0,002 | 0     | 1 |
| Ak7       | 0,272157 | 0,00294  | 0,002 | 0     | 1 |
| Rimbp3    | 0,272157 | 0,00294  | 0,002 | 0     | 1 |
| Tmem184c  | 0,272186 | -0,02474 | 0,537 | 0,559 | 1 |
| Xrn1      | 0,272207 | -0,02534 | 0,447 | 0,488 | 1 |
| Atp2b1    | 0,272898 | -0,00515 | 0,713 | 0,746 | 1 |
| Ppp1ca    | 0,272986 | -0,01892 | 0,876 | 0,914 | 1 |
| Gm40117   | 0,273059 | -0,01482 | 0,058 | 0,072 | 1 |
| Nsd3      | 0,273097 | -0,02711 | 0,659 | 0,68  | 1 |
| Acly      | 0,27333  | -0,01813 | 0,57  | 0,585 | 1 |
| Fabp3     | 0,27344  | -0,01223 | 0,052 | 0,065 | 1 |
| Gm48855   | 0,273594 | 0,008934 | 0,066 | 0,052 | 1 |
| Hpcal1    | 0,273674 | 0,019622 | 0,216 | 0,192 | 1 |
| Snx10     | 0,273837 | -0,04515 | 0,328 | 0,356 | 1 |
| Zfp511    | 0,273909 | 0,035116 | 0,233 | 0,213 | 1 |
| Ppp1r12c  | 0,273946 | -0,01751 | 0,374 | 0,407 | 1 |
| Rubcn     | 0,274032 | 0,033956 | 0,426 | 0,407 | 1 |
| Mfsd7a    | 0,274094 | -0,00832 | 0,046 | 0,059 | 1 |

|            |          |          |       |       |   |
|------------|----------|----------|-------|-------|---|
| Dctn2      | 0,274215 | 0,029444 | 0,959 | 0,959 | 1 |
| Parp3      | 0,274216 | 0,004343 | 0,17  | 0,15  | 1 |
| 28104740   | 0,274257 | -0,00381 | 0,348 | 0,385 | 1 |
| B3galt2    | 0,274261 | -0,00418 | 0,027 | 0,037 | 1 |
| Psmc4      | 0,274403 | -0,0222  | 0,668 | 0,694 | 1 |
| Tshz3      | 0,274405 | -0,01003 | 0,017 | 0,024 | 1 |
| Gm26825    | 0,274413 | 0,013343 | 0,099 | 0,119 | 1 |
| Jmjd7      | 0,274507 | -0,01392 | 0,104 | 0,122 | 1 |
| Rpl14      | 0,274589 | 0,031846 | 0,995 | 0,99  | 1 |
| Rps6       | 0,274696 | -0,0301  | 0,989 | 0,992 | 1 |
| Agpat5     | 0,274702 | -0,03059 | 0,503 | 0,519 | 1 |
| Gm45844    | 0,274926 | -0,00918 | 0,049 | 0,062 | 1 |
| Gm29994    | 0,275053 | 0,008779 | 0,01  | 0,005 | 1 |
| AY074887   | 0,275053 | 0,009747 | 0,01  | 0,005 | 1 |
| Nrp2       | 0,275078 | 0,029652 | 0,153 | 0,135 | 1 |
| Hsdl2      | 0,275184 | 0,041409 | 0,351 | 0,337 | 1 |
| Pitpna     | 0,275357 | -0,01871 | 0,643 | 0,683 | 1 |
| A630089N   | 0,27539  | -0,00954 | 0,024 | 0,033 | 1 |
| Golph3     | 0,275391 | -0,01597 | 0,395 | 0,424 | 1 |
| Atp11b     | 0,27542  | -0,0284  | 0,488 | 0,527 | 1 |
| Zfp641     | 0,275424 | -0,00734 | 0,009 | 0,015 | 1 |
| Rims1      | 0,275424 | -0,00893 | 0,009 | 0,015 | 1 |
| Fau        | 0,275425 | 0,030356 | 0,997 | 0,997 | 1 |
| Enpp4      | 0,275444 | -0,0403  | 0,931 | 0,941 | 1 |
| Cxxc4      | 0,275516 | 0,007811 | 0,01  | 0,005 | 1 |
| Wdr66      | 0,275516 | 0,007811 | 0,01  | 0,005 | 1 |
| Ska3       | 0,275516 | 0,012644 | 0,01  | 0,005 | 1 |
| Gm34590    | 0,275652 | -0,01061 | 0,084 | 0,101 | 1 |
| Mrpl41     | 0,275797 | -0,02882 | 0,53  | 0,553 | 1 |
| Nhp2       | 0,27584  | 0,023595 | 0,322 | 0,294 | 1 |
| Rbm18      | 0,275892 | -0,01425 | 0,407 | 0,439 | 1 |
| Pcdh17     | 0,2759   | -0,06508 | 0,453 | 0,465 | 1 |
| Cplx1      | 0,27598  | 0,006841 | 0,01  | 0,005 | 1 |
| Gm27253    | 0,27598  | 0,006841 | 0,01  | 0,005 | 1 |
| St6galnac2 | 0,27598  | 0,010713 | 0,01  | 0,005 | 1 |
| Cage1      | 0,27608  | -0,00817 | 0,017 | 0,024 | 1 |
| Atp6v1h    | 0,276094 | -0,01582 | 0,585 | 0,616 | 1 |
| Cenpn      | 0,276103 | -0,00925 | 0,046 | 0,059 | 1 |
| Rprd1a     | 0,276117 | -0,01739 | 0,468 | 0,493 | 1 |
| Tubb4b     | 0,276118 | 0,056223 | 0,626 | 0,611 | 1 |
| Nab2       | 0,276137 | 0,011027 | 0,01  | 0,005 | 1 |
| Chek1      | 0,27622  | -0,00921 | 0,009 | 0,015 | 1 |
| Tnip2      | 0,276386 | 0,026748 | 0,147 | 0,128 | 1 |
| Dhrs3      | 0,276445 | 0,006841 | 0,01  | 0,005 | 1 |
| Bend4      | 0,276445 | 0,006841 | 0,01  | 0,005 | 1 |
| Gm37768    | 0,276445 | 0,005871 | 0,01  | 0,005 | 1 |
| Pde3b      | 0,276445 | 0,005871 | 0,01  | 0,005 | 1 |
| Stac3      | 0,276445 | 0,005871 | 0,01  | 0,005 | 1 |
| Rai14      | 0,276445 | 0,005871 | 0,01  | 0,005 | 1 |
| Eprs       | 0,276485 | -0,02898 | 0,815 | 0,849 | 1 |
| Srd5a1     | 0,276502 | 0,03366  | 0,433 | 0,411 | 1 |
| Dhdh       | 0,276509 | -0,01183 | 0,081 | 0,098 | 1 |

|           |          |          |       |       |   |
|-----------|----------|----------|-------|-------|---|
| Sema3b    | 0,276581 | 0,039772 | 0,084 | 0,07  | 1 |
| 1700112D  | 0,276612 | -0,00636 | 0,009 | 0,015 | 1 |
| Lrrc4     | 0,276741 | 0,035509 | 0,184 | 0,166 | 1 |
| B3gnt4    | 0,276909 | 0,0049   | 0,01  | 0,005 | 1 |
| Gm49271   | 0,276909 | 0,0049   | 0,01  | 0,005 | 1 |
| Zfp930    | 0,276914 | 0,004059 | 0,079 | 0,063 | 1 |
| Vps16     | 0,276973 | -0,03621 | 0,318 | 0,335 | 1 |
| Nup210l   | 0,277068 | 0,006194 | 0,01  | 0,005 | 1 |
| Kdm6bos   | 0,277068 | 0,006194 | 0,01  | 0,005 | 1 |
| Txndc2    | 0,277224 | 0,006516 | 0,01  | 0,005 | 1 |
| Fbxo9     | 0,27739  | 0,031556 | 0,475 | 0,446 | 1 |
| Fahd1     | 0,277506 | -0,01569 | 0,219 | 0,244 | 1 |
| Gm13404   | 0,277614 | -0,00335 | 0,043 | 0,055 | 1 |
| Fchsd2    | 0,277624 | 0,008046 | 0,047 | 0,036 | 1 |
| Rcan3     | 0,277632 | -0,01444 | 0,185 | 0,208 | 1 |
| Ghitm     | 0,277663 | -0,01875 | 0,821 | 0,837 | 1 |
| Hcfc1     | 0,277665 | -0,00096 | 0,384 | 0,424 | 1 |
| Ralgapa2  | 0,277744 | -0,01745 | 0,219 | 0,244 | 1 |
| Ndufb5    | 0,277992 | -0,01597 | 0,815 | 0,834 | 1 |
| Nuf2      | 0,278    | 0,004254 | 0,01  | 0,005 | 1 |
| Rasl12    | 0,278125 | 0,010064 | 0,148 | 0,128 | 1 |
| Pcolce2   | 0,278269 | -0,03162 | 0,677 | 0,699 | 1 |
| Ncapd3    | 0,278394 | 0,034311 | 0,384 | 0,363 | 1 |
| Ift22     | 0,278515 | -0,00454 | 0,374 | 0,413 | 1 |
| Tnfrsf21  | 0,278539 | -0,01118 | 0,024 | 0,033 | 1 |
| Exog      | 0,27875  | -0,01232 | 0,092 | 0,109 | 1 |
| Lym7      | 0,278778 | -0,01956 | 0,048 | 0,06  | 1 |
| Gpr137b   | 0,278984 | -0,01176 | 0,421 | 0,459 | 1 |
| Scn3b     | 0,278998 | -0,00185 | 0,009 | 0,015 | 1 |
| Gm14391   | 0,279023 | -0,01011 | 0,046 | 0,059 | 1 |
| Maged2    | 0,279049 | -0,02027 | 0,272 | 0,298 | 1 |
| 281042910 | 0,279052 | -0,03433 | 0,218 | 0,237 | 1 |
| Spata1    | 0,279255 | -0,0165  | 0,075 | 0,089 | 1 |
| Gm10785   | 0,279406 | 0,001999 | 0,01  | 0,005 | 1 |
| Thrap3    | 0,279419 | -0,01362 | 0,783 | 0,808 | 1 |
| Trappc2   | 0,279422 | -0,03213 | 0,479 | 0,498 | 1 |
| Pttg1ip   | 0,279424 | 0,024903 | 0,712 | 0,688 | 1 |
| Tmed9     | 0,279501 | 0,031799 | 0,903 | 0,881 | 1 |
| Commd10   | 0,279674 | -0,01421 | 0,241 | 0,268 | 1 |
| Cars2     | 0,279737 | 0,023643 | 0,169 | 0,148 | 1 |
| Ifngr2    | 0,279782 | 0,021138 | 0,086 | 0,072 | 1 |
| Clptm1l   | 0,279792 | -0,02254 | 0,551 | 0,582 | 1 |
| Amotl2    | 0,279896 | -0,00827 | 0,688 | 0,724 | 1 |
| G730003C  | 0,279951 | -0,00824 | 0,013 | 0,02  | 1 |
| Pdcl      | 0,280136 | 0,034238 | 0,32  | 0,298 | 1 |
| 9530068E  | 0,280208 | 0,033639 | 0,647 | 0,62  | 1 |
| Fam149b   | 0,280271 | -0,00139 | 0,236 | 0,265 | 1 |
| Kdm5c     | 0,280486 | 0,03165  | 0,402 | 0,374 | 1 |
| Cyp2j12   | 0,280588 | -0,01416 | 0,389 | 0,423 | 1 |
| Zfp869    | 0,280718 | 0,014423 | 0,069 | 0,055 | 1 |
| Asna1     | 0,280772 | 0,031007 | 0,515 | 0,496 | 1 |
| Dlk2      | 0,28082  | 0,021828 | 0,076 | 0,062 | 1 |

|           |          |          |       |       |   |
|-----------|----------|----------|-------|-------|---|
| Sipa1l3   | 0,280863 | -0,00981 | 0,242 | 0,27  | 1 |
| Elmsan1   | 0,281034 | -0,01704 | 0,242 | 0,268 | 1 |
| Map2k6    | 0,281078 | -0,00944 | 0,052 | 0,065 | 1 |
| Eif2b3    | 0,281159 | -0,0121  | 0,303 | 0,333 | 1 |
| Mfn1      | 0,281205 | -0,03243 | 0,58  | 0,605 | 1 |
| Tyms      | 0,281279 | -0,00742 | 0,024 | 0,033 | 1 |
| Atp6v1c1  | 0,281317 | -0,0345  | 0,507 | 0,524 | 1 |
| Atf6b     | 0,281349 | 0,0282   | 0,406 | 0,377 | 1 |
| Ddx47     | 0,281383 | -0,02111 | 0,265 | 0,289 | 1 |
| Pvr       | 0,281586 | 0,01731  | 0,106 | 0,089 | 1 |
| Urod      | 0,281927 | -0,02017 | 0,396 | 0,429 | 1 |
| Dgcr14    | 0,28202  | -0,0147  | 0,148 | 0,169 | 1 |
| Xpa       | 0,282214 | -0,03377 | 0,364 | 0,385 | 1 |
| Wdr36     | 0,282339 | 0,018984 | 0,133 | 0,115 | 1 |
| Snx9      | 0,282398 | 0,046018 | 0,366 | 0,35  | 1 |
| Cd3eap    | 0,282423 | -0,01549 | 0,235 | 0,26  | 1 |
| Taf1c     | 0,282514 | 0,013217 | 0,069 | 0,055 | 1 |
| Gm43915   | 0,282572 | -0,00693 | 0,013 | 0,02  | 1 |
| Slc15a4   | 0,282585 | 0,055062 | 0,684 | 0,675 | 1 |
| Dopey2    | 0,282641 | -0,03451 | 0,487 | 0,509 | 1 |
| Arf2      | 0,28268  | -0,01503 | 0,287 | 0,317 | 1 |
| Wdr70     | 0,282774 | -0,02828 | 0,39  | 0,416 | 1 |
| Atp2b2    | 0,2828   | -0,00596 | 0,013 | 0,02  | 1 |
| Ddx27     | 0,282836 | -0,00556 | 0,302 | 0,332 | 1 |
| Ifi27     | 0,283158 | -0,06826 | 0,818 | 0,821 | 1 |
| Psm11     | 0,283168 | -0,0303  | 0,789 | 0,802 | 1 |
| Ahi1      | 0,283265 | 0,025179 | 0,543 | 0,502 | 1 |
| Rpl23     | 0,283314 | 0,016189 | 0,998 | 0,993 | 1 |
| 4833420G  | 0,283315 | -0,03495 | 0,344 | 0,366 | 1 |
| Hinfp     | 0,28348  | 0,038838 | 0,181 | 0,163 | 1 |
| Pcdh10    | 0,283495 | -0,03731 | 0,518 | 0,525 | 1 |
| B3galt4   | 0,283519 | -0,01421 | 0,078 | 0,093 | 1 |
| Clic1     | 0,283536 | 0,009297 | 0,043 | 0,033 | 1 |
| Tmem254a  | 0,283666 | 0,011847 | 0,041 | 0,031 | 1 |
| Rab23     | 0,283707 | -0,02242 | 0,3   | 0,33  | 1 |
| Cables2   | 0,283883 | 0,018856 | 0,076 | 0,062 | 1 |
| Col16a1   | 0,283974 | -0,03358 | 0,271 | 0,296 | 1 |
| Cct8      | 0,284005 | -0,0214  | 0,81  | 0,829 | 1 |
| Smim20    | 0,284015 | -0,03213 | 0,455 | 0,48  | 1 |
| Borcs6    | 0,284122 | -0,01902 | 0,351 | 0,384 | 1 |
| Riok1     | 0,284185 | -0,01496 | 0,336 | 0,364 | 1 |
| Git2      | 0,284192 | -0,03759 | 0,588 | 0,598 | 1 |
| Ccdc13    | 0,284262 | 0,045152 | 0,591 | 0,564 | 1 |
| Plpp5     | 0,284274 | 0,010577 | 0,041 | 0,031 | 1 |
| Yme1l1    | 0,284282 | 0,049425 | 0,597 | 0,579 | 1 |
| Fermt2    | 0,284415 | -0,02358 | 0,965 | 0,963 | 1 |
| Retreg2   | 0,284444 | 0,043054 | 0,731 | 0,722 | 1 |
| Brk1      | 0,284459 | -0,01446 | 0,905 | 0,909 | 1 |
| Nfu1      | 0,284504 | -0,02781 | 0,364 | 0,389 | 1 |
| Cramp1l   | 0,284609 | -0,01777 | 0,201 | 0,224 | 1 |
| E430018J2 | 0,284672 | 0,014879 | 0,054 | 0,042 | 1 |
| Dmap1     | 0,284679 | -0,01579 | 0,283 | 0,309 | 1 |

|           |          |          |       |       |   |
|-----------|----------|----------|-------|-------|---|
| Zfr2      | 0,284701 | 0,025673 | 0,11  | 0,094 | 1 |
| Ficd      | 0,284774 | -0,02129 | 0,116 | 0,133 | 1 |
| Heatr6    | 0,284914 | -0,01927 | 0,294 | 0,322 | 1 |
| Zfp974    | 0,285406 | -0,01541 | 0,08  | 0,096 | 1 |
| Wisp2     | 0,285473 | -0,00516 | 0,003 | 0,007 | 1 |
| Gpr174    | 0,285473 | -0,00516 | 0,003 | 0,007 | 1 |
| Apoh      | 0,285473 | -0,00516 | 0,003 | 0,007 | 1 |
| Pcdhga2   | 0,285473 | -0,00516 | 0,003 | 0,007 | 1 |
| Unc5d     | 0,28569  | -0,00579 | 0,003 | 0,007 | 1 |
| Epb4112   | 0,285696 | -0,02528 | 0,832 | 0,842 | 1 |
| Dnajc28   | 0,28578  | 0,012754 | 0,041 | 0,031 | 1 |
| Hs6st1    | 0,285825 | -0,03271 | 0,309 | 0,33  | 1 |
| Alg9      | 0,285843 | -0,00606 | 0,204 | 0,229 | 1 |
| Gm48371   | 0,285887 | -0,01414 | 0,02  | 0,028 | 1 |
| Gata6     | 0,285906 | -0,00642 | 0,003 | 0,007 | 1 |
| Ccm2      | 0,286001 | 0,008577 | 0,278 | 0,249 | 1 |
| Rnf123    | 0,286014 | -0,02285 | 0,189 | 0,21  | 1 |
| Ccdc150   | 0,28612  | -0,00354 | 0,003 | 0,007 | 1 |
| 6820408C: | 0,28612  | -0,00354 | 0,003 | 0,007 | 1 |
| Cpne1     | 0,28612  | -0,00354 | 0,003 | 0,007 | 1 |
| Tmod4     | 0,28612  | -0,00354 | 0,003 | 0,007 | 1 |
| Extl1     | 0,28612  | -0,00354 | 0,003 | 0,007 | 1 |
| Ppp2r2cos | 0,28612  | -0,00354 | 0,003 | 0,007 | 1 |
| 0610040JC | 0,28612  | -0,00354 | 0,003 | 0,007 | 1 |
| Tmem130   | 0,28612  | -0,00354 | 0,003 | 0,007 | 1 |
| Vmn2r29   | 0,28612  | -0,00354 | 0,003 | 0,007 | 1 |
| Olfir715b | 0,28612  | -0,00354 | 0,003 | 0,007 | 1 |
| Fam57b    | 0,28612  | -0,00354 | 0,003 | 0,007 | 1 |
| Tmem200a  | 0,28612  | -0,00354 | 0,003 | 0,007 | 1 |
| Pbld2     | 0,28612  | -0,00354 | 0,003 | 0,007 | 1 |
| Gm15319   | 0,28612  | -0,00354 | 0,003 | 0,007 | 1 |
| Pnoc      | 0,28612  | -0,00354 | 0,003 | 0,007 | 1 |
| Gm41183   | 0,28612  | -0,00354 | 0,003 | 0,007 | 1 |
| Scel      | 0,28612  | -0,00354 | 0,003 | 0,007 | 1 |
| 4930525G: | 0,28612  | -0,00354 | 0,003 | 0,007 | 1 |
| Ckmt2     | 0,28612  | -0,00354 | 0,003 | 0,007 | 1 |
| Abi3bp    | 0,28612  | -0,00354 | 0,003 | 0,007 | 1 |
| Pcdhb2    | 0,28612  | -0,00354 | 0,003 | 0,007 | 1 |
| Wdcp      | 0,286163 | -0,0208  | 0,216 | 0,239 | 1 |
| Ttc21b    | 0,28626  | 0,036198 | 0,131 | 0,114 | 1 |
| Arhgef26  | 0,286337 | -0,00418 | 0,003 | 0,007 | 1 |
| Ephx2     | 0,286337 | -0,00418 | 0,003 | 0,007 | 1 |
| Gm27209   | 0,286337 | -0,00418 | 0,003 | 0,007 | 1 |
| Sox10     | 0,286382 | -0,00617 | 0,997 | 1     | 1 |
| Rps3      | 0,286391 | 0,026311 | 0,996 | 0,993 | 1 |
| Tmem178   | 0,286554 | -0,00223 | 0,003 | 0,007 | 1 |
| Tuba1b    | 0,286585 | 0,076713 | 0,8   | 0,813 | 1 |
| Spcs1     | 0,286612 | -0,00331 | 0,897 | 0,896 | 1 |
| Tubgcp4   | 0,286643 | -0,00544 | 0,246 | 0,275 | 1 |
| Ptk2b     | 0,286652 | -0,00838 | 0,039 | 0,05  | 1 |
| Plin3     | 0,286766 | -0,09357 | 0,727 | 0,715 | 1 |
| Ccnk      | 0,286973 | -0,03661 | 0,335 | 0,351 | 1 |

|           |          |          |       |       |   |
|-----------|----------|----------|-------|-------|---|
| Ly6g5b    | 0,286986 | -0,00159 | 0,003 | 0,007 | 1 |
| Snph      | 0,286986 | -0,00257 | 0,003 | 0,007 | 1 |
| Tmem106a  | 0,286986 | -0,00257 | 0,003 | 0,007 | 1 |
| Bloc1s2   | 0,287012 | -0,02773 | 0,43  | 0,452 | 1 |
| Gm49375   | 0,287098 | 0,021615 | 0,067 | 0,054 | 1 |
| Sars2     | 0,287148 | 0,017533 | 0,113 | 0,096 | 1 |
| Pdia4     | 0,287288 | -0,04225 | 0,603 | 0,613 | 1 |
| Tmem101   | 0,287384 | 0,028422 | 0,499 | 0,478 | 1 |
| Kdm5a     | 0,287397 | 0,040819 | 0,621 | 0,6   | 1 |
| Prss35    | 0,28742  | -0,00125 | 0,003 | 0,007 | 1 |
| Ep300     | 0,287693 | 0,045292 | 0,556 | 0,54  | 1 |
| Nop14     | 0,287866 | 0,037801 | 0,318 | 0,291 | 1 |
| Tbc1d2    | 0,28792  | -0,00797 | 0,026 | 0,036 | 1 |
| L3mbtl3   | 0,28793  | -0,00102 | 0,03  | 0,041 | 1 |
| Wee1      | 0,288042 | 0,005221 | 0,005 | 0,002 | 1 |
| Il17rd    | 0,288042 | 0,005221 | 0,005 | 0,002 | 1 |
| Ephb3     | 0,288042 | 0,005221 | 0,005 | 0,002 | 1 |
| H2-Ab1    | 0,288042 | 0,005221 | 0,005 | 0,002 | 1 |
| Gm16233   | 0,288042 | 0,007169 | 0,005 | 0,002 | 1 |
| Slc7a5    | 0,288042 | 0,007169 | 0,005 | 0,002 | 1 |
| Fgf18     | 0,288042 | 0,006195 | 0,005 | 0,002 | 1 |
| Dcp2      | 0,288049 | -0,01945 | 0,143 | 0,163 | 1 |
| Rpl24     | 0,288246 | -0,01464 | 0,994 | 1     | 1 |
| Tbc1d30   | 0,288268 | 0,019054 | 0,037 | 0,028 | 1 |
| Mical1    | 0,288276 | 0,010083 | 0,005 | 0,002 | 1 |
| Cd24a     | 0,288276 | 0,007169 | 0,005 | 0,002 | 1 |
| Ttll8     | 0,288276 | 0,007169 | 0,005 | 0,002 | 1 |
| Lcn11     | 0,288276 | 0,006195 | 0,005 | 0,002 | 1 |
| Zmynd10   | 0,288276 | 0,006195 | 0,005 | 0,002 | 1 |
| Hrk       | 0,288276 | 0,005221 | 0,005 | 0,002 | 1 |
| Nynrin    | 0,288276 | 0,005221 | 0,005 | 0,002 | 1 |
| Gm26511   | 0,288276 | 0,005221 | 0,005 | 0,002 | 1 |
| Exo1      | 0,288276 | 0,004246 | 0,005 | 0,002 | 1 |
| Disp1     | 0,288276 | 0,004246 | 0,005 | 0,002 | 1 |
| Fam166b   | 0,288276 | 0,004246 | 0,005 | 0,002 | 1 |
| Gm9754    | 0,288276 | 0,004246 | 0,005 | 0,002 | 1 |
| Slitrk1   | 0,288276 | 0,004246 | 0,005 | 0,002 | 1 |
| Gm36198   | 0,288276 | 0,004246 | 0,005 | 0,002 | 1 |
| 4930556J2 | 0,288276 | 0,004246 | 0,005 | 0,002 | 1 |
| Tbx4      | 0,288276 | 0,004246 | 0,005 | 0,002 | 1 |
| Nrsn1     | 0,288276 | 0,004246 | 0,005 | 0,002 | 1 |
| Tshr      | 0,288276 | 0,004246 | 0,005 | 0,002 | 1 |
| Gng13     | 0,288276 | 0,004246 | 0,005 | 0,002 | 1 |
| Sgo1      | 0,288276 | 0,004246 | 0,005 | 0,002 | 1 |
| 2010110K: | 0,288276 | 0,004246 | 0,005 | 0,002 | 1 |
| Ticam2    | 0,288276 | 0,004246 | 0,005 | 0,002 | 1 |
| Hrasls5   | 0,288276 | 0,004246 | 0,005 | 0,002 | 1 |
| Nab1      | 0,288324 | -0,01876 | 0,398 | 0,429 | 1 |
| Tango2    | 0,288402 | -0,01607 | 0,336 | 0,364 | 1 |
| Crls1     | 0,288454 | -0,01962 | 0,319 | 0,346 | 1 |
| Mrpl20    | 0,288499 | -0,02416 | 0,816 | 0,846 | 1 |
| Tbc1d22a  | 0,288505 | -0,01721 | 0,183 | 0,205 | 1 |

|           |          |          |       |       |   |
|-----------|----------|----------|-------|-------|---|
| Spag6     | 0,28851  | 0,00327  | 0,005 | 0,002 | 1 |
| Dlx1as    | 0,28851  | 0,00327  | 0,005 | 0,002 | 1 |
| Olf1191-p | 0,28851  | 0,00327  | 0,005 | 0,002 | 1 |
| BC016548  | 0,28851  | 0,00327  | 0,005 | 0,002 | 1 |
| Samd10    | 0,28851  | 0,00327  | 0,005 | 0,002 | 1 |
| Pfkfb1    | 0,28851  | 0,00327  | 0,005 | 0,002 | 1 |
| Gpx7      | 0,28851  | 0,00327  | 0,005 | 0,002 | 1 |
| Dmrta2    | 0,28851  | 0,00327  | 0,005 | 0,002 | 1 |
| Gm9970    | 0,28851  | 0,00327  | 0,005 | 0,002 | 1 |
| Gm43136   | 0,28851  | 0,00327  | 0,005 | 0,002 | 1 |
| Hepacam2  | 0,28851  | 0,00327  | 0,005 | 0,002 | 1 |
| Irf5      | 0,28851  | 0,00327  | 0,005 | 0,002 | 1 |
| Lsr       | 0,28851  | 0,00327  | 0,005 | 0,002 | 1 |
| Gm44647   | 0,28851  | 0,00327  | 0,005 | 0,002 | 1 |
| Cfap46    | 0,28851  | 0,00327  | 0,005 | 0,002 | 1 |
| Elk3      | 0,28851  | 0,00327  | 0,005 | 0,002 | 1 |
| Tnfsf13b  | 0,28851  | 0,00327  | 0,005 | 0,002 | 1 |
| 4930594M  | 0,28851  | 0,00327  | 0,005 | 0,002 | 1 |
| A930006LC | 0,28851  | 0,00327  | 0,005 | 0,002 | 1 |
| Tdgf1     | 0,28851  | 0,00327  | 0,005 | 0,002 | 1 |
| Gm28048   | 0,28851  | 0,00327  | 0,005 | 0,002 | 1 |
| Vmo1      | 0,28851  | 0,00327  | 0,005 | 0,002 | 1 |
| Gm11437   | 0,28851  | 0,00327  | 0,005 | 0,002 | 1 |
| 1700125H: | 0,28851  | 0,00327  | 0,005 | 0,002 | 1 |
| Hoxb7     | 0,28851  | 0,00327  | 0,005 | 0,002 | 1 |
| Hoxb2     | 0,28851  | 0,00327  | 0,005 | 0,002 | 1 |
| Cdc6      | 0,28851  | 0,00327  | 0,005 | 0,002 | 1 |
| Gm11361   | 0,28851  | 0,00327  | 0,005 | 0,002 | 1 |
| A330048O  | 0,28851  | 0,00327  | 0,005 | 0,002 | 1 |
| Gm31508   | 0,28851  | 0,00327  | 0,005 | 0,002 | 1 |
| Nudt8     | 0,28851  | 0,00327  | 0,005 | 0,002 | 1 |
| Clip2     | 0,288556 | 0,044774 | 0,72  | 0,72  | 1 |
| Fech      | 0,288639 | -0,01871 | 0,635 | 0,652 | 1 |
| Cox10     | 0,288646 | -0,01326 | 0,117 | 0,135 | 1 |
| Cndp1     | 0,288746 | 0,006519 | 0,005 | 0,002 | 1 |
| Pop4      | 0,288795 | -0,02398 | 0,604 | 0,636 | 1 |
| Hmox1     | 0,288922 | 0,037538 | 0,127 | 0,111 | 1 |
| Hoxa4     | 0,288945 | -0,02527 | 0,26  | 0,283 | 1 |
| Ubxn1     | 0,289106 | 0,030761 | 0,966 | 0,954 | 1 |
| Smim6     | 0,289215 | 0,005547 | 0,005 | 0,002 | 1 |
| Gm43403   | 0,289215 | 0,003599 | 0,005 | 0,002 | 1 |
| Snrpb     | 0,289237 | 0,030638 | 0,894 | 0,873 | 1 |
| Gad2      | 0,28945  | 0,002624 | 0,005 | 0,002 | 1 |
| 2700069I1 | 0,28945  | 0,002624 | 0,005 | 0,002 | 1 |
| Ets1      | 0,28945  | 0,002624 | 0,005 | 0,002 | 1 |
| Pth1r     | 0,28945  | 0,002624 | 0,005 | 0,002 | 1 |
| Kctd2     | 0,289524 | 0,037052 | 0,619 | 0,595 | 1 |
| Kctd20    | 0,289616 | 0,037993 | 0,294 | 0,275 | 1 |
| Pou3f2    | 0,289685 | 0,001648 | 0,005 | 0,002 | 1 |
| Gm47598   | 0,289685 | 0,001648 | 0,005 | 0,002 | 1 |
| Ciita     | 0,289685 | 0,001648 | 0,005 | 0,002 | 1 |
| Wnt11     | 0,289685 | -0,00159 | 0,005 | 0,002 | 1 |

|           |          |          |       |       |   |
|-----------|----------|----------|-------|-------|---|
| Nop10     | 0,289724 | 0,039173 | 0,551 | 0,528 | 1 |
| Ston2     | 0,28986  | -0,02799 | 0,327 | 0,346 | 1 |
| Rps24     | 0,290015 | 0,021194 | 0,998 | 0,998 | 1 |
| Rplp2     | 0,290134 | 0,025806 | 0,992 | 0,997 | 1 |
| Zdhhc7    | 0,290209 | 0,017679 | 0,172 | 0,151 | 1 |
| Arfgef1   | 0,290254 | -0,02878 | 0,595 | 0,608 | 1 |
| Nsfl1c    | 0,290262 | 0,026808 | 0,661 | 0,646 | 1 |
| Agap3     | 0,290392 | 0,030376 | 0,386 | 0,364 | 1 |
| Copg1     | 0,290486 | -0,03586 | 0,377 | 0,4   | 1 |
| Nfatc2ip  | 0,290648 | -0,02911 | 0,103 | 0,119 | 1 |
| Rdh14     | 0,290706 | -0,00726 | 0,23  | 0,257 | 1 |
| Apln      | 0,290729 | -0,02614 | 0,375 | 0,407 | 1 |
| Hist1h2bc | 0,29077  | 0,080803 | 0,861 | 0,873 | 1 |
| Gm4285    | 0,290859 | 0,017075 | 0,05  | 0,039 | 1 |
| D430042O  | 0,290867 | -0,02533 | 0,241 | 0,267 | 1 |
| Gspt1     | 0,290934 | -0,02103 | 0,743 | 0,774 | 1 |
| Ufm1      | 0,290995 | 0,033331 | 0,512 | 0,502 | 1 |
| Zcrb1     | 0,291057 | -0,02098 | 0,685 | 0,722 | 1 |
| Nup205    | 0,291187 | -0,01611 | 0,152 | 0,172 | 1 |
| Smim15    | 0,291342 | -0,01312 | 0,786 | 0,829 | 1 |
| Iscu      | 0,291458 | -0,03391 | 0,461 | 0,486 | 1 |
| Gm46447   | 0,291668 | -0,01022 | 0,057 | 0,07  | 1 |
| Optn      | 0,29177  | 0,042168 | 0,371 | 0,354 | 1 |
| Ypel4     | 0,291796 | -0,0175  | 0,116 | 0,133 | 1 |
| Pla2g15   | 0,291798 | -0,00852 | 0,054 | 0,067 | 1 |
| Epm2a     | 0,29182  | -0,02279 | 0,121 | 0,138 | 1 |
| Sp1       | 0,291825 | 0,04754  | 0,483 | 0,475 | 1 |
| Fcho1     | 0,291922 | -0,0129  | 0,048 | 0,06  | 1 |
| Abhd16a   | 0,292051 | 0,035885 | 0,542 | 0,53  | 1 |
| Gon4l     | 0,292092 | -0,03163 | 0,384 | 0,405 | 1 |
| Rnf40     | 0,292109 | -0,01039 | 0,201 | 0,226 | 1 |
| Itm2b     | 0,292238 | -0,01346 | 0,999 | 1     | 1 |
| Szt2      | 0,292638 | -0,02008 | 0,139 | 0,158 | 1 |
| Kidins220 | 0,292663 | -0,02118 | 0,721 | 0,745 | 1 |
| Csnk1a1   | 0,292754 | -0,0185  | 0,992 | 1     | 1 |
| Ypel3     | 0,292901 | -0,017   | 0,908 | 0,93  | 1 |
| Bmi1      | 0,292904 | 0,043326 | 0,513 | 0,496 | 1 |
| BC024978  | 0,292922 | -0,01208 | 0,103 | 0,12  | 1 |
| Col20a1   | 0,292929 | 0,010062 | 0,012 | 0,007 | 1 |
| Prodh     | 0,292929 | 0,012954 | 0,012 | 0,007 | 1 |
| Gm40841   | 0,29296  | -0,00749 | 0,02  | 0,028 | 1 |
| Cbx5      | 0,293029 | 0,031404 | 0,666 | 0,655 | 1 |
| Rassf3    | 0,293087 | 0,020138 | 0,107 | 0,091 | 1 |
| Ogfr      | 0,293196 | -0,03979 | 0,374 | 0,393 | 1 |
| Slc9a8    | 0,293327 | 0,024938 | 0,265 | 0,242 | 1 |
| Ints12    | 0,293463 | -0,01586 | 0,114 | 0,132 | 1 |
| 4930404N  | 0,293511 | 0,007162 | 0,012 | 0,007 | 1 |
| Pcdha4    | 0,293511 | 0,007162 | 0,012 | 0,007 | 1 |
| Rpl29     | 0,293811 | -0,02625 | 0,966 | 0,971 | 1 |
| Abcf1     | 0,293837 | -0,02114 | 0,725 | 0,771 | 1 |
| Gjb1      | 0,294006 | -0,00431 | 0,977 | 0,974 | 1 |
| C2cd2     | 0,294084 | -0,02734 | 0,206 | 0,228 | 1 |



|           |          |          |       |       |   |
|-----------|----------|----------|-------|-------|---|
| Gm49396   | 0,294093 | 0,007162 | 0,012 | 0,007 | 1 |
| Gm16867   | 0,294093 | 0,006194 | 0,012 | 0,007 | 1 |
| Strap     | 0,294106 | -0,02628 | 0,681 | 0,699 | 1 |
| Tbc1d15   | 0,294266 | -0,02433 | 0,7   | 0,717 | 1 |
| Clec2d    | 0,29439  | 0,011624 | 0,012 | 0,007 | 1 |
| Ctnnd1    | 0,29446  | -0,01178 | 0,439 | 0,473 | 1 |
| Ncoa2     | 0,294491 | -0,01656 | 0,556 | 0,587 | 1 |
| Pym1      | 0,294507 | -0,0205  | 0,151 | 0,171 | 1 |
| Sod2      | 0,294524 | -0,01861 | 0,557 | 0,58  | 1 |
| Ndufs3    | 0,294664 | -0,02321 | 0,644 | 0,685 | 1 |
| Map9      | 0,294826 | 0,00961  | 0,111 | 0,094 | 1 |
| Tmem27    | 0,294889 | -0,00495 | 0,02  | 0,028 | 1 |
| Btbd1     | 0,294925 | -0,02111 | 0,587 | 0,621 | 1 |
| Prpsap2   | 0,294965 | -0,00608 | 0,372 | 0,41  | 1 |
| 6720489N  | 0,295175 | -0,01738 | 0,068 | 0,081 | 1 |
| Mbd4      | 0,295264 | -0,00329 | 0,076 | 0,091 | 1 |
| Gm15545   | 0,295436 | 0,01218  | 0,035 | 0,026 | 1 |
| Nedd4     | 0,29546  | -0,02144 | 0,966 | 0,967 | 1 |
| Pi4k2b    | 0,295701 | -0,01849 | 0,125 | 0,143 | 1 |
| Gorab     | 0,295732 | -0,01581 | 0,127 | 0,145 | 1 |
| Dhrs4     | 0,295775 | -0,02394 | 0,215 | 0,236 | 1 |
| P2rx7     | 0,295846 | -0,02288 | 0,272 | 0,294 | 1 |
| Ptdss1    | 0,295859 | -0,0109  | 0,462 | 0,506 | 1 |
| Erp29     | 0,296306 | -0,01136 | 0,717 | 0,746 | 1 |
| Unc79     | 0,296541 | -0,00495 | 0,02  | 0,028 | 1 |
| Mgrn1     | 0,296581 | -0,01115 | 0,501 | 0,538 | 1 |
| Saal1     | 0,296632 | -0,01772 | 0,116 | 0,133 | 1 |
| Slc5a3    | 0,296648 | 0,050323 | 0,584 | 0,546 | 1 |
| Actr6     | 0,296765 | -0,01859 | 0,309 | 0,335 | 1 |
| Kmt5b     | 0,296819 | 0,045255 | 0,559 | 0,545 | 1 |
| Mzt1      | 0,29697  | -0,03043 | 0,405 | 0,434 | 1 |
| Clpb      | 0,297305 | -0,02976 | 0,376 | 0,398 | 1 |
| Zfp770    | 0,297689 | 0,025908 | 0,199 | 0,179 | 1 |
| Psmc5     | 0,297697 | -0,01992 | 0,794 | 0,802 | 1 |
| Nicn1     | 0,297742 | -0,01597 | 0,295 | 0,322 | 1 |
| Tmem86a   | 0,297827 | 0,012515 | 0,033 | 0,024 | 1 |
| Pno1      | 0,297841 | -0,02318 | 0,323 | 0,346 | 1 |
| Bbc3      | 0,297987 | 0,02101  | 0,128 | 0,111 | 1 |
| Hoxd4.1   | 0,298199 | -0,00399 | 0,02  | 0,028 | 1 |
| Zfp780b   | 0,298251 | -0,0326  | 0,205 | 0,224 | 1 |
| Zfp281    | 0,298256 | 0,050651 | 0,681 | 0,672 | 1 |
| Tbca      | 0,298269 | -0,02718 | 0,55  | 0,574 | 1 |
| Galnt6    | 0,298386 | -0,03195 | 0,864 | 0,885 | 1 |
| Pigs      | 0,298448 | -0,0229  | 0,375 | 0,4   | 1 |
| AC152827. | 0,298603 | 0,01218  | 0,033 | 0,024 | 1 |
| Celf6     | 0,298721 | -0,0055  | 0,001 | 0,003 | 1 |
| Gm48952   | 0,298721 | -0,0055  | 0,001 | 0,003 | 1 |
| Hsd17b11  | 0,298726 | -0,00398 | 0,625 | 0,672 | 1 |
| Ddx24     | 0,298804 | -0,02267 | 0,794 | 0,821 | 1 |
| Rassf8    | 0,298877 | -0,02806 | 0,458 | 0,489 | 1 |
| Mcrip2    | 0,298913 | -0,01207 | 0,094 | 0,111 | 1 |
| D930016D  | 0,298965 | -0,0227  | 0,192 | 0,215 | 1 |

|            |          |          |       |       |   |
|------------|----------|----------|-------|-------|---|
| Siglec1    | 0,299061 | -0,00389 | 0,001 | 0,003 | 1 |
| Medag      | 0,299061 | -0,00389 | 0,001 | 0,003 | 1 |
| Lsp1       | 0,299061 | -0,00389 | 0,001 | 0,003 | 1 |
| Itgae      | 0,299061 | -0,00389 | 0,001 | 0,003 | 1 |
| Nptx1      | 0,299061 | -0,00389 | 0,001 | 0,003 | 1 |
| Flrt2      | 0,299061 | -0,00389 | 0,001 | 0,003 | 1 |
| Rab15      | 0,299061 | -0,0055  | 0,001 | 0,003 | 1 |
| Ccdc30     | 0,299061 | -0,00712 | 0,001 | 0,003 | 1 |
| Twf2       | 0,299189 | -0,01725 | 0,269 | 0,296 | 1 |
| Timm8a1    | 0,299238 | 0,039319 | 0,368 | 0,351 | 1 |
| G6pc3      | 0,299269 | -0,01059 | 0,429 | 0,462 | 1 |
| Pja1       | 0,299324 | -0,019   | 0,563 | 0,58  | 1 |
| Slc25a22   | 0,299325 | 0,016576 | 0,093 | 0,078 | 1 |
| Sp140      | 0,2994   | -0,00227 | 0,001 | 0,003 | 1 |
| Map3k19    | 0,2994   | -0,00227 | 0,001 | 0,003 | 1 |
| Klhdc9     | 0,2994   | -0,00227 | 0,001 | 0,003 | 1 |
| Sapcd2     | 0,2994   | -0,00227 | 0,001 | 0,003 | 1 |
| Card9      | 0,2994   | -0,00227 | 0,001 | 0,003 | 1 |
| Traf1      | 0,2994   | -0,00227 | 0,001 | 0,003 | 1 |
| Ptgs1      | 0,2994   | -0,00227 | 0,001 | 0,003 | 1 |
| Gm26558    | 0,2994   | -0,00227 | 0,001 | 0,003 | 1 |
| Calcr1     | 0,2994   | -0,00227 | 0,001 | 0,003 | 1 |
| Adam33     | 0,2994   | -0,00227 | 0,001 | 0,003 | 1 |
| Nrsn2      | 0,2994   | -0,00227 | 0,001 | 0,003 | 1 |
| Cdh22      | 0,2994   | -0,00227 | 0,001 | 0,003 | 1 |
| Gpr82      | 0,2994   | -0,00227 | 0,001 | 0,003 | 1 |
| Dcaf12l1   | 0,2994   | -0,00227 | 0,001 | 0,003 | 1 |
| Gabre      | 0,2994   | -0,00227 | 0,001 | 0,003 | 1 |
| Arhgap6    | 0,2994   | -0,00227 | 0,001 | 0,003 | 1 |
| Gm16337    | 0,2994   | -0,00227 | 0,001 | 0,003 | 1 |
| Mir124-2h1 | 0,2994   | -0,00227 | 0,001 | 0,003 | 1 |
| Efna3      | 0,2994   | -0,00227 | 0,001 | 0,003 | 1 |
| Kcnc4      | 0,2994   | -0,00227 | 0,001 | 0,003 | 1 |
| Car8       | 0,2994   | -0,00227 | 0,001 | 0,003 | 1 |
| Bach2os    | 0,2994   | -0,00227 | 0,001 | 0,003 | 1 |
| Kif2c      | 0,2994   | -0,00227 | 0,001 | 0,003 | 1 |
| Dlgap3     | 0,2994   | -0,00227 | 0,001 | 0,003 | 1 |
| Miat       | 0,2994   | -0,00227 | 0,001 | 0,003 | 1 |
| Mdfic      | 0,2994   | -0,00227 | 0,001 | 0,003 | 1 |
| Prr15      | 0,2994   | -0,00227 | 0,001 | 0,003 | 1 |
| 0610040Fc  | 0,2994   | -0,00227 | 0,001 | 0,003 | 1 |
| Mfap5      | 0,2994   | -0,00227 | 0,001 | 0,003 | 1 |
| Apobec1    | 0,2994   | -0,00227 | 0,001 | 0,003 | 1 |
| Pianp      | 0,2994   | -0,00227 | 0,001 | 0,003 | 1 |
| Grin2d     | 0,2994   | -0,00227 | 0,001 | 0,003 | 1 |
| BC046251   | 0,2994   | -0,00227 | 0,001 | 0,003 | 1 |
| Calca      | 0,2994   | -0,00227 | 0,001 | 0,003 | 1 |
| Samd5      | 0,2994   | -0,00227 | 0,001 | 0,003 | 1 |
| Gstt1      | 0,2994   | -0,00227 | 0,001 | 0,003 | 1 |
| Smim24     | 0,2994   | -0,00227 | 0,001 | 0,003 | 1 |
| Ptpr       | 0,2994   | -0,00227 | 0,001 | 0,003 | 1 |
| Fam155a    | 0,2994   | -0,00227 | 0,001 | 0,003 | 1 |

|           |          |          |       |       |   |
|-----------|----------|----------|-------|-------|---|
| Gm26632   | 0,2994   | -0,00227 | 0,001 | 0,003 | 1 |
| Nrp1      | 0,2994   | -0,00227 | 0,001 | 0,003 | 1 |
| 4930579G  | 0,2994   | -0,00227 | 0,001 | 0,003 | 1 |
| Ebf2      | 0,2994   | -0,00227 | 0,001 | 0,003 | 1 |
| Scn2b     | 0,2994   | -0,00227 | 0,001 | 0,003 | 1 |
| Skor1     | 0,2994   | -0,00227 | 0,001 | 0,003 | 1 |
| Gm47270   | 0,2994   | -0,00227 | 0,001 | 0,003 | 1 |
| Rbpms2    | 0,2994   | -0,00227 | 0,001 | 0,003 | 1 |
| Rab27a    | 0,2994   | -0,00227 | 0,001 | 0,003 | 1 |
| Tbkbp1    | 0,2994   | -0,00227 | 0,001 | 0,003 | 1 |
| Hist1h2bg | 0,2994   | -0,00227 | 0,001 | 0,003 | 1 |
| Ly6e      | 0,2994   | -0,00227 | 0,001 | 0,003 | 1 |
| Itgb7     | 0,2994   | -0,00227 | 0,001 | 0,003 | 1 |
| Nrros     | 0,2994   | -0,00227 | 0,001 | 0,003 | 1 |
| Cxadr     | 0,2994   | -0,00227 | 0,001 | 0,003 | 1 |
| Gm11131   | 0,2994   | -0,00227 | 0,001 | 0,003 | 1 |
| Rgp1      | 0,299423 | 0,025086 | 0,149 | 0,132 | 1 |
| Zfp318    | 0,29951  | -0,02348 | 0,298 | 0,322 | 1 |
| Zfp114    | 0,299701 | -0,01055 | 0,057 | 0,07  | 1 |
| Zcchc12   | 0,29974  | -0,00291 | 0,001 | 0,003 | 1 |
| Evpl      | 0,29974  | -0,00291 | 0,001 | 0,003 | 1 |
| Adat2     | 0,300015 | -0,01521 | 0,071 | 0,085 | 1 |
| Slc23a2   | 0,300043 | -0,03559 | 0,205 | 0,223 | 1 |
| Tmprss7   | 0,300081 | 0,000671 | 0,001 | 0,003 | 1 |
| Atg9b     | 0,300081 | -0,00031 | 0,001 | 0,003 | 1 |
| Adm       | 0,300081 | -0,00031 | 0,001 | 0,003 | 1 |
| Ptpru     | 0,300081 | -0,00129 | 0,001 | 0,003 | 1 |
| Hpgd      | 0,300081 | -0,00129 | 0,001 | 0,003 | 1 |
| 5033426O  | 0,300081 | -0,00129 | 0,001 | 0,003 | 1 |
| Gpc6      | 0,300081 | -0,00129 | 0,001 | 0,003 | 1 |
| Ankzf1    | 0,300324 | 0,021138 | 0,153 | 0,135 | 1 |
| Man1a     | 0,300416 | -0,01158 | 0,113 | 0,094 | 1 |
| 9430015G  | 0,300429 | -0,00802 | 0,109 | 0,127 | 1 |
| Gbp5      | 0,300632 | -0,00775 | 0,002 | 0,005 | 1 |
| Ifi47     | 0,300632 | -0,01957 | 0,002 | 0,005 | 1 |
| Cebpg     | 0,300897 | -0,00183 | 0,429 | 0,463 | 1 |
| Strip2    | 0,300925 | 0,013355 | 0,035 | 0,026 | 1 |
| Thoc7     | 0,30095  | -0,0165  | 0,458 | 0,483 | 1 |
| Cfap20    | 0,300962 | 0,031513 | 0,397 | 0,374 | 1 |
| Fmnl3     | 0,301055 | -0,00574 | 0,029 | 0,039 | 1 |
| Gm28981   | 0,30116  | -0,00452 | 0,002 | 0,005 | 1 |
| Gm14401   | 0,30116  | -0,00452 | 0,002 | 0,005 | 1 |
| Crybb3    | 0,30116  | -0,00452 | 0,002 | 0,005 | 1 |
| 5730422E  | 0,30116  | -0,00452 | 0,002 | 0,005 | 1 |
| Klhl33    | 0,30116  | -0,00452 | 0,002 | 0,005 | 1 |
| Gm11963   | 0,30116  | -0,00452 | 0,002 | 0,005 | 1 |
| Gm10447   | 0,30116  | -0,00452 | 0,002 | 0,005 | 1 |
| Gm20324   | 0,30116  | -0,00452 | 0,002 | 0,005 | 1 |
| Gm29019   | 0,30116  | -0,00452 | 0,002 | 0,005 | 1 |
| Zfp57     | 0,30116  | -0,00452 | 0,002 | 0,005 | 1 |
| Kcnj3     | 0,30116  | -0,00936 | 0,002 | 0,005 | 1 |
| Gab1      | 0,3012   | 0,031414 | 0,966 | 0,95  | 1 |

|           |          |          |       |       |   |
|-----------|----------|----------|-------|-------|---|
| Ddx3x     | 0,301233 | 0,090967 | 0,818 | 0,816 | 1 |
| Bpnt1     | 0,301261 | -0,01616 | 0,626 | 0,657 | 1 |
| Yy1       | 0,30129  | -0,02012 | 0,747 | 0,777 | 1 |
| Tceanc    | 0,301326 | 0,010365 | 0,086 | 0,072 | 1 |
| 0610043K: | 0,301425 | -0,00516 | 0,002 | 0,005 | 1 |
| Gm38033   | 0,301689 | -0,00291 | 0,002 | 0,005 | 1 |
| Pkp1      | 0,301689 | -0,00291 | 0,002 | 0,005 | 1 |
| Cd247     | 0,301689 | -0,00291 | 0,002 | 0,005 | 1 |
| Esrrg     | 0,301689 | -0,00291 | 0,002 | 0,005 | 1 |
| Dlx1      | 0,301689 | -0,00291 | 0,002 | 0,005 | 1 |
| Pde1a     | 0,301689 | -0,00291 | 0,002 | 0,005 | 1 |
| Oip5      | 0,301689 | -0,00291 | 0,002 | 0,005 | 1 |
| Gm14978   | 0,301689 | -0,00291 | 0,002 | 0,005 | 1 |
| Pax1      | 0,301689 | -0,00291 | 0,002 | 0,005 | 1 |
| Vstm2l    | 0,301689 | -0,00291 | 0,002 | 0,005 | 1 |
| Eda       | 0,301689 | -0,00291 | 0,002 | 0,005 | 1 |
| C030034L1 | 0,301689 | -0,00291 | 0,002 | 0,005 | 1 |
| Ccna2     | 0,301689 | -0,00291 | 0,002 | 0,005 | 1 |
| Gm20633   | 0,301689 | -0,00291 | 0,002 | 0,005 | 1 |
| Bcl2l15   | 0,301689 | -0,00291 | 0,002 | 0,005 | 1 |
| Matn1     | 0,301689 | -0,00291 | 0,002 | 0,005 | 1 |
| Lhx5      | 0,301689 | -0,00291 | 0,002 | 0,005 | 1 |
| Slc4a5    | 0,301689 | -0,00291 | 0,002 | 0,005 | 1 |
| Cxcl12    | 0,301689 | -0,00291 | 0,002 | 0,005 | 1 |
| Gm15687   | 0,301689 | -0,00291 | 0,002 | 0,005 | 1 |
| C5ar2     | 0,301689 | -0,00291 | 0,002 | 0,005 | 1 |
| Hif3a     | 0,301689 | -0,00291 | 0,002 | 0,005 | 1 |
| Il16      | 0,301689 | -0,00291 | 0,002 | 0,005 | 1 |
| Aire      | 0,301689 | -0,00291 | 0,002 | 0,005 | 1 |
| Rdh16     | 0,301689 | -0,00291 | 0,002 | 0,005 | 1 |
| Car5a     | 0,301689 | -0,00291 | 0,002 | 0,005 | 1 |
| Gm20735   | 0,301689 | -0,00291 | 0,002 | 0,005 | 1 |
| Thtpa     | 0,301689 | -0,00291 | 0,002 | 0,005 | 1 |
| Tgm4      | 0,301689 | -0,00291 | 0,002 | 0,005 | 1 |
| Olfr392   | 0,301689 | -0,00291 | 0,002 | 0,005 | 1 |
| Spata20   | 0,301689 | -0,00291 | 0,002 | 0,005 | 1 |
| Gm11739   | 0,301689 | -0,00291 | 0,002 | 0,005 | 1 |
| Hist1h2ad | 0,301689 | -0,00291 | 0,002 | 0,005 | 1 |
| Gm48707   | 0,301689 | -0,00291 | 0,002 | 0,005 | 1 |
| Gm47467   | 0,301689 | -0,00291 | 0,002 | 0,005 | 1 |
| C1qtnf6   | 0,301689 | -0,00291 | 0,002 | 0,005 | 1 |
| Gtse1     | 0,301689 | -0,00291 | 0,002 | 0,005 | 1 |
| D930030IC | 0,301689 | -0,00291 | 0,002 | 0,005 | 1 |
| Olfr204   | 0,301689 | -0,00291 | 0,002 | 0,005 | 1 |
| Igsf5     | 0,301689 | -0,00291 | 0,002 | 0,005 | 1 |
| Gm6594    | 0,301689 | -0,00291 | 0,002 | 0,005 | 1 |
| Camk2a    | 0,301689 | -0,00291 | 0,002 | 0,005 | 1 |
| Lpxn      | 0,301689 | -0,00291 | 0,002 | 0,005 | 1 |
| Gabbr2    | 0,301955 | -0,00354 | 0,002 | 0,005 | 1 |
| Rbakdn    | 0,301955 | -0,00354 | 0,002 | 0,005 | 1 |
| Gm26542   | 0,301955 | -0,00354 | 0,002 | 0,005 | 1 |
| Ms4a7     | 0,301955 | -0,00354 | 0,002 | 0,005 | 1 |

|           |          |          |       |       |   |
|-----------|----------|----------|-------|-------|---|
| Kctd10    | 0,301962 | 0,019509 | 0,094 | 0,08  | 1 |
| Dmrtc1a   | 0,302011 | 0,009983 | 0,033 | 0,024 | 1 |
| Mreg      | 0,302014 | 0,012515 | 0,031 | 0,023 | 1 |
| Acyp2     | 0,302048 | -0,0011  | 0,608 | 0,65  | 1 |
| Ssx2ip    | 0,30217  | 0,019196 | 0,07  | 0,057 | 1 |
| Tm6sf1    | 0,302193 | 0,011236 | 0,033 | 0,024 | 1 |
| Tef       | 0,302212 | 0,037921 | 0,579 | 0,571 | 1 |
| Dctpp1    | 0,302264 | -0,01911 | 0,326 | 0,351 | 1 |
| Hbegf     | 0,302371 | 0,044343 | 0,086 | 0,073 | 1 |
| Vtcn1     | 0,302485 | -0,00193 | 0,002 | 0,005 | 1 |
| Atg4a-ps  | 0,302485 | -0,00193 | 0,002 | 0,005 | 1 |
| Gm11266   | 0,302485 | -0,00193 | 0,002 | 0,005 | 1 |
| Sspnos    | 0,302485 | -0,00193 | 0,002 | 0,005 | 1 |
| Gabrb3    | 0,302485 | -0,00193 | 0,002 | 0,005 | 1 |
| Zic1      | 0,302485 | -0,00193 | 0,002 | 0,005 | 1 |
| 4930500F1 | 0,302485 | -0,00193 | 0,002 | 0,005 | 1 |
| 3110006O  | 0,302485 | -0,00193 | 0,002 | 0,005 | 1 |
| AC150035. | 0,302485 | -0,00193 | 0,002 | 0,005 | 1 |
| March3    | 0,302485 | -0,00193 | 0,002 | 0,005 | 1 |
| Atad3aos  | 0,302538 | -0,01313 | 0,082 | 0,098 | 1 |
| Ptbp3     | 0,302594 | -0,01052 | 0,452 | 0,488 | 1 |
| Kmt2b     | 0,302775 | -0,03189 | 0,313 | 0,333 | 1 |
| Twf1      | 0,302903 | -0,03446 | 0,8   | 0,813 | 1 |
| Hars      | 0,30292  | -0,01026 | 0,527 | 0,564 | 1 |
| Foxp4     | 0,302927 | 0,020803 | 0,105 | 0,089 | 1 |
| Acsbg1    | 0,302933 | -0,00721 | 0,016 | 0,023 | 1 |
| Glyr1     | 0,302979 | -0,01425 | 0,569 | 0,598 | 1 |
| Errfi1    | 0,30318  | -0,04539 | 0,633 | 0,644 | 1 |
| Cdk5rap3  | 0,303192 | -0,02189 | 0,342 | 0,369 | 1 |
| Fam83h    | 0,303281 | -0,00095 | 0,002 | 0,005 | 1 |
| Slc7a4    | 0,303281 | -0,00095 | 0,002 | 0,005 | 1 |
| Prkdc     | 0,303296 | -0,02294 | 0,232 | 0,255 | 1 |
| Gm45051   | 0,303402 | -0,00669 | 0,032 | 0,042 | 1 |
| Klf4      | 0,303417 | 0,222458 | 0,18  | 0,163 | 1 |
| Birc2     | 0,303425 | -0,0087  | 0,388 | 0,429 | 1 |
| Etohd2    | 0,303541 | 0,013653 | 0,048 | 0,037 | 1 |
| Ppp1r35   | 0,30355  | -0,03495 | 0,311 | 0,33  | 1 |
| Fto       | 0,303599 | 0,034756 | 0,651 | 0,629 | 1 |
| Eaf2      | 0,303792 | 0,016342 | 0,027 | 0,02  | 1 |
| Zfp971    | 0,303804 | -0,0118  | 0,041 | 0,052 | 1 |
| Cyb5a     | 0,303838 | -0,00791 | 0,873 | 0,902 | 1 |
| Ipo13     | 0,303897 | -0,01292 | 0,704 | 0,737 | 1 |
| Dcaf12    | 0,30391  | 0,04369  | 0,327 | 0,314 | 1 |
| Uba1      | 0,304064 | 0,036847 | 0,755 | 0,748 | 1 |
| Dpagt1    | 0,304079 | -0,01155 | 0,128 | 0,146 | 1 |
| Dnah7b    | 0,304133 | -0,00671 | 0,008 | 0,013 | 1 |
| Itpripl2  | 0,30428  | 0,019947 | 0,05  | 0,039 | 1 |
| Gm14305   | 0,304414 | -0,01974 | 0,229 | 0,25  | 1 |
| Gm15706   | 0,304501 | 0,01753  | 0,031 | 0,023 | 1 |
| Astn1     | 0,304572 | -0,00562 | 0,016 | 0,023 | 1 |
| Vti1a     | 0,304649 | -0,01962 | 0,31  | 0,335 | 1 |
| A33010211 | 0,304871 | 0,008765 | 0,014 | 0,008 | 1 |

|           |          |          |       |       |   |
|-----------|----------|----------|-------|-------|---|
| Yap1      | 0,305009 | 0,007801 | 0,014 | 0,008 | 1 |
| AU041133  | 0,305063 | -0,00767 | 0,072 | 0,086 | 1 |
| Cops6     | 0,305078 | -0,02102 | 0,725 | 0,774 | 1 |
| Nup210    | 0,305118 | 0,016014 | 0,089 | 0,075 | 1 |
| Clec11a   | 0,305141 | 0,007482 | 0,014 | 0,008 | 1 |
| Gm15743   | 0,305141 | 0,006516 | 0,014 | 0,008 | 1 |
| 1700010I1 | 0,305141 | 0,006516 | 0,014 | 0,008 | 1 |
| Cnm2      | 0,305261 | -0,01271 | 0,132 | 0,151 | 1 |
| 4732419C: | 0,305327 | -0,0051  | 0,008 | 0,013 | 1 |
| Erb2      | 0,305327 | -0,0051  | 0,008 | 0,013 | 1 |
| Zfp773    | 0,305345 | -0,01419 | 0,108 | 0,125 | 1 |
| Paxbp1    | 0,305381 | 0,002845 | 0,371 | 0,411 | 1 |
| Elof1     | 0,305495 | -0,0127  | 0,443 | 0,476 | 1 |
| Frrs1     | 0,305631 | -0,00539 | 0,008 | 0,013 | 1 |
| AC161165. | 0,305695 | 0,006837 | 0,014 | 0,008 | 1 |
| Csnk1g2   | 0,305817 | 0,03649  | 0,412 | 0,393 | 1 |
| Txk       | 0,305827 | 0,005548 | 0,014 | 0,008 | 1 |
| 5033430I1 | 0,305827 | 0,005548 | 0,014 | 0,008 | 1 |
| Zbtb14    | 0,305856 | -0,02393 | 0,125 | 0,141 | 1 |
| Vim       | 0,305898 | 0,037948 | 0,092 | 0,078 | 1 |
| Abr       | 0,306111 | -0,00466 | 0,016 | 0,023 | 1 |
| Cyth3     | 0,306161 | -0,03696 | 0,222 | 0,241 | 1 |
| 1700028K  | 0,306245 | 0,006837 | 0,014 | 0,008 | 1 |
| Gm26836   | 0,306383 | 0,005871 | 0,014 | 0,008 | 1 |
| Ap5b1     | 0,306383 | 0,005871 | 0,014 | 0,008 | 1 |
| Zkscan4   | 0,306489 | 0,006186 | 0,035 | 0,026 | 1 |
| Gm10076   | 0,306556 | -0,01466 | 0,167 | 0,187 | 1 |
| Nsun4     | 0,306649 | -0,01223 | 0,079 | 0,094 | 1 |
| Fam46c    | 0,30668  | -0,00088 | 0,008 | 0,013 | 1 |
| Pygm      | 0,30668  | -0,00379 | 0,008 | 0,013 | 1 |
| Blzf1     | 0,307008 | -0,01186 | 0,236 | 0,26  | 1 |
| Ccdc169   | 0,307016 | -0,0108  | 0,012 | 0,018 | 1 |
| Kti12     | 0,307031 | -0,01216 | 0,102 | 0,119 | 1 |
| Mcts1     | 0,307293 | 0,021138 | 0,391 | 0,359 | 1 |
| Ift27     | 0,307316 | -0,00973 | 0,365 | 0,403 | 1 |
| Cul7      | 0,307506 | 0,012714 | 0,136 | 0,119 | 1 |
| Farp1     | 0,307612 | -0,02469 | 0,086 | 0,101 | 1 |
| Rrm1      | 0,307684 | 0,038461 | 0,277 | 0,259 | 1 |
| Fam206a   | 0,307953 | -0,01554 | 0,168 | 0,189 | 1 |
| Usp35     | 0,308155 | -0,00375 | 0,121 | 0,14  | 1 |
| Gm43672   | 0,30822  | 0,016195 | 0,044 | 0,034 | 1 |
| Tdo2      | 0,30822  | 0,016195 | 0,044 | 0,034 | 1 |
| Arl6ip4   | 0,308359 | -0,01907 | 0,44  | 0,472 | 1 |
| Abca8b    | 0,308458 | 0,009886 | 0,282 | 0,254 | 1 |
| Bcl7a     | 0,308485 | -0,00379 | 0,598 | 0,636 | 1 |
| Ifrd2     | 0,308534 | 0,022012 | 0,108 | 0,093 | 1 |
| Morn1     | 0,308634 | -0,00912 | 0,038 | 0,049 | 1 |
| Pald1     | 0,30865  | 0,018397 | 0,151 | 0,133 | 1 |
| Vps51     | 0,308749 | 0,014921 | 0,114 | 0,098 | 1 |
| Hsd3b2    | 0,3088   | 0,008077 | 0,031 | 0,023 | 1 |
| Il18bp    | 0,308837 | -0,01205 | 0,026 | 0,034 | 1 |
| Map3k10   | 0,308866 | -0,02072 | 0,21  | 0,231 | 1 |

|          |          |          |       |       |   |
|----------|----------|----------|-------|-------|---|
| Lgals2   | 0,308924 | 0,016985 | 0,102 | 0,086 | 1 |
| Hnrnpf   | 0,309001 | 0,035642 | 0,943 | 0,935 | 1 |
| Fkbp7    | 0,309005 | -0,01171 | 0,044 | 0,055 | 1 |
| Grik1    | 0,309089 | 0,029047 | 0,24  | 0,216 | 1 |
| Phldb2   | 0,309293 | -0,00037 | 0,032 | 0,042 | 1 |
| Zfp719   | 0,309432 | -0,0165  | 0,079 | 0,093 | 1 |
| Fam162a  | 0,309592 | -0,01266 | 0,356 | 0,392 | 1 |
| Sestd1   | 0,309611 | -0,02572 | 0,121 | 0,137 | 1 |
| Clec2l   | 0,30979  | -0,00727 | 0,012 | 0,018 | 1 |
| Slc17a9  | 0,309958 | 0,01224  | 0,026 | 0,018 | 1 |
| Afdn     | 0,310072 | 0,020274 | 0,682 | 0,662 | 1 |
| Gpaa1    | 0,310142 | -0,01241 | 0,302 | 0,328 | 1 |
| Jam2     | 0,310174 | 0,020098 | 0,075 | 0,062 | 1 |
| Slc6a7   | 0,310402 | 0,010002 | 0,014 | 0,008 | 1 |
| 4930579G | 0,310638 | 0,011635 | 0,123 | 0,106 | 1 |
| Ppp1r3e  | 0,310832 | -0,01367 | 0,163 | 0,184 | 1 |
| Usp53    | 0,310926 | -0,00665 | 0,247 | 0,272 | 1 |
| Arl4c    | 0,310942 | 0,009851 | 0,05  | 0,039 | 1 |
| Gm16740  | 0,310946 | -0,01171 | 0,047 | 0,059 | 1 |
| Gtf2h1   | 0,311066 | -0,02043 | 0,287 | 0,312 | 1 |
| Polr1b   | 0,311097 | 0,017567 | 0,085 | 0,072 | 1 |
| Smyd4    | 0,311109 | -0,01779 | 0,154 | 0,172 | 1 |
| Dnmbp    | 0,311118 | -0,0063  | 0,012 | 0,018 | 1 |
| Atp6v1b2 | 0,311205 | -0,02596 | 0,631 | 0,646 | 1 |
| Armc7    | 0,311206 | 0,017781 | 0,066 | 0,054 | 1 |
| Lrrfp1   | 0,311273 | 0,020055 | 0,027 | 0,02  | 1 |
| BC037039 | 0,311307 | -0,00568 | 0,012 | 0,018 | 1 |
| Clcn4    | 0,311355 | -0,02201 | 0,882 | 0,872 | 1 |
| Mkln1os  | 0,31143  | -0,00505 | 0,012 | 0,018 | 1 |
| Gnb1l    | 0,31143  | -0,00505 | 0,012 | 0,018 | 1 |
| Slc35a1  | 0,311611 | -0,02612 | 0,201 | 0,221 | 1 |
| Wdr46    | 0,31171  | 0,028397 | 0,217 | 0,198 | 1 |
| Usp48    | 0,31179  | -0,05812 | 0,523 | 0,537 | 1 |
| Nbl1     | 0,311853 | 0,007801 | 0,016 | 0,01  | 1 |
| Ndufs4   | 0,311872 | -0,0281  | 0,68  | 0,691 | 1 |
| Mpp1     | 0,312161 | -0,02684 | 0,168 | 0,187 | 1 |
| Ppil3    | 0,312185 | -0,01862 | 0,268 | 0,293 | 1 |
| Acy1     | 0,312315 | -0,01283 | 0,345 | 0,379 | 1 |
| Zfp691   | 0,312389 | -0,00381 | 0,063 | 0,076 | 1 |
| Snrpa1   | 0,312792 | 0,015048 | 0,311 | 0,285 | 1 |
| Entpd7   | 0,313013 | -0,0068  | 0,085 | 0,101 | 1 |
| Gm17382  | 0,313024 | 0,01292  | 0,018 | 0,011 | 1 |
| Rpp21    | 0,313033 | -0,01868 | 0,421 | 0,446 | 1 |
| Tmem184k | 0,31309  | -0,03269 | 0,45  | 0,47  | 1 |
| Coq5     | 0,31311  | 0,02212  | 0,352 | 0,325 | 1 |
| Vwa3b    | 0,313155 | 0,006192 | 0,016 | 0,01  | 1 |
| Chchd10  | 0,313172 | -0,14901 | 0,222 | 0,236 | 1 |
| Otud3    | 0,313383 | 0,008098 | 0,027 | 0,02  | 1 |
| Klhl29   | 0,313383 | 0,008098 | 0,027 | 0,02  | 1 |
| Cklf     | 0,313449 | -0,00175 | 0,121 | 0,14  | 1 |
| Cnpy4    | 0,313562 | -0,01794 | 0,19  | 0,211 | 1 |
| Bpgm     | 0,313598 | -0,02662 | 0,974 | 0,98  | 1 |

|          |          |          |       |       |   |
|----------|----------|----------|-------|-------|---|
| Ccnjl    | 0,313614 | -0,01049 | 0,028 | 0,037 | 1 |
| Dnase2a  | 0,313742 | 0,037404 | 0,096 | 0,083 | 1 |
| Phlda3   | 0,313925 | 0,037764 | 0,912 | 0,932 | 1 |
| Csad     | 0,314107 | -0,02973 | 0,24  | 0,26  | 1 |
| Cdc7     | 0,314125 | 0,00857  | 0,082 | 0,068 | 1 |
| Gm3448   | 0,314171 | 0,030175 | 0,124 | 0,107 | 1 |
| Camk4    | 0,314231 | -0,00022 | 0,012 | 0,018 | 1 |
| Polr3c   | 0,314326 | -0,0075  | 0,144 | 0,164 | 1 |
| Stk11ip  | 0,31446  | -0,02241 | 0,111 | 0,127 | 1 |
| Tmcc1    | 0,314464 | -0,01995 | 0,899 | 0,896 | 1 |
| Kif7     | 0,314486 | 0,01224  | 0,024 | 0,016 | 1 |
| Ten1     | 0,314526 | -0,0256  | 0,595 | 0,626 | 1 |
| Samd9l   | 0,31456  | -0,00831 | 0,026 | 0,034 | 1 |
| Tusc2    | 0,314607 | -0,0258  | 0,34  | 0,363 | 1 |
| Crtc3    | 0,314889 | 0,040062 | 0,355 | 0,335 | 1 |
| Al413582 | 0,314911 | -0,02834 | 0,56  | 0,584 | 1 |
| Rbmxl1   | 0,31523  | -0,02349 | 0,386 | 0,408 | 1 |
| Mef2b    | 0,315323 | 0,013534 | 0,022 | 0,015 | 1 |
| Tmem255a | 0,315512 | -0,00278 | 0,012 | 0,018 | 1 |
| Gins1    | 0,315538 | -0,00613 | 0,026 | 0,034 | 1 |
| Gm28529  | 0,315589 | 0,008119 | 0,018 | 0,011 | 1 |
| Spry3    | 0,315589 | 0,007156 | 0,018 | 0,011 | 1 |
| Rpe      | 0,31577  | -0,01855 | 0,368 | 0,392 | 1 |
| Gcdh     | 0,315906 | -0,03511 | 0,231 | 0,25  | 1 |
| Adgrg2   | 0,315941 | -0,00688 | 0,05  | 0,062 | 1 |
| Eipr1    | 0,315988 | -0,02261 | 0,242 | 0,263 | 1 |
| Pkd2l2   | 0,316085 | 0,007475 | 0,018 | 0,011 | 1 |
| Gm47101  | 0,316089 | 0,010667 | 0,018 | 0,011 | 1 |
| Gatc     | 0,316326 | -0,01607 | 0,196 | 0,216 | 1 |
| Brms1l   | 0,316349 | 0,035703 | 0,324 | 0,306 | 1 |
| ldh3b    | 0,316417 | 0,047027 | 0,506 | 0,498 | 1 |
| Cdk4     | 0,316455 | 0,023581 | 0,495 | 0,468 | 1 |
| Lasp1    | 0,316458 | -0,01265 | 0,028 | 0,037 | 1 |
| Jpx      | 0,316459 | -0,0084  | 0,153 | 0,174 | 1 |
| Ddost    | 0,31657  | 0,037694 | 0,742 | 0,74  | 1 |
| 4921504A | 0,316573 | -0,00621 | 0,149 | 0,169 | 1 |
| Lrp8     | 0,31683  | 0,009691 | 0,018 | 0,011 | 1 |
| Nploc4   | 0,316838 | -0,01332 | 0,293 | 0,322 | 1 |
| Tmem94   | 0,31685  | -0,01902 | 0,128 | 0,145 | 1 |
| Zbtb11   | 0,316861 | 0,053451 | 0,459 | 0,449 | 1 |
| Adsl     | 0,316875 | -0,01703 | 0,229 | 0,25  | 1 |
| Tbk1     | 0,31692  | -0,02193 | 0,258 | 0,281 | 1 |
| Gm26670  | 0,317309 | 0,007792 | 0,022 | 0,015 | 1 |
| Dnajb5   | 0,317317 | -0,01183 | 0,09  | 0,106 | 1 |
| Etv6     | 0,317401 | -0,01323 | 0,059 | 0,072 | 1 |
| Tspan32  | 0,317438 | -0,00423 | 0,026 | 0,034 | 1 |
| Tuba1a   | 0,317468 | 0,041461 | 0,999 | 1     | 1 |
| Gm16133  | 0,317556 | 0,009051 | 0,024 | 0,016 | 1 |
| Psm5     | 0,317661 | -0,00975 | 0,249 | 0,275 | 1 |
| Smg1     | 0,317672 | -0,01838 | 0,434 | 0,455 | 1 |
| Gm20517  | 0,317759 | 0,008108 | 0,022 | 0,015 | 1 |
| Mid1     | 0,317805 | 0,00555  | 0,018 | 0,011 | 1 |



|           |          |          |       |       |   |
|-----------|----------|----------|-------|-------|---|
| Rpl23a    | 0,317901 | -0,02887 | 0,959 | 0,946 | 1 |
| Herc4     | 0,317942 | -0,02083 | 0,391 | 0,42  | 1 |
| Glt1d1    | 0,317947 | 0,011819 | 0,044 | 0,034 | 1 |
| Dlat      | 0,318024 | -0,01094 | 0,264 | 0,291 | 1 |
| Drosha    | 0,318348 | -0,01829 | 0,289 | 0,315 | 1 |
| Rmnd5a    | 0,318446 | 0,066832 | 0,494 | 0,499 | 1 |
| Rab12     | 0,318483 | 0,037146 | 0,397 | 0,376 | 1 |
| Phc2      | 0,31865  | 0,025969 | 0,842 | 0,833 | 1 |
| Mrps22    | 0,318669 | -0,01876 | 0,222 | 0,244 | 1 |
| Nod1      | 0,318932 | -0,02106 | 0,224 | 0,246 | 1 |
| Polr3k    | 0,318981 | -0,01518 | 0,3   | 0,327 | 1 |
| Zfp629    | 0,319006 | -0,00952 | 0,096 | 0,112 | 1 |
| Plcx2     | 0,319092 | 0,00715  | 0,02  | 0,013 | 1 |
| Rab6b     | 0,31914  | 0,059588 | 0,643 | 0,624 | 1 |
| Cox8a     | 0,319168 | 0,032205 | 0,992 | 0,995 | 1 |
| Eif4ebp2  | 0,319309 | -0,02811 | 0,234 | 0,252 | 1 |
| Figl1     | 0,319553 | 0,005871 | 0,02  | 0,013 | 1 |
| Exoc8     | 0,31959  | -0,00999 | 0,161 | 0,182 | 1 |
| Lctl      | 0,320089 | -0,0117  | 0,031 | 0,041 | 1 |
| Ets2      | 0,320148 | 0,007467 | 0,02  | 0,013 | 1 |
| Ttc27     | 0,320226 | -0,01745 | 0,1   | 0,115 | 1 |
| Psmg4     | 0,320236 | -0,03457 | 0,367 | 0,389 | 1 |
| Nhej1     | 0,320249 | 0,010511 | 0,057 | 0,046 | 1 |
| Man2b2    | 0,320553 | -0,01482 | 0,126 | 0,143 | 1 |
| Myo5a     | 0,320725 | 0,00771  | 0,284 | 0,317 | 1 |
| Aldh9a1   | 0,320749 | -0,00911 | 0,427 | 0,457 | 1 |
| Ctsf      | 0,320889 | -0,02648 | 0,478 | 0,504 | 1 |
| Acsl3     | 0,320967 | -0,00682 | 0,75  | 0,789 | 1 |
| Fbxo28    | 0,321083 | 0,030739 | 0,549 | 0,528 | 1 |
| Pter      | 0,32114  | -0,01462 | 0,197 | 0,22  | 1 |
| Nfkbil1   | 0,321176 | -0,00846 | 0,177 | 0,198 | 1 |
| Pcmt1     | 0,321262 | -0,01376 | 0,815 | 0,844 | 1 |
| Smc6      | 0,321319 | -0,02548 | 0,647 | 0,675 | 1 |
| Tmem60    | 0,321323 | -0,02885 | 0,539 | 0,556 | 1 |
| 1700037C: | 0,321499 | 0,017665 | 0,151 | 0,133 | 1 |
| Erc1      | 0,321829 | -0,01211 | 0,165 | 0,185 | 1 |
| Arel1     | 0,322171 | -0,03256 | 0,302 | 0,32  | 1 |
| Prkce     | 0,322225 | 0,021842 | 0,053 | 0,042 | 1 |
| Ttc1      | 0,322319 | -0,02104 | 0,553 | 0,597 | 1 |
| Smad4     | 0,322569 | 0,036534 | 0,456 | 0,439 | 1 |
| Zfp933    | 0,322572 | -0,00803 | 0,127 | 0,145 | 1 |
| Prelid1   | 0,322588 | 0,018564 | 0,527 | 0,501 | 1 |
| Gm16124   | 0,322669 | -0,00696 | 0,031 | 0,041 | 1 |
| Acaca     | 0,322898 | -0,01565 | 0,812 | 0,82  | 1 |
| Stk35     | 0,32298  | -0,01527 | 0,128 | 0,145 | 1 |
| Lims2     | 0,323062 | -0,02572 | 0,255 | 0,276 | 1 |
| Plpp1     | 0,323193 | -0,01209 | 0,134 | 0,153 | 1 |
| Matr3     | 0,323257 | 0,041608 | 0,951 | 0,961 | 1 |
| Sirpa     | 0,323306 | 0,025153 | 0,1   | 0,086 | 1 |
| 9430060I0 | 0,323358 | -0,00079 | 0,026 | 0,018 | 1 |
| Tbc1d17   | 0,323597 | -0,03385 | 0,584 | 0,6   | 1 |
| Psm2      | 0,323618 | 0,026388 | 0,79  | 0,779 | 1 |

|           |          |          |       |       |   |
|-----------|----------|----------|-------|-------|---|
| Saxo2     | 0,323856 | -0,02241 | 0,102 | 0,117 | 1 |
| Rmnd5b    | 0,323879 | -0,01133 | 0,203 | 0,224 | 1 |
| Pim3      | 0,323912 | 0,067995 | 0,824 | 0,826 | 1 |
| Ddx19a    | 0,324224 | 0,030144 | 0,276 | 0,257 | 1 |
| Gm7598    | 0,324446 | -0,0112  | 0,034 | 0,044 | 1 |
| Bola3     | 0,324485 | -0,00843 | 0,358 | 0,387 | 1 |
| Pkn2      | 0,324646 | -0,01752 | 0,635 | 0,66  | 1 |
| Scamp3    | 0,324654 | -0,02895 | 0,523 | 0,538 | 1 |
| Lage3     | 0,324701 | -0,0313  | 0,416 | 0,436 | 1 |
| Zdhhc5    | 0,32472  | -0,01985 | 0,175 | 0,193 | 1 |
| Vps26b    | 0,324779 | -0,03142 | 0,275 | 0,294 | 1 |
| H2-Q7     | 0,325103 | -0,0327  | 0,022 | 0,029 | 1 |
| Vhl       | 0,325166 | 0,019671 | 0,279 | 0,255 | 1 |
| Psme3     | 0,325211 | -0,01275 | 0,249 | 0,276 | 1 |
| Higd1a    | 0,325268 | -0,01278 | 0,679 | 0,714 | 1 |
| Mrpl38    | 0,325347 | 0,054179 | 0,359 | 0,346 | 1 |
| Al464131  | 0,32548  | -0,01393 | 0,043 | 0,054 | 1 |
| Fam107b   | 0,325525 | -0,01013 | 0,2   | 0,223 | 1 |
| Arhgap39  | 0,325541 | -0,01392 | 0,436 | 0,467 | 1 |
| Tstd3     | 0,325612 | 0,012566 | 0,075 | 0,062 | 1 |
| Otub2     | 0,325636 | -0,02185 | 0,066 | 0,078 | 1 |
| Cep295    | 0,325867 | -0,02134 | 0,295 | 0,322 | 1 |
| Bcl2l1    | 0,326112 | -0,00712 | 0,749 | 0,797 | 1 |
| Tubb2a    | 0,326119 | -0,00662 | 0,223 | 0,25  | 1 |
| Jrkl      | 0,32622  | 0,032767 | 0,238 | 0,22  | 1 |
| Prdx5     | 0,326228 | 0,041398 | 0,704 | 0,717 | 1 |
| 27000970  | 0,326297 | -0,0199  | 0,27  | 0,293 | 1 |
| Pepd      | 0,326347 | 0,034706 | 0,548 | 0,527 | 1 |
| Adck1     | 0,326365 | -0,01182 | 0,197 | 0,22  | 1 |
| Mien1     | 0,32644  | 0,016185 | 0,838 | 0,854 | 1 |
| Gm26879   | 0,326619 | 0,01339  | 0,04  | 0,031 | 1 |
| Alg6      | 0,326698 | -0,02777 | 0,192 | 0,211 | 1 |
| Klk6      | 0,326809 | -0,11225 | 0,866 | 0,789 | 1 |
| Zfp963    | 0,32686  | -0,00602 | 0,031 | 0,041 | 1 |
| Zfp266    | 0,327065 | -0,02781 | 0,577 | 0,598 | 1 |
| Trp53inp2 | 0,327145 | 0,004509 | 0,294 | 0,327 | 1 |
| Actr3b    | 0,327174 | -0,01342 | 0,037 | 0,047 | 1 |
| Mcm7      | 0,327192 | 0,025065 | 0,235 | 0,215 | 1 |
| Togaram1  | 0,327204 | -0,01477 | 0,175 | 0,195 | 1 |
| Col11a2   | 0,327237 | 0,04178  | 0,243 | 0,223 | 1 |
| Golga1    | 0,327237 | 0,046106 | 0,329 | 0,314 | 1 |
| Mettl5os  | 0,327344 | -0,01327 | 0,015 | 0,021 | 1 |
| A930003A  | 0,327586 | 0,010573 | 0,094 | 0,08  | 1 |
| Eif1ad    | 0,327611 | -0,01179 | 0,241 | 0,265 | 1 |
| Gm3435    | 0,327612 | -0,01358 | 0,046 | 0,057 | 1 |
| Tex30     | 0,327717 | 0,015516 | 0,108 | 0,093 | 1 |
| Diablo    | 0,327803 | -0,02117 | 0,637 | 0,665 | 1 |
| Tesk2     | 0,327861 | 0,027926 | 0,326 | 0,302 | 1 |
| Wdr1      | 0,328027 | -0,00244 | 0,549 | 0,582 | 1 |
| Ankrd12   | 0,328058 | 0,035846 | 0,875 | 0,86  | 1 |
| Zbtb20    | 0,328121 | 0,043383 | 0,991 | 0,993 | 1 |
| Fam172a   | 0,328143 | -0,02586 | 0,605 | 0,6   | 1 |

|           |          |          |       |       |   |
|-----------|----------|----------|-------|-------|---|
| Ccng2     | 0,32829  | 0,002925 | 0,247 | 0,275 | 1 |
| Gak       | 0,328419 | -0,00204 | 0,296 | 0,327 | 1 |
| Ice2      | 0,328436 | -0,00367 | 0,2   | 0,224 | 1 |
| Rnaseh2a  | 0,328638 | -0,01312 | 0,205 | 0,228 | 1 |
| Lypla2    | 0,328668 | -0,0027  | 0,236 | 0,26  | 1 |
| Tmem177   | 0,329032 | -0,01214 | 0,04  | 0,05  | 1 |
| Casc1     | 0,329271 | -0,01091 | 0,022 | 0,029 | 1 |
| Tars      | 0,329292 | -0,02841 | 0,242 | 0,26  | 1 |
| Hps3      | 0,3293   | -0,01614 | 0,2   | 0,221 | 1 |
| Rgs7      | 0,329482 | -0,00948 | 0,015 | 0,021 | 1 |
| Pask      | 0,329482 | -0,01107 | 0,015 | 0,021 | 1 |
| Gm16287   | 0,329637 | 0,010271 | 0,04  | 0,031 | 1 |
| 1700021FC | 0,329666 | 0,006953 | 0,182 | 0,161 | 1 |
| Fa2h      | 0,329895 | 0,015811 | 0,996 | 0,997 | 1 |
| Hdac8     | 0,329899 | -0,01861 | 0,156 | 0,174 | 1 |
| U2af2     | 0,329947 | 0,020285 | 0,611 | 0,577 | 1 |
| Emilin2   | 0,329957 | 0,036121 | 0,473 | 0,454 | 1 |
| Ebna1bp2  | 0,330014 | 0,037279 | 0,489 | 0,48  | 1 |
| Nubpl     | 0,330143 | -0,01764 | 0,078 | 0,091 | 1 |
| Gzf1      | 0,330146 | -0,01611 | 0,198 | 0,22  | 1 |
| Rchy1     | 0,330154 | 0,024724 | 0,622 | 0,589 | 1 |
| Ate1      | 0,330161 | 0,024723 | 0,581 | 0,554 | 1 |
| Pold2     | 0,330276 | -0,00793 | 0,258 | 0,285 | 1 |
| Pcdh11x   | 0,33029  | -0,02998 | 0,156 | 0,172 | 1 |
| Srf       | 0,330292 | 0,030762 | 0,187 | 0,171 | 1 |
| Cr1l      | 0,330477 | -0,02176 | 0,395 | 0,423 | 1 |
| Ndn       | 0,330551 | -0,02274 | 0,24  | 0,262 | 1 |
| Zbtb25    | 0,330621 | 0,027914 | 0,119 | 0,104 | 1 |
| Cdk10     | 0,330745 | -0,01651 | 0,179 | 0,198 | 1 |
| Mphosph6  | 0,330856 | 0,015231 | 0,422 | 0,397 | 1 |
| Akip1     | 0,330898 | 0,017753 | 0,118 | 0,102 | 1 |
| Whamm     | 0,330939 | 0,020888 | 0,156 | 0,14  | 1 |
| Bicra     | 0,331106 | -0,01762 | 0,179 | 0,198 | 1 |
| Dyrk1a    | 0,331138 | 0,032815 | 0,417 | 0,402 | 1 |
| Rab24     | 0,331199 | -0,01736 | 0,41  | 0,442 | 1 |
| Ints5.1   | 0,331259 | 0,013489 | 0,108 | 0,093 | 1 |
| Sae1      | 0,331394 | -0,00745 | 0,261 | 0,288 | 1 |
| Gtpbp10   | 0,331425 | -0,01113 | 0,112 | 0,128 | 1 |
| 6330403LC | 0,331693 | -0,0139  | 0,106 | 0,122 | 1 |
| Ints14    | 0,331716 | 0,026091 | 0,151 | 0,135 | 1 |
| Stt3b     | 0,331871 | -0,00957 | 0,388 | 0,421 | 1 |
| Ank3      | 0,331909 | -0,01976 | 0,987 | 0,995 | 1 |
| Tmem121   | 0,331945 | -0,01327 | 0,204 | 0,226 | 1 |
| Pcid2     | 0,331965 | 0,030626 | 0,261 | 0,242 | 1 |
| Sept3     | 0,331981 | -0,00681 | 0,022 | 0,029 | 1 |
| Larp4b    | 0,332022 | 0,049829 | 0,567 | 0,553 | 1 |
| Tmem91    | 0,332094 | -0,01205 | 0,022 | 0,029 | 1 |
| Arhgap19  | 0,332278 | -0,00523 | 0,022 | 0,029 | 1 |
| 2810455OI | 0,332573 | -0,00653 | 0,022 | 0,029 | 1 |
| Adgrb1    | 0,332776 | 0,023146 | 0,22  | 0,2   | 1 |
| Dlg3      | 0,332891 | -0,0058  | 0,07  | 0,083 | 1 |
| Fis1      | 0,332894 | -0,01665 | 0,986 | 0,998 | 1 |

|          |          |          |       |       |   |
|----------|----------|----------|-------|-------|---|
| Cadm3    | 0,332921 | -0,01924 | 0,142 | 0,159 | 1 |
| Cd55     | 0,332956 | -0,0143  | 0,025 | 0,033 | 1 |
| Piezo2   | 0,333002 | -0,02839 | 0,2   | 0,218 | 1 |
| Gm14419  | 0,333028 | -0,00905 | 0,04  | 0,05  | 1 |
| Lrch2    | 0,333069 | -0,00056 | 0,223 | 0,249 | 1 |
| Gemin7   | 0,333224 | 0,030825 | 0,423 | 0,407 | 1 |
| Ctps     | 0,333398 | -0,00967 | 0,154 | 0,172 | 1 |
| Grik3    | 0,333502 | -0,00484 | 0,022 | 0,029 | 1 |
| Cyp4f16  | 0,333569 | -0,0166  | 0,146 | 0,164 | 1 |
| Fitm2    | 0,333777 | -0,00965 | 0,19  | 0,211 | 1 |
| Mphosph1 | 0,333802 | -0,03004 | 0,397 | 0,421 | 1 |
| Etfhd    | 0,333804 | 0,030131 | 0,261 | 0,242 | 1 |
| Slc30a5  | 0,333825 | 0,009628 | 0,299 | 0,281 | 1 |
| Sgsm2    | 0,333829 | -0,00561 | 0,106 | 0,122 | 1 |
| Ercc3    | 0,333888 | 0,022049 | 0,208 | 0,189 | 1 |
| Tatdn3   | 0,333894 | -0,00912 | 0,148 | 0,167 | 1 |
| Ubtf     | 0,333977 | 0,036176 | 0,632 | 0,607 | 1 |
| Ywhae    | 0,334014 | 0,012873 | 0,999 | 1     | 1 |
| Ap3m2    | 0,334057 | -0,0217  | 0,206 | 0,226 | 1 |
| Pkn1     | 0,334206 | -0,01754 | 0,362 | 0,387 | 1 |
| Tra2b    | 0,334208 | 0,083224 | 0,825 | 0,857 | 1 |
| Cstad    | 0,334523 | -0,00211 | 0,015 | 0,021 | 1 |
| Sec61b   | 0,334617 | -0,02219 | 0,597 | 0,624 | 1 |
| Gm27017  | 0,33464  | -0,00534 | 0,015 | 0,021 | 1 |
| Esyt2    | 0,334654 | -0,01695 | 0,334 | 0,366 | 1 |
| Ajap1    | 0,334765 | -0,00602 | 0,044 | 0,034 | 1 |
| Pdcd6    | 0,334781 | -0,01114 | 0,681 | 0,712 | 1 |
| Snx32    | 0,335    | 0,03581  | 0,6   | 0,572 | 1 |
| Hectd4   | 0,335135 | -0,00871 | 0,33  | 0,356 | 1 |
| Acer3    | 0,335151 | -0,01302 | 0,117 | 0,133 | 1 |
| Mylip    | 0,335165 | -0,01879 | 0,094 | 0,109 | 1 |
| Tbc1d4   | 0,335222 | -0,01574 | 0,078 | 0,091 | 1 |
| Gm7173   | 0,335559 | -0,00768 | 0,007 | 0,011 | 1 |
| Rassf7   | 0,335559 | -0,00768 | 0,007 | 0,011 | 1 |
| Eci2     | 0,335666 | 0,026804 | 0,4   | 0,385 | 1 |
| Gm48508  | 0,33573  | -0,01934 | 0,142 | 0,159 | 1 |
| Sec61g   | 0,335873 | -0,04146 | 0,892 | 0,901 | 1 |
| Ak3      | 0,335894 | -0,01759 | 0,901 | 0,894 | 1 |
| Arfip2   | 0,336146 | -0,01699 | 0,421 | 0,447 | 1 |
| Acad10   | 0,336224 | -0,00461 | 0,022 | 0,029 | 1 |
| Slc36a1  | 0,336283 | 0,016583 | 0,06  | 0,049 | 1 |
| D11Wsu47 | 0,336294 | -0,01922 | 0,079 | 0,093 | 1 |
| Rab3il1  | 0,336517 | 0,018237 | 0,079 | 0,067 | 1 |
| Fibp     | 0,33658  | -0,00481 | 0,306 | 0,337 | 1 |
| Sart3    | 0,336615 | -0,01906 | 0,228 | 0,247 | 1 |
| Tug1     | 0,336652 | 0,032438 | 0,529 | 0,509 | 1 |
| Zgpat    | 0,336683 | 0,023889 | 0,184 | 0,166 | 1 |
| Ndufs5   | 0,336702 | 0,031522 | 0,973 | 0,969 | 1 |
| Ncan     | 0,33675  | -0,00608 | 0,007 | 0,011 | 1 |
| Sbds     | 0,336824 | -0,02955 | 0,921 | 0,924 | 1 |
| Cnksr2   | 0,336884 | -0,0136  | 0,025 | 0,033 | 1 |
| Higd2a   | 0,336895 | -0,02244 | 0,789 | 0,807 | 1 |

|          |          |          |       |       |   |
|----------|----------|----------|-------|-------|---|
| Uchl3    | 0,336981 | -0,0135  | 0,502 | 0,543 | 1 |
| Smim7    | 0,337057 | -0,02319 | 0,767 | 0,789 | 1 |
| Prss12   | 0,337124 | 0,011366 | 0,007 | 0,003 | 1 |
| Phyh     | 0,337257 | -0,02965 | 0,464 | 0,485 | 1 |
| Bbof1    | 0,337271 | -0,01799 | 0,085 | 0,099 | 1 |
| Acadvl   | 0,337428 | 0,053828 | 0,495 | 0,491 | 1 |
| Brd9     | 0,337542 | 0,035691 | 0,71  | 0,696 | 1 |
| Fbln1    | 0,337549 | 0,006519 | 0,007 | 0,003 | 1 |
| Dclre1c  | 0,337577 | 0,022768 | 0,086 | 0,073 | 1 |
| Rnf216   | 0,337582 | -0,00784 | 0,482 | 0,514 | 1 |
| Sccpdh   | 0,337765 | 0,029796 | 0,944 | 0,93  | 1 |
| Dok7     | 0,337783 | 0,014007 | 0,135 | 0,119 | 1 |
| Ndufaf5  | 0,337804 | -0,02231 | 0,141 | 0,158 | 1 |
| Rhof     | 0,337943 | -0,00447 | 0,007 | 0,011 | 1 |
| Mtag2    | 0,337943 | -0,00447 | 0,007 | 0,011 | 1 |
| Gm48653  | 0,337943 | -0,00447 | 0,007 | 0,011 | 1 |
| Ubn1     | 0,337944 | 0,028104 | 0,618 | 0,593 | 1 |
| Gm960    | 0,337974 | 0,005547 | 0,007 | 0,003 | 1 |
| Tmc1     | 0,337974 | 0,005547 | 0,007 | 0,003 | 1 |
| Evi2     | 0,338027 | -0,00961 | 0,025 | 0,033 | 1 |
| Scaf4    | 0,338037 | 0,027055 | 0,217 | 0,198 | 1 |
| D930048G | 0,338059 | 0,017209 | 0,06  | 0,049 | 1 |
| Gdpd3    | 0,33818  | -0,00409 | 0,037 | 0,047 | 1 |
| Fen1     | 0,338192 | 0,011897 | 0,181 | 0,202 | 1 |
| Exd1     | 0,338399 | 0,006519 | 0,007 | 0,003 | 1 |
| 2310030G | 0,338399 | 0,006519 | 0,007 | 0,003 | 1 |
| Sync     | 0,338399 | 0,004573 | 0,007 | 0,003 | 1 |
| Dsccl1   | 0,338399 | 0,004573 | 0,007 | 0,003 | 1 |
| Snx22    | 0,338429 | -0,01256 | 0,088 | 0,102 | 1 |
| Msto1    | 0,338438 | -0,01053 | 0,128 | 0,145 | 1 |
| Cacna1b  | 0,338461 | -0,00248 | 0,007 | 0,011 | 1 |
| Skida1   | 0,338502 | -0,009   | 0,025 | 0,033 | 1 |
| Klhl15   | 0,338529 | 0,021078 | 0,22  | 0,2   | 1 |
| Dhx36    | 0,338545 | -0,00956 | 0,774 | 0,793 | 1 |
| Grik4    | 0,338606 | -0,01966 | 0,141 | 0,158 | 1 |
| 31100790 | 0,338825 | 0,003599 | 0,007 | 0,003 | 1 |
| Chrn2    | 0,338825 | 0,003599 | 0,007 | 0,003 | 1 |
| Gm29561  | 0,338825 | 0,003599 | 0,007 | 0,003 | 1 |
| 1700057H | 0,338825 | 0,003599 | 0,007 | 0,003 | 1 |
| Aldh1a3  | 0,338825 | 0,003599 | 0,007 | 0,003 | 1 |
| Scml4    | 0,338825 | 0,003599 | 0,007 | 0,003 | 1 |
| Triml2   | 0,338825 | 0,003599 | 0,007 | 0,003 | 1 |
| Gm9725   | 0,338825 | 0,003599 | 0,007 | 0,003 | 1 |
| Opn4     | 0,338825 | 0,003599 | 0,007 | 0,003 | 1 |
| Gm17399  | 0,338825 | 0,003599 | 0,007 | 0,003 | 1 |
| Mgat5b   | 0,338825 | 0,003599 | 0,007 | 0,003 | 1 |
| Olfr107  | 0,338825 | 0,003599 | 0,007 | 0,003 | 1 |
| Gm16068  | 0,338825 | 0,003599 | 0,007 | 0,003 | 1 |
| Emx2os   | 0,338825 | 0,003599 | 0,007 | 0,003 | 1 |
| Rabepk   | 0,338902 | -0,01331 | 0,152 | 0,171 | 1 |
| Eif4a2   | 0,338934 | 0,03738  | 0,932 | 0,94  | 1 |
| Smg9     | 0,338958 | -0,02549 | 0,284 | 0,306 | 1 |

|            |          |          |       |       |   |
|------------|----------|----------|-------|-------|---|
| 4930513N   | 0,33904  | 0,0049   | 0,007 | 0,003 | 1 |
| Gm46440    | 0,339051 | -0,00921 | 0,011 | 0,016 | 1 |
| Gm15614    | 0,339142 | -0,0035  | 0,007 | 0,011 | 1 |
| Far2       | 0,339142 | -0,0035  | 0,007 | 0,011 | 1 |
| Celf4      | 0,339188 | -0,01018 | 0,011 | 0,016 | 1 |
| Cdkn2aipnl | 0,339203 | -0,04004 | 0,249 | 0,267 | 1 |
| Cdnf       | 0,339474 | -0,01204 | 0,011 | 0,016 | 1 |
| Nr1h3      | 0,339487 | -0,00219 | 0,007 | 0,011 | 1 |
| Ppfbp1     | 0,339591 | 0,004667 | 0,068 | 0,055 | 1 |
| Gm43666    | 0,33968  | 0,003283 | 0,007 | 0,003 | 1 |
| Reps2      | 0,339685 | -0,00647 | 0,341 | 0,366 | 1 |
| Cacfd1     | 0,339753 | -0,02516 | 0,282 | 0,301 | 1 |
| Tmem192    | 0,339803 | -0,01646 | 0,397 | 0,426 | 1 |
| Sfxn1      | 0,339862 | -0,00927 | 0,025 | 0,033 | 1 |
| Gsta3      | 0,339877 | -0,00951 | 0,046 | 0,057 | 1 |
| A230060F1  | 0,339893 | 0,002954 | 0,007 | 0,003 | 1 |
| Sphk1      | 0,339893 | 0,002954 | 0,007 | 0,003 | 1 |
| Pcdhb8     | 0,340107 | -0,00028 | 0,007 | 0,003 | 1 |
| Dclre1b    | 0,340198 | -0,01999 | 0,116 | 0,132 | 1 |
| Tmc8       | 0,34032  | 0,00198  | 0,007 | 0,003 | 1 |
| Hddc3      | 0,340405 | -0,02619 | 0,188 | 0,205 | 1 |
| Zfp768     | 0,340436 | 0,022623 | 0,191 | 0,174 | 1 |
| Usf1       | 0,340688 | -0,01218 | 0,368 | 0,397 | 1 |
| Rhot1      | 0,340715 | -0,02855 | 0,396 | 0,416 | 1 |
| Plcg1      | 0,340755 | -0,01443 | 0,229 | 0,252 | 1 |
| Cwc15      | 0,341005 | -0,02201 | 0,905 | 0,917 | 1 |
| Wdr24      | 0,341114 | -0,01207 | 0,075 | 0,088 | 1 |
| Prpf18     | 0,341166 | -0,02396 | 0,328 | 0,351 | 1 |
| Phf12      | 0,341289 | 0,020489 | 0,373 | 0,353 | 1 |
| 2900076A   | 0,341329 | -0,02108 | 0,168 | 0,185 | 1 |
| Gm1979     | 0,341548 | -0,00219 | 0,007 | 0,011 | 1 |
| Sdf2       | 0,341671 | 0,025673 | 0,559 | 0,541 | 1 |
| 4732440D   | 0,341737 | -0,03022 | 0,108 | 0,122 | 1 |
| Tcp11l1    | 0,34177  | -0,00302 | 0,275 | 0,302 | 1 |
| Haus2      | 0,34207  | -0,04095 | 0,34  | 0,354 | 1 |
| Wapl       | 0,342256 | -0,01134 | 0,647 | 0,672 | 1 |
| Ankrd42    | 0,342277 | -0,00539 | 0,011 | 0,016 | 1 |
| Tspan14    | 0,342287 | 0,020852 | 0,641 | 0,62  | 1 |
| Dazap2     | 0,342415 | -0,01705 | 0,904 | 0,924 | 1 |
| Lcat       | 0,342487 | 0,022926 | 0,112 | 0,098 | 1 |
| Pck2       | 0,342565 | -0,00374 | 0,011 | 0,016 | 1 |
| Canx       | 0,342658 | 0,032079 | 0,991 | 0,993 | 1 |
| Bcl2l11    | 0,342663 | 0,036525 | 0,21  | 0,195 | 1 |
| Rab7       | 0,342734 | 0,016054 | 0,99  | 0,985 | 1 |
| Mtfmt      | 0,342813 | -0,01152 | 0,106 | 0,122 | 1 |
| Prox2      | 0,342824 | -0,01497 | 0,063 | 0,075 | 1 |
| Rbks       | 0,342897 | -0,01039 | 0,133 | 0,151 | 1 |
| Zfp429     | 0,342902 | -0,00988 | 0,027 | 0,036 | 1 |
| Zadh2      | 0,342964 | -0,02492 | 0,237 | 0,257 | 1 |
| Cox17      | 0,343174 | -0,01561 | 0,935 | 0,928 | 1 |
| Pdzd4      | 0,343274 | -0,0063  | 0,011 | 0,016 | 1 |
| C1d        | 0,343503 | 0,028368 | 0,545 | 0,517 | 1 |

|           |          |          |       |       |   |
|-----------|----------|----------|-------|-------|---|
| Hacl1     | 0,343653 | -0,02695 | 0,14  | 0,156 | 1 |
| Gm26804   | 0,34369  | -0,00442 | 0,011 | 0,016 | 1 |
| Enc1      | 0,34369  | -0,00442 | 0,011 | 0,016 | 1 |
| Klc2      | 0,343772 | -0,01    | 0,075 | 0,088 | 1 |
| Gm45356   | 0,343787 | -0,01424 | 0,06  | 0,072 | 1 |
| Ppif      | 0,344049 | 0,011143 | 0,106 | 0,091 | 1 |
| Homez     | 0,344291 | 0,01104  | 0,071 | 0,059 | 1 |
| Lamp2     | 0,344401 | 0,024148 | 0,987 | 0,995 | 1 |
| Erich3    | 0,344497 | -0,01573 | 0,102 | 0,117 | 1 |
| Fam207a   | 0,344698 | 0,027242 | 0,266 | 0,246 | 1 |
| Rbm12     | 0,344745 | 0,030499 | 0,206 | 0,19  | 1 |
| Dlgap4    | 0,344777 | 0,020209 | 0,181 | 0,163 | 1 |
| Atp1a3    | 0,345107 | 0,002345 | 0,011 | 0,016 | 1 |
| Pogz      | 0,345189 | 0,046368 | 0,274 | 0,262 | 1 |
| Dnajc8    | 0,345235 | -0,01523 | 0,786 | 0,811 | 1 |
| Nelfcd    | 0,345718 | -0,01506 | 0,276 | 0,298 | 1 |
| Clpx      | 0,345732 | -0,02616 | 0,353 | 0,374 | 1 |
| Jarid2    | 0,345947 | 0,028294 | 0,479 | 0,455 | 1 |
| Ftsj1     | 0,345983 | -0,01749 | 0,289 | 0,311 | 1 |
| Taf5      | 0,346232 | 0,009185 | 0,161 | 0,143 | 1 |
| Taf1      | 0,346463 | 0,031806 | 0,697 | 0,675 | 1 |
| Vcpkmt    | 0,3465   | -0,01109 | 0,03  | 0,039 | 1 |
| Suox      | 0,346524 | 0,022228 | 0,094 | 0,081 | 1 |
| Ifi27l2a  | 0,346543 | 0,08777  | 0,086 | 0,101 | 1 |
| Fnip1     | 0,346643 | -0,02901 | 0,714 | 0,743 | 1 |
| Zfp180    | 0,346776 | 0,02357  | 0,297 | 0,278 | 1 |
| Vwa8      | 0,346804 | -0,00526 | 0,239 | 0,263 | 1 |
| Atg10     | 0,346976 | -0,00978 | 0,184 | 0,205 | 1 |
| Vcp       | 0,346992 | -0,0079  | 0,986 | 0,989 | 1 |
| Tspyl1    | 0,347142 | -0,01716 | 0,622 | 0,654 | 1 |
| Gm10762   | 0,347351 | -0,0077  | 0,027 | 0,036 | 1 |
| Eif2ak4   | 0,347379 | 0,019248 | 0,131 | 0,115 | 1 |
| Tmod3     | 0,347391 | -0,01139 | 0,278 | 0,301 | 1 |
| Ccdc61    | 0,347461 | 0,019305 | 0,139 | 0,124 | 1 |
| 2010109A: | 0,347648 | -0,01318 | 0,018 | 0,024 | 1 |
| Tmem141   | 0,347725 | 0,036705 | 0,316 | 0,294 | 1 |
| Dtx1      | 0,347864 | 0,020429 | 0,045 | 0,036 | 1 |
| Spsb2     | 0,347895 | -0,01311 | 0,116 | 0,132 | 1 |
| Swap70    | 0,347952 | 0,001381 | 0,011 | 0,016 | 1 |
| Mfsd2a    | 0,348032 | -0,01967 | 0,084 | 0,098 | 1 |
| Hoxd3os1  | 0,348099 | 0,036566 | 0,389 | 0,371 | 1 |
| Lztr1     | 0,348165 | 0,028164 | 0,471 | 0,449 | 1 |
| Ylpm1     | 0,348221 | -0,02227 | 0,579 | 0,582 | 1 |
| Snrnp48   | 0,348274 | -0,01427 | 0,702 | 0,722 | 1 |
| Pcdhb15   | 0,348339 | -0,00647 | 0,018 | 0,024 | 1 |
| 0610009B: | 0,348362 | 0,044405 | 0,423 | 0,411 | 1 |
| Smarca4   | 0,348401 | 0,021649 | 0,614 | 0,574 | 1 |
| Pigw      | 0,348442 | -0,00941 | 0,018 | 0,024 | 1 |
| Nme2      | 0,348486 | 0,010247 | 0,115 | 0,099 | 1 |
| Fam189b   | 0,348488 | -0,0031  | 0,075 | 0,088 | 1 |
| Sft2d1    | 0,348609 | -0,01768 | 0,773 | 0,803 | 1 |
| Cox6b2    | 0,348628 | -0,01748 | 0,09  | 0,104 | 1 |

|          |          |          |       |       |   |
|----------|----------|----------|-------|-------|---|
| Tmem175  | 0,34864  | 0,030892 | 0,197 | 0,18  | 1 |
| Rab9     | 0,348661 | -0,03505 | 0,563 | 0,595 | 1 |
| Gdap2    | 0,348896 | -0,01558 | 0,148 | 0,166 | 1 |
| Mfsd4b1  | 0,349075 | -0,01109 | 0,03  | 0,039 | 1 |
| Tob1     | 0,349116 | -0,01264 | 0,775 | 0,798 | 1 |
| Nup160   | 0,349167 | -0,01029 | 0,183 | 0,203 | 1 |
| Micu1    | 0,349183 | -0,00889 | 0,656 | 0,698 | 1 |
| Pbrm1    | 0,34924  | -0,00296 | 0,762 | 0,767 | 1 |
| Ankra2   | 0,349266 | 0,021347 | 0,5   | 0,483 | 1 |
| Sdhb     | 0,349644 | -0,0132  | 0,695 | 0,73  | 1 |
| Cox11    | 0,349738 | 0,011841 | 0,095 | 0,081 | 1 |
| Tor2a    | 0,349897 | 0,018443 | 0,197 | 0,179 | 1 |
| Vash1    | 0,35003  | 0,009655 | 0,034 | 0,026 | 1 |
| Ppm1m    | 0,350047 | -0,01689 | 0,134 | 0,151 | 1 |
| Pmpcb    | 0,35006  | -0,01837 | 0,434 | 0,455 | 1 |
| 1700017B | 0,350124 | 0,01023  | 0,047 | 0,037 | 1 |
| Faah     | 0,350179 | -0,03775 | 0,337 | 0,356 | 1 |
| Gm26649  | 0,350181 | 0,01218  | 0,032 | 0,024 | 1 |
| Ccdc84   | 0,350337 | -0,01128 | 0,16  | 0,179 | 1 |
| Ddx5     | 0,350363 | 0,043438 | 1     | 1     | 1 |
| Rtkn2    | 0,350452 | -0,03418 | 0,351 | 0,371 | 1 |
| Cst3     | 0,350513 | -0,01544 | 0,8   | 0,831 | 1 |
| Med31    | 0,350539 | -0,01094 | 0,51  | 0,545 | 1 |
| Btbd7    | 0,350614 | -0,01264 | 0,417 | 0,439 | 1 |
| Kctd21   | 0,350782 | -0,00703 | 0,12  | 0,137 | 1 |
| Fam8a1   | 0,3508   | -0,02266 | 0,324 | 0,345 | 1 |
| Aggf1    | 0,350852 | 0,039049 | 0,447 | 0,434 | 1 |
| Snx2     | 0,351028 | 0,037281 | 0,493 | 0,481 | 1 |
| Gfap     | 0,351179 | 0,038826 | 0,213 | 0,197 | 1 |
| Fastkd2  | 0,351226 | -0,01663 | 0,121 | 0,137 | 1 |
| Amer1    | 0,351234 | 0,021205 | 0,112 | 0,098 | 1 |
| Fgfr4    | 0,351414 | 0,012392 | 0,047 | 0,037 | 1 |
| Gm13830  | 0,351515 | 0,015449 | 0,084 | 0,072 | 1 |
| Rnf185   | 0,351561 | -0,02597 | 0,15  | 0,166 | 1 |
| Nr3c2    | 0,351625 | -0,00495 | 0,114 | 0,13  | 1 |
| Rapgef1  | 0,351694 | -0,02544 | 0,209 | 0,229 | 1 |
| Gnl3     | 0,351746 | 0,044201 | 0,541 | 0,514 | 1 |
| Akap8l   | 0,352008 | 0,030563 | 0,549 | 0,538 | 1 |
| Kin      | 0,352189 | 0,048035 | 0,289 | 0,275 | 1 |
| Dbil5    | 0,352205 | -0,01743 | 0,084 | 0,098 | 1 |
| Vps26a   | 0,352271 | -0,02391 | 0,471 | 0,491 | 1 |
| Slc35a3  | 0,352294 | 0,025153 | 0,255 | 0,236 | 1 |
| Ubt2     | 0,352428 | 0,012476 | 0,086 | 0,073 | 1 |
| Armc10   | 0,352481 | -0,01893 | 0,166 | 0,184 | 1 |
| Dhx9     | 0,35257  | 0,032939 | 0,568 | 0,556 | 1 |
| B3gnt1   | 0,352595 | 0,01104  | 0,071 | 0,059 | 1 |
| Pat1     | 0,35293  | -0,01167 | 0,182 | 0,2   | 1 |
| Colgalt1 | 0,352943 | -0,01487 | 0,327 | 0,351 | 1 |
| Lmbrd2   | 0,35313  | -0,03053 | 0,592 | 0,602 | 1 |
| Cep63    | 0,353205 | -0,01779 | 0,197 | 0,216 | 1 |
| Dnajc7   | 0,353266 | -0,01527 | 0,767 | 0,785 | 1 |
| Plekha2  | 0,353294 | 0,053753 | 0,237 | 0,223 | 1 |



|          |          |          |       |       |   |
|----------|----------|----------|-------|-------|---|
| Zfp64    | 0,353345 | 0,016557 | 0,174 | 0,156 | 1 |
| Gm7694   | 0,353727 | -0,00105 | 0,027 | 0,036 | 1 |
| Rras2    | 0,353874 | 0,018407 | 0,056 | 0,046 | 1 |
| Nvl      | 0,353904 | -0,01361 | 0,343 | 0,371 | 1 |
| Zmynd11  | 0,354005 | -0,00233 | 0,682 | 0,724 | 1 |
| Tmem38a  | 0,35409  | 0,01904  | 0,129 | 0,114 | 1 |
| Ccdc22   | 0,354168 | -0,00396 | 0,265 | 0,293 | 1 |
| Endog    | 0,354195 | 0,024038 | 0,173 | 0,156 | 1 |
| Haghl    | 0,354396 | -0,02514 | 0,65  | 0,675 | 1 |
| Dcaf6    | 0,354462 | 0,026131 | 0,35  | 0,33  | 1 |
| Tmem104  | 0,354623 | -0,02722 | 0,136 | 0,151 | 1 |
| Dffb     | 0,354813 | -0,00839 | 0,063 | 0,075 | 1 |
| Mt3      | 0,354932 | -0,00841 | 0,183 | 0,203 | 1 |
| Exoc3    | 0,35499  | -0,01746 | 0,728 | 0,756 | 1 |
| Sh3glb2  | 0,354992 | -0,02649 | 0,568 | 0,58  | 1 |
| Vps33b   | 0,355034 | 0,019116 | 0,164 | 0,146 | 1 |
| Mgat3    | 0,35512  | -0,01699 | 0,487 | 0,52  | 1 |
| Arl16    | 0,355247 | -0,02137 | 0,181 | 0,198 | 1 |
| Spink10  | 0,355284 | 0,009297 | 0,047 | 0,037 | 1 |
| Ddx23    | 0,355642 | -0,00354 | 0,282 | 0,311 | 1 |
| BC005624 | 0,355734 | -0,02741 | 0,723 | 0,743 | 1 |
| Gm32005  | 0,355803 | -0,02022 | 0,098 | 0,112 | 1 |
| Lurap1l  | 0,355814 | 0,007138 | 0,032 | 0,024 | 1 |
| Vamp3    | 0,355914 | 0,036095 | 0,787 | 0,793 | 1 |
| Ppa1     | 0,356034 | -0,01292 | 0,186 | 0,207 | 1 |
| Atp6ap1  | 0,356066 | 0,021988 | 0,971 | 0,966 | 1 |
| Wscd2    | 0,356098 | -0,00872 | 0,042 | 0,052 | 1 |
| Raph1    | 0,356155 | 0,024673 | 0,125 | 0,111 | 1 |
| Nomo1    | 0,356178 | 0,023802 | 0,271 | 0,249 | 1 |
| Lym9     | 0,356473 | 0,036961 | 0,198 | 0,184 | 1 |
| Alyref2  | 0,356743 | 0,017235 | 0,139 | 0,124 | 1 |
| Uap1     | 0,356756 | -0,01547 | 0,407 | 0,439 | 1 |
| Katna1   | 0,356904 | -0,00245 | 0,197 | 0,22  | 1 |
| Actb     | 0,357037 | 0,026699 | 0,999 | 1     | 1 |
| Ubr7     | 0,357087 | -0,01795 | 0,255 | 0,276 | 1 |
| Uevld    | 0,357169 | -0,01522 | 0,09  | 0,104 | 1 |
| Iffo2    | 0,357233 | -0,00703 | 0,069 | 0,081 | 1 |
| Patz1    | 0,35739  | -0,02495 | 0,304 | 0,325 | 1 |
| Cdkal1   | 0,357457 | -0,01883 | 0,32  | 0,343 | 1 |
| Mef2d    | 0,35756  | -0,00202 | 0,266 | 0,291 | 1 |
| Ethe1    | 0,357765 | -0,02073 | 0,274 | 0,293 | 1 |
| Mrpl4    | 0,357949 | -0,02822 | 0,353 | 0,376 | 1 |
| Mindy4   | 0,357969 | -0,01173 | 0,06  | 0,072 | 1 |
| Aldh1a1  | 0,358109 | -0,01871 | 0,134 | 0,151 | 1 |
| Pet100   | 0,35812  | 0,036936 | 0,801 | 0,808 | 1 |
| Rab39b   | 0,358169 | -0,01993 | 0,376 | 0,402 | 1 |
| Atxn3    | 0,358242 | -0,01847 | 0,301 | 0,324 | 1 |
| Gm13075  | 0,358415 | -0,02343 | 0,036 | 0,046 | 1 |
| 1700113A | 0,358599 | -0,02525 | 0,126 | 0,14  | 1 |
| Wbp1l    | 0,358759 | -0,01097 | 0,428 | 0,46  | 1 |
| Ctxn1    | 0,359008 | 0,005554 | 0,032 | 0,024 | 1 |
| St7      | 0,359114 | 0,020809 | 0,129 | 0,114 | 1 |

|          |          |          |       |       |   |
|----------|----------|----------|-------|-------|---|
| Pcbp2    | 0,359168 | 0,024553 | 0,977 | 0,982 | 1 |
| Spin4    | 0,359178 | -0,0106  | 0,039 | 0,049 | 1 |
| Cln8     | 0,359216 | 0,034495 | 0,652 | 0,631 | 1 |
| Sec24d   | 0,35922  | 0,009313 | 0,127 | 0,111 | 1 |
| Ankrd61  | 0,359491 | 0,010291 | 0,028 | 0,021 | 1 |
| Synj2bp  | 0,359519 | -0,02038 | 0,329 | 0,353 | 1 |
| Tomm5    | 0,359627 | -0,0264  | 0,488 | 0,509 | 1 |
| Timm22   | 0,359645 | -0,00983 | 0,428 | 0,454 | 1 |
| Eef1b2   | 0,359705 | 0,03736  | 0,929 | 0,928 | 1 |
| Mapk8ip3 | 0,359926 | 0,032013 | 0,737 | 0,724 | 1 |
| Erp27    | 0,359996 | -0,00446 | 0,033 | 0,042 | 1 |
| Glb1     | 0,360068 | -0,00624 | 0,039 | 0,049 | 1 |
| Defb42   | 0,360163 | -0,0158  | 0,139 | 0,156 | 1 |
| Cacna2d4 | 0,360359 | 0,042556 | 0,064 | 0,054 | 1 |
| Rilpl2   | 0,360369 | -0,01865 | 0,206 | 0,224 | 1 |
| Ccdc17   | 0,360556 | -0,00749 | 0,021 | 0,028 | 1 |
| Smim11   | 0,360621 | -0,01035 | 0,504 | 0,54  | 1 |
| Hspbap1  | 0,360833 | -0,01778 | 0,095 | 0,109 | 1 |
| Hexim1   | 0,36089  | 0,071537 | 0,278 | 0,267 | 1 |
| Gm17484  | 0,360925 | -0,00899 | 0,045 | 0,055 | 1 |
| Zdhhc3   | 0,361128 | -0,01836 | 0,334 | 0,358 | 1 |
| Fibin    | 0,361262 | -0,02055 | 0,145 | 0,163 | 1 |
| Gtf2a2   | 0,361417 | -0,01924 | 0,518 | 0,55  | 1 |
| Qpctl    | 0,361435 | 0,021884 | 0,183 | 0,166 | 1 |
| Mal      | 0,361609 | 0,027917 | 0,998 | 1     | 1 |
| Mccc2    | 0,361614 | -0,01458 | 0,16  | 0,177 | 1 |
| H2-D1    | 0,361627 | -0,18903 | 0,741 | 0,714 | 1 |
| Ahcyl2   | 0,361677 | -0,01727 | 0,482 | 0,507 | 1 |
| AY036118 | 0,361687 | 0,088121 | 0,953 | 0,969 | 1 |
| Gm26870  | 0,361877 | 0,283649 | 0,009 | 0,005 | 1 |
| Mtfp1    | 0,361902 | -0,00558 | 0,045 | 0,055 | 1 |
| Elovl6   | 0,361943 | 0,034763 | 0,708 | 0,704 | 1 |
| Etfa     | 0,361951 | -0,01781 | 0,283 | 0,302 | 1 |
| Aplp2    | 0,361966 | -0,01343 | 0,998 | 0,993 | 1 |
| Letm1    | 0,362206 | -0,02585 | 0,429 | 0,45  | 1 |
| Gm26673  | 0,36222  | -0,00885 | 0,039 | 0,049 | 1 |
| Ctu2     | 0,36237  | -0,01566 | 0,179 | 0,197 | 1 |
| Gm11110  | 0,362453 | 0,020429 | 0,05  | 0,041 | 1 |
| Pxk      | 0,362489 | -0,00916 | 0,413 | 0,447 | 1 |
| Armcx3   | 0,362537 | 0,058303 | 0,454 | 0,455 | 1 |
| Nasp     | 0,362553 | 0,063679 | 0,434 | 0,424 | 1 |
| Adipor2  | 0,362586 | -0,0258  | 0,916 | 0,917 | 1 |
| Dner     | 0,362676 | 0,012536 | 0,065 | 0,054 | 1 |
| Mfsd4b4  | 0,3627   | 0,010312 | 0,028 | 0,021 | 1 |
| Fhl3     | 0,362833 | -0,01204 | 0,014 | 0,02  | 1 |
| Map1a    | 0,362879 | 0,015872 | 0,993 | 0,992 | 1 |
| Trip13   | 0,363034 | 0,010062 | 0,009 | 0,005 | 1 |
| Gls2     | 0,363042 | -0,01466 | 0,095 | 0,109 | 1 |
| Rrp12    | 0,363145 | -0,00914 | 0,102 | 0,117 | 1 |
| Hspa4    | 0,36321  | -0,01282 | 0,704 | 0,715 | 1 |
| Tpd52    | 0,363294 | -0,01993 | 0,808 | 0,826 | 1 |
| Atp1a2   | 0,363358 | -0,02538 | 0,113 | 0,128 | 1 |

|           |          |          |       |       |   |
|-----------|----------|----------|-------|-------|---|
| BC024139  | 0,363379 | -0,01099 | 0,074 | 0,086 | 1 |
| Gm43738   | 0,363611 | 0,005871 | 0,009 | 0,005 | 1 |
| 0610005C: | 0,363611 | 0,005871 | 0,009 | 0,005 | 1 |
| Gm49289   | 0,363611 | 0,005871 | 0,009 | 0,005 | 1 |
| Gm47785   | 0,363611 | 0,005871 | 0,009 | 0,005 | 1 |
| Olf961    | 0,363611 | 0,005871 | 0,009 | 0,005 | 1 |
| 6030408B: | 0,363611 | 0,005871 | 0,009 | 0,005 | 1 |
| Gm11027   | 0,363611 | 0,009747 | 0,009 | 0,005 | 1 |
| Spc25     | 0,363611 | 0,006841 | 0,009 | 0,005 | 1 |
| Hoxc6     | 0,363841 | -0,01091 | 0,024 | 0,031 | 1 |
| Ccdc43    | 0,363876 | 0,000924 | 0,2   | 0,223 | 1 |
| Gm29666   | 0,364045 | 0,00276  | 0,033 | 0,042 | 1 |
| Tufm      | 0,364064 | -0,03335 | 0,289 | 0,304 | 1 |
| Pcx       | 0,364142 | -0,02547 | 0,436 | 0,452 | 1 |
| 4732496C: | 0,36419  | 0,0049   | 0,009 | 0,005 | 1 |
| 9430037G: | 0,36419  | 0,0049   | 0,009 | 0,005 | 1 |
| Emid1     | 0,36419  | 0,0049   | 0,009 | 0,005 | 1 |
| 2810408A: | 0,36419  | 0,0049   | 0,009 | 0,005 | 1 |
| Gm26873   | 0,36419  | 0,0049   | 0,009 | 0,005 | 1 |
| Mdm1      | 0,364265 | -0,01415 | 0,062 | 0,073 | 1 |
| Acadm     | 0,364266 | -0,0373  | 0,361 | 0,38  | 1 |
| Rybp      | 0,364557 | -0,03233 | 0,56  | 0,579 | 1 |
| Plekho2   | 0,364574 | 0,024548 | 0,178 | 0,161 | 1 |
| Idh3g     | 0,364579 | 0,048255 | 0,571 | 0,584 | 1 |
| Cpne2     | 0,364629 | -0,00688 | 0,063 | 0,075 | 1 |
| Pex2      | 0,364633 | -0,0318  | 0,662 | 0,686 | 1 |
| Flnc      | 0,364634 | 0,026528 | 0,151 | 0,135 | 1 |
| Fam227b   | 0,36477  | 0,003927 | 0,009 | 0,005 | 1 |
| Helz2     | 0,36477  | 0,003927 | 0,009 | 0,005 | 1 |
| A830082K: | 0,36477  | 0,003927 | 0,009 | 0,005 | 1 |
| Notch4    | 0,36477  | 0,003927 | 0,009 | 0,005 | 1 |
| Nme5      | 0,36477  | 0,003927 | 0,009 | 0,005 | 1 |
| Numb      | 0,364825 | -0,01541 | 0,25  | 0,27  | 1 |
| Exosc9    | 0,364945 | -0,02161 | 0,251 | 0,272 | 1 |
| Copz1     | 0,364974 | 0,032628 | 0,509 | 0,501 | 1 |
| Nsmce2    | 0,365141 | 0,038439 | 0,471 | 0,459 | 1 |
| Nfkbie    | 0,36516  | 0,005224 | 0,009 | 0,005 | 1 |
| Abce1     | 0,365275 | -0,0096  | 0,421 | 0,447 | 1 |
| Sptlc2    | 0,365468 | -0,02752 | 0,473 | 0,489 | 1 |
| Ypel5     | 0,365518 | -0,036   | 0,455 | 0,475 | 1 |
| Ptpn23    | 0,365831 | 0,020417 | 0,273 | 0,252 | 1 |
| Cdyl      | 0,365969 | -0,01872 | 0,148 | 0,164 | 1 |
| Rcor3     | 0,366057 | 0,026374 | 0,507 | 0,488 | 1 |
| Gm26830   | 0,36614  | -0,00659 | 0,014 | 0,02  | 1 |
| Hyal3     | 0,366266 | -0,0063  | 0,014 | 0,02  | 1 |
| Sec22b    | 0,366276 | -0,0043  | 0,383 | 0,421 | 1 |
| Atp5s     | 0,366285 | -0,00672 | 0,182 | 0,202 | 1 |
| Hmgn5     | 0,3663   | -0,01906 | 0,2   | 0,218 | 1 |
| Uqcrh     | 0,366414 | -0,01947 | 0,961 | 0,963 | 1 |
| Zufsp     | 0,366458 | -0,0077  | 0,266 | 0,289 | 1 |
| Cbln1     | 0,366472 | -0,00013 | 0,03  | 0,023 | 1 |
| Gm45733   | 0,366516 | 0,00231  | 0,009 | 0,005 | 1 |

|           |          |          |       |       |   |
|-----------|----------|----------|-------|-------|---|
| Nol9      | 0,366519 | 0,014364 | 0,1   | 0,086 | 1 |
| Zfp335os  | 0,366526 | -0,00568 | 0,014 | 0,02  | 1 |
| Gm17477   | 0,366532 | 0,011596 | 0,026 | 0,02  | 1 |
| Psma1     | 0,366595 | -0,01975 | 0,638 | 0,662 | 1 |
| Gnb4      | 0,366765 | 0,03565  | 0,53  | 0,509 | 1 |
| Rps7      | 0,366926 | 0,037231 | 0,982 | 0,976 | 1 |
| Hic2      | 0,366929 | 0,022375 | 0,077 | 0,065 | 1 |
| Rnf113a2  | 0,366992 | -0,01909 | 0,295 | 0,312 | 1 |
| Ikzf2     | 0,367045 | 0,011315 | 0,346 | 0,319 | 1 |
| Klhl40    | 0,367094 | 0,01315  | 0,065 | 0,054 | 1 |
| Zbtb39    | 0,367107 | -0,01096 | 0,104 | 0,119 | 1 |
| Zcchc18   | 0,36726  | 0,028855 | 0,286 | 0,267 | 1 |
| Bcr       | 0,367369 | -0,0275  | 0,202 | 0,22  | 1 |
| Cnih4     | 0,367597 | -0,02321 | 0,545 | 0,567 | 1 |
| Creld2    | 0,367643 | -0,01898 | 0,255 | 0,276 | 1 |
| Itga10    | 0,367684 | 0,001668 | 0,009 | 0,005 | 1 |
| Pgls      | 0,367725 | -0,02781 | 0,48  | 0,507 | 1 |
| Tmem8     | 0,367736 | 0,01339  | 0,041 | 0,033 | 1 |
| Tfap4     | 0,367803 | -0,01232 | 0,135 | 0,151 | 1 |
| Eva1c     | 0,367834 | 0,008738 | 0,026 | 0,02  | 1 |
| Syt14     | 0,367859 | -0,00534 | 0,014 | 0,02  | 1 |
| Gart      | 0,367922 | 0,028875 | 0,418 | 0,4   | 1 |
| 2210016F1 | 0,368116 | 0,032836 | 0,219 | 0,202 | 1 |
| Masp1     | 0,368375 | -0,01995 | 0,26  | 0,285 | 1 |
| Slc25a11  | 0,368402 | 0,026119 | 0,519 | 0,498 | 1 |
| Nbeal1    | 0,368546 | -0,00575 | 0,583 | 0,605 | 1 |
| Cmah      | 0,368596 | -0,00553 | 0,048 | 0,059 | 1 |
| Pom121    | 0,36861  | -0,0261  | 0,396 | 0,423 | 1 |
| Mc1r      | 0,368661 | -0,00659 | 0,014 | 0,02  | 1 |
| Plxdc2    | 0,368796 | 0,014265 | 0,935 | 0,924 | 1 |
| Tmed5     | 0,368858 | -0,01251 | 0,773 | 0,8   | 1 |
| Ccser1    | 0,369366 | 0,009051 | 0,026 | 0,02  | 1 |
| Kdm7a     | 0,369414 | -0,02834 | 0,278 | 0,296 | 1 |
| Marf1     | 0,369417 | -0,01945 | 0,664 | 0,686 | 1 |
| Bet1l     | 0,369703 | -0,01225 | 0,387 | 0,416 | 1 |
| Mrpl32    | 0,369775 | 0,032818 | 0,369 | 0,353 | 1 |
| Zbtb41    | 0,369794 | -0,01374 | 0,257 | 0,281 | 1 |
| Cln6      | 0,370071 | -0,01511 | 0,044 | 0,054 | 1 |
| Capn2     | 0,370213 | 0,030496 | 0,516 | 0,504 | 1 |
| Ppp2r5b   | 0,37023  | 0,031601 | 0,553 | 0,55  | 1 |
| Gm43674   | 0,370272 | -0,00742 | 0,024 | 0,031 | 1 |
| Herc2     | 0,370369 | 0,031336 | 0,675 | 0,673 | 1 |
| Tmem126a  | 0,370461 | 0,021338 | 0,382 | 0,359 | 1 |
| Zkscan5   | 0,370462 | 0,018818 | 0,147 | 0,132 | 1 |
| Clspn     | 0,370609 | 0,011596 | 0,025 | 0,018 | 1 |
| Fkbp15    | 0,370702 | 0,026204 | 0,352 | 0,328 | 1 |
| Fam160b2  | 0,37072  | 0,03509  | 0,153 | 0,138 | 1 |
| Nudt15    | 0,370771 | -0,00679 | 0,045 | 0,055 | 1 |
| Nipal4    | 0,370824 | -0,03066 | 0,587 | 0,597 | 1 |
| Dync1li1  | 0,370855 | -0,02543 | 0,455 | 0,483 | 1 |
| Polr3d    | 0,371007 | 0,044837 | 0,369 | 0,354 | 1 |
| Mapk14    | 0,371072 | 0,041589 | 0,266 | 0,252 | 1 |

|           |          |          |       |       |   |
|-----------|----------|----------|-------|-------|---|
| Ggnbp2    | 0,371086 | -0,00735 | 0,649 | 0,663 | 1 |
| Ube2e2    | 0,371109 | -0,01911 | 0,745 | 0,767 | 1 |
| Rragb     | 0,371173 | -0,01685 | 0,154 | 0,171 | 1 |
| Dnttip2   | 0,371193 | -0,0276  | 0,54  | 0,553 | 1 |
| Fam222b   | 0,371498 | -0,01138 | 0,18  | 0,198 | 1 |
| Nras      | 0,371774 | -0,00616 | 0,678 | 0,712 | 1 |
| Ugp2      | 0,371911 | -0,0138  | 0,615 | 0,637 | 1 |
| Mgat5     | 0,37235  | -0,01707 | 0,185 | 0,203 | 1 |
| Twsg1     | 0,372456 | -0,00905 | 0,244 | 0,265 | 1 |
| Nabp2     | 0,372548 | -0,01726 | 0,704 | 0,724 | 1 |
| Pcmt2     | 0,372649 | -0,02393 | 0,396 | 0,423 | 1 |
| Vdac3     | 0,372861 | -0,01728 | 0,859 | 0,863 | 1 |
| Mnd1      | 0,37296  | -0,00705 | 0,006 | 0,01  | 1 |
| 4930599N  | 0,37296  | -0,00866 | 0,006 | 0,01  | 1 |
| Gbp4      | 0,37296  | -0,01981 | 0,006 | 0,01  | 1 |
| Dock1     | 0,372973 | -0,02857 | 0,761 | 0,776 | 1 |
| Dbp       | 0,373    | 0,029444 | 0,205 | 0,187 | 1 |
| Hist1h4d  | 0,373127 | -0,00924 | 0,134 | 0,151 | 1 |
| CAA0114   | 0,373191 | -0,01049 | 0,029 | 0,037 | 1 |
| Mkl1      | 0,373212 | 0,013545 | 0,061 | 0,05  | 1 |
| Atp11c    | 0,373233 | -0,00491 | 0,157 | 0,176 | 1 |
| Rabggtb   | 0,37347  | 0,032545 | 0,301 | 0,283 | 1 |
| 1500015L2 | 0,37372  | -0,02088 | 0,096 | 0,109 | 1 |
| Gcc2      | 0,373767 | -0,00168 | 0,587 | 0,623 | 1 |
| Spns1     | 0,373808 | -0,00113 | 0,482 | 0,515 | 1 |
| 119000710 | 0,373884 | 0,024061 | 0,188 | 0,172 | 1 |
| A930017K  | 0,373996 | 0,032244 | 0,123 | 0,109 | 1 |
| March9    | 0,37403  | 0,016246 | 0,068 | 0,057 | 1 |
| Ssbp1     | 0,374101 | 0,001802 | 0,411 | 0,446 | 1 |
| Gm11992   | 0,374138 | -0,00545 | 0,006 | 0,01  | 1 |
| Ppp1r2    | 0,37425  | 0,016289 | 0,59  | 0,546 | 1 |
| Gpr75     | 0,374616 | 0,013617 | 0,05  | 0,041 | 1 |
| Cndp2     | 0,374619 | 0,033459 | 0,34  | 0,322 | 1 |
| Noa1      | 0,374715 | 0,014028 | 0,207 | 0,189 | 1 |
| Thap1     | 0,374764 | -0,05895 | 0,213 | 0,229 | 1 |
| Gm9801    | 0,374774 | -0,01214 | 0,056 | 0,067 | 1 |
| B3galnt1  | 0,374776 | 0,033129 | 0,184 | 0,169 | 1 |
| Gm13546   | 0,374825 | 0,00301  | 0,025 | 0,018 | 1 |
| Rnd3      | 0,37489  | 0,000408 | 0,181 | 0,2   | 1 |
| Sec23a    | 0,374993 | -0,01382 | 0,215 | 0,234 | 1 |
| Inpp5a    | 0,375025 | 0,044068 | 0,537 | 0,527 | 1 |
| Tgfb1i1   | 0,375057 | 0,010062 | 0,011 | 0,007 | 1 |
| Nckap5l   | 0,375081 | 0,008066 | 0,041 | 0,033 | 1 |
| 4930570G  | 0,375089 | 0,010022 | 0,023 | 0,016 | 1 |
| Dlc1      | 0,375093 | -0,0033  | 0,042 | 0,052 | 1 |
| Bphl      | 0,375107 | 0,018095 | 0,21  | 0,192 | 1 |
| Wsb1      | 0,375129 | 0,054136 | 0,463 | 0,452 | 1 |
| Ccdc186   | 0,375312 | 0,029874 | 0,474 | 0,454 | 1 |
| Gm12827   | 0,375318 | -0,00384 | 0,006 | 0,01  | 1 |
| Slc12a3   | 0,375318 | -0,00384 | 0,006 | 0,01  | 1 |
| Unc80     | 0,37532  | -0,00447 | 0,006 | 0,01  | 1 |
| Gm17281   | 0,37532  | -0,00447 | 0,006 | 0,01  | 1 |

|           |          |          |       |       |   |
|-----------|----------|----------|-------|-------|---|
| Gpx3      | 0,37532  | -0,00447 | 0,006 | 0,01  | 1 |
| Gm30655   | 0,37532  | -0,00447 | 0,006 | 0,01  | 1 |
| Slc39a10  | 0,375349 | 0,03135  | 0,149 | 0,135 | 1 |
| 5830454EC | 0,375405 | 0,004918 | 0,026 | 0,02  | 1 |
| Gabra2    | 0,375515 | 0,002701 | 0,026 | 0,02  | 1 |
| Cog1      | 0,375648 | 0,025673 | 0,203 | 0,187 | 1 |
| Zdhhc16   | 0,375672 | -0,02219 | 0,184 | 0,202 | 1 |
| Mapk8     | 0,375813 | -0,03292 | 0,314 | 0,335 | 1 |
| Mob3b     | 0,375823 | -0,03244 | 0,595 | 0,566 | 1 |
| Zfp263    | 0,375846 | -0,00583 | 0,199 | 0,22  | 1 |
| Rnf217    | 0,375862 | 0,008098 | 0,025 | 0,018 | 1 |
| Osbpl6    | 0,375947 | 0,020858 | 0,057 | 0,047 | 1 |
| Ggps1     | 0,375965 | -0,01289 | 0,451 | 0,481 | 1 |
| Bcdin3d   | 0,37614  | -0,02261 | 0,17  | 0,187 | 1 |
| Irx5      | 0,376175 | 0,025145 | 0,075 | 0,063 | 1 |
| 0610012GI | 0,376178 | -0,01544 | 0,501 | 0,519 | 1 |
| 4930539JC | 0,376345 | -0,01197 | 0,05  | 0,06  | 1 |
| Brd8      | 0,37646  | -0,0179  | 0,619 | 0,644 | 1 |
| Hbq1b     | 0,376468 | 0,011027 | 0,011 | 0,007 | 1 |
| Cited4    | 0,376503 | -0,00286 | 0,006 | 0,01  | 1 |
| Mucl2     | 0,376702 | -0,00252 | 0,006 | 0,01  | 1 |
| Fam69a    | 0,376731 | -0,02443 | 0,221 | 0,239 | 1 |
| Luc7l     | 0,376978 | -0,00058 | 0,435 | 0,472 | 1 |
| Kdm8      | 0,376991 | 0,01215  | 0,039 | 0,031 | 1 |
| Hcn1      | 0,377    | 0,01069  | 0,011 | 0,007 | 1 |
| Hdgfl3    | 0,377097 | -0,02221 | 0,662 | 0,691 | 1 |
| Clhc1     | 0,377174 | 0,00813  | 0,011 | 0,007 | 1 |
| Cdkn2d    | 0,377182 | -0,00476 | 0,596 | 0,62  | 1 |
| Slc8b1    | 0,377198 | 0,02724  | 0,148 | 0,133 | 1 |
| Ddb2      | 0,377217 | -0,01484 | 0,086 | 0,099 | 1 |
| Rpl39     | 0,377244 | 0,022717 | 0,989 | 0,984 | 1 |
| Dyx1c1    | 0,377252 | -0,00636 | 0,01  | 0,015 | 1 |
| Tanc1     | 0,377438 | -0,03224 | 0,654 | 0,66  | 1 |
| Zbtb18    | 0,377473 | -0,00787 | 0,151 | 0,169 | 1 |
| Cnot4     | 0,377527 | 0,041685 | 0,517 | 0,501 | 1 |
| Rcl1      | 0,37757  | -0,02346 | 0,19  | 0,208 | 1 |
| Cops8     | 0,377655 | -0,01989 | 0,579 | 0,6   | 1 |
| Fam129c   | 0,37769  | -0,00189 | 0,006 | 0,01  | 1 |
| Lrrn2     | 0,37769  | -0,00092 | 0,006 | 0,01  | 1 |
| Snap29    | 0,377819 | -0,00985 | 0,311 | 0,333 | 1 |
| Gm9917    | 0,377881 | 0,007162 | 0,011 | 0,007 | 1 |
| Acsl6     | 0,377881 | 0,006194 | 0,011 | 0,007 | 1 |
| Hgs.1     | 0,377881 | 0,005224 | 0,011 | 0,007 | 1 |
| Vamp4     | 0,377947 | -0,01332 | 0,411 | 0,434 | 1 |
| Mul1      | 0,378008 | -0,01611 | 0,265 | 0,286 | 1 |
| Sulf2     | 0,378056 | -0,03298 | 0,909 | 0,917 | 1 |
| Fam185a   | 0,378145 | -0,01014 | 0,032 | 0,041 | 1 |
| Mum1      | 0,37822  | -0,00015 | 0,501 | 0,543 | 1 |
| Gpatch11  | 0,37828  | -0,01208 | 0,401 | 0,431 | 1 |
| Pld3      | 0,378426 | 0,028045 | 0,363 | 0,345 | 1 |
| Yjefn3    | 0,37843  | 0,01726  | 0,108 | 0,094 | 1 |
| Traf3ip2  | 0,378517 | -0,00602 | 0,01  | 0,015 | 1 |

|           |          |          |       |       |   |
|-----------|----------|----------|-------|-------|---|
| Pcdhb10   | 0,378518 | 0,008087 | 0,025 | 0,018 | 1 |
| Tmem147c  | 0,378524 | -0,0077  | 0,026 | 0,034 | 1 |
| Maml3     | 0,378587 | -0,01194 | 0,121 | 0,137 | 1 |
| Rab20     | 0,378589 | 0,004254 | 0,011 | 0,007 | 1 |
| Pdf       | 0,378589 | 0,004254 | 0,011 | 0,007 | 1 |
| Nespas    | 0,378672 | -0,00539 | 0,01  | 0,015 | 1 |
| 2810414Nl | 0,378867 | -0,00954 | 0,032 | 0,041 | 1 |
| Gmfg      | 0,378878 | -0,00092 | 0,006 | 0,01  | 1 |
| Mast4     | 0,3789   | 0,027577 | 0,993 | 0,998 | 1 |
| Nek8      | 0,378947 | 0,008448 | 0,011 | 0,007 | 1 |
| 4732471JC | 0,379326 | -0,0168  | 0,102 | 0,115 | 1 |
| Retreg1   | 0,379546 | 0,021645 | 0,943 | 0,943 | 1 |
| Adssl1    | 0,379598 | 0,058377 | 0,912 | 0,901 | 1 |
| Ust       | 0,37974  | -0,01128 | 0,032 | 0,041 | 1 |
| Cggbp1    | 0,379906 | 0,031141 | 0,617 | 0,602 | 1 |
| Tvp23b    | 0,379969 | -0,01056 | 0,447 | 0,478 | 1 |
| Aifm2     | 0,379984 | 0,01731  | 0,108 | 0,094 | 1 |
| R3hcc1    | 0,380027 | -0,01273 | 0,295 | 0,32  | 1 |
| Galnt5    | 0,380069 | 0,001999 | 0,006 | 0,01  | 1 |
| Nos3      | 0,380095 | -0,00442 | 0,01  | 0,015 | 1 |
| Pcbd2     | 0,380189 | -0,02276 | 0,238 | 0,255 | 1 |
| Taz       | 0,380262 | -0,04098 | 0,486 | 0,501 | 1 |
| Prpf4     | 0,380326 | -0,0058  | 0,29  | 0,315 | 1 |
| Rtkn      | 0,380386 | 0,047019 | 0,846 | 0,826 | 1 |
| Snrpa     | 0,38053  | -0,01819 | 0,518 | 0,541 | 1 |
| Rundc1    | 0,380564 | -0,0066  | 0,151 | 0,169 | 1 |
| Zkscan1   | 0,380697 | -0,02141 | 0,274 | 0,293 | 1 |
| Zscan2    | 0,380805 | 0,008697 | 0,039 | 0,031 | 1 |
| Prex2     | 0,380841 | -0,00755 | 0,017 | 0,023 | 1 |
| Cox7b     | 0,380861 | -0,01526 | 0,796 | 0,808 | 1 |
| Ccdc86    | 0,380976 | -0,02131 | 0,255 | 0,275 | 1 |
| Paqr7     | 0,381202 | -0,01549 | 0,19  | 0,208 | 1 |
| Ghr       | 0,381228 | 0,011596 | 0,021 | 0,015 | 1 |
| Selenot   | 0,381228 | 0,024384 | 0,933 | 0,925 | 1 |
| Duxbl3    | 0,381468 | 0,007792 | 0,021 | 0,015 | 1 |
| Ociad1    | 0,381472 | -0,01473 | 0,882 | 0,925 | 1 |
| Larp1b    | 0,381894 | 0,001466 | 0,242 | 0,268 | 1 |
| Dst       | 0,382041 | 0,034291 | 0,995 | 0,99  | 1 |
| Zfpm2     | 0,382159 | -0,00451 | 0,026 | 0,034 | 1 |
| Slc1a2    | 0,382284 | -0,01738 | 0,089 | 0,102 | 1 |
| D730045Bl | 0,382305 | 0,009413 | 0,013 | 0,008 | 1 |
| Setd1a    | 0,382346 | -0,01545 | 0,151 | 0,167 | 1 |
| Acin1     | 0,382355 | -0,00035 | 0,798 | 0,828 | 1 |
| Poglut1   | 0,382391 | 0,003451 | 0,411 | 0,442 | 1 |
| Tlcd1     | 0,382588 | -0,00659 | 0,017 | 0,023 | 1 |
| 2010320M  | 0,38267  | -0,00161 | 0,074 | 0,086 | 1 |
| Cd27      | 0,382757 | 0,03971  | 0,055 | 0,046 | 1 |
| Steap3    | 0,382795 | 0,04098  | 0,155 | 0,14  | 1 |
| Dtd2      | 0,382802 | -0,03013 | 0,279 | 0,298 | 1 |
| Dctn3     | 0,383133 | -0,00789 | 0,857 | 0,886 | 1 |
| Stim1     | 0,383138 | -0,00855 | 0,573 | 0,593 | 1 |
| Nr2f6     | 0,383215 | -0,01497 | 0,158 | 0,174 | 1 |

|            |          |          |       |       |   |
|------------|----------|----------|-------|-------|---|
| Adpgk      | 0,383272 | -0,0102  | 0,217 | 0,237 | 1 |
| Rnf135     | 0,38329  | -0,01756 | 0,156 | 0,172 | 1 |
| Zbtb4      | 0,383324 | -0,02917 | 0,337 | 0,361 | 1 |
| Adar       | 0,383329 | -0,00799 | 0,167 | 0,185 | 1 |
| Dagla      | 0,383449 | 0,008765 | 0,013 | 0,008 | 1 |
| Rcor1      | 0,38345  | 0,019201 | 0,221 | 0,202 | 1 |
| Zfp52      | 0,383517 | 0,008436 | 0,019 | 0,013 | 1 |
| Nt5dc3     | 0,383518 | 0,026526 | 0,126 | 0,112 | 1 |
| Dusp6      | 0,383935 | 0,006516 | 0,013 | 0,008 | 1 |
| Spdl1      | 0,383935 | 0,007482 | 0,013 | 0,008 | 1 |
| Ezr        | 0,383935 | 0,007482 | 0,013 | 0,008 | 1 |
| Ttll4      | 0,383968 | -0,01657 | 0,129 | 0,143 | 1 |
| Gm48619    | 0,384081 | 0,007756 | 0,039 | 0,031 | 1 |
| Slc38a7    | 0,3841   | 0,015111 | 0,153 | 0,137 | 1 |
| Top2b      | 0,384144 | 0,038258 | 0,664 | 0,642 | 1 |
| Arhgdia    | 0,384195 | 0,033807 | 0,983 | 0,99  | 1 |
| Mog        | 0,384237 | -0,02403 | 0,997 | 1     | 1 |
| Papd5      | 0,384248 | -0,01217 | 0,305 | 0,328 | 1 |
| Ubap2      | 0,384387 | -0,0118  | 0,326 | 0,351 | 1 |
| Oraov1     | 0,384482 | 0,00043  | 0,212 | 0,236 | 1 |
| Trmt112    | 0,384567 | 0,024954 | 0,674 | 0,676 | 1 |
| Sh3gl2     | 0,384584 | -0,01514 | 0,131 | 0,146 | 1 |
| Tagln3     | 0,384674 | -0,00389 | 0,026 | 0,034 | 1 |
| Mark1      | 0,38468  | 0,013905 | 0,149 | 0,133 | 1 |
| 4930403P:  | 0,384721 | 0,008765 | 0,015 | 0,01  | 1 |
| Pdia5      | 0,384721 | 0,011651 | 0,015 | 0,01  | 1 |
| Adam9      | 0,38474  | 0,027091 | 0,553 | 0,548 | 1 |
| Denr       | 0,384743 | -0,02067 | 0,63  | 0,65  | 1 |
| Gm26799    | 0,384752 | 0,005548 | 0,013 | 0,008 | 1 |
| Sycp3      | 0,384752 | 0,005548 | 0,013 | 0,008 | 1 |
| Kcnmb4     | 0,384752 | 0,005548 | 0,013 | 0,008 | 1 |
| Itga2b     | 0,384752 | 0,005548 | 0,013 | 0,008 | 1 |
| Gm17586    | 0,384752 | 0,005548 | 0,013 | 0,008 | 1 |
| Gm40578    | 0,384752 | 0,005548 | 0,013 | 0,008 | 1 |
| Zrsr2      | 0,38476  | 0,030331 | 0,385 | 0,369 | 1 |
| Ccar2      | 0,384878 | -0,02104 | 0,253 | 0,272 | 1 |
| 1110035H:  | 0,384949 | 0,000819 | 0,024 | 0,031 | 1 |
| Wfikkn1    | 0,385027 | 0,010042 | 0,015 | 0,01  | 1 |
| AW146154   | 0,385119 | -0,01232 | 0,106 | 0,12  | 1 |
| Mrps9      | 0,385225 | -0,0126  | 0,329 | 0,354 | 1 |
| C1ql2      | 0,385477 | 0,013534 | 0,017 | 0,011 | 1 |
| D5Erttd579 | 0,385482 | -0,01499 | 0,664 | 0,685 | 1 |
| Fam160a1   | 0,38563  | 0,007801 | 0,015 | 0,01  | 1 |
| Ehbp111    | 0,38571  | 0,005553 | 0,023 | 0,016 | 1 |
| Gm14302    | 0,385931 | 0,008751 | 0,019 | 0,013 | 1 |
| Rnf20      | 0,385967 | -0,00823 | 0,642 | 0,662 | 1 |
| BC043934   | 0,386066 | 0,006832 | 0,019 | 0,013 | 1 |
| Fbxo4      | 0,386183 | -0,01103 | 0,141 | 0,158 | 1 |
| Chchd3     | 0,386242 | -0,01394 | 0,493 | 0,517 | 1 |
| Ttll11     | 0,386464 | 0,007156 | 0,017 | 0,011 | 1 |
| Usp6nl     | 0,386725 | -0,01533 | 0,305 | 0,328 | 1 |
| A330035P:  | 0,386885 | 0,003937 | 0,013 | 0,008 | 1 |



|           |          |          |       |       |   |
|-----------|----------|----------|-------|-------|---|
| Tmem5     | 0,386949 | -0,01894 | 0,694 | 0,728 | 1 |
| Frg1      | 0,387013 | 0,029749 | 0,543 | 0,535 | 1 |
| Galk1     | 0,387079 | 0,040876 | 0,424 | 0,418 | 1 |
| Rpl18a    | 0,387086 | 0,025179 | 0,997 | 1     | 1 |
| Pthr1     | 0,387139 | 0,005871 | 0,019 | 0,013 | 1 |
| Vezt      | 0,387142 | 0,038101 | 0,381 | 0,366 | 1 |
| Agfg1     | 0,387281 | -0,03015 | 0,534 | 0,538 | 1 |
| Gm46404   | 0,387284 | 0,010835 | 0,048 | 0,039 | 1 |
| Kpna4     | 0,387313 | 0,023526 | 0,572 | 0,558 | 1 |
| Gm4316    | 0,387459 | 0,007156 | 0,017 | 0,011 | 1 |
| Gm26810   | 0,387459 | 0,006192 | 0,017 | 0,011 | 1 |
| Hdac9     | 0,387497 | 0,015432 | 0,106 | 0,093 | 1 |
| Txnrd3    | 0,38756  | 0,018179 | 0,055 | 0,046 | 1 |
| Fxr2      | 0,387595 | 0,022387 | 0,656 | 0,649 | 1 |
| D10Jhu81e | 0,387667 | -0,01821 | 0,419 | 0,444 | 1 |
| Akr1e1    | 0,387682 | 0,016747 | 0,127 | 0,112 | 1 |
| Gm14426   | 0,387705 | 0,002968 | 0,013 | 0,008 | 1 |
| Ppp4c     | 0,387851 | -0,0075  | 0,429 | 0,457 | 1 |
| Tnrc6a    | 0,387876 | 0,004804 | 0,899 | 0,896 | 1 |
| Gtf3c2    | 0,387918 | -0,02648 | 0,503 | 0,522 | 1 |
| Hspa1a    | 0,388032 | -0,02316 | 0,428 | 0,402 | 1 |
| Per2      | 0,388067 | 0,007475 | 0,015 | 0,01  | 1 |
| 2310035C  | 0,388103 | 0,007382 | 0,485 | 0,447 | 1 |
| Dhx38     | 0,388154 | 0,035273 | 0,196 | 0,182 | 1 |
| Gm49201   | 0,388214 | 0,004909 | 0,019 | 0,013 | 1 |
| Gm15559   | 0,388231 | 0,002686 | 0,017 | 0,023 | 1 |
| Ddx28     | 0,388246 | -0,01008 | 0,07  | 0,081 | 1 |
| Ctdp1     | 0,388264 | -0,01161 | 0,119 | 0,133 | 1 |
| Zbtb43    | 0,388316 | -0,01799 | 0,205 | 0,224 | 1 |
| Rplp0     | 0,388409 | 0,032094 | 0,994 | 0,993 | 1 |
| Klhdc3    | 0,388415 | -0,01996 | 0,339 | 0,361 | 1 |
| Araf      | 0,388533 | -0,00977 | 0,704 | 0,728 | 1 |
| Mbip      | 0,388621 | 0,020979 | 0,325 | 0,302 | 1 |
| Rere      | 0,388643 | 0,014406 | 0,614 | 0,574 | 1 |
| Terf2     | 0,388715 | -0,02103 | 0,251 | 0,27  | 1 |
| Nudt22    | 0,388759 | -0,00828 | 0,147 | 0,164 | 1 |
| Fndc5     | 0,388828 | 0,005228 | 0,015 | 0,01  | 1 |
| Ccnf      | 0,389177 | 0,003946 | 0,017 | 0,011 | 1 |
| Grtp1     | 0,389291 | 0,003946 | 0,019 | 0,013 | 1 |
| Aasdh     | 0,389322 | -0,01654 | 0,121 | 0,135 | 1 |
| Abcg1     | 0,389485 | 0,014102 | 0,861 | 0,862 | 1 |
| Tom34     | 0,389671 | 0,046047 | 0,439 | 0,436 | 1 |
| Crebrf    | 0,389881 | 0,051719 | 0,735 | 0,753 | 1 |
| Dync2h1   | 0,389975 | 0,018494 | 0,184 | 0,167 | 1 |
| Zdhhc4    | 0,389986 | -0,02078 | 0,235 | 0,254 | 1 |
| Nutf2-ps1 | 0,390038 | 0,005871 | 0,017 | 0,011 | 1 |
| Hspa13    | 0,390273 | -0,02641 | 0,393 | 0,41  | 1 |
| Taok2     | 0,390591 | 0,04142  | 0,389 | 0,376 | 1 |
| Hbp1      | 0,3906   | 0,037028 | 0,609 | 0,595 | 1 |
| Eif2b5    | 0,390642 | 0,028072 | 0,36  | 0,341 | 1 |
| Spryd4    | 0,390717 | -0,01454 | 0,075 | 0,086 | 1 |
| 4931414P  | 0,390755 | 0,010291 | 0,035 | 0,028 | 1 |

|           |          |          |       |       |   |
|-----------|----------|----------|-------|-------|---|
| Yipf6     | 0,390805 | -0,00527 | 0,391 | 0,42  | 1 |
| Gorasp2   | 0,390894 | 0,001093 | 0,468 | 0,506 | 1 |
| Helz      | 0,39092  | 0,014652 | 0,122 | 0,107 | 1 |
| Lss       | 0,390996 | 0,088053 | 0,354 | 0,348 | 1 |
| Msh2      | 0,391107 | -0,02593 | 0,207 | 0,223 | 1 |
| Cox6b1    | 0,391147 | -0,01619 | 0,978 | 0,977 | 1 |
| Maged1    | 0,39123  | -0,02838 | 0,624 | 0,628 | 1 |
| Rad23a    | 0,391234 | -0,01416 | 0,658 | 0,686 | 1 |
| Naaa      | 0,39154  | 0,010491 | 0,108 | 0,094 | 1 |
| Susd6     | 0,391823 | -0,02003 | 0,349 | 0,366 | 1 |
| Pik3ca    | 0,391883 | 0,007191 | 0,43  | 0,465 | 1 |
| Kif13b    | 0,391892 | -0,0399  | 0,906 | 0,92  | 1 |
| Metap1d   | 0,392097 | -0,00738 | 0,42  | 0,454 | 1 |
| A230009B: | 0,392146 | -0,02037 | 0,306 | 0,325 | 1 |
| Tctex1d2  | 0,392605 | 0,015425 | 0,197 | 0,18  | 1 |
| Rnf4      | 0,39272  | 0,030179 | 0,415 | 0,407 | 1 |
| Tigd5     | 0,392822 | 0,009963 | 0,035 | 0,028 | 1 |
| Rab2a     | 0,392825 | 0,028465 | 0,964 | 0,956 | 1 |
| Foxj2     | 0,392885 | -0,009   | 0,338 | 0,366 | 1 |
| Ftl1      | 0,393175 | 0,047384 | 1     | 0,998 | 1 |
| Sec24b    | 0,39346  | -0,00631 | 0,349 | 0,379 | 1 |
| 1110065P: | 0,393951 | -0,01464 | 0,576 | 0,597 | 1 |
| Nxpe4     | 0,394165 | -0,00309 | 0,107 | 0,122 | 1 |
| Ehmt2     | 0,394169 | 0,052836 | 0,401 | 0,397 | 1 |
| Psmb6     | 0,394285 | -0,01776 | 0,953 | 0,958 | 1 |
| Cyp39a1   | 0,394333 | -0,01663 | 0,152 | 0,167 | 1 |
| Tmem9b    | 0,394458 | -0,0199  | 0,849 | 0,85  | 1 |
| Zdhhc1    | 0,394464 | -0,00239 | 0,157 | 0,176 | 1 |
| Pnpt1     | 0,394464 | -0,03006 | 0,18  | 0,193 | 1 |
| Fxyd3     | 0,394807 | 0,00069  | 0,065 | 0,054 | 1 |
| Pars2     | 0,394933 | -0,00246 | 0,047 | 0,057 | 1 |
| Engase    | 0,395006 | -0,00409 | 0,038 | 0,047 | 1 |
| Skap2     | 0,395014 | -0,01876 | 0,631 | 0,659 | 1 |
| Col23a1   | 0,395219 | -0,0239  | 0,013 | 0,018 | 1 |
| Sfswap    | 0,395229 | 0,014673 | 0,57  | 0,533 | 1 |
| Ncln      | 0,395261 | 0,0325   | 0,524 | 0,512 | 1 |
| Comt      | 0,395475 | 0,042234 | 0,751 | 0,769 | 1 |
| Fbxo27    | 0,396125 | 0,000913 | 0,041 | 0,05  | 1 |
| Usp36     | 0,396353 | 0,030005 | 0,244 | 0,228 | 1 |
| Swt1      | 0,396368 | -0,03965 | 0,539 | 0,564 | 1 |
| Smarca1   | 0,396379 | 0,022789 | 0,031 | 0,024 | 1 |
| Chmp4b    | 0,396753 | 0,033796 | 0,905 | 0,912 | 1 |
| Thyn1     | 0,396824 | -0,00359 | 0,316 | 0,34  | 1 |
| Tsta3     | 0,396857 | -0,01782 | 0,238 | 0,257 | 1 |
| Pcdhb11   | 0,396888 | 0,015305 | 0,033 | 0,026 | 1 |
| Gnaq      | 0,396894 | -0,01676 | 0,787 | 0,793 | 1 |
| Letmd1    | 0,397033 | -0,01602 | 0,331 | 0,348 | 1 |
| Tapbp     | 0,397072 | -0,1346  | 0,332 | 0,343 | 1 |
| Pex11g    | 0,397113 | 0,011386 | 0,066 | 0,055 | 1 |
| Mvb12a    | 0,397163 | -0,01094 | 0,467 | 0,506 | 1 |
| Kdelr1    | 0,397235 | 0,027745 | 0,632 | 0,633 | 1 |
| Stam      | 0,397277 | -0,02794 | 0,501 | 0,517 | 1 |

|           |          |          |       |       |   |
|-----------|----------|----------|-------|-------|---|
| Sesn3     | 0,397324 | -0,00331 | 0,335 | 0,359 | 1 |
| Gm20045   | 0,397345 | -0,01271 | 0,088 | 0,101 | 1 |
| Zdhhc21   | 0,397558 | -0,03202 | 0,305 | 0,322 | 1 |
| Ptpn2     | 0,397897 | -0,01377 | 0,143 | 0,159 | 1 |
| Fopnl     | 0,397927 | -0,02325 | 0,504 | 0,537 | 1 |
| Chd3      | 0,398018 | 0,007444 | 0,035 | 0,028 | 1 |
| Wdr5b     | 0,398058 | 0,013731 | 0,073 | 0,062 | 1 |
| Plxna4    | 0,398081 | 0,017891 | 0,044 | 0,036 | 1 |
| Crcp      | 0,398101 | -0,01654 | 0,195 | 0,213 | 1 |
| Gnas      | 0,398165 | -0,0165  | 0,995 | 0,992 | 1 |
| Cd151     | 0,398207 | 0,008194 | 0,19  | 0,172 | 1 |
| Ppp3r1    | 0,398459 | -0,00144 | 0,395 | 0,428 | 1 |
| Smpd1     | 0,398904 | -0,02069 | 0,64  | 0,685 | 1 |
| Gm14326   | 0,398944 | -0,0124  | 0,105 | 0,119 | 1 |
| Zdhhc6    | 0,399016 | -0,02833 | 0,224 | 0,239 | 1 |
| Zfp59     | 0,399087 | 0,010905 | 0,035 | 0,028 | 1 |
| Arhgef11  | 0,399106 | -0,01321 | 0,182 | 0,198 | 1 |
| Asnsd1    | 0,399204 | -0,00925 | 0,205 | 0,224 | 1 |
| Pde6d     | 0,399284 | -0,01337 | 0,732 | 0,764 | 1 |
| Tmem243   | 0,399787 | -0,01461 | 0,447 | 0,473 | 1 |
| Diras1    | 0,399882 | -0,03763 | 0,225 | 0,241 | 1 |
| Lrriq3    | 0,399945 | -0,00145 | 0,02  | 0,026 | 1 |
| Hist2h3c1 | 0,400136 | -0,00813 | 0,08  | 0,093 | 1 |
| Gm44175   | 0,400282 | -0,01142 | 0,013 | 0,018 | 1 |
| Crlf2     | 0,400419 | 0,011236 | 0,033 | 0,026 | 1 |
| Sin3a     | 0,400471 | -0,01619 | 0,244 | 0,262 | 1 |
| Capns1    | 0,400601 | 0,0198   | 0,979 | 0,977 | 1 |
| Dnaic2    | 0,400951 | 0,011736 | 0,055 | 0,046 | 1 |
| Stk11     | 0,400998 | 0,036744 | 0,513 | 0,506 | 1 |
| Gm4737    | 0,401012 | 0,011437 | 0,055 | 0,046 | 1 |
| Gm14443   | 0,401082 | -0,00681 | 0,023 | 0,029 | 1 |
| Sdf4      | 0,401204 | 0,027917 | 0,882 | 0,883 | 1 |
| Sh3bgrl2  | 0,401231 | 0,01476  | 0,093 | 0,081 | 1 |
| Ttyh1     | 0,401366 | 0,016629 | 0,319 | 0,301 | 1 |
| Zmat3     | 0,40142  | 0,027594 | 0,222 | 0,207 | 1 |
| Mrpl13    | 0,401478 | -0,01134 | 0,433 | 0,468 | 1 |
| Dhrs1     | 0,401571 | -0,02826 | 0,586 | 0,59  | 1 |
| A330015K  | 0,401718 | -0,0279  | 0,418 | 0,441 | 1 |
| Mysm1     | 0,401757 | -0,00752 | 0,59  | 0,629 | 1 |
| Bri3      | 0,401774 | -0,01648 | 0,89  | 0,888 | 1 |
| Galns     | 0,402235 | 0,023506 | 0,067 | 0,057 | 1 |
| Tbce      | 0,402338 | -0,00206 | 0,316 | 0,346 | 1 |
| Hax1      | 0,402469 | -0,00818 | 0,434 | 0,462 | 1 |
| Rbpms     | 0,40248  | -0,00859 | 0,026 | 0,033 | 1 |
| Irak2     | 0,402545 | -0,01256 | 0,069 | 0,08  | 1 |
| Frs2      | 0,402701 | 0,019887 | 0,3   | 0,283 | 1 |
| Atp23     | 0,402768 | -0,00742 | 0,023 | 0,029 | 1 |
| Capn5     | 0,402899 | -0,01684 | 0,279 | 0,302 | 1 |
| Thap11    | 0,403229 | -0,00462 | 0,272 | 0,294 | 1 |
| Nom1      | 0,403273 | -0,02515 | 0,251 | 0,27  | 1 |
| Rab40c    | 0,403664 | 0,019911 | 0,497 | 0,478 | 1 |
| Gm43713   | 0,403764 | 0,015998 | 0,177 | 0,161 | 1 |

|           |          |          |       |       |   |
|-----------|----------|----------|-------|-------|---|
| Gpr158    | 0,403774 | -0,01188 | 0,037 | 0,046 | 1 |
| Atp13a3   | 0,4038   | 0,011556 | 0,318 | 0,296 | 1 |
| Trmt13    | 0,40388  | -0,02623 | 0,384 | 0,411 | 1 |
| Stk36     | 0,403928 | -0,00471 | 0,013 | 0,018 | 1 |
| Gpam      | 0,403954 | 0,010555 | 0,044 | 0,036 | 1 |
| Col9a2    | 0,403989 | -0,0022  | 0,079 | 0,091 | 1 |
| 1700034P: | 0,40407  | -0,00505 | 0,013 | 0,018 | 1 |
| Dazap1    | 0,404092 | 0,007604 | 0,565 | 0,525 | 1 |
| Odf2l     | 0,404122 | -0,01459 | 0,203 | 0,221 | 1 |
| Echdc1    | 0,404608 | 0,021089 | 0,372 | 0,353 | 1 |
| Nsrp1     | 0,404694 | 0,046827 | 0,373 | 0,363 | 1 |
| Cep104    | 0,404697 | -0,00824 | 0,359 | 0,382 | 1 |
| Aspscr1   | 0,404728 | -0,00791 | 0,408 | 0,439 | 1 |
| Klhl21    | 0,404865 | -0,01176 | 0,107 | 0,12  | 1 |
| Polr3g    | 0,404988 | -0,00908 | 0,11  | 0,124 | 1 |
| Txnrd1    | 0,405253 | -0,03122 | 0,376 | 0,398 | 1 |
| Cited2    | 0,405334 | 0,013731 | 0,064 | 0,054 | 1 |
| Tro       | 0,405578 | -0,00428 | 0,023 | 0,029 | 1 |
| Fastkd5   | 0,405652 | -0,00961 | 0,026 | 0,033 | 1 |
| Nadsyn1   | 0,40567  | -0,01214 | 0,04  | 0,049 | 1 |
| Med23     | 0,405676 | -0,01714 | 0,179 | 0,195 | 1 |
| 2310047Dl | 0,405684 | -0,00408 | 0,013 | 0,018 | 1 |
| Bola2     | 0,405842 | -0,00609 | 0,71  | 0,722 | 1 |
| Jmjd6     | 0,406236 | 0,032518 | 0,436 | 0,423 | 1 |
| Fchsd1    | 0,406349 | -0,00893 | 0,028 | 0,036 | 1 |
| Cpeb4     | 0,406532 | -0,01678 | 0,712 | 0,748 | 1 |
| Car11     | 0,406586 | -0,01478 | 0,194 | 0,211 | 1 |
| Xpo6      | 0,406609 | -0,02821 | 0,346 | 0,363 | 1 |
| Gm49336   | 0,406676 | -0,00363 | 0,258 | 0,281 | 1 |
| Zfp934    | 0,406783 | -0,02256 | 0,156 | 0,171 | 1 |
| Wdr62     | 0,40701  | -0,00374 | 0,013 | 0,018 | 1 |
| Rnaset2b  | 0,407178 | 0,019135 | 0,144 | 0,13  | 1 |
| Cyth1     | 0,407258 | -0,01571 | 0,863 | 0,865 | 1 |
| Cltc      | 0,407381 | 0,022337 | 0,94  | 0,943 | 1 |
| Zbtb12    | 0,407396 | 0,023258 | 0,153 | 0,14  | 1 |
| Dda1      | 0,40751  | 0,020055 | 0,589 | 0,571 | 1 |
| Snrpf     | 0,4076   | 0,028816 | 0,773 | 0,79  | 1 |
| Rnf34     | 0,407638 | 0,007756 | 0,394 | 0,429 | 1 |
| Gsto2     | 0,407802 | 0,025417 | 0,125 | 0,112 | 1 |
| Dpp8      | 0,408034 | -0,00318 | 0,44  | 0,478 | 1 |
| Lsm2      | 0,408054 | -0,00331 | 0,269 | 0,293 | 1 |
| Nim1k     | 0,408166 | 0,025307 | 0,042 | 0,034 | 1 |
| Rab11fip4 | 0,408298 | 0,030429 | 0,498 | 0,486 | 1 |
| Hnrnp     | 0,408703 | 0,031759 | 0,816 | 0,782 | 1 |
| Scaf1     | 0,408722 | 0,032165 | 0,554 | 0,537 | 1 |
| Tex264    | 0,409152 | 0,024804 | 0,575 | 0,554 | 1 |
| Klhl5     | 0,409311 | 0,013839 | 0,189 | 0,172 | 1 |
| Irak3     | 0,409634 | 0,021789 | 0,127 | 0,114 | 1 |
| Rep15     | 0,409669 | 0,009297 | 0,044 | 0,036 | 1 |
| Kifap3    | 0,409686 | 0,03729  | 0,713 | 0,709 | 1 |
| Clpp      | 0,40996  | -0,01133 | 0,581 | 0,598 | 1 |
| Nme3      | 0,409965 | -0,00697 | 0,08  | 0,093 | 1 |

|           |          |          |       |       |   |
|-----------|----------|----------|-------|-------|---|
| Cenpq     | 0,410014 | -0,02532 | 0,145 | 0,159 | 1 |
| Nsun5     | 0,410465 | -0,00791 | 0,13  | 0,145 | 1 |
| Edf1      | 0,410556 | 0,025883 | 0,874 | 0,854 | 1 |
| Nmnat3    | 0,410628 | -0,01627 | 0,074 | 0,085 | 1 |
| Sra1      | 0,410675 | -0,0144  | 0,625 | 0,628 | 1 |
| Xbp1      | 0,41069  | -0,02449 | 0,564 | 0,582 | 1 |
| Rbm6      | 0,410712 | 0,0308   | 0,525 | 0,504 | 1 |
| Bag6      | 0,410728 | 0,021138 | 0,658 | 0,652 | 1 |
| Gm45184   | 0,410887 | -0,00764 | 0,031 | 0,039 | 1 |
| Atp6v0e2  | 0,410901 | -0,00795 | 0,869 | 0,902 | 1 |
| Rpf1      | 0,410977 | -0,02013 | 0,209 | 0,224 | 1 |
| Arf4      | 0,411077 | -0,00462 | 0,733 | 0,764 | 1 |
| Tssc4     | 0,411125 | -0,00513 | 0,334 | 0,359 | 1 |
| Mettl18   | 0,411366 | -0,00954 | 0,031 | 0,039 | 1 |
| Hoxd8     | 0,411572 | 0,026705 | 0,693 | 0,681 | 1 |
| Epg5      | 0,411584 | 0,002666 | 0,177 | 0,197 | 1 |
| Emg1      | 0,41171  | -0,01667 | 0,43  | 0,455 | 1 |
| Gcc1      | 0,411921 | 0,010081 | 0,13  | 0,146 | 1 |
| Ccdc24    | 0,411953 | 0,014463 | 0,06  | 0,05  | 1 |
| Tmem62    | 0,4121   | -0,01365 | 0,379 | 0,407 | 1 |
| Reep5     | 0,41221  | -0,00828 | 0,967 | 0,956 | 1 |
| Sirt5     | 0,412295 | 0,02198  | 0,135 | 0,122 | 1 |
| Mtx3      | 0,412398 | -0,00735 | 0,164 | 0,18  | 1 |
| Mocs3     | 0,412498 | -0,01077 | 0,134 | 0,15  | 1 |
| Dgat1     | 0,412525 | 0,024652 | 0,206 | 0,192 | 1 |
| Pik3ip1   | 0,412551 | -0,01333 | 0,677 | 0,704 | 1 |
| Dennd2a   | 0,413085 | -0,01098 | 0,189 | 0,207 | 1 |
| G6pdx     | 0,413095 | -0,04733 | 0,376 | 0,389 | 1 |
| 1500011K: | 0,413149 | -0,02332 | 0,498 | 0,509 | 1 |
| Nelfb     | 0,413234 | -0,00415 | 0,392 | 0,42  | 1 |
| Alkbh7    | 0,413268 | -0,02103 | 0,267 | 0,285 | 1 |
| Rpl37a    | 0,413322 | 0,028371 | 0,996 | 0,998 | 1 |
| Pdia6     | 0,413478 | -0,01859 | 0,75  | 0,763 | 1 |
| Slc29a2   | 0,413498 | -0,00641 | 0,028 | 0,036 | 1 |
| Gm12758   | 0,413609 | 0,00743  | 0,044 | 0,036 | 1 |
| Efcab2    | 0,413642 | -0,01497 | 0,139 | 0,154 | 1 |
| Dhx15     | 0,413665 | 0,034042 | 0,528 | 0,517 | 1 |
| Camk2b    | 0,413793 | -0,0101  | 0,016 | 0,021 | 1 |
| Ap2s1     | 0,413837 | 0,024656 | 0,86  | 0,833 | 1 |
| Syt6      | 0,414071 | 0,010083 | 0,004 | 0,002 | 1 |
| Rrn3      | 0,414145 | 0,005871 | 0,343 | 0,369 | 1 |
| Sipa1l1   | 0,414186 | 0,007075 | 0,073 | 0,062 | 1 |
| Gtf2f1    | 0,414286 | -0,01973 | 0,479 | 0,498 | 1 |
| Sbno1     | 0,414378 | 0,048142 | 0,778 | 0,793 | 1 |
| Reln      | 0,414394 | 0,010083 | 0,004 | 0,002 | 1 |
| BC052040  | 0,414422 | -0,01703 | 0,111 | 0,124 | 1 |
| Nr4a1     | 0,414521 | 0,064926 | 0,129 | 0,117 | 1 |
| Bnip1     | 0,414607 | -0,00562 | 0,134 | 0,15  | 1 |
| Vash2     | 0,414718 | 0,004246 | 0,004 | 0,002 | 1 |
| Stpg4     | 0,414718 | 0,004246 | 0,004 | 0,002 | 1 |
| D030040B: | 0,414718 | 0,005221 | 0,004 | 0,002 | 1 |
| Tmem82    | 0,414718 | 0,005221 | 0,004 | 0,002 | 1 |

|            |          |          |       |       |   |
|------------|----------|----------|-------|-------|---|
| Slc25a2    | 0,414718 | 0,005221 | 0,004 | 0,002 | 1 |
| Xrcc2      | 0,414891 | -0,00932 | 0,11  | 0,124 | 1 |
| Pde7a      | 0,41499  | 0,028733 | 0,234 | 0,218 | 1 |
| Cited1     | 0,415041 | 0,005221 | 0,004 | 0,002 | 1 |
| Tgfb2      | 0,415041 | 0,005221 | 0,004 | 0,002 | 1 |
| Gm15938    | 0,415041 | 0,004246 | 0,004 | 0,002 | 1 |
| Sardh      | 0,415041 | 0,00327  | 0,004 | 0,002 | 1 |
| 4930502E1  | 0,415041 | 0,00327  | 0,004 | 0,002 | 1 |
| Smim10l2a  | 0,415041 | 0,00327  | 0,004 | 0,002 | 1 |
| Fgf13      | 0,415041 | 0,00327  | 0,004 | 0,002 | 1 |
| Gm2464.1   | 0,415041 | 0,00327  | 0,004 | 0,002 | 1 |
| Pcdh18     | 0,415041 | 0,00327  | 0,004 | 0,002 | 1 |
| Gm27022    | 0,415041 | 0,00327  | 0,004 | 0,002 | 1 |
| Sh2d5      | 0,415041 | 0,00327  | 0,004 | 0,002 | 1 |
| Tspan33    | 0,415041 | 0,00327  | 0,004 | 0,002 | 1 |
| 1700040LC  | 0,415041 | 0,00327  | 0,004 | 0,002 | 1 |
| Vmn1r46    | 0,415041 | 0,00327  | 0,004 | 0,002 | 1 |
| Prrt3      | 0,415041 | 0,00327  | 0,004 | 0,002 | 1 |
| Slc8a2     | 0,415041 | 0,00327  | 0,004 | 0,002 | 1 |
| Gm39228    | 0,415041 | 0,00327  | 0,004 | 0,002 | 1 |
| Gm26536    | 0,415041 | 0,00327  | 0,004 | 0,002 | 1 |
| Lrrc2      | 0,415041 | 0,00327  | 0,004 | 0,002 | 1 |
| Tcte3      | 0,415041 | 0,00327  | 0,004 | 0,002 | 1 |
| lkbkb      | 0,415106 | -0,01504 | 0,371 | 0,389 | 1 |
| Fzd10      | 0,415215 | -0,00963 | 0,005 | 0,008 | 1 |
| 5730559C:  | 0,415215 | -0,01283 | 0,005 | 0,008 | 1 |
| Nrtn       | 0,415271 | -0,02262 | 0,144 | 0,159 | 1 |
| Rad51b     | 0,415361 | -0,00696 | 0,037 | 0,046 | 1 |
| Gm37988    | 0,415365 | 0,002293 | 0,004 | 0,002 | 1 |
| Speg       | 0,415365 | 0,002293 | 0,004 | 0,002 | 1 |
| Stkld1     | 0,415365 | 0,002293 | 0,004 | 0,002 | 1 |
| Klhl41     | 0,415365 | 0,002293 | 0,004 | 0,002 | 1 |
| Olfr1310   | 0,415365 | 0,002293 | 0,004 | 0,002 | 1 |
| Gm13963    | 0,415365 | 0,002293 | 0,004 | 0,002 | 1 |
| Kif16bos   | 0,415365 | 0,002293 | 0,004 | 0,002 | 1 |
| Mageb16    | 0,415365 | 0,002293 | 0,004 | 0,002 | 1 |
| Gm37933    | 0,415365 | 0,002293 | 0,004 | 0,002 | 1 |
| Dcst2      | 0,415365 | 0,002293 | 0,004 | 0,002 | 1 |
| Gm42681    | 0,415365 | 0,002293 | 0,004 | 0,002 | 1 |
| I830077J0: | 0,415365 | 0,002293 | 0,004 | 0,002 | 1 |
| Dennd2d    | 0,415365 | 0,002293 | 0,004 | 0,002 | 1 |
| Gm43240    | 0,415365 | 0,002293 | 0,004 | 0,002 | 1 |
| Triqk      | 0,415365 | 0,002293 | 0,004 | 0,002 | 1 |
| Aqp7       | 0,415365 | 0,002293 | 0,004 | 0,002 | 1 |
| Zkscan16   | 0,415365 | 0,002293 | 0,004 | 0,002 | 1 |
| Gm12932    | 0,415365 | 0,002293 | 0,004 | 0,002 | 1 |
| Angptl7    | 0,415365 | 0,002293 | 0,004 | 0,002 | 1 |
| 4632411P(  | 0,415365 | 0,002293 | 0,004 | 0,002 | 1 |
| Gm35911    | 0,415365 | 0,002293 | 0,004 | 0,002 | 1 |
| Gm20594    | 0,415365 | 0,002293 | 0,004 | 0,002 | 1 |
| Vmn1r58    | 0,415365 | 0,002293 | 0,004 | 0,002 | 1 |
| Igflr1     | 0,415365 | 0,002293 | 0,004 | 0,002 | 1 |

|           |          |          |       |       |   |
|-----------|----------|----------|-------|-------|---|
| Upk1a     | 0,415365 | 0,002293 | 0,004 | 0,002 | 1 |
| Rsf1os2   | 0,415365 | 0,002293 | 0,004 | 0,002 | 1 |
| Olfir624  | 0,415365 | 0,002293 | 0,004 | 0,002 | 1 |
| Gm10778   | 0,415365 | 0,002293 | 0,004 | 0,002 | 1 |
| Gm31182   | 0,415365 | 0,002293 | 0,004 | 0,002 | 1 |
| Ptger1    | 0,415365 | 0,002293 | 0,004 | 0,002 | 1 |
| Zfp791    | 0,415365 | 0,002293 | 0,004 | 0,002 | 1 |
| Gm10248   | 0,415365 | 0,002293 | 0,004 | 0,002 | 1 |
| Rnf17     | 0,415365 | 0,002293 | 0,004 | 0,002 | 1 |
| Panx1     | 0,415365 | 0,002293 | 0,004 | 0,002 | 1 |
| Gm38431   | 0,415365 | 0,002293 | 0,004 | 0,002 | 1 |
| Gm36799   | 0,415365 | 0,002293 | 0,004 | 0,002 | 1 |
| Pstpip1   | 0,415365 | 0,002293 | 0,004 | 0,002 | 1 |
| Gm47409   | 0,415365 | 0,002293 | 0,004 | 0,002 | 1 |
| 1700065D  | 0,415365 | 0,002293 | 0,004 | 0,002 | 1 |
| 9630041A  | 0,415365 | 0,002293 | 0,004 | 0,002 | 1 |
| Eme1      | 0,415365 | 0,002293 | 0,004 | 0,002 | 1 |
| Omd       | 0,415365 | 0,002293 | 0,004 | 0,002 | 1 |
| 2410018L1 | 0,415365 | 0,002293 | 0,004 | 0,002 | 1 |
| Gm15943   | 0,415365 | 0,002293 | 0,004 | 0,002 | 1 |
| AC126280  | 0,415365 | 0,002293 | 0,004 | 0,002 | 1 |
| Def6      | 0,415365 | 0,002293 | 0,004 | 0,002 | 1 |
| St8sia3os | 0,415365 | 0,002293 | 0,004 | 0,002 | 1 |
| Gm10053   | 0,415365 | 0,002293 | 0,004 | 0,002 | 1 |
| Plce1     | 0,415365 | 0,002293 | 0,004 | 0,002 | 1 |
| Mycbp     | 0,415392 | -0,00572 | 0,17  | 0,187 | 1 |
| Gsdme     | 0,415404 | -0,00669 | 0,031 | 0,039 | 1 |
| Trp53bp1  | 0,41543  | -0,01227 | 0,222 | 0,242 | 1 |
| Ddx50     | 0,415442 | 0,021024 | 0,574 | 0,561 | 1 |
| Gm21781   | 0,415488 | -0,0069  | 0,037 | 0,046 | 1 |
| Aph1b     | 0,415724 | -0,02022 | 0,218 | 0,236 | 1 |
| Nr1h2     | 0,415954 | 0,022626 | 0,574 | 0,567 | 1 |
| lqcb1     | 0,415976 | 0,013464 | 0,212 | 0,195 | 1 |
| Mllt10    | 0,416266 | -0,02001 | 0,374 | 0,395 | 1 |
| 0610039K  | 0,416338 | 0,001648 | 0,004 | 0,002 | 1 |
| Stk32b    | 0,416338 | 0,001648 | 0,004 | 0,002 | 1 |
| Eno1      | 0,416357 | 0,02776  | 0,598 | 0,584 | 1 |
| Lmo1      | 0,416362 | -0,00642 | 0,005 | 0,008 | 1 |
| Cd59b     | 0,416546 | -0,00665 | 0,069 | 0,08  | 1 |
| Mrpl27    | 0,416636 | 0,004759 | 0,491 | 0,532 | 1 |
| Actrt3    | 0,416662 | 0,000671 | 0,004 | 0,002 | 1 |
| 4930471M  | 0,416662 | 0,000671 | 0,004 | 0,002 | 1 |
| Pdlim4    | 0,416662 | 0,000671 | 0,004 | 0,002 | 1 |
| Mcidas    | 0,416662 | 0,000671 | 0,004 | 0,002 | 1 |
| Pcdha5    | 0,416662 | 0,000671 | 0,004 | 0,002 | 1 |
| Pyroxd2   | 0,416662 | 0,000671 | 0,004 | 0,002 | 1 |
| Fcr1s     | 0,416662 | 2,86E-05 | 0,004 | 0,002 | 1 |
| Abhd2     | 0,416776 | -0,00681 | 0,263 | 0,285 | 1 |
| Helb      | 0,416958 | 0,01966  | 0,106 | 0,094 | 1 |
| Racgap1   | 0,416997 | -0,00413 | 0,031 | 0,039 | 1 |
| Uba7      | 0,417282 | -0,01026 | 0,005 | 0,008 | 1 |
| Ap3s1     | 0,417305 | -0,00757 | 0,099 | 0,112 | 1 |

|          |          |          |       |       |   |
|----------|----------|----------|-------|-------|---|
| Plk2     | 0,417355 | -0,00871 | 0,06  | 0,07  | 1 |
| Fcrl6    | 0,417511 | -0,00481 | 0,005 | 0,008 | 1 |
| Gm30173  | 0,417511 | -0,00481 | 0,005 | 0,008 | 1 |
| Nudt17   | 0,417511 | -0,00481 | 0,005 | 0,008 | 1 |
| Ttc9b    | 0,417511 | -0,00481 | 0,005 | 0,008 | 1 |
| Polq     | 0,417511 | -0,00481 | 0,005 | 0,008 | 1 |
| Xlr4c    | 0,417511 | -0,00642 | 0,005 | 0,008 | 1 |
| Paip2b   | 0,417592 | 0,016433 | 0,421 | 0,462 | 1 |
| Atp1b1   | 0,417725 | -0,00755 | 0,016 | 0,021 | 1 |
| Shoc2    | 0,417738 | 0,00182  | 0,262 | 0,288 | 1 |
| Mpi      | 0,417818 | -0,00765 | 0,113 | 0,127 | 1 |
| Sap18b   | 0,417947 | 0,007459 | 0,029 | 0,023 | 1 |
| Rsrp1    | 0,41797  | -0,0088  | 0,998 | 0,998 | 1 |
| Mcm10    | 0,417973 | -0,00058 | 0,005 | 0,008 | 1 |
| Fgf12    | 0,417978 | -0,00898 | 0,066 | 0,076 | 1 |
| Usmg5    | 0,41826  | -0,01042 | 0,858 | 0,862 | 1 |
| Gzmm     | 0,418568 | 0,015994 | 0,027 | 0,021 | 1 |
| Lsm6     | 0,418598 | -0,02006 | 0,617 | 0,636 | 1 |
| Gm37756  | 0,418662 | -0,0032  | 0,005 | 0,008 | 1 |
| Slc12a5  | 0,418662 | -0,0032  | 0,005 | 0,008 | 1 |
| Gm43825  | 0,418662 | -0,0032  | 0,005 | 0,008 | 1 |
| 5730596B | 0,418662 | -0,0032  | 0,005 | 0,008 | 1 |
| Ttc23    | 0,418662 | -0,0032  | 0,005 | 0,008 | 1 |
| Pgghg    | 0,418662 | -0,0032  | 0,005 | 0,008 | 1 |
| 1810041H | 0,418662 | -0,0032  | 0,005 | 0,008 | 1 |
| Tmie     | 0,418662 | -0,0032  | 0,005 | 0,008 | 1 |
| Gm17334  | 0,418662 | -0,0032  | 0,005 | 0,008 | 1 |
| Gm33280  | 0,418663 | -0,00384 | 0,005 | 0,008 | 1 |
| Raver2   | 0,418663 | -0,00384 | 0,005 | 0,008 | 1 |
| Halr1    | 0,418664 | -0,00447 | 0,005 | 0,008 | 1 |
| Zfp764   | 0,418691 | 0,018407 | 0,058 | 0,049 | 1 |
| Tspan6   | 0,418699 | -0,0139  | 0,057 | 0,067 | 1 |
| Nf2      | 0,418826 | -0,01876 | 0,321 | 0,341 | 1 |
| Tctn1    | 0,418848 | 0,01762  | 0,08  | 0,07  | 1 |
| Bicral   | 0,418904 | 0,048487 | 0,335 | 0,324 | 1 |
| Ppfia1   | 0,418951 | 0,023545 | 0,288 | 0,27  | 1 |
| Fam83b   | 0,418965 | 0,006504 | 0,029 | 0,023 | 1 |
| Flad1    | 0,41904  | -0,00755 | 0,202 | 0,221 | 1 |
| Slc25a42 | 0,419123 | -0,01279 | 0,125 | 0,138 | 1 |
| Wnt3     | 0,419432 | -0,00224 | 0,363 | 0,392 | 1 |
| Foxo6    | 0,419538 | -0,01436 | 0,071 | 0,081 | 1 |
| Rnf169   | 0,419554 | -0,01158 | 0,16  | 0,176 | 1 |
| Slc25a26 | 0,419758 | -0,01705 | 0,111 | 0,124 | 1 |
| Gm17552  | 0,419765 | -0,01072 | 0,016 | 0,021 | 1 |
| Gm43062  | 0,419769 | -0,00562 | 0,016 | 0,021 | 1 |
| 4933424G | 0,419816 | -0,00223 | 0,005 | 0,008 | 1 |
| Gm28609  | 0,419817 | -0,00286 | 0,005 | 0,008 | 1 |
| Mcub     | 0,419817 | -0,00286 | 0,005 | 0,008 | 1 |
| Gm14827  | 0,420048 | 5,69E-05 | 0,005 | 0,008 | 1 |
| Fut9     | 0,420238 | -0,00192 | 0,046 | 0,055 | 1 |
| Xylt1    | 0,420352 | -0,00102 | 0,034 | 0,042 | 1 |
| Fbxo3    | 0,420353 | -0,0205  | 0,312 | 0,333 | 1 |



|            |          |          |       |       |   |
|------------|----------|----------|-------|-------|---|
| 1700084E1  | 0,420398 | -0,00476 | 0,009 | 0,013 | 1 |
| Sh3tc2     | 0,420449 | 0,023706 | 0,25  | 0,234 | 1 |
| Slc9a6     | 0,420482 | -0,01195 | 0,381 | 0,405 | 1 |
| Gm5093     | 0,420573 | -0,00413 | 0,009 | 0,013 | 1 |
| Gm26533    | 0,420573 | -0,00413 | 0,009 | 0,013 | 1 |
| Ddx25      | 0,420575 | -0,00282 | 0,009 | 0,013 | 1 |
| Rft1       | 0,420608 | 0,015275 | 0,214 | 0,197 | 1 |
| A230050P1  | 0,420971 | -0,00028 | 0,005 | 0,008 | 1 |
| Tkfc       | 0,421015 | -0,01381 | 0,119 | 0,132 | 1 |
| Taf3       | 0,421095 | -0,01163 | 0,377 | 0,4   | 1 |
| Tmem176b   | 0,421525 | 0,033712 | 0,131 | 0,117 | 1 |
| Gm28424    | 0,421545 | -0,00466 | 0,016 | 0,021 | 1 |
| Exosc7     | 0,421559 | -0,00792 | 0,319 | 0,343 | 1 |
| Agbl3      | 0,421604 | -0,02293 | 0,184 | 0,198 | 1 |
| Ascc3      | 0,421607 | 0,000107 | 0,424 | 0,455 | 1 |
| Gm47015    | 0,421667 | -0,00118 | 0,005 | 0,008 | 1 |
| Phyhd1     | 0,421678 | -0,005   | 0,016 | 0,021 | 1 |
| Rhbdf1     | 0,421678 | -0,005   | 0,016 | 0,021 | 1 |
| Ip6k2      | 0,421682 | 0,036663 | 0,356 | 0,341 | 1 |
| Cnppd1     | 0,421698 | 0,004454 | 0,407 | 0,446 | 1 |
| Camk2n2    | 0,421718 | -0,00527 | 0,066 | 0,076 | 1 |
| Ikkip      | 0,421874 | -0,00605 | 0,224 | 0,242 | 1 |
| Ndufaf8    | 0,421947 | 0,009134 | 0,406 | 0,449 | 1 |
| Rad1       | 0,421956 | 0,019518 | 0,251 | 0,233 | 1 |
| Reck       | 0,421973 | 0,005871 | 0,029 | 0,023 | 1 |
| Tspan13    | 0,421996 | -0,00219 | 0,009 | 0,013 | 1 |
| Krtcap3    | 0,421996 | -0,00316 | 0,009 | 0,013 | 1 |
| Gm48740    | 0,421996 | -0,00316 | 0,009 | 0,013 | 1 |
| E2f6       | 0,422059 | 0,025997 | 0,177 | 0,163 | 1 |
| 1190005I0  | 0,42208  | -0,01764 | 0,586 | 0,613 | 1 |
| Rasgrf1    | 0,422129 | 0,000696 | 0,005 | 0,008 | 1 |
| Ltbp4      | 0,422129 | 0,023917 | 0,038 | 0,031 | 1 |
| Coq4       | 0,422296 | -0,00478 | 0,181 | 0,198 | 1 |
| Cpne3      | 0,422352 | -0,00914 | 0,327 | 0,354 | 1 |
| Zhx1       | 0,422519 | 0,036697 | 0,43  | 0,415 | 1 |
| Mrpl19     | 0,422731 | -0,00429 | 0,284 | 0,307 | 1 |
| Eif3l      | 0,422755 | 0,025116 | 0,921 | 0,894 | 1 |
| 2310068J1  | 0,422835 | 0,018122 | 0,063 | 0,054 | 1 |
| Ssr4       | 0,422926 | -0,01288 | 0,766 | 0,78  | 1 |
| Znrd1as    | 0,423007 | -0,03139 | 0,096 | 0,107 | 1 |
| Nup85      | 0,42314  | -0,00969 | 0,212 | 0,229 | 1 |
| Ndrp4      | 0,423287 | 0,02628  | 0,106 | 0,094 | 1 |
| Scn8a      | 0,423294 | 0,018293 | 0,067 | 0,057 | 1 |
| Nrbp2      | 0,423318 | -0,00589 | 0,944 | 0,951 | 1 |
| Hist2h2bb  | 0,423425 | -0,00185 | 0,009 | 0,013 | 1 |
| E130307A1  | 0,423433 | -0,00202 | 0,244 | 0,263 | 1 |
| Synm       | 0,423434 | 0,034396 | 0,795 | 0,78  | 1 |
| St6galnac5 | 0,423775 | 0,006814 | 0,029 | 0,023 | 1 |
| Sox9       | 0,423783 | 0,000416 | 0,009 | 0,013 | 1 |
| Tmem33     | 0,423835 | -0,01231 | 0,893 | 0,891 | 1 |
| Gm15859    | 0,424453 | 0,01558  | 0,072 | 0,062 | 1 |
| Tsacc      | 0,424504 | -0,00755 | 0,082 | 0,094 | 1 |

|           |          |          |       |       |   |
|-----------|----------|----------|-------|-------|---|
| Rpl7      | 0,424557 | 0,01333  | 0,989 | 0,985 | 1 |
| Chtop     | 0,424696 | -0,01849 | 0,736 | 0,771 | 1 |
| Capn7     | 0,424743 | -0,02075 | 0,251 | 0,27  | 1 |
| Rad9b     | 0,424765 | -0,00271 | 0,111 | 0,125 | 1 |
| Gm17435   | 0,424767 | -0,01381 | 0,054 | 0,063 | 1 |
| Phf2      | 0,424781 | 0,027531 | 0,341 | 0,325 | 1 |
| C1qb      | 0,424789 | 0,008411 | 0,027 | 0,021 | 1 |
| BC055324  | 0,424852 | -0,00122 | 0,009 | 0,013 | 1 |
| 6530437J2 | 0,424852 | -0,00122 | 0,009 | 0,013 | 1 |
| Gm45352   | 0,424852 | -0,00122 | 0,009 | 0,013 | 1 |
| 1700041G  | 0,424853 | -0,00088 | 0,009 | 0,013 | 1 |
| Ppie      | 0,42486  | -0,00565 | 0,24  | 0,259 | 1 |
| Fcho2     | 0,424904 | 0,035301 | 0,788 | 0,779 | 1 |
| Ufsp1     | 0,425078 | -0,00833 | 0,087 | 0,099 | 1 |
| Ttc13     | 0,425235 | 0,03208  | 0,168 | 0,156 | 1 |
| Atp13a1   | 0,425559 | 0,013956 | 0,27  | 0,252 | 1 |
| Gm10220   | 0,42566  | 0,00014  | 0,016 | 0,021 | 1 |
| B4gat1    | 0,426045 | 0,028827 | 0,692 | 0,685 | 1 |
| B9d1      | 0,42614  | -0,02015 | 0,183 | 0,197 | 1 |
| Scyl1     | 0,4262   | -0,01305 | 0,316 | 0,337 | 1 |
| Pias1     | 0,426228 | -0,00442 | 0,31  | 0,338 | 1 |
| Prdx1     | 0,426407 | -0,01096 | 0,999 | 1     | 1 |
| Utp6      | 0,426453 | -0,00566 | 0,279 | 0,302 | 1 |
| Kdm4a     | 0,426641 | 0,042775 | 0,39  | 0,385 | 1 |
| Sbk1      | 0,426689 | -0,00712 | 0,164 | 0,18  | 1 |
| Mapk9     | 0,426904 | -0,00893 | 0,273 | 0,294 | 1 |
| Gm17146   | 0,426916 | 0,012547 | 0,026 | 0,02  | 1 |
| Ccdc107   | 0,42732  | -0,00379 | 0,125 | 0,14  | 1 |
| Med13     | 0,427363 | 0,043875 | 0,612 | 0,589 | 1 |
| Gm17259   | 0,427445 | -0,01091 | 0,068 | 0,078 | 1 |
| Ptprj     | 0,427654 | 0,010858 | 0,04  | 0,033 | 1 |
| Wrap73    | 0,428036 | 0,003859 | 0,239 | 0,263 | 1 |
| Tmed8     | 0,428147 | -0,01487 | 0,133 | 0,148 | 1 |
| Podxl2    | 0,428237 | -0,01022 | 0,079 | 0,091 | 1 |
| Exd2      | 0,428382 | -0,00577 | 0,35  | 0,377 | 1 |
| Vps54     | 0,428618 | -0,01464 | 0,215 | 0,233 | 1 |
| Pspc1     | 0,428688 | 0,024413 | 0,343 | 0,327 | 1 |
| Senp2     | 0,428695 | 0,020792 | 0,48  | 0,463 | 1 |
| Gm26798   | 0,428781 | -0,00246 | 0,043 | 0,052 | 1 |
| Pi4ka     | 0,429217 | -0,00279 | 0,43  | 0,46  | 1 |
| Mcat      | 0,42925  | -0,02008 | 0,149 | 0,163 | 1 |
| Zbtb33    | 0,429615 | -0,02412 | 0,213 | 0,226 | 1 |
| Efcab5    | 0,429752 | 0,001187 | 0,034 | 0,042 | 1 |
| Park7     | 0,429755 | 0,023882 | 0,959 | 0,925 | 1 |
| Pik3c3    | 0,429857 | -0,00577 | 0,376 | 0,4   | 1 |
| Htt       | 0,429881 | -0,00336 | 0,364 | 0,395 | 1 |
| Fbxo5     | 0,429936 | 0,021277 | 0,077 | 0,067 | 1 |
| Dmwd      | 0,429967 | -0,01297 | 0,593 | 0,616 | 1 |
| Sirt3     | 0,42997  | -0,0191  | 0,311 | 0,335 | 1 |
| Emc6      | 0,430181 | -0,02438 | 0,55  | 0,553 | 1 |
| Lemd3     | 0,430266 | 0,023047 | 0,241 | 0,226 | 1 |
| Snhg11    | 0,430288 | 0,071153 | 0,121 | 0,138 | 1 |

|           |          |          |       |       |   |
|-----------|----------|----------|-------|-------|---|
| Adprm     | 0,430388 | 0,012782 | 0,173 | 0,158 | 1 |
| Lin52     | 0,430423 | -0,01693 | 0,187 | 0,203 | 1 |
| U2af1l4   | 0,430504 | -0,00528 | 0,019 | 0,024 | 1 |
| Dcaf13    | 0,430701 | 0,008528 | 0,268 | 0,294 | 1 |
| Atpif1    | 0,430762 | 0,012889 | 0,721 | 0,698 | 1 |
| Tppp      | 0,431004 | -0,00994 | 0,987 | 0,972 | 1 |
| Slx4      | 0,43124  | -0,01096 | 0,106 | 0,119 | 1 |
| Slc9a1    | 0,431248 | 0,019709 | 0,184 | 0,169 | 1 |
| Cd300e    | 0,431263 | 0,008738 | 0,026 | 0,02  | 1 |
| 4833418Nl | 0,431393 | 0,010002 | 0,026 | 0,02  | 1 |
| Hgsnat    | 0,431414 | -0,01564 | 0,28  | 0,296 | 1 |
| Efcab7    | 0,431425 | 0,009329 | 0,038 | 0,031 | 1 |
| Timm44    | 0,431445 | -0,01729 | 0,437 | 0,463 | 1 |
| Tlk1      | 0,431477 | -0,01808 | 0,423 | 0,444 | 1 |
| Setmar    | 0,431614 | -0,00063 | 0,043 | 0,052 | 1 |
| Unc45a    | 0,43164  | -0,00583 | 0,212 | 0,231 | 1 |
| Adh5      | 0,43193  | -0,02934 | 0,842 | 0,862 | 1 |
| Gm12184   | 0,432039 | 0,009452 | 0,089 | 0,078 | 1 |
| Mthfr     | 0,432044 | -0,00687 | 0,019 | 0,024 | 1 |
| Arrdc2    | 0,432088 | 0,027803 | 0,397 | 0,384 | 1 |
| Gm38399   | 0,432301 | -0,00528 | 0,019 | 0,024 | 1 |
| Kars      | 0,432305 | -0,01128 | 0,383 | 0,408 | 1 |
| March6    | 0,432455 | -0,01056 | 0,399 | 0,423 | 1 |
| Prcc      | 0,432474 | 0,017303 | 0,206 | 0,19  | 1 |
| Nisch     | 0,432631 | 0,031471 | 0,927 | 0,93  | 1 |
| Rars2     | 0,43278  | -0,0084  | 0,139 | 0,154 | 1 |
| Ppp2r3d   | 0,432793 | 0,020631 | 0,273 | 0,257 | 1 |
| Rspry1    | 0,433075 | -0,01248 | 0,397 | 0,42  | 1 |
| Ran       | 0,433453 | 0,020648 | 0,878 | 0,855 | 1 |
| Lrp10     | 0,433878 | 0,028981 | 0,388 | 0,376 | 1 |
| Vipas39   | 0,433897 | 0,021193 | 0,301 | 0,285 | 1 |
| Yrdc      | 0,4339   | 0,003896 | 0,264 | 0,289 | 1 |
| Shmt2     | 0,433993 | -0,00759 | 0,175 | 0,192 | 1 |
| Slc25a30  | 0,434046 | 0,025596 | 0,197 | 0,184 | 1 |
| Ndufc1    | 0,434055 | -0,00334 | 0,859 | 0,88  | 1 |
| Ctps2     | 0,43408  | -0,02331 | 0,181 | 0,195 | 1 |
| Gm37494   | 0,434173 | -0,02992 | 0,509 | 0,514 | 1 |
| Fdxacb1   | 0,434362 | 0,003922 | 0,144 | 0,13  | 1 |
| 2700012l2 | 0,434428 | 0,007144 | 0,026 | 0,02  | 1 |
| Cox6c     | 0,434474 | -0,02356 | 0,991 | 0,995 | 1 |
| Pmpca     | 0,434568 | 0,00092  | 0,407 | 0,444 | 1 |
| Siva1     | 0,434581 | 0,026331 | 0,528 | 0,506 | 1 |
| Dcaf7     | 0,434958 | -0,00562 | 0,279 | 0,299 | 1 |
| Eif2ak2   | 0,435106 | -0,0157  | 0,039 | 0,047 | 1 |
| Pex10     | 0,435184 | -0,00305 | 0,113 | 0,127 | 1 |
| Tpcn1     | 0,435211 | 0,0308   | 0,272 | 0,259 | 1 |
| Arfgap2   | 0,435294 | -0,0188  | 0,695 | 0,702 | 1 |
| Stx1b     | 0,435455 | 0,042259 | 0,139 | 0,128 | 1 |
| Usp27x    | 0,435604 | 0,009313 | 0,038 | 0,031 | 1 |
| Qrich1    | 0,43577  | 0,005663 | 0,389 | 0,421 | 1 |
| Plpp6     | 0,435844 | -0,02031 | 0,125 | 0,137 | 1 |
| Zfp362    | 0,435881 | -0,01682 | 0,142 | 0,156 | 1 |

|           |          |          |       |       |   |
|-----------|----------|----------|-------|-------|---|
| Dirc2     | 0,435886 | -0,02671 | 0,526 | 0,546 | 1 |
| Ppox      | 0,435957 | -0,00169 | 0,169 | 0,187 | 1 |
| Naa40     | 0,436009 | -0,00761 | 0,136 | 0,151 | 1 |
| Phc3      | 0,436081 | -0,01401 | 0,614 | 0,659 | 1 |
| Fam192a   | 0,43619  | 0,028223 | 0,463 | 0,45  | 1 |
| Maoa      | 0,436243 | 0,031331 | 0,469 | 0,462 | 1 |
| Scamp2    | 0,436254 | 0,031557 | 0,647 | 0,637 | 1 |
| Smg5      | 0,436603 | -0,02243 | 0,341 | 0,358 | 1 |
| Gm34961   | 0,436676 | -0,00274 | 0,019 | 0,024 | 1 |
| Ctdsp1    | 0,436843 | 0,039258 | 0,423 | 0,416 | 1 |
| Smc2      | 0,43692  | 0,00906  | 0,221 | 0,242 | 1 |
| Nudt18    | 0,436932 | -0,01504 | 0,233 | 0,25  | 1 |
| Gm7967    | 0,437084 | 0,010286 | 0,04  | 0,049 | 1 |
| Zfp639    | 0,437168 | -0,0044  | 0,383 | 0,411 | 1 |
| Tsc22d2   | 0,437372 | 0,029128 | 0,464 | 0,446 | 1 |
| Fiz1      | 0,437444 | 0,023083 | 0,328 | 0,312 | 1 |
| Sugct     | 0,437479 | 0,005243 | 0,038 | 0,031 | 1 |
| Exosc8    | 0,437609 | 0,017339 | 0,293 | 0,278 | 1 |
| Alg14     | 0,437899 | -0,01733 | 0,334 | 0,353 | 1 |
| Rab11fip1 | 0,437979 | 0,005871 | 0,001 | 0     | 1 |
| Oxtr      | 0,437979 | 0,004895 | 0,001 | 0     | 1 |
| Eln       | 0,437979 | 0,003918 | 0,001 | 0     | 1 |
| Rcn3      | 0,437979 | 0,003918 | 0,001 | 0     | 1 |
| Lamb2     | 0,437979 | 0,003918 | 0,001 | 0     | 1 |
| Chrm1     | 0,437979 | 0,003918 | 0,001 | 0     | 1 |
| Prrg4     | 0,437979 | 0,00294  | 0,001 | 0     | 1 |
| Ccdc120   | 0,437979 | 0,00294  | 0,001 | 0     | 1 |
| Adamts10  | 0,437979 | 0,00294  | 0,001 | 0     | 1 |
| 4933407L2 | 0,437979 | 0,001961 | 0,001 | 0     | 1 |
| Ptgs2     | 0,437979 | 0,001961 | 0,001 | 0     | 1 |
| Ildr2     | 0,437979 | 0,001961 | 0,001 | 0     | 1 |
| Cdca7     | 0,437979 | 0,001961 | 0,001 | 0     | 1 |
| 4933423P2 | 0,437979 | 0,001961 | 0,001 | 0     | 1 |
| Stoml3    | 0,437979 | 0,001961 | 0,001 | 0     | 1 |
| Cd53      | 0,437979 | 0,001961 | 0,001 | 0     | 1 |
| Smim17    | 0,437979 | 0,001961 | 0,001 | 0     | 1 |
| Dll3      | 0,437979 | 0,001961 | 0,001 | 0     | 1 |
| Lilr4b    | 0,437979 | 0,001961 | 0,001 | 0     | 1 |
| Kcnmb4os  | 0,437979 | 0,001961 | 0,001 | 0     | 1 |
| Adgrg3    | 0,437979 | 0,001961 | 0,001 | 0     | 1 |
| Tsnaxip1  | 0,437979 | 0,001961 | 0,001 | 0     | 1 |
| Nid2      | 0,437979 | 0,001961 | 0,001 | 0     | 1 |
| Dleu7     | 0,437979 | 0,001961 | 0,001 | 0     | 1 |
| Vwc2      | 0,437979 | 0,001961 | 0,001 | 0     | 1 |
| Havcr2    | 0,437979 | 0,001961 | 0,001 | 0     | 1 |
| Rap1gap2  | 0,437979 | 0,001961 | 0,001 | 0     | 1 |
| Hk3       | 0,437979 | 0,001961 | 0,001 | 0     | 1 |
| Cdh18     | 0,437979 | 0,001961 | 0,001 | 0     | 1 |
| Cacng2    | 0,437979 | 0,001961 | 0,001 | 0     | 1 |
| Gda       | 0,437979 | 0,001961 | 0,001 | 0     | 1 |
| Sulf1     | 0,437979 | 0,000981 | 0,001 | 0     | 1 |
| Sp110     | 0,437979 | 0,000981 | 0,001 | 0     | 1 |

|           |          |          |       |   |   |
|-----------|----------|----------|-------|---|---|
| 2810459M  | 0,437979 | 0,000981 | 0,001 | 0 | 1 |
| Inpp5d    | 0,437979 | 0,000981 | 0,001 | 0 | 1 |
| Bok       | 0,437979 | 0,000981 | 0,001 | 0 | 1 |
| Tmem37    | 0,437979 | 0,000981 | 0,001 | 0 | 1 |
| Ctse      | 0,437979 | 0,000981 | 0,001 | 0 | 1 |
| Prelp     | 0,437979 | 0,000981 | 0,001 | 0 | 1 |
| F11r      | 0,437979 | 0,000981 | 0,001 | 0 | 1 |
| Gm34342   | 0,437979 | 0,000981 | 0,001 | 0 | 1 |
| Kcnh1     | 0,437979 | 0,000981 | 0,001 | 0 | 1 |
| Traf3ip3  | 0,437979 | 0,000981 | 0,001 | 0 | 1 |
| Proser2   | 0,437979 | 0,000981 | 0,001 | 0 | 1 |
| 1700007K: | 0,437979 | 0,000981 | 0,001 | 0 | 1 |
| Ptges     | 0,437979 | 0,000981 | 0,001 | 0 | 1 |
| C130021I2 | 0,437979 | 0,000981 | 0,001 | 0 | 1 |
| Pamr1     | 0,437979 | 0,000981 | 0,001 | 0 | 1 |
| Pak6      | 0,437979 | 0,000981 | 0,001 | 0 | 1 |
| Plcb2     | 0,437979 | 0,000981 | 0,001 | 0 | 1 |
| Dusp2     | 0,437979 | 0,000981 | 0,001 | 0 | 1 |
| Gm14005   | 0,437979 | 0,000981 | 0,001 | 0 | 1 |
| Mertk     | 0,437979 | 0,000981 | 0,001 | 0 | 1 |
| Necab3    | 0,437979 | 0,000981 | 0,001 | 0 | 1 |
| Chst7     | 0,437979 | 0,000981 | 0,001 | 0 | 1 |
| Slc9a7    | 0,437979 | 0,000981 | 0,001 | 0 | 1 |
| Bgn       | 0,437979 | 0,000981 | 0,001 | 0 | 1 |
| Itm2a     | 0,437979 | 0,000981 | 0,001 | 0 | 1 |
| Pou3f4    | 0,437979 | 0,000981 | 0,001 | 0 | 1 |
| Rps6ka6   | 0,437979 | 0,000981 | 0,001 | 0 | 1 |
| Kctd12b   | 0,437979 | 0,000981 | 0,001 | 0 | 1 |
| Tlr7      | 0,437979 | 0,000981 | 0,001 | 0 | 1 |
| Fabp4     | 0,437979 | 0,000981 | 0,001 | 0 | 1 |
| A830092H: | 0,437979 | 0,000981 | 0,001 | 0 | 1 |
| P2ry1     | 0,437979 | 0,000981 | 0,001 | 0 | 1 |
| Wdr49     | 0,437979 | 0,000981 | 0,001 | 0 | 1 |
| Kirrel    | 0,437979 | 0,000981 | 0,001 | 0 | 1 |
| Cd5l      | 0,437979 | 0,000981 | 0,001 | 0 | 1 |
| Lrrc71    | 0,437979 | 0,000981 | 0,001 | 0 | 1 |
| Tnfaip8l2 | 0,437979 | 0,000981 | 0,001 | 0 | 1 |
| Spag17    | 0,437979 | 0,000981 | 0,001 | 0 | 1 |
| Dennd2c   | 0,437979 | 0,000981 | 0,001 | 0 | 1 |
| 5330417C: | 0,437979 | 0,000981 | 0,001 | 0 | 1 |
| Plppr4    | 0,437979 | 0,000981 | 0,001 | 0 | 1 |
| Slc44a3   | 0,437979 | 0,000981 | 0,001 | 0 | 1 |
| Ndst3     | 0,437979 | 0,000981 | 0,001 | 0 | 1 |
| Dapp1     | 0,437979 | 0,000981 | 0,001 | 0 | 1 |
| Col24a1   | 0,437979 | 0,000981 | 0,001 | 0 | 1 |
| Slc44a5   | 0,437979 | 0,000981 | 0,001 | 0 | 1 |
| Gm11837   | 0,437979 | 0,000981 | 0,001 | 0 | 1 |
| Podn      | 0,437979 | 0,000981 | 0,001 | 0 | 1 |
| Pdzk1ip1  | 0,437979 | 0,000981 | 0,001 | 0 | 1 |
| Fgr       | 0,437979 | 0,000981 | 0,001 | 0 | 1 |
| Cnr2      | 0,437979 | 0,000981 | 0,001 | 0 | 1 |
| Lrrc38    | 0,437979 | 0,000981 | 0,001 | 0 | 1 |

|          |          |          |       |   |   |
|----------|----------|----------|-------|---|---|
| Tnfrsf1b | 0,437979 | 0,000981 | 0,001 | 0 | 1 |
| Otof     | 0,437979 | 0,000981 | 0,001 | 0 | 1 |
| Igfbp7   | 0,437979 | 0,000981 | 0,001 | 0 | 1 |
| Stbd1    | 0,437979 | 0,000981 | 0,001 | 0 | 1 |
| Prdm8    | 0,437979 | 0,000981 | 0,001 | 0 | 1 |
| Prkg2    | 0,437979 | 0,000981 | 0,001 | 0 | 1 |
| Ksr2     | 0,437979 | 0,000981 | 0,001 | 0 | 1 |
| Sdsl     | 0,437979 | 0,000981 | 0,001 | 0 | 1 |
| Morn3    | 0,437979 | 0,000981 | 0,001 | 0 | 1 |
| Vgf      | 0,437979 | 0,000981 | 0,001 | 0 | 1 |
| Tfr2     | 0,437979 | 0,000981 | 0,001 | 0 | 1 |
| Gm15410  | 0,437979 | 0,000981 | 0,001 | 0 | 1 |
| Gm3294   | 0,437979 | 0,000981 | 0,001 | 0 | 1 |
| Prrt4    | 0,437979 | 0,000981 | 0,001 | 0 | 1 |
| Hoxa10   | 0,437979 | 0,000981 | 0,001 | 0 | 1 |
| Gm16499  | 0,437979 | 0,000981 | 0,001 | 0 | 1 |
| Gprin3   | 0,437979 | 0,000981 | 0,001 | 0 | 1 |
| Tnip3    | 0,437979 | 0,000981 | 0,001 | 0 | 1 |
| Prokr1   | 0,437979 | 0,000981 | 0,001 | 0 | 1 |
| Fam19a4  | 0,437979 | 0,000981 | 0,001 | 0 | 1 |
| Vwf      | 0,437979 | 0,000981 | 0,001 | 0 | 1 |
| 9330179D | 0,437979 | 0,000981 | 0,001 | 0 | 1 |
| Prmt8    | 0,437979 | 0,000981 | 0,001 | 0 | 1 |
| Arhgdib  | 0,437979 | 0,000981 | 0,001 | 0 | 1 |
| Rerg     | 0,437979 | 0,000981 | 0,001 | 0 | 1 |
| Lrmp     | 0,437979 | 0,000981 | 0,001 | 0 | 1 |
| Pira2    | 0,437979 | 0,000981 | 0,001 | 0 | 1 |
| Lair1    | 0,437979 | 0,000981 | 0,001 | 0 | 1 |
| Syt5     | 0,437979 | 0,000981 | 0,001 | 0 | 1 |
| Shisa7   | 0,437979 | 0,000981 | 0,001 | 0 | 1 |
| Bcam     | 0,437979 | 0,000981 | 0,001 | 0 | 1 |
| Hcst     | 0,437979 | 0,000981 | 0,001 | 0 | 1 |
| Dmkn     | 0,437979 | 0,000981 | 0,001 | 0 | 1 |
| E2f8     | 0,437979 | 0,000981 | 0,001 | 0 | 1 |
| A730056A | 0,437979 | 0,000981 | 0,001 | 0 | 1 |
| Acan     | 0,437979 | 0,000981 | 0,001 | 0 | 1 |
| Gm35040  | 0,437979 | 0,000981 | 0,001 | 0 | 1 |
| Cfap161  | 0,437979 | 0,000981 | 0,001 | 0 | 1 |
| A230065N | 0,437979 | 0,000981 | 0,001 | 0 | 1 |
| P2ry6    | 0,437979 | 0,000981 | 0,001 | 0 | 1 |
| Folr1    | 0,437979 | 0,000981 | 0,001 | 0 | 1 |
| Gm4070   | 0,437979 | 0,000981 | 0,001 | 0 | 1 |
| Igsf6    | 0,437979 | 0,000981 | 0,001 | 0 | 1 |
| Gsg1l    | 0,437979 | 0,000981 | 0,001 | 0 | 1 |
| Doc2a    | 0,437979 | 0,000981 | 0,001 | 0 | 1 |
| Chst15   | 0,437979 | 0,000981 | 0,001 | 0 | 1 |
| Sprn     | 0,437979 | 0,000981 | 0,001 | 0 | 1 |
| Myb      | 0,437979 | 0,000981 | 0,001 | 0 | 1 |
| Cabcoco1 | 0,437979 | 0,000981 | 0,001 | 0 | 1 |
| Trpm2    | 0,437979 | 0,000981 | 0,001 | 0 | 1 |
| Slc1a6   | 0,437979 | 0,000981 | 0,001 | 0 | 1 |
| Shc2     | 0,437979 | 0,000981 | 0,001 | 0 | 1 |

|          |          |          |       |   |   |
|----------|----------|----------|-------|---|---|
| Grin3b   | 0,437979 | 0,000981 | 0,001 | 0 | 1 |
| Ascl1    | 0,437979 | 0,000981 | 0,001 | 0 | 1 |
| Cfap54   | 0,437979 | 0,000981 | 0,001 | 0 | 1 |
| Ntn4     | 0,437979 | 0,000981 | 0,001 | 0 | 1 |
| Lin7a    | 0,437979 | 0,000981 | 0,001 | 0 | 1 |
| E2f7     | 0,437979 | 0,000981 | 0,001 | 0 | 1 |
| Grip1    | 0,437979 | 0,000981 | 0,001 | 0 | 1 |
| Myo16    | 0,437979 | 0,000981 | 0,001 | 0 | 1 |
| Angpt2   | 0,437979 | 0,000981 | 0,001 | 0 | 1 |
| Adam5    | 0,437979 | 0,000981 | 0,001 | 0 | 1 |
| Hapln4   | 0,437979 | 0,000981 | 0,001 | 0 | 1 |
| Nod2     | 0,437979 | 0,000981 | 0,001 | 0 | 1 |
| Irx3os   | 0,437979 | 0,000981 | 0,001 | 0 | 1 |
| Bean1    | 0,437979 | 0,000981 | 0,001 | 0 | 1 |
| Slc9a5   | 0,437979 | 0,000981 | 0,001 | 0 | 1 |
| Hydin    | 0,437979 | 0,000981 | 0,001 | 0 | 1 |
| Spire2   | 0,437979 | 0,000981 | 0,001 | 0 | 1 |
| Dnah12   | 0,437979 | 0,000981 | 0,001 | 0 | 1 |
| 1810011H | 0,437979 | 0,000981 | 0,001 | 0 | 1 |
| Wdfy4    | 0,437979 | 0,000981 | 0,001 | 0 | 1 |
| Gch1     | 0,437979 | 0,000981 | 0,001 | 0 | 1 |
| Phf11b   | 0,437979 | 0,000981 | 0,001 | 0 | 1 |
| Arl11    | 0,437979 | 0,000981 | 0,001 | 0 | 1 |
| Fam167a  | 0,437979 | 0,000981 | 0,001 | 0 | 1 |
| Pbk      | 0,437979 | 0,000981 | 0,001 | 0 | 1 |
| Rubcnl   | 0,437979 | 0,000981 | 0,001 | 0 | 1 |
| Fam216b  | 0,437979 | 0,000981 | 0,001 | 0 | 1 |
| Gm4675   | 0,437979 | 0,000981 | 0,001 | 0 | 1 |
| Pgr      | 0,437979 | 0,000981 | 0,001 | 0 | 1 |
| Gm26592  | 0,437979 | 0,000981 | 0,001 | 0 | 1 |
| Layn     | 0,437979 | 0,000981 | 0,001 | 0 | 1 |
| Cgnl1    | 0,437979 | 0,000981 | 0,001 | 0 | 1 |
| Ddx43    | 0,437979 | 0,000981 | 0,001 | 0 | 1 |
| Plscr4   | 0,437979 | 0,000981 | 0,001 | 0 | 1 |
| Cx3cr1   | 0,437979 | 0,000981 | 0,001 | 0 | 1 |
| Osm      | 0,437979 | 0,000981 | 0,001 | 0 | 1 |
| Myo1g    | 0,437979 | 0,000981 | 0,001 | 0 | 1 |
| Igfbp3   | 0,437979 | 0,000981 | 0,001 | 0 | 1 |
| C1qtnf2  | 0,437979 | 0,000981 | 0,001 | 0 | 1 |
| Shisa6   | 0,437979 | 0,000981 | 0,001 | 0 | 1 |
| Tekt1    | 0,437979 | 0,000981 | 0,001 | 0 | 1 |
| Coro6    | 0,437979 | 0,000981 | 0,001 | 0 | 1 |
| Adap2    | 0,437979 | 0,000981 | 0,001 | 0 | 1 |
| Nog      | 0,437979 | 0,000981 | 0,001 | 0 | 1 |
| Abi3     | 0,437979 | 0,000981 | 0,001 | 0 | 1 |
| Skap1    | 0,437979 | 0,000981 | 0,001 | 0 | 1 |
| 2810433D | 0,437979 | 0,000981 | 0,001 | 0 | 1 |
| Gjc1     | 0,437979 | 0,000981 | 0,001 | 0 | 1 |
| Cd300lb  | 0,437979 | 0,000981 | 0,001 | 0 | 1 |
| Gng4     | 0,437979 | 0,000981 | 0,001 | 0 | 1 |
| Hist1h1b | 0,437979 | 0,000981 | 0,001 | 0 | 1 |
| Gcnt2    | 0,437979 | 0,000981 | 0,001 | 0 | 1 |

|           |          |          |       |   |   |
|-----------|----------|----------|-------|---|---|
| S1pr3     | 0,437979 | 0,000981 | 0,001 | 0 | 1 |
| Diras2    | 0,437979 | 0,000981 | 0,001 | 0 | 1 |
| Dapk1     | 0,437979 | 0,000981 | 0,001 | 0 | 1 |
| Pcsk1     | 0,437979 | 0,000981 | 0,001 | 0 | 1 |
| Hapln1    | 0,437979 | 0,000981 | 0,001 | 0 | 1 |
| AW495222  | 0,437979 | 0,000981 | 0,001 | 0 | 1 |
| lqgap2    | 0,437979 | 0,000981 | 0,001 | 0 | 1 |
| F2r12     | 0,437979 | 0,000981 | 0,001 | 0 | 1 |
| Gm5086    | 0,437979 | 0,000981 | 0,001 | 0 | 1 |
| Gpx8      | 0,437979 | 0,000981 | 0,001 | 0 | 1 |
| Gm33680   | 0,437979 | 0,000981 | 0,001 | 0 | 1 |
| Prkch     | 0,437979 | 0,000981 | 0,001 | 0 | 1 |
| Kcnk10    | 0,437979 | 0,000981 | 0,001 | 0 | 1 |
| Gpr68     | 0,437979 | 0,000981 | 0,001 | 0 | 1 |
| Pld4      | 0,437979 | 0,000981 | 0,001 | 0 | 1 |
| Cdca7l    | 0,437979 | 0,000981 | 0,001 | 0 | 1 |
| Fam105a   | 0,437979 | 0,000981 | 0,001 | 0 | 1 |
| Dnah5     | 0,437979 | 0,000981 | 0,001 | 0 | 1 |
| Rgs22     | 0,437979 | 0,000981 | 0,001 | 0 | 1 |
| Adcy8     | 0,437979 | 0,000981 | 0,001 | 0 | 1 |
| Gsdmd     | 0,437979 | 0,000981 | 0,001 | 0 | 1 |
| Rac2      | 0,437979 | 0,000981 | 0,001 | 0 | 1 |
| Mfng      | 0,437979 | 0,000981 | 0,001 | 0 | 1 |
| Kdelr3    | 0,437979 | 0,000981 | 0,001 | 0 | 1 |
| Cacna1i   | 0,437979 | 0,000981 | 0,001 | 0 | 1 |
| Celsr1    | 0,437979 | 0,000981 | 0,001 | 0 | 1 |
| Mapk11    | 0,437979 | 0,000981 | 0,001 | 0 | 1 |
| Odf3b     | 0,437979 | 0,000981 | 0,001 | 0 | 1 |
| Syt10     | 0,437979 | 0,000981 | 0,001 | 0 | 1 |
| AC101921. | 0,437979 | 0,000981 | 0,001 | 0 | 1 |
| Ccdc65    | 0,437979 | 0,000981 | 0,001 | 0 | 1 |
| Pkp2      | 0,437979 | 0,000981 | 0,001 | 0 | 1 |
| AC118542. | 0,437979 | 0,000981 | 0,001 | 0 | 1 |
| Gp1bb     | 0,437979 | 0,000981 | 0,001 | 0 | 1 |
| Gm26569   | 0,437979 | 0,000981 | 0,001 | 0 | 1 |
| Hcls1     | 0,437979 | 0,000981 | 0,001 | 0 | 1 |
| Cfap44    | 0,437979 | 0,000981 | 0,001 | 0 | 1 |
| Ccdc80    | 0,437979 | 0,000981 | 0,001 | 0 | 1 |
| Epha3     | 0,437979 | 0,000981 | 0,001 | 0 | 1 |
| Chodl     | 0,437979 | 0,000981 | 0,001 | 0 | 1 |
| Airn      | 0,437979 | 0,000981 | 0,001 | 0 | 1 |
| Fgd2      | 0,437979 | 0,000981 | 0,001 | 0 | 1 |
| H2-DMb1   | 0,437979 | 0,000981 | 0,001 | 0 | 1 |
| H2-Aa     | 0,437979 | 0,000981 | 0,001 | 0 | 1 |
| Lrfn2     | 0,437979 | 0,000981 | 0,001 | 0 | 1 |
| Plin5     | 0,437979 | 0,000981 | 0,001 | 0 | 1 |
| Tnfaip8l1 | 0,437979 | 0,000981 | 0,001 | 0 | 1 |
| Xdh       | 0,437979 | 0,000981 | 0,001 | 0 | 1 |
| Kcnk12    | 0,437979 | 0,000981 | 0,001 | 0 | 1 |
| Rnf165    | 0,437979 | 0,000981 | 0,001 | 0 | 1 |
| Slc14a1   | 0,437979 | 0,000981 | 0,001 | 0 | 1 |
| Lrp5      | 0,437979 | 0,000981 | 0,001 | 0 | 1 |



|           |          |          |       |       |   |
|-----------|----------|----------|-------|-------|---|
| Cdca5     | 0,437979 | 0,000981 | 0,001 | 0     | 1 |
| Fermt3    | 0,437979 | 0,000981 | 0,001 | 0     | 1 |
| Ms4a6d    | 0,437979 | 0,000981 | 0,001 | 0     | 1 |
| Trpm6     | 0,437979 | 0,000981 | 0,001 | 0     | 1 |
| Mamdc2    | 0,437979 | 0,000981 | 0,001 | 0     | 1 |
| Fas       | 0,437979 | 0,000981 | 0,001 | 0     | 1 |
| Ifit1bl1  | 0,437979 | 0,000981 | 0,001 | 0     | 1 |
| Hhex      | 0,437979 | 0,000981 | 0,001 | 0     | 1 |
| Rbp4      | 0,437979 | 0,000981 | 0,001 | 0     | 1 |
| Pnlip     | 0,437979 | 0,000981 | 0,001 | 0     | 1 |
| Dmpk      | 0,438207 | 0,023043 | 0,194 | 0,18  | 1 |
| Zdhhc12   | 0,438351 | -0,01411 | 0,26  | 0,278 | 1 |
| Parl      | 0,438374 | -0,00836 | 0,52  | 0,548 | 1 |
| Ntsr2     | 0,438544 | -0,00619 | 0,022 | 0,028 | 1 |
| Plxnb1    | 0,438612 | 0,044205 | 0,481 | 0,47  | 1 |
| Agrn      | 0,43868  | -0,01983 | 0,221 | 0,236 | 1 |
| Rragc     | 0,438719 | 0,030691 | 0,557 | 0,545 | 1 |
| A730063M  | 0,438763 | 0,008991 | 0,047 | 0,039 | 1 |
| Atf6      | 0,43883  | -0,02598 | 0,362 | 0,377 | 1 |
| Abhd17a   | 0,438871 | -0,01088 | 0,843 | 0,863 | 1 |
| Gm47802   | 0,438957 | 0,006823 | 0,026 | 0,02  | 1 |
| Gm32051   | 0,438957 | 0,019699 | 0,024 | 0,018 | 1 |
| Avl9      | 0,43897  | -0,01206 | 0,475 | 0,499 | 1 |
| Isoc2a    | 0,439139 | 0,01176  | 0,202 | 0,185 | 1 |
| Hykk      | 0,439144 | -0,00557 | 0,022 | 0,028 | 1 |
| Rcan2     | 0,439182 | 0,022377 | 0,946 | 0,953 | 1 |
| Tmem14a   | 0,439219 | -0,01952 | 0,471 | 0,488 | 1 |
| Ppp4r4    | 0,439244 | -0,01265 | 0,027 | 0,034 | 1 |
| Syde1     | 0,439518 | -0,01358 | 0,113 | 0,125 | 1 |
| Apex2     | 0,439751 | -0,0128  | 0,081 | 0,093 | 1 |
| Pard6a    | 0,439837 | 0,016467 | 0,205 | 0,19  | 1 |
| Mphosph9  | 0,440169 | -0,02687 | 0,166 | 0,179 | 1 |
| Aldh7a1   | 0,440208 | -0,01615 | 0,297 | 0,319 | 1 |
| Zbtb10    | 0,440238 | -0,02008 | 0,132 | 0,145 | 1 |
| Cpt1c     | 0,440501 | -0,01061 | 0,255 | 0,272 | 1 |
| Fjx1      | 0,440562 | 0,025499 | 0,072 | 0,062 | 1 |
| 2900055J2 | 0,440621 | 0,014842 | 0,108 | 0,096 | 1 |
| Sgtb      | 0,44075  | -0,00585 | 0,048 | 0,057 | 1 |
| Smg8      | 0,440756 | -0,00813 | 0,081 | 0,093 | 1 |
| AI314180  | 0,441091 | -0,03119 | 0,534 | 0,538 | 1 |
| Mrpl40    | 0,441098 | -0,01904 | 0,381 | 0,4   | 1 |
| Slc45a1   | 0,441382 | -0,00721 | 0,062 | 0,072 | 1 |
| Gskip     | 0,441597 | -0,01982 | 0,259 | 0,275 | 1 |
| Inafm2    | 0,441717 | -0,00661 | 0,302 | 0,322 | 1 |
| Cep72     | 0,441733 | -0,00388 | 0,11  | 0,124 | 1 |
| Syngn2    | 0,441745 | -0,02351 | 0,512 | 0,528 | 1 |
| Rpl31     | 0,441762 | 0,010484 | 0,961 | 0,948 | 1 |
| Galt      | 0,441809 | -0,00399 | 0,022 | 0,028 | 1 |
| Ppp1r12a  | 0,441841 | -0,0253  | 0,78  | 0,802 | 1 |
| Lcp1      | 0,442113 | -0,01569 | 0,091 | 0,102 | 1 |
| Nucks1    | 0,44218  | -0,02698 | 0,974 | 0,99  | 1 |
| Tars2     | 0,442207 | -0,01694 | 0,232 | 0,247 | 1 |

|           |          |          |       |       |   |
|-----------|----------|----------|-------|-------|---|
| Amz1      | 0,442258 | 0,00651  | 0,024 | 0,018 | 1 |
| Nhsl2     | 0,442533 | -0,00762 | 0,012 | 0,016 | 1 |
| Fam234b   | 0,442579 | -0,00215 | 0,444 | 0,47  | 1 |
| Slc16a3   | 0,442603 | -0,00497 | 0,042 | 0,05  | 1 |
| Safb2     | 0,44266  | -0,00262 | 0,594 | 0,628 | 1 |
| Ggt7      | 0,442677 | -0,00983 | 0,233 | 0,25  | 1 |
| Fundc2    | 0,442966 | -0,0178  | 0,423 | 0,447 | 1 |
| Slc31a1   | 0,443132 | 0,014019 | 0,083 | 0,073 | 1 |
| Tln2      | 0,443164 | 0,03013  | 0,5   | 0,488 | 1 |
| Gm8013    | 0,443232 | -0,00647 | 0,025 | 0,031 | 1 |
| Slc25a40  | 0,443239 | -0,00401 | 0,121 | 0,135 | 1 |
| Fam214a   | 0,443263 | -0,01721 | 0,228 | 0,244 | 1 |
| 311008211 | 0,443413 | -0,00651 | 0,045 | 0,054 | 1 |
| Frat2     | 0,44344  | 0,014962 | 0,07  | 0,06  | 1 |
| Ypel2     | 0,443447 | -0,00825 | 0,972 | 0,967 | 1 |
| Itih3     | 0,443549 | -0,01346 | 0,213 | 0,231 | 1 |
| Mef2a     | 0,44371  | 0,066533 | 0,745 | 0,766 | 1 |
| Heatr5b   | 0,443793 | -0,00513 | 0,193 | 0,211 | 1 |
| Rab1b     | 0,444004 | -0,01883 | 0,663 | 0,668 | 1 |
| Gtf3c4    | 0,444137 | -0,02188 | 0,177 | 0,19  | 1 |
| Zc3h18    | 0,444203 | 0,00078  | 0,436 | 0,467 | 1 |
| Hif1a     | 0,444307 | -0,03763 | 0,53  | 0,525 | 1 |
| Gnpnat1   | 0,444625 | -0,02461 | 0,241 | 0,257 | 1 |
| Prdm4     | 0,444634 | 0,010191 | 0,126 | 0,112 | 1 |
| Gm3854    | 0,444657 | 0,010858 | 0,045 | 0,037 | 1 |
| Prss36    | 0,444924 | -0,01372 | 0,07  | 0,08  | 1 |
| Ppp1r3f   | 0,445191 | 0,01736  | 0,102 | 0,091 | 1 |
| Faf1      | 0,44523  | 0,020337 | 0,315 | 0,301 | 1 |
| Ergic3    | 0,445277 | -0,00548 | 0,722 | 0,75  | 1 |
| 5033417F2 | 0,44529  | -0,0069  | 0,039 | 0,047 | 1 |
| Pole      | 0,445485 | 0,007459 | 0,024 | 0,018 | 1 |
| Zbtb45    | 0,44553  | 0,011992 | 0,113 | 0,101 | 1 |
| Zfp759    | 0,445595 | -0,01223 | 0,053 | 0,062 | 1 |
| Gadd45gip | 0,445775 | 0,005871 | 0,503 | 0,473 | 1 |
| Plag1     | 0,445937 | 0,014084 | 0,104 | 0,093 | 1 |
| Shpk      | 0,446084 | -0,00505 | 0,012 | 0,016 | 1 |
| Tmtc1     | 0,446404 | -0,00442 | 0,012 | 0,016 | 1 |
| Nsg2      | 0,446404 | -0,00442 | 0,012 | 0,016 | 1 |
| Ralb      | 0,446597 | -0,00221 | 0,198 | 0,216 | 1 |
| Arap1     | 0,446761 | 1,95E-05 | 0,292 | 0,319 | 1 |
| 9330020H  | 0,446811 | 0,006501 | 0,036 | 0,029 | 1 |
| Cpsf1     | 0,447133 | -0,00978 | 0,188 | 0,205 | 1 |
| Ubxn4     | 0,447174 | 0,026795 | 0,847 | 0,834 | 1 |
| Il17ra    | 0,447221 | 0,019389 | 0,102 | 0,091 | 1 |
| Zfp873    | 0,447344 | -0,0058  | 0,03  | 0,037 | 1 |
| Zfp97     | 0,447381 | -0,00568 | 0,012 | 0,016 | 1 |
| Pemt      | 0,447401 | 0,010291 | 0,034 | 0,028 | 1 |
| Scd1      | 0,447404 | 0,000881 | 0,736 | 0,743 | 1 |
| Gle1      | 0,447435 | -0,0206  | 0,414 | 0,429 | 1 |
| Mdm4      | 0,447948 | -0,00631 | 0,676 | 0,65  | 1 |
| Dsn1      | 0,448026 | -0,00345 | 0,012 | 0,016 | 1 |
| Acot8     | 0,448031 | -0,01276 | 0,218 | 0,236 | 1 |

|           |          |          |       |       |   |
|-----------|----------|----------|-------|-------|---|
| Pcdh19    | 0,448034 | 0,001402 | 0,012 | 0,016 | 1 |
| Tmem150c  | 0,448136 | 0,000384 | 0,415 | 0,447 | 1 |
| 2410004B: | 0,448187 | -0,0305  | 0,505 | 0,512 | 1 |
| Slc35e4   | 0,448217 | -0,009   | 0,479 | 0,499 | 1 |
| Rab31     | 0,448509 | 0,037617 | 0,932 | 0,958 | 1 |
| Gemin2    | 0,448704 | 0,013077 | 0,164 | 0,15  | 1 |
| Gap43     | 0,448835 | -0,00069 | 0,038 | 0,031 | 1 |
| Arhgap31  | 0,448927 | -0,0076  | 0,318 | 0,345 | 1 |
| Arhgap33  | 0,448945 | -0,01387 | 0,225 | 0,241 | 1 |
| Larp4     | 0,448986 | -0,01306 | 0,551 | 0,571 | 1 |
| Ppp6c     | 0,449109 | 0,011831 | 0,548 | 0,515 | 1 |
| Fstl3     | 0,449127 | 0,003684 | 0,033 | 0,041 | 1 |
| Rtcb      | 0,44926  | -0,02435 | 0,565 | 0,574 | 1 |
| Gabpb1    | 0,449264 | 0,012218 | 0,12  | 0,107 | 1 |
| Camkmt    | 0,44957  | 0,015207 | 0,081 | 0,072 | 1 |
| Gas8      | 0,449683 | -0,01685 | 0,162 | 0,176 | 1 |
| Rfc3      | 0,449732 | 2,04E-05 | 0,14  | 0,156 | 1 |
| Bri3bp    | 0,449853 | 0,017164 | 0,155 | 0,141 | 1 |
| Krt10     | 0,4499   | -0,00726 | 0,261 | 0,283 | 1 |
| Nfia      | 0,450044 | 0,035412 | 0,897 | 0,893 | 1 |
| Gtf2i     | 0,450209 | 0,038271 | 0,782 | 0,769 | 1 |
| Ubl4a     | 0,450424 | -0,01776 | 0,261 | 0,276 | 1 |
| Aldh16a1  | 0,450433 | 0,015538 | 0,136 | 0,124 | 1 |
| Plk4      | 0,450559 | 0,020664 | 0,081 | 0,072 | 1 |
| Zfp426    | 0,450561 | -0,00926 | 0,187 | 0,203 | 1 |
| Sharpin   | 0,450847 | -0,01869 | 0,247 | 0,262 | 1 |
| Usp34     | 0,450848 | 0,019826 | 0,742 | 0,73  | 1 |
| Zwilch    | 0,450944 | 0,008684 | 0,045 | 0,037 | 1 |
| Snap91    | 0,450949 | 0,002187 | 0,123 | 0,109 | 1 |
| Pdhb      | 0,451061 | -0,00199 | 0,574 | 0,597 | 1 |
| Zscan22   | 0,451157 | -0,00802 | 0,103 | 0,115 | 1 |
| Arhgef6   | 0,45128  | -0,00152 | 0,012 | 0,016 | 1 |
| Iqsec2    | 0,451365 | -0,00356 | 0,027 | 0,034 | 1 |
| A430106G: | 0,451405 | 0,018498 | 0,118 | 0,133 | 1 |
| Spg7      | 0,45149  | -0,00451 | 0,366 | 0,392 | 1 |
| Cog6      | 0,451773 | -0,01423 | 0,22  | 0,236 | 1 |
| Kat6b     | 0,451859 | 0,005383 | 0,235 | 0,255 | 1 |
| Cep85     | 0,451878 | -0,01248 | 0,158 | 0,172 | 1 |
| D17H6S53  | 0,451914 | 0,011194 | 0,149 | 0,135 | 1 |
| Fuca2     | 0,451991 | -0,01854 | 0,174 | 0,187 | 1 |
| Ubxn7     | 0,452172 | -0,01044 | 0,375 | 0,4   | 1 |
| Drap1     | 0,452183 | 0,031158 | 0,847 | 0,828 | 1 |
| Ttbk2     | 0,452234 | -0,02698 | 0,388 | 0,405 | 1 |
| Unc50     | 0,452265 | -0,00953 | 0,759 | 0,78  | 1 |
| Tmem67    | 0,452284 | -0,00795 | 0,092 | 0,104 | 1 |
| Ctif      | 0,452339 | -0,03823 | 0,256 | 0,268 | 1 |
| Eif5      | 0,452428 | 0,021364 | 0,956 | 0,946 | 1 |
| Puf60     | 0,452767 | 0,017551 | 0,882 | 0,888 | 1 |
| Tspan2os  | 0,452857 | 0,00902  | 0,034 | 0,028 | 1 |
| Fam219b   | 0,452858 | -0,02322 | 0,25  | 0,265 | 1 |
| Ddhd1     | 0,452868 | 0,085244 | 0,66  | 0,657 | 1 |
| Mbd1      | 0,452975 | -0,01824 | 0,255 | 0,272 | 1 |

|           |          |          |       |       |   |
|-----------|----------|----------|-------|-------|---|
| Palm      | 0,45299  | 0,035005 | 0,214 | 0,203 | 1 |
| Malsu1    | 0,453025 | -0,02292 | 0,318 | 0,332 | 1 |
| Efna2     | 0,453105 | 0,012254 | 0,271 | 0,252 | 1 |
| Dtx2      | 0,453281 | -0,00018 | 0,112 | 0,125 | 1 |
| Fez2      | 0,453381 | 0,023334 | 0,572 | 0,558 | 1 |
| Arid4a    | 0,453467 | -0,01358 | 0,43  | 0,447 | 1 |
| Bag1      | 0,453475 | -0,02202 | 0,409 | 0,426 | 1 |
| Txlna     | 0,45348  | -0,03742 | 0,583 | 0,598 | 1 |
| Snw1      | 0,453559 | -0,00631 | 0,807 | 0,834 | 1 |
| Trrap     | 0,453686 | -0,01097 | 0,395 | 0,418 | 1 |
| Ccdc9     | 0,453687 | -0,01294 | 0,144 | 0,158 | 1 |
| Coq2      | 0,453819 | -0,01277 | 0,391 | 0,411 | 1 |
| 1700029JC | 0,453839 | -0,00703 | 0,114 | 0,127 | 1 |
| Rnf19a    | 0,453858 | 0,001061 | 0,342 | 0,366 | 1 |
| Mbtps2    | 0,454065 | -0,00411 | 0,271 | 0,289 | 1 |
| Tmem198b  | 0,454067 | -0,00196 | 0,033 | 0,041 | 1 |
| Mrps18b   | 0,45415  | 0,045136 | 0,345 | 0,345 | 1 |
| Xkr8      | 0,454437 | -0,00682 | 0,065 | 0,075 | 1 |
| D10Wsu10  | 0,454481 | 0,072018 | 0,473 | 0,468 | 1 |
| BC017158  | 0,454568 | 0,012988 | 0,052 | 0,044 | 1 |
| Pip4k2c   | 0,454613 | -0,00252 | 0,424 | 0,455 | 1 |
| Nsg1      | 0,454712 | -0,0156  | 0,044 | 0,052 | 1 |
| Heatr5a   | 0,454736 | 0,034754 | 0,275 | 0,262 | 1 |
| Ctc1      | 0,454792 | -0,00894 | 0,138 | 0,153 | 1 |
| Sys1      | 0,454803 | -0,02611 | 0,919 | 0,937 | 1 |
| Gm20342   | 0,454857 | 0,002662 | 0,256 | 0,276 | 1 |
| Brsk1     | 0,454884 | 0,014129 | 0,264 | 0,246 | 1 |
| Map2k7    | 0,455012 | 0,011365 | 0,511 | 0,493 | 1 |
| Thap4     | 0,455195 | 0,011537 | 0,141 | 0,128 | 1 |
| Dbnl      | 0,455442 | 0,023348 | 0,52  | 0,517 | 1 |
| Nr2c2ap   | 0,455472 | 0,020797 | 0,4   | 0,385 | 1 |
| Nap1l2    | 0,455519 | 0,009066 | 0,02  | 0,015 | 1 |
| Aup1      | 0,455643 | 0,016261 | 0,567 | 0,548 | 1 |
| Txndc11   | 0,455741 | 0,030497 | 0,17  | 0,158 | 1 |
| Anapc13   | 0,455806 | -0,02106 | 0,705 | 0,724 | 1 |
| Rdm1      | 0,456095 | 0,02421  | 0,172 | 0,159 | 1 |
| Onecut2   | 0,456201 | -0,02424 | 0,15  | 0,163 | 1 |
| Cyb561d2  | 0,45636  | 0,033542 | 0,309 | 0,296 | 1 |
| Calm3     | 0,456487 | -0,02607 | 0,969 | 0,971 | 1 |
| Iqcc      | 0,456523 | -0,01579 | 0,18  | 0,193 | 1 |
| Pigo      | 0,456524 | 0,014594 | 0,075 | 0,065 | 1 |
| Foxk1     | 0,456584 | -0,00489 | 0,201 | 0,218 | 1 |
| Fzd7      | 0,456654 | -0,00326 | 0,146 | 0,161 | 1 |
| Pnpo      | 0,456655 | 0,006832 | 0,02  | 0,015 | 1 |
| Ern1      | 0,456658 | -0,01362 | 0,085 | 0,096 | 1 |
| Zfp777    | 0,456789 | 0,00819  | 0,115 | 0,102 | 1 |
| Zscan26   | 0,456978 | 0,025301 | 0,395 | 0,376 | 1 |
| Cdca4     | 0,457031 | -0,0001  | 0,03  | 0,037 | 1 |
| Bbs7      | 0,457141 | -0,02182 | 0,077 | 0,086 | 1 |
| Setx      | 0,457228 | 0,018507 | 0,422 | 0,46  | 1 |
| Xpo4      | 0,457363 | -0,01094 | 0,287 | 0,307 | 1 |
| Mbtd1     | 0,457384 | 0,034042 | 0,386 | 0,374 | 1 |

|           |          |          |       |       |   |
|-----------|----------|----------|-------|-------|---|
| Lsmem1    | 0,457772 | 0,00749  | 0,006 | 0,003 | 1 |
| 1810043G  | 0,457857 | -0,00375 | 0,237 | 0,257 | 1 |
| Gm10273   | 0,457942 | 0,005871 | 0,02  | 0,015 | 1 |
| Ttll1     | 0,458069 | -0,00689 | 0,111 | 0,124 | 1 |
| Dok1      | 0,458092 | 0,009066 | 0,02  | 0,015 | 1 |
| Fytd1     | 0,458266 | 0,032119 | 0,548 | 0,538 | 1 |
| Psm7      | 0,45827  | 0,018564 | 0,96  | 0,966 | 1 |
| Nrxn2     | 0,458286 | -0,03061 | 0,691 | 0,701 | 1 |
| Abcd1     | 0,458474 | 0,022868 | 0,186 | 0,174 | 1 |
| Dnajc9    | 0,458546 | 0,026287 | 0,325 | 0,311 | 1 |
| Tceanc2   | 0,458714 | -0,01255 | 0,232 | 0,249 | 1 |
| Gm15910   | 0,458857 | 0,004573 | 0,006 | 0,003 | 1 |
| AC125141. | 0,458857 | 0,006519 | 0,006 | 0,003 | 1 |
| Olfr267   | 0,458857 | 0,005547 | 0,006 | 0,003 | 1 |
| Arhgef15  | 0,458857 | 0,005547 | 0,006 | 0,003 | 1 |
| Atl1      | 0,458895 | 0,034719 | 0,411 | 0,402 | 1 |
| Wdr18     | 0,458918 | -0,01369 | 0,346 | 0,364 | 1 |
| Klhdc8b   | 0,458961 | -0,00749 | 0,015 | 0,02  | 1 |
| Bahd1     | 0,459112 | -0,01116 | 0,078 | 0,088 | 1 |
| Zbtb44    | 0,459319 | 0,022776 | 0,358 | 0,343 | 1 |
| Tdrp      | 0,4594   | 0,005547 | 0,006 | 0,003 | 1 |
| Rfx2      | 0,4594   | 0,004573 | 0,006 | 0,003 | 1 |
| A830008E2 | 0,4594   | 0,003599 | 0,006 | 0,003 | 1 |
| Gm37634   | 0,4594   | 0,003599 | 0,006 | 0,003 | 1 |
| Olfr1124  | 0,4594   | 0,003599 | 0,006 | 0,003 | 1 |
| Sap25     | 0,4594   | 0,003599 | 0,006 | 0,003 | 1 |
| Rasgef1a  | 0,4594   | 0,003599 | 0,006 | 0,003 | 1 |
| Gm26540   | 0,4594   | 0,003599 | 0,006 | 0,003 | 1 |
| Zfp82     | 0,4594   | 0,003599 | 0,006 | 0,003 | 1 |
| Adam12    | 0,4594   | 0,003599 | 0,006 | 0,003 | 1 |
| Llgl2     | 0,4594   | 0,003599 | 0,006 | 0,003 | 1 |
| Lrrc8e    | 0,459525 | 0,005231 | 0,02  | 0,015 | 1 |
| Plekha5   | 0,459579 | 0,00112  | 0,286 | 0,267 | 1 |
| Gm13563   | 0,459942 | 0,002624 | 0,006 | 0,003 | 1 |
| Dcst1     | 0,459942 | 0,002624 | 0,006 | 0,003 | 1 |
| Gm15477   | 0,459942 | 0,002624 | 0,006 | 0,003 | 1 |
| Gm42556   | 0,459942 | 0,002624 | 0,006 | 0,003 | 1 |
| Pcsk4     | 0,459942 | 0,002624 | 0,006 | 0,003 | 1 |
| Btbd11    | 0,459942 | 0,002624 | 0,006 | 0,003 | 1 |
| 493244311 | 0,459942 | 0,002624 | 0,006 | 0,003 | 1 |
| Gm47794   | 0,459942 | 0,002624 | 0,006 | 0,003 | 1 |
| AC061963. | 0,459942 | 0,002624 | 0,006 | 0,003 | 1 |
| Smad6     | 0,459942 | 0,002624 | 0,006 | 0,003 | 1 |
| Adora2b   | 0,459942 | 0,002624 | 0,006 | 0,003 | 1 |
| A730081D  | 0,459942 | 0,002624 | 0,006 | 0,003 | 1 |
| Stmnd1    | 0,459942 | 0,002624 | 0,006 | 0,003 | 1 |
| Grhl2     | 0,459942 | 0,002624 | 0,006 | 0,003 | 1 |
| Gm15738   | 0,459942 | 0,002624 | 0,006 | 0,003 | 1 |
| 1700022N  | 0,459942 | 0,002624 | 0,006 | 0,003 | 1 |
| G430049J  | 0,459942 | 0,002624 | 0,006 | 0,003 | 1 |
| Pcdha8    | 0,459942 | 0,002624 | 0,006 | 0,003 | 1 |
| Gm16105   | 0,460215 | 0,0049   | 0,006 | 0,003 | 1 |

|           |          |          |       |       |   |
|-----------|----------|----------|-------|-------|---|
| Pigh      | 0,460269 | -0,01392 | 0,154 | 0,167 | 1 |
| Rmnd1     | 0,460316 | -0,01371 | 0,281 | 0,299 | 1 |
| Pomt1     | 0,460364 | 0,017306 | 0,149 | 0,137 | 1 |
| Traip     | 0,460385 | 0,014183 | 0,018 | 0,013 | 1 |
| Sf3b3     | 0,460596 | -0,0094  | 0,489 | 0,499 | 1 |
| Jmjd8     | 0,460757 | -0,00757 | 0,155 | 0,169 | 1 |
| Ccne1     | 0,46076  | 0,00231  | 0,006 | 0,003 | 1 |
| Mr1       | 0,460971 | 0,004277 | 0,02  | 0,015 | 1 |
| Txnip     | 0,460979 | 0,048129 | 0,447 | 0,437 | 1 |
| Dpysl4    | 0,461031 | 0,00198  | 0,006 | 0,003 | 1 |
| Eif4ebp1  | 0,461031 | 0,00198  | 0,006 | 0,003 | 1 |
| Colgalt2  | 0,461083 | 0,018751 | 0,057 | 0,049 | 1 |
| Tomm7     | 0,461094 | -0,01861 | 0,868 | 0,867 | 1 |
| Ngly1     | 0,46115  | 0,007058 | 0,303 | 0,283 | 1 |
| Kyat3     | 0,461225 | -0,00722 | 0,156 | 0,171 | 1 |
| Sap30l    | 0,461276 | -0,00843 | 0,391 | 0,408 | 1 |
| Zik1      | 0,461401 | -0,00985 | 0,047 | 0,055 | 1 |
| Cox18     | 0,461515 | -0,01447 | 0,144 | 0,158 | 1 |
| Ngef      | 0,461575 | 0,001005 | 0,006 | 0,003 | 1 |
| Postn     | 0,461575 | 0,001005 | 0,006 | 0,003 | 1 |
| Drd4      | 0,461575 | 0,001005 | 0,006 | 0,003 | 1 |
| 5830418P: | 0,461575 | 0,001005 | 0,006 | 0,003 | 1 |
| Gm12278   | 0,461575 | 0,001005 | 0,006 | 0,003 | 1 |
| 4930408O: | 0,461575 | 0,001005 | 0,006 | 0,003 | 1 |
| Gm26807   | 0,461575 | -0,00061 | 0,006 | 0,003 | 1 |
| Hist2h2be | 0,461598 | 0,008436 | 0,018 | 0,013 | 1 |
| Pdcd10    | 0,461703 | -0,00886 | 0,804 | 0,82  | 1 |
| Vdac1     | 0,46175  | -0,0168  | 0,674 | 0,685 | 1 |
| Rsph10b   | 0,461764 | 0,012754 | 0,041 | 0,034 | 1 |
| Kansl1l   | 0,461773 | 0,004567 | 0,342 | 0,369 | 1 |
| mt-Nd1    | 0,461821 | 0,031438 | 0,999 | 1     | 1 |
| Gtpbp2    | 0,461832 | -0,01379 | 0,365 | 0,382 | 1 |
| Hif1an    | 0,461844 | 0,016101 | 0,242 | 0,226 | 1 |
| Clock     | 0,46196  | 0,05202  | 0,71  | 0,727 | 1 |
| Mrm3      | 0,462107 | 0,012764 | 0,088 | 0,078 | 1 |
| Slc24a5   | 0,462152 | -0,02135 | 0,434 | 0,447 | 1 |
| Cdc23     | 0,462153 | -0,0137  | 0,295 | 0,312 | 1 |
| Tmem161a  | 0,462594 | -0,01922 | 0,427 | 0,444 | 1 |
| Mpst      | 0,462619 | -0,01657 | 0,699 | 0,733 | 1 |
| Lsm10     | 0,462642 | -0,01865 | 0,208 | 0,223 | 1 |
| Rflnb     | 0,462681 | -0,00562 | 0,015 | 0,02  | 1 |
| Mga       | 0,462712 | 0,034797 | 0,522 | 0,509 | 1 |
| Mamstr    | 0,462813 | 0,007475 | 0,018 | 0,013 | 1 |
| Gm26910   | 0,463227 | 0,012243 | 0,075 | 0,065 | 1 |
| Prkab2    | 0,463286 | 0,019477 | 0,071 | 0,062 | 1 |
| Lpcat4    | 0,463441 | -0,00751 | 0,103 | 0,115 | 1 |
| Lactb2    | 0,463551 | -0,00846 | 0,235 | 0,252 | 1 |
| Rcor2     | 0,463578 | 0,010022 | 0,018 | 0,013 | 1 |
| Gm13483   | 0,46358  | -0,00878 | 0,064 | 0,073 | 1 |
| Lman1     | 0,463591 | 0,036267 | 0,277 | 0,263 | 1 |
| Ap4m1     | 0,463673 | 0,007931 | 0,191 | 0,21  | 1 |
| Spa17     | 0,463842 | 0,011411 | 0,059 | 0,05  | 1 |

|            |          |          |       |       |   |
|------------|----------|----------|-------|-------|---|
| Fgfbp3     | 0,463848 | -0,00707 | 0,197 | 0,215 | 1 |
| Mmadhc     | 0,464083 | -0,00263 | 0,531 | 0,559 | 1 |
| Lad1       | 0,464191 | 0,007467 | 0,018 | 0,013 | 1 |
| Plekhj1    | 0,464289 | 0,043422 | 0,571 | 0,563 | 1 |
| Siah1a     | 0,46447  | -0,00671 | 0,391 | 0,416 | 1 |
| Tradd      | 0,464648 | -0,00248 | 0,27  | 0,291 | 1 |
| Smim8      | 0,464693 | -0,01729 | 0,312 | 0,33  | 1 |
| Ndufb3     | 0,464718 | -0,01099 | 0,836 | 0,855 | 1 |
| Gm2885     | 0,464974 | -0,01099 | 0,018 | 0,023 | 1 |
| Tinf2      | 0,465053 | -0,01487 | 0,131 | 0,143 | 1 |
| Cacnb1     | 0,465201 | -0,00199 | 0,056 | 0,065 | 1 |
| Msrp2      | 0,465358 | 0,015292 | 0,073 | 0,063 | 1 |
| Rnf113a1   | 0,465557 | 0,005871 | 0,018 | 0,013 | 1 |
| Sf3a3      | 0,465615 | 0,013354 | 0,401 | 0,382 | 1 |
| Casp9      | 0,465749 | -0,01528 | 0,208 | 0,223 | 1 |
| Cnot3      | 0,465822 | 0,030691 | 0,559 | 0,543 | 1 |
| Cobl       | 0,465827 | -0,00223 | 0,387 | 0,407 | 1 |
| Mtmr1      | 0,465864 | -0,02492 | 0,234 | 0,247 | 1 |
| Arrdc4     | 0,466355 | 0,008077 | 0,032 | 0,026 | 1 |
| A930024N   | 0,466476 | 0,010022 | 0,018 | 0,013 | 1 |
| Caprin2    | 0,466564 | 0,024547 | 0,086 | 0,076 | 1 |
| Mvd        | 0,466638 | 0,047755 | 0,273 | 0,26  | 1 |
| Bnip2      | 0,466708 | -0,01904 | 0,343 | 0,354 | 1 |
| Ric1       | 0,466897 | -0,02852 | 0,268 | 0,281 | 1 |
| Prorsd1    | 0,46697  | 0,010943 | 0,138 | 0,125 | 1 |
| Parp2      | 0,467067 | -0,00706 | 0,172 | 0,187 | 1 |
| B230322FC  | 0,467106 | -0,0051  | 0,008 | 0,011 | 1 |
| Olfr742    | 0,467106 | -0,0051  | 0,008 | 0,011 | 1 |
| Esyt3      | 0,467106 | -0,0051  | 0,008 | 0,011 | 1 |
| Lgi1       | 0,467106 | -0,0051  | 0,008 | 0,011 | 1 |
| Tead3      | 0,467106 | -0,00671 | 0,008 | 0,011 | 1 |
| Rps27l     | 0,46724  | 0,018907 | 0,751 | 0,725 | 1 |
| Gnl2       | 0,467288 | -0,01446 | 0,381 | 0,402 | 1 |
| Usp15      | 0,467668 | 0,039503 | 0,619 | 0,62  | 1 |
| St6galnac3 | 0,467878 | 0,042373 | 0,756 | 0,753 | 1 |
| Nfrkb      | 0,467906 | 0,001315 | 0,276 | 0,298 | 1 |
| Gm10282    | 0,467999 | 0,003946 | 0,018 | 0,013 | 1 |
| Siah1b     | 0,468046 | -0,01536 | 0,049 | 0,057 | 1 |
| Cyp4f13    | 0,468154 | -0,02379 | 0,275 | 0,286 | 1 |
| Stmn4      | 0,468251 | 0,011873 | 0,999 | 1     | 1 |
| Trappc4    | 0,468291 | -0,01908 | 0,725 | 0,748 | 1 |
| Olfr1369-p | 0,468312 | -0,05122 | 0,018 | 0,013 | 1 |
| Rnf220     | 0,468401 | 0,02732  | 0,78  | 0,769 | 1 |
| Rps15      | 0,468407 | 0,03488  | 0,996 | 0,997 | 1 |
| Mirt1      | 0,468412 | -0,00963 | 0,004 | 0,007 | 1 |
| Acp6       | 0,468462 | -0,01087 | 0,138 | 0,151 | 1 |
| Txn1l      | 0,468489 | 0,02403  | 0,818 | 0,81  | 1 |
| Pms2       | 0,468533 | 0,008458 | 0,214 | 0,197 | 1 |
| Bcl6       | 0,468624 | 0,016342 | 0,205 | 0,19  | 1 |
| Tmem35a    | 0,468686 | -0,00418 | 0,004 | 0,007 | 1 |
| Olfr77     | 0,468686 | -0,00418 | 0,004 | 0,007 | 1 |
| Gm9796     | 0,468686 | -0,00418 | 0,004 | 0,007 | 1 |

|            |          |          |       |       |   |
|------------|----------|----------|-------|-------|---|
| Tcap       | 0,468686 | -0,00418 | 0,004 | 0,007 | 1 |
| Pla2g4c    | 0,468687 | -0,00481 | 0,004 | 0,007 | 1 |
| Jph3       | 0,468712 | -0,0035  | 0,008 | 0,011 | 1 |
| Tll2       | 0,468712 | -0,0035  | 0,008 | 0,011 | 1 |
| Hsbp1      | 0,468751 | 0,023435 | 0,984 | 0,976 | 1 |
| Fnip2      | 0,468843 | 0,023798 | 0,237 | 0,223 | 1 |
| Zfp341     | 0,468984 | -0,0053  | 0,044 | 0,052 | 1 |
| Tmem214    | 0,469019 | 0,032372 | 0,314 | 0,298 | 1 |
| Frmd5      | 0,469072 | 0,039836 | 0,723 | 0,733 | 1 |
| Dnah8      | 0,469124 | -0,00085 | 0,015 | 0,02  | 1 |
| Fam76a     | 0,469252 | 0,02489  | 0,704 | 0,702 | 1 |
| Znrd1      | 0,469447 | 0,025473 | 0,37  | 0,356 | 1 |
| Bdnf       | 0,469511 | -0,00481 | 0,004 | 0,007 | 1 |
| Myh10      | 0,469519 | -0,00476 | 0,008 | 0,011 | 1 |
| Ikbkap     | 0,469622 | -0,00619 | 0,208 | 0,224 | 1 |
| Gm36757    | 0,469706 | -0,01215 | 0,064 | 0,073 | 1 |
| Cnot8      | 0,46973  | 0,012046 | 0,347 | 0,379 | 1 |
| Ctxn2      | 0,469785 | -0,00257 | 0,004 | 0,007 | 1 |
| Gm14597    | 0,469785 | -0,00257 | 0,004 | 0,007 | 1 |
| Mycl       | 0,469785 | -0,00257 | 0,004 | 0,007 | 1 |
| Map4k1     | 0,469785 | -0,00257 | 0,004 | 0,007 | 1 |
| Nphs1      | 0,469785 | -0,00257 | 0,004 | 0,007 | 1 |
| Zfp977     | 0,469785 | -0,00257 | 0,004 | 0,007 | 1 |
| Rsf1os1    | 0,469785 | -0,00257 | 0,004 | 0,007 | 1 |
| Olfr691    | 0,469785 | -0,00257 | 0,004 | 0,007 | 1 |
| Gm10131    | 0,469785 | -0,00257 | 0,004 | 0,007 | 1 |
| C130073E2  | 0,469785 | -0,00257 | 0,004 | 0,007 | 1 |
| Gm45639    | 0,469785 | -0,00257 | 0,004 | 0,007 | 1 |
| Gm48940    | 0,469785 | -0,00257 | 0,004 | 0,007 | 1 |
| Gm36278    | 0,469785 | -0,00257 | 0,004 | 0,007 | 1 |
| A730085K   | 0,469785 | -0,00257 | 0,004 | 0,007 | 1 |
| Nxn        | 0,469785 | -0,00257 | 0,004 | 0,007 | 1 |
| Rab11fip4c | 0,469785 | -0,00257 | 0,004 | 0,007 | 1 |
| Gm20319    | 0,469785 | -0,00257 | 0,004 | 0,007 | 1 |
| Rit2       | 0,469785 | -0,00257 | 0,004 | 0,007 | 1 |
| A330009N   | 0,469786 | -0,0032  | 0,004 | 0,007 | 1 |
| Hectd2     | 0,469786 | -0,0032  | 0,004 | 0,007 | 1 |
| Gm26792    | 0,469786 | -0,00384 | 0,004 | 0,007 | 1 |
| Ttc25      | 0,469934 | -0,00667 | 0,047 | 0,055 | 1 |
| Tmem245    | 0,469963 | 0,039364 | 0,679 | 0,673 | 1 |
| Dcun1d3    | 0,469966 | -0,00213 | 0,179 | 0,197 | 1 |
| E130102H   | 0,469989 | -0,01106 | 0,248 | 0,267 | 1 |
| Sdc1       | 0,470114 | 0,039366 | 0,039 | 0,033 | 1 |
| Slc6a20b   | 0,470121 | 0,00039  | 0,008 | 0,011 | 1 |
| Gm13528    | 0,470121 | -0,00252 | 0,008 | 0,011 | 1 |
| Cdyl2      | 0,470121 | -0,00252 | 0,008 | 0,011 | 1 |
| Gm40557    | 0,470121 | -0,00252 | 0,008 | 0,011 | 1 |
| Gusb       | 0,470288 | 0,016417 | 0,275 | 0,26  | 1 |
| Frat1      | 0,470394 | 0,016437 | 0,078 | 0,068 | 1 |
| 1300002E1  | 0,470401 | -0,01199 | 0,22  | 0,236 | 1 |
| Ube2i      | 0,470577 | 0,015709 | 0,631 | 0,62  | 1 |
| 9930111J2  | 0,470612 | -0,00413 | 0,004 | 0,007 | 1 |



|           |          |          |       |       |   |
|-----------|----------|----------|-------|-------|---|
| Zfp948    | 0,470613 | 0,026479 | 0,174 | 0,163 | 1 |
| Dcaf1     | 0,470706 | 0,013608 | 0,274 | 0,257 | 1 |
| Mrnip     | 0,470867 | 0,000401 | 0,062 | 0,072 | 1 |
| Cacna1e   | 0,470886 | -0,00159 | 0,004 | 0,007 | 1 |
| Lpar3     | 0,470886 | -0,00159 | 0,004 | 0,007 | 1 |
| Ankrd6    | 0,470886 | -0,00159 | 0,004 | 0,007 | 1 |
| Gm47113   | 0,470886 | -0,00159 | 0,004 | 0,007 | 1 |
| Gria1     | 0,470886 | -0,00159 | 0,004 | 0,007 | 1 |
| Gm12264   | 0,470886 | -0,00159 | 0,004 | 0,007 | 1 |
| C130060C  | 0,470886 | -0,00159 | 0,004 | 0,007 | 1 |
| Svep1     | 0,470887 | -0,00223 | 0,004 | 0,007 | 1 |
| I830134HC | 0,470887 | -0,00223 | 0,004 | 0,007 | 1 |
| AI854703  | 0,471162 | -0,00125 | 0,004 | 0,007 | 1 |
| Hoxd9     | 0,471189 | -0,01748 | 0,109 | 0,12  | 1 |
| Vps9d1    | 0,471222 | 0,001591 | 0,275 | 0,296 | 1 |
| Gm26759   | 0,47127  | -0,00092 | 0,047 | 0,055 | 1 |
| Gpatch8   | 0,471475 | -0,00656 | 0,889 | 0,906 | 1 |
| Acd       | 0,471475 | -0,02603 | 0,156 | 0,167 | 1 |
| Cep55     | 0,471533 | -0,00155 | 0,008 | 0,011 | 1 |
| Osgepl1   | 0,471541 | -0,01735 | 0,142 | 0,154 | 1 |
| Idh3a     | 0,471565 | -0,00982 | 0,435 | 0,462 | 1 |
| Nbea      | 0,471584 | -0,0141  | 0,644 | 0,66  | 1 |
| Zdhhc9    | 0,471676 | 0,032888 | 0,697 | 0,702 | 1 |
| Eloc      | 0,47168  | -0,0081  | 0,839 | 0,859 | 1 |
| Timp3     | 0,471705 | -0,02823 | 0,052 | 0,06  | 1 |
| Nol6      | 0,47172  | 2,6E-05  | 0,189 | 0,207 | 1 |
| Pex11a    | 0,47182  | 0,011262 | 0,081 | 0,072 | 1 |
| T2        | 0,471864 | 0,008436 | 0,016 | 0,011 | 1 |
| Fnbp1l    | 0,471867 | 0,007792 | 0,016 | 0,011 | 1 |
| Gm6563    | 0,471907 | 0,009035 | 0,03  | 0,024 | 1 |
| Pcdhb16   | 0,471912 | -0,0074  | 0,094 | 0,106 | 1 |
| Nusap1    | 0,471989 | -0,00061 | 0,004 | 0,007 | 1 |
| Gm16302   | 0,471989 | 0,000363 | 0,004 | 0,007 | 1 |
| Gm5617    | 0,471995 | -0,00385 | 0,249 | 0,268 | 1 |
| Tctn3     | 0,472054 | 0,012955 | 0,057 | 0,049 | 1 |
| Dusp8     | 0,472137 | 0,017531 | 0,406 | 0,389 | 1 |
| Rnf144a   | 0,472285 | -0,01151 | 0,326 | 0,345 | 1 |
| Plekhg5   | 0,472358 | 0,003632 | 0,016 | 0,011 | 1 |
| Abcb9     | 0,472366 | 0,005005 | 0,117 | 0,104 | 1 |
| BC031181  | 0,472373 | -0,01324 | 0,913 | 0,935 | 1 |
| Dzip3     | 0,472448 | -0,00867 | 0,242 | 0,262 | 1 |
| Uvrag     | 0,47275  | 0,000999 | 0,257 | 0,276 | 1 |
| Fam109a   | 0,472823 | -0,00763 | 0,099 | 0,111 | 1 |
| Podxl     | 0,472946 | -0,00058 | 0,008 | 0,011 | 1 |
| Gm12355   | 0,472946 | -0,00058 | 0,008 | 0,011 | 1 |
| Gm20604   | 0,472956 | 0,005871 | 0,052 | 0,044 | 1 |
| Calm2     | 0,473064 | 0,033927 | 0,995 | 0,995 | 1 |
| Noc3l     | 0,473098 | -0,01067 | 0,189 | 0,205 | 1 |
| Mapkapk2  | 0,473166 | -0,01073 | 0,367 | 0,389 | 1 |
| Acat3     | 0,473268 | -0,00403 | 0,018 | 0,023 | 1 |
| Ucn2      | 0,473318 | 0,067979 | 0,008 | 0,005 | 1 |
| Dnajc17   | 0,473792 | -0,01593 | 0,245 | 0,26  | 1 |

|           |          |          |       |       |   |
|-----------|----------|----------|-------|-------|---|
| Saysd1    | 0,473886 | -0,01117 | 0,24  | 0,257 | 1 |
| Fmo5      | 0,474066 | 0,004656 | 0,059 | 0,068 | 1 |
| Cdc42bpg  | 0,474183 | 0,007801 | 0,014 | 0,01  | 1 |
| Gm42670   | 0,474186 | 0,010042 | 0,014 | 0,01  | 1 |
| Gm36356   | 0,474231 | -0,01713 | 0,09  | 0,101 | 1 |
| Ebag9     | 0,474295 | -0,00776 | 0,235 | 0,252 | 1 |
| Zbtb8a    | 0,474315 | 0,004586 | 0,016 | 0,011 | 1 |
| Tceal1    | 0,474612 | 0,001284 | 0,315 | 0,34  | 1 |
| Gsap      | 0,474733 | 0,007811 | 0,008 | 0,005 | 1 |
| Gm26582   | 0,474733 | 0,008779 | 0,008 | 0,005 | 1 |
| Gm5535    | 0,474807 | -0,00532 | 0,067 | 0,076 | 1 |
| Nek4      | 0,474955 | 0,008786 | 0,251 | 0,273 | 1 |
| AC154507. | 0,47522  | -0,00307 | 0,018 | 0,023 | 1 |
| Gm43254   | 0,475236 | 0,006837 | 0,014 | 0,01  | 1 |
| Cct6b     | 0,475414 | 0,008119 | 0,014 | 0,01  | 1 |
| Chchd5    | 0,475439 | -0,00623 | 0,232 | 0,247 | 1 |
| Wwc1      | 0,475441 | 0,0049   | 0,008 | 0,005 | 1 |
| Syt16     | 0,475441 | 0,0049   | 0,008 | 0,005 | 1 |
| Alg5      | 0,475545 | 0,034794 | 0,362 | 0,353 | 1 |
| Rab29     | 0,475718 | -0,00712 | 0,041 | 0,049 | 1 |
| Tnfrsf22  | 0,475748 | 0,004604 | 0,03  | 0,024 | 1 |
| Rabgef1   | 0,475946 | -0,00869 | 0,202 | 0,22  | 1 |
| Nrip2     | 0,475984 | -0,00831 | 0,029 | 0,036 | 1 |
| Nbeal2    | 0,476147 | -0,00591 | 0,021 | 0,026 | 1 |
| Gm2447    | 0,476149 | 0,005871 | 0,008 | 0,005 | 1 |
| Olfr1307  | 0,476149 | 0,003927 | 0,008 | 0,005 | 1 |
| Ppp1r27   | 0,476149 | 0,003927 | 0,008 | 0,005 | 1 |
| Napa      | 0,476203 | -0,00366 | 0,892 | 0,911 | 1 |
| Cttnbp2   | 0,476245 | -0,03197 | 0,686 | 0,689 | 1 |
| Xk        | 0,476277 | -0,00495 | 0,021 | 0,026 | 1 |
| Slco2a1   | 0,476289 | 0,007801 | 0,014 | 0,01  | 1 |
| Ccdc149   | 0,476289 | 0,005871 | 0,014 | 0,01  | 1 |
| Vegfd     | 0,476858 | 0,002954 | 0,008 | 0,005 | 1 |
| Lgals7    | 0,476858 | 0,002954 | 0,008 | 0,005 | 1 |
| Gm27030   | 0,476858 | 0,002954 | 0,008 | 0,005 | 1 |
| Gng2      | 0,476858 | 0,002954 | 0,008 | 0,005 | 1 |
| Cd300a    | 0,476858 | 0,002954 | 0,008 | 0,005 | 1 |
| Foxc1     | 0,476858 | 0,002954 | 0,008 | 0,005 | 1 |
| Eif4e3    | 0,476921 | -0,04568 | 0,219 | 0,231 | 1 |
| Caap1     | 0,476929 | -0,00699 | 0,238 | 0,255 | 1 |
| Cenpa     | 0,476933 | -0,00563 | 0,041 | 0,049 | 1 |
| Braf      | 0,477035 | -0,01885 | 0,415 | 0,433 | 1 |
| Gm37584   | 0,477097 | 0,004254 | 0,008 | 0,005 | 1 |
| Sox6      | 0,477147 | 0,008448 | 0,012 | 0,008 | 1 |
| Lipt1     | 0,477176 | -0,00211 | 0,018 | 0,023 | 1 |
| Tnr       | 0,477176 | -0,00019 | 0,018 | 0,023 | 1 |
| Cbr4      | 0,477223 | -0,00772 | 0,131 | 0,143 | 1 |
| Gm14327   | 0,477344 | 0,004904 | 0,014 | 0,01  | 1 |
| Gm17227   | 0,477344 | 0,004904 | 0,014 | 0,01  | 1 |
| B930036N  | 0,47745  | -0,0176  | 0,054 | 0,046 | 1 |
| Tnip1     | 0,477503 | -0,01579 | 0,28  | 0,294 | 1 |
| Slc2a3    | 0,477545 | -0,00574 | 0,029 | 0,036 | 1 |

|           |          |          |       |       |   |
|-----------|----------|----------|-------|-------|---|
| Dynlt3    | 0,477556 | -0,01886 | 0,615 | 0,637 | 1 |
| Agpat1    | 0,477641 | 0,017334 | 0,329 | 0,314 | 1 |
| Orc2      | 0,477698 | 0,013251 | 0,269 | 0,252 | 1 |
| Rinl      | 0,477735 | 0,03761  | 0,1   | 0,091 | 1 |
| Polb      | 0,477778 | -0,01982 | 0,596 | 0,611 | 1 |
| Gm44702   | 0,478044 | 0,00231  | 0,008 | 0,005 | 1 |
| B130006Dl | 0,478149 | -0,00409 | 0,041 | 0,049 | 1 |
| Wrnip1    | 0,478154 | 0,020216 | 0,249 | 0,236 | 1 |
| Cebpa     | 0,478281 | 0,000696 | 0,008 | 0,005 | 1 |
| Pomk      | 0,478299 | -0,00789 | 0,093 | 0,104 | 1 |
| 1700086Pc | 0,478399 | 0,003937 | 0,014 | 0,01  | 1 |
| Adck2     | 0,478436 | -0,00986 | 0,176 | 0,19  | 1 |
| Mtmr12    | 0,47851  | -0,01137 | 0,109 | 0,12  | 1 |
| Ttbk1     | 0,478666 | 0,003925 | 0,266 | 0,288 | 1 |
| Rxrb      | 0,478696 | -0,01452 | 0,466 | 0,489 | 1 |
| Ankrd35   | 0,478754 | 0,001337 | 0,008 | 0,005 | 1 |
| Gm44739   | 0,478754 | 0,001337 | 0,008 | 0,005 | 1 |
| Duxbl1    | 0,478754 | 0,001337 | 0,008 | 0,005 | 1 |
| Gm45606   | 0,478754 | 0,001337 | 0,008 | 0,005 | 1 |
| Sdad1     | 0,478772 | 0,023627 | 0,19  | 0,177 | 1 |
| Sipa1     | 0,47887  | 0,017105 | 0,062 | 0,054 | 1 |
| Gng5      | 0,479013 | 0,037349 | 0,901 | 0,898 | 1 |
| Chmp3     | 0,479019 | 0,018264 | 0,607 | 0,605 | 1 |
| Pip5k1a   | 0,479358 | -0,00622 | 0,275 | 0,293 | 1 |
| Elf4      | 0,479398 | 0,00524  | 0,03  | 0,024 | 1 |
| Tnfsf11   | 0,479468 | -0,00025 | 0,008 | 0,005 | 1 |
| Ssna1     | 0,479485 | 0,025801 | 0,665 | 0,657 | 1 |
| Foxj3     | 0,479508 | 0,041654 | 0,265 | 0,255 | 1 |
| Wdr27     | 0,479511 | -0,01265 | 0,06  | 0,068 | 1 |
| Adamtsl3  | 0,479563 | 0,018017 | 0,084 | 0,075 | 1 |
| Runx2os1  | 0,479738 | 0,010062 | 0,01  | 0,007 | 1 |
| Gm13620   | 0,479738 | 0,00813  | 0,01  | 0,007 | 1 |
| 9430038l0 | 0,479773 | -0,01152 | 0,101 | 0,112 | 1 |
| B130046B: | 0,479814 | 0,003295 | 0,014 | 0,01  | 1 |
| Akap5     | 0,479942 | -0,00379 | 0,008 | 0,005 | 1 |
| 4930469K: | 0,480011 | 0,005548 | 0,012 | 0,008 | 1 |
| Rbx1      | 0,480067 | -0,01853 | 0,945 | 0,963 | 1 |
| Patj      | 0,480205 | 0,006837 | 0,012 | 0,008 | 1 |
| Inpp5b    | 0,480259 | -0,00914 | 0,188 | 0,203 | 1 |
| Psenen    | 0,480367 | -0,01506 | 0,933 | 0,953 | 1 |
| Irf2bpl   | 0,4805   | 0,032336 | 0,288 | 0,276 | 1 |
| Uchl4     | 0,48058  | 0,005224 | 0,01  | 0,007 | 1 |
| Id1       | 0,480593 | -0,00546 | 0,026 | 0,033 | 1 |
| Rbm43     | 0,480607 | -0,00299 | 0,024 | 0,029 | 1 |
| Chac2     | 0,480702 | -0,00055 | 0,178 | 0,193 | 1 |
| 4930589L: | 0,48078  | 0,008436 | 0,012 | 0,008 | 1 |
| Spint2    | 0,480873 | 0,002328 | 0,014 | 0,01  | 1 |
| Gm11696   | 0,480967 | 0,00458  | 0,012 | 0,008 | 1 |
| Pgf       | 0,480967 | 0,00458  | 0,012 | 0,008 | 1 |
| F8        | 0,481002 | -0,0156  | 0,074 | 0,083 | 1 |
| Pls3      | 0,481224 | 0,021693 | 0,488 | 0,476 | 1 |
| Mxd3      | 0,481231 | 0,001381 | 0,014 | 0,01  | 1 |

|           |          |          |       |       |   |
|-----------|----------|----------|-------|-------|---|
| Sf3a1     | 0,48127  | -0,00522 | 0,339 | 0,358 | 1 |
| Dstn      | 0,481408 | -0,00664 | 0,994 | 0,992 | 1 |
| BC030343  | 0,481423 | 0,005224 | 0,01  | 0,007 | 1 |
| 9030612E  | 0,481423 | 0,004254 | 0,01  | 0,007 | 1 |
| Klf12     | 0,481423 | 0,004254 | 0,01  | 0,007 | 1 |
| Stradb    | 0,481468 | -0,01713 | 0,144 | 0,156 | 1 |
| Gm29237   | 0,481636 | 0,006516 | 0,01  | 0,007 | 1 |
| Insl6     | 0,481636 | 0,005548 | 0,01  | 0,007 | 1 |
| Ptpn3     | 0,481848 | 0,005871 | 0,01  | 0,007 | 1 |
| Mettl15   | 0,481884 | -0,00935 | 0,144 | 0,158 | 1 |
| Adam32    | 0,481925 | 0,00361  | 0,012 | 0,008 | 1 |
| Pik3r3    | 0,481941 | 0,026313 | 0,285 | 0,309 | 1 |
| Lactb     | 0,482049 | -0,00653 | 0,184 | 0,2   | 1 |
| Fbxo46    | 0,482067 | 0,016998 | 0,159 | 0,146 | 1 |
| Dnajb3    | 0,482088 | -0,00551 | 0,026 | 0,033 | 1 |
| 1700015F1 | 0,482267 | 0,003283 | 0,01  | 0,007 | 1 |
| Syngap1   | 0,482267 | 0,003283 | 0,01  | 0,007 | 1 |
| Brat1     | 0,482315 | 0,018743 | 0,193 | 0,18  | 1 |
| Phf23     | 0,482467 | -0,00752 | 0,285 | 0,302 | 1 |
| Cdv3      | 0,482469 | 0,013751 | 0,773 | 0,759 | 1 |
| Wdr12     | 0,482654 | 0,013525 | 0,285 | 0,265 | 1 |
| Hk2       | 0,482686 | -0,00451 | 0,026 | 0,033 | 1 |
| Myl6      | 0,482708 | 0,015373 | 0,99  | 0,993 | 1 |
| Uqcr11    | 0,48281  | -0,00906 | 0,96  | 0,976 | 1 |
| Gm7292    | 0,482918 | -0,00513 | 0,032 | 0,039 | 1 |
| Gm16316   | 0,483066 | -0,0024  | 0,021 | 0,026 | 1 |
| Mettl2    | 0,483256 | 0,006936 | 0,182 | 0,2   | 1 |
| Cenpl     | 0,483305 | -0,0016  | 0,038 | 0,046 | 1 |
| Bclaf3    | 0,483459 | 0,036534 | 0,291 | 0,28  | 1 |
| Rbm33     | 0,483528 | -0,0064  | 0,392 | 0,415 | 1 |
| Nfkbib    | 0,483547 | -0,02053 | 0,296 | 0,311 | 1 |
| Dym       | 0,483622 | -0,02097 | 0,234 | 0,247 | 1 |
| Kcnb1     | 0,483658 | 0,003295 | 0,012 | 0,008 | 1 |
| Ssh1      | 0,483715 | 0,002901 | 0,16  | 0,176 | 1 |
| Trpv3     | 0,483945 | -0,00445 | 0,058 | 0,067 | 1 |
| Rnpc3     | 0,483969 | 0,04187  | 0,499 | 0,501 | 1 |
| Cops9     | 0,484022 | 0,01713  | 0,915 | 0,928 | 1 |
| Selenoo   | 0,484035 | -0,01813 | 0,314 | 0,332 | 1 |
| Rabl2     | 0,484161 | -0,00165 | 0,108 | 0,12  | 1 |
| Rbm3os    | 0,484231 | 0,001999 | 0,012 | 0,008 | 1 |
| Slc45a3   | 0,484249 | -0,01116 | 0,241 | 0,259 | 1 |
| Arl8b     | 0,484256 | -0,0174  | 0,792 | 0,818 | 1 |
| Sfmbt1    | 0,484337 | 0,015989 | 0,148 | 0,137 | 1 |
| Tarsl2    | 0,484369 | -0,01094 | 0,319 | 0,335 | 1 |
| Cenpi     | 0,484383 | 0,001668 | 0,01  | 0,007 | 1 |
| Pm20d2    | 0,484383 | 0,001668 | 0,01  | 0,007 | 1 |
| Gm20163   | 0,484383 | 0,001668 | 0,01  | 0,007 | 1 |
| Tbc1d8    | 0,484383 | 5,69E-05 | 0,01  | 0,007 | 1 |
| Mapkbp1   | 0,48442  | 0,000806 | 0,085 | 0,075 | 1 |
| Chd4      | 0,484456 | -0,00301 | 0,897 | 0,919 | 1 |
| Wbp1      | 0,484702 | -0,00615 | 0,368 | 0,392 | 1 |
| Meis2     | 0,484867 | -0,00721 | 0,232 | 0,246 | 1 |

|           |          |          |       |       |   |
|-----------|----------|----------|-------|-------|---|
| Prmt6     | 0,484983 | 0,010815 | 0,114 | 0,102 | 1 |
| Eml3      | 0,484989 | -0,00062 | 0,2   | 0,218 | 1 |
| Scaper    | 0,485003 | 0,042647 | 0,371 | 0,363 | 1 |
| Zbtb17    | 0,485052 | 0,016075 | 0,14  | 0,128 | 1 |
| Tbc1d9b   | 0,485183 | -0,0017  | 0,357 | 0,379 | 1 |
| Mtbp      | 0,485295 | -0,01808 | 0,071 | 0,08  | 1 |
| Gm12530   | 0,485301 | 0,013876 | 0,055 | 0,047 | 1 |
| 2310039H  | 0,485343 | -0,00495 | 0,169 | 0,184 | 1 |
| Ulk3      | 0,485708 | -0,00168 | 0,105 | 0,117 | 1 |
| Zfhx2os   | 0,485766 | -0,00077 | 0,067 | 0,076 | 1 |
| Aldh2     | 0,485844 | -0,01037 | 0,273 | 0,293 | 1 |
| Polm      | 0,485937 | 0,001936 | 0,073 | 0,063 | 1 |
| Selenos   | 0,486132 | -0,00684 | 0,917 | 0,935 | 1 |
| Cadm4     | 0,486152 | 0,004041 | 0,996 | 0,995 | 1 |
| Nnt       | 0,486232 | 0,007138 | 0,028 | 0,023 | 1 |
| Tmem100   | 0,486504 | 5,69E-05 | 0,01  | 0,007 | 1 |
| Nckipsd   | 0,486556 | -0,0091  | 0,077 | 0,086 | 1 |
| Rpain     | 0,486665 | 0,027242 | 0,253 | 0,241 | 1 |
| Ccdc97    | 0,487035 | -0,0114  | 0,207 | 0,221 | 1 |
| Hras      | 0,487175 | -0,0267  | 0,544 | 0,55  | 1 |
| E130311K1 | 0,487293 | -0,0089  | 0,09  | 0,101 | 1 |
| Sec14l2   | 0,487305 | -0,00947 | 0,205 | 0,221 | 1 |
| Mlf2      | 0,4875   | -0,01277 | 0,974 | 0,982 | 1 |
| Alas1     | 0,487933 | 0,017279 | 0,227 | 0,213 | 1 |
| Ganab     | 0,488381 | 0,004747 | 0,469 | 0,502 | 1 |
| C030029H  | 0,488524 | -0,0383  | 0,616 | 0,608 | 1 |
| Lix1l     | 0,488684 | 0,019058 | 0,099 | 0,089 | 1 |
| Ube2g2    | 0,488703 | -0,0166  | 0,244 | 0,259 | 1 |
| Ldlrap1   | 0,488719 | -0,02864 | 0,386 | 0,405 | 1 |
| Ptcd1     | 0,488828 | -0,00636 | 0,146 | 0,159 | 1 |
| Gdi1      | 0,488878 | 0,009662 | 0,919 | 0,904 | 1 |
| Cds1      | 0,489213 | 0,024472 | 0,167 | 0,156 | 1 |
| Phf8      | 0,489324 | -0,0028  | 0,274 | 0,293 | 1 |
| Saa3      | 0,489662 | 0,005554 | 0,028 | 0,023 | 1 |
| Gm12089   | 0,489662 | 0,005554 | 0,028 | 0,023 | 1 |
| Supv3l1   | 0,489815 | 0,01774  | 0,094 | 0,085 | 1 |
| Stat2     | 0,489948 | 0,027226 | 0,271 | 0,26  | 1 |
| Mlf1      | 0,49003  | 0,005871 | 0,028 | 0,023 | 1 |
| Fkbp2     | 0,490144 | 0,036005 | 0,818 | 0,829 | 1 |
| Ankrd13a  | 0,490264 | 0,039136 | 0,782 | 0,789 | 1 |
| Orc3      | 0,4904   | -0,0149  | 0,178 | 0,192 | 1 |
| Mms22l    | 0,490474 | -0,00699 | 0,011 | 0,015 | 1 |
| Rimklb    | 0,490474 | -0,00699 | 0,011 | 0,015 | 1 |
| Jpt1      | 0,490506 | -0,00638 | 0,093 | 0,104 | 1 |
| Gm11273   | 0,490531 | -0,00992 | 0,043 | 0,05  | 1 |
| 5730409E  | 0,490617 | -0,00422 | 0,175 | 0,19  | 1 |
| Secisbp2  | 0,490661 | 0,029432 | 0,364 | 0,35  | 1 |
| Ebpl      | 0,49072  | 0,037876 | 0,587 | 0,582 | 1 |
| Ldhd      | 0,490976 | 0,007018 | 0,121 | 0,109 | 1 |
| Rps20     | 0,491275 | 0,02127  | 0,982 | 0,977 | 1 |
| Ggact     | 0,491332 | -0,01394 | 0,142 | 0,154 | 1 |
| Gmeb1     | 0,491453 | -0,01455 | 0,171 | 0,184 | 1 |

|           |          |          |       |       |   |
|-----------|----------|----------|-------|-------|---|
| 2410015M  | 0,491562 | -0,01454 | 0,813 | 0,826 | 1 |
| Arl4a     | 0,491868 | -0,00072 | 0,183 | 0,198 | 1 |
| Zscan25   | 0,492086 | -0,00602 | 0,011 | 0,015 | 1 |
| Emp1      | 0,49216  | 0,047814 | 0,026 | 0,021 | 1 |
| Cd44      | 0,492322 | 0,036903 | 0,095 | 0,086 | 1 |
| Snhg12    | 0,492423 | 0,028899 | 0,467 | 0,47  | 1 |
| Gm19935   | 0,492441 | -0,00539 | 0,011 | 0,015 | 1 |
| Itpk1     | 0,492549 | 0,032411 | 0,888 | 0,886 | 1 |
| Enkd1     | 0,492581 | 0,002746 | 0,035 | 0,042 | 1 |
| Prr3      | 0,492919 | -0,01126 | 0,216 | 0,231 | 1 |
| Psrc1     | 0,492977 | 0,004923 | 0,024 | 0,029 | 1 |
| Zc3h12a   | 0,493043 | -0,00238 | 0,059 | 0,05  | 1 |
| Mtcl1     | 0,493236 | -0,01165 | 0,153 | 0,166 | 1 |
| Dhx37     | 0,493347 | 0,017986 | 0,16  | 0,148 | 1 |
| Donson    | 0,493439 | -0,00436 | 0,066 | 0,075 | 1 |
| Gm26809   | 0,493877 | -0,00602 | 0,011 | 0,015 | 1 |
| Fam199x   | 0,493896 | 0,019196 | 0,256 | 0,242 | 1 |
| Gm15965   | 0,494056 | -0,00442 | 0,011 | 0,015 | 1 |
| Brix1     | 0,494137 | -0,00565 | 0,348 | 0,369 | 1 |
| Tmtc3     | 0,494221 | -0,01716 | 0,154 | 0,166 | 1 |
| Smtn      | 0,494448 | 0,020874 | 0,086 | 0,098 | 1 |
| Dhx40     | 0,494522 | -0,01073 | 0,435 | 0,45  | 1 |
| Bora      | 0,494889 | -0,00468 | 0,069 | 0,078 | 1 |
| Afg1l     | 0,494928 | -0,00564 | 0,066 | 0,075 | 1 |
| Ppa2      | 0,495073 | 0,028092 | 0,365 | 0,346 | 1 |
| Wdr44     | 0,495111 | 0,002293 | 0,218 | 0,236 | 1 |
| Trib1     | 0,495139 | 0,05031  | 0,087 | 0,078 | 1 |
| Nars      | 0,495168 | -0,00032 | 0,718 | 0,751 | 1 |
| Mdp1      | 0,495254 | -0,00653 | 0,377 | 0,4   | 1 |
| Plpbp     | 0,495438 | 0,027249 | 0,572 | 0,558 | 1 |
| Rhog      | 0,49554  | 0,019877 | 0,982 | 0,995 | 1 |
| 6430550D  | 0,49558  | 0,008411 | 0,026 | 0,021 | 1 |
| Ptprm     | 0,495622 | 0,000451 | 0,196 | 0,213 | 1 |
| Kiss1r    | 0,495673 | -0,00345 | 0,011 | 0,015 | 1 |
| Cers1     | 0,495673 | -0,00345 | 0,011 | 0,015 | 1 |
| Gm45353   | 0,495673 | -0,00345 | 0,011 | 0,015 | 1 |
| Meis3     | 0,495708 | 0,007459 | 0,026 | 0,021 | 1 |
| Exosc5    | 0,495765 | -0,01512 | 0,35  | 0,366 | 1 |
| Uqcrb     | 0,496011 | -0,0099  | 0,831 | 0,844 | 1 |
| Gm12204   | 0,49603  | -0,00282 | 0,011 | 0,015 | 1 |
| Igip      | 0,496407 | -0,00816 | 0,385 | 0,402 | 1 |
| Txndc5    | 0,496612 | 0,006755 | 0,1   | 0,089 | 1 |
| Snapc1    | 0,496644 | 0,011919 | 0,401 | 0,387 | 1 |
| Ndufv3    | 0,496733 | -0,00702 | 0,793 | 0,785 | 1 |
| Vav3      | 0,496757 | -0,00307 | 0,011 | 0,015 | 1 |
| Tceal3    | 0,496816 | 0,016089 | 0,171 | 0,158 | 1 |
| 1700020I1 | 0,496909 | 0,033105 | 0,609 | 0,602 | 1 |
| Zfp108    | 0,496972 | 0,010599 | 0,035 | 0,029 | 1 |
| R3hdm2    | 0,497168 | -0,01367 | 0,604 | 0,61  | 1 |
| Gnl3l     | 0,497251 | -0,00747 | 0,54  | 0,556 | 1 |
| Ezh1      | 0,497412 | -0,01849 | 0,504 | 0,525 | 1 |
| Dcp1b     | 0,497511 | -0,00951 | 0,218 | 0,234 | 1 |

|           |          |          |       |       |   |
|-----------|----------|----------|-------|-------|---|
| Gm13199   | 0,497651 | -0,00185 | 0,011 | 0,015 | 1 |
| Gstt2     | 0,497651 | -0,00185 | 0,011 | 0,015 | 1 |
| Tep1      | 0,497941 | 0,010266 | 0,089 | 0,101 | 1 |
| Arl1      | 0,497975 | 0,032197 | 0,744 | 0,756 | 1 |
| Pkig      | 0,498021 | -0,00826 | 0,273 | 0,291 | 1 |
| Nop53     | 0,498369 | 0,025475 | 0,731 | 0,737 | 1 |
| Tmem267   | 0,498376 | -0,00378 | 0,102 | 0,091 | 1 |
| Trim27    | 0,498671 | 0,005054 | 0,173 | 0,159 | 1 |
| Dut       | 0,498715 | 0,027998 | 0,18  | 0,169 | 1 |
| Gtf2h2    | 0,498774 | 0,008816 | 0,189 | 0,176 | 1 |
| Plpp2     | 0,499069 | 0,01252  | 0,652 | 0,633 | 1 |
| Gm12166   | 0,499326 | 0,007091 | 0,069 | 0,06  | 1 |
| Cdk2      | 0,499554 | 0,004051 | 0,062 | 0,054 | 1 |
| Cep162    | 0,49958  | -0,00344 | 0,194 | 0,21  | 1 |
| Pex16     | 0,499682 | -0,01164 | 0,307 | 0,324 | 1 |
| Gm14325   | 0,499759 | -0,0053  | 0,043 | 0,05  | 1 |
| Gtpbp4    | 0,499914 | -0,03616 | 0,483 | 0,462 | 1 |
| Usp19     | 0,500215 | -0,01541 | 0,455 | 0,472 | 1 |
| Ndufa12   | 0,500323 | -0,00616 | 0,721 | 0,753 | 1 |
| Serpina3n | 0,500437 | -0,3018  | 0,659 | 0,593 | 1 |
| Spr       | 0,500704 | -0,01466 | 0,476 | 0,491 | 1 |
| Ube2w     | 0,500815 | 0,033288 | 0,361 | 0,354 | 1 |
| Fam60a    | 0,500907 | -0,02238 | 0,075 | 0,083 | 1 |
| Tmem38b   | 0,501132 | 0,005281 | 0,452 | 0,429 | 1 |
| 6030458C  | 0,501165 | -0,00325 | 0,178 | 0,192 | 1 |
| 4930453N  | 0,501195 | 0,000665 | 0,33  | 0,353 | 1 |
| Fgd6      | 0,501349 | 0,014269 | 0,085 | 0,076 | 1 |
| Tmed2     | 0,501471 | 0,017373 | 0,951 | 0,933 | 1 |
| Mapk1ip1l | 0,501518 | 0,006789 | 0,294 | 0,317 | 1 |
| Trpm7     | 0,50154  | 0,037026 | 0,655 | 0,654 | 1 |
| Kbtbd8    | 0,501647 | -0,00381 | 0,063 | 0,072 | 1 |
| Esco1     | 0,501823 | -0,01771 | 0,268 | 0,281 | 1 |
| Rpn2      | 0,502053 | -0,00155 | 0,764 | 0,776 | 1 |
| Hmbs      | 0,502138 | -0,00328 | 0,249 | 0,265 | 1 |
| Ift140    | 0,50219  | -0,00435 | 0,128 | 0,14  | 1 |
| Slc4a8    | 0,502242 | 0,025948 | 0,273 | 0,26  | 1 |
| Klhl26    | 0,502403 | -0,00199 | 0,101 | 0,112 | 1 |
| Nfe2l1    | 0,502526 | 0,021871 | 0,553 | 0,546 | 1 |
| Zfp53     | 0,502618 | -0,00638 | 0,103 | 0,114 | 1 |
| Rfx5      | 0,502693 | -0,0113  | 0,051 | 0,059 | 1 |
| Zc3hav1   | 0,502714 | -0,04112 | 0,172 | 0,182 | 1 |
| Gm4924    | 0,502877 | -0,01589 | 0,146 | 0,158 | 1 |
| Rc3h2     | 0,50291  | -0,00964 | 0,605 | 0,621 | 1 |
| Sos2      | 0,503046 | -0,0034  | 0,487 | 0,517 | 1 |
| Nudt21    | 0,50305  | 0,031058 | 0,499 | 0,485 | 1 |
| Ccar1     | 0,503323 | 0,025217 | 0,602 | 0,579 | 1 |
| B630019K  | 0,503421 | -0,00422 | 0,112 | 0,124 | 1 |
| Zzef1     | 0,503531 | -0,02449 | 0,357 | 0,367 | 1 |
| Ccdc93    | 0,503595 | -0,00647 | 0,114 | 0,125 | 1 |
| Fam117b   | 0,503648 | 0,049898 | 0,354 | 0,353 | 1 |
| Coq10b    | 0,503728 | 0,036551 | 0,242 | 0,231 | 1 |
| 3110062M  | 0,503737 | -0,01654 | 0,157 | 0,169 | 1 |

|           |          |          |       |       |   |
|-----------|----------|----------|-------|-------|---|
| Adprh     | 0,503816 | 0,01659  | 0,636 | 0,634 | 1 |
| Fam3c     | 0,503848 | -0,002   | 0,207 | 0,224 | 1 |
| Msantd2   | 0,503914 | -0,00251 | 0,159 | 0,172 | 1 |
| Zfp955b   | 0,503938 | -0,01111 | 0,102 | 0,112 | 1 |
| Tor1aip1  | 0,504028 | -0,02479 | 0,686 | 0,689 | 1 |
| Agps      | 0,504085 | -0,0121  | 0,537 | 0,556 | 1 |
| Cabin1    | 0,50421  | -0,02096 | 0,244 | 0,259 | 1 |
| Pkmyt1    | 0,504212 | -0,00339 | 0,104 | 0,115 | 1 |
| Naa16     | 0,504357 | 0,031516 | 0,236 | 0,226 | 1 |
| Ldha      | 0,504584 | -0,01618 | 0,089 | 0,099 | 1 |
| Mturn     | 0,504591 | 0,033578 | 0,142 | 0,132 | 1 |
| Al480526  | 0,50462  | -0,02604 | 0,268 | 0,283 | 1 |
| Srsf1     | 0,504916 | -0,01753 | 0,63  | 0,663 | 1 |
| Plekhm1   | 0,504961 | -0,00208 | 0,123 | 0,135 | 1 |
| Ubxn6     | 0,505105 | 0,02741  | 0,659 | 0,663 | 1 |
| Tom1l2    | 0,505372 | -0,00476 | 0,606 | 0,633 | 1 |
| Arhgef12  | 0,505408 | 0,029247 | 0,765 | 0,763 | 1 |
| Srek1ip1  | 0,505479 | -0,00197 | 0,183 | 0,197 | 1 |
| Tfe3      | 0,505608 | -0,0102  | 0,204 | 0,22  | 1 |
| A730017C  | 0,505693 | -0,0063  | 0,014 | 0,018 | 1 |
| Nudc      | 0,506015 | 0,009591 | 0,866 | 0,844 | 1 |
| Ubqln1    | 0,506042 | 0,02679  | 0,768 | 0,772 | 1 |
| Kank2     | 0,506065 | -0,02139 | 0,114 | 0,124 | 1 |
| Med27     | 0,506125 | -0,01306 | 0,203 | 0,218 | 1 |
| Klk8      | 0,506137 | -0,0457  | 0,057 | 0,049 | 1 |
| Synpo2    | 0,506178 | -0,00568 | 0,014 | 0,018 | 1 |
| Clmn      | 0,506228 | -0,03045 | 0,895 | 0,885 | 1 |
| Rps18     | 0,506515 | 0,006767 | 0,972 | 0,969 | 1 |
| 4930522L1 | 0,506553 | 0,006162 | 0,109 | 0,098 | 1 |
| Ndufa13   | 0,506688 | 0,018693 | 0,977 | 0,984 | 1 |
| Elovl7    | 0,506961 | -0,016   | 0,962 | 0,961 | 1 |
| Aldh1l2   | 0,506995 | -0,04355 | 0,408 | 0,415 | 1 |
| Babam1    | 0,507013 | 0,027425 | 0,442 | 0,429 | 1 |
| Tmem132c  | 0,507242 | 0,009035 | 0,025 | 0,02  | 1 |
| Gm15050   | 0,507295 | 0,00712  | 0,044 | 0,037 | 1 |
| Cdc123    | 0,507303 | 0,027404 | 0,561 | 0,554 | 1 |
| Eif6      | 0,507309 | 0,023027 | 0,762 | 0,759 | 1 |
| Cspp1     | 0,507361 | 0,020173 | 0,459 | 0,436 | 1 |
| Acvr2b    | 0,507464 | -0,03066 | 0,232 | 0,241 | 1 |
| Fam126a   | 0,507825 | -0,00397 | 0,495 | 0,515 | 1 |
| Bcas3     | 0,507938 | -0,00824 | 0,355 | 0,374 | 1 |
| Tmem259   | 0,507973 | 0,029157 | 0,597 | 0,595 | 1 |
| Lrpprc    | 0,508059 | 0,026166 | 0,402 | 0,393 | 1 |
| Tcea2     | 0,508838 | 0,00057  | 0,093 | 0,104 | 1 |
| Upf3b     | 0,509005 | -0,01425 | 0,607 | 0,624 | 1 |
| Laptm4a   | 0,509347 | 0,017077 | 0,873 | 0,85  | 1 |
| Taf15     | 0,509375 | -0,02287 | 0,61  | 0,626 | 1 |
| Znhit3    | 0,509581 | 0,015509 | 0,292 | 0,278 | 1 |
| Lzts1     | 0,509664 | 0,005237 | 0,025 | 0,02  | 1 |
| Tbc1d12   | 0,509989 | -0,006   | 0,433 | 0,459 | 1 |
| Rell1     | 0,51025  | -0,02012 | 0,443 | 0,457 | 1 |
| Gpatch3   | 0,510291 | 0,017157 | 0,065 | 0,057 | 1 |



|           |          |          |       |       |   |
|-----------|----------|----------|-------|-------|---|
| Klhl2     | 0,510364 | 0,022495 | 0,978 | 0,979 | 1 |
| Cdkn1a    | 0,51044  | 0,081312 | 0,142 | 0,132 | 1 |
| Frmd6     | 0,510551 | 0,002491 | 0,055 | 0,047 | 1 |
| Zmym2     | 0,510586 | 0,001301 | 0,376 | 0,4   | 1 |
| Lonp1     | 0,510651 | -0,00349 | 0,359 | 0,382 | 1 |
| Mcfd2     | 0,510694 | -0,02928 | 0,402 | 0,408 | 1 |
| Hspb8     | 0,510767 | -0,01196 | 0,028 | 0,034 | 1 |
| 17001230  | 0,510892 | -0,00601 | 0,279 | 0,296 | 1 |
| Rad54l2   | 0,511154 | 0,007134 | 0,236 | 0,221 | 1 |
| Zfp174    | 0,511265 | -0,0016  | 0,04  | 0,047 | 1 |
| Sntb2     | 0,511274 | 0,014673 | 0,065 | 0,057 | 1 |
| Rpl22l1   | 0,511293 | -0,00617 | 0,759 | 0,784 | 1 |
| Filip1    | 0,511407 | 0,001402 | 0,014 | 0,018 | 1 |
| Tsfm      | 0,511567 | -0,01875 | 0,205 | 0,218 | 1 |
| Ssb       | 0,511636 | -0,00454 | 0,816 | 0,846 | 1 |
| Phf11c    | 0,511737 | -0,00148 | 0,014 | 0,018 | 1 |
| Pebp1     | 0,511825 | -0,01281 | 0,98  | 0,98  | 1 |
| 201011110 | 0,512119 | -0,00168 | 0,551 | 0,574 | 1 |
| Timmdc1   | 0,512459 | -0,01678 | 0,18  | 0,192 | 1 |
| Zfand4    | 0,512609 | -0,0118  | 0,045 | 0,052 | 1 |
| Mfsd13b   | 0,512621 | -0,00541 | 0,034 | 0,041 | 1 |
| Invs      | 0,51264  | -0,01574 | 0,187 | 0,2   | 1 |
| Mapkapk5  | 0,512699 | -0,0087  | 0,127 | 0,138 | 1 |
| Cmc2      | 0,512865 | -0,00625 | 0,18  | 0,193 | 1 |
| Ift52     | 0,512965 | -0,01443 | 0,226 | 0,239 | 1 |
| Ptpn13    | 0,51297  | -0,01731 | 0,028 | 0,034 | 1 |
| Tnrc18    | 0,513019 | 0,01067  | 0,311 | 0,299 | 1 |
| 1600014C  | 0,513044 | 0,012803 | 0,121 | 0,111 | 1 |
| Bcap31    | 0,513047 | 0,021717 | 0,929 | 0,943 | 1 |
| Rbm42     | 0,513064 | 0,031085 | 0,75  | 0,753 | 1 |
| Tgs1      | 0,513231 | -0,0024  | 0,454 | 0,481 | 1 |
| Rwdd4a    | 0,513305 | 0,02422  | 0,277 | 0,263 | 1 |
| Pdcd6ip   | 0,513345 | -0,00255 | 0,746 | 0,769 | 1 |
| Gm11032   | 0,513374 | -0,00181 | 0,014 | 0,018 | 1 |
| Gm26802   | 0,51351  | 0,075386 | 0,049 | 0,042 | 1 |
| Mmgt2     | 0,513523 | 0,011211 | 0,033 | 0,028 | 1 |
| Tmc7      | 0,513609 | -0,00538 | 0,321 | 0,335 | 1 |
| Sidt2     | 0,513615 | -0,01482 | 0,418 | 0,429 | 1 |
| Cflar     | 0,513684 | -0,0065  | 0,22  | 0,237 | 1 |
| Ssbp4     | 0,513692 | 0,007387 | 0,069 | 0,06  | 1 |
| Tmem191c  | 0,5138   | -0,01149 | 0,07  | 0,078 | 1 |
| Slc25a38  | 0,51389  | 0,000376 | 0,245 | 0,263 | 1 |
| Ap1g2     | 0,514131 | 0,004622 | 0,044 | 0,037 | 1 |
| Wscd1     | 0,514195 | 0,023224 | 0,998 | 0,998 | 1 |
| Lin54     | 0,514277 | -0,01375 | 0,336 | 0,35  | 1 |
| Lemd2     | 0,514278 | -0,01038 | 0,412 | 0,433 | 1 |
| Psmb2     | 0,514325 | 0,005972 | 0,859 | 0,893 | 1 |
| Saraf     | 0,514374 | 0,026316 | 0,971 | 0,98  | 1 |
| Myo19     | 0,514524 | -0,00148 | 0,014 | 0,018 | 1 |
| Prdm15    | 0,51453  | -0,00114 | 0,095 | 0,106 | 1 |
| Shc1      | 0,514542 | -0,0029  | 0,093 | 0,104 | 1 |
| Rars      | 0,514777 | -0,01057 | 0,217 | 0,231 | 1 |

|           |          |          |       |       |   |
|-----------|----------|----------|-------|-------|---|
| Smad5     | 0,515134 | -0,01639 | 0,377 | 0,392 | 1 |
| AC130815. | 0,515182 | 0,057472 | 0,216 | 0,207 | 1 |
| Rnf145    | 0,515204 | -0,01814 | 0,252 | 0,267 | 1 |
| Zfp287    | 0,515324 | -0,00456 | 0,212 | 0,228 | 1 |
| Gm9958    | 0,515432 | -0,005   | 0,017 | 0,021 | 1 |
| Dcaf5     | 0,515471 | -0,00823 | 0,164 | 0,177 | 1 |
| Rfc1      | 0,51549  | -0,00517 | 0,671 | 0,706 | 1 |
| Ciart     | 0,51558  | 0,014121 | 0,097 | 0,088 | 1 |
| Fancl     | 0,515613 | -0,00638 | 0,103 | 0,114 | 1 |
| Zbtb5     | 0,515662 | -0,00924 | 0,134 | 0,146 | 1 |
| Rel       | 0,515678 | 0,023618 | 0,068 | 0,06  | 1 |
| Rab11b    | 0,515772 | -0,01192 | 0,819 | 0,847 | 1 |
| Mrpl9     | 0,515881 | 0,033598 | 0,417 | 0,41  | 1 |
| Zfp697    | 0,515971 | 0,010334 | 0,023 | 0,018 | 1 |
| Gm16794   | 0,515977 | 0,010644 | 0,023 | 0,018 | 1 |
| Rgs20     | 0,516006 | 0,00014  | 0,014 | 0,018 | 1 |
| Zfhx2     | 0,516016 | -0,004   | 0,246 | 0,263 | 1 |
| H2afz     | 0,516024 | 0,013083 | 0,852 | 0,839 | 1 |
| Atf1      | 0,51607  | 0,043827 | 0,29  | 0,286 | 1 |
| Tmem231   | 0,516229 | -0,00696 | 0,031 | 0,037 | 1 |
| Gtf2ird2  | 0,516304 | -0,00487 | 0,054 | 0,062 | 1 |
| Nampt     | 0,516594 | -0,00232 | 0,6   | 0,624 | 1 |
| MLx       | 0,516596 | -0,00625 | 0,301 | 0,322 | 1 |
| AC163720. | 0,516601 | -0,01511 | 0,045 | 0,052 | 1 |
| Gaa       | 0,51661  | -0,00777 | 0,411 | 0,437 | 1 |
| Cmip      | 0,516616 | 0,019276 | 0,609 | 0,613 | 1 |
| Smc2os    | 0,516783 | -0,00872 | 0,023 | 0,028 | 1 |
| Gm43848   | 0,517058 | -0,00922 | 0,159 | 0,172 | 1 |
| Rps17     | 0,51709  | -0,01053 | 0,985 | 0,974 | 1 |
| Ampd2     | 0,517126 | -0,00904 | 0,062 | 0,07  | 1 |
| Pelp1     | 0,517138 | -0,00582 | 0,186 | 0,202 | 1 |
| Lrrc42    | 0,517183 | -0,00375 | 0,206 | 0,223 | 1 |
| 1700030K( | 0,51728  | 0,015123 | 0,088 | 0,08  | 1 |
| Gm20721   | 0,517389 | -0,00403 | 0,017 | 0,021 | 1 |
| Recql4    | 0,517504 | -0,00049 | 0,025 | 0,02  | 1 |
| Man1c1    | 0,517505 | 0,00204  | 0,1   | 0,089 | 1 |
| Wdr59     | 0,517583 | -0,01561 | 0,211 | 0,224 | 1 |
| Pla2g12a  | 0,51765  | -0,02058 | 0,385 | 0,398 | 1 |
| Il17b     | 0,517665 | -0,00912 | 0,028 | 0,034 | 1 |
| Anapc5    | 0,517708 | 0,031054 | 0,861 | 0,837 | 1 |
| Tmem163   | 0,517829 | -0,00952 | 0,216 | 0,229 | 1 |
| Pramef8   | 0,517961 | -0,01175 | 0,088 | 0,098 | 1 |
| Lynx1     | 0,517962 | 0,009362 | 0,023 | 0,018 | 1 |
| Acap3     | 0,518158 | 0,021201 | 0,165 | 0,154 | 1 |
| Ipo7      | 0,518408 | -0,00497 | 0,431 | 0,459 | 1 |
| Mrpl55    | 0,518413 | -0,01976 | 0,421 | 0,437 | 1 |
| Eef1e1    | 0,518673 | -0,02559 | 0,336 | 0,346 | 1 |
| Bmp2      | 0,51877  | 0,013184 | 0,058 | 0,05  | 1 |
| Eml2      | 0,518789 | -0,01958 | 0,93  | 0,919 | 1 |
| 2410002F2 | 0,519232 | 0,018333 | 0,395 | 0,385 | 1 |
| Sugp1     | 0,519297 | 0,011126 | 0,292 | 0,278 | 1 |
| Zfand5    | 0,519338 | 0,030167 | 0,948 | 0,948 | 1 |

|          |          |          |       |       |   |
|----------|----------|----------|-------|-------|---|
| Chd7     | 0,519362 | -0,00162 | 0,698 | 0,724 | 1 |
| Fadd     | 0,519369 | -0,00227 | 0,133 | 0,146 | 1 |
| Nbr1     | 0,519397 | 0,029451 | 0,784 | 0,784 | 1 |
| Trim11   | 0,51964  | -0,00957 | 0,174 | 0,187 | 1 |
| Serpine2 | 0,519923 | -0,00557 | 0,023 | 0,028 | 1 |
| Ikzf4    | 0,519959 | -0,00591 | 0,017 | 0,021 | 1 |
| Xpr1     | 0,520023 | 0,016184 | 0,222 | 0,208 | 1 |
| Vps37d   | 0,520179 | 0,009219 | 0,072 | 0,063 | 1 |
| Enho     | 0,520272 | -0,01745 | 0,301 | 0,315 | 1 |
| Ulk4     | 0,520389 | 0,018465 | 0,056 | 0,049 | 1 |
| Fam208b  | 0,52045  | -0,02222 | 0,314 | 0,33  | 1 |
| Pus7l    | 0,520451 | 0,011386 | 0,058 | 0,05  | 1 |
| Bckdhb   | 0,520549 | 0,014715 | 0,251 | 0,237 | 1 |
| 5430403G | 0,520558 | -0,00164 | 0,071 | 0,08  | 1 |
| Maff     | 0,520654 | 0,007774 | 0,023 | 0,018 | 1 |
| Svip     | 0,520705 | -0,01826 | 0,689 | 0,717 | 1 |
| Mogat1   | 0,520706 | -0,00608 | 0,028 | 0,034 | 1 |
| Ptov1    | 0,520794 | -0,01346 | 0,85  | 0,834 | 1 |
| Ddx51    | 0,520807 | -0,00043 | 0,077 | 0,086 | 1 |
| Thnsl2   | 0,520808 | -0,00734 | 0,007 | 0,01  | 1 |
| Celf1    | 0,521022 | 0,032332 | 0,605 | 0,587 | 1 |
| Zfp442   | 0,521299 | -0,0066  | 0,086 | 0,096 | 1 |
| Pmm2     | 0,521523 | -0,0062  | 0,354 | 0,374 | 1 |
| Cbx2     | 0,521753 | -0,0037  | 0,02  | 0,024 | 1 |
| Gm47320  | 0,521916 | -0,00148 | 0,017 | 0,021 | 1 |
| Gba2     | 0,521983 | -0,00512 | 0,084 | 0,094 | 1 |
| AW554918 | 0,522009 | 0,006137 | 0,187 | 0,174 | 1 |
| Wfs1     | 0,522126 | 0,018886 | 0,122 | 0,112 | 1 |
| Zfp622   | 0,522419 | 0,009823 | 0,268 | 0,252 | 1 |
| Itga8    | 0,522421 | -0,00299 | 0,025 | 0,02  | 1 |
| Gm15601  | 0,522466 | -0,00399 | 0,02  | 0,024 | 1 |
| Cwc22    | 0,522716 | -0,01417 | 0,184 | 0,197 | 1 |
| Lamtor1  | 0,522876 | -0,01081 | 0,84  | 0,849 | 1 |
| Nkrf     | 0,522879 | 0,01762  | 0,075 | 0,067 | 1 |
| Maz      | 0,522963 | 0,009051 | 0,622 | 0,595 | 1 |
| Acbd5    | 0,523003 | -0,00273 | 0,737 | 0,782 | 1 |
| Mfn2     | 0,523064 | -0,02359 | 0,304 | 0,314 | 1 |
| Vps11    | 0,523106 | -0,01236 | 0,363 | 0,379 | 1 |
| Mrpl14   | 0,5232   | -0,00418 | 0,566 | 0,592 | 1 |
| Lrrc8d   | 0,52322  | 0,027222 | 0,562 | 0,559 | 1 |
| Gm13373  | 0,52332  | -0,00447 | 0,007 | 0,01  | 1 |
| 4930558K | 0,52332  | -0,00608 | 0,007 | 0,01  | 1 |
| Mfsd4a   | 0,523525 | -0,00286 | 0,134 | 0,146 | 1 |
| Rsph9    | 0,523526 | 0,001626 | 0,06  | 0,068 | 1 |
| Zan      | 0,523552 | -0,00476 | 0,007 | 0,01  | 1 |
| Figl2    | 0,523873 | -0,00394 | 0,026 | 0,031 | 1 |
| Zmat5    | 0,523883 | 0,035174 | 0,553 | 0,558 | 1 |
| Slc39a3  | 0,523969 | -0,00686 | 0,492 | 0,515 | 1 |
| Sephs2   | 0,524115 | 0,020905 | 0,242 | 0,231 | 1 |
| Gpalpp1  | 0,524237 | -0,01858 | 0,223 | 0,234 | 1 |
| Rpusd4   | 0,524311 | 0,001047 | 0,076 | 0,067 | 1 |
| Map3k3   | 0,524461 | 0,018345 | 0,158 | 0,146 | 1 |

|          |          |          |       |       |   |
|----------|----------|----------|-------|-------|---|
| Akr1b10  | 0,524466 | -0,0051  | 0,007 | 0,01  | 1 |
| Rtl6     | 0,524676 | -0,00883 | 0,118 | 0,128 | 1 |
| Lingo3   | 0,524695 | -0,0035  | 0,007 | 0,01  | 1 |
| Zpbp     | 0,524695 | -0,0035  | 0,007 | 0,01  | 1 |
| Cntnap2  | 0,524695 | -0,00413 | 0,007 | 0,01  | 1 |
| Clstn1   | 0,524702 | 0,040667 | 0,739 | 0,741 | 1 |
| Ly6g6d   | 0,524779 | 0,022743 | 0,224 | 0,211 | 1 |
| Tfpi2    | 0,524923 | -0,00286 | 0,007 | 0,01  | 1 |
| Gm26797  | 0,524923 | -0,00286 | 0,007 | 0,01  | 1 |
| Ccdc40   | 0,524923 | -0,00286 | 0,007 | 0,01  | 1 |
| Prkd1    | 0,524926 | -0,00219 | 0,007 | 0,01  | 1 |
| Irs1     | 0,52493  | 0,012733 | 0,081 | 0,073 | 1 |
| Cnot9    | 0,524935 | -0,00035 | 0,169 | 0,184 | 1 |
| Serinc1  | 0,52517  | -0,01705 | 0,997 | 1     | 1 |
| Rhno1    | 0,525323 | -0,00025 | 0,185 | 0,2   | 1 |
| Skiv2l2  | 0,525325 | -0,00327 | 0,479 | 0,507 | 1 |
| Chek2    | 0,525489 | 0,022619 | 0,101 | 0,093 | 1 |
| Ap4e1    | 0,525508 | -0,00864 | 0,157 | 0,169 | 1 |
| Nudt11   | 0,525583 | -0,00043 | 0,114 | 0,125 | 1 |
| Etnk2    | 0,525613 | -0,00413 | 0,007 | 0,01  | 1 |
| Senp7    | 0,525741 | -0,01535 | 0,476 | 0,489 | 1 |
| Prps1l3  | 0,525833 | 0,009944 | 0,04  | 0,034 | 1 |
| Tpp1     | 0,525844 | 0,011698 | 0,67  | 0,662 | 1 |
| Tmem198  | 0,526072 | -0,00252 | 0,007 | 0,01  | 1 |
| Hist1h4a | 0,526072 | -0,00252 | 0,007 | 0,01  | 1 |
| Slc16a7  | 0,526079 | 0,018412 | 0,359 | 0,343 | 1 |
| Dennd1a  | 0,526092 | 0,035108 | 0,382 | 0,369 | 1 |
| Atp5d    | 0,526167 | 0,021227 | 0,959 | 0,959 | 1 |
| Chmp1b   | 0,526226 | 0,011342 | 0,585 | 0,572 | 1 |
| Kif19a   | 0,5263   | -0,00092 | 0,007 | 0,01  | 1 |
| 1810062G | 0,5263   | -0,00189 | 0,007 | 0,01  | 1 |
| Pdzrn3   | 0,5263   | -0,00189 | 0,007 | 0,01  | 1 |
| Gm11149  | 0,5263   | -0,00189 | 0,007 | 0,01  | 1 |
| Mpp5     | 0,52631  | -0,00168 | 0,841 | 0,854 | 1 |
| Ears2    | 0,526332 | -0,01198 | 0,067 | 0,075 | 1 |
| Slc19a1  | 0,526354 | 0,010448 | 0,07  | 0,062 | 1 |
| Arfgef3  | 0,526586 | -0,03934 | 0,26  | 0,268 | 1 |
| Spidr    | 0,526707 | -0,00443 | 0,14  | 0,153 | 1 |
| Med14    | 0,526715 | 0,008327 | 0,158 | 0,174 | 1 |
| Pbx2     | 0,526755 | -0,00671 | 0,247 | 0,265 | 1 |
| Pdlim3   | 0,526785 | 0,008108 | 0,021 | 0,016 | 1 |
| Ap1s1    | 0,527197 | 0,002114 | 0,378 | 0,398 | 1 |
| Mcph1    | 0,527428 | -0,00207 | 0,023 | 0,028 | 1 |
| Tstd2    | 0,527598 | -0,01587 | 0,272 | 0,285 | 1 |
| Gm38944  | 0,527679 | -0,00092 | 0,007 | 0,01  | 1 |
| Nrgn     | 0,527679 | -0,00092 | 0,007 | 0,01  | 1 |
| Mlc1     | 0,527679 | -0,00092 | 0,007 | 0,01  | 1 |
| Zfp109   | 0,527679 | 5,69E-05 | 0,007 | 0,01  | 1 |
| Taf9     | 0,52768  | 0,00039  | 0,007 | 0,01  | 1 |
| Pcsk2    | 0,527778 | 0,029128 | 0,133 | 0,124 | 1 |
| Ccdc62   | 0,527835 | -0,01522 | 0,09  | 0,099 | 1 |
| Papolg   | 0,527883 | -0,00908 | 0,107 | 0,117 | 1 |

|          |          |          |       |       |   |
|----------|----------|----------|-------|-------|---|
| Fam204a  | 0,527897 | -0,01337 | 0,617 | 0,626 | 1 |
| Mrpl45   | 0,527898 | -0,01261 | 0,271 | 0,285 | 1 |
| Fbxo33   | 0,528063 | 0,007811 | 0,243 | 0,259 | 1 |
| Gm11423  | 0,528104 | -0,00246 | 0,051 | 0,059 | 1 |
| Bmpr2    | 0,528137 | -0,01107 | 0,58  | 0,593 | 1 |
| Xpo7     | 0,528249 | -0,01203 | 0,395 | 0,416 | 1 |
| Rabl3    | 0,528252 | -0,01255 | 0,163 | 0,174 | 1 |
| Tipin    | 0,528396 | -0,02242 | 0,23  | 0,239 | 1 |
| Grk2     | 0,528397 | -0,00471 | 0,298 | 0,315 | 1 |
| Lrrc59   | 0,528397 | -0,01046 | 0,288 | 0,301 | 1 |
| Gfpt2    | 0,528615 | -0,00677 | 0,003 | 0,005 | 1 |
| Pcm1     | 0,528775 | 0,024121 | 0,895 | 0,872 | 1 |
| Rttm     | 0,528803 | -0,0082  | 0,091 | 0,101 | 1 |
| Nup107   | 0,528848 | 0,009626 | 0,113 | 0,102 | 1 |
| Glg1     | 0,529034 | 0,002538 | 0,796 | 0,829 | 1 |
| Cyb5r2   | 0,529101 | -0,00993 | 0,078 | 0,086 | 1 |
| Tubgcp3  | 0,529174 | -0,01172 | 0,231 | 0,247 | 1 |
| Fkbp3    | 0,52935  | -0,01311 | 0,649 | 0,681 | 1 |
| Tnk2     | 0,529611 | 0,006879 | 0,245 | 0,229 | 1 |
| Decr1    | 0,529736 | -0,00504 | 0,252 | 0,27  | 1 |
| Zc3h10   | 0,529746 | -0,00667 | 0,124 | 0,135 | 1 |
| Nt5dc2   | 0,529967 | -0,0074  | 0,003 | 0,005 | 1 |
| Heatr1   | 0,53001  | -0,00915 | 0,086 | 0,096 | 1 |
| Trmt10b  | 0,530033 | 0,006625 | 0,244 | 0,229 | 1 |
| Use1     | 0,530182 | 0,019717 | 0,629 | 0,615 | 1 |
| Pofut1   | 0,530254 | -0,01262 | 0,202 | 0,215 | 1 |
| Tmem170b | 0,530295 | -0,01134 | 0,258 | 0,273 | 1 |
| Clk4     | 0,530432 | 0,020911 | 0,744 | 0,75  | 1 |
| Pex19    | 0,530479 | -0,01582 | 0,5   | 0,527 | 1 |
| Fcnaos   | 0,530644 | -0,00354 | 0,003 | 0,005 | 1 |
| Gm27206  | 0,530644 | -0,00354 | 0,003 | 0,005 | 1 |
| Ncapg    | 0,530644 | -0,00354 | 0,003 | 0,005 | 1 |
| Gm15396  | 0,530644 | -0,00354 | 0,003 | 0,005 | 1 |
| Gm26705  | 0,530644 | -0,00354 | 0,003 | 0,005 | 1 |
| Tacc2    | 0,530644 | -0,00354 | 0,003 | 0,005 | 1 |
| Nefm     | 0,530644 | -0,00354 | 0,003 | 0,005 | 1 |
| Gm4117   | 0,530644 | -0,00354 | 0,003 | 0,005 | 1 |
| Map3k8   | 0,530644 | -0,00354 | 0,003 | 0,005 | 1 |
| Ina      | 0,530644 | -0,00354 | 0,003 | 0,005 | 1 |
| Cfap43   | 0,530644 | -0,00354 | 0,003 | 0,005 | 1 |
| Ptptrt   | 0,530644 | -0,00516 | 0,003 | 0,005 | 1 |
| 4930444M | 0,530644 | -0,00516 | 0,003 | 0,005 | 1 |
| Arhgap18 | 0,530644 | -0,00418 | 0,003 | 0,005 | 1 |
| Abhd11   | 0,530812 | 0,021023 | 0,248 | 0,236 | 1 |
| Zfp472   | 0,530837 | 0,007958 | 0,09  | 0,081 | 1 |
| Sumo1    | 0,53106  | 0,029028 | 0,713 | 0,725 | 1 |
| Gli2     | 0,531321 | -0,00418 | 0,003 | 0,005 | 1 |
| Brpf1    | 0,53138  | 0,0093   | 0,201 | 0,189 | 1 |
| Miga1    | 0,531449 | 0,036477 | 0,393 | 0,384 | 1 |
| Znhit6   | 0,531532 | 0,005376 | 0,271 | 0,254 | 1 |
| Plekha6  | 0,53166  | -0,00193 | 0,003 | 0,005 | 1 |
| 49305510 | 0,53166  | -0,00193 | 0,003 | 0,005 | 1 |

|            |          |          |       |       |   |
|------------|----------|----------|-------|-------|---|
| Lamp5      | 0,53166  | -0,00193 | 0,003 | 0,005 | 1 |
| Trib3      | 0,53166  | -0,00193 | 0,003 | 0,005 | 1 |
| Gdpd2      | 0,53166  | -0,00193 | 0,003 | 0,005 | 1 |
| Arxes1     | 0,53166  | -0,00193 | 0,003 | 0,005 | 1 |
| Gm20754    | 0,53166  | -0,00193 | 0,003 | 0,005 | 1 |
| Gm43714    | 0,53166  | -0,00193 | 0,003 | 0,005 | 1 |
| She        | 0,53166  | -0,00193 | 0,003 | 0,005 | 1 |
| Vcam1      | 0,53166  | -0,00193 | 0,003 | 0,005 | 1 |
| Gm21962    | 0,53166  | -0,00193 | 0,003 | 0,005 | 1 |
| Mpl        | 0,53166  | -0,00193 | 0,003 | 0,005 | 1 |
| Gm10062    | 0,53166  | -0,00193 | 0,003 | 0,005 | 1 |
| Hoxa9      | 0,53166  | -0,00193 | 0,003 | 0,005 | 1 |
| Gm15704    | 0,53166  | -0,00193 | 0,003 | 0,005 | 1 |
| Gm44899    | 0,53166  | -0,00193 | 0,003 | 0,005 | 1 |
| Gm15635    | 0,53166  | -0,00193 | 0,003 | 0,005 | 1 |
| Gm44773    | 0,53166  | -0,00193 | 0,003 | 0,005 | 1 |
| Gm47578    | 0,53166  | -0,00193 | 0,003 | 0,005 | 1 |
| Gm32552    | 0,53166  | -0,00193 | 0,003 | 0,005 | 1 |
| Mcf2l      | 0,53166  | -0,00193 | 0,003 | 0,005 | 1 |
| Ank1       | 0,53166  | -0,00193 | 0,003 | 0,005 | 1 |
| Csgalnact1 | 0,53166  | -0,00193 | 0,003 | 0,005 | 1 |
| Elmo3      | 0,53166  | -0,00193 | 0,003 | 0,005 | 1 |
| Cacna1d    | 0,53166  | -0,00193 | 0,003 | 0,005 | 1 |
| AC114585.  | 0,53166  | -0,00193 | 0,003 | 0,005 | 1 |
| 4930505A:  | 0,53166  | -0,00193 | 0,003 | 0,005 | 1 |
| Tlx3       | 0,53166  | -0,00193 | 0,003 | 0,005 | 1 |
| 4930412M   | 0,53166  | -0,00193 | 0,003 | 0,005 | 1 |
| Abcc3      | 0,53166  | -0,00193 | 0,003 | 0,005 | 1 |
| 170009910  | 0,53166  | -0,00193 | 0,003 | 0,005 | 1 |
| AC164424.  | 0,53166  | -0,00193 | 0,003 | 0,005 | 1 |
| Mchr1      | 0,53166  | -0,00193 | 0,003 | 0,005 | 1 |
| Hoxc5      | 0,53166  | -0,00193 | 0,003 | 0,005 | 1 |
| 2810407A:  | 0,53166  | -0,00193 | 0,003 | 0,005 | 1 |
| Cbr3       | 0,53166  | -0,00193 | 0,003 | 0,005 | 1 |
| Gm20443    | 0,53166  | -0,00193 | 0,003 | 0,005 | 1 |
| Ddx11      | 0,53166  | -0,00193 | 0,003 | 0,005 | 1 |
| Stambpl1   | 0,53166  | -0,00193 | 0,003 | 0,005 | 1 |
| A330032B:  | 0,53166  | -0,00193 | 0,003 | 0,005 | 1 |
| Catip      | 0,53166  | -0,00257 | 0,003 | 0,005 | 1 |
| Dmrta1     | 0,53166  | -0,00257 | 0,003 | 0,005 | 1 |
| Mypopos    | 0,53166  | -0,00257 | 0,003 | 0,005 | 1 |
| Pou6f1     | 0,531716 | -0,01541 | 0,147 | 0,158 | 1 |
| Phtf1      | 0,531762 | 0,023839 | 0,141 | 0,132 | 1 |
| Slc23a1    | 0,531863 | 0,001445 | 0,026 | 0,031 | 1 |
| Tgfb3l     | 0,531999 | -0,00159 | 0,003 | 0,005 | 1 |
| Tubgcp6    | 0,532005 | -0,00032 | 0,087 | 0,098 | 1 |
| Nme6       | 0,532012 | 0,010573 | 0,109 | 0,099 | 1 |
| Rwdd2b     | 0,532037 | -0,0025  | 0,045 | 0,052 | 1 |
| Med6       | 0,532092 | 0,000228 | 0,213 | 0,231 | 1 |
| Stat3      | 0,532193 | 0,044868 | 0,728 | 0,714 | 1 |
| Hdhd3      | 0,532423 | 0,012392 | 0,047 | 0,041 | 1 |
| Dpf1       | 0,532435 | 0,0043   | 0,028 | 0,034 | 1 |

|           |          |          |       |       |   |
|-----------|----------|----------|-------|-------|---|
| Mrpl15    | 0,532585 | -0,01326 | 0,426 | 0,444 | 1 |
| Top1mt    | 0,532676 | -0,01487 | 0,14  | 0,151 | 1 |
| Lacc1     | 0,532677 | 0,001005 | 0,003 | 0,005 | 1 |
| CT025678. | 0,532677 | 2,86E-05 | 0,003 | 0,005 | 1 |
| A030005L1 | 0,532677 | -0,00095 | 0,003 | 0,005 | 1 |
| Gm26936   | 0,532677 | -0,00095 | 0,003 | 0,005 | 1 |
| F3        | 0,532677 | -0,00095 | 0,003 | 0,005 | 1 |
| Apoc4     | 0,532677 | -0,00095 | 0,003 | 0,005 | 1 |
| Rcvrn     | 0,532677 | -0,00095 | 0,003 | 0,005 | 1 |
| D630044L  | 0,532677 | -0,00095 | 0,003 | 0,005 | 1 |
| Rel2      | 0,532677 | -0,00095 | 0,003 | 0,005 | 1 |
| Grp       | 0,532677 | -0,00095 | 0,003 | 0,005 | 1 |
| Cfap53    | 0,532677 | -0,00095 | 0,003 | 0,005 | 1 |
| Rnf207    | 0,532677 | -0,00159 | 0,003 | 0,005 | 1 |
| Svil      | 0,532709 | -0,01628 | 0,098 | 0,107 | 1 |
| Wdr43     | 0,53275  | 0,033696 | 0,42  | 0,411 | 1 |
| 2810021J2 | 0,532791 | -0,00735 | 0,07  | 0,078 | 1 |
| Rngtt     | 0,533001 | 0,028185 | 0,308 | 0,299 | 1 |
| Zfp628    | 0,533013 | -0,00978 | 0,053 | 0,06  | 1 |
| Gm42047   | 0,533017 | 0,008765 | 0,003 | 0,005 | 1 |
| Zdhhc8    | 0,533023 | 0,01472  | 0,275 | 0,26  | 1 |
| Dus2      | 0,53305  | -0,01207 | 0,248 | 0,262 | 1 |
| Arap2     | 0,53307  | -0,04871 | 0,921 | 0,88  | 1 |
| Gale      | 0,533285 | -0,01    | 0,039 | 0,046 | 1 |
| Cog5      | 0,533385 | 0,022666 | 0,322 | 0,314 | 1 |
| Hagh      | 0,533481 | 0,030037 | 0,635 | 0,633 | 1 |
| Zfp597    | 0,533557 | -0,01332 | 0,132 | 0,143 | 1 |
| Fam76b    | 0,533739 | -0,00738 | 0,304 | 0,32  | 1 |
| Snrpd2    | 0,533756 | 0,020377 | 0,893 | 0,896 | 1 |
| Zfp94     | 0,533855 | 0,004145 | 0,115 | 0,127 | 1 |
| Wdr19     | 0,533897 | -0,00576 | 0,102 | 0,112 | 1 |
| C1ql3     | 0,5339   | -0,00372 | 0,137 | 0,15  | 1 |
| Lcmt2     | 0,533904 | -0,00903 | 0,078 | 0,086 | 1 |
| Trim68    | 0,533939 | -0,00839 | 0,067 | 0,075 | 1 |
| 1110004F1 | 0,534018 | 0,010613 | 0,83  | 0,831 | 1 |
| Lpcat1    | 0,534058 | -0,02028 | 0,134 | 0,145 | 1 |
| Snrnp27   | 0,534714 | -0,00762 | 0,739 | 0,751 | 1 |
| Fam184a   | 0,534719 | -0,0078  | 0,122 | 0,132 | 1 |
| Huwe1     | 0,534787 | 0,034959 | 0,818 | 0,815 | 1 |
| Pyroxd1   | 0,534826 | -0,00323 | 0,221 | 0,236 | 1 |
| C230037L1 | 0,535513 | -0,0092  | 0,266 | 0,283 | 1 |
| U2surp    | 0,535638 | 0,017048 | 0,809 | 0,805 | 1 |
| Neto2     | 0,535796 | 0,003955 | 0,021 | 0,016 | 1 |
| 5930430LC | 0,535863 | 0,006775 | 0,057 | 0,065 | 1 |
| Sema4b    | 0,536031 | 0,00712  | 0,04  | 0,034 | 1 |
| Xpc       | 0,536044 | 0,021645 | 0,153 | 0,143 | 1 |
| Trappc5   | 0,536559 | 0,005141 | 0,522 | 0,506 | 1 |
| Sall2     | 0,536624 | 0,00618  | 0,049 | 0,042 | 1 |
| Mical3    | 0,536703 | 0,011696 | 0,588 | 0,558 | 1 |
| AC165953. | 0,53677  | -0,00275 | 0,139 | 0,151 | 1 |
| Hars2     | 0,536971 | 0,007255 | 0,167 | 0,154 | 1 |
| Polr3a    | 0,536979 | -0,0083  | 0,22  | 0,233 | 1 |

|           |          |          |       |       |   |
|-----------|----------|----------|-------|-------|---|
| Bbs5      | 0,536987 | 0,009517 | 0,07  | 0,062 | 1 |
| Slc34a3   | 0,537307 | 0,027569 | 0,186 | 0,176 | 1 |
| Slc39a1   | 0,537338 | 0,040021 | 0,578 | 0,579 | 1 |
| Dennd4c   | 0,537516 | 0,019152 | 0,173 | 0,161 | 1 |
| Cdk13     | 0,537644 | 0,026244 | 0,437 | 0,475 | 1 |
| Cep120    | 0,537683 | -0,01541 | 0,415 | 0,431 | 1 |
| Prkx      | 0,537745 | 0,002824 | 0,218 | 0,234 | 1 |
| Zranb1    | 0,537849 | -0,01205 | 0,588 | 0,62  | 1 |
| Tmem160   | 0,53796  | -0,00736 | 0,393 | 0,41  | 1 |
| Trappc2l  | 0,537969 | 0,019491 | 0,646 | 0,649 | 1 |
| Zfp462    | 0,537999 | -0,00392 | 0,43  | 0,455 | 1 |
| Wdr45     | 0,538287 | -0,01297 | 0,354 | 0,371 | 1 |
| Ptpn9     | 0,538454 | -0,00772 | 0,128 | 0,138 | 1 |
| Mcm3ap    | 0,538462 | -0,00841 | 0,208 | 0,223 | 1 |
| Pcna      | 0,538491 | 0,019797 | 0,632 | 0,621 | 1 |
| Gm12092   | 0,538823 | 0,008594 | 0,068 | 0,06  | 1 |
| Zcchc10   | 0,53924  | -0,00015 | 0,189 | 0,205 | 1 |
| Poldip3   | 0,539311 | -0,01599 | 0,52  | 0,53  | 1 |
| Vps37c    | 0,539342 | 0,018111 | 0,285 | 0,272 | 1 |
| Coq7      | 0,53945  | -0,00243 | 0,444 | 0,468 | 1 |
| Msl3l2    | 0,539689 | -0,01813 | 0,255 | 0,267 | 1 |
| Kif5c     | 0,539704 | 0,031285 | 0,314 | 0,307 | 1 |
| Gm29394   | 0,540007 | 0,001567 | 0,048 | 0,055 | 1 |
| Zfp24     | 0,540038 | -0,001   | 0,636 | 0,681 | 1 |
| Znrf3     | 0,540094 | -0,00984 | 0,184 | 0,197 | 1 |
| Tle6      | 0,540132 | -0,01297 | 0,075 | 0,083 | 1 |
| Vma21     | 0,540201 | 0,021521 | 0,655 | 0,657 | 1 |
| Gdap1     | 0,540293 | 0,00503  | 0,109 | 0,12  | 1 |
| Xkr4      | 0,54035  | 0,019079 | 0,135 | 0,125 | 1 |
| Polg2     | 0,540504 | 0,017816 | 0,129 | 0,119 | 1 |
| Mis18a    | 0,540577 | -0,00409 | 0,042 | 0,049 | 1 |
| Mrm1      | 0,540698 | 0,013273 | 0,093 | 0,085 | 1 |
| Socs2     | 0,540818 | 0,01339  | 0,029 | 0,024 | 1 |
| Hist1h2be | 0,54086  | -0,01082 | 0,148 | 0,159 | 1 |
| Ddx52     | 0,540869 | -0,00792 | 0,303 | 0,319 | 1 |
| Dap       | 0,540928 | -0,00929 | 0,082 | 0,091 | 1 |
| Rbbp9     | 0,541058 | 0,021871 | 0,393 | 0,38  | 1 |
| Slc30a2   | 0,541081 | 0,00715  | 0,019 | 0,015 | 1 |
| Shkbp1    | 0,541174 | -0,00483 | 0,237 | 0,254 | 1 |
| Gpsm2     | 0,541221 | -0,01748 | 0,283 | 0,296 | 1 |
| Urgcp     | 0,54125  | 0,012845 | 0,191 | 0,179 | 1 |
| Fuca1     | 0,541283 | 0,004702 | 0,782 | 0,834 | 1 |
| N4bp2l2   | 0,541389 | 0,031777 | 0,631 | 0,639 | 1 |
| B3gat3    | 0,541486 | 0,021513 | 0,538 | 0,525 | 1 |
| Cdh2      | 0,541551 | 0,028823 | 0,767 | 0,78  | 1 |
| Apba3     | 0,541564 | 0,002047 | 0,221 | 0,237 | 1 |
| Nav2      | 0,541771 | 0,015892 | 0,245 | 0,233 | 1 |
| 0610040B: | 0,541783 | 0,014363 | 0,169 | 0,158 | 1 |
| Dnajc25   | 0,542268 | 0,016477 | 0,117 | 0,107 | 1 |
| Pradc1    | 0,542809 | -0,00346 | 0,242 | 0,259 | 1 |
| Tm9sf1    | 0,542872 | -0,00471 | 0,091 | 0,101 | 1 |
| Ankrd52   | 0,542991 | 0,025425 | 0,154 | 0,145 | 1 |



|          |          |          |       |       |   |
|----------|----------|----------|-------|-------|---|
| Ing5     | 0,543048 | -0,00679 | 0,198 | 0,211 | 1 |
| Arc      | 0,543118 | 0,026821 | 0,36  | 0,385 | 1 |
| Eif2b4   | 0,543232 | -0,00623 | 0,369 | 0,387 | 1 |
| Thrsp    | 0,543422 | 0,052515 | 0,154 | 0,146 | 1 |
| Ap3b1    | 0,543443 | 0,0308   | 0,375 | 0,366 | 1 |
| Msh3     | 0,543627 | 0,010558 | 0,324 | 0,341 | 1 |
| Hnrnp11  | 0,54372  | 0,025869 | 0,348 | 0,34  | 1 |
| Aar2     | 0,543884 | -0,01533 | 0,299 | 0,314 | 1 |
| Gm10501  | 0,54395  | 0,005231 | 0,019 | 0,015 | 1 |
| Gm27029  | 0,543954 | 0,006188 | 0,029 | 0,024 | 1 |
| TxIng    | 0,544042 | -0,0129  | 0,209 | 0,221 | 1 |
| Pnpla7   | 0,544043 | -0,01046 | 0,125 | 0,135 | 1 |
| Sort1    | 0,544109 | -0,01435 | 0,987 | 0,992 | 1 |
| Slc38a10 | 0,544121 | 0,022386 | 0,568 | 0,559 | 1 |
| Thg1l    | 0,544186 | -0,00422 | 0,083 | 0,093 | 1 |
| Kyat1    | 0,544219 | -0,00255 | 0,073 | 0,081 | 1 |
| Kxd1     | 0,544347 | -0,00133 | 0,453 | 0,481 | 1 |
| Bnip3l   | 0,544386 | -0,00101 | 1     | 1     | 1 |
| Nkain1   | 0,544408 | 0,013179 | 0,644 | 0,637 | 1 |
| Cul4b    | 0,544739 | 0,011811 | 0,135 | 0,125 | 1 |
| Snx8     | 0,544843 | -0,01404 | 0,298 | 0,312 | 1 |
| Tsr2     | 0,544955 | 0,022817 | 0,339 | 0,33  | 1 |
| Lgals9   | 0,545253 | -0,00636 | 0,01  | 0,013 | 1 |
| Rbm15    | 0,545257 | 0,006088 | 0,355 | 0,374 | 1 |
| Lmf1     | 0,5453   | 0,005467 | 0,422 | 0,454 | 1 |
| Casp2    | 0,545317 | -0,02083 | 0,128 | 0,137 | 1 |
| Dgkq     | 0,545589 | -0,00698 | 0,154 | 0,166 | 1 |
| Eif1b    | 0,545605 | -0,00443 | 0,847 | 0,875 | 1 |
| Fbxw11   | 0,545992 | 0,002417 | 0,436 | 0,468 | 1 |
| Rce1     | 0,546413 | -0,00443 | 0,287 | 0,304 | 1 |
| Stx12    | 0,546508 | 0,015011 | 0,77  | 0,743 | 1 |
| RbmX2    | 0,546643 | -0,01212 | 0,228 | 0,241 | 1 |
| Gm9972   | 0,546666 | 0,005231 | 0,019 | 0,015 | 1 |
| Ogfod3   | 0,546846 | 0,006649 | 0,203 | 0,221 | 1 |
| Fhl1     | 0,546846 | -0,03531 | 0,443 | 0,449 | 1 |
| Psmc3ip  | 0,546945 | 0,011211 | 0,036 | 0,031 | 1 |
| Zfp560   | 0,547006 | -0,00622 | 0,274 | 0,291 | 1 |
| Cdh20    | 0,547034 | -0,00265 | 0,403 | 0,429 | 1 |
| Hspb11   | 0,547136 | 0,029128 | 0,349 | 0,341 | 1 |
| Rnf111   | 0,547164 | -0,03793 | 0,341 | 0,346 | 1 |
| Zfp383   | 0,547241 | 0,01604  | 0,165 | 0,154 | 1 |
| Pate2    | 0,547243 | -0,00476 | 0,01  | 0,013 | 1 |
| Gm26964  | 0,547243 | -0,00636 | 0,01  | 0,013 | 1 |
| 1700069B | 0,547243 | -0,00796 | 0,01  | 0,013 | 1 |
| 5730455P | 0,547446 | -0,01677 | 0,458 | 0,478 | 1 |
| Aff3     | 0,54784  | 0,019372 | 0,143 | 0,133 | 1 |
| Zfp740   | 0,547908 | -0,01769 | 0,595 | 0,597 | 1 |
| Rfxank   | 0,548263 | -0,00835 | 0,193 | 0,207 | 1 |
| Lima1    | 0,548286 | 0,028413 | 0,2   | 0,19  | 1 |
| Akr1c13  | 0,548294 | 0,004927 | 0,038 | 0,033 | 1 |
| Manf     | 0,548353 | -0,02104 | 0,623 | 0,636 | 1 |
| Dph2     | 0,548364 | 0,01088  | 0,1   | 0,091 | 1 |

|           |          |          |       |       |   |
|-----------|----------|----------|-------|-------|---|
| Lin7b     | 0,548442 | -0,00442 | 0,01  | 0,013 | 1 |
| Lrrc14b   | 0,548639 | -0,00539 | 0,01  | 0,013 | 1 |
| Rgma      | 0,548808 | -0,0098  | 0,628 | 0,644 | 1 |
| Morn2     | 0,548838 | -0,0263  | 0,188 | 0,197 | 1 |
| Tkt       | 0,549034 | -0,00765 | 0,994 | 0,993 | 1 |
| Prmt1     | 0,549235 | 0,021441 | 0,7   | 0,686 | 1 |
| Txn14a    | 0,549238 | -0,00624 | 0,52  | 0,535 | 1 |
| Son       | 0,549416 | 0,014516 | 0,996 | 1     | 1 |
| Neb       | 0,549559 | 0,003955 | 0,019 | 0,015 | 1 |
| Madd      | 0,549639 | -0,00646 | 0,05  | 0,057 | 1 |
| Mtfr1l    | 0,549788 | -0,02768 | 0,557 | 0,556 | 1 |
| Abcf3     | 0,549821 | -0,00286 | 0,371 | 0,387 | 1 |
| Pdcl3     | 0,549851 | 0,019266 | 0,352 | 0,341 | 1 |
| Med4      | 0,550083 | -0,00522 | 0,408 | 0,428 | 1 |
| Cbwd1     | 0,550092 | 0,012571 | 0,152 | 0,141 | 1 |
| 2610037Dl | 0,550423 | -0,01082 | 0,158 | 0,169 | 1 |
| Dolpp1    | 0,550643 | -0,01187 | 0,149 | 0,159 | 1 |
| Cdon      | 0,5507   | 0,002371 | 0,103 | 0,114 | 1 |
| C8g       | 0,550835 | 0,001689 | 0,01  | 0,013 | 1 |
| Fcer1g    | 0,550835 | 0,000721 | 0,01  | 0,013 | 1 |
| Nop16     | 0,550952 | -0,00619 | 0,225 | 0,239 | 1 |
| Pwp1      | 0,551122 | 0,014246 | 0,217 | 0,205 | 1 |
| Csrnp3    | 0,551269 | -0,00748 | 0,224 | 0,237 | 1 |
| Nphp3     | 0,551568 | 0,011526 | 0,086 | 0,078 | 1 |
| Snx29     | 0,551574 | -0,00685 | 0,236 | 0,249 | 1 |
| Naa15     | 0,551781 | 0,02871  | 0,598 | 0,595 | 1 |
| Taco1     | 0,551812 | 0,009568 | 0,059 | 0,052 | 1 |
| Ift57     | 0,551868 | 0,001739 | 0,219 | 0,236 | 1 |
| Zc3h11a   | 0,551901 | -0,00065 | 0,083 | 0,093 | 1 |
| Ankrd13d  | 0,55195  | 0,005871 | 0,045 | 0,039 | 1 |
| Fn1       | 0,55206  | -2E-05   | 0,042 | 0,049 | 1 |
| Gm26981   | 0,552486 | 0,010905 | 0,029 | 0,024 | 1 |
| Gm49164   | 0,552487 | 0,008436 | 0,017 | 0,013 | 1 |
| Dnase1l2  | 0,552487 | 0,008436 | 0,017 | 0,013 | 1 |
| Kif1bp    | 0,552835 | 0,002606 | 0,892 | 0,902 | 1 |
| Abl1      | 0,553082 | -0,00442 | 0,628 | 0,646 | 1 |
| March7    | 0,553088 | -0,01582 | 0,538 | 0,533 | 1 |
| Snrnp200  | 0,553228 | -0,00775 | 0,438 | 0,454 | 1 |
| Csf2ra    | 0,553291 | 0,01677  | 0,172 | 0,161 | 1 |
| Rsrc1     | 0,55344  | -0,00074 | 0,729 | 0,751 | 1 |
| 5330434Gd | 0,553485 | -0,00454 | 0,368 | 0,387 | 1 |
| Plrg1     | 0,553671 | 0,012592 | 0,327 | 0,312 | 1 |
| Inf2      | 0,553792 | 0,041737 | 0,968 | 0,969 | 1 |
| Vkorc1    | 0,553851 | 0,003043 | 0,627 | 0,592 | 1 |
| Acox3     | 0,554156 | 0,03135  | 0,215 | 0,205 | 1 |
| Arl2bp    | 0,554159 | -0,01681 | 0,85  | 0,859 | 1 |
| Pafah1b1  | 0,554303 | -0,00542 | 0,998 | 1     | 1 |
| Nus1      | 0,554411 | 0,029954 | 0,435 | 0,433 | 1 |
| Sept1     | 0,554412 | -0,00077 | 0,378 | 0,397 | 1 |
| Rap1gap   | 0,554413 | 0,00556  | 0,036 | 0,031 | 1 |
| Acbd4     | 0,554573 | 0,008934 | 0,061 | 0,054 | 1 |
| Ube2m     | 0,554699 | 0,022454 | 0,754 | 0,777 | 1 |

|          |          |          |       |       |   |
|----------|----------|----------|-------|-------|---|
| Mrpl42   | 0,5547   | -0,02134 | 0,575 | 0,58  | 1 |
| Dtna     | 0,554743 | 0,038252 | 0,712 | 0,722 | 1 |
| Ppm1h    | 0,554749 | -0,00315 | 0,157 | 0,169 | 1 |
| Tcof1    | 0,554922 | 0,019969 | 0,272 | 0,26  | 1 |
| Sssca1   | 0,555005 | -0,0023  | 0,453 | 0,475 | 1 |
| Rplp1    | 0,555156 | 0,005324 | 0,999 | 0,998 | 1 |
| Hey1     | 0,555211 | 0,00555  | 0,017 | 0,013 | 1 |
| Prc1     | 0,555218 | 0,011932 | 0,017 | 0,013 | 1 |
| Bsg      | 0,55533  | 0,000233 | 0,954 | 0,948 | 1 |
| Zfp940   | 0,5556   | 0,003102 | 0,054 | 0,047 | 1 |
| Ak6      | 0,555946 | 0,026783 | 0,249 | 0,239 | 1 |
| Fgfr3    | 0,556054 | -0,0063  | 0,013 | 0,016 | 1 |
| Gfra1    | 0,556058 | 0,025673 | 0,15  | 0,141 | 1 |
| Zkscan14 | 0,55618  | 0,014803 | 0,12  | 0,111 | 1 |
| Tmem115  | 0,556192 | -0,01812 | 0,385 | 0,397 | 1 |
| Naa30    | 0,55639  | -0,00718 | 0,303 | 0,322 | 1 |
| Ccdc163  | 0,556605 | -0,02082 | 0,256 | 0,273 | 1 |
| Pnn      | 0,556678 | 0,023908 | 0,84  | 0,831 | 1 |
| B4galt3  | 0,556731 | 0,035465 | 0,293 | 0,286 | 1 |
| Gm16099  | 0,556752 | 0,003653 | 0,027 | 0,023 | 1 |
| Retreg3  | 0,557323 | 0,011647 | 0,672 | 0,646 | 1 |
| Pole2    | 0,557329 | -0,00702 | 0,027 | 0,033 | 1 |
| Mrfap1   | 0,557745 | 0,011421 | 0,995 | 0,997 | 1 |
| D130020L | 0,557935 | -0,00527 | 0,072 | 0,08  | 1 |
| Spock2   | 0,557941 | 0,003621 | 0,017 | 0,013 | 1 |
| Rsph3b   | 0,557941 | 0,003621 | 0,017 | 0,013 | 1 |
| Aldh3b2  | 0,557941 | 0,003621 | 0,017 | 0,013 | 1 |
| E330034G | 0,557946 | 0,004909 | 0,017 | 0,013 | 1 |
| Rap1gds1 | 0,558034 | -0,01422 | 0,815 | 0,81  | 1 |
| Ddx31    | 0,558058 | -0,00558 | 0,047 | 0,054 | 1 |
| Sh3gl3   | 0,55808  | -0,01133 | 0,456 | 0,481 | 1 |
| Gm15445  | 0,558082 | 0,011489 | 0,043 | 0,037 | 1 |
| Rsb1     | 0,558102 | 0,031658 | 0,419 | 0,411 | 1 |
| Cep70    | 0,558111 | 0,01477  | 0,153 | 0,143 | 1 |
| Vps53    | 0,558186 | -0,00865 | 0,435 | 0,454 | 1 |
| Gca      | 0,558344 | -0,01377 | 0,342 | 0,356 | 1 |
| Rbbp7    | 0,558387 | 0,037719 | 0,547 | 0,545 | 1 |
| Tmem70   | 0,558447 | 0,011479 | 0,283 | 0,27  | 1 |
| Bcl2     | 0,558459 | 0,000746 | 0,017 | 0,013 | 1 |
| Gm26541  | 0,558474 | 0,002701 | 0,027 | 0,023 | 1 |
| Dhx57    | 0,558539 | 0,021898 | 0,146 | 0,137 | 1 |
| Rala     | 0,558695 | 0,024701 | 0,815 | 0,844 | 1 |
| Flot2    | 0,558697 | 0,017334 | 0,298 | 0,285 | 1 |
| Mafb     | 0,558714 | -0,00221 | 0,027 | 0,033 | 1 |
| Slc12a8  | 0,558751 | -0,0049  | 0,025 | 0,029 | 1 |
| Impad1   | 0,558868 | -0,00572 | 0,733 | 0,754 | 1 |
| Nol10    | 0,559014 | -0,00783 | 0,101 | 0,111 | 1 |
| Commd4   | 0,559086 | 0,021545 | 0,609 | 0,598 | 1 |
| B4galt7  | 0,55917  | -0,00877 | 0,117 | 0,127 | 1 |
| Gm28557  | 0,559313 | 0,003308 | 0,017 | 0,013 | 1 |
| Zfp575   | 0,559492 | 0,004913 | 0,017 | 0,013 | 1 |
| Hcfc2    | 0,559505 | -0,01593 | 0,234 | 0,247 | 1 |

|           |          |          |       |       |   |
|-----------|----------|----------|-------|-------|---|
| Rbms1     | 0,55961  | -0,00955 | 0,289 | 0,306 | 1 |
| Zwint     | 0,559799 | 0,036145 | 0,413 | 0,421 | 1 |
| Cox4i1    | 0,560003 | -0,00746 | 0,999 | 1     | 1 |
| Prr14     | 0,560363 | 0,028094 | 0,252 | 0,241 | 1 |
| Zfp950    | 0,560432 | -0,01074 | 0,422 | 0,442 | 1 |
| Zbtb2     | 0,560452 | -0,01164 | 0,134 | 0,145 | 1 |
| 1110059E2 | 0,56055  | 0,024106 | 0,293 | 0,285 | 1 |
| Tsen54    | 0,560554 | -0,00852 | 0,077 | 0,085 | 1 |
| Catspere2 | 0,560684 | -0,00345 | 0,013 | 0,016 | 1 |
| Thumpd3   | 0,560771 | -0,02057 | 0,251 | 0,262 | 1 |
| Pot1a     | 0,560878 | -0,01908 | 0,255 | 0,268 | 1 |
| Pcdhga12  | 0,560908 | -0,00587 | 0,182 | 0,195 | 1 |
| Dnal4     | 0,561136 | 0,013839 | 0,276 | 0,263 | 1 |
| Mib2      | 0,5612   | 0,025747 | 0,263 | 0,255 | 1 |
| 4831440D  | 0,561227 | -0,00437 | 0,013 | 0,016 | 1 |
| Ubald1    | 0,561314 | -0,01505 | 0,492 | 0,512 | 1 |
| Socs6     | 0,561642 | 0,044865 | 0,288 | 0,283 | 1 |
| Sf3a2     | 0,561693 | 0,030537 | 0,379 | 0,371 | 1 |
| Glb1l     | 0,561784 | -0,00709 | 0,025 | 0,029 | 1 |
| Gm42067   | 0,562118 | -0,00215 | 0,013 | 0,016 | 1 |
| Fam193b   | 0,562277 | 0,004215 | 0,366 | 0,384 | 1 |
| Ube2d1    | 0,56244  | 0,022647 | 0,931 | 0,927 | 1 |
| Lyst      | 0,562489 | 0,029343 | 0,249 | 0,239 | 1 |
| Zbtb11os1 | 0,562563 | 0,024983 | 0,196 | 0,215 | 1 |
| Abca1     | 0,562655 | -0,01321 | 0,31  | 0,328 | 1 |
| Tmx3      | 0,562696 | 0,007287 | 0,653 | 0,685 | 1 |
| Plcg2     | 0,562958 | -0,00534 | 0,016 | 0,02  | 1 |
| Zfp458    | 0,562985 | 0,019959 | 0,168 | 0,158 | 1 |
| Srpk1     | 0,562996 | 0,002916 | 0,368 | 0,39  | 1 |
| Ranbp17   | 0,563065 | -0,00625 | 0,019 | 0,023 | 1 |
| S100pbp   | 0,563245 | 0,011072 | 0,213 | 0,202 | 1 |
| Tmem55b   | 0,563291 | -0,00809 | 0,737 | 0,732 | 1 |
| Znhit2    | 0,56339  | 0,013077 | 0,162 | 0,151 | 1 |
| Mxd1      | 0,563419 | -0,02322 | 0,268 | 0,28  | 1 |
| Ubap2l    | 0,563437 | 0,038932 | 0,691 | 0,688 | 1 |
| Sptbn1    | 0,563535 | -0,00025 | 0,959 | 0,964 | 1 |
| Smad3     | 0,563718 | 0,011355 | 0,111 | 0,102 | 1 |
| Tmem240   | 0,563956 | 0,017181 | 0,034 | 0,029 | 1 |
| Myd88     | 0,564014 | 0,020034 | 0,074 | 0,067 | 1 |
| Npr1      | 0,564025 | 0,000866 | 0,033 | 0,039 | 1 |
| Sobp      | 0,564294 | 0,006441 | 0,116 | 0,106 | 1 |
| Rcc1l     | 0,564301 | -0,00852 | 0,153 | 0,164 | 1 |
| Tgfbr3    | 0,564333 | 0,022265 | 0,167 | 0,158 | 1 |
| Mrpl54    | 0,564404 | -0,01879 | 0,454 | 0,467 | 1 |
| Asphd2    | 0,564523 | 0,017919 | 0,121 | 0,112 | 1 |
| Gm9803    | 0,564536 | 0,008671 | 0,05  | 0,044 | 1 |
| Actr10    | 0,564718 | 0,011884 | 0,729 | 0,722 | 1 |
| Amt       | 0,564794 | 0,003189 | 0,078 | 0,086 | 1 |
| Bcl10     | 0,564821 | -0,01772 | 0,406 | 0,423 | 1 |
| Gm5464    | 0,564915 | -0,00115 | 0,016 | 0,02  | 1 |
| Hat1      | 0,565026 | 0,005379 | 0,276 | 0,26  | 1 |
| Abcb7     | 0,565124 | -0,00515 | 0,174 | 0,185 | 1 |

|          |          |          |       |       |   |
|----------|----------|----------|-------|-------|---|
| Fam208a  | 0,565242 | -0,02229 | 0,71  | 0,712 | 1 |
| Tmsb15b2 | 0,565559 | -0,00374 | 0,016 | 0,02  | 1 |
| Fbxw15   | 0,565559 | -0,00374 | 0,016 | 0,02  | 1 |
| Stxbp5   | 0,565559 | -0,00714 | 0,181 | 0,193 | 1 |
| Gstm4    | 0,565574 | 0,015406 | 0,092 | 0,085 | 1 |
| Abcb1b   | 0,565635 | 0,010953 | 0,026 | 0,021 | 1 |
| Usp2     | 0,565667 | -0,03077 | 0,288 | 0,294 | 1 |
| Tmem51   | 0,565754 | 0,004329 | 0,052 | 0,046 | 1 |
| Zfp454   | 0,566099 | 0,011542 | 0,034 | 0,029 | 1 |
| Ctxn3    | 0,566132 | -0,00203 | 0,025 | 0,029 | 1 |
| Zfp982   | 0,566219 | -0,00403 | 0,016 | 0,02  | 1 |
| Polr2b   | 0,566277 | 0,040771 | 0,366 | 0,361 | 1 |
| Prdm2    | 0,566673 | 0,007354 | 0,358 | 0,39  | 1 |
| Trir     | 0,566681 | -0,01516 | 0,758 | 0,782 | 1 |
| Pgs1     | 0,566699 | 0,0113   | 0,306 | 0,291 | 1 |
| Rbbp4    | 0,566766 | -0,01461 | 0,863 | 0,88  | 1 |
| Rheb     | 0,566827 | -0,00149 | 0,605 | 0,634 | 1 |
| Ptpn18   | 0,566994 | 0,006192 | 0,015 | 0,011 | 1 |
| Gm16907  | 0,567123 | -0,00495 | 0,019 | 0,023 | 1 |
| Tcp1112  | 0,567348 | -0,00071 | 0,295 | 0,312 | 1 |
| Gm10010  | 0,567516 | -0,00278 | 0,016 | 0,02  | 1 |
| Ccdc122  | 0,567524 | -0,00466 | 0,016 | 0,02  | 1 |
| Pin1     | 0,568004 | -0,00602 | 0,613 | 0,633 | 1 |
| Prpf6    | 0,568127 | 0,007903 | 0,329 | 0,353 | 1 |
| Pak3     | 0,568211 | -0,00813 | 0,281 | 0,294 | 1 |
| Lbhd1    | 0,568278 | 0,005228 | 0,015 | 0,011 | 1 |
| Mrps23   | 0,568355 | 0,018086 | 0,371 | 0,359 | 1 |
| Dcxr     | 0,56844  | -0,01657 | 0,201 | 0,211 | 1 |
| Ctnna1   | 0,568652 | -0,00292 | 0,824 | 0,831 | 1 |
| 2310074N | 0,568771 | -0,00211 | 0,019 | 0,023 | 1 |
| Polr1e   | 0,568779 | -0,00013 | 0,025 | 0,029 | 1 |
| Olig2    | 0,568854 | 0,007473 | 0,763 | 0,779 | 1 |
| 1810010H | 0,56893  | -0,00108 | 0,027 | 0,033 | 1 |
| Kat5     | 0,569107 | 0,008776 | 0,28  | 0,301 | 1 |
| Lrp6     | 0,569207 | -0,00564 | 0,56  | 0,576 | 1 |
| Gm1976   | 0,569477 | 0,000113 | 0,016 | 0,02  | 1 |
| Gm49086  | 0,569564 | 0,006192 | 0,015 | 0,011 | 1 |
| Cdc5l    | 0,569678 | 0,014026 | 0,625 | 0,597 | 1 |
| Pcnp     | 0,569697 | 0,024182 | 0,961 | 0,951 | 1 |
| Ccdc159  | 0,56977  | -0,00371 | 0,044 | 0,05  | 1 |
| Tbl1xr1  | 0,569903 | 0,009849 | 0,511 | 0,543 | 1 |
| Insm1    | 0,569973 | -0,00075 | 0,025 | 0,029 | 1 |
| Mrps16   | 0,569984 | 0,03516  | 0,493 | 0,491 | 1 |
| Nfkb2    | 0,570104 | 0,008948 | 0,057 | 0,05  | 1 |
| Vps29    | 0,570208 | 0,000202 | 0,798 | 0,823 | 1 |
| 2310034G | 0,570285 | 0,001098 | 0,019 | 0,023 | 1 |
| Gm15879  | 0,570304 | -0,00976 | 0,015 | 0,011 | 1 |
| Polr2e   | 0,570306 | 0,026866 | 0,647 | 0,655 | 1 |
| Thoc1    | 0,570377 | -0,00741 | 0,226 | 0,239 | 1 |
| Bnip3    | 0,570539 | -0,00549 | 0,5   | 0,525 | 1 |
| BC025920 | 0,57067  | 0,011463 | 0,048 | 0,042 | 1 |
| Phf7     | 0,570742 | 0,007721 | 0,057 | 0,05  | 1 |

|           |          |          |       |       |   |
|-----------|----------|----------|-------|-------|---|
| Gm15420   | 0,570851 | 0,003295 | 0,015 | 0,011 | 1 |
| Tmem185a  | 0,570868 | -0,01209 | 0,128 | 0,137 | 1 |
| Bmp1      | 0,570904 | 0,01367  | 0,262 | 0,249 | 1 |
| Ndufab1   | 0,570909 | -0,01206 | 0,836 | 0,841 | 1 |
| 17000080l | 0,57104  | 0,003621 | 0,015 | 0,011 | 1 |
| Bfsp1     | 0,571083 | 0,008671 | 0,043 | 0,037 | 1 |
| Aplf      | 0,571103 | -0,00096 | 0,085 | 0,094 | 1 |
| Rap1b     | 0,571113 | 0,01694  | 0,568 | 0,554 | 1 |
| Ehd1      | 0,571188 | -0,01599 | 0,667 | 0,691 | 1 |
| Eif3b     | 0,571492 | -0,00567 | 0,581 | 0,598 | 1 |
| Ybx1      | 0,571879 | -0,00573 | 0,983 | 0,987 | 1 |
| Actr3     | 0,572004 | 0,021744 | 0,748 | 0,758 | 1 |
| Zfp965    | 0,572144 | 0,003621 | 0,015 | 0,011 | 1 |
| Acot1     | 0,572192 | 0,01938  | 0,575 | 0,592 | 1 |
| Klc4      | 0,572255 | -0,00813 | 0,079 | 0,086 | 1 |
| Zfp369    | 0,572353 | 0,002202 | 0,133 | 0,145 | 1 |
| Usp47     | 0,572624 | -0,00865 | 0,417 | 0,436 | 1 |
| Polg      | 0,572635 | 0,013074 | 0,188 | 0,177 | 1 |
| Tmem136   | 0,573047 | -0,00551 | 0,022 | 0,026 | 1 |
| B4galt2   | 0,573222 | 0,004667 | 0,078 | 0,07  | 1 |
| Slc25a19  | 0,573346 | 0,030535 | 0,34  | 0,333 | 1 |
| Atp5c1    | 0,573753 | 0,0216   | 0,939 | 0,94  | 1 |
| Hist3h2a  | 0,573786 | 0,000594 | 0,362 | 0,384 | 1 |
| Ilvbl     | 0,573798 | 0,013647 | 0,681 | 0,668 | 1 |
| Cacng5    | 0,573874 | -0,01205 | 0,035 | 0,041 | 1 |
| Atxn10    | 0,573927 | -0,01142 | 0,787 | 0,785 | 1 |
| Tmem29    | 0,574271 | 0,014461 | 0,211 | 0,2   | 1 |
| Nap1l1    | 0,574286 | 0,041269 | 0,728 | 0,711 | 1 |
| Usp13     | 0,574377 | 0,005871 | 0,034 | 0,029 | 1 |
| Mark4     | 0,574494 | -0,00355 | 0,201 | 0,215 | 1 |
| Ccdc18    | 0,574519 | 0,00014  | 0,019 | 0,023 | 1 |
| Por       | 0,574897 | 0,023549 | 0,445 | 0,429 | 1 |
| Gm26766   | 0,575099 | 0,001052 | 0,015 | 0,011 | 1 |
| Glrx3     | 0,57512  | 0,019731 | 0,71  | 0,701 | 1 |
| A730011C: | 0,575121 | 0,001729 | 0,019 | 0,023 | 1 |
| 5033421B: | 0,575771 | -0,00386 | 0,052 | 0,059 | 1 |
| Pop1      | 0,575819 | 0,008253 | 0,076 | 0,085 | 1 |
| Stn1      | 0,575847 | 0,009879 | 0,187 | 0,176 | 1 |
| CT025619. | 0,576224 | -0,01795 | 0,23  | 0,241 | 1 |
| Znrf2     | 0,576318 | 0,000213 | 0,122 | 0,132 | 1 |
| Gpt       | 0,576378 | 0,040379 | 0,524 | 0,527 | 1 |
| Ap4s1     | 0,57638  | -0,01442 | 0,367 | 0,382 | 1 |
| Plaa      | 0,576384 | 0,005398 | 0,287 | 0,302 | 1 |
| AC151836. | 0,576392 | 8,49E-05 | 0,015 | 0,011 | 1 |
| Cmss1     | 0,576414 | 0,012507 | 0,206 | 0,195 | 1 |
| Stx18     | 0,576448 | -0,00438 | 0,351 | 0,369 | 1 |
| Slc35b2   | 0,576548 | -0,00852 | 0,367 | 0,387 | 1 |
| Olfm12b   | 0,576611 | -0,01686 | 0,221 | 0,231 | 1 |
| Kif3b     | 0,576829 | -0,00451 | 0,145 | 0,156 | 1 |
| Mpped2    | 0,577066 | -0,00737 | 0,081 | 0,089 | 1 |
| Zeb2os    | 0,577158 | 0,002146 | 0,239 | 0,254 | 1 |
| Yes1      | 0,577209 | 0,004263 | 0,167 | 0,156 | 1 |

|           |          |          |       |       |   |
|-----------|----------|----------|-------|-------|---|
| Pex6      | 0,577252 | 0,021915 | 0,345 | 0,337 | 1 |
| Mtmr7     | 0,577272 | 0,010291 | 0,032 | 0,028 | 1 |
| Il6st     | 0,577279 | 0,032846 | 0,541 | 0,524 | 1 |
| Tpr       | 0,577369 | 0,041964 | 0,87  | 0,873 | 1 |
| Dnajb12   | 0,577558 | -0,00878 | 0,552 | 0,576 | 1 |
| Dync2li1  | 0,577584 | -0,00761 | 0,136 | 0,146 | 1 |
| Wdr4      | 0,5776   | -0,00941 | 0,094 | 0,102 | 1 |
| Cyfp2     | 0,577659 | -0,02641 | 0,308 | 0,32  | 1 |
| Mettl26   | 0,577677 | 0,004658 | 0,417 | 0,447 | 1 |
| Gm17655   | 0,577751 | -0,00063 | 0,044 | 0,05  | 1 |
| Zfp580    | 0,57786  | -0,00389 | 0,26  | 0,275 | 1 |
| Gla       | 0,57789  | -0,00082 | 0,138 | 0,15  | 1 |
| Hnrnpa2b1 | 0,577976 | -0,01649 | 0,998 | 1     | 1 |
| Furin     | 0,578141 | -0,01051 | 0,226 | 0,237 | 1 |
| Plod3     | 0,578198 | -0,00621 | 0,436 | 0,452 | 1 |
| Ltbp3     | 0,578633 | -0,01138 | 0,046 | 0,052 | 1 |
| Tmem106c  | 0,578796 | -0,00244 | 0,406 | 0,429 | 1 |
| Itch      | 0,578969 | -0,00942 | 0,912 | 0,906 | 1 |
| Nacad     | 0,578999 | -0,00974 | 0,582 | 0,597 | 1 |
| Chmp5     | 0,579061 | 0,018143 | 0,87  | 0,87  | 1 |
| lpmk      | 0,57924  | 0,032879 | 0,239 | 0,231 | 1 |
| Farp2     | 0,579252 | 0,001494 | 0,104 | 0,114 | 1 |
| Fastk     | 0,579356 | 0,01456  | 0,296 | 0,285 | 1 |
| Tsr1      | 0,57937  | -0,01076 | 0,083 | 0,091 | 1 |
| Nlgn2     | 0,579468 | 0,011032 | 0,199 | 0,189 | 1 |
| Lipt2     | 0,579763 | -0,02054 | 0,112 | 0,12  | 1 |
| Phactr4   | 0,580003 | -0,00067 | 0,522 | 0,545 | 1 |
| Gm45447   | 0,5802   | 0,006837 | 0,013 | 0,01  | 1 |
| 2210008FC | 0,5802   | 0,006837 | 0,013 | 0,01  | 1 |
| Sned1     | 0,580232 | 0,036766 | 0,286 | 0,276 | 1 |
| Grn       | 0,580415 | 0,022296 | 0,495 | 0,493 | 1 |
| Rita1     | 0,580463 | 0,018843 | 0,1   | 0,093 | 1 |
| Scaf8     | 0,580508 | 0,003227 | 0,341 | 0,358 | 1 |
| E430024I0 | 0,580581 | 0,011386 | 0,062 | 0,055 | 1 |
| Sclt1     | 0,580912 | -0,00126 | 0,213 | 0,228 | 1 |
| Mrpl3     | 0,580932 | -0,02046 | 0,341 | 0,351 | 1 |
| Jkamp     | 0,580932 | 0,025107 | 0,625 | 0,633 | 1 |
| Tspyl2    | 0,580978 | 0,01913  | 0,372 | 0,361 | 1 |
| Metrn1    | 0,581001 | 0,010355 | 0,013 | 0,01  | 1 |
| Mettl5    | 0,581065 | -0,00286 | 0,246 | 0,262 | 1 |
| Zfp692    | 0,581231 | 0,024889 | 0,197 | 0,189 | 1 |
| Ero1l     | 0,58127  | 0,014538 | 0,365 | 0,348 | 1 |
| Fam173a   | 0,581379 | 0,025807 | 0,663 | 0,663 | 1 |
| 1110004EC | 0,581498 | 0,023455 | 0,293 | 0,286 | 1 |
| Pnmal2    | 0,58156  | 0,000714 | 0,058 | 0,065 | 1 |
| Snx7      | 0,581608 | 0,00818  | 0,12  | 0,111 | 1 |
| Rpl7a     | 0,5817   | 0,019641 | 0,972 | 0,976 | 1 |
| Ppia      | 0,581882 | 0,011552 | 1     | 1     | 1 |
| Ubr3      | 0,581984 | -0,01791 | 0,596 | 0,616 | 1 |
| Wrb       | 0,582025 | -0,01854 | 0,294 | 0,304 | 1 |
| Aaas      | 0,582039 | 0,01305  | 0,128 | 0,119 | 1 |
| Zfyve9    | 0,582087 | 0,007482 | 0,405 | 0,429 | 1 |

|           |          |          |       |       |   |
|-----------|----------|----------|-------|-------|---|
| Tomm6     | 0,582189 | 0,027262 | 0,47  | 0,462 | 1 |
| Fnbp1     | 0,582269 | -0,0203  | 0,997 | 0,998 | 1 |
| Rock1     | 0,582307 | -0,00768 | 0,847 | 0,86  | 1 |
| Garem1    | 0,582327 | -0,01013 | 0,15  | 0,161 | 1 |
| Ttc7      | 0,582332 | -0,00362 | 0,113 | 0,122 | 1 |
| Nhlrc4    | 0,582396 | -0,00886 | 0,029 | 0,034 | 1 |
| Mss51     | 0,582399 | 0,002017 | 0,013 | 0,01  | 1 |
| Cog4      | 0,582407 | -0,00892 | 0,41  | 0,424 | 1 |
| Tmx4      | 0,582536 | -0,01827 | 0,516 | 0,522 | 1 |
| Nlrc3     | 0,582595 | 0,004904 | 0,013 | 0,01  | 1 |
| 49324350  | 0,582595 | 0,003937 | 0,013 | 0,01  | 1 |
| Ociad2    | 0,5826   | 0,006513 | 0,013 | 0,01  | 1 |
| Mtif3     | 0,582777 | -0,00303 | 0,2   | 0,213 | 1 |
| N4bp1     | 0,583027 | -0,01725 | 0,301 | 0,314 | 1 |
| Naaladl2  | 0,583172 | -0,01787 | 0,139 | 0,148 | 1 |
| Zfp105    | 0,583396 | -0,01265 | 0,046 | 0,052 | 1 |
| Rims2     | 0,583418 | -0,00951 | 0,046 | 0,052 | 1 |
| Ipo5      | 0,583421 | 0,036079 | 0,591 | 0,593 | 1 |
| 1700020L2 | 0,583488 | -0,01165 | 0,065 | 0,072 | 1 |
| Chka      | 0,583816 | 0,145801 | 0,518 | 0,512 | 1 |
| Scube3    | 0,583872 | -0,01154 | 0,096 | 0,104 | 1 |
| Aldh3a2   | 0,583931 | -0,00678 | 0,421 | 0,444 | 1 |
| Hddc2     | 0,584397 | 0,001689 | 0,013 | 0,01  | 1 |
| Zfp384    | 0,584463 | -0,00892 | 0,183 | 0,193 | 1 |
| Nipsnap1  | 0,5847   | 0,003922 | 0,15  | 0,14  | 1 |
| Ift46     | 0,58475  | 0,01916  | 0,353 | 0,345 | 1 |
| Tmem167   | 0,584992 | -0,00774 | 0,628 | 0,641 | 1 |
| Sergef    | 0,585025 | -0,00641 | 0,149 | 0,159 | 1 |
| Olfr1322  | 0,585198 | 0,002328 | 0,013 | 0,01  | 1 |
| Zfp738    | 0,585213 | -0,00332 | 0,235 | 0,249 | 1 |
| Vps4b     | 0,585258 | 0,024916 | 0,567 | 0,563 | 1 |
| Nkap      | 0,585346 | 0,00291  | 0,547 | 0,558 | 1 |
| Lcmt1     | 0,585386 | -0,01667 | 0,392 | 0,402 | 1 |
| Rnf219    | 0,585465 | -0,02078 | 0,092 | 0,099 | 1 |
| Gm42893   | 0,585474 | 0,007765 | 0,032 | 0,028 | 1 |
| Tenm4     | 0,585515 | -0,03349 | 0,142 | 0,15  | 1 |
| Meaf6     | 0,585596 | 0,020661 | 0,483 | 0,472 | 1 |
| Hist4h4   | 0,585618 | 0,012754 | 0,032 | 0,028 | 1 |
| Sdhc      | 0,585652 | -0,01298 | 0,664 | 0,673 | 1 |
| Irak4     | 0,586042 | -0,01304 | 0,104 | 0,112 | 1 |
| Uppt      | 0,586201 | 0,003621 | 0,013 | 0,01  | 1 |
| Fam114a1  | 0,586331 | -0,00799 | 0,049 | 0,055 | 1 |
| Klk10     | 0,586399 | 0,001359 | 0,013 | 0,01  | 1 |
| Gm9493    | 0,586601 | 0,005871 | 0,024 | 0,02  | 1 |
| AC123870  | 0,586607 | 0,006189 | 0,024 | 0,02  | 1 |
| B4galnt1  | 0,586748 | 0,018236 | 0,051 | 0,046 | 1 |
| Unk       | 0,58677  | 0,035965 | 0,245 | 0,239 | 1 |
| Mthfd1l   | 0,587037 | -0,00717 | 0,083 | 0,091 | 1 |
| Gm49130   | 0,587041 | -0,00764 | 0,032 | 0,037 | 1 |
| Coro7     | 0,587303 | -0,01151 | 0,29  | 0,304 | 1 |
| Prmt2     | 0,587309 | 0,026423 | 0,501 | 0,501 | 1 |
| Lgals8    | 0,587437 | -0,00638 | 0,441 | 0,452 | 1 |



|           |          |          |       |       |   |
|-----------|----------|----------|-------|-------|---|
| Rnf138    | 0,587508 | 0,011373 | 0,336 | 0,325 | 1 |
| Mocs2     | 0,587669 | 0,016084 | 0,52  | 0,498 | 1 |
| Epb4111   | 0,587802 | 0,029311 | 0,501 | 0,489 | 1 |
| Bace2     | 0,587806 | -0,00639 | 0,143 | 0,154 | 1 |
| Man1a2    | 0,587964 | -0,01727 | 0,48  | 0,489 | 1 |
| Soat1     | 0,588046 | 0,004619 | 0,219 | 0,234 | 1 |
| Slc52a2   | 0,588071 | -0,01955 | 0,153 | 0,163 | 1 |
| Nceh1     | 0,588238 | 0,038562 | 0,6   | 0,595 | 1 |
| Dnaaf5    | 0,588248 | -0,01155 | 0,143 | 0,153 | 1 |
| D830035M  | 0,588264 | -0,00608 | 0,006 | 0,008 | 1 |
| Acsl4     | 0,588327 | 0,026609 | 0,198 | 0,189 | 1 |
| Raf1      | 0,58836  | 0,012075 | 0,59  | 0,564 | 1 |
| Polr1c    | 0,588404 | 0,010706 | 0,245 | 0,234 | 1 |
| Entpd6    | 0,58852  | -0,01008 | 0,073 | 0,08  | 1 |
| A730071L1 | 0,588527 | -0,00545 | 0,006 | 0,008 | 1 |
| Tsen15    | 0,588543 | 0,011616 | 0,167 | 0,156 | 1 |
| Mrps30    | 0,588668 | -0,00362 | 0,206 | 0,22  | 1 |
| Parp6     | 0,588717 | 0,00668  | 0,165 | 0,177 | 1 |
| Hadh      | 0,588843 | 0,015682 | 0,782 | 0,771 | 1 |
| 2010015M  | 0,588856 | 0,007444 | 0,032 | 0,028 | 1 |
| Srrt      | 0,588862 | -0,01095 | 0,424 | 0,439 | 1 |
| Arpc3     | 0,588886 | 0,02815  | 0,727 | 0,751 | 1 |
| Snapc4    | 0,588928 | 0,005871 | 0,082 | 0,075 | 1 |
| Wdr73     | 0,588934 | -0,00188 | 0,116 | 0,125 | 1 |
| Leng9     | 0,589114 | 0,01585  | 0,128 | 0,119 | 1 |
| Hnrnp3    | 0,58914  | 0,015736 | 0,688 | 0,675 | 1 |
| Tmf1      | 0,589222 | 0,00718  | 0,76  | 0,784 | 1 |
| Rnf144b   | 0,589581 | -0,00608 | 0,006 | 0,008 | 1 |
| Snf8      | 0,589609 | 0,028257 | 0,619 | 0,626 | 1 |
| Bod1      | 0,589656 | -0,01002 | 0,47  | 0,491 | 1 |
| 2410131K  | 0,589752 | 0,005302 | 0,129 | 0,14  | 1 |
| Cplx2     | 0,589845 | -0,00447 | 0,006 | 0,008 | 1 |
| Tmem123   | 0,589893 | 0,010885 | 0,522 | 0,512 | 1 |
| Slc25a25  | 0,590028 | 0,007086 | 0,069 | 0,062 | 1 |
| 1700030J2 | 0,590107 | -0,00384 | 0,006 | 0,008 | 1 |
| Nudt5     | 0,590325 | -0,00231 | 0,33  | 0,346 | 1 |
| Smarcd2   | 0,590361 | -0,0118  | 0,173 | 0,182 | 1 |
| Ptbp2     | 0,590558 | 0,019838 | 0,645 | 0,637 | 1 |
| Reep3     | 0,590581 | 0,024064 | 0,991 | 0,997 | 1 |
| Afg3l1    | 0,590636 | 0,025389 | 0,477 | 0,47  | 1 |
| Atp5a1    | 0,590874 | 0,021957 | 0,983 | 0,985 | 1 |
| Btbd16    | 0,590885 | -0,00968 | 0,059 | 0,052 | 1 |
| Sema4f    | 0,5909   | -0,01239 | 0,006 | 0,008 | 1 |
| Dnlz      | 0,590989 | -0,01431 | 0,509 | 0,522 | 1 |
| Sbf2      | 0,59113  | -0,00917 | 0,532 | 0,537 | 1 |
| Kdm4d     | 0,591427 | -0,00286 | 0,006 | 0,008 | 1 |
| BC051142  | 0,591455 | 0,004918 | 0,024 | 0,02  | 1 |
| Mfsd3     | 0,59148  | 0,01103  | 0,125 | 0,115 | 1 |
| Pdk3      | 0,591509 | 0,013172 | 0,346 | 0,367 | 1 |
| Pcdhb19   | 0,591602 | 0,018293 | 0,065 | 0,059 | 1 |
| Pcsk7     | 0,591673 | 0,007385 | 0,225 | 0,241 | 1 |
| Anks1b    | 0,591678 | 0,02269  | 0,925 | 0,92  | 1 |

|            |          |          |       |       |   |
|------------|----------|----------|-------|-------|---|
| Gria3      | 0,59169  | -0,00223 | 0,006 | 0,008 | 1 |
| Vmn1r4     | 0,59169  | -0,00223 | 0,006 | 0,008 | 1 |
| Hexa       | 0,591726 | 0,023835 | 0,637 | 0,634 | 1 |
| Nin        | 0,591872 | 0,002202 | 0,119 | 0,128 | 1 |
| Rccd1      | 0,591934 | 0,002136 | 0,172 | 0,185 | 1 |
| Pam        | 0,592323 | -0,01792 | 0,548 | 0,556 | 1 |
| 2700033N:  | 0,59247  | 0,012006 | 0,058 | 0,052 | 1 |
| Luzp1      | 0,592476 | 0,015123 | 0,083 | 0,076 | 1 |
| 1700021N:  | 0,592484 | -0,00252 | 0,006 | 0,008 | 1 |
| Brpf3      | 0,592527 | 0,01731  | 0,105 | 0,098 | 1 |
| Prim2      | 0,592619 | 0,001914 | 0,131 | 0,141 | 1 |
| Zfp932     | 0,592721 | -0,01011 | 0,223 | 0,234 | 1 |
| Dchs1      | 0,592748 | -0,00219 | 0,006 | 0,008 | 1 |
| Pipox      | 0,592835 | 0,007408 | 0,06  | 0,054 | 1 |
| Nudt6      | 0,592885 | -0,01297 | 0,078 | 0,085 | 1 |
| Phtf1os    | 0,593011 | -0,00125 | 0,006 | 0,008 | 1 |
| Gm33148    | 0,593011 | -0,00125 | 0,006 | 0,008 | 1 |
| Pih1d2     | 0,593011 | -0,00125 | 0,006 | 0,008 | 1 |
| Tex22      | 0,593011 | -0,00125 | 0,006 | 0,008 | 1 |
| Gm14964    | 0,593011 | -0,00125 | 0,006 | 0,008 | 1 |
| Glt28d2    | 0,593159 | 0,006837 | 0,011 | 0,008 | 1 |
| 2310022A:  | 0,593336 | -0,01527 | 0,128 | 0,137 | 1 |
| Dzank1     | 0,593372 | -0,01723 | 0,095 | 0,102 | 1 |
| Fkbp8      | 0,593452 | 0,014101 | 0,93  | 0,94  | 1 |
| Gga3       | 0,593465 | 0,020538 | 0,203 | 0,193 | 1 |
| Mex3d      | 0,593626 | 0,024372 | 0,277 | 0,268 | 1 |
| Gid8       | 0,593728 | -0,01072 | 0,299 | 0,311 | 1 |
| Mageh1     | 0,593775 | 0,028103 | 0,386 | 0,385 | 1 |
| Rgs7bp     | 0,59407  | -0,00092 | 0,006 | 0,008 | 1 |
| D630045J1  | 0,594101 | 0,004918 | 0,024 | 0,02  | 1 |
| Aida       | 0,594111 | -0,03076 | 0,338 | 0,341 | 1 |
| Stag2      | 0,594172 | -0,00442 | 0,75  | 0,766 | 1 |
| Zfp236     | 0,594215 | 0,009459 | 0,23  | 0,218 | 1 |
| Stom       | 0,594254 | 0,008448 | 0,011 | 0,008 | 1 |
| Bid        | 0,594254 | 0,00458  | 0,011 | 0,008 | 1 |
| Adam8      | 0,594254 | 0,00458  | 0,011 | 0,008 | 1 |
| Cdh24      | 0,594254 | 0,00458  | 0,011 | 0,008 | 1 |
| AL589692.  | 0,594254 | 0,00458  | 0,011 | 0,008 | 1 |
| Pakap      | 0,594256 | 0,006837 | 0,011 | 0,008 | 1 |
| Cdc42ep3   | 0,594334 | 0,001028 | 0,006 | 0,008 | 1 |
| Shcbp1l    | 0,59451  | 0,008799 | 0,099 | 0,091 | 1 |
| Usp37      | 0,59451  | 0,033464 | 0,325 | 0,317 | 1 |
| Strn3      | 0,594758 | -0,01484 | 0,66  | 0,67  | 1 |
| Limk1      | 0,594812 | -0,00271 | 0,119 | 0,128 | 1 |
| Lin37      | 0,595034 | 0,017009 | 0,2   | 0,19  | 1 |
| Dhrs13os   | 0,595135 | 0,004262 | 0,011 | 0,008 | 1 |
| Ap1s2      | 0,595287 | 0,010879 | 0,148 | 0,138 | 1 |
| Lrrc75aos2 | 0,595352 | 0,006516 | 0,011 | 0,008 | 1 |
| Gm44718    | 0,595352 | 0,00361  | 0,011 | 0,008 | 1 |
| Slc1a4     | 0,595352 | 0,00361  | 0,011 | 0,008 | 1 |
| Gm17035    | 0,595352 | 0,00361  | 0,011 | 0,008 | 1 |
| Gnal       | 0,595352 | 0,00361  | 0,011 | 0,008 | 1 |

|           |          |          |       |       |   |
|-----------|----------|----------|-------|-------|---|
| Adgre5    | 0,595354 | 0,004904 | 0,011 | 0,008 | 1 |
| Krr1      | 0,595694 | 0,03174  | 0,326 | 0,317 | 1 |
| Chchd4    | 0,595748 | -0,00576 | 0,306 | 0,32  | 1 |
| Hsd17b7   | 0,595805 | 0,060547 | 0,359 | 0,353 | 1 |
| Cds2      | 0,595863 | -0,02904 | 0,725 | 0,73  | 1 |
| Arid5a    | 0,595998 | 0,053454 | 0,242 | 0,233 | 1 |
| Rp9       | 0,596065 | 0,03186  | 0,558 | 0,541 | 1 |
| Zfpm1     | 0,596188 | -0,02208 | 0,45  | 0,454 | 1 |
| Hdac6     | 0,596309 | 0,01535  | 0,117 | 0,109 | 1 |
| Pld2      | 0,596425 | 0,023736 | 0,134 | 0,127 | 1 |
| 1700007G  | 0,596451 | 0,00264  | 0,011 | 0,008 | 1 |
| 1700112J1 | 0,596451 | 0,00264  | 0,011 | 0,008 | 1 |
| Zfp882    | 0,596451 | -0,01333 | 0,128 | 0,137 | 1 |
| Golt1b    | 0,596539 | -0,00175 | 0,367 | 0,389 | 1 |
| 4930518I1 | 0,596565 | -0,00966 | 0,04  | 0,046 | 1 |
| Gsk3a     | 0,596618 | 0,018505 | 0,629 | 0,618 | 1 |
| Fxyd1     | 0,596664 | 0,014701 | 0,207 | 0,221 | 1 |
| Prss53    | 0,59676  | -0,00484 | 0,029 | 0,034 | 1 |
| Rab6a     | 0,596768 | 0,023182 | 0,956 | 0,953 | 1 |
| Prelid3a  | 0,596859 | 0,005005 | 0,111 | 0,102 | 1 |
| Il11ra1   | 0,596999 | -0,00846 | 0,166 | 0,176 | 1 |
| Gm10827   | 0,597024 | -0,0057  | 0,064 | 0,057 | 1 |
| Gstk1     | 0,597178 | 0,013443 | 0,296 | 0,285 | 1 |
| Fbxo45    | 0,597185 | -0,01158 | 0,314 | 0,325 | 1 |
| Nfyb      | 0,59721  | -0,0006  | 0,354 | 0,372 | 1 |
| Miip      | 0,597228 | 0,014681 | 0,105 | 0,098 | 1 |
| Prdx6     | 0,597475 | -0,00985 | 0,705 | 0,717 | 1 |
| Rps27a    | 0,597482 | 0,011109 | 0,999 | 1     | 1 |
| Trdmt1    | 0,597664 | -0,00233 | 0,094 | 0,102 | 1 |
| Agpat2    | 0,597743 | 0,009691 | 0,022 | 0,018 | 1 |
| Mios      | 0,597775 | 0,001241 | 0,165 | 0,176 | 1 |
| Yif1a     | 0,597824 | -0,00808 | 0,565 | 0,574 | 1 |
| Slf2      | 0,597853 | 0,014145 | 0,429 | 0,413 | 1 |
| Lrch3     | 0,597885 | -0,00286 | 0,381 | 0,4   | 1 |
| Mgst1     | 0,597994 | 0,00039  | 0,011 | 0,008 | 1 |
| Arpc2     | 0,598233 | 0,032721 | 0,847 | 0,834 | 1 |
| Mms19     | 0,598528 | -0,00587 | 0,18  | 0,19  | 1 |
| Ap5z1     | 0,598805 | -0,00974 | 0,294 | 0,309 | 1 |
| Unc13b    | 0,598865 | 0,010722 | 0,065 | 0,059 | 1 |
| 2810442N  | 0,598874 | 0,001028 | 0,011 | 0,008 | 1 |
| 8030442B  | 0,598874 | 0,001028 | 0,011 | 0,008 | 1 |
| Nyap1     | 0,599097 | 0,001359 | 0,011 | 0,008 | 1 |
| Las1l     | 0,599126 | 0,016876 | 0,41  | 0,393 | 1 |
| Cebpd     | 0,599212 | 0,046939 | 0,294 | 0,293 | 1 |
| Gpr108    | 0,599376 | -0,02106 | 0,426 | 0,433 | 1 |
| Plin2     | 0,599381 | -0,01622 | 0,122 | 0,13  | 1 |
| Zfp521    | 0,599417 | -0,00112 | 0,024 | 0,02  | 1 |
| Ndufs7    | 0,599632 | -0,01667 | 0,959 | 0,959 | 1 |
| Glrx2     | 0,599685 | 0,005538 | 0,575 | 0,611 | 1 |
| Lsm4      | 0,599717 | -0,01015 | 0,674 | 0,68  | 1 |
| Gm28782   | 0,599742 | -0,00502 | 0,043 | 0,049 | 1 |
| Cyb5r4    | 0,599814 | 0,007662 | 0,224 | 0,211 | 1 |

|           |          |          |       |       |   |
|-----------|----------|----------|-------|-------|---|
| Dars2     | 0,599865 | 0,000316 | 0,103 | 0,112 | 1 |
| Cryzl2    | 0,600102 | -0,02382 | 0,226 | 0,233 | 1 |
| Fam98c    | 0,600176 | 0,018391 | 0,211 | 0,202 | 1 |
| Arhgap29  | 0,60021  | 0,008098 | 0,022 | 0,018 | 1 |
| Morf4l2   | 0,600544 | 0,016303 | 0,745 | 0,78  | 1 |
| Xrcc6     | 0,600593 | 0,022961 | 0,309 | 0,301 | 1 |
| Lgals4    | 0,600886 | 0,006805 | 0,046 | 0,041 | 1 |
| Sufu      | 0,601014 | 0,002107 | 0,109 | 0,119 | 1 |
| Kcnab2    | 0,601038 | -0,00934 | 0,024 | 0,028 | 1 |
| Il4ra     | 0,601102 | 0,00327  | 0,003 | 0,002 | 1 |
| Fndc9     | 0,601102 | 0,00327  | 0,003 | 0,002 | 1 |
| Cenph     | 0,601102 | 0,00327  | 0,003 | 0,002 | 1 |
| AW011738  | 0,601102 | 0,005221 | 0,003 | 0,002 | 1 |
| Gm15402   | 0,601102 | 0,005221 | 0,003 | 0,002 | 1 |
| Ak9       | 0,601102 | 0,005221 | 0,003 | 0,002 | 1 |
| Hoxb5     | 0,601102 | 0,005221 | 0,003 | 0,002 | 1 |
| Ntrk3     | 0,601102 | 0,004246 | 0,003 | 0,002 | 1 |
| Vldlr     | 0,601132 | 0,040566 | 0,887 | 0,889 | 1 |
| Snrpd1    | 0,601284 | -0,00066 | 0,578 | 0,585 | 1 |
| Lrrc73    | 0,601302 | -0,00058 | 0,011 | 0,008 | 1 |
| Prpf40b   | 0,601354 | -0,00108 | 0,211 | 0,224 | 1 |
| Gpatch4   | 0,601363 | -0,00283 | 0,158 | 0,169 | 1 |
| Fdx1      | 0,601424 | -0,01756 | 0,289 | 0,301 | 1 |
| Rln1      | 0,601541 | 0,005221 | 0,003 | 0,002 | 1 |
| Adamts9   | 0,601541 | 0,004246 | 0,003 | 0,002 | 1 |
| Lpl       | 0,601541 | 0,004246 | 0,003 | 0,002 | 1 |
| Cox6a2    | 0,601541 | 0,00327  | 0,003 | 0,002 | 1 |
| Piwil4    | 0,601541 | 0,00327  | 0,003 | 0,002 | 1 |
| Copz2     | 0,601541 | 0,00327  | 0,003 | 0,002 | 1 |
| Fam84a    | 0,601541 | 0,00327  | 0,003 | 0,002 | 1 |
| Mdh1b     | 0,601541 | 0,002293 | 0,003 | 0,002 | 1 |
| Apoa2     | 0,601541 | 0,002293 | 0,003 | 0,002 | 1 |
| Pld5      | 0,601541 | 0,002293 | 0,003 | 0,002 | 1 |
| Gm26869   | 0,601541 | 0,002293 | 0,003 | 0,002 | 1 |
| Tsx       | 0,601541 | 0,002293 | 0,003 | 0,002 | 1 |
| Hfm1      | 0,601541 | 0,002293 | 0,003 | 0,002 | 1 |
| 1700001JC | 0,601541 | 0,002293 | 0,003 | 0,002 | 1 |
| Vmn1r47   | 0,601541 | 0,002293 | 0,003 | 0,002 | 1 |
| Phyhip    | 0,601541 | 0,002293 | 0,003 | 0,002 | 1 |
| Spsb4     | 0,601541 | 0,002293 | 0,003 | 0,002 | 1 |
| Gm12319   | 0,601541 | 0,002293 | 0,003 | 0,002 | 1 |
| Ccl28     | 0,601541 | 0,002293 | 0,003 | 0,002 | 1 |
| Krt83     | 0,601541 | 0,002293 | 0,003 | 0,002 | 1 |
| Vasn      | 0,601541 | 0,002293 | 0,003 | 0,002 | 1 |
| Gm10226   | 0,601541 | 0,002293 | 0,003 | 0,002 | 1 |
| E230001N  | 0,601541 | 0,002293 | 0,003 | 0,002 | 1 |
| Ebi3      | 0,601541 | 0,002293 | 0,003 | 0,002 | 1 |
| Arhgap28  | 0,601541 | 0,002293 | 0,003 | 0,002 | 1 |
| Cd74      | 0,601541 | 0,002293 | 0,003 | 0,002 | 1 |
| Eno4      | 0,601541 | 0,002293 | 0,003 | 0,002 | 1 |
| 4930430FC | 0,601555 | 0,006075 | 0,407 | 0,429 | 1 |
| Srpr      | 0,601565 | 0,015795 | 0,56  | 0,543 | 1 |

|           |          |          |       |       |   |
|-----------|----------|----------|-------|-------|---|
| Bcor1     | 0,60172  | 0,038028 | 0,355 | 0,35  | 1 |
| Polr2g    | 0,60178  | 0,001597 | 0,647 | 0,686 | 1 |
| Ap2b1     | 0,60195  | 0,013733 | 0,679 | 0,655 | 1 |
| 4930444P: | 0,601981 | 0,001315 | 0,003 | 0,002 | 1 |
| Mpp4      | 0,601981 | 0,001315 | 0,003 | 0,002 | 1 |
| Myl1      | 0,601981 | 0,001315 | 0,003 | 0,002 | 1 |
| Gm28535   | 0,601981 | 0,001315 | 0,003 | 0,002 | 1 |
| Gm29514   | 0,601981 | 0,001315 | 0,003 | 0,002 | 1 |
| Gm38037   | 0,601981 | 0,001315 | 0,003 | 0,002 | 1 |
| Gm13479   | 0,601981 | 0,001315 | 0,003 | 0,002 | 1 |
| Trp53i11  | 0,601981 | 0,001315 | 0,003 | 0,002 | 1 |
| Pax6      | 0,601981 | 0,001315 | 0,003 | 0,002 | 1 |
| Pabpc1l   | 0,601981 | 0,001315 | 0,003 | 0,002 | 1 |
| Cdh4      | 0,601981 | 0,001315 | 0,003 | 0,002 | 1 |
| Cybb      | 0,601981 | 0,001315 | 0,003 | 0,002 | 1 |
| Srpx      | 0,601981 | 0,001315 | 0,003 | 0,002 | 1 |
| Xlr4b     | 0,601981 | 0,001315 | 0,003 | 0,002 | 1 |
| Tifa      | 0,601981 | 0,001315 | 0,003 | 0,002 | 1 |
| Gm12394   | 0,601981 | 0,001315 | 0,003 | 0,002 | 1 |
| Gm26566   | 0,601981 | 0,001315 | 0,003 | 0,002 | 1 |
| Dnali1    | 0,601981 | 0,001315 | 0,003 | 0,002 | 1 |
| Csf3r     | 0,601981 | 0,001315 | 0,003 | 0,002 | 1 |
| Trnp1     | 0,601981 | 0,001315 | 0,003 | 0,002 | 1 |
| Rhd       | 0,601981 | 0,001315 | 0,003 | 0,002 | 1 |
| 9130230L2 | 0,601981 | 0,001315 | 0,003 | 0,002 | 1 |
| Gm16054   | 0,601981 | 0,001315 | 0,003 | 0,002 | 1 |
| Cxcl10    | 0,601981 | 0,001315 | 0,003 | 0,002 | 1 |
| Gm42902   | 0,601981 | 0,001315 | 0,003 | 0,002 | 1 |
| Scnn1a    | 0,601981 | 0,001315 | 0,003 | 0,002 | 1 |
| Vmn2r28   | 0,601981 | 0,001315 | 0,003 | 0,002 | 1 |
| Prss23    | 0,601981 | 0,001315 | 0,003 | 0,002 | 1 |
| Gm35082   | 0,601981 | 0,001315 | 0,003 | 0,002 | 1 |
| Plk1      | 0,601981 | 0,001315 | 0,003 | 0,002 | 1 |
| Chst11    | 0,601981 | 0,001315 | 0,003 | 0,002 | 1 |
| Rdh9      | 0,601981 | 0,001315 | 0,003 | 0,002 | 1 |
| Vmn2r87   | 0,601981 | 0,001315 | 0,003 | 0,002 | 1 |
| Gm35572   | 0,601981 | 0,001315 | 0,003 | 0,002 | 1 |
| Gm21817   | 0,601981 | 0,001315 | 0,003 | 0,002 | 1 |
| 4933406B: | 0,601981 | 0,001315 | 0,003 | 0,002 | 1 |
| Ces2b     | 0,601981 | 0,001315 | 0,003 | 0,002 | 1 |
| Fhod1     | 0,601981 | 0,001315 | 0,003 | 0,002 | 1 |
| Chst5     | 0,601981 | 0,001315 | 0,003 | 0,002 | 1 |
| A430057M  | 0,601981 | 0,001315 | 0,003 | 0,002 | 1 |
| Gm35835   | 0,601981 | 0,001315 | 0,003 | 0,002 | 1 |
| Exph5     | 0,601981 | 0,001315 | 0,003 | 0,002 | 1 |
| Gm38150   | 0,601981 | 0,001315 | 0,003 | 0,002 | 1 |
| 4732414G: | 0,601981 | 0,001315 | 0,003 | 0,002 | 1 |
| Dph1      | 0,601981 | 0,001315 | 0,003 | 0,002 | 1 |
| Hist1h2ak | 0,601981 | 0,001315 | 0,003 | 0,002 | 1 |
| Hist1h4i  | 0,601981 | 0,001315 | 0,003 | 0,002 | 1 |
| Hist1h2bf | 0,601981 | 0,001315 | 0,003 | 0,002 | 1 |
| Gm35725   | 0,601981 | 0,001315 | 0,003 | 0,002 | 1 |

|            |          |          |       |       |   |
|------------|----------|----------|-------|-------|---|
| Gm26531    | 0,601981 | 0,001315 | 0,003 | 0,002 | 1 |
| Ngb        | 0,601981 | 0,001315 | 0,003 | 0,002 | 1 |
| 9330161LC  | 0,601981 | 0,001315 | 0,003 | 0,002 | 1 |
| Ptger4     | 0,601981 | 0,001315 | 0,003 | 0,002 | 1 |
| Gm32618    | 0,601981 | 0,001315 | 0,003 | 0,002 | 1 |
| Cpt1b      | 0,601981 | 0,001315 | 0,003 | 0,002 | 1 |
| Igfbp6     | 0,601981 | 0,001315 | 0,003 | 0,002 | 1 |
| AC161607.  | 0,601981 | 0,001315 | 0,003 | 0,002 | 1 |
| Tmem30c    | 0,601981 | 0,001315 | 0,003 | 0,002 | 1 |
| Pcdha12    | 0,601981 | 0,001315 | 0,003 | 0,002 | 1 |
| Mcc        | 0,601981 | 0,001315 | 0,003 | 0,002 | 1 |
| Gm26742    | 0,601981 | 0,001315 | 0,003 | 0,002 | 1 |
| Golga7b    | 0,601981 | 0,001315 | 0,003 | 0,002 | 1 |
| Ssh3       | 0,602035 | 0,01004  | 0,213 | 0,2   | 1 |
| Vamp2      | 0,602195 | 0,024047 | 0,86  | 0,852 | 1 |
| Tnk1       | 0,602422 | 0,001648 | 0,003 | 0,002 | 1 |
| Zfp14      | 0,602479 | -0,01055 | 0,173 | 0,182 | 1 |
| Ppp2r2c    | 0,602489 | -0,00314 | 0,898 | 0,889 | 1 |
| A830052D   | 0,602511 | -0,00432 | 0,043 | 0,049 | 1 |
| Exoc1      | 0,602546 | -0,00078 | 0,421 | 0,444 | 1 |
| Tbc1d16    | 0,602546 | -0,00113 | 0,428 | 0,45  | 1 |
| Uimc1      | 0,602667 | -0,00338 | 0,293 | 0,309 | 1 |
| Ankrd13c   | 0,602716 | 0,013288 | 0,433 | 0,421 | 1 |
| Sfxn4      | 0,602976 | 0,002582 | 0,077 | 0,085 | 1 |
| Sdc3       | 0,602985 | 0,005551 | 0,022 | 0,018 | 1 |
| Gm28959    | 0,60299  | 0,005871 | 0,022 | 0,018 | 1 |
| Brd3os     | 0,603009 | -0,01078 | 0,048 | 0,054 | 1 |
| Lsm3       | 0,603105 | -0,02345 | 0,547 | 0,556 | 1 |
| Rrad       | 0,603253 | 0,012954 | 0,009 | 0,007 | 1 |
| Gm15675    | 0,603303 | -0,00031 | 0,003 | 0,002 | 1 |
| Tgm2       | 0,603303 | -0,00031 | 0,003 | 0,002 | 1 |
| Alpl       | 0,603303 | -0,00031 | 0,003 | 0,002 | 1 |
| D7Erttd128 | 0,603303 | -0,00031 | 0,003 | 0,002 | 1 |
| Cx3cl1     | 0,603303 | -0,00031 | 0,003 | 0,002 | 1 |
| Cabp7      | 0,603303 | -0,00031 | 0,003 | 0,002 | 1 |
| Hoxc10     | 0,603303 | -0,00031 | 0,003 | 0,002 | 1 |
| Ppp1r32    | 0,603303 | -0,00031 | 0,003 | 0,002 | 1 |
| Riad1      | 0,603303 | -0,00193 | 0,003 | 0,002 | 1 |
| Gm20420    | 0,603303 | -0,01283 | 0,003 | 0,002 | 1 |
| Cacna2d3   | 0,603371 | -0,00878 | 0,051 | 0,057 | 1 |
| Plekhn1    | 0,603403 | 0,012371 | 0,289 | 0,275 | 1 |
| Slc25a37   | 0,603561 | -0,01066 | 0,07  | 0,076 | 1 |
| Gpank1     | 0,603607 | 0,026517 | 0,223 | 0,216 | 1 |
| Tmem132k   | 0,60402  | -0,02383 | 0,513 | 0,527 | 1 |
| Sub1       | 0,604091 | 0,014685 | 0,726 | 0,738 | 1 |
| Scai       | 0,604254 | -0,01459 | 0,209 | 0,22  | 1 |
| Fyb        | 0,604285 | -0,00394 | 0,026 | 0,031 | 1 |
| Tes3-ps    | 0,6043   | 0,003368 | 0,039 | 0,034 | 1 |
| Asns       | 0,604376 | -0,00934 | 0,024 | 0,028 | 1 |
| Mmp17      | 0,604399 | -0,01053 | 0,009 | 0,011 | 1 |
| 1700019Dl  | 0,604444 | -0,01371 | 0,132 | 0,14  | 1 |
| Tcte2      | 0,605048 | -0,00048 | 0,065 | 0,072 | 1 |

|           |          |          |       |       |   |
|-----------|----------|----------|-------|-------|---|
| Tcta      | 0,605094 | 0,02734  | 0,276 | 0,27  | 1 |
| Ccdc74a   | 0,605215 | 0,005224 | 0,009 | 0,007 | 1 |
| Lpp       | 0,605215 | 0,006194 | 0,009 | 0,007 | 1 |
| 4933408B: | 0,605215 | 0,006194 | 0,009 | 0,007 | 1 |
| Map2k5    | 0,605496 | -0,00847 | 0,302 | 0,314 | 1 |
| Zfp219    | 0,60558  | -0,00633 | 0,08  | 0,088 | 1 |
| Man2c1os  | 0,605701 | 0,004923 | 0,03  | 0,026 | 1 |
| Nle1      | 0,605734 | 0,009534 | 0,065 | 0,059 | 1 |
| Ric8b     | 0,605879 | -0,00633 | 0,209 | 0,221 | 1 |
| Gm14698   | 0,605902 | 0,010209 | 0,051 | 0,046 | 1 |
| 0610030Ez | 0,605945 | -0,00938 | 0,335 | 0,348 | 1 |
| Ppp1r8    | 0,606075 | 0,029646 | 0,259 | 0,252 | 1 |
| Lrrc75a   | 0,606091 | 0,006189 | 0,022 | 0,018 | 1 |
| Zfp239    | 0,606121 | 0,031693 | 0,477 | 0,475 | 1 |
| 4930515Gf | 0,606196 | 0,004254 | 0,009 | 0,007 | 1 |
| Kcne4     | 0,606196 | 0,011991 | 0,009 | 0,007 | 1 |
| Apold1    | 0,606196 | 0,005224 | 0,009 | 0,007 | 1 |
| Phf5a     | 0,606316 | 0,010448 | 0,666 | 0,655 | 1 |
| Ralgds    | 0,606712 | 0,007518 | 0,937 | 0,92  | 1 |
| Exoc5     | 0,606794 | -0,01711 | 0,583 | 0,58  | 1 |
| Psmb7     | 0,606941 | -0,01585 | 0,851 | 0,857 | 1 |
| Smdt1     | 0,607001 | -0,01061 | 0,981 | 0,989 | 1 |
| Tceal8    | 0,607153 | 0,030001 | 0,327 | 0,319 | 1 |
| Muc1      | 0,607179 | 0,005224 | 0,009 | 0,007 | 1 |
| Katnal2   | 0,607179 | 0,004254 | 0,009 | 0,007 | 1 |
| Il23a     | 0,607179 | 0,003283 | 0,009 | 0,007 | 1 |
| Gm16279   | 0,607179 | 0,003283 | 0,009 | 0,007 | 1 |
| Pde10a    | 0,607205 | -0,002   | 0,026 | 0,031 | 1 |
| Creb3l4   | 0,607426 | 0,00361  | 0,009 | 0,007 | 1 |
| Psmd13    | 0,60767  | 0,0072   | 0,656 | 0,686 | 1 |
| Fam217b   | 0,607672 | 0,003937 | 0,009 | 0,007 | 1 |
| Gm10457   | 0,607673 | 0,005871 | 0,009 | 0,007 | 1 |
| Atp6v0e   | 0,60779  | 0,005576 | 0,685 | 0,717 | 1 |
| Ddx59     | 0,608136 | -0,00102 | 0,125 | 0,115 | 1 |
| Brinp1    | 0,60816  | -0,00614 | 0,002 | 0,003 | 1 |
| Rgs1      | 0,608162 | 0,00231  | 0,009 | 0,007 | 1 |
| Gm26801   | 0,608162 | 0,00231  | 0,009 | 0,007 | 1 |
| Acsm3     | 0,608162 | 0,00231  | 0,009 | 0,007 | 1 |
| Gm11520   | 0,608162 | 0,00231  | 0,009 | 0,007 | 1 |
| St3gal3   | 0,608218 | -0,02022 | 0,315 | 0,322 | 1 |
| Cpsf4     | 0,608224 | -0,00728 | 0,128 | 0,137 | 1 |
| Ddx20     | 0,608374 | 0,017084 | 0,098 | 0,091 | 1 |
| Eif3e     | 0,608406 | -0,00769 | 0,672 | 0,698 | 1 |
| Gtpbp3    | 0,608493 | -0,00334 | 0,146 | 0,156 | 1 |
| Stx2      | 0,60851  | -0,01954 | 0,264 | 0,273 | 1 |
| Zfp553    | 0,608535 | 0,028881 | 0,486 | 0,481 | 1 |
| Akt2      | 0,608833 | 0,021341 | 0,364 | 0,353 | 1 |
| Zfp658    | 0,608833 | 0,008352 | 0,051 | 0,046 | 1 |
| Rbm7      | 0,608862 | -0,0142  | 0,507 | 0,524 | 1 |
| Ubtd1     | 0,609023 | -0,00706 | 0,048 | 0,054 | 1 |
| Prrx1     | 0,609044 | -0,00291 | 0,002 | 0,003 | 1 |
| Gm14455   | 0,609044 | -0,00291 | 0,002 | 0,003 | 1 |

|           |          |          |       |       |   |
|-----------|----------|----------|-------|-------|---|
| Ror1      | 0,609044 | -0,00291 | 0,002 | 0,003 | 1 |
| 9430041J1 | 0,609044 | -0,00291 | 0,002 | 0,003 | 1 |
| Kcnc1     | 0,609044 | -0,00291 | 0,002 | 0,003 | 1 |
| Kcng4     | 0,609044 | -0,00291 | 0,002 | 0,003 | 1 |
| Gm47732   | 0,609044 | -0,00291 | 0,002 | 0,003 | 1 |
| Rnf182    | 0,609044 | -0,00291 | 0,002 | 0,003 | 1 |
| Gm30085   | 0,609044 | -0,00291 | 0,002 | 0,003 | 1 |
| Slc39a12  | 0,609044 | -0,00452 | 0,002 | 0,003 | 1 |
| Dyrk2     | 0,609044 | -0,00452 | 0,002 | 0,003 | 1 |
| Zfp872    | 0,609044 | -0,00452 | 0,002 | 0,003 | 1 |
| Bak1      | 0,609095 | -0,02143 | 0,249 | 0,257 | 1 |
| Gpld1     | 0,609105 | 0,00188  | 0,116 | 0,125 | 1 |
| Luzp2     | 0,609114 | -0,00624 | 0,363 | 0,38  | 1 |
| Capg      | 0,609148 | 0,00264  | 0,009 | 0,007 | 1 |
| Fxyd6     | 0,609278 | 0,007467 | 0,009 | 0,011 | 1 |
| Acadsb    | 0,609475 | 0,009982 | 0,395 | 0,42  | 1 |
| Pcdhb12   | 0,6095   | -0,00539 | 0,009 | 0,011 | 1 |
| Stx6      | 0,609507 | 0,025369 | 0,714 | 0,719 | 1 |
| Arnt2     | 0,609683 | 0,017518 | 0,829 | 0,833 | 1 |
| Slc4a2    | 0,609699 | -0,00818 | 0,747 | 0,769 | 1 |
| Dock7     | 0,60989  | 0,016907 | 0,205 | 0,195 | 1 |
| Eya1      | 0,60993  | -0,00129 | 0,002 | 0,003 | 1 |
| Gm37233   | 0,60993  | -0,00129 | 0,002 | 0,003 | 1 |
| A930018P  | 0,60993  | -0,00129 | 0,002 | 0,003 | 1 |
| Ano3      | 0,60993  | -0,00129 | 0,002 | 0,003 | 1 |
| Zfp217    | 0,60993  | -0,00129 | 0,002 | 0,003 | 1 |
| Sox3      | 0,60993  | -0,00129 | 0,002 | 0,003 | 1 |
| 54304270  | 0,60993  | -0,00129 | 0,002 | 0,003 | 1 |
| Gm15247   | 0,60993  | -0,00129 | 0,002 | 0,003 | 1 |
| Gm26530   | 0,60993  | -0,00129 | 0,002 | 0,003 | 1 |
| Gm42457   | 0,60993  | -0,00129 | 0,002 | 0,003 | 1 |
| Gm26857   | 0,60993  | -0,00129 | 0,002 | 0,003 | 1 |
| Rad54b    | 0,60993  | -0,00129 | 0,002 | 0,003 | 1 |
| Ptafr     | 0,60993  | -0,00129 | 0,002 | 0,003 | 1 |
| Tlr1      | 0,60993  | -0,00129 | 0,002 | 0,003 | 1 |
| Shisa3    | 0,60993  | -0,00129 | 0,002 | 0,003 | 1 |
| Gm16001   | 0,60993  | -0,00129 | 0,002 | 0,003 | 1 |
| Elfn1     | 0,60993  | -0,00129 | 0,002 | 0,003 | 1 |
| Card11    | 0,60993  | -0,00129 | 0,002 | 0,003 | 1 |
| Tex26     | 0,60993  | -0,00129 | 0,002 | 0,003 | 1 |
| Alox5     | 0,60993  | -0,00129 | 0,002 | 0,003 | 1 |
| Gm12781   | 0,60993  | -0,00129 | 0,002 | 0,003 | 1 |
| Tdrd12    | 0,60993  | -0,00129 | 0,002 | 0,003 | 1 |
| Homer2    | 0,60993  | -0,00129 | 0,002 | 0,003 | 1 |
| Trim6     | 0,60993  | -0,00129 | 0,002 | 0,003 | 1 |
| Olfr472   | 0,60993  | -0,00129 | 0,002 | 0,003 | 1 |
| Sh3rf3    | 0,60993  | -0,00129 | 0,002 | 0,003 | 1 |
| Gm48021   | 0,60993  | -0,00129 | 0,002 | 0,003 | 1 |
| 4921516A  | 0,60993  | -0,00129 | 0,002 | 0,003 | 1 |
| Smim18    | 0,60993  | -0,00129 | 0,002 | 0,003 | 1 |
| Gm45848   | 0,60993  | -0,00129 | 0,002 | 0,003 | 1 |
| Gm26586   | 0,60993  | -0,00129 | 0,002 | 0,003 | 1 |



|           |          |          |       |       |   |
|-----------|----------|----------|-------|-------|---|
| G430095P  | 0,60993  | -0,00129 | 0,002 | 0,003 | 1 |
| 4932416K  | 0,60993  | -0,00129 | 0,002 | 0,003 | 1 |
| Exoc3l    | 0,60993  | -0,00129 | 0,002 | 0,003 | 1 |
| Il34      | 0,60993  | -0,00129 | 0,002 | 0,003 | 1 |
| Gm48933   | 0,60993  | -0,00129 | 0,002 | 0,003 | 1 |
| Olfm2     | 0,60993  | -0,00129 | 0,002 | 0,003 | 1 |
| Olf981    | 0,60993  | -0,00129 | 0,002 | 0,003 | 1 |
| Bmp5      | 0,60993  | -0,00129 | 0,002 | 0,003 | 1 |
| Susd5     | 0,60993  | -0,00129 | 0,002 | 0,003 | 1 |
| Upp1      | 0,60993  | -0,00129 | 0,002 | 0,003 | 1 |
| Ntn1      | 0,60993  | -0,00129 | 0,002 | 0,003 | 1 |
| Gm11639   | 0,60993  | -0,00129 | 0,002 | 0,003 | 1 |
| Gm11772   | 0,60993  | -0,00129 | 0,002 | 0,003 | 1 |
| Gm26877   | 0,60993  | -0,00129 | 0,002 | 0,003 | 1 |
| Susd3     | 0,60993  | -0,00129 | 0,002 | 0,003 | 1 |
| Gprin1    | 0,60993  | -0,00129 | 0,002 | 0,003 | 1 |
| Cys1      | 0,60993  | -0,00129 | 0,002 | 0,003 | 1 |
| 4930544FC | 0,60993  | -0,00129 | 0,002 | 0,003 | 1 |
| Mpped1    | 0,60993  | -0,00129 | 0,002 | 0,003 | 1 |
| Ccdc184   | 0,60993  | -0,00129 | 0,002 | 0,003 | 1 |
| Rtl10     | 0,60993  | -0,00129 | 0,002 | 0,003 | 1 |
| B630019A  | 0,60993  | -0,00129 | 0,002 | 0,003 | 1 |
| Tmem44    | 0,60993  | -0,00129 | 0,002 | 0,003 | 1 |
| Gm15564   | 0,60993  | -0,00129 | 0,002 | 0,003 | 1 |
| Prss27    | 0,60993  | -0,00129 | 0,002 | 0,003 | 1 |
| Rhbdl1    | 0,60993  | -0,00129 | 0,002 | 0,003 | 1 |
| Cpne5     | 0,60993  | -0,00129 | 0,002 | 0,003 | 1 |
| Fhod3     | 0,60993  | -0,00129 | 0,002 | 0,003 | 1 |
| Frmd8os   | 0,60993  | -0,00129 | 0,002 | 0,003 | 1 |
| Pip5k1b   | 0,60993  | -0,00129 | 0,002 | 0,003 | 1 |
| Arhgap4   | 0,60993  | -0,00193 | 0,002 | 0,003 | 1 |
| Gm33370   | 0,60993  | -0,00193 | 0,002 | 0,003 | 1 |
| Slc16a13  | 0,60993  | -0,00193 | 0,002 | 0,003 | 1 |
| Nmbr      | 0,60993  | -0,00257 | 0,002 | 0,003 | 1 |
| Rhebl1    | 0,610024 | -0,00329 | 0,088 | 0,096 | 1 |
| Myh9      | 0,610123 | -0,00363 | 0,307 | 0,322 | 1 |
| Adck5     | 0,610141 | -0,00013 | 0,03  | 0,026 | 1 |
| Oscp1     | 0,610227 | -0,00386 | 0,062 | 0,068 | 1 |
| Adap1     | 0,610373 | 0,007406 | 0,956 | 0,958 | 1 |
| Vwa5b2    | 0,610373 | 2,86E-05 | 0,002 | 0,003 | 1 |
| St8sia3   | 0,610373 | -0,00095 | 0,002 | 0,003 | 1 |
| Wdr38     | 0,610386 | -0,00413 | 0,009 | 0,011 | 1 |
| Gm26624   | 0,610386 | -0,00413 | 0,009 | 0,011 | 1 |
| Gm39473   | 0,610386 | -0,00413 | 0,009 | 0,011 | 1 |
| Trap1     | 0,610719 | 0,021969 | 0,34  | 0,333 | 1 |
| Gpd1l     | 0,610775 | 0,023213 | 0,221 | 0,211 | 1 |
| Nrip3     | 0,610816 | 0,001648 | 0,002 | 0,003 | 1 |
| Arhgap42  | 0,610816 | 0,001648 | 0,002 | 0,003 | 1 |
| Hes1      | 0,610816 | 0,001648 | 0,002 | 0,003 | 1 |
| Efna5     | 0,610816 | 0,000671 | 0,002 | 0,003 | 1 |
| Nyap2     | 0,610816 | -0,00031 | 0,002 | 0,003 | 1 |
| Gm20753   | 0,610816 | -0,00031 | 0,002 | 0,003 | 1 |

|           |          |          |       |       |   |
|-----------|----------|----------|-------|-------|---|
| B4galt1   | 0,610816 | -0,00031 | 0,002 | 0,003 | 1 |
| Rab42     | 0,610816 | -0,00031 | 0,002 | 0,003 | 1 |
| Hes5      | 0,610816 | -0,00031 | 0,002 | 0,003 | 1 |
| Gm43118   | 0,610816 | -0,00031 | 0,002 | 0,003 | 1 |
| Nptx2     | 0,610816 | -0,00031 | 0,002 | 0,003 | 1 |
| Npy       | 0,610816 | -0,00031 | 0,002 | 0,003 | 1 |
| Olfr374   | 0,610816 | -0,00031 | 0,002 | 0,003 | 1 |
| Cpne6     | 0,610816 | -0,00031 | 0,002 | 0,003 | 1 |
| Cideb     | 0,610816 | -0,00031 | 0,002 | 0,003 | 1 |
| 6430571L1 | 0,610816 | -0,00031 | 0,002 | 0,003 | 1 |
| Fzd2      | 0,610816 | -0,00031 | 0,002 | 0,003 | 1 |
| Shc3      | 0,610816 | -0,00031 | 0,002 | 0,003 | 1 |
| Rsph1     | 0,610816 | -0,00095 | 0,002 | 0,003 | 1 |
| Selenof   | 0,61082  | 0,013066 | 0,971 | 0,984 | 1 |
| Fam92a    | 0,610987 | -0,0026  | 0,343 | 0,361 | 1 |
| Tmem196   | 0,611034 | -0,00075 | 0,026 | 0,031 | 1 |
| Nxf1      | 0,611046 | -0,00236 | 0,737 | 0,769 | 1 |
| Trp53rka  | 0,61123  | 0,030807 | 0,271 | 0,265 | 1 |
| Tbrg1     | 0,611281 | -0,01452 | 0,471 | 0,481 | 1 |
| Xpnp1     | 0,611284 | 0,024909 | 0,23  | 0,223 | 1 |
| Eml4      | 0,611476 | -0,01505 | 0,121 | 0,128 | 1 |
| Hsf1      | 0,61158  | -0,00044 | 0,263 | 0,278 | 1 |
| Hpgds     | 0,611612 | 5,69E-05 | 0,009 | 0,007 | 1 |
| Rorc      | 0,611703 | 0,000671 | 0,002 | 0,003 | 1 |
| Gm47604   | 0,611703 | 0,000671 | 0,002 | 0,003 | 1 |
| Kalrn     | 0,611703 | 0,008461 | 0,002 | 0,003 | 1 |
| Tmem158   | 0,611703 | 0,002624 | 0,002 | 0,003 | 1 |
| Mphosph8  | 0,61179  | 0,007259 | 0,59  | 0,613 | 1 |
| Ugdh      | 0,611818 | 0,037429 | 0,219 | 0,208 | 1 |
| Dock10    | 0,611889 | -0,00885 | 0,979 | 0,967 | 1 |
| Mon1a     | 0,61202  | -0,00315 | 0,159 | 0,169 | 1 |
| Msrb3     | 0,612089 | 0,000819 | 0,026 | 0,031 | 1 |
| Sema6d    | 0,612165 | 0,002354 | 0,657 | 0,67  | 1 |
| Smarce1   | 0,612235 | -0,01077 | 0,511 | 0,525 | 1 |
| Kcnq4     | 0,612387 | -0,00252 | 0,009 | 0,011 | 1 |
| H6pd      | 0,612387 | -0,00252 | 0,009 | 0,011 | 1 |
| Sbk2      | 0,612387 | -0,00252 | 0,009 | 0,011 | 1 |
| Mmd       | 0,612387 | -0,00252 | 0,009 | 0,011 | 1 |
| Hoxb8     | 0,612387 | -0,00252 | 0,009 | 0,011 | 1 |
| Gm4211    | 0,612387 | -0,00252 | 0,009 | 0,011 | 1 |
| 1010001B: | 0,61254  | -0,0108  | 0,012 | 0,015 | 1 |
| Hint2     | 0,61258  | -0,01424 | 0,311 | 0,322 | 1 |
| Fam83a    | 0,612836 | -0,00345 | 0,009 | 0,011 | 1 |
| Ddx18     | 0,61293  | 0,036729 | 0,488 | 0,488 | 1 |
| Lyrn1     | 0,613072 | -0,01084 | 0,13  | 0,138 | 1 |
| Tmem127   | 0,613247 | 0,01273  | 0,429 | 0,415 | 1 |
| Pdlim2    | 0,613248 | -0,00541 | 0,969 | 0,979 | 1 |
| Mkln1     | 0,613249 | 0,030705 | 0,73  | 0,732 | 1 |
| Zfp958    | 0,613608 | -0,00507 | 0,088 | 0,096 | 1 |
| Mapk4     | 0,613726 | -0,00122 | 0,009 | 0,011 | 1 |
| Nif3l1    | 0,61381  | -0,00684 | 0,117 | 0,125 | 1 |
| Aars      | 0,613818 | -0,00764 | 0,551 | 0,559 | 1 |

|           |          |          |       |       |   |
|-----------|----------|----------|-------|-------|---|
| Uqcrc2    | 0,613824 | 0,014218 | 0,848 | 0,859 | 1 |
| Gm13375   | 0,61383  | -0,00591 | 0,07  | 0,076 | 1 |
| Ino80d    | 0,613858 | 0,011168 | 0,546 | 0,567 | 1 |
| Klf10     | 0,613906 | -0,00438 | 0,121 | 0,13  | 1 |
| 493243011 | 0,613948 | -0,00058 | 0,009 | 0,011 | 1 |
| Gm10644   | 0,613948 | -0,00155 | 0,009 | 0,011 | 1 |
| Gm26846   | 0,613948 | -0,00155 | 0,009 | 0,011 | 1 |
| Tjp2      | 0,613992 | -0,01487 | 0,811 | 0,813 | 1 |
| Timm29    | 0,61403  | -0,00707 | 0,29  | 0,299 | 1 |
| Kbtbd4    | 0,614402 | -0,01001 | 0,111 | 0,119 | 1 |
| Sema3d    | 0,614425 | -0,01231 | 0,059 | 0,065 | 1 |
| Nfya      | 0,614645 | 0,000736 | 0,208 | 0,223 | 1 |
| Nup93     | 0,614681 | -0,00493 | 0,099 | 0,107 | 1 |
| Unkl      | 0,614794 | -0,00877 | 0,116 | 0,124 | 1 |
| Tmem51os  | 0,614887 | 0,005871 | 0,007 | 0,005 | 1 |
| BC049987  | 0,614887 | 0,005871 | 0,007 | 0,005 | 1 |
| Ung       | 0,614887 | 0,007811 | 0,007 | 0,005 | 1 |
| Sar1a     | 0,615057 | 0,000862 | 0,605 | 0,628 | 1 |
| Rpa3      | 0,615081 | 8,05E-05 | 0,31  | 0,327 | 1 |
| Ccdc106   | 0,61551  | -0,00058 | 0,009 | 0,011 | 1 |
| Fgf9      | 0,61551  | 0,00039  | 0,009 | 0,011 | 1 |
| 4732491K  | 0,615646 | 0,00216  | 0,053 | 0,047 | 1 |
| Cftr      | 0,615731 | 0,003927 | 0,007 | 0,005 | 1 |
| Tagln     | 0,615731 | 0,003927 | 0,007 | 0,005 | 1 |
| Ccr5      | 0,615731 | 0,003927 | 0,007 | 0,005 | 1 |
| Gm12359   | 0,615731 | 0,003927 | 0,007 | 0,005 | 1 |
| Wfdc12    | 0,615731 | 0,006841 | 0,007 | 0,005 | 1 |
| Tbc1d1    | 0,615731 | 0,006841 | 0,007 | 0,005 | 1 |
| Ebf4      | 0,615731 | 0,0049   | 0,007 | 0,005 | 1 |
| Myl12a    | 0,615837 | -0,01651 | 0,571 | 0,579 | 1 |
| Traf3ip1  | 0,615895 | 0,013501 | 0,132 | 0,124 | 1 |
| E2f3      | 0,616024 | -0,00871 | 0,064 | 0,07  | 1 |
| Tpm1      | 0,616106 | 0,032605 | 0,637 | 0,639 | 1 |
| Trp53inp1 | 0,616463 | 0,012908 | 0,208 | 0,22  | 1 |
| Cep170    | 0,61647  | -0,01617 | 0,726 | 0,735 | 1 |
| Tec       | 0,616576 | 0,0049   | 0,007 | 0,005 | 1 |
| A330074K  | 0,616576 | 0,003927 | 0,007 | 0,005 | 1 |
| Cdc25b    | 0,616576 | 0,002954 | 0,007 | 0,005 | 1 |
| Vsig10l   | 0,616576 | 0,002954 | 0,007 | 0,005 | 1 |
| Kcnj12    | 0,616576 | 0,002954 | 0,007 | 0,005 | 1 |
| Sfrp4     | 0,616576 | 0,002954 | 0,007 | 0,005 | 1 |
| Kcnh5     | 0,616576 | 0,002954 | 0,007 | 0,005 | 1 |
| Ablim3    | 0,616576 | 0,002954 | 0,007 | 0,005 | 1 |
| Etl4      | 0,616676 | -0,00466 | 0,018 | 0,021 | 1 |
| Nol8      | 0,616695 | 0,004745 | 0,321 | 0,307 | 1 |
| Fam83e    | 0,616859 | 0,003283 | 0,007 | 0,005 | 1 |
| lsg20l2   | 0,616866 | -0,00611 | 0,146 | 0,156 | 1 |
| Tsen34    | 0,616933 | 0,010685 | 0,585 | 0,563 | 1 |
| Pram1     | 0,617024 | -0,00408 | 0,012 | 0,015 | 1 |
| Rela      | 0,617027 | 0,027024 | 0,449 | 0,446 | 1 |
| Reps1     | 0,617216 | 0,013144 | 0,281 | 0,268 | 1 |
| 2810049EC | 0,617217 | -0,00442 | 0,012 | 0,015 | 1 |

|           |          |          |       |       |   |
|-----------|----------|----------|-------|-------|---|
| Gm17111   | 0,617217 | -0,00442 | 0,012 | 0,015 | 1 |
| P4ha1     | 0,617283 | 0,028943 | 0,368 | 0,395 | 1 |
| Olfr212   | 0,617422 | 0,00198  | 0,007 | 0,005 | 1 |
| Ces2f     | 0,617422 | 0,00198  | 0,007 | 0,005 | 1 |
| C23003511 | 0,617422 | 0,00198  | 0,007 | 0,005 | 1 |
| Hist1h3f  | 0,617422 | 0,00198  | 0,007 | 0,005 | 1 |
| Gm26803   | 0,617422 | 0,00198  | 0,007 | 0,005 | 1 |
| Ppp1r3c   | 0,617422 | 0,00198  | 0,007 | 0,005 | 1 |
| St5       | 0,617628 | -0,01092 | 0,222 | 0,233 | 1 |
| Klk7      | 0,617706 | 0,00231  | 0,007 | 0,005 | 1 |
| Pex5      | 0,617819 | -0,00452 | 0,238 | 0,252 | 1 |
| Nupr1     | 0,617838 | 0,005294 | 0,088 | 0,081 | 1 |
| Dnajb4    | 0,618131 | -0,01259 | 0,426 | 0,437 | 1 |
| Polr3gl   | 0,618186 | 0,001572 | 0,19  | 0,179 | 1 |
| Grin3a    | 0,618191 | 0,005547 | 0,005 | 0,003 | 1 |
| Hgh1      | 0,618461 | -0,00399 | 0,048 | 0,054 | 1 |
| Kcnj2     | 0,618513 | -0,01211 | 0,174 | 0,182 | 1 |
| Afmid     | 0,618552 | 0,001337 | 0,007 | 0,005 | 1 |
| G630018N  | 0,618552 | 0,001337 | 0,007 | 0,005 | 1 |
| Colec11   | 0,618626 | 0,00014  | 0,021 | 0,024 | 1 |
| Cryaa     | 0,618639 | 0,002328 | 0,009 | 0,011 | 1 |
| Fbxl8     | 0,618723 | 0,010835 | 0,049 | 0,044 | 1 |
| Ssu72     | 0,618725 | -0,00159 | 0,635 | 0,676 | 1 |
| Gm32633   | 0,618742 | 0,012787 | 0,035 | 0,031 | 1 |
| Syn2      | 0,618784 | -0,00312 | 0,012 | 0,015 | 1 |
| Pdss2     | 0,618803 | -0,00551 | 0,13  | 0,138 | 1 |
| Hvcn1     | 0,618865 | 0,003599 | 0,005 | 0,003 | 1 |
| Gm45069   | 0,618865 | 0,005547 | 0,005 | 0,003 | 1 |
| Gm16982   | 0,618865 | 0,004573 | 0,005 | 0,003 | 1 |
| Plau      | 0,618865 | 0,004573 | 0,005 | 0,003 | 1 |
| Icam1     | 0,618865 | 0,004573 | 0,005 | 0,003 | 1 |
| Klhl23    | 0,618977 | -0,00345 | 0,012 | 0,015 | 1 |
| 6430573P  | 0,618977 | -0,00345 | 0,012 | 0,015 | 1 |
| Gm12840   | 0,619097 | -0,00274 | 0,018 | 0,021 | 1 |
| Ap1ar     | 0,619111 | 0,005146 | 0,272 | 0,288 | 1 |
| Parvb     | 0,619211 | 0,0104   | 0,158 | 0,148 | 1 |
| Xab2      | 0,619238 | 0,020434 | 0,427 | 0,418 | 1 |
| Gm45345   | 0,619336 | -0,00693 | 0,166 | 0,176 | 1 |
| Gm48935   | 0,619399 | 0,000363 | 0,007 | 0,005 | 1 |
| Fbxl7     | 0,619399 | 0,000363 | 0,007 | 0,005 | 1 |
| Fancd2    | 0,619399 | -0,00125 | 0,007 | 0,005 | 1 |
| Adam1a    | 0,619539 | 0,006519 | 0,005 | 0,003 | 1 |
| Cavin1    | 0,619539 | 0,004573 | 0,005 | 0,003 | 1 |
| Fat4      | 0,619539 | 0,003599 | 0,005 | 0,003 | 1 |
| Igsf21    | 0,619539 | 0,003599 | 0,005 | 0,003 | 1 |
| 3632451O  | 0,619539 | 0,003599 | 0,005 | 0,003 | 1 |
| Tstd1     | 0,619539 | 0,002624 | 0,005 | 0,003 | 1 |
| Gm17300   | 0,619539 | 0,002624 | 0,005 | 0,003 | 1 |
| Rsg1      | 0,619539 | 0,002624 | 0,005 | 0,003 | 1 |
| Gm42984   | 0,619539 | 0,002624 | 0,005 | 0,003 | 1 |
| Pzp       | 0,619539 | 0,002624 | 0,005 | 0,003 | 1 |
| Gm38947   | 0,619539 | 0,002624 | 0,005 | 0,003 | 1 |

|           |          |          |       |       |   |
|-----------|----------|----------|-------|-------|---|
| Tnfaip3   | 0,619539 | 0,002624 | 0,005 | 0,003 | 1 |
| Slfn5     | 0,619539 | 0,002624 | 0,005 | 0,003 | 1 |
| Gm16059   | 0,619539 | 0,002624 | 0,005 | 0,003 | 1 |
| Gm15829   | 0,619539 | 0,002624 | 0,005 | 0,003 | 1 |
| Mdga1     | 0,619539 | 0,002624 | 0,005 | 0,003 | 1 |
| Prickle4  | 0,619539 | 0,002624 | 0,005 | 0,003 | 1 |
| Sema6b    | 0,619539 | 0,002624 | 0,005 | 0,003 | 1 |
| Stx1a     | 0,619562 | -0,00282 | 0,012 | 0,015 | 1 |
| Ctf1      | 0,620029 | -0,00181 | 0,015 | 0,018 | 1 |
| Mief1     | 0,620067 | -0,0003  | 0,22  | 0,233 | 1 |
| Thap2     | 0,620136 | -0,00244 | 0,531 | 0,553 | 1 |
| C330011M  | 0,620205 | 0,004262 | 0,009 | 0,011 | 1 |
| Gm28551   | 0,620214 | 0,001648 | 0,005 | 0,003 | 1 |
| Gm26892   | 0,620214 | 0,001648 | 0,005 | 0,003 | 1 |
| Gssos2    | 0,620214 | 0,001648 | 0,005 | 0,003 | 1 |
| Kcnq2     | 0,620214 | 0,001648 | 0,005 | 0,003 | 1 |
| Rtl8c     | 0,620214 | 0,001648 | 0,005 | 0,003 | 1 |
| Kcnn3     | 0,620214 | 0,001648 | 0,005 | 0,003 | 1 |
| Gm128     | 0,620214 | 0,001648 | 0,005 | 0,003 | 1 |
| Al427809  | 0,620214 | 0,001648 | 0,005 | 0,003 | 1 |
| Fhad1     | 0,620214 | 0,001648 | 0,005 | 0,003 | 1 |
| Cd38      | 0,620214 | 0,001648 | 0,005 | 0,003 | 1 |
| Gm15627   | 0,620214 | 0,001648 | 0,005 | 0,003 | 1 |
| Cldn15    | 0,620214 | 0,001648 | 0,005 | 0,003 | 1 |
| Gm10874   | 0,620214 | 0,001648 | 0,005 | 0,003 | 1 |
| Gm26790   | 0,620214 | 0,001648 | 0,005 | 0,003 | 1 |
| Gm45437   | 0,620214 | 0,001648 | 0,005 | 0,003 | 1 |
| Gm45441   | 0,620214 | 0,001648 | 0,005 | 0,003 | 1 |
| Syng4     | 0,620214 | 0,001648 | 0,005 | 0,003 | 1 |
| Gm32687   | 0,620214 | 0,001648 | 0,005 | 0,003 | 1 |
| Nwd1      | 0,620214 | 0,001648 | 0,005 | 0,003 | 1 |
| Odf311    | 0,620214 | 0,001648 | 0,005 | 0,003 | 1 |
| Gm12212   | 0,620214 | 0,001648 | 0,005 | 0,003 | 1 |
| Gm4262    | 0,620214 | 0,001648 | 0,005 | 0,003 | 1 |
| Gm5678    | 0,620214 | 0,001648 | 0,005 | 0,003 | 1 |
| 3300005Dl | 0,620214 | 0,001648 | 0,005 | 0,003 | 1 |
| Kcnip2    | 0,620214 | 0,001648 | 0,005 | 0,003 | 1 |
| Mpc2      | 0,62028  | 0,012613 | 0,889 | 0,876 | 1 |
| Tigar     | 0,620287 | -0,00246 | 0,051 | 0,057 | 1 |
| Illdr1    | 0,620383 | -0,00244 | 0,018 | 0,021 | 1 |
| Tmem35b   | 0,620464 | 0,002411 | 0,037 | 0,033 | 1 |
| Casp12    | 0,620552 | 0,00231  | 0,005 | 0,003 | 1 |
| Gm10118   | 0,620555 | -0,00312 | 0,015 | 0,018 | 1 |
| Ero1lb    | 0,620778 | 0,005871 | 0,072 | 0,065 | 1 |
| Wdr83     | 0,620808 | -0,00846 | 0,258 | 0,268 | 1 |
| Stk4      | 0,620813 | -0,00159 | 0,319 | 0,335 | 1 |
| Ckap4     | 0,62089  | 0,00198  | 0,005 | 0,003 | 1 |
| Vasp      | 0,620917 | -0,00753 | 0,13  | 0,138 | 1 |
| Samd12    | 0,620951 | -0,0004  | 0,037 | 0,033 | 1 |
| Col9a3    | 0,620961 | 0,018692 | 0,419 | 0,405 | 1 |
| Chpf      | 0,620997 | -0,0044  | 0,088 | 0,096 | 1 |
| Ash1l     | 0,621161 | 0,023194 | 0,817 | 0,811 | 1 |

|           |          |          |       |       |   |
|-----------|----------|----------|-------|-------|---|
| Suv39h1   | 0,621162 | -0,00111 | 0,167 | 0,177 | 1 |
| Slc46a3   | 0,621197 | -0,0037  | 0,018 | 0,021 | 1 |
| Pusl1     | 0,62121  | -0,01148 | 0,214 | 0,224 | 1 |
| Dtl       | 0,621227 | 0,001005 | 0,005 | 0,003 | 1 |
| 9530046B: | 0,621227 | 0,001005 | 0,005 | 0,003 | 1 |
| Slc6a15   | 0,621227 | 0,001005 | 0,005 | 0,003 | 1 |
| Cacng4    | 0,621227 | 0,001005 | 0,005 | 0,003 | 1 |
| Rrp1b     | 0,621304 | -0,01307 | 0,162 | 0,171 | 1 |
| Fam110a   | 0,621325 | -0,00185 | 0,012 | 0,015 | 1 |
| Scand1    | 0,621353 | -0,01453 | 0,827 | 0,831 | 1 |
| Pccb      | 0,621529 | -0,01213 | 0,377 | 0,387 | 1 |
| Fancm     | 0,621551 | 0,014345 | 0,128 | 0,12  | 1 |
| Rab43     | 0,621559 | 0,006814 | 0,035 | 0,031 | 1 |
| Kif22     | 0,621561 | 0,003368 | 0,037 | 0,033 | 1 |
| Fhl4      | 0,621565 | -0,00061 | 0,005 | 0,003 | 1 |
| Arhgef7   | 0,621764 | -0,01063 | 0,211 | 0,223 | 1 |
| 8030455M  | 0,621903 | 2,86E-05 | 0,005 | 0,003 | 1 |
| Gm19531   | 0,621903 | 2,86E-05 | 0,005 | 0,003 | 1 |
| BC049762  | 0,621903 | 2,86E-05 | 0,005 | 0,003 | 1 |
| Gm17058   | 0,621903 | 2,86E-05 | 0,005 | 0,003 | 1 |
| Stx19     | 0,621903 | 2,86E-05 | 0,005 | 0,003 | 1 |
| Cchcr1    | 0,621903 | 2,86E-05 | 0,005 | 0,003 | 1 |
| Rab9b     | 0,621948 | 0,004592 | 0,02  | 0,016 | 1 |
| Npat      | 0,622132 | 0,006034 | 0,575 | 0,559 | 1 |
| Dram2     | 0,622292 | -0,02255 | 0,447 | 0,462 | 1 |
| Sco2      | 0,622431 | -0,00748 | 0,132 | 0,141 | 1 |
| Pot1b     | 0,622431 | -0,00596 | 0,132 | 0,141 | 1 |
| Gm13920   | 0,622445 | 0,004277 | 0,02  | 0,016 | 1 |
| mt-Nd5    | 0,622493 | -0,02231 | 0,996 | 0,993 | 1 |
| Det1      | 0,622624 | 0,000666 | 0,054 | 0,06  | 1 |
| Ppp4r1    | 0,622781 | 0,024739 | 0,206 | 0,198 | 1 |
| Dicer1    | 0,622876 | 0,029914 | 0,632 | 0,634 | 1 |
| A930029G: | 0,62309  | -0,00088 | 0,012 | 0,015 | 1 |
| Irak1bp1  | 0,623231 | 0,019453 | 0,135 | 0,128 | 1 |
| Cep192    | 0,623374 | 0,000421 | 0,155 | 0,166 | 1 |
| Serac1    | 0,623503 | 0,004949 | 0,058 | 0,052 | 1 |
| 5330413P: | 0,623591 | 0,003632 | 0,02  | 0,016 | 1 |
| Dock6     | 0,623591 | 0,003632 | 0,02  | 0,016 | 1 |
| Rnf167    | 0,62373  | 0,007396 | 0,579 | 0,558 | 1 |
| Slain1os  | 0,62392  | 0,002036 | 0,02  | 0,016 | 1 |
| Phf21b    | 0,624089 | 0,001075 | 0,015 | 0,018 | 1 |
| Mcmcdc2   | 0,62427  | -0,00055 | 0,012 | 0,015 | 1 |
| Cradd     | 0,62432  | -0,00314 | 0,195 | 0,207 | 1 |
| Zfp212    | 0,624375 | -0,00146 | 0,138 | 0,148 | 1 |
| Ruvbl2    | 0,62438  | 0,024819 | 0,296 | 0,289 | 1 |
| Ccdc189   | 0,624595 | -0,00052 | 0,018 | 0,021 | 1 |
| Fam81a    | 0,624678 | 0,003332 | 0,028 | 0,024 | 1 |
| Sf3b1     | 0,625114 | 0,007433 | 0,924 | 0,95  | 1 |
| Ncoa6     | 0,625264 | 0,006085 | 0,368 | 0,387 | 1 |
| Sin3b     | 0,625623 | -0,01425 | 0,599 | 0,597 | 1 |
| Ddb1      | 0,62581  | 0,03477  | 0,716 | 0,75  | 1 |
| Tmem183a  | 0,625866 | -0,00588 | 0,311 | 0,322 | 1 |

|           |          |          |       |       |   |
|-----------|----------|----------|-------|-------|---|
| Sfxn2     | 0,625882 | 0,01293  | 0,147 | 0,159 | 1 |
| Pdhx      | 0,62592  | -0,00776 | 0,237 | 0,247 | 1 |
| Exo5      | 0,626026 | 0,012302 | 0,061 | 0,055 | 1 |
| Ilk       | 0,626038 | 0,014089 | 0,664 | 0,659 | 1 |
| Uba5      | 0,626147 | 0,015143 | 0,512 | 0,498 | 1 |
| Fam50a    | 0,626366 | -0,00647 | 0,391 | 0,407 | 1 |
| Gm16552   | 0,626626 | 0,003946 | 0,012 | 0,015 | 1 |
| 2610301B  | 0,626955 | 0,020225 | 0,193 | 0,185 | 1 |
| Fancc     | 0,626997 | -0,01404 | 0,207 | 0,216 | 1 |
| Nat2      | 0,627032 | -0,00413 | 0,034 | 0,039 | 1 |
| Syp1      | 0,627192 | 0,020676 | 0,352 | 0,345 | 1 |
| Rnf5      | 0,627193 | 0,0296   | 0,839 | 0,862 | 1 |
| 2610020C  | 0,627196 | 0,008056 | 0,042 | 0,037 | 1 |
| Pag1      | 0,627271 | 0,011532 | 0,225 | 0,215 | 1 |
| Pan3      | 0,627412 | 0,039855 | 0,405 | 0,408 | 1 |
| C130071C  | 0,627804 | 0,002854 | 0,287 | 0,299 | 1 |
| Gm10687   | 0,627882 | 0,00478  | 0,15  | 0,161 | 1 |
| Klhl42    | 0,627915 | -0,0072  | 0,145 | 0,154 | 1 |
| Rpl27a    | 0,62793  | 0,00608  | 0,997 | 0,998 | 1 |
| Nedd1     | 0,627946 | 0,003946 | 0,155 | 0,166 | 1 |
| Zfp128    | 0,628038 | 0,006489 | 0,056 | 0,05  | 1 |
| Pcdhga6   | 0,628287 | -0,00089 | 0,051 | 0,057 | 1 |
| Gm12207   | 0,628335 | 0,002671 | 0,015 | 0,018 | 1 |
| Haus7     | 0,628381 | -0,00587 | 0,185 | 0,195 | 1 |
| Map1b     | 0,628444 | -0,0642  | 0,841 | 0,844 | 1 |
| Gm35439   | 0,628538 | 0,001075 | 0,02  | 0,016 | 1 |
| Zfp292    | 0,628564 | -0,00528 | 0,52  | 0,538 | 1 |
| Lipa      | 0,6286   | -0,01622 | 0,542 | 0,553 | 1 |
| Ska2      | 0,628998 | 0,008629 | 0,152 | 0,143 | 1 |
| Rac3      | 0,629046 | -0,00163 | 0,034 | 0,039 | 1 |
| Mrps31    | 0,629151 | 0,008654 | 0,324 | 0,315 | 1 |
| Pde11a    | 0,629558 | -0,007   | 0,053 | 0,059 | 1 |
| Cdk19     | 0,629575 | -0,00785 | 0,883 | 0,906 | 1 |
| 1300017JC | 0,629931 | 0,004918 | 0,021 | 0,024 | 1 |
| Nnat      | 0,629962 | 0,011161 | 0,047 | 0,042 | 1 |
| Commd5    | 0,629967 | -0,00427 | 0,056 | 0,062 | 1 |
| Abca3     | 0,630009 | 0,006603 | 0,26  | 0,276 | 1 |
| Immp2l    | 0,630087 | 0,004091 | 0,095 | 0,088 | 1 |
| Foxo3     | 0,630475 | 0,00198  | 0,267 | 0,254 | 1 |
| Rad21     | 0,630495 | 0,006551 | 0,81  | 0,777 | 1 |
| Zfp850    | 0,630544 | 0,009362 | 0,026 | 0,023 | 1 |
| Gyg       | 0,630567 | -0,00738 | 0,431 | 0,452 | 1 |
| Ndufb6    | 0,630653 | -0,01184 | 0,63  | 0,646 | 1 |
| Pqbp1     | 0,631066 | -0,00462 | 0,494 | 0,514 | 1 |
| Wdr55     | 0,631109 | 0,010986 | 0,138 | 0,13  | 1 |
| Cop1      | 0,631118 | 0,018489 | 0,541 | 0,53  | 1 |
| Chrac1    | 0,631215 | 0,002885 | 0,311 | 0,298 | 1 |
| Rab3d     | 0,631405 | 0,01282  | 0,026 | 0,023 | 1 |
| Hoxa2     | 0,631432 | -0,0029  | 0,067 | 0,073 | 1 |
| Cyhr1     | 0,63151  | -0,00495 | 0,876 | 0,893 | 1 |
| Rnf168    | 0,631647 | 0,004391 | 0,365 | 0,384 | 1 |
| Atp5j2    | 0,631708 | 0,01823  | 0,974 | 0,963 | 1 |

|          |          |          |       |       |   |
|----------|----------|----------|-------|-------|---|
| Trim13   | 0,631814 | 0,019479 | 0,516 | 0,509 | 1 |
| Med9     | 0,631903 | 0,002566 | 0,242 | 0,229 | 1 |
| AU022252 | 0,632081 | 0,003804 | 0,208 | 0,221 | 1 |
| Wdyhv1   | 0,632186 | -0,01036 | 0,123 | 0,13  | 1 |
| Morn4    | 0,632209 | 0,016386 | 0,154 | 0,146 | 1 |
| Qsox2    | 0,632259 | -0,00182 | 0,25  | 0,262 | 1 |
| Cep152   | 0,632321 | 0,000936 | 0,051 | 0,057 | 1 |
| Rfc4     | 0,632328 | 0,012191 | 0,125 | 0,117 | 1 |
| Lrrn4cl  | 0,632399 | 0,00971  | 0,018 | 0,015 | 1 |
| Rprd1b   | 0,63254  | 0,005381 | 0,259 | 0,273 | 1 |
| Fam216a  | 0,632634 | -0,00672 | 0,184 | 0,195 | 1 |
| Nae1     | 0,632654 | 0,000787 | 0,42  | 0,431 | 1 |
| Dtx4     | 0,632721 | -0,01215 | 0,089 | 0,096 | 1 |
| Prdx2    | 0,632761 | 0,007464 | 0,851 | 0,872 | 1 |
| Tmc3     | 0,632769 | 0,004743 | 0,109 | 0,117 | 1 |
| Wnt5b    | 0,633447 | -0,00196 | 0,031 | 0,036 | 1 |
| Afg3l2   | 0,633454 | -0,00307 | 0,198 | 0,21  | 1 |
| Ppfibp2  | 0,633698 | 0,031131 | 0,856 | 0,836 | 1 |
| Pard3b   | 0,633969 | 0,008751 | 0,018 | 0,015 | 1 |
| Aph1c    | 0,634189 | -0,00418 | 0,031 | 0,036 | 1 |
| Psd2     | 0,634268 | -0,00919 | 0,194 | 0,205 | 1 |
| Cetn3    | 0,634489 | 0,004287 | 0,763 | 0,785 | 1 |
| Pih1d1   | 0,634703 | 0,00657  | 0,304 | 0,324 | 1 |
| Snrnp25  | 0,634715 | -0,00881 | 0,187 | 0,197 | 1 |
| Wdhd1    | 0,634819 | 0,016005 | 0,047 | 0,042 | 1 |
| Amer2    | 0,634912 | -0,00503 | 0,6   | 0,608 | 1 |
| Sipa1l2  | 0,634966 | -0,01643 | 0,24  | 0,249 | 1 |
| Lmtk2    | 0,634999 | 0,010117 | 0,136 | 0,128 | 1 |
| Mus81    | 0,635036 | 0,00256  | 0,152 | 0,163 | 1 |
| Atp6v0b  | 0,635122 | 0,018013 | 0,991 | 0,997 | 1 |
| 2510009E | 0,635477 | 0,011128 | 0,588 | 0,564 | 1 |
| Zbtb7b   | 0,635567 | -0,00803 | 0,319 | 0,332 | 1 |
| 6430548M | 0,635763 | -0,01451 | 0,208 | 0,216 | 1 |
| Mrgpre   | 0,635884 | -0,00209 | 0,09  | 0,098 | 1 |
| Tns2     | 0,635921 | 0,011913 | 0,123 | 0,115 | 1 |
| Eif3a    | 0,635984 | 0,014386 | 0,929 | 0,932 | 1 |
| Tada1    | 0,636171 | -0,01272 | 0,544 | 0,551 | 1 |
| Atrn     | 0,636221 | 0,00327  | 0,788 | 0,811 | 1 |
| 2810004N | 0,636472 | 0,015152 | 0,451 | 0,444 | 1 |
| Asah1    | 0,636832 | 0,00974  | 0,555 | 0,535 | 1 |
| Lrch1    | 0,63684  | 0,002356 | 0,096 | 0,104 | 1 |
| Plekha1  | 0,636859 | -0,01818 | 0,82  | 0,833 | 1 |
| Rbm17    | 0,636963 | -0,00352 | 0,452 | 0,478 | 1 |
| Cdr2     | 0,637109 | -0,00482 | 0,179 | 0,187 | 1 |
| Decr2    | 0,637246 | 0,019819 | 0,064 | 0,059 | 1 |
| Ric8a    | 0,637257 | 0,01802  | 0,42  | 0,416 | 1 |
| Myzap    | 0,637268 | 0,011112 | 0,047 | 0,042 | 1 |
| Cul3     | 0,638043 | -0,00286 | 0,71  | 0,714 | 1 |
| Ccdc191  | 0,638218 | -0,01797 | 0,249 | 0,257 | 1 |
| Pard3    | 0,638282 | -0,0102  | 0,626 | 0,629 | 1 |
| Cux2     | 0,638285 | -0,00506 | 0,172 | 0,18  | 1 |
| Gm14966  | 0,638298 | 0,01023  | 0,047 | 0,042 | 1 |



|          |          |          |       |       |   |
|----------|----------|----------|-------|-------|---|
| Cetn2    | 0,638381 | 0,009244 | 0,347 | 0,335 | 1 |
| Idh2     | 0,638619 | -0,01606 | 0,273 | 0,281 | 1 |
| Mfsd11   | 0,638782 | 0,012849 | 0,372 | 0,361 | 1 |
| Amfr     | 0,63887  | 0,011511 | 0,749 | 0,746 | 1 |
| Crebl2   | 0,638948 | -0,01272 | 0,328 | 0,34  | 1 |
| Rpgrip1l | 0,639204 | -0,0127  | 0,169 | 0,177 | 1 |
| Ttc3     | 0,639258 | 0,022097 | 0,803 | 0,777 | 1 |
| Stxbp2   | 0,639638 | -0,04633 | 0,25  | 0,262 | 1 |
| Kif1c    | 0,639885 | -0,00988 | 0,184 | 0,195 | 1 |
| 2310016G | 0,639945 | 0,006188 | 0,026 | 0,023 | 1 |
| Traf2    | 0,640007 | 0,015362 | 0,186 | 0,179 | 1 |
| Fndc3b   | 0,640034 | 0,000331 | 0,131 | 0,14  | 1 |
| Tm2d1    | 0,640121 | -0,00279 | 0,494 | 0,512 | 1 |
| Chsy1    | 0,640261 | 0,004909 | 0,018 | 0,015 | 1 |
| Wasf2    | 0,640287 | -0,00737 | 0,688 | 0,706 | 1 |
| Trappc3  | 0,640315 | -0,00573 | 0,61  | 0,623 | 1 |
| Tango6   | 0,640396 | 0,004949 | 0,056 | 0,05  | 1 |
| Creb1    | 0,640423 | 0,00917  | 0,508 | 0,491 | 1 |
| Tmc4     | 0,640444 | 0,004913 | 0,018 | 0,015 | 1 |
| Sgo2a    | 0,640774 | -0,00946 | 0,028 | 0,024 | 1 |
| Tpm3-rs7 | 0,640883 | 0,006818 | 0,033 | 0,029 | 1 |
| Rhot2    | 0,640931 | 0,018583 | 0,22  | 0,213 | 1 |
| Slc35c2  | 0,640967 | 0,012533 | 0,194 | 0,185 | 1 |
| Bud23    | 0,641108 | 0,000162 | 0,267 | 0,281 | 1 |
| Zc3h7b   | 0,641503 | -0,00527 | 0,405 | 0,426 | 1 |
| Birc6    | 0,641582 | -0,01383 | 0,773 | 0,787 | 1 |
| Gm36839  | 0,6416   | 0,020443 | 0,062 | 0,057 | 1 |
| Filip1l  | 0,641721 | 0,008671 | 0,04  | 0,036 | 1 |
| Slc41a3  | 0,641735 | -0,00282 | 0,042 | 0,047 | 1 |
| Card10   | 0,641752 | 0,010971 | 0,073 | 0,067 | 1 |
| Mterf3   | 0,641822 | -0,00302 | 0,299 | 0,311 | 1 |
| D830025C | 0,641924 | 0,013731 | 0,066 | 0,06  | 1 |
| Zfp747   | 0,642009 | 0,013695 | 0,076 | 0,07  | 1 |
| Gm16286  | 0,642528 | 0,022074 | 0,684 | 0,691 | 1 |
| Gm12802  | 0,642677 | -0,00361 | 0,028 | 0,033 | 1 |
| Zfp334   | 0,642828 | -0,0004  | 0,122 | 0,13  | 1 |
| Sh2d6    | 0,642954 | -0,00679 | 0,042 | 0,047 | 1 |
| Tmem246  | 0,642956 | 0,030188 | 0,38  | 0,376 | 1 |
| Man1b1   | 0,643039 | 0,007383 | 0,377 | 0,397 | 1 |
| Dnajc21  | 0,643093 | 0,006703 | 0,38  | 0,398 | 1 |
| Cops4    | 0,643211 | 0,017383 | 0,571 | 0,561 | 1 |
| Cand1    | 0,643269 | 0,011262 | 0,343 | 0,364 | 1 |
| Apoo     | 0,643297 | 0,005067 | 0,192 | 0,182 | 1 |
| Tmem87b  | 0,643406 | -0,01129 | 0,497 | 0,511 | 1 |
| Neil1    | 0,643465 | 0,009343 | 0,118 | 0,111 | 1 |
| Isca1    | 0,643591 | -0,0106  | 0,236 | 0,244 | 1 |
| Gm26722  | 0,643953 | 0,012243 | 0,071 | 0,065 | 1 |
| Metap2   | 0,644282 | 0,026512 | 0,932 | 0,922 | 1 |
| Xndc1    | 0,644347 | -0,00185 | 0,182 | 0,192 | 1 |
| Taldo1   | 0,644403 | -0,00273 | 0,999 | 0,998 | 1 |
| Arl6ip6  | 0,644715 | 0,014709 | 0,213 | 0,205 | 1 |
| Ubxn2b   | 0,644958 | 0,002394 | 0,178 | 0,189 | 1 |

|           |          |          |       |       |   |
|-----------|----------|----------|-------|-------|---|
| 6720483E2 | 0,645002 | -0,00022 | 0,018 | 0,015 | 1 |
| Atp6v1f   | 0,645147 | 0,016962 | 0,937 | 0,946 | 1 |
| Cnot6     | 0,645329 | -0,00057 | 0,406 | 0,423 | 1 |
| Tpcn2     | 0,645438 | -0,0017  | 0,028 | 0,033 | 1 |
| Lrrc75b   | 0,645516 | 0,016937 | 0,109 | 0,102 | 1 |
| Cox7a2    | 0,645533 | -0,01114 | 0,982 | 0,972 | 1 |
| 231006110 | 0,645572 | 0,020092 | 0,236 | 0,228 | 1 |
| B230369F2 | 0,645655 | -0,00732 | 0,081 | 0,088 | 1 |
| Sppl2a    | 0,645922 | -0,01422 | 0,477 | 0,483 | 1 |
| Ctdnep1   | 0,645944 | -0,00319 | 0,396 | 0,418 | 1 |
| Ccnj      | 0,645967 | -0,00575 | 0,058 | 0,063 | 1 |
| Ywhag     | 0,646243 | 0,03135  | 0,706 | 0,715 | 1 |
| Ddx21     | 0,646565 | 0,002888 | 0,359 | 0,341 | 1 |
| N4bp2     | 0,646572 | -0,0047  | 0,102 | 0,109 | 1 |
| Zfr       | 0,646701 | -0,00892 | 0,838 | 0,839 | 1 |
| Greb1l    | 0,646764 | -0,00403 | 0,018 | 0,015 | 1 |
| Abhd14b   | 0,64682  | -0,00365 | 0,221 | 0,231 | 1 |
| Nop58     | 0,647234 | 0,01272  | 0,284 | 0,299 | 1 |
| Syng1     | 0,647309 | -2,9E-05 | 0,132 | 0,141 | 1 |
| Stx3      | 0,647375 | -0,00402 | 0,157 | 0,148 | 1 |
| Sesn2     | 0,647382 | 0,004017 | 0,045 | 0,05  | 1 |
| Rnf141    | 0,647438 | -0,00055 | 0,883 | 0,899 | 1 |
| 1700066M  | 0,647463 | -0,00714 | 0,284 | 0,296 | 1 |
| A230072E1 | 0,647513 | -0,00872 | 0,023 | 0,026 | 1 |
| Sdcbp     | 0,64766  | -0,0176  | 0,46  | 0,459 | 1 |
| Mkrn2     | 0,647711 | 0,025413 | 0,364 | 0,359 | 1 |
| Slc35b3   | 0,647729 | -0,00701 | 0,181 | 0,19  | 1 |
| Spindoc   | 0,647852 | 0,01324  | 0,099 | 0,093 | 1 |
| Ccdc89    | 0,647855 | -0,00819 | 0,055 | 0,06  | 1 |
| Faim      | 0,648218 | -0,00462 | 0,608 | 0,624 | 1 |
| Zfp955a   | 0,648267 | -0,01086 | 0,044 | 0,049 | 1 |
| Gmds      | 0,648384 | -0,0014  | 0,15  | 0,14  | 1 |
| Cald1     | 0,648584 | 0,021612 | 0,538 | 0,569 | 1 |
| Ptges3    | 0,648703 | -0,01128 | 0,985 | 0,974 | 1 |
| Pros1     | 0,648728 | -0,00934 | 0,183 | 0,19  | 1 |
| Cd81      | 0,648755 | 0,026851 | 0,999 | 1     | 1 |
| Galnt1    | 0,648764 | -0,00035 | 0,513 | 0,532 | 1 |
| Hlcs      | 0,648932 | 0,011994 | 0,19  | 0,182 | 1 |
| Cbx6      | 0,649048 | 0,027345 | 0,634 | 0,636 | 1 |
| Pogk      | 0,64909  | -0,00981 | 0,674 | 0,696 | 1 |
| Gins4     | 0,649094 | -0,01583 | 0,548 | 0,564 | 1 |
| Nrap      | 0,649105 | -0,00641 | 0,136 | 0,145 | 1 |
| Kremen1   | 0,649166 | 0,013616 | 0,184 | 0,176 | 1 |
| Mtrf1     | 0,649653 | 0,001154 | 0,093 | 0,101 | 1 |
| Dnajc19   | 0,649938 | 0,00452  | 0,758 | 0,797 | 1 |
| Foxred2   | 0,649948 | -0,00651 | 0,047 | 0,052 | 1 |
| Thoc3     | 0,649964 | -0,01319 | 0,363 | 0,374 | 1 |
| Pfdn5     | 0,650045 | 0,0089   | 0,975 | 0,972 | 1 |
| Zfp422    | 0,650074 | -0,00961 | 0,17  | 0,177 | 1 |
| Snx4      | 0,650321 | -0,01154 | 0,329 | 0,338 | 1 |
| Lrpap1    | 0,650325 | 0,002241 | 0,679 | 0,714 | 1 |
| Ripk1     | 0,650436 | 0,039003 | 0,179 | 0,176 | 1 |

|          |          |          |       |       |   |
|----------|----------|----------|-------|-------|---|
| Slc6a1   | 0,650474 | 0,007667 | 0,633 | 0,628 | 1 |
| Gm10138  | 0,650624 | 0,003212 | 0,085 | 0,093 | 1 |
| Sox12    | 0,650701 | -0,00025 | 0,175 | 0,185 | 1 |
| Pigm     | 0,650911 | 0,017281 | 0,171 | 0,163 | 1 |
| Rragd    | 0,650926 | 0,01221  | 0,025 | 0,021 | 1 |
| Syne1    | 0,65107  | -0,00875 | 0,162 | 0,171 | 1 |
| Rab14    | 0,651158 | -0,01493 | 0,988 | 0,992 | 1 |
| Gm13889  | 0,651307 | -0,0168  | 0,088 | 0,094 | 1 |
| Tmed4    | 0,65139  | -0,00304 | 0,76  | 0,793 | 1 |
| 5730480H | 0,651498 | -0,00439 | 0,148 | 0,158 | 1 |
| Hira     | 0,651671 | -0,01859 | 0,233 | 0,241 | 1 |
| Zfp983   | 0,651694 | -0,01256 | 0,068 | 0,073 | 1 |
| Ccser2   | 0,651872 | -0,00996 | 0,516 | 0,532 | 1 |
| Arrdc1   | 0,651931 | 0,01023  | 0,045 | 0,041 | 1 |
| Gm48742  | 0,652139 | 0,009869 | 0,052 | 0,047 | 1 |
| Cnot7    | 0,652202 | 0,027481 | 0,397 | 0,392 | 1 |
| Ccdc115  | 0,652577 | -0,00717 | 0,241 | 0,252 | 1 |
| Lgals3bp | 0,652581 | -0,01064 | 0,02  | 0,023 | 1 |
| Edc3     | 0,652633 | 0,008421 | 0,134 | 0,127 | 1 |
| Sacs     | 0,652893 | 0,012018 | 0,169 | 0,161 | 1 |
| Kctd9    | 0,653585 | 0,0137   | 0,114 | 0,107 | 1 |
| Txn14b   | 0,653882 | -0,00301 | 0,124 | 0,132 | 1 |
| Arhgef1  | 0,654165 | 0,003921 | 0,356 | 0,374 | 1 |
| Usp49    | 0,65422  | 0,007086 | 0,066 | 0,06  | 1 |
| Cenps    | 0,654406 | 0,002716 | 0,028 | 0,033 | 1 |
| Tnfaip8  | 0,654631 | -0,00361 | 0,026 | 0,029 | 1 |
| Cep41    | 0,654817 | 0,009255 | 0,128 | 0,12  | 1 |
| Bag5     | 0,654912 | 0,027695 | 0,312 | 0,311 | 1 |
| Gm10655  | 0,655312 | 0,007475 | 0,016 | 0,013 | 1 |
| Mtr      | 0,655461 | 0,002859 | 0,066 | 0,06  | 1 |
| Tlnrd1   | 0,655539 | 0,003792 | 0,091 | 0,085 | 1 |
| Tada3    | 0,655796 | -0,00804 | 0,352 | 0,363 | 1 |
| Crocc    | 0,655868 | 0,001143 | 0,028 | 0,033 | 1 |
| Ccdc85c  | 0,655879 | -0,00505 | 0,066 | 0,072 | 1 |
| Anapc7   | 0,655974 | -0,0022  | 0,319 | 0,33  | 1 |
| Hipk1    | 0,656183 | -0,0118  | 0,454 | 0,47  | 1 |
| Pecam1   | 0,656269 | 0,00902  | 0,031 | 0,028 | 1 |
| Casc3    | 0,656424 | -0,00651 | 0,403 | 0,416 | 1 |
| Clcn5    | 0,656492 | 0,002843 | 0,278 | 0,291 | 1 |
| Tmsb4x   | 0,656922 | -0,01589 | 0,999 | 1     | 1 |
| Asphd1   | 0,657137 | 0,010614 | 0,087 | 0,081 | 1 |
| Mrps24   | 0,657197 | -0,0132  | 0,639 | 0,644 | 1 |
| Pgap3    | 0,657326 | -0,00618 | 0,044 | 0,049 | 1 |
| B3gat2   | 0,657689 | -0,00399 | 0,023 | 0,026 | 1 |
| Fam124a  | 0,657706 | -0,00859 | 0,023 | 0,026 | 1 |
| Zscan29  | 0,657716 | 0,012032 | 0,143 | 0,137 | 1 |
| Pinx1    | 0,657789 | 0,006147 | 0,143 | 0,153 | 1 |
| Frzb     | 0,657943 | 0,00715  | 0,016 | 0,013 | 1 |
| Elp4     | 0,657946 | 0,000858 | 0,295 | 0,312 | 1 |
| Palm2    | 0,658045 | -0,03119 | 0,288 | 0,291 | 1 |
| Clcn1    | 0,658313 | 0,004586 | 0,016 | 0,013 | 1 |
| Gm44053  | 0,658313 | 0,004586 | 0,016 | 0,013 | 1 |

|           |          |          |       |       |   |
|-----------|----------|----------|-------|-------|---|
| Zfp953    | 0,65852  | -0,0006  | 0,05  | 0,055 | 1 |
| Tcf25     | 0,6587   | 0,012445 | 0,963 | 0,971 | 1 |
| Ugcg      | 0,658757 | 0,018836 | 0,191 | 0,182 | 1 |
| Naa38     | 0,65904  | -0,01026 | 0,573 | 0,585 | 1 |
| Pdap1     | 0,659103 | 0,000157 | 0,885 | 0,907 | 1 |
| Slitrk3   | 0,659255 | 0,007792 | 0,016 | 0,013 | 1 |
| Tspoap1   | 0,659295 | 0,00332  | 0,025 | 0,021 | 1 |
| Fam180a   | 0,659606 | -0,00236 | 0,025 | 0,021 | 1 |
| Psmb4     | 0,659805 | 0,009352 | 0,953 | 0,937 | 1 |
| 9130011E1 | 0,659824 | 0,004322 | 0,042 | 0,047 | 1 |
| C330018D: | 0,660207 | 0,009823 | 0,144 | 0,137 | 1 |
| Dhx16     | 0,660415 | 0,027463 | 0,249 | 0,244 | 1 |
| Git1      | 0,660437 | -0,01517 | 0,838 | 0,852 | 1 |
| Orc5      | 0,660456 | 0,004544 | 0,184 | 0,195 | 1 |
| Cecr2     | 0,66047  | -0,0036  | 0,077 | 0,083 | 1 |
| Elac1     | 0,660588 | 0,015947 | 0,142 | 0,135 | 1 |
| Slc25a13  | 0,660761 | -0,01193 | 0,419 | 0,426 | 1 |
| Poc5      | 0,660955 | 0,02951  | 0,267 | 0,262 | 1 |
| Atxn7     | 0,661088 | 0,008352 | 0,242 | 0,231 | 1 |
| A830005Fz | 0,661101 | 0,002686 | 0,025 | 0,021 | 1 |
| Gm7467    | 0,661349 | -9E-05   | 0,079 | 0,086 | 1 |
| Rpl21     | 0,661364 | 0,005837 | 0,997 | 0,997 | 1 |
| C87436    | 0,661386 | 0,007288 | 0,286 | 0,304 | 1 |
| Arid3a    | 0,661478 | 0,015912 | 0,062 | 0,057 | 1 |
| Lars2     | 0,661669 | 0,052399 | 0,887 | 0,893 | 1 |
| Ufsp2     | 0,66173  | -0,02054 | 0,392 | 0,397 | 1 |
| Eif3i     | 0,661918 | -0,00077 | 0,703 | 0,728 | 1 |
| Upf3a     | 0,662116 | 0,006304 | 0,363 | 0,345 | 1 |
| Cnot6l    | 0,662153 | 0,005465 | 0,394 | 0,41  | 1 |
| 2900097C: | 0,662229 | 0,035266 | 0,823 | 0,826 | 1 |
| Atp6v0a1  | 0,662272 | 0,013074 | 0,613 | 0,587 | 1 |
| Flcn      | 0,662418 | -0,00918 | 0,295 | 0,306 | 1 |
| Lrrc57    | 0,662449 | -0,00764 | 0,23  | 0,239 | 1 |
| Rnaseh1   | 0,662573 | 0,004079 | 0,238 | 0,228 | 1 |
| Mex3b     | 0,662641 | 0,021672 | 0,198 | 0,19  | 1 |
| Hspb2     | 0,662772 | -0,00012 | 0,074 | 0,08  | 1 |
| Neil2     | 0,662829 | 0,002017 | 0,016 | 0,013 | 1 |
| Tnfrsf13  | 0,662829 | 0,002017 | 0,016 | 0,013 | 1 |
| Rhpn1     | 0,662829 | 0,002017 | 0,016 | 0,013 | 1 |
| Ripk4     | 0,662829 | 0,002017 | 0,016 | 0,013 | 1 |
| Chaf1a    | 0,662919 | -0,00163 | 0,036 | 0,041 | 1 |
| Topors    | 0,663225 | 0,01332  | 0,375 | 0,402 | 1 |
| Pdlim1    | 0,663255 | 0,00154  | 0,515 | 0,499 | 1 |
| Mknk1     | 0,663349 | -0,00714 | 0,107 | 0,114 | 1 |
| Dedd      | 0,663356 | 0,010808 | 0,339 | 0,358 | 1 |
| Mre11a    | 0,663408 | -0,00655 | 0,147 | 0,156 | 1 |
| Timm17b   | 0,663486 | -0,00761 | 0,403 | 0,415 | 1 |
| Ripk2     | 0,663807 | 0,007415 | 0,052 | 0,047 | 1 |
| Nt5e      | 0,663874 | -0,00617 | 0,089 | 0,096 | 1 |
| Zfp839    | 0,663909 | 0,011762 | 0,097 | 0,091 | 1 |
| Plxnb2    | 0,66408  | -0,00299 | 0,023 | 0,026 | 1 |
| Harbi1    | 0,664115 | -0,01667 | 0,093 | 0,099 | 1 |

|          |          |          |       |       |   |
|----------|----------|----------|-------|-------|---|
| Tesk1    | 0,664244 | 0,009286 | 0,21  | 0,202 | 1 |
| Ifi35    | 0,664282 | -0,03889 | 0,079 | 0,083 | 1 |
| Mypop    | 0,664297 | 0,020035 | 0,134 | 0,128 | 1 |
| Cenpk    | 0,664336 | -0,00215 | 0,016 | 0,013 | 1 |
| Immp1l   | 0,664621 | -0,01342 | 0,482 | 0,498 | 1 |
| Mapk1ip1 | 0,664661 | 0,008587 | 0,25  | 0,265 | 1 |
| Brf1     | 0,66467  | 0,020072 | 0,32  | 0,311 | 1 |
| Gpkow    | 0,664912 | 0,004058 | 0,214 | 0,203 | 1 |
| Fkbp5    | 0,665026 | 0,006501 | 0,028 | 0,033 | 1 |
| B230303O | 0,665286 | 0,00524  | 0,031 | 0,028 | 1 |
| Slc25a32 | 0,665316 | 0,001084 | 0,132 | 0,141 | 1 |
| Ube3c    | 0,665451 | -0,00668 | 0,364 | 0,371 | 1 |
| Pold3    | 0,66559  | 0,000814 | 0,242 | 0,231 | 1 |
| Rab35    | 0,665781 | -0,00744 | 0,292 | 0,302 | 1 |
| Mau2     | 0,66619  | -0,02657 | 0,636 | 0,616 | 1 |
| Elp5     | 0,666209 | 0,004013 | 0,313 | 0,327 | 1 |
| Ints2    | 0,666338 | 0,020619 | 0,132 | 0,127 | 1 |
| Mesd     | 0,666431 | -0,00322 | 0,379 | 0,39  | 1 |
| Capza1   | 0,666436 | 0,019465 | 0,42  | 0,411 | 1 |
| Tdrd3    | 0,666438 | 0,023731 | 0,241 | 0,234 | 1 |
| Pdcd7    | 0,666598 | 0,018511 | 0,31  | 0,299 | 1 |
| Il12rb1  | 0,666812 | -0,01989 | 0,091 | 0,085 | 1 |
| Lsm11    | 0,666841 | -0,00766 | 0,052 | 0,057 | 1 |
| Wfikkn2  | 0,666935 | 0,004616 | 0,038 | 0,034 | 1 |
| BC017643 | 0,666955 | 0,001466 | 0,279 | 0,267 | 1 |
| B230307C | 0,667109 | -0,00173 | 0,175 | 0,184 | 1 |
| Soga3    | 0,667113 | -0,00112 | 0,629 | 0,637 | 1 |
| Hp1bp3   | 0,66716  | -0,00551 | 0,865 | 0,872 | 1 |
| Ndufb7   | 0,667361 | 0,007751 | 0,957 | 0,964 | 1 |
| Napepld  | 0,667386 | 0,004491 | 0,312 | 0,327 | 1 |
| Fpgs     | 0,667388 | 0,009676 | 0,107 | 0,101 | 1 |
| Rffl     | 0,667418 | 0,009736 | 0,805 | 0,813 | 1 |
| Btrc     | 0,66745  | -0,005   | 0,325 | 0,337 | 1 |
| Polh     | 0,667477 | -0,00336 | 0,02  | 0,023 | 1 |
| Ostm1    | 0,66756  | -0,00838 | 0,376 | 0,387 | 1 |
| Ints7    | 0,667589 | 0,021138 | 0,415 | 0,411 | 1 |
| Xkr6     | 0,667658 | 0,028325 | 0,165 | 0,159 | 1 |
| Ankrd24  | 0,667784 | 0,012225 | 0,201 | 0,193 | 1 |
| Slc25a28 | 0,668096 | 0,014652 | 0,364 | 0,358 | 1 |
| Cyp20a1  | 0,668331 | -0,00152 | 0,565 | 0,585 | 1 |
| Pi4kb    | 0,668553 | -0,01269 | 0,216 | 0,224 | 1 |
| Rnase4   | 0,668959 | 0,043369 | 0,144 | 0,135 | 1 |
| Pex3     | 0,668991 | 0,000981 | 0,385 | 0,403 | 1 |
| Minpp1   | 0,669347 | -0,00564 | 0,322 | 0,333 | 1 |
| Wdr95    | 0,669382 | -0,00211 | 0,02  | 0,023 | 1 |
| Gapvd1   | 0,669523 | -0,01173 | 0,631 | 0,642 | 1 |
| Asb13    | 0,669629 | -0,00356 | 0,086 | 0,093 | 1 |
| R3hcc1l  | 0,66982  | 0,011868 | 0,238 | 0,255 | 1 |
| Nectin2  | 0,66984  | 0,007783 | 0,023 | 0,02  | 1 |
| Gm43689  | 0,669871 | -0,00481 | 0,005 | 0,007 | 1 |
| Rpgrip1  | 0,66991  | 0,002103 | 0,285 | 0,298 | 1 |
| Ndor1    | 0,670172 | -0,00413 | 0,071 | 0,076 | 1 |

|           |          |          |       |       |   |
|-----------|----------|----------|-------|-------|---|
| Smoc1     | 0,670265 | -0,00753 | 0,113 | 0,12  | 1 |
| Snrpb2    | 0,670414 | 0,024424 | 0,471 | 0,467 | 1 |
| Dcaf4     | 0,670425 | -0,01577 | 0,218 | 0,224 | 1 |
| Myo9b     | 0,67061  | 0,000594 | 0,314 | 0,327 | 1 |
| Tcerg1    | 0,670689 | -0,0232  | 0,389 | 0,393 | 1 |
| S100a13   | 0,670764 | -0,01125 | 0,935 | 0,948 | 1 |
| Mindy3    | 0,670835 | 0,026744 | 0,485 | 0,489 | 1 |
| Fubp3     | 0,670925 | -0,01333 | 0,54  | 0,546 | 1 |
| Pdp2      | 0,670943 | 0,025507 | 0,131 | 0,125 | 1 |
| Ctsz      | 0,670945 | -0,0038  | 0,751 | 0,767 | 1 |
| Hmgxb3    | 0,671137 | -0,01616 | 0,148 | 0,154 | 1 |
| Rbm8a     | 0,671194 | -0,00761 | 0,727 | 0,738 | 1 |
| Gm15972   | 0,671245 | 0,001507 | 0,045 | 0,041 | 1 |
| Gm4969    | 0,671409 | -0,0032  | 0,005 | 0,007 | 1 |
| Vmn1r218  | 0,671409 | -0,0032  | 0,005 | 0,007 | 1 |
| A230087F1 | 0,671409 | -0,0032  | 0,005 | 0,007 | 1 |
| Prlr      | 0,67141  | -0,00282 | 0,005 | 0,007 | 1 |
| Ier3ip1   | 0,671469 | 0,024347 | 0,641 | 0,644 | 1 |
| Atxn7l3   | 0,671488 | 0,018934 | 0,32  | 0,311 | 1 |
| Smim19    | 0,67152  | 0,021527 | 0,48  | 0,481 | 1 |
| Gm15492   | 0,671568 | -0,00403 | 0,017 | 0,02  | 1 |
| 2210408l2 | 0,67159  | -0,0044  | 0,097 | 0,104 | 1 |
| Ppp5c     | 0,6716   | -0,01146 | 0,418 | 0,436 | 1 |
| Pigg      | 0,671697 | 0,01073  | 0,132 | 0,125 | 1 |
| Clcn7     | 0,671969 | 0,007641 | 0,236 | 0,226 | 1 |
| Ccdc14    | 0,672054 | -0,00156 | 0,044 | 0,049 | 1 |
| Sirt2     | 0,672146 | 0,018304 | 0,999 | 0,998 | 1 |
| Igfbp5    | 0,672333 | -0,00866 | 0,005 | 0,007 | 1 |
| Slc7a6os  | 0,672389 | -0,00351 | 0,192 | 0,203 | 1 |
| Rnf43     | 0,672436 | 0,020162 | 0,221 | 0,211 | 1 |
| Ccdc12    | 0,672554 | -0,00947 | 0,636 | 0,657 | 1 |
| Gm17634   | 0,672641 | -0,00223 | 0,005 | 0,007 | 1 |
| Gm26899   | 0,672641 | -0,00223 | 0,005 | 0,007 | 1 |
| Gprc5d    | 0,672641 | -0,00286 | 0,005 | 0,007 | 1 |
| Cntd1     | 0,672872 | 0,004961 | 0,069 | 0,063 | 1 |
| Alkbh4    | 0,6729   | 0,008962 | 0,05  | 0,046 | 1 |
| Gm16897   | 0,672948 | -0,00159 | 0,005 | 0,007 | 1 |
| Fgf2      | 0,672948 | -0,00159 | 0,005 | 0,007 | 1 |
| Gm3764    | 0,672948 | -0,00159 | 0,005 | 0,007 | 1 |
| Gm42745   | 0,672948 | -0,00159 | 0,005 | 0,007 | 1 |
| Fam71f2   | 0,672948 | -0,00159 | 0,005 | 0,007 | 1 |
| Ccdc142   | 0,672948 | -0,00159 | 0,005 | 0,007 | 1 |
| Ccnd2     | 0,672948 | -0,00159 | 0,005 | 0,007 | 1 |
| Fbxo17    | 0,672948 | -0,00159 | 0,005 | 0,007 | 1 |
| Gm21750   | 0,672948 | -0,00159 | 0,005 | 0,007 | 1 |
| Sp6       | 0,672948 | -0,00159 | 0,005 | 0,007 | 1 |
| Gsdma     | 0,672948 | -0,00159 | 0,005 | 0,007 | 1 |
| Gm10184   | 0,672948 | -0,00159 | 0,005 | 0,007 | 1 |
| Sfrp5     | 0,672948 | -0,00159 | 0,005 | 0,007 | 1 |
| Rnf19b    | 0,67331  | -0,02603 | 0,139 | 0,146 | 1 |
| Adamts2   | 0,673377 | 0,008124 | 0,24  | 0,231 | 1 |
| Ppp3cc    | 0,673388 | 0,010529 | 0,222 | 0,213 | 1 |

|           |          |          |       |       |   |
|-----------|----------|----------|-------|-------|---|
| Cenpe     | 0,673509 | -0,0053  | 0,033 | 0,037 | 1 |
| Gabrr2    | 0,673525 | 0,002444 | 0,036 | 0,041 | 1 |
| Eps8l1    | 0,673538 | 0,004336 | 0,057 | 0,052 | 1 |
| Chst2     | 0,673542 | -0,03059 | 0,394 | 0,397 | 1 |
| Pi4k2a    | 0,673664 | -0,00262 | 0,32  | 0,33  | 1 |
| Gbe1      | 0,67368  | -0,00519 | 0,107 | 0,114 | 1 |
| Cyp2d22   | 0,673696 | 0,007624 | 0,082 | 0,089 | 1 |
| Cdk5r1    | 0,673759 | 0,001069 | 0,071 | 0,076 | 1 |
| Rps6kc1   | 0,673874 | 0,001001 | 0,173 | 0,182 | 1 |
| Zfp598    | 0,673905 | 0,001755 | 0,207 | 0,218 | 1 |
| Megf11    | 0,674156 | -0,00341 | 0,017 | 0,02  | 1 |
| 1810041L1 | 0,674182 | 0,007162 | 0,005 | 0,007 | 1 |
| 4933429H  | 0,674182 | 0,000363 | 0,005 | 0,007 | 1 |
| Rnf223    | 0,674182 | 0,000363 | 0,005 | 0,007 | 1 |
| Tmem150b  | 0,674182 | 0,000363 | 0,005 | 0,007 | 1 |
| Gm26562   | 0,674182 | 0,000363 | 0,005 | 0,007 | 1 |
| 1700102H  | 0,674182 | 0,000363 | 0,005 | 0,007 | 1 |
| AA543186  | 0,674182 | -0,00061 | 0,005 | 0,007 | 1 |
| Lhfp      | 0,674182 | -0,00061 | 0,005 | 0,007 | 1 |
| Gm16503   | 0,674182 | -0,00061 | 0,005 | 0,007 | 1 |
| Srrm3     | 0,674182 | -0,00061 | 0,005 | 0,007 | 1 |
| Ticrr     | 0,674182 | -0,00061 | 0,005 | 0,007 | 1 |
| Olfr635   | 0,674182 | -0,00061 | 0,005 | 0,007 | 1 |
| Creb3l3   | 0,674182 | -0,00061 | 0,005 | 0,007 | 1 |
| Slmapos2  | 0,674182 | -0,00061 | 0,005 | 0,007 | 1 |
| 2900052N  | 0,674182 | -0,00061 | 0,005 | 0,007 | 1 |
| Abcd2     | 0,674182 | -0,00061 | 0,005 | 0,007 | 1 |
| Dgkg      | 0,674182 | -0,00061 | 0,005 | 0,007 | 1 |
| Impg2     | 0,674182 | -0,00061 | 0,005 | 0,007 | 1 |
| Tmem39a   | 0,674221 | 0,020162 | 0,241 | 0,237 | 1 |
| Add1      | 0,67439  | -0,00458 | 0,9   | 0,888 | 1 |
| Tsc22d4   | 0,674421 | 0,01949  | 0,998 | 0,997 | 1 |
| Golgb1    | 0,67463  | 0,028613 | 0,594 | 0,584 | 1 |
| Slc22a23  | 0,674777 | 0,005234 | 0,582 | 0,564 | 1 |
| Srp9      | 0,675031 | 0,000454 | 0,716 | 0,737 | 1 |
| Atrx      | 0,675188 | -0,01408 | 0,901 | 0,906 | 1 |
| Zfp655    | 0,675203 | 0,021473 | 0,281 | 0,273 | 1 |
| Vmn1r43   | 0,675416 | 0,000363 | 0,005 | 0,007 | 1 |
| Cyp26b1   | 0,675497 | -4,7E-05 | 0,033 | 0,037 | 1 |
| Hdgf      | 0,67562  | 0,011959 | 0,87  | 0,885 | 1 |
| Gfra2     | 0,675725 | 0,00361  | 0,005 | 0,007 | 1 |
| Man2a1    | 0,67573  | 0,007687 | 0,061 | 0,067 | 1 |
| Pank2     | 0,675943 | -0,01226 | 0,201 | 0,21  | 1 |
| 3110043O  | 0,676168 | -0,00447 | 0,166 | 0,174 | 1 |
| Lgi3      | 0,676219 | 0,002794 | 0,923 | 0,904 | 1 |
| Fam135a   | 0,676419 | 0,012727 | 0,248 | 0,241 | 1 |
| Rpl35a    | 0,676449 | 0,023941 | 0,996 | 0,998 | 1 |
| Nudt16    | 0,676465 | -0,01115 | 0,224 | 0,233 | 1 |
| Fbxl2     | 0,67664  | -0,01583 | 0,079 | 0,085 | 1 |
| Nanos1    | 0,67665  | 0,00231  | 0,005 | 0,007 | 1 |
| Coil      | 0,676893 | 0,002171 | 0,126 | 0,133 | 1 |
| Kif1a     | 0,676917 | -0,00668 | 0,985 | 0,989 | 1 |

|           |          |          |       |       |   |
|-----------|----------|----------|-------|-------|---|
| Srgap3    | 0,676965 | -0,01203 | 0,466 | 0,48  | 1 |
| Rcc1      | 0,67707  | -0,00343 | 0,107 | 0,114 | 1 |
| Txndc9    | 0,677162 | -0,00973 | 0,623 | 0,649 | 1 |
| Efcab12   | 0,677243 | 0,004277 | 0,023 | 0,02  | 1 |
| 2810457G  | 0,677343 | -0,00702 | 0,03  | 0,034 | 1 |
| 2510002D  | 0,677349 | -0,00362 | 0,11  | 0,117 | 1 |
| Ndufa1    | 0,677383 | -0,00114 | 0,661 | 0,683 | 1 |
| Atxn7l1   | 0,677523 | 0,004416 | 0,113 | 0,106 | 1 |
| Pgpep1    | 0,677527 | 0,017766 | 0,134 | 0,128 | 1 |
| Stk38     | 0,677597 | -0,01118 | 0,317 | 0,332 | 1 |
| Kri1      | 0,677617 | 0,014529 | 0,198 | 0,213 | 1 |
| Gm26710   | 0,677795 | -0,01536 | 0,017 | 0,02  | 1 |
| Nadk2     | 0,677896 | -0,01969 | 0,368 | 0,376 | 1 |
| Snrk      | 0,677988 | -0,0118  | 0,162 | 0,169 | 1 |
| Bud31     | 0,678028 | 0,023743 | 0,543 | 0,54  | 1 |
| Pls1      | 0,678113 | -0,01164 | 0,93  | 0,922 | 1 |
| Ttll7     | 0,678235 | -0,00774 | 0,998 | 1     | 1 |
| Lppos     | 0,678351 | -0,00471 | 0,014 | 0,016 | 1 |
| Sf1       | 0,678381 | 0,012605 | 0,657 | 0,67  | 1 |
| Tm2d2     | 0,67851  | -0,01331 | 0,764 | 0,761 | 1 |
| Orc4      | 0,679053 | -0,01715 | 0,342 | 0,35  | 1 |
| Appbp2os  | 0,679109 | -0,00408 | 0,014 | 0,016 | 1 |
| Mcmbp     | 0,679204 | 0,024038 | 0,502 | 0,499 | 1 |
| Pigk      | 0,679206 | 0,006816 | 0,489 | 0,486 | 1 |
| Hist1h2ac | 0,679235 | -0,00699 | 0,011 | 0,013 | 1 |
| Spaca6    | 0,679297 | -0,01153 | 0,173 | 0,18  | 1 |
| Gm26747   | 0,679299 | 0,00301  | 0,023 | 0,02  | 1 |
| Ngrn      | 0,679345 | -0,01036 | 0,162 | 0,169 | 1 |
| 672042710 | 0,679359 | 0,001625 | 0,124 | 0,132 | 1 |
| Hist1h4c  | 0,679415 | 0,008119 | 0,014 | 0,011 | 1 |
| 1700056N  | 0,679415 | 0,007156 | 0,014 | 0,011 | 1 |
| H1fx      | 0,679657 | 0,006441 | 0,111 | 0,119 | 1 |
| Pdik1l    | 0,679708 | -0,01071 | 0,173 | 0,18  | 1 |
| Fahd2a    | 0,679989 | 0,000164 | 0,168 | 0,177 | 1 |
| Txn2      | 0,680157 | 0,022596 | 0,679 | 0,685 | 1 |
| Kcnip3    | 0,680544 | 0,006504 | 0,029 | 0,026 | 1 |
| Ptrh2     | 0,680553 | 0,008124 | 0,241 | 0,254 | 1 |
| Gfer      | 0,680616 | 0,016302 | 0,24  | 0,233 | 1 |
| Olfr655   | 0,680638 | 0,028686 | 0,014 | 0,011 | 1 |
| Nob1      | 0,680816 | 0,008691 | 0,213 | 0,226 | 1 |
| Mob4      | 0,680981 | 0,019081 | 0,54  | 0,533 | 1 |
| AC163040  | 0,681013 | -0,00374 | 0,014 | 0,016 | 1 |
| Lrwd1     | 0,681016 | 0,009807 | 0,144 | 0,137 | 1 |
| Asb8      | 0,681524 | -0,0108  | 0,341 | 0,346 | 1 |
| Caml      | 0,681535 | 0,018146 | 0,469 | 0,463 | 1 |
| Zkscan17  | 0,681544 | 0,013175 | 0,102 | 0,096 | 1 |
| Dhdds     | 0,681578 | 0,017292 | 0,357 | 0,35  | 1 |
| Bik       | 0,681608 | -0,00432 | 0,017 | 0,02  | 1 |
| Gm27010   | 0,681632 | 0,013804 | 0,093 | 0,088 | 1 |
| Dera      | 0,681673 | 0,009626 | 0,12  | 0,114 | 1 |
| Gm15283   | 0,681773 | -0,00248 | 0,014 | 0,016 | 1 |
| Ppp1r7    | 0,681849 | 0,019078 | 0,479 | 0,468 | 1 |



|           |          |          |       |       |   |
|-----------|----------|----------|-------|-------|---|
| Mir17hg   | 0,681953 | -0,00671 | 0,008 | 0,01  | 1 |
| Jrk       | 0,682195 | -0,00537 | 0,065 | 0,07  | 1 |
| Fam186a   | 0,682263 | 0,002655 | 0,014 | 0,011 | 1 |
| Emilin1   | 0,682441 | -0,00727 | 0,011 | 0,013 | 1 |
| Prkra     | 0,682621 | 0,00823  | 0,21  | 0,202 | 1 |
| Armcx6    | 0,682644 | 0,008307 | 0,067 | 0,062 | 1 |
| Stard6    | 0,682758 | 0,005554 | 0,029 | 0,026 | 1 |
| Fbrs      | 0,682769 | 0,008883 | 0,318 | 0,306 | 1 |
| Mki67     | 0,682777 | 0,001098 | 0,023 | 0,02  | 1 |
| Nudt2     | 0,682781 | 0,015206 | 0,321 | 0,312 | 1 |
| Ap2a2     | 0,682849 | -0,01373 | 0,595 | 0,6   | 1 |
| Pafah1b3  | 0,68292  | -0,00215 | 0,014 | 0,016 | 1 |
| Tex10     | 0,682987 | 0,009144 | 0,291 | 0,309 | 1 |
| Edc4      | 0,683065 | 0,005614 | 0,219 | 0,233 | 1 |
| Rtl8b     | 0,683134 | -0,00328 | 0,737 | 0,754 | 1 |
| Uxt       | 0,683258 | 0,006883 | 0,237 | 0,228 | 1 |
| Taf1a     | 0,683284 | 0,007913 | 0,107 | 0,101 | 1 |
| Tgoln1    | 0,683331 | -0,0055  | 0,894 | 0,914 | 1 |
| 4930563J1 | 0,683446 | -0,00413 | 0,008 | 0,01  | 1 |
| Vmn2r95   | 0,683446 | -0,00413 | 0,008 | 0,01  | 1 |
| Coa3      | 0,683555 | -0,00644 | 0,736 | 0,763 | 1 |
| Stk39     | 0,683631 | 0,006114 | 0,767 | 0,792 | 1 |
| Gm20457   | 0,68368  | -0,00152 | 0,014 | 0,016 | 1 |
| B2302170  | 0,683687 | 0,001689 | 0,014 | 0,011 | 1 |
| Atic      | 0,683772 | 0,003297 | 0,297 | 0,312 | 1 |
| Gemin4    | 0,683935 | -0,00539 | 0,011 | 0,013 | 1 |
| Tmppe     | 0,683943 | -0,0035  | 0,008 | 0,01  | 1 |
| Ppp1r18   | 0,683943 | -0,0035  | 0,008 | 0,01  | 1 |
| Prdm11    | 0,683944 | -0,00316 | 0,008 | 0,01  | 1 |
| Cnot2     | 0,68396  | 0,039794 | 0,369 | 0,369 | 1 |
| Tmbim4    | 0,683971 | 0,025053 | 0,772 | 0,772 | 1 |
| Elovl4    | 0,684036 | -0,01196 | 0,153 | 0,161 | 1 |
| Zfp975    | 0,684094 | -0,00404 | 0,049 | 0,054 | 1 |
| Rabl6     | 0,684139 | -0,01411 | 0,405 | 0,413 | 1 |
| Ndufa4    | 0,684253 | 0,001618 | 0,973 | 0,977 | 1 |
| Cul1      | 0,684415 | -0,00604 | 0,667 | 0,681 | 1 |
| Ciao1     | 0,68452  | 0,01     | 0,326 | 0,348 | 1 |
| Dnal1     | 0,684741 | -0,00568 | 0,169 | 0,177 | 1 |
| Dtx3      | 0,684751 | 0,031772 | 0,476 | 0,476 | 1 |
| Snx12     | 0,684908 | -0,0089  | 0,233 | 0,241 | 1 |
| Homer3    | 0,684988 | 0,016305 | 0,3   | 0,294 | 1 |
| Psmc6     | 0,685044 | 0,007707 | 0,824 | 0,834 | 1 |
| Zfp423    | 0,685112 | 0,000721 | 0,014 | 0,011 | 1 |
| Tube1     | 0,685114 | 0,003653 | 0,029 | 0,026 | 1 |
| Wnt4      | 0,685115 | 0,001052 | 0,014 | 0,011 | 1 |
| Asf1a     | 0,685197 | -0,00687 | 0,388 | 0,4   | 1 |
| Siae      | 0,68522  | -0,01046 | 0,16  | 0,167 | 1 |
| Ln timer  | 0,685222 | -0,01028 | 0,526 | 0,53  | 1 |
| Hnrnpa1   | 0,685226 | 0,005104 | 0,827 | 0,824 | 1 |
| Fbxl3     | 0,685259 | 0,025749 | 0,756 | 0,774 | 1 |
| Ccl27a    | 0,685279 | 0,004    | 0,043 | 0,039 | 1 |
| Noc2l     | 0,685338 | 0,021513 | 0,314 | 0,307 | 1 |

|           |          |          |       |       |   |
|-----------|----------|----------|-------|-------|---|
| Sp7       | 0,685381 | 0,007249 | 0,152 | 0,145 | 1 |
| Gm16751   | 0,685436 | -0,00152 | 0,011 | 0,013 | 1 |
| Dhrs11    | 0,685436 | -0,00248 | 0,011 | 0,013 | 1 |
| 1500002C: | 0,685438 | -0,00252 | 0,008 | 0,01  | 1 |
| Gm16754   | 0,685438 | -0,00252 | 0,008 | 0,01  | 1 |
| Hoxa1     | 0,685589 | 0,002345 | 0,014 | 0,016 | 1 |
| Timm10b   | 0,685599 | -0,0042  | 0,603 | 0,608 | 1 |
| Dnajc14   | 0,685607 | -0,01004 | 0,328 | 0,333 | 1 |
| Erc4      | 0,685681 | 0,01014  | 0,18  | 0,19  | 1 |
| Gm16973   | 0,685773 | -0,00077 | 0,063 | 0,068 | 1 |
| Actr2     | 0,685779 | -0,0108  | 0,756 | 0,771 | 1 |
| Dpp6      | 0,685784 | -0,00052 | 0,014 | 0,016 | 1 |
| Srsf11    | 0,685799 | -0,01171 | 0,887 | 0,909 | 1 |
| Sac3d1    | 0,685799 | -0,00376 | 0,155 | 0,164 | 1 |
| AC124739. | 0,685935 | -0,00189 | 0,008 | 0,01  | 1 |
| Gm26513   | 0,685935 | -0,00189 | 0,008 | 0,01  | 1 |
| Nrn1l     | 0,686021 | 0,005571 | 0,082 | 0,076 | 1 |
| Gm48882   | 0,68629  | -0,00219 | 0,011 | 0,013 | 1 |
| Tiam2     | 0,68629  | -0,00219 | 0,011 | 0,013 | 1 |
| Nr2f1     | 0,686357 | 0,000113 | 0,014 | 0,016 | 1 |
| Ptges2    | 0,686435 | 0,001701 | 0,27  | 0,281 | 1 |
| Gm26545   | 0,686685 | -0,00219 | 0,008 | 0,01  | 1 |
| Cspg4     | 0,686722 | -0,00248 | 0,011 | 0,013 | 1 |
| Ss18l1    | 0,686823 | 0,008825 | 0,097 | 0,091 | 1 |
| Usp21     | 0,686838 | 0,014774 | 0,183 | 0,176 | 1 |
| Tmem167b  | 0,686909 | 0,002429 | 0,333 | 0,322 | 1 |
| 3100002H: | 0,686929 | 0,001709 | 0,014 | 0,016 | 1 |
| 4930532G: | 0,686934 | -0,00155 | 0,008 | 0,01  | 1 |
| Tal2      | 0,686934 | -0,00155 | 0,008 | 0,01  | 1 |
| Rnf157    | 0,68694  | -0,008   | 0,177 | 0,184 | 1 |
| Ncor1     | 0,687072 | 0,00809  | 0,909 | 0,906 | 1 |
| Fuk       | 0,687119 | -0,00171 | 0,068 | 0,073 | 1 |
| Ttf2      | 0,687183 | 0,00039  | 0,008 | 0,01  | 1 |
| Slc39a14  | 0,68721  | 0,034688 | 0,209 | 0,203 | 1 |
| Me1       | 0,687265 | 0,006405 | 0,459 | 0,446 | 1 |
| Mmp2      | 0,687352 | 0,006183 | 0,036 | 0,033 | 1 |
| Gm28230   | 0,687364 | -0,00152 | 0,011 | 0,013 | 1 |
| Socs5     | 0,687399 | -0,00252 | 0,287 | 0,301 | 1 |
| Kcnd1     | 0,687432 | 0,002968 | 0,008 | 0,01  | 1 |
| Gm16386   | 0,687432 | 5,69E-05 | 0,008 | 0,01  | 1 |
| Itga3     | 0,687432 | -0,00092 | 0,008 | 0,01  | 1 |
| Npff      | 0,687433 | 0,002655 | 0,008 | 0,01  | 1 |
| Bcl7b     | 0,687436 | -0,01243 | 0,548 | 0,569 | 1 |
| Zfp623    | 0,687452 | 0,010994 | 0,077 | 0,072 | 1 |
| Tulp2     | 0,687579 | -0,00088 | 0,011 | 0,013 | 1 |
| Slc35a4   | 0,687779 | 0,003092 | 0,445 | 0,465 | 1 |
| Bscl2     | 0,687847 | 0,021431 | 0,382 | 0,376 | 1 |
| Krt28     | 0,687969 | -0,00088 | 0,014 | 0,011 | 1 |
| 1810062O: | 0,688006 | -0,00122 | 0,011 | 0,013 | 1 |
| Hyls1     | 0,688006 | -0,00122 | 0,011 | 0,013 | 1 |
| Zfp808    | 0,688006 | -0,00122 | 0,011 | 0,013 | 1 |
| Gosr1     | 0,688127 | -0,01237 | 0,431 | 0,441 | 1 |

|          |          |          |       |       |   |
|----------|----------|----------|-------|-------|---|
| Gls      | 0,688281 | 0,029216 | 0,525 | 0,517 | 1 |
| Ube2r2   | 0,688315 | 0,012853 | 0,621 | 0,62  | 1 |
| Clcc1    | 0,688492 | -0,01845 | 0,368 | 0,372 | 1 |
| Acot7    | 0,688639 | -0,00776 | 0,942 | 0,933 | 1 |
| Ints13   | 0,688751 | 0,01358  | 0,28  | 0,273 | 1 |
| Lrp3     | 0,688929 | 0,001999 | 0,008 | 0,01  | 1 |
| Ubr1     | 0,689231 | 0,022943 | 0,47  | 0,476 | 1 |
| Schip1   | 0,689333 | 0,01992  | 0,36  | 0,38  | 1 |
| Gm10643  | 0,689413 | 0,002345 | 0,014 | 0,016 | 1 |
| Cdk5r2   | 0,689724 | -0,00025 | 0,011 | 0,013 | 1 |
| Slc26a6  | 0,689724 | 0,000721 | 0,011 | 0,013 | 1 |
| Cacul1   | 0,68988  | 0,022117 | 0,389 | 0,384 | 1 |
| Mad1l1   | 0,690125 | 0,004451 | 0,297 | 0,309 | 1 |
| Rad51ap1 | 0,690428 | 0,006837 | 0,008 | 0,01  | 1 |
| Serinc3  | 0,690541 | -0,00892 | 0,913 | 0,92  | 1 |
| Snip1    | 0,690552 | -0,01107 | 0,174 | 0,18  | 1 |
| Ankrd49  | 0,690634 | -0,00325 | 0,36  | 0,371 | 1 |
| Sec62    | 0,690648 | -0,00056 | 0,998 | 0,997 | 1 |
| Luc7l3   | 0,69085  | -0,00509 | 0,928 | 0,93  | 1 |
| Sucla2   | 0,691031 | -0,00357 | 0,425 | 0,444 | 1 |
| Fxyd7    | 0,691146 | -0,13779 | 0,116 | 0,12  | 1 |
| Ccdc124  | 0,69151  | -0,02381 | 0,6   | 0,592 | 1 |
| Ms4a6c   | 0,69152  | 0,008424 | 0,021 | 0,018 | 1 |
| Slx4ip   | 0,691706 | 0,017715 | 0,132 | 0,127 | 1 |
| Cers2    | 0,691776 | -0,01172 | 0,996 | 0,998 | 1 |
| Junos    | 0,691928 | 0,001999 | 0,008 | 0,01  | 1 |
| Phykpl   | 0,691993 | 0,019799 | 0,139 | 0,133 | 1 |
| Tmem41a  | 0,69211  | 0,011064 | 0,065 | 0,06  | 1 |
| Carm1    | 0,692352 | 0,011368 | 0,214 | 0,207 | 1 |
| Coro1b   | 0,692405 | 0,012033 | 0,454 | 0,447 | 1 |
| Mrpl12   | 0,692419 | 0,01957  | 0,58  | 0,579 | 1 |
| Stk38l   | 0,692463 | -0,00812 | 0,195 | 0,203 | 1 |
| Mllt11   | 0,692503 | 0,013839 | 0,167 | 0,161 | 1 |
| Tysnd1   | 0,692596 | 0,005095 | 0,237 | 0,226 | 1 |
| Dnttip1  | 0,692917 | 0,022725 | 0,336 | 0,332 | 1 |
| Crebzf   | 0,692971 | 0,013892 | 0,644 | 0,676 | 1 |
| Abcd4    | 0,693091 | -0,00877 | 0,286 | 0,296 | 1 |
| Scrib    | 0,69312  | 0,002368 | 0,306 | 0,32  | 1 |
| Ttc19    | 0,693217 | 0,01957  | 0,32  | 0,314 | 1 |
| Adipor1  | 0,693464 | 0,007658 | 0,804 | 0,828 | 1 |
| Mecp2    | 0,693696 | 0,028691 | 0,696 | 0,68  | 1 |
| AI837181 | 0,69389  | 0,025874 | 0,365 | 0,363 | 1 |
| Dhx34    | 0,693954 | 0,008231 | 0,1   | 0,094 | 1 |
| Zfp605   | 0,694126 | 0,005871 | 0,187 | 0,179 | 1 |
| Cog3     | 0,694237 | -0,00596 | 0,214 | 0,223 | 1 |
| Tmem229k | 0,694331 | -0,00259 | 0,073 | 0,078 | 1 |
| Armc9    | 0,694372 | 0,019975 | 0,143 | 0,138 | 1 |
| Tmco1    | 0,694433 | 0,021078 | 0,729 | 0,74  | 1 |
| Mettl21a | 0,694477 | 0,011097 | 0,115 | 0,109 | 1 |
| Wls      | 0,694681 | 0,021458 | 0,78  | 0,79  | 1 |
| 1110051M | 0,694822 | 0,008684 | 0,307 | 0,325 | 1 |
| Trim62   | 0,694886 | 0,010427 | 0,065 | 0,06  | 1 |

|          |          |          |       |       |   |
|----------|----------|----------|-------|-------|---|
| Sspn     | 0,694906 | 0,015912 | 0,478 | 0,47  | 1 |
| Tmem256  | 0,694964 | 0,01435  | 0,948 | 0,945 | 1 |
| Rab3b    | 0,69504  | -0,00884 | 0,204 | 0,211 | 1 |
| Hmces    | 0,695107 | 0,004223 | 0,167 | 0,159 | 1 |
| Btbd9    | 0,69538  | -0,0006  | 0,375 | 0,385 | 1 |
| Dtnb     | 0,695392 | 0,01233  | 0,103 | 0,098 | 1 |
| Fam96a   | 0,695399 | 0,001739 | 0,408 | 0,428 | 1 |
| Fip1l1   | 0,695563 | 0,019359 | 0,653 | 0,657 | 1 |
| Ythdc1   | 0,695827 | 0,018342 | 0,71  | 0,709 | 1 |
| Pcdhgb1  | 0,695849 | 0,002686 | 0,021 | 0,018 | 1 |
| Sec22c   | 0,696001 | -0,01108 | 0,129 | 0,135 | 1 |
| Mrpl39   | 0,696068 | -0,00679 | 0,224 | 0,233 | 1 |
| Nkain2   | 0,696162 | -0,00043 | 0,858 | 0,849 | 1 |
| 9130401M | 0,696184 | -0,00354 | 0,298 | 0,309 | 1 |
| Stxbp3   | 0,696223 | -0,00317 | 0,919 | 0,904 | 1 |
| C030006K | 0,69641  | 0,012222 | 0,157 | 0,151 | 1 |
| Zfp563   | 0,696426 | -0,00596 | 0,085 | 0,091 | 1 |
| Lrrc4b   | 0,696527 | 0,028527 | 0,818 | 0,811 | 1 |
| Zfp229   | 0,696539 | -0,00446 | 0,035 | 0,039 | 1 |
| Dnaja3   | 0,696704 | 0,005441 | 0,378 | 0,397 | 1 |
| Rbm12b1  | 0,696867 | 0,007309 | 0,122 | 0,115 | 1 |
| Eif1     | 0,696916 | -0,00697 | 1     | 1     | 1 |
| Map2k1   | 0,697038 | 0,000994 | 0,541 | 0,556 | 1 |
| Med20    | 0,697074 | 0,000286 | 0,269 | 0,278 | 1 |
| Plekhh1  | 0,697095 | -0,022   | 0,97  | 0,972 | 1 |
| Aatf     | 0,697295 | 0,022558 | 0,293 | 0,291 | 1 |
| Tcf3     | 0,697449 | 0,007403 | 0,36  | 0,377 | 1 |
| Wac      | 0,697516 | -0,00609 | 0,648 | 0,665 | 1 |
| Hk1      | 0,697519 | 0,030828 | 0,289 | 0,285 | 1 |
| Zfp551   | 0,697538 | 0,007444 | 0,034 | 0,031 | 1 |
| Psm7     | 0,697607 | 0,018058 | 0,883 | 0,876 | 1 |
| Zfp748   | 0,697656 | 0,012068 | 0,183 | 0,176 | 1 |
| Tmem165  | 0,69766  | 0,010777 | 0,522 | 0,514 | 1 |
| Bfar     | 0,697756 | 0,026429 | 0,387 | 0,384 | 1 |
| Rap2c    | 0,697778 | 0,001092 | 0,237 | 0,247 | 1 |
| Cep250   | 0,69787  | 0,024215 | 0,199 | 0,213 | 1 |
| Brf2     | 0,697873 | 0,000261 | 0,143 | 0,151 | 1 |
| Aarsd1   | 0,698142 | -0,00514 | 0,111 | 0,117 | 1 |
| Ndufa3   | 0,698178 | -0,00063 | 0,984 | 0,985 | 1 |
| Pef1     | 0,698188 | -0,00818 | 0,342 | 0,353 | 1 |
| Rfesd    | 0,698286 | -0,00935 | 0,161 | 0,167 | 1 |
| Clk3     | 0,698406 | 0,009349 | 0,309 | 0,324 | 1 |
| Llph     | 0,698661 | -0,01689 | 0,582 | 0,585 | 1 |
| Selenbp1 | 0,698663 | -0,00276 | 0,235 | 0,244 | 1 |
| Zkscan6  | 0,698668 | -0,00093 | 0,088 | 0,094 | 1 |
| Pdxdc1   | 0,698739 | -0,00063 | 0,68  | 0,691 | 1 |
| Ppm1d    | 0,698937 | -0,00654 | 0,254 | 0,239 | 1 |
| Ccdc138  | 0,699069 | 0,004343 | 0,055 | 0,05  | 1 |
| Rpl17    | 0,6991   | -0,01049 | 0,986 | 0,995 | 1 |
| Tgfbp1   | 0,699239 | -0,00905 | 0,344 | 0,353 | 1 |
| Zfp30    | 0,699286 | -0,00272 | 0,137 | 0,145 | 1 |
| Cst6     | 0,699352 | 0,008098 | 0,021 | 0,018 | 1 |

|          |          |          |       |       |   |
|----------|----------|----------|-------|-------|---|
| Asl      | 0,699366 | 0,005294 | 0,115 | 0,109 | 1 |
| Daglb    | 0,699688 | 0,002    | 0,325 | 0,34  | 1 |
| Gm4631   | 0,699964 | -0,0001  | 0,131 | 0,124 | 1 |
| Arpp19   | 0,700022 | -0,00894 | 0,94  | 0,93  | 1 |
| Bag4     | 0,700106 | -0,00701 | 0,311 | 0,322 | 1 |
| Fars2    | 0,700137 | 0,016803 | 0,203 | 0,197 | 1 |
| Nqo2     | 0,700642 | 0,003982 | 0,034 | 0,031 | 1 |
| Kdm1a    | 0,700696 | -0,00308 | 0,504 | 0,528 | 1 |
| Ankrd9   | 0,700973 | -0,00441 | 0,07  | 0,075 | 1 |
| Atg16l1  | 0,700994 | 0,001739 | 0,314 | 0,332 | 1 |
| Tex9     | 0,701154 | -0,00642 | 0,111 | 0,117 | 1 |
| Nup35    | 0,701506 | 0,006111 | 0,282 | 0,294 | 1 |
| Rnf32    | 0,701569 | -0,01116 | 0,077 | 0,081 | 1 |
| Prpf31   | 0,701617 | -0,00473 | 0,379 | 0,389 | 1 |
| Grb2     | 0,701732 | 0,022746 | 0,74  | 0,737 | 1 |
| Zfp532   | 0,701881 | -0,04014 | 0,559 | 0,545 | 1 |
| Fam161a  | 0,701957 | -0,01231 | 0,064 | 0,068 | 1 |
| Pgm1     | 0,70198  | 0,014094 | 0,058 | 0,063 | 1 |
| Opalin   | 0,702034 | 0,026777 | 0,782 | 0,743 | 1 |
| Gm15510  | 0,702307 | 0,003937 | 0,012 | 0,01  | 1 |
| Pcp4l1   | 0,702307 | 0,004904 | 0,012 | 0,01  | 1 |
| Dnajc13  | 0,702342 | 0,00133  | 0,347 | 0,361 | 1 |
| Al504432 | 0,702383 | -0,01168 | 0,267 | 0,272 | 1 |
| Arid5b   | 0,702574 | 0,036796 | 0,722 | 0,741 | 1 |
| Pfdn1    | 0,702663 | 0,000447 | 0,638 | 0,676 | 1 |
| Phlpp2   | 0,702719 | -0,00294 | 0,114 | 0,12  | 1 |
| Tdrd7    | 0,702781 | 0,004158 | 0,255 | 0,267 | 1 |
| Ythdf1   | 0,702783 | -0,00453 | 0,389 | 0,398 | 1 |
| Tmx1     | 0,702886 | -0,00843 | 0,418 | 0,426 | 1 |
| Rnf146   | 0,702914 | 0,016282 | 0,488 | 0,488 | 1 |
| Supt3    | 0,703336 | -0,00788 | 0,312 | 0,324 | 1 |
| Vps13d   | 0,703634 | 0,00563  | 0,264 | 0,278 | 1 |
| Sap30    | 0,703639 | 0,002968 | 0,012 | 0,01  | 1 |
| 2610035D | 0,703736 | -0,00351 | 0,238 | 0,247 | 1 |
| Slc25a4  | 0,703874 | 0,012067 | 0,996 | 0,997 | 1 |
| Cbx1     | 0,703991 | 0,00867  | 0,695 | 0,685 | 1 |
| D030056L | 0,704174 | -0,00647 | 0,367 | 0,374 | 1 |
| Cox7a1   | 0,704193 | 0,001075 | 0,021 | 0,018 | 1 |
| Lrrc8b   | 0,704253 | 0,003473 | 0,811 | 0,821 | 1 |
| Kcna2    | 0,704475 | 0,029769 | 0,217 | 0,211 | 1 |
| Zdhhc23  | 0,704507 | -0,01264 | 0,077 | 0,081 | 1 |
| Il10rb   | 0,704529 | 0,004262 | 0,012 | 0,01  | 1 |
| Lgi4     | 0,704535 | 0,000612 | 0,239 | 0,229 | 1 |
| Ccl25    | 0,704606 | -0,01468 | 0,117 | 0,122 | 1 |
| Zfp87    | 0,704732 | -0,00182 | 0,164 | 0,154 | 1 |
| Wdr31    | 0,704751 | 0,003295 | 0,012 | 0,01  | 1 |
| Prdx3    | 0,704798 | -0,00509 | 0,533 | 0,537 | 1 |
| Kdsr     | 0,704959 | -0,00206 | 0,683 | 0,706 | 1 |
| Grhl1    | 0,704971 | 0,001999 | 0,012 | 0,01  | 1 |
| Etnk1    | 0,705106 | 0,007606 | 0,926 | 0,915 | 1 |
| Rab13    | 0,70525  | 0,005566 | 0,065 | 0,06  | 1 |
| Ccdc152  | 0,705478 | -0,01865 | 0,17  | 0,176 | 1 |

|           |          |          |       |       |   |
|-----------|----------|----------|-------|-------|---|
| Uros      | 0,705678 | 0,012006 | 0,153 | 0,146 | 1 |
| Erh       | 0,705779 | 0,019026 | 0,57  | 0,569 | 1 |
| Sec22a    | 0,705953 | -0,00731 | 0,237 | 0,244 | 1 |
| Gm26764   | 0,705992 | -0,01506 | 0,032 | 0,036 | 1 |
| Cox20     | 0,706017 | 0,021635 | 0,436 | 0,434 | 1 |
| Rab3gap1  | 0,706128 | 0,019741 | 0,472 | 0,465 | 1 |
| Gm13166   | 0,706307 | 0,001359 | 0,012 | 0,01  | 1 |
| Gm6994    | 0,706307 | 0,001359 | 0,012 | 0,01  | 1 |
| Sgcb      | 0,706599 | 0,027483 | 0,663 | 0,649 | 1 |
| Stard4    | 0,706682 | 0,029791 | 0,289 | 0,283 | 1 |
| Arl14ep   | 0,706958 | -0,00765 | 0,283 | 0,291 | 1 |
| Zmat2     | 0,707066 | -0,01013 | 0,868 | 0,876 | 1 |
| Arl10     | 0,707176 | -0,00199 | 0,106 | 0,112 | 1 |
| Zswim7    | 0,707446 | 0,014632 | 0,194 | 0,189 | 1 |
| Tldc1     | 0,707705 | -0,00034 | 0,046 | 0,05  | 1 |
| Slc25a20  | 0,707888 | 0,009851 | 0,052 | 0,057 | 1 |
| Znrf1     | 0,707907 | 0,006531 | 0,34  | 0,35  | 1 |
| Crip1     | 0,708064 | -0,00441 | 0,148 | 0,141 | 1 |
| Tyw1      | 0,708611 | -0,02111 | 0,273 | 0,276 | 1 |
| Nsd2      | 0,708806 | -0,00263 | 0,5   | 0,509 | 1 |
| Chchd6    | 0,708849 | -0,00619 | 0,24  | 0,249 | 1 |
| Frrs1l    | 0,708854 | 0,004336 | 0,053 | 0,049 | 1 |
| Cmtm6     | 0,708879 | -0,01194 | 0,272 | 0,278 | 1 |
| Arl2      | 0,708912 | -0,00136 | 0,966 | 0,961 | 1 |
| BC024063  | 0,708961 | -0,00508 | 0,032 | 0,036 | 1 |
| Bcl9l     | 0,708972 | 0,012847 | 0,449 | 0,476 | 1 |
| Dnajb9    | 0,709015 | -0,00336 | 0,489 | 0,468 | 1 |
| Rabggta   | 0,709168 | -0,00084 | 0,222 | 0,231 | 1 |
| Samd4     | 0,70982  | 0,030812 | 0,378 | 0,379 | 1 |
| Tmem205   | 0,709911 | -0,00922 | 0,676 | 0,678 | 1 |
| Bcap29    | 0,710044 | -0,0007  | 0,315 | 0,325 | 1 |
| Kcnma1    | 0,710115 | 0,029085 | 0,193 | 0,189 | 1 |
| Unc93b1   | 0,710382 | -0,01006 | 0,156 | 0,163 | 1 |
| Mta1      | 0,710448 | -0,02017 | 0,294 | 0,299 | 1 |
| Tmco6     | 0,710462 | 0,010281 | 0,158 | 0,151 | 1 |
| Gm37305   | 0,710679 | 0,010312 | 0,026 | 0,023 | 1 |
| Fbxo21    | 0,710822 | 0,004314 | 0,688 | 0,701 | 1 |
| Zfp51     | 0,711116 | -0,00354 | 0,067 | 0,072 | 1 |
| Ints4     | 0,711118 | 0,00305  | 0,356 | 0,369 | 1 |
| Marc2     | 0,711129 | 0,006957 | 0,529 | 0,515 | 1 |
| Syvn1     | 0,711223 | 0,016229 | 0,289 | 0,283 | 1 |
| Rab11fip2 | 0,711418 | 0,004748 | 0,594 | 0,608 | 1 |
| Serpinc1  | 0,711525 | 0,000519 | 0,027 | 0,024 | 1 |
| Gnao1     | 0,711594 | 0,001641 | 0,998 | 0,998 | 1 |
| Rad50     | 0,71182  | 0,01161  | 0,245 | 0,259 | 1 |
| Bub3      | 0,711834 | -0,00688 | 0,86  | 0,855 | 1 |
| Creg1     | 0,711919 | -0,00161 | 0,321 | 0,33  | 1 |
| Epb41l5   | 0,712121 | 0,007747 | 0,039 | 0,036 | 1 |
| Ift172    | 0,712175 | -0,00782 | 0,168 | 0,174 | 1 |
| Vars      | 0,712402 | 0,006872 | 0,248 | 0,239 | 1 |
| Lmf2      | 0,712452 | 0,019937 | 0,297 | 0,293 | 1 |
| Hmgb1     | 0,712639 | 0,004212 | 0,997 | 0,998 | 1 |

|           |          |          |       |       |   |
|-----------|----------|----------|-------|-------|---|
| Gmeb2     | 0,712736 | -0,00111 | 0,14  | 0,148 | 1 |
| Faxc      | 0,712739 | 0,000913 | 0,046 | 0,05  | 1 |
| Arhgap12  | 0,712777 | 0,022678 | 0,271 | 0,286 | 1 |
| Mxd4      | 0,712862 | 0,003133 | 0,815 | 0,823 | 1 |
| Stk16     | 0,713173 | -0,01894 | 0,473 | 0,468 | 1 |
| Fmn1      | 0,713205 | -0,01644 | 0,245 | 0,234 | 1 |
| Mcee      | 0,713506 | 0,025221 | 0,593 | 0,602 | 1 |
| 6330562C: | 0,71356  | 0,010325 | 0,091 | 0,086 | 1 |
| Abhd17b   | 0,713693 | 0,001894 | 0,831 | 0,847 | 1 |
| Tm2d3     | 0,713721 | -0,00222 | 0,394 | 0,407 | 1 |
| Mrpl22    | 0,71376  | -0,00433 | 0,229 | 0,237 | 1 |
| Plvap     | 0,713782 | 0,002171 | 0,09  | 0,096 | 1 |
| Fam219a   | 0,713819 | 0,025205 | 0,449 | 0,455 | 1 |
| Kdelc1    | 0,713846 | -0,01401 | 0,101 | 0,106 | 1 |
| Zfp189    | 0,71396  | -0,00996 | 0,061 | 0,065 | 1 |
| Smarcc2   | 0,714169 | 0,013667 | 0,746 | 0,745 | 1 |
| Zfp280c   | 0,714263 | -0,00687 | 0,492 | 0,499 | 1 |
| Snpc5     | 0,714445 | 0,018934 | 0,569 | 0,571 | 1 |
| Fbxl16    | 0,714623 | -0,00295 | 0,032 | 0,036 | 1 |
| Lockd     | 0,714896 | 0,008411 | 0,026 | 0,023 | 1 |
| Chd8      | 0,715268 | -0,01805 | 0,579 | 0,569 | 1 |
| Zbtb49    | 0,715311 | -0,00386 | 0,059 | 0,063 | 1 |
| Zc3h6     | 0,715348 | -0,0002  | 0,176 | 0,185 | 1 |
| Smarca2   | 0,715385 | 0,0233   | 0,616 | 0,647 | 1 |
| Chchd1    | 0,715587 | -0,0093  | 0,693 | 0,704 | 1 |
| Toe1      | 0,715659 | -0,01566 | 0,181 | 0,187 | 1 |
| Setbp1    | 0,715706 | -0,01075 | 0,153 | 0,159 | 1 |
| Phf20     | 0,715963 | 0,016776 | 0,693 | 0,694 | 1 |
| Ppil1     | 0,715991 | -0,00568 | 0,188 | 0,197 | 1 |
| Tmco3     | 0,716056 | 0,018108 | 0,6   | 0,605 | 1 |
| Lrrc40    | 0,716189 | -0,00249 | 0,119 | 0,125 | 1 |
| Gltp      | 0,716222 | -0,0039  | 0,996 | 1     | 1 |
| Rpp38     | 0,716387 | 0,005292 | 0,111 | 0,106 | 1 |
| Lix1      | 0,71639  | -0,00049 | 0,022 | 0,024 | 1 |
| Zfp493    | 0,716463 | 0,00556  | 0,046 | 0,042 | 1 |
| Kansl1    | 0,716632 | -0,01431 | 0,522 | 0,527 | 1 |
| Myc       | 0,716639 | 0,018072 | 0,058 | 0,054 | 1 |
| Depdc1b   | 0,716642 | 0,00773  | 0,051 | 0,047 | 1 |
| Mipol1    | 0,716907 | -0,00152 | 0,194 | 0,203 | 1 |
| Smg7      | 0,717142 | 0,001925 | 0,379 | 0,392 | 1 |
| Armcx4    | 0,71724  | 0,01369  | 0,032 | 0,029 | 1 |
| Pcyt1a    | 0,717251 | -0,02417 | 0,448 | 0,46  | 1 |
| Arl5b     | 0,717283 | 0,012407 | 0,152 | 0,161 | 1 |
| Cox7c     | 0,717292 | 0,002162 | 0,998 | 0,998 | 1 |
| Echs1     | 0,717515 | 0,005325 | 0,824 | 0,857 | 1 |
| Klhl18    | 0,717578 | 0,002387 | 0,24  | 0,25  | 1 |
| Vps37a    | 0,717687 | 0,004932 | 0,466 | 0,483 | 1 |
| Camk2g    | 0,717725 | 0,003668 | 0,147 | 0,154 | 1 |
| Gm10244   | 0,717961 | -0,00207 | 0,022 | 0,024 | 1 |
| Spen      | 0,718074 | 0,010187 | 0,514 | 0,511 | 1 |
| Lmx1b     | 0,71812  | -0,00227 | 0,001 | 0,002 | 1 |
| Rnf138rt1 | 0,71812  | -0,00227 | 0,001 | 0,002 | 1 |

|           |          |          |       |       |   |
|-----------|----------|----------|-------|-------|---|
| Gm12968   | 0,71812  | -0,00227 | 0,001 | 0,002 | 1 |
| Steap2    | 0,71812  | -0,00227 | 0,001 | 0,002 | 1 |
| Wnt7a     | 0,71812  | -0,00227 | 0,001 | 0,002 | 1 |
| Fam19a1   | 0,71812  | -0,00227 | 0,001 | 0,002 | 1 |
| Fam189a1  | 0,71812  | -0,00227 | 0,001 | 0,002 | 1 |
| Rhobtb1   | 0,71812  | -0,00227 | 0,001 | 0,002 | 1 |
| Plxnc1    | 0,71812  | -0,00227 | 0,001 | 0,002 | 1 |
| Cbfa2t3   | 0,71812  | -0,00227 | 0,001 | 0,002 | 1 |
| Slc35f4   | 0,71812  | -0,00227 | 0,001 | 0,002 | 1 |
| Cxcl16    | 0,71812  | -0,00227 | 0,001 | 0,002 | 1 |
| Haspin    | 0,71812  | -0,00227 | 0,001 | 0,002 | 1 |
| Zfp184    | 0,71812  | -0,00227 | 0,001 | 0,002 | 1 |
| Gm1604a   | 0,71812  | -0,00227 | 0,001 | 0,002 | 1 |
| Entpd1    | 0,71812  | -0,00227 | 0,001 | 0,002 | 1 |
| Sycp2     | 0,71812  | -0,00389 | 0,001 | 0,002 | 1 |
| Pi15      | 0,71812  | -0,0055  | 0,001 | 0,002 | 1 |
| Mrps11    | 0,718143 | -0,0053  | 0,321 | 0,33  | 1 |
| Adcy3     | 0,718166 | 0,006186 | 0,032 | 0,029 | 1 |
| Cd164     | 0,718264 | 0,009955 | 0,504 | 0,528 | 1 |
| Fbxw2     | 0,718507 | 0,017375 | 0,397 | 0,389 | 1 |
| Gpn2      | 0,718574 | 0,004037 | 0,208 | 0,218 | 1 |
| Ssr3      | 0,718645 | 0,009874 | 0,907 | 0,894 | 1 |
| Casp8     | 0,718788 | -0,00064 | 0,001 | 0,002 | 1 |
| Gm973     | 0,718788 | -0,00064 | 0,001 | 0,002 | 1 |
| Cntnap5a  | 0,718788 | -0,00064 | 0,001 | 0,002 | 1 |
| Celrr     | 0,718788 | -0,00064 | 0,001 | 0,002 | 1 |
| Dyrk3     | 0,718788 | -0,00064 | 0,001 | 0,002 | 1 |
| Rcsd1     | 0,718788 | -0,00064 | 0,001 | 0,002 | 1 |
| Fcgr3     | 0,718788 | -0,00064 | 0,001 | 0,002 | 1 |
| Ass1      | 0,718788 | -0,00064 | 0,001 | 0,002 | 1 |
| Sp5       | 0,718788 | -0,00064 | 0,001 | 0,002 | 1 |
| Spi1      | 0,718788 | -0,00064 | 0,001 | 0,002 | 1 |
| Rhov      | 0,718788 | -0,00064 | 0,001 | 0,002 | 1 |
| Syndig1   | 0,718788 | -0,00064 | 0,001 | 0,002 | 1 |
| Mmp24     | 0,718788 | -0,00064 | 0,001 | 0,002 | 1 |
| Kcns1     | 0,718788 | -0,00064 | 0,001 | 0,002 | 1 |
| Dok5      | 0,718788 | -0,00064 | 0,001 | 0,002 | 1 |
| Pnma3     | 0,718788 | -0,00064 | 0,001 | 0,002 | 1 |
| Tmem164   | 0,718788 | -0,00064 | 0,001 | 0,002 | 1 |
| Chrdl1    | 0,718788 | -0,00064 | 0,001 | 0,002 | 1 |
| Gm37350   | 0,718788 | -0,00064 | 0,001 | 0,002 | 1 |
| 9330121JC | 0,718788 | -0,00064 | 0,001 | 0,002 | 1 |
| Iqgap3    | 0,718788 | -0,00064 | 0,001 | 0,002 | 1 |
| Hmgcs2    | 0,718788 | -0,00064 | 0,001 | 0,002 | 1 |
| Bdh2      | 0,718788 | -0,00064 | 0,001 | 0,002 | 1 |
| Gem       | 0,718788 | -0,00064 | 0,001 | 0,002 | 1 |
| Mfap2     | 0,718788 | -0,00064 | 0,001 | 0,002 | 1 |
| Gm13052   | 0,718788 | -0,00064 | 0,001 | 0,002 | 1 |
| Pdpm      | 0,718788 | -0,00064 | 0,001 | 0,002 | 1 |
| 9630001P  | 0,718788 | -0,00064 | 0,001 | 0,002 | 1 |
| Sod3      | 0,718788 | -0,00064 | 0,001 | 0,002 | 1 |
| 8030423F2 | 0,718788 | -0,00064 | 0,001 | 0,002 | 1 |



|           |          |          |       |       |   |
|-----------|----------|----------|-------|-------|---|
| Antxr2    | 0,718788 | -0,00064 | 0,001 | 0,002 | 1 |
| Galnt9    | 0,718788 | -0,00064 | 0,001 | 0,002 | 1 |
| Cryba4    | 0,718788 | -0,00064 | 0,001 | 0,002 | 1 |
| Sez6l     | 0,718788 | -0,00064 | 0,001 | 0,002 | 1 |
| 5930412G  | 0,718788 | -0,00064 | 0,001 | 0,002 | 1 |
| Flt1      | 0,718788 | -0,00064 | 0,001 | 0,002 | 1 |
| 1700003E1 | 0,718788 | -0,00064 | 0,001 | 0,002 | 1 |
| Hrh1      | 0,718788 | -0,00064 | 0,001 | 0,002 | 1 |
| Cracr2a   | 0,718788 | -0,00064 | 0,001 | 0,002 | 1 |
| Pou2f2    | 0,718788 | -0,00064 | 0,001 | 0,002 | 1 |
| Sptbn4    | 0,718788 | -0,00064 | 0,001 | 0,002 | 1 |
| Hapln3    | 0,718788 | -0,00064 | 0,001 | 0,002 | 1 |
| P4ha3     | 0,718788 | -0,00064 | 0,001 | 0,002 | 1 |
| Hs3st4    | 0,718788 | -0,00064 | 0,001 | 0,002 | 1 |
| Il21r     | 0,718788 | -0,00064 | 0,001 | 0,002 | 1 |
| Fank1     | 0,718788 | -0,00064 | 0,001 | 0,002 | 1 |
| 6430531B  | 0,718788 | -0,00064 | 0,001 | 0,002 | 1 |
| Esr1      | 0,718788 | -0,00064 | 0,001 | 0,002 | 1 |
| E030030I0 | 0,718788 | -0,00064 | 0,001 | 0,002 | 1 |
| Hs3st5    | 0,718788 | -0,00064 | 0,001 | 0,002 | 1 |
| Vsir      | 0,718788 | -0,00064 | 0,001 | 0,002 | 1 |
| Gm867     | 0,718788 | -0,00064 | 0,001 | 0,002 | 1 |
| Plk5      | 0,718788 | -0,00064 | 0,001 | 0,002 | 1 |
| Nmrk2     | 0,718788 | -0,00064 | 0,001 | 0,002 | 1 |
| Myo1a     | 0,718788 | -0,00064 | 0,001 | 0,002 | 1 |
| Vegfc     | 0,718788 | -0,00064 | 0,001 | 0,002 | 1 |
| Cyp4f18   | 0,718788 | -0,00064 | 0,001 | 0,002 | 1 |
| Mast1     | 0,718788 | -0,00064 | 0,001 | 0,002 | 1 |
| Osgin1    | 0,718788 | -0,00064 | 0,001 | 0,002 | 1 |
| Dbn1d1    | 0,718788 | -0,00064 | 0,001 | 0,002 | 1 |
| Fam89a    | 0,718788 | -0,00064 | 0,001 | 0,002 | 1 |
| D830030K  | 0,718788 | -0,00064 | 0,001 | 0,002 | 1 |
| Gprin2    | 0,718788 | -0,00064 | 0,001 | 0,002 | 1 |
| A1593442  | 0,718788 | -0,00064 | 0,001 | 0,002 | 1 |
| Plscr1    | 0,718788 | -0,00064 | 0,001 | 0,002 | 1 |
| Nme9      | 0,718788 | -0,00064 | 0,001 | 0,002 | 1 |
| Sema3f    | 0,718788 | -0,00064 | 0,001 | 0,002 | 1 |
| Ttc21a    | 0,718788 | -0,00064 | 0,001 | 0,002 | 1 |
| Ikzf1     | 0,718788 | -0,00064 | 0,001 | 0,002 | 1 |
| Grb10     | 0,718788 | -0,00064 | 0,001 | 0,002 | 1 |
| Bcl11a    | 0,718788 | -0,00064 | 0,001 | 0,002 | 1 |
| Fbl1      | 0,718788 | -0,00064 | 0,001 | 0,002 | 1 |
| Slc22a4   | 0,718788 | -0,00064 | 0,001 | 0,002 | 1 |
| P4ha2     | 0,718788 | -0,00064 | 0,001 | 0,002 | 1 |
| Kcnab3    | 0,718788 | -0,00064 | 0,001 | 0,002 | 1 |
| Dnah2     | 0,718788 | -0,00064 | 0,001 | 0,002 | 1 |
| Bcl6b     | 0,718788 | -0,00064 | 0,001 | 0,002 | 1 |
| Ccl5      | 0,718788 | -0,00064 | 0,001 | 0,002 | 1 |
| Ccl9      | 0,718788 | -0,00064 | 0,001 | 0,002 | 1 |
| Top2a     | 0,718788 | -0,00064 | 0,001 | 0,002 | 1 |
| Tns4      | 0,718788 | -0,00064 | 0,001 | 0,002 | 1 |
| Pycr1     | 0,718788 | -0,00064 | 0,001 | 0,002 | 1 |

|           |          |          |       |       |   |
|-----------|----------|----------|-------|-------|---|
| Trpc7     | 0,718788 | -0,00064 | 0,001 | 0,002 | 1 |
| Atp6ap1l  | 0,718788 | -0,00064 | 0,001 | 0,002 | 1 |
| Bhmt      | 0,718788 | -0,00064 | 0,001 | 0,002 | 1 |
| Cd180     | 0,718788 | -0,00064 | 0,001 | 0,002 | 1 |
| Itga1     | 0,718788 | -0,00064 | 0,001 | 0,002 | 1 |
| Lrfr5     | 0,718788 | -0,00064 | 0,001 | 0,002 | 1 |
| Gpr135    | 0,718788 | -0,00064 | 0,001 | 0,002 | 1 |
| Ppp1r36   | 0,718788 | -0,00064 | 0,001 | 0,002 | 1 |
| Ccdc177   | 0,718788 | -0,00064 | 0,001 | 0,002 | 1 |
| Acot4     | 0,718788 | -0,00064 | 0,001 | 0,002 | 1 |
| 4732463B  | 0,718788 | -0,00064 | 0,001 | 0,002 | 1 |
| Syndig1l  | 0,718788 | -0,00064 | 0,001 | 0,002 | 1 |
| Gpr65     | 0,718788 | -0,00064 | 0,001 | 0,002 | 1 |
| Plcx3     | 0,718788 | -0,00064 | 0,001 | 0,002 | 1 |
| Csf2rb2   | 0,718788 | -0,00064 | 0,001 | 0,002 | 1 |
| Pnpla3    | 0,718788 | -0,00064 | 0,001 | 0,002 | 1 |
| Panx2     | 0,718788 | -0,00064 | 0,001 | 0,002 | 1 |
| Lrrk2     | 0,718788 | -0,00064 | 0,001 | 0,002 | 1 |
| Dhh       | 0,718788 | -0,00064 | 0,001 | 0,002 | 1 |
| Ece2      | 0,718788 | -0,00064 | 0,001 | 0,002 | 1 |
| Cd200r4   | 0,718788 | -0,00064 | 0,001 | 0,002 | 1 |
| Baiap3    | 0,718788 | -0,00064 | 0,001 | 0,002 | 1 |
| H2-Eb1    | 0,718788 | -0,00064 | 0,001 | 0,002 | 1 |
| Pcdhac2   | 0,718788 | -0,00064 | 0,001 | 0,002 | 1 |
| Npas4     | 0,718788 | -0,00064 | 0,001 | 0,002 | 1 |
| Prkg1     | 0,718788 | -0,00064 | 0,001 | 0,002 | 1 |
| Tctex1d4  | 0,718788 | -0,00129 | 0,001 | 0,002 | 1 |
| Rad51ap2  | 0,718788 | -0,00129 | 0,001 | 0,002 | 1 |
| Fam117a   | 0,718944 | 0,021857 | 0,122 | 0,117 | 1 |
| Eif4e     | 0,718981 | 0,02261  | 0,56  | 0,558 | 1 |
| 1110020A  | 0,719026 | 0,011386 | 0,056 | 0,052 | 1 |
| Fam78b    | 0,719119 | 0,003955 | 0,019 | 0,016 | 1 |
| Socs7     | 0,719165 | -0,00241 | 0,17  | 0,177 | 1 |
| Osbp      | 0,719417 | -0,01176 | 0,483 | 0,493 | 1 |
| Col3a1    | 0,719456 | 0,007169 | 0,001 | 0,002 | 1 |
| Mir670hg  | 0,719456 | 0,002293 | 0,001 | 0,002 | 1 |
| Lmo2      | 0,719456 | 0,002293 | 0,001 | 0,002 | 1 |
| Pde7b     | 0,719456 | 0,002293 | 0,001 | 0,002 | 1 |
| Lamb1     | 0,719456 | 0,002293 | 0,001 | 0,002 | 1 |
| Rai2      | 0,719456 | 0,000336 | 0,001 | 0,002 | 1 |
| 4930553P  | 0,719456 | 0,000336 | 0,001 | 0,002 | 1 |
| Mmp19     | 0,719456 | 0,000336 | 0,001 | 0,002 | 1 |
| Sgcd      | 0,719456 | 0,000336 | 0,001 | 0,002 | 1 |
| N4bp3     | 0,719456 | 0,000336 | 0,001 | 0,002 | 1 |
| Gm31946   | 0,719456 | 0,000336 | 0,001 | 0,002 | 1 |
| Ankrd34b  | 0,719456 | 0,000336 | 0,001 | 0,002 | 1 |
| Myo1f     | 0,719456 | 0,000336 | 0,001 | 0,002 | 1 |
| C230072F1 | 0,719456 | 0,000336 | 0,001 | 0,002 | 1 |
| Sptbn2    | 0,719456 | 0,000336 | 0,001 | 0,002 | 1 |
| Blnk      | 0,719456 | 0,000336 | 0,001 | 0,002 | 1 |
| Necab1    | 0,719456 | -0,00031 | 0,001 | 0,002 | 1 |
| Zfp968    | 0,719491 | -0,00286 | 0,04  | 0,044 | 1 |

|           |          |          |       |       |   |
|-----------|----------|----------|-------|-------|---|
| Wdr45b    | 0,719645 | 0,008647 | 0,589 | 0,579 | 1 |
| A930015Dl | 0,719685 | 0,002054 | 0,022 | 0,024 | 1 |
| Ecm1      | 0,719685 | 0,001098 | 0,022 | 0,024 | 1 |
| Zfp664    | 0,719833 | 0,017971 | 0,682 | 0,67  | 1 |
| Farsb     | 0,71984  | -0,01564 | 0,294 | 0,299 | 1 |
| Eif3g     | 0,719858 | 0,003881 | 0,761 | 0,78  | 1 |
| Kctd5     | 0,719972 | 0,014921 | 0,262 | 0,257 | 1 |
| Inpp1     | 0,720021 | 0,000207 | 0,208 | 0,216 | 1 |
| Fam71e1   | 0,720024 | 0,004026 | 0,058 | 0,054 | 1 |
| Prkar1a   | 0,720129 | -0,01337 | 0,974 | 0,972 | 1 |
| 2700046A  | 0,720195 | -0,02167 | 0,179 | 0,185 | 1 |
| Zbtb6     | 0,720291 | 0,001893 | 0,246 | 0,255 | 1 |
| Eif4e2    | 0,720403 | 0,024019 | 0,425 | 0,434 | 1 |
| Jmjd4     | 0,720417 | 0,003991 | 0,039 | 0,036 | 1 |
| Zfp235    | 0,7205   | -0,0055  | 0,1   | 0,094 | 1 |
| Gm16536   | 0,720689 | 0,006736 | 0,12  | 0,114 | 1 |
| Enox1     | 0,720782 | 0,001329 | 0,387 | 0,405 | 1 |
| Fxn       | 0,720938 | 0,014478 | 0,087 | 0,083 | 1 |
| Cltb      | 0,721211 | 0,023592 | 0,848 | 0,863 | 1 |
| Gm13031   | 0,721244 | 0,005871 | 0,019 | 0,016 | 1 |
| Focad     | 0,721295 | -0,00814 | 0,102 | 0,107 | 1 |
| Sh3bp5l   | 0,721307 | 0,004764 | 0,361 | 0,353 | 1 |
| Aprt      | 0,721319 | 0,005871 | 0,166 | 0,176 | 1 |
| Ranbp9    | 0,721422 | -0,00346 | 0,356 | 0,366 | 1 |
| Lrrc51    | 0,721575 | -0,00105 | 0,077 | 0,072 | 1 |
| Tmem65    | 0,721643 | 0,001102 | 0,509 | 0,496 | 1 |
| Gm37065   | 0,721773 | 0,003632 | 0,019 | 0,016 | 1 |
| Al182371  | 0,721773 | 0,003632 | 0,019 | 0,016 | 1 |
| Bbs9      | 0,721921 | -0,00249 | 0,113 | 0,119 | 1 |
| Gfpt1     | 0,721949 | -0,01431 | 0,399 | 0,41  | 1 |
| Creb5     | 0,721953 | -0,017   | 0,857 | 0,857 | 1 |
| Llgl1     | 0,722294 | 0,017629 | 0,714 | 0,737 | 1 |
| Mmp14     | 0,722531 | 0,014223 | 0,01  | 0,008 | 1 |
| Zscan20   | 0,722689 | 0,00076  | 0,075 | 0,08  | 1 |
| Zfp811    | 0,722879 | -0,0004  | 0,032 | 0,029 | 1 |
| Mta2      | 0,723009 | 0,017257 | 0,2   | 0,195 | 1 |
| Pus1      | 0,723019 | 0,005316 | 0,155 | 0,148 | 1 |
| Atg4d     | 0,72363  | -0,01124 | 0,386 | 0,393 | 1 |
| Zfp667    | 0,72376  | -0,00891 | 0,061 | 0,065 | 1 |
| Bambi     | 0,723838 | 0,007064 | 0,073 | 0,068 | 1 |
| Osbp2     | 0,723862 | 0,003458 | 0,326 | 0,343 | 1 |
| Zswim8    | 0,723902 | -0,02058 | 0,417 | 0,424 | 1 |
| Tdp1      | 0,724127 | 0,00305  | 0,135 | 0,143 | 1 |
| Ubox5     | 0,724145 | 0,002211 | 0,065 | 0,06  | 1 |
| Dzip1     | 0,724258 | 0,011992 | 0,106 | 0,101 | 1 |
| Gm26808   | 0,724259 | -0,00356 | 0,029 | 0,033 | 1 |
| Pcdhga4   | 0,724407 | 0,003964 | 0,022 | 0,024 | 1 |
| Dcdc2b    | 0,724416 | -0,00474 | 0,037 | 0,041 | 1 |
| Ppil4     | 0,724458 | 0,005871 | 0,393 | 0,405 | 1 |
| Ndufaf7   | 0,7247   | 0,017297 | 0,276 | 0,27  | 1 |
| Slc19a2   | 0,724874 | 0,009925 | 0,032 | 0,036 | 1 |
| Hmgn3     | 0,724924 | 0,003476 | 0,27  | 0,28  | 1 |

|           |          |          |       |       |   |
|-----------|----------|----------|-------|-------|---|
| Cherp     | 0,724989 | 0,023428 | 0,274 | 0,27  | 1 |
| 50334060  | 0,725032 | 0,003356 | 0,032 | 0,029 | 1 |
| Ccdc82    | 0,725304 | 0,024716 | 0,228 | 0,242 | 1 |
| Arl6      | 0,725326 | 0,002306 | 0,288 | 0,301 | 1 |
| Abl2      | 0,725351 | 0,02582  | 0,251 | 0,246 | 1 |
| Asph      | 0,725578 | 0,005292 | 0,107 | 0,114 | 1 |
| Rnf25     | 0,725607 | -0,00567 | 0,161 | 0,167 | 1 |
| Gm14399   | 0,725694 | 0,001768 | 0,032 | 0,029 | 1 |
| Elob      | 0,725744 | -0,00129 | 0,988 | 0,987 | 1 |
| Ccdc59    | 0,725898 | -0,00139 | 0,692 | 0,714 | 1 |
| Timm13    | 0,726144 | 0,001218 | 0,912 | 0,899 | 1 |
| Zfp385a   | 0,726214 | 0,00458  | 0,01  | 0,008 | 1 |
| Disp2     | 0,726214 | 0,006516 | 0,01  | 0,008 | 1 |
| Preb      | 0,726434 | -0,00253 | 0,402 | 0,413 | 1 |
| Trmt1     | 0,72645  | 0,011736 | 0,286 | 0,28  | 1 |
| Lipe      | 0,726503 | 0,020041 | 0,404 | 0,408 | 1 |
| Trub1     | 0,726677 | 0,004565 | 0,204 | 0,197 | 1 |
| Zfp949    | 0,726796 | -0,00517 | 0,2   | 0,208 | 1 |
| Wdsub1    | 0,727017 | -0,01255 | 0,215 | 0,221 | 1 |
| Wdr13     | 0,727042 | -0,01012 | 0,332 | 0,337 | 1 |
| Gga2      | 0,727053 | 0,008488 | 0,101 | 0,096 | 1 |
| Papd7     | 0,727181 | 0,005871 | 0,186 | 0,179 | 1 |
| Fbxo30    | 0,727255 | 0,008607 | 0,165 | 0,158 | 1 |
| Ccdc57    | 0,727273 | -0,00115 | 0,019 | 0,016 | 1 |
| Dld       | 0,727289 | 0,003569 | 0,487 | 0,472 | 1 |
| Tspan31   | 0,727372 | -0,02065 | 0,656 | 0,642 | 1 |
| Gm9903    | 0,727443 | 0,00458  | 0,01  | 0,008 | 1 |
| Mettl23   | 0,727448 | 0,015771 | 0,433 | 0,455 | 1 |
| Aip       | 0,727594 | 0,01022  | 0,587 | 0,567 | 1 |
| Ezh2      | 0,727932 | 0,001541 | 0,203 | 0,211 | 1 |
| Sertad3   | 0,728021 | 0,017928 | 0,139 | 0,135 | 1 |
| Nid1      | 0,728258 | -0,03726 | 0,208 | 0,197 | 1 |
| Dmxi2     | 0,728311 | 0,016381 | 0,231 | 0,226 | 1 |
| Psph      | 0,728518 | -0,01047 | 0,515 | 0,532 | 1 |
| Rsph3a    | 0,728606 | 0,003391 | 0,051 | 0,047 | 1 |
| Tnfrsf10b | 0,728673 | 0,00361  | 0,01  | 0,008 | 1 |
| Ccdc141   | 0,728673 | 0,00264  | 0,01  | 0,008 | 1 |
| Gm26690   | 0,728673 | 0,00264  | 0,01  | 0,008 | 1 |
| Slc18b1   | 0,728673 | 0,00264  | 0,01  | 0,008 | 1 |
| Fam196b   | 0,728673 | 0,00264  | 0,01  | 0,008 | 1 |
| Gm11491   | 0,728673 | 0,00264  | 0,01  | 0,008 | 1 |
| Gm47428   | 0,728673 | 0,00264  | 0,01  | 0,008 | 1 |
| Gm42715   | 0,728738 | 0,010744 | 0,061 | 0,057 | 1 |
| Ccdc90b   | 0,728771 | -0,00672 | 0,283 | 0,289 | 1 |
| Gnb2      | 0,728789 | 0,01164  | 0,982 | 0,992 | 1 |
| Eloa      | 0,728806 | -0,00822 | 0,3   | 0,307 | 1 |
| Ensa      | 0,728806 | 0,001834 | 0,595 | 0,616 | 1 |
| BC048403  | 0,728892 | 0,006796 | 0,056 | 0,052 | 1 |
| Dnm2      | 0,728947 | -0,00991 | 0,885 | 0,878 | 1 |
| Riok3     | 0,729101 | 0,015333 | 0,536 | 0,538 | 1 |
| Hdhd5     | 0,729137 | -0,01392 | 0,106 | 0,111 | 1 |
| lqck      | 0,729289 | 0,000442 | 0,019 | 0,021 | 1 |

|           |          |          |       |       |   |
|-----------|----------|----------|-------|-------|---|
| Mettl16   | 0,729356 | -0,0008  | 0,362 | 0,377 | 1 |
| Grpel2    | 0,729622 | -0,00967 | 0,279 | 0,285 | 1 |
| Phf2os1   | 0,729658 | 0,002968 | 0,01  | 0,008 | 1 |
| Egln3     | 0,729658 | 0,002968 | 0,01  | 0,008 | 1 |
| Fut8      | 0,729687 | 0,018412 | 0,619 | 0,613 | 1 |
| C330027C  | 0,729695 | -0,00659 | 0,016 | 0,018 | 1 |
| Zfp3      | 0,7297   | 0,000519 | 0,029 | 0,033 | 1 |
| Pus3      | 0,729751 | 0,010569 | 0,155 | 0,15  | 1 |
| Wdpcp     | 0,729768 | -0,0035  | 0,069 | 0,073 | 1 |
| Neu4      | 0,729903 | 0,001668 | 0,01  | 0,008 | 1 |
| Pelo      | 0,729903 | 0,001668 | 0,01  | 0,008 | 1 |
| Vmn2r124  | 0,729903 | 0,001668 | 0,01  | 0,008 | 1 |
| C2        | 0,729903 | 0,001668 | 0,01  | 0,008 | 1 |
| Lin9      | 0,729981 | -0,0004  | 0,029 | 0,033 | 1 |
| E130309D  | 0,729997 | -0,00334 | 0,146 | 0,153 | 1 |
| Cdk17     | 0,730164 | 0,033429 | 0,397 | 0,405 | 1 |
| Trnau1ap  | 0,730484 | 0,011906 | 0,288 | 0,281 | 1 |
| Tecr      | 0,730488 | 0,009453 | 0,997 | 0,995 | 1 |
| Mpv17l    | 0,730513 | 0,00539  | 0,27  | 0,281 | 1 |
| Dynlt1f   | 0,730566 | 0,006486 | 0,056 | 0,052 | 1 |
| 9030624JC | 0,730626 | 0,000994 | 0,551 | 0,553 | 1 |
| Cntlh     | 0,730667 | -0,00162 | 0,225 | 0,216 | 1 |
| L2hgdh    | 0,730693 | -0,00028 | 0,048 | 0,052 | 1 |
| Actn4     | 0,730784 | -0,00114 | 0,825 | 0,813 | 1 |
| Sarnp     | 0,730851 | -0,00876 | 0,605 | 0,623 | 1 |
| Cdr2l     | 0,731091 | 0,003382 | 0,438 | 0,457 | 1 |
| Gm12496   | 0,731135 | 0,001028 | 0,01  | 0,008 | 1 |
| 3110070M  | 0,731135 | 0,001028 | 0,01  | 0,008 | 1 |
| Ndufv2    | 0,731225 | 0,010658 | 0,808 | 0,829 | 1 |
| AC132444. | 0,731534 | -0,00693 | 0,016 | 0,018 | 1 |
| Al606181  | 0,731548 | -0,00339 | 0,113 | 0,119 | 1 |
| Alg1      | 0,731837 | -0,01085 | 0,264 | 0,27  | 1 |
| 4933428G  | 0,731899 | -0,0024  | 0,019 | 0,016 | 1 |
| Gm42595   | 0,732157 | -0,00043 | 0,029 | 0,033 | 1 |
| Gm5862    | 0,732367 | 5,69E-05 | 0,01  | 0,008 | 1 |
| Pcnx2     | 0,732369 | 0,00039  | 0,01  | 0,008 | 1 |
| 1700048O  | 0,732369 | 0,00039  | 0,01  | 0,008 | 1 |
| Gsr       | 0,73252  | -0,0091  | 0,403 | 0,411 | 1 |
| Dcp1a     | 0,732544 | -0,00467 | 0,237 | 0,246 | 1 |
| Rlf       | 0,732647 | -0,00105 | 0,394 | 0,408 | 1 |
| Bmpr1a    | 0,732778 | -0,00592 | 0,315 | 0,325 | 1 |
| Hnrnpu    | 0,732844 | 0,000957 | 0,977 | 0,98  | 1 |
| Nip7      | 0,732964 | 0,004878 | 0,27  | 0,262 | 1 |
| Ippk      | 0,732965 | -0,00281 | 0,427 | 0,434 | 1 |
| Cyb5d2    | 0,733115 | 0,003184 | 0,256 | 0,27  | 1 |
| Mtcp1     | 0,733298 | -0,00566 | 0,109 | 0,114 | 1 |
| Lpar6     | 0,733386 | -0,01332 | 0,129 | 0,133 | 1 |
| Nsmce4a   | 0,733513 | 0,009737 | 0,621 | 0,608 | 1 |
| Mark2     | 0,7336   | -0,01965 | 0,518 | 0,533 | 1 |
| Srp54a    | 0,733626 | 0,028496 | 0,32  | 0,315 | 1 |
| Gm16212   | 0,733701 | 0,002362 | 0,019 | 0,021 | 1 |
| Ptpa      | 0,733765 | -0,01598 | 0,679 | 0,676 | 1 |

|           |          |          |       |       |   |
|-----------|----------|----------|-------|-------|---|
| Slc27a1   | 0,733886 | 0,02562  | 0,451 | 0,447 | 1 |
| Arv1      | 0,734131 | 0,0003   | 0,048 | 0,052 | 1 |
| Rilpl1    | 0,734487 | 0,00209  | 0,391 | 0,407 | 1 |
| Hdac1     | 0,734599 | 0,016406 | 0,41  | 0,41  | 1 |
| Tedc2     | 0,734627 | -0,00178 | 0,056 | 0,06  | 1 |
| Maml1     | 0,734717 | -0,00353 | 0,126 | 0,132 | 1 |
| Pcdhga11  | 0,734723 | -0,01051 | 0,083 | 0,088 | 1 |
| Gprasp1   | 0,735397 | 0,001816 | 0,421 | 0,431 | 1 |
| Mapkap1   | 0,735512 | -0,00582 | 0,4   | 0,411 | 1 |
| Pfdn4     | 0,735597 | 0,020882 | 0,361 | 0,358 | 1 |
| Pdha1     | 0,735819 | 0,003178 | 0,57  | 0,561 | 1 |
| Gm14296   | 0,736044 | 0,005871 | 0,173 | 0,166 | 1 |
| Trappc6b  | 0,73621  | 0,013941 | 0,399 | 0,389 | 1 |
| Slc25a18  | 0,736517 | -0,00278 | 0,016 | 0,018 | 1 |
| Zfp879    | 0,736517 | -0,00278 | 0,016 | 0,018 | 1 |
| Mfsd2b    | 0,736517 | -0,00278 | 0,016 | 0,018 | 1 |
| Ctdsp2    | 0,736698 | -0,00342 | 0,648 | 0,655 | 1 |
| Marcks    | 0,736943 | 0,01269  | 0,029 | 0,033 | 1 |
| Tirap     | 0,736992 | 0,004651 | 0,254 | 0,247 | 1 |
| Mrps15    | 0,737099 | -0,00247 | 0,482 | 0,493 | 1 |
| Fam210a   | 0,737117 | -0,0028  | 0,238 | 0,249 | 1 |
| Nek7      | 0,737122 | -0,01549 | 0,566 | 0,569 | 1 |
| Rab18     | 0,737142 | 0,019152 | 0,839 | 0,854 | 1 |
| Tdg       | 0,737194 | 0,028278 | 0,263 | 0,262 | 1 |
| Anapc2    | 0,737619 | 0,026461 | 0,619 | 0,62  | 1 |
| D3Ert751  | 0,738209 | -0,00376 | 0,21  | 0,218 | 1 |
| Zfp324    | 0,738292 | -0,00585 | 0,05  | 0,054 | 1 |
| Tet3      | 0,738418 | 0,013944 | 0,494 | 0,506 | 1 |
| 1110008L1 | 0,738678 | -0,00189 | 0,045 | 0,049 | 1 |
| Kif9      | 0,738737 | -0,00085 | 0,016 | 0,018 | 1 |
| Gm26601   | 0,738749 | 0,003201 | 0,082 | 0,088 | 1 |
| Ydjc      | 0,73889  | 0,004009 | 0,049 | 0,046 | 1 |
| Bloc1s3   | 0,738906 | 0,006694 | 0,173 | 0,166 | 1 |
| Naa60     | 0,739091 | -0,01416 | 0,27  | 0,273 | 1 |
| Ikbkg     | 0,739161 | 0,00173  | 0,155 | 0,163 | 1 |
| Lurap1    | 0,739309 | -0,01617 | 0,271 | 0,276 | 1 |
| D230017M  | 0,739324 | -0,0038  | 0,034 | 0,037 | 1 |
| Ripor1    | 0,739407 | -0,0029  | 0,07  | 0,065 | 1 |
| Dnajc1    | 0,739437 | 0,004888 | 0,403 | 0,418 | 1 |
| Eya3      | 0,739506 | -0,0024  | 0,092 | 0,098 | 1 |
| Rbm45     | 0,739813 | -0,00029 | 0,136 | 0,143 | 1 |
| Gm48022   | 0,740033 | -0,00244 | 0,016 | 0,018 | 1 |
| Pip5k1c   | 0,740096 | 0,019329 | 0,103 | 0,099 | 1 |
| Phf10     | 0,740218 | 0,028425 | 0,425 | 0,424 | 1 |
| Ogfod1    | 0,740291 | 0,006975 | 0,153 | 0,161 | 1 |
| Slc7a14   | 0,740367 | 0,003368 | 0,037 | 0,034 | 1 |
| Cspg5     | 0,740476 | 0,00817  | 0,114 | 0,109 | 1 |
| Pik3r4    | 0,740699 | -0,00124 | 0,203 | 0,211 | 1 |
| 2700062C  | 0,740873 | 0,019034 | 0,262 | 0,259 | 1 |
| Taco1os   | 0,740891 | -0,0066  | 0,079 | 0,083 | 1 |
| Adam15    | 0,740909 | 0,0345   | 0,357 | 0,358 | 1 |
| Tmem109   | 0,741005 | 0,010672 | 0,473 | 0,489 | 1 |

|           |          |          |       |       |   |
|-----------|----------|----------|-------|-------|---|
| Sec14l5   | 0,741353 | 0,013565 | 0,758 | 0,769 | 1 |
| Rad17     | 0,741434 | 0,021404 | 0,299 | 0,317 | 1 |
| Milr1     | 0,741519 | 0,011186 | 0,03  | 0,028 | 1 |
| Mrpl30    | 0,741651 | 0,013608 | 0,666 | 0,672 | 1 |
| Gm28809   | 0,741785 | 0,011542 | 0,03  | 0,028 | 1 |
| Cryz      | 0,741806 | -0,00084 | 0,105 | 0,111 | 1 |
| Psmg1     | 0,741855 | 0,029536 | 0,225 | 0,223 | 1 |
| Dhfr      | 0,741923 | 0,002337 | 0,159 | 0,166 | 1 |
| 2210016Lz | 0,741929 | -0,00335 | 0,726 | 0,746 | 1 |
| Slc30a9   | 0,742042 | -0,0116  | 0,578 | 0,579 | 1 |
| Srprb     | 0,7421   | 0,010924 | 0,366 | 0,359 | 1 |
| Tle2      | 0,74238  | -0,00253 | 0,217 | 0,224 | 1 |
| Etaa1     | 0,742399 | 0,017598 | 0,183 | 0,177 | 1 |
| Gm14295   | 0,742723 | -0,00751 | 0,104 | 0,109 | 1 |
| G2e3      | 0,742937 | 0,012835 | 0,27  | 0,26  | 1 |
| Armcx5    | 0,74298  | 0,019543 | 0,21  | 0,205 | 1 |
| Tle1      | 0,743376 | 0,01861  | 0,53  | 0,553 | 1 |
| Fzd8      | 0,743578 | 0,015624 | 0,057 | 0,054 | 1 |
| 1700066B: | 0,743636 | 0,004909 | 0,017 | 0,015 | 1 |
| Nck2      | 0,743723 | 0,001482 | 0,248 | 0,259 | 1 |
| Acbd3     | 0,74402  | -0,01147 | 0,469 | 0,47  | 1 |
| Elp6      | 0,744266 | -0,00133 | 0,19  | 0,198 | 1 |
| Yeats4    | 0,74431  | 0,003164 | 0,25  | 0,26  | 1 |
| Plekhf2   | 0,744386 | 0,015669 | 0,057 | 0,054 | 1 |
| Slc30a7   | 0,744463 | 0,008039 | 0,166 | 0,174 | 1 |
| Tpk1      | 0,74461  | -0,00944 | 0,055 | 0,059 | 1 |
| Brwd1     | 0,744673 | 0,025935 | 0,515 | 0,515 | 1 |
| Pcsk1n    | 0,74476  | 0,029292 | 0,942 | 0,927 | 1 |
| Ceacam2   | 0,744911 | 0,003715 | 0,048 | 0,052 | 1 |
| Kctd13    | 0,744997 | 0,005585 | 0,979 | 0,982 | 1 |
| Nsmaf     | 0,745092 | 0,022732 | 0,179 | 0,189 | 1 |
| Opa3      | 0,745148 | 0,004545 | 0,328 | 0,34  | 1 |
| Zfp418    | 0,745231 | 0,006792 | 0,054 | 0,05  | 1 |
| Zfp868    | 0,745403 | 0,015072 | 0,151 | 0,146 | 1 |
| Psmd14    | 0,745502 | 0,020742 | 0,548 | 0,55  | 1 |
| Fam103a1  | 0,74588  | -0,00911 | 0,341 | 0,341 | 1 |
| Htatsf1   | 0,745949 | 0,018971 | 0,484 | 0,485 | 1 |
| Polrmt    | 0,746176 | -0,01232 | 0,143 | 0,148 | 1 |
| Diaph1    | 0,746184 | -0,00279 | 0,191 | 0,198 | 1 |
| Lrmda     | 0,746277 | 0,007091 | 0,066 | 0,062 | 1 |
| Trmo      | 0,746673 | -0,00676 | 0,076 | 0,08  | 1 |
| BC005537  | 0,746828 | 0,017375 | 0,836 | 0,833 | 1 |
| Ube3a     | 0,746831 | 0,0159   | 0,893 | 0,911 | 1 |
| G3bp1     | 0,746928 | 0,005715 | 0,621 | 0,649 | 1 |
| Gm37027   | 0,747035 | 0,002982 | 0,017 | 0,015 | 1 |
| Slc10a7   | 0,747087 | 0,01058  | 0,229 | 0,223 | 1 |
| Fam91a1   | 0,747205 | 0,012857 | 0,405 | 0,397 | 1 |
| Pomp      | 0,747287 | -0,01652 | 0,907 | 0,912 | 1 |
| Zfp512    | 0,747533 | 0,004372 | 0,383 | 0,379 | 1 |
| Oat       | 0,747555 | 1,06E-05 | 0,544 | 0,525 | 1 |
| Creb3     | 0,747559 | 0,022922 | 0,406 | 0,408 | 1 |
| Kctd11    | 0,74756  | 0,017766 | 0,132 | 0,128 | 1 |

|           |          |          |       |       |   |
|-----------|----------|----------|-------|-------|---|
| Zfp112    | 0,747569 | -0,0044  | 0,094 | 0,099 | 1 |
| Thbs2     | 0,747615 | 0,006171 | 0,066 | 0,062 | 1 |
| Trip6     | 0,74767  | 0,006501 | 0,03  | 0,028 | 1 |
| Hs1bp3    | 0,747736 | 0,010616 | 0,237 | 0,246 | 1 |
| Mex3a     | 0,747797 | 0,001424 | 0,017 | 0,015 | 1 |
| Eif3m     | 0,747902 | 0,015105 | 0,726 | 0,743 | 1 |
| Exosc3    | 0,747972 | -0,00372 | 0,164 | 0,171 | 1 |
| Shf       | 0,748022 | 0,00707  | 0,082 | 0,078 | 1 |
| Zfp449    | 0,748124 | 0,004974 | 0,082 | 0,078 | 1 |
| Btbd10    | 0,748219 | 0,00205  | 0,292 | 0,283 | 1 |
| Ctnn      | 0,748299 | -0,00787 | 0,433 | 0,447 | 1 |
| Gm26508   | 0,74831  | 0,005553 | 0,024 | 0,021 | 1 |
| Rps6ka2   | 0,74838  | 0,013714 | 0,179 | 0,189 | 1 |
| Dynlt1c   | 0,748463 | -0,00312 | 0,013 | 0,015 | 1 |
| H2-DMa    | 0,74855  | 0,002345 | 0,017 | 0,015 | 1 |
| Mrps25    | 0,748648 | -0,00737 | 0,484 | 0,494 | 1 |
| Gtpbp1    | 0,748696 | -0,00362 | 0,112 | 0,117 | 1 |
| Taf2      | 0,748724 | 0,014099 | 0,263 | 0,257 | 1 |
| Sult5a1   | 0,748884 | 0,00305  | 0,026 | 0,029 | 1 |
| Ofd1      | 0,749062 | -0,01075 | 0,151 | 0,156 | 1 |
| Zbtb22    | 0,749084 | 0,010603 | 0,208 | 0,218 | 1 |
| Cbx7      | 0,749221 | -0,00127 | 0,278 | 0,286 | 1 |
| Gm17949   | 0,749284 | -0,00248 | 0,013 | 0,015 | 1 |
| B230312C  | 0,749284 | -0,00437 | 0,013 | 0,015 | 1 |
| H2afy     | 0,749284 | 0,004189 | 0,613 | 0,637 | 1 |
| Tenm2     | 0,749533 | -0,01264 | 0,113 | 0,117 | 1 |
| Capza2    | 0,750006 | 0,015526 | 0,852 | 0,876 | 1 |
| Zeb1      | 0,750066 | 0,00332  | 0,017 | 0,015 | 1 |
| Pcgf3     | 0,750147 | 0,017527 | 0,323 | 0,317 | 1 |
| Zfp111    | 0,750181 | 0,009101 | 0,102 | 0,098 | 1 |
| Cmas      | 0,750354 | 0,014983 | 0,328 | 0,324 | 1 |
| Gpr85     | 0,750375 | 0,001555 | 0,178 | 0,185 | 1 |
| Atpaf1    | 0,750586 | 0,011339 | 0,294 | 0,288 | 1 |
| Slc25a39  | 0,750592 | 0,000176 | 0,387 | 0,397 | 1 |
| Pcdhb17   | 0,750894 | -0,00185 | 0,121 | 0,127 | 1 |
| Rnf208    | 0,750981 | 0,016373 | 0,405 | 0,42  | 1 |
| Ndufv1    | 0,751081 | 0,008133 | 0,811 | 0,802 | 1 |
| 1600002K  | 0,751584 | 0,006164 | 0,104 | 0,099 | 1 |
| Memo1     | 0,751735 | -0,00693 | 0,162 | 0,167 | 1 |
| Gm7160    | 0,75177  | 0,000746 | 0,017 | 0,015 | 1 |
| Cdkn2aip  | 0,751819 | 0,018764 | 0,24  | 0,234 | 1 |
| Uchl1     | 0,75182  | -0,07856 | 0,355 | 0,354 | 1 |
| Ttpal     | 0,752002 | 0,001104 | 0,139 | 0,133 | 1 |
| 9530034E1 | 0,752148 | 0,001209 | 0,045 | 0,049 | 1 |
| Tmub1     | 0,752375 | -0,01035 | 0,261 | 0,267 | 1 |
| Tmem120k  | 0,752535 | 0,004189 | 0,143 | 0,15  | 1 |
| Polr2l    | 0,752661 | 0,006872 | 0,424 | 0,436 | 1 |
| Zdhhc15   | 0,752715 | 0,004622 | 0,042 | 0,039 | 1 |
| Chmp1a    | 0,752726 | 0,001595 | 0,563 | 0,541 | 1 |
| Cmtr1     | 0,752881 | 0,001133 | 0,091 | 0,086 | 1 |
| Arhgef10  | 0,752911 | 0,015469 | 0,957 | 0,959 | 1 |
| Carf      | 0,752937 | 0,00639  | 0,189 | 0,198 | 1 |



|            |          |          |       |       |   |
|------------|----------|----------|-------|-------|---|
| Map3k2     | 0,752946 | -4,1E-05 | 0,369 | 0,359 | 1 |
| Gm21680    | 0,752992 | -0,0004  | 0,034 | 0,037 | 1 |
| Ptrhd1     | 0,753381 | 0,02199  | 0,253 | 0,25  | 1 |
| Rarg       | 0,753399 | 0,002345 | 0,013 | 0,015 | 1 |
| Rin1       | 0,753809 | 0,001052 | 0,013 | 0,015 | 1 |
| Ppm1f      | 0,75404  | -0,02253 | 0,223 | 0,228 | 1 |
| Atp5g2     | 0,754189 | -0,00369 | 0,967 | 0,964 | 1 |
| Zcchc6     | 0,75433  | -0,01225 | 0,531 | 0,532 | 1 |
| Ubxn11     | 0,754365 | 0,000468 | 0,024 | 0,021 | 1 |
| Rfx4       | 0,754405 | 0,004254 | 0,008 | 0,007 | 1 |
| Slc35g1    | 0,754405 | 0,004254 | 0,008 | 0,007 | 1 |
| Gm3604     | 0,754684 | -0,00049 | 0,024 | 0,021 | 1 |
| Pcdhb9     | 0,754827 | 0,009944 | 0,026 | 0,029 | 1 |
| Nup153     | 0,754854 | -0,00618 | 0,257 | 0,263 | 1 |
| 1810044Dl  | 0,754921 | 0,002872 | 0,079 | 0,085 | 1 |
| Sptlc1     | 0,754951 | 0,020642 | 0,455 | 0,459 | 1 |
| 2900026A   | 0,7551   | -0,0027  | 0,024 | 0,026 | 1 |
| Tbc1d7     | 0,755306 | 0,023286 | 0,348 | 0,348 | 1 |
| Spp2       | 0,755517 | 0,003283 | 0,008 | 0,007 | 1 |
| Gm30606    | 0,755517 | 0,003283 | 0,008 | 0,007 | 1 |
| Rapgef3os2 | 0,755517 | 0,003283 | 0,008 | 0,007 | 1 |
| Gm16350    | 0,755517 | 0,004254 | 0,008 | 0,007 | 1 |
| H2afx      | 0,755528 | -0,00309 | 0,237 | 0,247 | 1 |
| Tfb2m      | 0,755547 | 0,008758 | 0,199 | 0,197 | 1 |
| Emp2       | 0,755634 | 0,010644 | 0,016 | 0,018 | 1 |
| Hoxd1      | 0,75565  | -0,01316 | 0,146 | 0,151 | 1 |
| A830009L   | 0,755664 | 0,001052 | 0,013 | 0,015 | 1 |
| Mtch2      | 0,755741 | 0,009378 | 0,703 | 0,701 | 1 |
| Ttc30b     | 0,755743 | -0,00777 | 0,106 | 0,111 | 1 |
| 4833413G   | 0,755769 | -0,00066 | 0,042 | 0,046 | 1 |
| Herc1      | 0,755916 | 0,03037  | 0,509 | 0,514 | 1 |
| Dll1       | 0,755974 | 0,024597 | 0,059 | 0,055 | 1 |
| Neat1      | 0,756032 | 0,03065  | 0,994 | 0,995 | 1 |
| Pde12      | 0,756124 | -0,00402 | 0,181 | 0,174 | 1 |
| Nrde2      | 0,756349 | -0,00365 | 0,165 | 0,171 | 1 |
| Mblac1     | 0,756439 | 0,00014  | 0,024 | 0,021 | 1 |
| Zbtb34     | 0,756556 | 0,005257 | 0,059 | 0,055 | 1 |
| Stk25      | 0,756623 | 0,015305 | 0,502 | 0,506 | 1 |
| Fam83f     | 0,75663  | 0,004254 | 0,008 | 0,007 | 1 |
| Gm38250    | 0,75663  | 0,003283 | 0,008 | 0,007 | 1 |
| Gm4950     | 0,75663  | 0,003283 | 0,008 | 0,007 | 1 |
| Efhc1      | 0,75663  | 0,00231  | 0,008 | 0,007 | 1 |
| Fam221a    | 0,75663  | 0,00231  | 0,008 | 0,007 | 1 |
| Tmem95     | 0,75663  | 0,00231  | 0,008 | 0,007 | 1 |
| Med10      | 0,756633 | 0,002994 | 0,37  | 0,379 | 1 |
| Mrpl16     | 0,75674  | 0,009587 | 0,201 | 0,195 | 1 |
| Rsrc2      | 0,756863 | 0,007386 | 0,888 | 0,909 | 1 |
| Gm16894    | 0,756868 | 0,004927 | 0,035 | 0,033 | 1 |
| Gm15594    | 0,756878 | 0,007704 | 0,059 | 0,055 | 1 |
| Ppp3cb     | 0,756979 | 0,035215 | 0,426 | 0,436 | 1 |
| Galc       | 0,756997 | 0,020173 | 0,475 | 0,47  | 1 |
| Atraid     | 0,757129 | 0,017358 | 0,889 | 0,883 | 1 |

|          |          |          |       |       |   |
|----------|----------|----------|-------|-------|---|
| Kiz      | 0,757136 | -0,02485 | 0,244 | 0,246 | 1 |
| Ufl1     | 0,75744  | 0,004644 | 0,523 | 0,515 | 1 |
| Pim1     | 0,757545 | 0,01015  | 0,042 | 0,046 | 1 |
| Ssbp2    | 0,757676 | 0,016145 | 0,231 | 0,242 | 1 |
| Spata18  | 0,757743 | 0,001337 | 0,008 | 0,007 | 1 |
| Dao      | 0,757743 | 0,001337 | 0,008 | 0,007 | 1 |
| Gm43154  | 0,757743 | 0,001337 | 0,008 | 0,007 | 1 |
| Thy1     | 0,757743 | 0,001337 | 0,008 | 0,007 | 1 |
| Srl      | 0,757743 | 0,001337 | 0,008 | 0,007 | 1 |
| 4930461C | 0,757743 | 0,001337 | 0,008 | 0,007 | 1 |
| 9330136K | 0,757743 | 0,001337 | 0,008 | 0,007 | 1 |
| Gm26901  | 0,757998 | -0,00156 | 0,042 | 0,046 | 1 |
| Washc5   | 0,758032 | -0,02287 | 0,259 | 0,262 | 1 |
| B230311B | 0,758198 | -0,00049 | 0,024 | 0,021 | 1 |
| Wiz      | 0,758302 | -0,00044 | 0,332 | 0,341 | 1 |
| Rbfox2   | 0,758306 | 0,011537 | 0,122 | 0,128 | 1 |
| Rad9a    | 0,758531 | 0,01055  | 0,162 | 0,158 | 1 |
| Cul5     | 0,758642 | 0,011749 | 0,637 | 0,631 | 1 |
| Gm27003  | 0,758857 | 0,000696 | 0,008 | 0,007 | 1 |
| Ccne2    | 0,758857 | 0,000696 | 0,008 | 0,007 | 1 |
| Elavl4   | 0,759136 | -0,00092 | 0,008 | 0,007 | 1 |
| Osmr     | 0,759136 | -0,00092 | 0,008 | 0,007 | 1 |
| Senp8    | 0,759307 | -0,00379 | 0,197 | 0,205 | 1 |
| Hexb     | 0,75935  | 0,01996  | 0,343 | 0,343 | 1 |
| Nudcd2   | 0,759407 | -0,00724 | 0,352 | 0,364 | 1 |
| Pappa    | 0,759415 | 0,001999 | 0,008 | 0,007 | 1 |
| Agtbp1   | 0,759434 | -0,01635 | 0,521 | 0,525 | 1 |
| Sp4      | 0,759662 | -0,00861 | 0,328 | 0,333 | 1 |
| Mex3c    | 0,759856 | 0,022259 | 0,388 | 0,387 | 1 |
| Scfd2    | 0,759879 | -0,00268 | 0,155 | 0,161 | 1 |
| Gm32250  | 0,759971 | -0,00028 | 0,008 | 0,007 | 1 |
| Nkain4   | 0,759971 | -0,00028 | 0,008 | 0,007 | 1 |
| Gm20707  | 0,759971 | -0,00028 | 0,008 | 0,007 | 1 |
| Kcnj13   | 0,760045 | -0,00476 | 0,01  | 0,011 | 1 |
| Nelfa    | 0,760078 | -0,00823 | 0,187 | 0,193 | 1 |
| Prpf40a  | 0,760236 | 0,00639  | 0,729 | 0,715 | 1 |
| Lamc1    | 0,760569 | 0,014865 | 0,419 | 0,413 | 1 |
| Aes      | 0,760575 | 0,013742 | 0,989 | 0,993 | 1 |
| Ola1     | 0,760687 | 0,021272 | 0,46  | 0,473 | 1 |
| Wisp1    | 0,760764 | -0,00254 | 0,039 | 0,042 | 1 |
| Ndufb4   | 0,760898 | 0,002228 | 0,888 | 0,893 | 1 |
| Nalcn    | 0,760909 | -0,00123 | 0,078 | 0,073 | 1 |
| Prmt9    | 0,760971 | -0,00239 | 0,15  | 0,156 | 1 |
| Hilpda   | 0,761017 | -0,00858 | 0,073 | 0,076 | 1 |
| Adam28   | 0,761253 | -0,00016 | 0,024 | 0,026 | 1 |
| Plxnd1   | 0,761365 | -0,00252 | 0,008 | 0,007 | 1 |
| Ganc     | 0,761379 | -0,00299 | 0,265 | 0,27  | 1 |
| Haus6    | 0,761427 | 0,009678 | 0,168 | 0,163 | 1 |
| Fam114a2 | 0,76144  | -0,00156 | 0,479 | 0,463 | 1 |
| Tshz2    | 0,761453 | -0,00539 | 0,01  | 0,011 | 1 |
| Gm48796  | 0,761454 | -0,00088 | 0,01  | 0,011 | 1 |
| Cetn4    | 0,761688 | -0,00219 | 0,01  | 0,011 | 1 |

|           |          |          |       |       |   |
|-----------|----------|----------|-------|-------|---|
| Mkx       | 0,761688 | -0,00219 | 0,01  | 0,011 | 1 |
| Pde4a     | 0,761795 | 0,010598 | 0,237 | 0,229 | 1 |
| Ccdc39    | 0,7618   | 0,002626 | 0,086 | 0,091 | 1 |
| Brox      | 0,761855 | -0,00421 | 0,468 | 0,478 | 1 |
| Dcps      | 0,761882 | -0,009   | 0,566 | 0,572 | 1 |
| Sdccag8   | 0,762036 | 0,007669 | 0,227 | 0,223 | 1 |
| Bicdl1    | 0,762093 | 0,003037 | 0,035 | 0,033 | 1 |
| Gm26674   | 0,76239  | -0,00155 | 0,01  | 0,011 | 1 |
| Med9os    | 0,76239  | -0,00155 | 0,01  | 0,011 | 1 |
| Pik3r5    | 0,76239  | -0,00155 | 0,01  | 0,011 | 1 |
| Tlcd2     | 0,76239  | -0,00155 | 0,01  | 0,011 | 1 |
| Mkxn1     | 0,76241  | 5,69E-05 | 0,786 | 0,798 | 1 |
| Ankle2    | 0,76248  | 0,003315 | 0,312 | 0,319 | 1 |
| Zfp354b   | 0,762773 | 0,004009 | 0,042 | 0,046 | 1 |
| Igfbpl1   | 0,763318 | -0,03747 | 0,008 | 0,007 | 1 |
| AC161165. | 0,763331 | -0,00122 | 0,01  | 0,011 | 1 |
| Ankrd27   | 0,763475 | 0,009558 | 0,193 | 0,202 | 1 |
| Otud7a    | 0,763476 | -0,00108 | 0,184 | 0,19  | 1 |
| Atp6v1g2  | 0,763826 | -0,00111 | 0,063 | 0,067 | 1 |
| Incenp    | 0,76393  | 0,004343 | 0,059 | 0,055 | 1 |
| Msi1      | 0,764034 | -0,00058 | 0,01  | 0,011 | 1 |
| Prpf38a   | 0,764102 | 0,005637 | 0,312 | 0,324 | 1 |
| Camsap2   | 0,764137 | 0,02833  | 0,397 | 0,4   | 1 |
| Lhpp      | 0,764221 | 0,002611 | 0,089 | 0,094 | 1 |
| Fxr1      | 0,764245 | -0,00944 | 0,89  | 0,889 | 1 |
| Lysmd1    | 0,764304 | -0,00052 | 0,235 | 0,226 | 1 |
| Taok1     | 0,765031 | 0,001668 | 0,871 | 0,891 | 1 |
| Zfp512b   | 0,765111 | 0,006154 | 0,131 | 0,125 | 1 |
| Pop7      | 0,765225 | 0,010528 | 0,277 | 0,272 | 1 |
| Golga7    | 0,765286 | 0,000102 | 0,969 | 0,976 | 1 |
| Ppat      | 0,765504 | 0,013585 | 0,194 | 0,19  | 1 |
| Cc2d1b    | 0,765549 | -0,00554 | 0,366 | 0,377 | 1 |
| Gm4793    | 0,765568 | 0,004285 | 0,028 | 0,026 | 1 |
| Nuak1     | 0,765672 | 0,035182 | 0,452 | 0,457 | 1 |
| Clrn1     | 0,765679 | 0,00039  | 0,01  | 0,011 | 1 |
| Ssc4d     | 0,765679 | 0,00039  | 0,01  | 0,011 | 1 |
| Tigd3     | 0,765679 | 0,00039  | 0,01  | 0,011 | 1 |
| Trmt12    | 0,765935 | 0,000192 | 0,076 | 0,08  | 1 |
| Cct4      | 0,766022 | 0,025904 | 0,759 | 0,797 | 1 |
| Tor3a     | 0,766208 | -0,00432 | 0,021 | 0,023 | 1 |
| Dna2      | 0,766208 | -0,00432 | 0,021 | 0,023 | 1 |
| Tspan5    | 0,766368 | 0,00306  | 0,779 | 0,784 | 1 |
| Nudcd3    | 0,766411 | 0,0224   | 0,698 | 0,691 | 1 |
| Gpatch2   | 0,766869 | 0,031545 | 0,324 | 0,327 | 1 |
| Ccnd1     | 0,766942 | 0,042197 | 0,057 | 0,06  | 1 |
| Mknk2     | 0,767013 | 0,001947 | 0,141 | 0,135 | 1 |
| Zcchc2    | 0,767046 | 0,013939 | 0,153 | 0,15  | 1 |
| Npdc1     | 0,767259 | 0,016642 | 0,818 | 0,829 | 1 |
| AW549877  | 0,76752  | 0,032868 | 0,63  | 0,639 | 1 |
| Tnfrsf1a  | 0,767698 | 0,010986 | 0,095 | 0,091 | 1 |
| Ldlrad3   | 0,768108 | -0,00848 | 0,54  | 0,553 | 1 |
| Mlh1      | 0,768127 | -0,0064  | 0,159 | 0,164 | 1 |

|           |          |          |       |       |   |
|-----------|----------|----------|-------|-------|---|
| Pdcd2     | 0,768241 | -0,00376 | 0,236 | 0,241 | 1 |
| Setd3     | 0,768268 | -0,00054 | 0,766 | 0,798 | 1 |
| S1pr2     | 0,768314 | -0,00495 | 0,073 | 0,076 | 1 |
| Rdh11     | 0,768488 | 0,007899 | 0,419 | 0,411 | 1 |
| Gm10037   | 0,768516 | -0,00336 | 0,021 | 0,023 | 1 |
| Nrcam     | 0,768772 | 0,001252 | 0,039 | 0,042 | 1 |
| Tonsl     | 0,768846 | -0,00145 | 0,021 | 0,023 | 1 |
| Slc25a15  | 0,769293 | 0,008476 | 0,115 | 0,111 | 1 |
| Snn       | 0,769298 | -0,00761 | 0,294 | 0,298 | 1 |
| Fggy      | 0,769393 | 0,007979 | 0,195 | 0,19  | 1 |
| Zfp300    | 0,76948  | 0,009234 | 0,05  | 0,054 | 1 |
| Pcdh20    | 0,769558 | 0,012673 | 0,072 | 0,068 | 1 |
| Egf       | 0,769745 | 0,010905 | 0,024 | 0,026 | 1 |
| Smndc1    | 0,769919 | 0,005195 | 0,553 | 0,572 | 1 |
| Zfp407    | 0,769929 | -0,01663 | 0,178 | 0,182 | 1 |
| Gm26829   | 0,770022 | -0,0051  | 0,007 | 0,008 | 1 |
| Pdcd2l    | 0,770291 | -0,00974 | 0,186 | 0,192 | 1 |
| Lipo3     | 0,770352 | -0,00634 | 0,057 | 0,06  | 1 |
| Slc4a3    | 0,770575 | -0,00563 | 0,039 | 0,042 | 1 |
| Med17     | 0,770589 | -0,00293 | 0,302 | 0,311 | 1 |
| Isy1      | 0,770605 | 0,010858 | 0,205 | 0,2   | 1 |
| Ino80dos  | 0,770624 | 0,00188  | 0,122 | 0,127 | 1 |
| BC002059  | 0,770649 | 0,008511 | 0,097 | 0,093 | 1 |
| Slc11a1   | 0,770861 | -0,00286 | 0,007 | 0,008 | 1 |
| Stmn2     | 0,770861 | -0,00286 | 0,007 | 0,008 | 1 |
| Tekt2     | 0,770861 | -0,00286 | 0,007 | 0,008 | 1 |
| Trhde     | 0,770861 | -0,00286 | 0,007 | 0,008 | 1 |
| AC140186  | 0,770861 | -0,00447 | 0,007 | 0,008 | 1 |
| 3222401L1 | 0,770941 | -0,00503 | 0,299 | 0,311 | 1 |
| Ngdn      | 0,770946 | 0,016023 | 0,439 | 0,434 | 1 |
| Dlg2      | 0,771028 | 0,021279 | 0,405 | 0,403 | 1 |
| Smg6      | 0,771523 | 0,045297 | 0,37  | 0,377 | 1 |
| 1110034G  | 0,771936 | 0,004058 | 0,221 | 0,213 | 1 |
| AV099323  | 0,772132 | 0,001748 | 0,028 | 0,026 | 1 |
| Fxyd5     | 0,772261 | -0,00189 | 0,007 | 0,008 | 1 |
| A730098A  | 0,772261 | -0,00189 | 0,007 | 0,008 | 1 |
| Htra3     | 0,772493 | -0,00629 | 0,19  | 0,197 | 1 |
| Twnk      | 0,772615 | -0,00548 | 0,163 | 0,169 | 1 |
| Rrp8      | 0,772619 | -0,00179 | 0,181 | 0,187 | 1 |
| St7l      | 0,772642 | -0,01123 | 0,588 | 0,572 | 1 |
| Rasa1     | 0,772696 | 0,000746 | 0,374 | 0,361 | 1 |
| Fv1       | 0,77282  | -0,00125 | 0,007 | 0,008 | 1 |
| Lmntd1    | 0,77282  | -0,00125 | 0,007 | 0,008 | 1 |
| A330041J2 | 0,77282  | -0,00125 | 0,007 | 0,008 | 1 |
| Dnah17    | 0,77282  | -0,00125 | 0,007 | 0,008 | 1 |
| D630036H  | 0,77282  | -0,00125 | 0,007 | 0,008 | 1 |
| A930007I1 | 0,77282  | -0,00125 | 0,007 | 0,008 | 1 |
| Nfkb1     | 0,772891 | -0,00441 | 0,208 | 0,213 | 1 |
| Cyp3a13   | 0,773362 | 0,004404 | 0,095 | 0,091 | 1 |
| Ppip5k1   | 0,7736   | 0,000497 | 0,243 | 0,254 | 1 |
| Meis1     | 0,773607 | 0,013712 | 0,363 | 0,359 | 1 |
| Clstn2    | 0,773661 | -0,00092 | 0,007 | 0,008 | 1 |

|           |          |          |       |       |   |
|-----------|----------|----------|-------|-------|---|
| Itga9     | 0,773661 | -0,00092 | 0,007 | 0,008 | 1 |
| Angpt1    | 0,773661 | -0,00092 | 0,007 | 0,008 | 1 |
| Gm20463   | 0,773661 | -0,00092 | 0,007 | 0,008 | 1 |
| Nmrk1     | 0,773766 | 0,012669 | 0,171 | 0,167 | 1 |
| Hmgn1     | 0,773889 | -0,00423 | 0,579 | 0,593 | 1 |
| Neurl4    | 0,773915 | 0,007776 | 0,281 | 0,289 | 1 |
| Gprasp2   | 0,773978 | -0,00092 | 0,047 | 0,044 | 1 |
| Gm26840   | 0,774009 | 0,002054 | 0,022 | 0,02  | 1 |
| H2afj     | 0,774056 | -0,00333 | 0,954 | 0,979 | 1 |
| Gm17555   | 0,774115 | -0,00257 | 0,004 | 0,005 | 1 |
| Zmiz1os1  | 0,774115 | -0,00257 | 0,004 | 0,005 | 1 |
| Mmrn2     | 0,774115 | -0,00257 | 0,004 | 0,005 | 1 |
| Haus4     | 0,774115 | -0,00257 | 0,004 | 0,005 | 1 |
| Aifm3     | 0,774115 | -0,00257 | 0,004 | 0,005 | 1 |
| AC120150. | 0,774115 | -0,00257 | 0,004 | 0,005 | 1 |
| Slc3a1    | 0,774115 | -0,00257 | 0,004 | 0,005 | 1 |
| Axl       | 0,774115 | -0,00418 | 0,004 | 0,005 | 1 |
| Pitpnm2   | 0,774221 | 0,000696 | 0,007 | 0,008 | 1 |
| Ackr1     | 0,774221 | -0,00028 | 0,007 | 0,008 | 1 |
| Pidd1     | 0,774221 | -0,00028 | 0,007 | 0,008 | 1 |
| Myh3      | 0,774221 | -0,00028 | 0,007 | 0,008 | 1 |
| Gm20522   | 0,774221 | -0,00028 | 0,007 | 0,008 | 1 |
| Fam160a2  | 0,774257 | -0,00533 | 0,16  | 0,166 | 1 |
| Nadk      | 0,77437  | -0,01338 | 0,366 | 0,371 | 1 |
| Tomm40l   | 0,774389 | 0,005101 | 0,229 | 0,237 | 1 |
| Spred3    | 0,774458 | 0,001098 | 0,021 | 0,023 | 1 |
| Fancb     | 0,774569 | 0,002655 | 0,015 | 0,013 | 1 |
| Gm26590   | 0,774569 | 0,002655 | 0,015 | 0,013 | 1 |
| Top3a     | 0,774601 | 0,001863 | 0,052 | 0,049 | 1 |
| Rftn1     | 0,774624 | 0,007371 | 0,677 | 0,689 | 1 |
| Kcnh2     | 0,775181 | 0,002686 | 0,022 | 0,02  | 1 |
| Stap1     | 0,775214 | -0,00159 | 0,004 | 0,005 | 1 |
| Chtf8     | 0,775303 | -0,00054 | 0,262 | 0,27  | 1 |
| Cdh13     | 0,775343 | 0,008436 | 0,007 | 0,008 | 1 |
| Hap1      | 0,77544  | -0,00295 | 0,028 | 0,031 | 1 |
| Arpc1a    | 0,775448 | -0,00679 | 0,979 | 0,984 | 1 |
| Znhit1    | 0,775554 | -0,01074 | 0,652 | 0,659 | 1 |
| Zfat      | 0,775575 | 0,00743  | 0,045 | 0,042 | 1 |
| Gm14486   | 0,77558  | -0,00095 | 0,004 | 0,005 | 1 |
| Pltp      | 0,77558  | -0,00095 | 0,004 | 0,005 | 1 |
| Btk       | 0,77558  | -0,00095 | 0,004 | 0,005 | 1 |
| Gm15298   | 0,77558  | -0,00095 | 0,004 | 0,005 | 1 |
| Bbs12     | 0,77558  | -0,00095 | 0,004 | 0,005 | 1 |
| Sis       | 0,77558  | -0,00095 | 0,004 | 0,005 | 1 |
| Olfml3    | 0,77558  | -0,00095 | 0,004 | 0,005 | 1 |
| Gm42918   | 0,77558  | -0,00095 | 0,004 | 0,005 | 1 |
| Cpa5      | 0,77558  | -0,00095 | 0,004 | 0,005 | 1 |
| Oscar     | 0,77558  | -0,00095 | 0,004 | 0,005 | 1 |
| Lrfn3     | 0,77558  | -0,00095 | 0,004 | 0,005 | 1 |
| Gm17102   | 0,77558  | -0,00095 | 0,004 | 0,005 | 1 |
| Ifitm10   | 0,77558  | -0,00095 | 0,004 | 0,005 | 1 |
| Mypn      | 0,77558  | -0,00095 | 0,004 | 0,005 | 1 |

|           |          |          |       |       |   |
|-----------|----------|----------|-------|-------|---|
| Npm2      | 0,77558  | -0,00095 | 0,004 | 0,005 | 1 |
| Olfr905   | 0,77558  | -0,00095 | 0,004 | 0,005 | 1 |
| AU023762  | 0,77558  | -0,00095 | 0,004 | 0,005 | 1 |
| Cmtm7     | 0,77558  | -0,00095 | 0,004 | 0,005 | 1 |
| Zfp652os  | 0,77558  | -0,00095 | 0,004 | 0,005 | 1 |
| Gm11592   | 0,77558  | -0,00095 | 0,004 | 0,005 | 1 |
| Rara      | 0,77558  | -0,00095 | 0,004 | 0,005 | 1 |
| Fkbp10    | 0,77558  | -0,00095 | 0,004 | 0,005 | 1 |
| Gm39397   | 0,77558  | -0,00095 | 0,004 | 0,005 | 1 |
| Ripor2    | 0,77558  | -0,00095 | 0,004 | 0,005 | 1 |
| Gm38604   | 0,77558  | -0,00095 | 0,004 | 0,005 | 1 |
| 4930592A( | 0,77558  | -0,00095 | 0,004 | 0,005 | 1 |
| Car15     | 0,77558  | -0,00095 | 0,004 | 0,005 | 1 |
| Zdhhc19   | 0,77558  | -0,00095 | 0,004 | 0,005 | 1 |
| Gm9968    | 0,77558  | -0,00095 | 0,004 | 0,005 | 1 |
| Pnlcd1    | 0,77558  | -0,00095 | 0,004 | 0,005 | 1 |
| Col17a1   | 0,77558  | -0,00095 | 0,004 | 0,005 | 1 |
| Gm31282   | 0,775581 | 0,00231  | 0,004 | 0,005 | 1 |
| Gm10767   | 0,775581 | -0,00061 | 0,004 | 0,005 | 1 |
| Gm15537   | 0,775581 | -0,00061 | 0,004 | 0,005 | 1 |
| Hoxb3     | 0,775581 | -0,00125 | 0,004 | 0,005 | 1 |
| Wrn       | 0,775601 | -0,01901 | 0,3   | 0,302 | 1 |
| Zc3h12c   | 0,775618 | -0,00384 | 0,146 | 0,151 | 1 |
| Syce2     | 0,775622 | 0,000696 | 0,007 | 0,008 | 1 |
| Cables1   | 0,775622 | 0,001668 | 0,007 | 0,008 | 1 |
| Eps8      | 0,775684 | 0,000468 | 0,022 | 0,02  | 1 |
| Ccnl1     | 0,775744 | 0,068179 | 0,649 | 0,672 | 1 |
| Dus3l     | 0,775794 | 0,014631 | 0,309 | 0,306 | 1 |
| Gm9856    | 0,775886 | 0,009204 | 0,067 | 0,063 | 1 |
| Stk40     | 0,775908 | 0,03174  | 0,153 | 0,151 | 1 |
| Cbx8      | 0,775979 | 0,004651 | 0,064 | 0,06  | 1 |
| Fanci     | 0,775992 | 0,002017 | 0,015 | 0,013 | 1 |
| Zxdb      | 0,776084 | 0,00249  | 0,135 | 0,141 | 1 |
| Vps45     | 0,776153 | 0,002892 | 0,251 | 0,26  | 1 |
| Sema4g    | 0,776289 | -0,00099 | 0,078 | 0,073 | 1 |
| Ccl2      | 0,776314 | 0,00264  | 0,004 | 0,005 | 1 |
| Nucb2     | 0,776513 | 0,001806 | 0,039 | 0,042 | 1 |
| Npb       | 0,776524 | -0,02495 | 0,082 | 0,086 | 1 |
| Rrp15     | 0,776605 | 0,017186 | 0,139 | 0,137 | 1 |
| Ywhah     | 0,776646 | 0,004082 | 0,605 | 0,584 | 1 |
| Sdcbp2    | 0,77668  | 0,001005 | 0,004 | 0,005 | 1 |
| Ptp4a3    | 0,77668  | 0,001005 | 0,004 | 0,005 | 1 |
| Frmpd1    | 0,77668  | 2,86E-05 | 0,004 | 0,005 | 1 |
| Samd11    | 0,77668  | 2,86E-05 | 0,004 | 0,005 | 1 |
| Gm42864   | 0,77668  | 2,86E-05 | 0,004 | 0,005 | 1 |
| Asprv1    | 0,77668  | 2,86E-05 | 0,004 | 0,005 | 1 |
| 1700028J1 | 0,77668  | 2,86E-05 | 0,004 | 0,005 | 1 |
| Gm26816   | 0,77668  | 2,86E-05 | 0,004 | 0,005 | 1 |
| Gm47414   | 0,77668  | 2,86E-05 | 0,004 | 0,005 | 1 |
| Gm26521   | 0,77668  | 2,86E-05 | 0,004 | 0,005 | 1 |
| Ccdc151   | 0,77668  | 2,86E-05 | 0,004 | 0,005 | 1 |
| Gm48393   | 0,77668  | 2,86E-05 | 0,004 | 0,005 | 1 |

|           |          |          |       |       |   |
|-----------|----------|----------|-------|-------|---|
| Pknox2    | 0,77668  | 2,86E-05 | 0,004 | 0,005 | 1 |
| Gm49380   | 0,77668  | 2,86E-05 | 0,004 | 0,005 | 1 |
| Gm26767   | 0,77668  | 2,86E-05 | 0,004 | 0,005 | 1 |
| Crtap     | 0,77668  | 2,86E-05 | 0,004 | 0,005 | 1 |
| Rrm2      | 0,77668  | 2,86E-05 | 0,004 | 0,005 | 1 |
| Fam71d    | 0,77668  | 2,86E-05 | 0,004 | 0,005 | 1 |
| Gm14424   | 0,776713 | -0,002   | 0,028 | 0,031 | 1 |
| Cd2bp2    | 0,776881 | -0,00398 | 0,352 | 0,358 | 1 |
| B230354K: | 0,776892 | -0,00027 | 0,157 | 0,164 | 1 |
| Gns       | 0,776903 | 0,011788 | 0,428 | 0,444 | 1 |
| 9530082P: | 0,776948 | -0,00238 | 0,06  | 0,063 | 1 |
| Sec14l1   | 0,777002 | 0,022525 | 0,511 | 0,506 | 1 |
| Pcdhb3    | 0,777025 | 0,00458  | 0,007 | 0,008 | 1 |
| Spg21     | 0,777027 | 0,004302 | 0,343 | 0,353 | 1 |
| Zfp689    | 0,777174 | -0,00092 | 0,052 | 0,055 | 1 |
| Dennd5a   | 0,777226 | 0,017363 | 0,957 | 0,946 | 1 |
| Xylt2     | 0,777379 | -0,00966 | 0,097 | 0,101 | 1 |
| Ulk1      | 0,777387 | 0,018814 | 0,233 | 0,228 | 1 |
| Gstcd     | 0,777598 | 0,007028 | 0,108 | 0,114 | 1 |
| Rrm2b     | 0,777622 | 0,023064 | 0,472 | 0,481 | 1 |
| Ppfia4    | 0,77778  | 0,00198  | 0,004 | 0,005 | 1 |
| Gm42851   | 0,77778  | 0,00198  | 0,004 | 0,005 | 1 |
| Gm21671   | 0,777821 | -0,00055 | 0,015 | 0,013 | 1 |
| Arsk      | 0,77785  | 0,009144 | 0,231 | 0,241 | 1 |
| Ift74     | 0,777905 | -0,00154 | 0,181 | 0,187 | 1 |
| Rimkla    | 0,777914 | 0,004936 | 0,045 | 0,042 | 1 |
| Slx1b     | 0,778011 | -0,00072 | 0,193 | 0,2   | 1 |
| Rabgap1   | 0,778035 | 0,00066  | 0,569 | 0,563 | 1 |
| Tshz1     | 0,778205 | -0,01586 | 0,535 | 0,53  | 1 |
| Dlg4      | 0,77833  | -0,0039  | 0,057 | 0,06  | 1 |
| Irx3      | 0,778428 | 0,003937 | 0,007 | 0,008 | 1 |
| Fam104a   | 0,778499 | 0,006787 | 0,525 | 0,525 | 1 |
| Hsdl1     | 0,7785   | -0,00547 | 0,24  | 0,247 | 1 |
| Arhgap11a | 0,778638 | 0,002036 | 0,015 | 0,013 | 1 |
| Leng1     | 0,778758 | 0,00306  | 0,3   | 0,312 | 1 |
| Drg1      | 0,778766 | -0,00381 | 0,498 | 0,507 | 1 |
| Mbd2      | 0,778793 | 0,019819 | 0,628 | 0,634 | 1 |
| Wdr53     | 0,778978 | -0,00566 | 0,116 | 0,12  | 1 |
| Gfm2      | 0,779011 | 0,009501 | 0,146 | 0,141 | 1 |
| Pim2      | 0,779043 | 0,000416 | 0,015 | 0,013 | 1 |
| Lrrc56    | 0,779226 | -0,00057 | 0,052 | 0,055 | 1 |
| Itsn1     | 0,779231 | 0,009562 | 0,129 | 0,124 | 1 |
| Dhcr7     | 0,779349 | 0,028645 | 0,596 | 0,602 | 1 |
| Sos1      | 0,779539 | -0,01416 | 0,519 | 0,522 | 1 |
| Serf1     | 0,779615 | 0,001863 | 0,11  | 0,115 | 1 |
| Atf7ip    | 0,779699 | 0,027659 | 0,727 | 0,759 | 1 |
| Snrnp35   | 0,779702 | 0,012614 | 0,183 | 0,177 | 1 |
| Prr11     | 0,780082 | 0,001729 | 0,021 | 0,023 | 1 |
| Lrrc14    | 0,780107 | 0,006953 | 0,181 | 0,189 | 1 |
| Smad2     | 0,780135 | 0,011616 | 0,162 | 0,158 | 1 |
| Oxld1     | 0,780405 | -0,0012  | 0,098 | 0,102 | 1 |
| Leng8     | 0,780466 | 0,000629 | 0,643 | 0,647 | 1 |

|           |          |          |       |       |   |
|-----------|----------|----------|-------|-------|---|
| A430073D: | 0,78067  | -0,00055 | 0,015 | 0,013 | 1 |
| Macrod2   | 0,780673 | 0,00356  | 0,216 | 0,223 | 1 |
| Strn4     | 0,780701 | 0,002589 | 0,641 | 0,624 | 1 |
| Parg      | 0,78073  | 0,006097 | 0,327 | 0,317 | 1 |
| Zfp90     | 0,780822 | 0,000775 | 0,227 | 0,218 | 1 |
| Napb      | 0,7809   | 0,011106 | 0,141 | 0,148 | 1 |
| Zfp27     | 0,780925 | -0,00436 | 0,078 | 0,081 | 1 |
| Chfr      | 0,78107  | 0,011718 | 0,393 | 0,408 | 1 |
| Bhlhb9    | 0,781079 | -0,00341 | 0,015 | 0,013 | 1 |
| Acvr1     | 0,781322 | -0,01145 | 0,184 | 0,189 | 1 |
| 9330175E1 | 0,781391 | -0,00303 | 0,022 | 0,02  | 1 |
| Rps6ka3   | 0,781403 | 0,003038 | 0,125 | 0,12  | 1 |
| Katnb1    | 0,78148  | 0,006151 | 0,151 | 0,146 | 1 |
| Gm14703   | 0,781485 | -0,00022 | 0,015 | 0,013 | 1 |
| Cnbd2     | 0,781586 | 0,006175 | 0,067 | 0,063 | 1 |
| Zfp146    | 0,781767 | -0,00215 | 0,119 | 0,124 | 1 |
| Acad9     | 0,781815 | -0,01759 | 0,224 | 0,226 | 1 |
| Vps35     | 0,781879 | 0,010115 | 0,904 | 0,893 | 1 |
| Ccdc148   | 0,782148 | -0,00439 | 0,1   | 0,104 | 1 |
| Fam151b   | 0,782223 | 0,011713 | 0,189 | 0,184 | 1 |
| Itpkc     | 0,782444 | 0,015558 | 0,095 | 0,101 | 1 |
| Coa5      | 0,782593 | 0,005612 | 0,212 | 0,207 | 1 |
| Rrp9      | 0,782821 | 0,015671 | 0,24  | 0,25  | 1 |
| Gm44777   | 0,782908 | -0,00839 | 0,062 | 0,065 | 1 |
| Rundc3a   | 0,782909 | 0,021972 | 0,46  | 0,465 | 1 |
| Pfas      | 0,783065 | -0,00461 | 0,2   | 0,207 | 1 |
| AC122413. | 0,783235 | -0,00046 | 0,028 | 0,031 | 1 |
| Ice1      | 0,78325  | 0,003436 | 0,421 | 0,437 | 1 |
| Slc13a5   | 0,783276 | -0,00311 | 0,044 | 0,047 | 1 |
| Zfp946    | 0,783764 | -0,00684 | 0,105 | 0,109 | 1 |
| Rab26os   | 0,783923 | -0,00121 | 0,052 | 0,055 | 1 |
| Mindy2    | 0,783977 | -0,00855 | 0,711 | 0,733 | 1 |
| Klf8      | 0,783984 | 0,003063 | 0,045 | 0,042 | 1 |
| Oplah     | 0,78423  | -0,00773 | 0,067 | 0,07  | 1 |
| Dscaml1   | 0,784282 | 0,015186 | 0,637 | 0,646 | 1 |
| Nkd1      | 0,784721 | -0,01578 | 0,556 | 0,559 | 1 |
| Acaa2     | 0,784757 | -0,00054 | 0,06  | 0,063 | 1 |
| Rif1      | 0,784913 | 0,021995 | 0,685 | 0,706 | 1 |
| Tmem128   | 0,785068 | 0,008234 | 0,545 | 0,527 | 1 |
| Zfp346    | 0,78532  | -0,00154 | 0,197 | 0,203 | 1 |
| As3mt     | 0,785385 | 0,011716 | 0,331 | 0,343 | 1 |
| Pkd1      | 0,785397 | 0,002257 | 0,325 | 0,335 | 1 |
| G0s2      | 0,785404 | 0,03239  | 0,124 | 0,119 | 1 |
| Fam98b    | 0,786113 | 0,003201 | 0,349 | 0,363 | 1 |
| 0610010K: | 0,786151 | -0,00407 | 0,321 | 0,327 | 1 |
| Fnbp4     | 0,786219 | -0,00608 | 0,364 | 0,377 | 1 |
| Gm29107   | 0,786317 | -0,00115 | 0,018 | 0,02  | 1 |
| Ablim2    | 0,786354 | 0,006028 | 0,495 | 0,511 | 1 |
| Zfp607a   | 0,786403 | 0,017549 | 0,05  | 0,047 | 1 |
| Hnrnpab   | 0,786418 | 0,002408 | 0,787 | 0,797 | 1 |
| Pnp       | 0,786428 | 0,041386 | 0,226 | 0,224 | 1 |
| Cript     | 0,786433 | 0,00041  | 0,82  | 0,847 | 1 |



|           |          |          |       |       |   |
|-----------|----------|----------|-------|-------|---|
| Bcl2l2    | 0,786496 | 0,008801 | 0,339 | 0,351 | 1 |
| Hoxaas3   | 0,7866   | -0,00069 | 0,036 | 0,039 | 1 |
| Dip2a     | 0,786791 | 0,007913 | 0,96  | 0,958 | 1 |
| Tmem64    | 0,786903 | 0,015836 | 0,086 | 0,083 | 1 |
| Xxylt1    | 0,786913 | -0,00348 | 0,207 | 0,213 | 1 |
| Adcy6     | 0,787506 | -0,00196 | 0,073 | 0,076 | 1 |
| Abi1      | 0,787664 | 0,029057 | 0,421 | 0,42  | 1 |
| Masp2     | 0,787697 | 0,0049   | 0,006 | 0,005 | 1 |
| Brinp2    | 0,787697 | 0,002954 | 0,006 | 0,005 | 1 |
| Olf328    | 0,787697 | 0,002954 | 0,006 | 0,005 | 1 |
| Lrrc24    | 0,787697 | 0,002954 | 0,006 | 0,005 | 1 |
| Gm49226   | 0,787697 | 0,002954 | 0,006 | 0,005 | 1 |
| Adgrf4    | 0,787697 | 0,002954 | 0,006 | 0,005 | 1 |
| Tbx2      | 0,787697 | 0,005871 | 0,006 | 0,005 | 1 |
| Clstn3    | 0,787697 | 0,003927 | 0,006 | 0,005 | 1 |
| Psmd12    | 0,787761 | 0,005871 | 0,59  | 0,615 | 1 |
| Fcf1      | 0,787779 | 0,016824 | 0,366 | 0,364 | 1 |
| Slc35f6   | 0,787875 | 0,005425 | 0,356 | 0,348 | 1 |
| Zfp951    | 0,787987 | -0,00647 | 0,026 | 0,028 | 1 |
| Tmem219   | 0,788407 | 1,43E-05 | 0,39  | 0,405 | 1 |
| Agt       | 0,788467 | -0,00019 | 0,018 | 0,02  | 1 |
| Trim3     | 0,788488 | 0,007756 | 0,569 | 0,558 | 1 |
| Slc15a2   | 0,788508 | 0,005871 | 0,038 | 0,036 | 1 |
| Prag1     | 0,788511 | 0,008974 | 0,465 | 0,457 | 1 |
| Cabp1     | 0,788671 | 0,003927 | 0,006 | 0,005 | 1 |
| 4930593A  | 0,788671 | 0,002954 | 0,006 | 0,005 | 1 |
| Gm10399   | 0,788671 | 0,002954 | 0,006 | 0,005 | 1 |
| Unc5a     | 0,788671 | 0,002954 | 0,006 | 0,005 | 1 |
| Reep2     | 0,788671 | 0,002954 | 0,006 | 0,005 | 1 |
| Hsd11b1   | 0,788671 | 0,00198  | 0,006 | 0,005 | 1 |
| Gja6      | 0,788671 | 0,00198  | 0,006 | 0,005 | 1 |
| Gm30097   | 0,788671 | 0,00198  | 0,006 | 0,005 | 1 |
| 1700094M  | 0,788671 | 0,00198  | 0,006 | 0,005 | 1 |
| Gm44037   | 0,788671 | 0,00198  | 0,006 | 0,005 | 1 |
| Il12rb2   | 0,788671 | 0,00198  | 0,006 | 0,005 | 1 |
| Ptpn5     | 0,788671 | 0,00198  | 0,006 | 0,005 | 1 |
| Rlbp1     | 0,788671 | 0,00198  | 0,006 | 0,005 | 1 |
| Hecw1     | 0,788671 | 0,00198  | 0,006 | 0,005 | 1 |
| Ppp1r18os | 0,788672 | 0,00231  | 0,006 | 0,005 | 1 |
| Gm32036   | 0,788767 | -0,00339 | 0,109 | 0,104 | 1 |
| Man2a2    | 0,788901 | 0,012153 | 0,806 | 0,816 | 1 |
| Drp2      | 0,788997 | 0,017755 | 0,006 | 0,005 | 1 |
| Grwd1     | 0,789025 | 0,009227 | 0,149 | 0,145 | 1 |
| Slc5a6    | 0,789067 | -0,00208 | 0,126 | 0,13  | 1 |
| Ddx58     | 0,789083 | -0,0093  | 0,054 | 0,057 | 1 |
| Taf8      | 0,789178 | 0,004477 | 0,155 | 0,15  | 1 |
| Rmdn2     | 0,789237 | 0,007696 | 0,067 | 0,063 | 1 |
| Tbrg4     | 0,78928  | 0,014135 | 0,162 | 0,158 | 1 |
| Cpne9     | 0,789322 | 0,004254 | 0,006 | 0,005 | 1 |
| Bend7     | 0,789322 | 0,00231  | 0,006 | 0,005 | 1 |
| Smyd5     | 0,789504 | -0,00064 | 0,132 | 0,137 | 1 |
| ldh1      | 0,789522 | -0,02514 | 0,537 | 0,53  | 1 |

|           |          |          |       |       |   |
|-----------|----------|----------|-------|-------|---|
| 2900009JC | 0,789646 | 0,001005 | 0,006 | 0,005 | 1 |
| Kif28     | 0,789646 | 0,001005 | 0,006 | 0,005 | 1 |
| Tmem236   | 0,789646 | 0,001005 | 0,006 | 0,005 | 1 |
| Ankef1    | 0,789646 | 0,001005 | 0,006 | 0,005 | 1 |
| Rhox8     | 0,789646 | 0,001005 | 0,006 | 0,005 | 1 |
| Cfap69    | 0,789646 | 0,001005 | 0,006 | 0,005 | 1 |
| 4933417D  | 0,789646 | 0,001005 | 0,006 | 0,005 | 1 |
| Gm16741   | 0,789646 | 0,001005 | 0,006 | 0,005 | 1 |
| Gm35818   | 0,789646 | 0,001005 | 0,006 | 0,005 | 1 |
| AC098883. | 0,789646 | 0,001005 | 0,006 | 0,005 | 1 |
| Gm21833   | 0,789646 | 0,001005 | 0,006 | 0,005 | 1 |
| AC125141. | 0,789646 | 0,001005 | 0,006 | 0,005 | 1 |
| Csf1r     | 0,789646 | 0,001005 | 0,006 | 0,005 | 1 |
| Hspa1l    | 0,789647 | 0,001337 | 0,006 | 0,005 | 1 |
| 2700081O  | 0,789744 | 0,000913 | 0,044 | 0,047 | 1 |
| Gm26518   | 0,789873 | 0,016811 | 0,227 | 0,237 | 1 |
| Sod1      | 0,789976 | 0,014425 | 0,719 | 0,746 | 1 |
| Vav2      | 0,790017 | 0,002427 | 0,036 | 0,039 | 1 |
| Plekhm3   | 0,79005  | -0,00696 | 0,331 | 0,34  | 1 |
| Cdc20     | 0,790073 | 0,002716 | 0,028 | 0,031 | 1 |
| Fam58b    | 0,790085 | 0,012403 | 0,216 | 0,211 | 1 |
| Arl13b    | 0,790317 | 0,001052 | 0,46  | 0,467 | 1 |
| Rwdd2a    | 0,790596 | 0,005563 | 0,055 | 0,052 | 1 |
| Gm45708   | 0,790622 | 0,000363 | 0,006 | 0,005 | 1 |
| Slc39a2   | 0,790622 | 0,000363 | 0,006 | 0,005 | 1 |
| Trim9     | 0,790622 | 0,000363 | 0,006 | 0,005 | 1 |
| Dio2      | 0,790622 | 0,000363 | 0,006 | 0,005 | 1 |
| AI987944  | 0,790667 | 0,029831 | 0,285 | 0,288 | 1 |
| Eri2      | 0,790744 | -0,00108 | 0,146 | 0,151 | 1 |
| Gtf3c3    | 0,790853 | 0,00487  | 0,233 | 0,241 | 1 |
| Pfn1      | 0,791008 | -0,00529 | 0,984 | 0,982 | 1 |
| Serhl     | 0,791154 | 0,000442 | 0,018 | 0,02  | 1 |
| Stk24     | 0,791441 | 0,00769  | 0,2   | 0,207 | 1 |
| Gm4349    | 0,791597 | -0,00061 | 0,006 | 0,005 | 1 |
| Cdk19os   | 0,791597 | -0,00061 | 0,006 | 0,005 | 1 |
| Gm26765   | 0,791597 | -0,00061 | 0,006 | 0,005 | 1 |
| Gm35256   | 0,791597 | -0,00061 | 0,006 | 0,005 | 1 |
| Pdpx      | 0,791722 | 0,00089  | 0,045 | 0,042 | 1 |
| Slc16a2   | 0,791757 | -0,00206 | 0,09  | 0,094 | 1 |
| Dapk3     | 0,791846 | -0,00678 | 0,374 | 0,384 | 1 |
| Thoc5     | 0,791894 | -0,00307 | 0,203 | 0,21  | 1 |
| Aco2      | 0,791948 | 0,027106 | 0,833 | 0,823 | 1 |
| Utp11     | 0,792028 | -0,00509 | 0,518 | 0,524 | 1 |
| Gm20939   | 0,792048 | 0,001075 | 0,018 | 0,02  | 1 |
| Deptor    | 0,79231  | -0,01306 | 0,242 | 0,246 | 1 |
| Smpd3     | 0,79272  | 0,001334 | 0,101 | 0,106 | 1 |
| Tmem81    | 0,792787 | 0,006125 | 0,233 | 0,226 | 1 |
| Fzr1      | 0,792915 | 0,004132 | 0,27  | 0,263 | 1 |
| Dynlt1a   | 0,792918 | 0,010135 | 0,126 | 0,122 | 1 |
| Rbm22     | 0,79305  | 0,011885 | 0,644 | 0,636 | 1 |
| Dnase1l1  | 0,793066 | 0,002427 | 0,036 | 0,039 | 1 |
| Med7      | 0,793082 | -0,00386 | 0,294 | 0,299 | 1 |

|           |          |          |       |       |   |
|-----------|----------|----------|-------|-------|---|
| Smpd2     | 0,793341 | 0,008347 | 0,165 | 0,161 | 1 |
| Cactin    | 0,793502 | 0,013774 | 0,173 | 0,169 | 1 |
| Zbtb1     | 0,793766 | 0,015746 | 0,214 | 0,224 | 1 |
| Nt5c2     | 0,793795 | 0,003569 | 0,229 | 0,223 | 1 |
| Ppp4r3a   | 0,793805 | 0,019007 | 0,483 | 0,486 | 1 |
| Cul9      | 0,793949 | 0,023455 | 0,268 | 0,267 | 1 |
| lqcg      | 0,794114 | 0,002378 | 0,026 | 0,024 | 1 |
| Tmem268   | 0,794208 | 0,025076 | 0,309 | 0,309 | 1 |
| Zfp608    | 0,794311 | 0,001315 | 0,378 | 0,385 | 1 |
| Zfp651    | 0,794324 | 0,018846 | 0,469 | 0,465 | 1 |
| Uck2      | 0,794342 | 0,008991 | 0,135 | 0,132 | 1 |
| Kcmf1     | 0,794381 | 0,024032 | 0,445 | 0,452 | 1 |
| Plagl2    | 0,794491 | 0,002023 | 0,085 | 0,089 | 1 |
| 1700019L1 | 0,794587 | 0,003991 | 0,036 | 0,039 | 1 |
| Map3k11   | 0,79467  | 0,036466 | 0,386 | 0,393 | 1 |
| Ssfa2     | 0,794858 | 0,020302 | 0,509 | 0,507 | 1 |
| ltpr2     | 0,794969 | 0,007217 | 0,256 | 0,263 | 1 |
| Anxa11    | 0,794971 | -0,00254 | 0,041 | 0,044 | 1 |
| Phlpp1    | 0,795062 | 0,001092 | 0,989 | 0,987 | 1 |
| Virma     | 0,795098 | -0,0058  | 0,296 | 0,304 | 1 |
| Ppp1r17   | 0,795117 | 0,009379 | 0,02  | 0,018 | 1 |
| Hspbp1    | 0,795147 | 0,021938 | 0,315 | 0,315 | 1 |
| Yeats2    | 0,795161 | 0,010241 | 0,253 | 0,263 | 1 |
| Adamts4   | 0,795183 | 0,003087 | 0,917 | 0,919 | 1 |
| Gm15952   | 0,795355 | -0,00046 | 0,026 | 0,028 | 1 |
| Lrp12     | 0,795558 | -0,0041  | 0,192 | 0,198 | 1 |
| Ncbp2     | 0,795559 | 0,01327  | 0,536 | 0,538 | 1 |
| Nsun6     | 0,795662 | -0,00488 | 0,256 | 0,262 | 1 |
| Nup133    | 0,796583 | 0,000963 | 0,256 | 0,263 | 1 |
| Nol11     | 0,796703 | 0,009794 | 0,269 | 0,265 | 1 |
| Ndufaf1   | 0,796798 | 0,000795 | 0,14  | 0,135 | 1 |
| Upp2      | 0,796813 | -0,02164 | 0,155 | 0,158 | 1 |
| Dusp10    | 0,797033 | 0,070644 | 0,417 | 0,434 | 1 |
| Tmem18    | 0,797146 | -0,00234 | 0,192 | 0,197 | 1 |
| PrkcsH    | 0,797222 | 0,018961 | 0,69  | 0,694 | 1 |
| Rsl1d1    | 0,797366 | -0,01052 | 0,571 | 0,559 | 1 |
| Pacsin3   | 0,797385 | -0,00273 | 0,56  | 0,546 | 1 |
| Crybb1    | 0,797458 | -0,00112 | 0,026 | 0,028 | 1 |
| Tbc1d2b   | 0,79749  | -0,00315 | 0,041 | 0,044 | 1 |
| Oser1     | 0,79763  | -0,00245 | 0,512 | 0,515 | 1 |
| Ppp1r37   | 0,797949 | 0,021636 | 0,54  | 0,541 | 1 |
| Erc2      | 0,797992 | 0,007255 | 0,154 | 0,161 | 1 |
| Tspan2    | 0,798023 | -0,01269 | 0,99  | 0,989 | 1 |
| Lamtor2   | 0,798182 | -0,01127 | 0,75  | 0,741 | 1 |
| 06100090  | 0,798265 | 0,00654  | 0,349 | 0,345 | 1 |
| Zfp142    | 0,798371 | 0,018343 | 0,184 | 0,182 | 1 |
| Utp15     | 0,798486 | -0,0006  | 0,18  | 0,174 | 1 |
| Yae1d1    | 0,798544 | 0,018431 | 0,487 | 0,48  | 1 |
| Wtap      | 0,798719 | -0,00077 | 0,398 | 0,392 | 1 |
| Med16     | 0,799223 | 0,006121 | 0,236 | 0,242 | 1 |
| Ggcx      | 0,79934  | 0,002668 | 0,101 | 0,106 | 1 |
| Rab33b    | 0,799391 | 0,002956 | 0,539 | 0,55  | 1 |

|          |          |          |       |       |   |
|----------|----------|----------|-------|-------|---|
| Eno3     | 0,799493 | 0,006186 | 0,028 | 0,031 | 1 |
| Nol4l    | 0,79953  | 0,015329 | 0,363 | 0,361 | 1 |
| Fuom     | 0,79955  | 0,001474 | 0,21  | 0,216 | 1 |
| Alkbh6   | 0,799553 | 0,001832 | 0,251 | 0,244 | 1 |
| Irf3     | 0,79971  | 0,011833 | 0,35  | 0,361 | 1 |
| Gm2694   | 0,799958 | 0,007028 | 0,101 | 0,098 | 1 |
| Cox16    | 0,799974 | -0,01644 | 0,135 | 0,138 | 1 |
| Syt15    | 0,800022 | -0,00016 | 0,026 | 0,028 | 1 |
| Nipsnap2 | 0,80017  | 9,5E-05  | 0,538 | 0,527 | 1 |
| Smc4     | 0,800285 | -0,00699 | 0,304 | 0,298 | 1 |
| Dad1     | 0,800412 | 0,010282 | 0,958 | 0,964 | 1 |
| Itfg2    | 0,80055  | 0,016413 | 0,335 | 0,33  | 1 |
| Mns1     | 0,800783 | 0,004292 | 0,026 | 0,028 | 1 |
| Dpm1     | 0,800789 | -0,01053 | 0,619 | 0,629 | 1 |
| Tor1b    | 0,800817 | -0,01711 | 0,397 | 0,405 | 1 |
| Tmem63b  | 0,800838 | 0,017023 | 0,619 | 0,628 | 1 |
| Tbpl1    | 0,800915 | 0,001508 | 0,232 | 0,224 | 1 |
| Mthfsd   | 0,800917 | 0,002889 | 0,168 | 0,174 | 1 |
| Gm38335  | 0,801009 | 0,011167 | 0,051 | 0,049 | 1 |
| Gm26772  | 0,801033 | 0,023689 | 0,013 | 0,011 | 1 |
| Gcfc2    | 0,801061 | 0,004753 | 0,132 | 0,137 | 1 |
| Casp7    | 0,801262 | -0,00437 | 0,015 | 0,016 | 1 |
| Sms      | 0,801437 | 0,015601 | 0,087 | 0,085 | 1 |
| Vps25    | 0,801479 | -0,00111 | 0,108 | 0,112 | 1 |
| Eid3     | 0,801485 | 0,006189 | 0,02  | 0,018 | 1 |
| Zfp319   | 0,801489 | 0,011663 | 0,16  | 0,156 | 1 |
| Ep400    | 0,801589 | 0,032176 | 0,486 | 0,498 | 1 |
| Gnptg    | 0,801617 | -0,01164 | 0,598 | 0,584 | 1 |
| Ppp1r14c | 0,801728 | -0,0058  | 0,054 | 0,057 | 1 |
| Gm9484   | 0,801891 | 0,002072 | 0,026 | 0,024 | 1 |
| Dap3     | 0,802028 | 0,015282 | 0,426 | 0,424 | 1 |
| Trmt6    | 0,802107 | 0,014071 | 0,343 | 0,356 | 1 |
| Ttc17    | 0,802201 | 0,011093 | 0,21  | 0,207 | 1 |
| Xpnpep3  | 0,802264 | 0,00669  | 0,159 | 0,166 | 1 |
| Mrps10   | 0,802548 | 0,010223 | 0,367 | 0,361 | 1 |
| Plin4    | 0,803201 | 0,007278 | 0,121 | 0,117 | 1 |
| Ptprg    | 0,803227 | -0,00312 | 0,015 | 0,016 | 1 |
| Apc2     | 0,803337 | 0,006432 | 0,144 | 0,14  | 1 |
| Capn10   | 0,803396 | -0,0062  | 0,208 | 0,215 | 1 |
| Naga     | 0,803425 | -0,00687 | 0,23  | 0,234 | 1 |
| Tchp     | 0,803453 | 0,012525 | 0,107 | 0,112 | 1 |
| Cpxm1    | 0,803668 | 0,003295 | 0,013 | 0,011 | 1 |
| Neur12   | 0,803668 | 0,003295 | 0,013 | 0,011 | 1 |
| Slc9b1   | 0,803668 | 0,004262 | 0,013 | 0,011 | 1 |
| Ccnt1    | 0,803668 | 0,032656 | 0,475 | 0,489 | 1 |
| Gm7361   | 0,8038   | 0,00112  | 0,026 | 0,028 | 1 |
| Nol12    | 0,803886 | 0,013642 | 0,309 | 0,307 | 1 |
| Glrx     | 0,803951 | 0,002072 | 0,026 | 0,028 | 1 |
| Ranbp2   | 0,803997 | 0,006348 | 0,582 | 0,584 | 1 |
| Gm34006  | 0,804058 | -0,00323 | 0,033 | 0,031 | 1 |
| Coq3     | 0,804473 | -0,00249 | 0,115 | 0,119 | 1 |
| Sema7a   | 0,804498 | -0,02398 | 0,594 | 0,584 | 1 |

|          |          |          |       |       |   |
|----------|----------|----------|-------|-------|---|
| Vps13b   | 0,804554 | 0,004063 | 0,322 | 0,333 | 1 |
| Vgll4    | 0,80458  | -0,00029 | 0,732 | 0,754 | 1 |
| Fancf    | 0,804857 | -0,0062  | 0,206 | 0,211 | 1 |
| Gm43137  | 0,804988 | 0,002655 | 0,013 | 0,011 | 1 |
| Map1s    | 0,805029 | -0,00539 | 0,307 | 0,314 | 1 |
| Kdm3a    | 0,805036 | 0,019614 | 0,357 | 0,372 | 1 |
| Acot9    | 0,805205 | -0,00674 | 0,163 | 0,167 | 1 |
| Gm15747  | 0,805206 | 0,008119 | 0,013 | 0,011 | 1 |
| Tmsb15l  | 0,805206 | 0,002328 | 0,013 | 0,011 | 1 |
| Map3k21  | 0,805206 | 0,002328 | 0,013 | 0,011 | 1 |
| Gpr19    | 0,805362 | 0,00173  | 0,149 | 0,154 | 1 |
| Gm36423  | 0,805648 | 0,001052 | 0,013 | 0,011 | 1 |
| Ilf2     | 0,805699 | 0,020418 | 0,723 | 0,737 | 1 |
| Slc25a45 | 0,80571  | 0,006718 | 0,137 | 0,133 | 1 |
| Mars2    | 0,805744 | -0,00227 | 0,143 | 0,138 | 1 |
| Zfp12    | 0,805966 | 0,002737 | 0,127 | 0,132 | 1 |
| Tfpt     | 0,806055 | 0,010841 | 0,314 | 0,309 | 1 |
| Plekhg2  | 0,806058 | 0,014583 | 0,036 | 0,039 | 1 |
| Elmod3   | 0,806712 | -0,00846 | 0,182 | 0,185 | 1 |
| Yars     | 0,806727 | 0,008074 | 0,355 | 0,367 | 1 |
| Pip4k2b  | 0,806733 | 0,008489 | 0,21  | 0,207 | 1 |
| Capn9    | 0,806745 | 0,001359 | 0,013 | 0,011 | 1 |
| Gm6297   | 0,806894 | -0,01239 | 0,043 | 0,046 | 1 |
| Yaf2     | 0,806932 | 0,007948 | 0,474 | 0,478 | 1 |
| Tmem9    | 0,80697  | -0,00839 | 0,109 | 0,112 | 1 |
| Naxe     | 0,806999 | -0,02041 | 0,692 | 0,683 | 1 |
| Top1     | 0,807005 | 0,031177 | 0,856 | 0,865 | 1 |
| Pcnx3    | 0,807005 | 0,002979 | 0,288 | 0,278 | 1 |
| Commd7   | 0,80705  | 0,024099 | 0,401 | 0,407 | 1 |
| Lrguk    | 0,807168 | -0,00118 | 0,015 | 0,016 | 1 |
| Neu3     | 0,807168 | -0,00118 | 0,015 | 0,016 | 1 |
| Kazald1  | 0,807168 | -0,00118 | 0,015 | 0,016 | 1 |
| Thop1    | 0,807446 | -0,00995 | 0,341 | 0,343 | 1 |
| GImp     | 0,807585 | -0,01681 | 0,638 | 0,639 | 1 |
| Mcm5     | 0,8076   | -0,00156 | 0,046 | 0,049 | 1 |
| Akap8    | 0,807681 | 0,004045 | 0,413 | 0,41  | 1 |
| Gm29361  | 0,807847 | 0,001052 | 0,013 | 0,011 | 1 |
| Copb2    | 0,807984 | 0,018891 | 0,479 | 0,499 | 1 |
| Rasa3    | 0,808018 | 0,018016 | 0,761 | 0,767 | 1 |
| Gm36899  | 0,808067 | 0,000721 | 0,013 | 0,011 | 1 |
| Tsg101   | 0,808096 | 0,004683 | 0,671 | 0,668 | 1 |
| Gm21814  | 0,808152 | -0,00055 | 0,015 | 0,016 | 1 |
| Ccnt2    | 0,808241 | 0,013666 | 0,674 | 0,68  | 1 |
| Gucd1    | 0,8084   | 0,007958 | 0,089 | 0,086 | 1 |
| Comtd1   | 0,808834 | -0,00487 | 0,223 | 0,228 | 1 |
| Nup62    | 0,808918 | 0,0067   | 0,165 | 0,161 | 1 |
| March2   | 0,808974 | -0,01449 | 0,642 | 0,629 | 1 |
| Fem1c    | 0,809534 | 0,012628 | 0,384 | 0,39  | 1 |
| Usp1     | 0,809573 | 0,010136 | 0,333 | 0,328 | 1 |
| Cnga1    | 0,809607 | -0,00025 | 0,013 | 0,011 | 1 |
| Xylb     | 0,809607 | -0,00025 | 0,013 | 0,011 | 1 |
| Nubp1    | 0,810101 | -0,01488 | 0,168 | 0,171 | 1 |

|           |          |          |       |       |   |
|-----------|----------|----------|-------|-------|---|
| Vps41     | 0,810132 | 0,011034 | 0,634 | 0,621 | 1 |
| Hook2     | 0,810159 | 0,012361 | 0,051 | 0,049 | 1 |
| Lamtor5   | 0,810239 | 0,002139 | 0,679 | 0,685 | 1 |
| Cwc27     | 0,810414 | -0,00308 | 0,284 | 0,291 | 1 |
| Ipo8      | 0,810488 | 0,006537 | 0,348 | 0,345 | 1 |
| Klc3      | 0,810711 | -0,00055 | 0,013 | 0,011 | 1 |
| Zfp637    | 0,810924 | 0,004274 | 0,455 | 0,45  | 1 |
| Lingo2    | 0,810933 | 0,000866 | 0,043 | 0,041 | 1 |
| Fam120aos | 0,811002 | -0,00339 | 0,051 | 0,054 | 1 |
| Zfp518b   | 0,811053 | -0,00238 | 0,062 | 0,059 | 1 |
| Mutyh     | 0,811117 | -0,0049  | 0,023 | 0,024 | 1 |
| Orai1     | 0,811253 | 0,005054 | 0,169 | 0,164 | 1 |
| Bcas3os1  | 0,811372 | -0,00215 | 0,013 | 0,011 | 1 |
| Pfkfb2    | 0,811393 | 0,008546 | 0,083 | 0,088 | 1 |
| Gm48420   | 0,811589 | -0,00211 | 0,02  | 0,018 | 1 |
| Mob2      | 0,81162  | 0,023225 | 0,384 | 0,389 | 1 |
| Selenom   | 0,81175  | -0,00811 | 0,968 | 0,972 | 1 |
| D17Wsu92  | 0,811946 | -0,00191 | 0,563 | 0,58  | 1 |
| Ptcra     | 0,812034 | -0,01536 | 0,013 | 0,011 | 1 |
| Pfkm      | 0,812076 | -0,0024  | 0,023 | 0,024 | 1 |
| 0610010FC | 0,81231  | 0,003896 | 0,245 | 0,254 | 1 |
| Zfp524    | 0,812367 | 0,00382  | 0,229 | 0,236 | 1 |
| Sfrp1     | 0,81265  | 7,55E-06 | 0,043 | 0,041 | 1 |
| Per3      | 0,812798 | 0,027876 | 0,236 | 0,234 | 1 |
| Nkapl     | 0,813097 | 0,006183 | 0,033 | 0,036 | 1 |
| Pnpla2    | 0,813183 | 0,011926 | 0,358 | 0,354 | 1 |
| Trim37    | 0,813195 | 0,005596 | 0,149 | 0,154 | 1 |
| Mast2     | 0,813262 | 0,009445 | 0,235 | 0,229 | 1 |
| Zfp707    | 0,813443 | 0,006763 | 0,088 | 0,093 | 1 |
| Nek1      | 0,813475 | 0,011781 | 0,208 | 0,203 | 1 |
| Lsg1      | 0,813529 | 0,004753 | 0,337 | 0,346 | 1 |
| Rrp36     | 0,813649 | 0,009684 | 0,358 | 0,372 | 1 |
| Ddit3     | 0,813727 | 0,069498 | 0,676 | 0,688 | 1 |
| Rras      | 0,813826 | 0,009962 | 0,097 | 0,094 | 1 |
| A030001D  | 0,813879 | -0,00233 | 0,1   | 0,104 | 1 |
| Upf1      | 0,814009 | -0,01284 | 0,473 | 0,48  | 1 |
| Foxo4     | 0,814055 | 0,005596 | 0,154 | 0,15  | 1 |
| Fkbp1     | 0,814072 | -0,00781 | 0,086 | 0,089 | 1 |
| Gm26519   | 0,814291 | 0,006809 | 0,033 | 0,036 | 1 |
| Hspb6     | 0,814706 | 0,00648  | 0,063 | 0,06  | 1 |
| Ndufa7    | 0,814741 | 0,01352  | 0,937 | 0,928 | 1 |
| Eny2      | 0,814934 | 0,004252 | 0,673 | 0,681 | 1 |
| Lpin2     | 0,814976 | 0,004357 | 0,058 | 0,055 | 1 |
| Grsf1     | 0,8155   | -0,0146  | 0,17  | 0,172 | 1 |
| Tmem151a  | 0,815707 | -0,01005 | 0,998 | 0,997 | 1 |
| Lysmd4    | 0,815736 | -0,00486 | 0,135 | 0,13  | 1 |
| Btd       | 0,816098 | -0,00459 | 0,152 | 0,156 | 1 |
| Usp5      | 0,81615  | 0,007344 | 0,594 | 0,597 | 1 |
| Pdss1     | 0,816202 | -0,00505 | 0,064 | 0,067 | 1 |
| Fryl      | 0,816281 | 0,025073 | 0,857 | 0,863 | 1 |
| Bckdk     | 0,816396 | 0,003748 | 0,305 | 0,314 | 1 |
| Synpr     | 0,816469 | -0,00718 | 0,03  | 0,033 | 1 |

|           |          |          |       |       |   |
|-----------|----------|----------|-------|-------|---|
| Arhgap35  | 0,816632 | 0,00319  | 0,402 | 0,411 | 1 |
| Usp24     | 0,816913 | 0,010038 | 0,341 | 0,353 | 1 |
| Guf1      | 0,816928 | 0,006407 | 0,175 | 0,171 | 1 |
| Pwwp2a    | 0,817013 | 0,014921 | 0,408 | 0,407 | 1 |
| Zfp408    | 0,817034 | 0,00069  | 0,06  | 0,057 | 1 |
| Arhgap15  | 0,817196 | 0,002187 | 0,09  | 0,094 | 1 |
| Wipf1     | 0,817257 | -0,00772 | 0,568 | 0,567 | 1 |
| Flot1     | 0,817498 | -0,03468 | 0,327 | 0,327 | 1 |
| Nsmce3    | 0,817536 | -0,00762 | 0,569 | 0,567 | 1 |
| Esyt1     | 0,817586 | 0,002537 | 0,065 | 0,062 | 1 |
| Khdrbs1   | 0,817647 | -0,00083 | 0,806 | 0,818 | 1 |
| Gmps      | 0,817688 | 0,009356 | 0,402 | 0,416 | 1 |
| H2afy2    | 0,817722 | 0,008865 | 0,082 | 0,08  | 1 |
| Stard7    | 0,81794  | 0,013556 | 0,449 | 0,45  | 1 |
| Lhfp14    | 0,817988 | -0,00332 | 0,165 | 0,169 | 1 |
| Gm17018   | 0,817996 | 0,02269  | 0,329 | 0,33  | 1 |
| Mroh1     | 0,818087 | 0,009171 | 0,155 | 0,151 | 1 |
| Leo1      | 0,818116 | -0,00335 | 0,316 | 0,319 | 1 |
| Ube2l3    | 0,818209 | 0,011514 | 0,942 | 0,946 | 1 |
| Zfp169    | 0,818283 | 0,006155 | 0,114 | 0,119 | 1 |
| Nptxr     | 0,818292 | 0,008671 | 0,041 | 0,039 | 1 |
| Pofut2    | 0,818329 | 0,006104 | 0,313 | 0,309 | 1 |
| Aox1      | 0,818826 | -0,00474 | 0,035 | 0,037 | 1 |
| Kctd15    | 0,818984 | 0,003553 | 0,099 | 0,096 | 1 |
| Dhx8      | 0,819103 | 0,008203 | 0,211 | 0,207 | 1 |
| Mrps17    | 0,819201 | 0,009655 | 0,486 | 0,502 | 1 |
| Bbs10     | 0,819322 | 0,000468 | 0,023 | 0,024 | 1 |
| Ptpn12    | 0,819366 | 0,015275 | 0,202 | 0,2   | 1 |
| Mprip     | 0,819546 | 0,011367 | 0,671 | 0,673 | 1 |
| Terf1     | 0,81964  | 0,000804 | 0,281 | 0,275 | 1 |
| Gnpda2    | 0,819664 | 0,006488 | 0,398 | 0,411 | 1 |
| Parp1     | 0,819739 | -0,0491  | 0,344 | 0,354 | 1 |
| 2810405F1 | 0,820089 | 0,007108 | 0,046 | 0,044 | 1 |
| Gtf2h5    | 0,820354 | 0,007297 | 0,763 | 0,771 | 1 |
| Sept2     | 0,820477 | 0,002691 | 0,189 | 0,195 | 1 |
| Srrm1     | 0,820491 | -0,00254 | 0,943 | 0,941 | 1 |
| Rnaseh2c  | 0,820586 | 0,025083 | 0,546 | 0,561 | 1 |
| Prdm9     | 0,820609 | 0,00301  | 0,023 | 0,024 | 1 |
| Yipf5     | 0,820658 | 0,007194 | 0,598 | 0,592 | 1 |
| Zmiz2     | 0,820717 | 0,00404  | 0,415 | 0,421 | 1 |
| Tpt1      | 0,820906 | 0,01588  | 1     | 1     | 1 |
| Supt7l    | 0,821251 | 0,006915 | 0,207 | 0,213 | 1 |
| Ikzf5     | 0,821649 | -0,01237 | 0,43  | 0,441 | 1 |
| Gm20219   | 0,821759 | 0,000819 | 0,03  | 0,033 | 1 |
| Apba2     | 0,821969 | 0,002028 | 0,128 | 0,124 | 1 |
| Gsto1     | 0,822112 | -0,00376 | 0,162 | 0,156 | 1 |
| Cap1      | 0,822217 | 0,000126 | 0,598 | 0,584 | 1 |
| Efl1      | 0,822313 | 0,011113 | 0,211 | 0,208 | 1 |
| Gm26982   | 0,822352 | 0,001098 | 0,025 | 0,023 | 1 |
| Wdr90     | 0,822355 | -0,00016 | 0,025 | 0,023 | 1 |
| Orai3     | 0,822403 | -0,00889 | 0,131 | 0,133 | 1 |
| Vmac      | 0,822475 | 0,003962 | 0,157 | 0,163 | 1 |

|          |          |          |       |       |   |
|----------|----------|----------|-------|-------|---|
| Pacs2    | 0,82263  | 0,020213 | 0,993 | 0,998 | 1 |
| Smu1     | 0,822681 | 0,00837  | 0,486 | 0,486 | 1 |
| Klf9     | 0,822817 | 0,032746 | 0,792 | 0,798 | 1 |
| Gm26514  | 0,822848 | -0,00312 | 0,012 | 0,013 | 1 |
| Tspan3   | 0,822863 | 0,000362 | 0,968 | 0,972 | 1 |
| Bach1    | 0,822877 | 0,00928  | 0,361 | 0,371 | 1 |
| Gar1     | 0,822967 | 0,001681 | 0,309 | 0,312 | 1 |
| Cbarp    | 0,823021 | 0,001143 | 0,03  | 0,033 | 1 |
| Stard10  | 0,823268 | -0,00837 | 0,296 | 0,283 | 1 |
| B3gnt2   | 0,823409 | 0,005554 | 0,029 | 0,028 | 1 |
| Fam45a   | 0,82345  | 0,003253 | 0,374 | 0,369 | 1 |
| Gas2l3   | 0,823511 | 0,002345 | 0,012 | 0,013 | 1 |
| Fam122a  | 0,823556 | -0,00614 | 0,249 | 0,254 | 1 |
| Dctn6    | 0,823839 | 0,012461 | 0,597 | 0,589 | 1 |
| Jph4     | 0,823936 | 0,046315 | 0,688 | 0,699 | 1 |
| Taf1b    | 0,823969 | 0,002541 | 0,222 | 0,228 | 1 |
| Srm      | 0,824054 | 0,024965 | 0,355 | 0,363 | 1 |
| Tmem218  | 0,824086 | -0,00171 | 0,069 | 0,072 | 1 |
| Mtg2     | 0,824372 | 0,014853 | 0,246 | 0,254 | 1 |
| Borcs8   | 0,824484 | 0,005351 | 0,21  | 0,205 | 1 |
| Actr1b   | 0,824543 | 0,015986 | 0,399 | 0,42  | 1 |
| Atp5h    | 0,824691 | 0,010691 | 0,988 | 0,995 | 1 |
| Tma7     | 0,824808 | 0,000782 | 0,834 | 0,849 | 1 |
| Polr3e   | 0,824818 | 0,010128 | 0,513 | 0,509 | 1 |
| 1500009C | 0,824838 | -0,00248 | 0,012 | 0,013 | 1 |
| Commd2   | 0,824917 | -0,00202 | 0,291 | 0,298 | 1 |
| Lpar1    | 0,825072 | -0,01424 | 0,977 | 0,98  | 1 |
| Fat1     | 0,825248 | 0,023832 | 0,379 | 0,384 | 1 |
| Mrpl2    | 0,825277 | 0,015045 | 0,343 | 0,345 | 1 |
| BC051226 | 0,82555  | 0,006697 | 0,166 | 0,163 | 1 |
| Pfdn2    | 0,825553 | 0,004853 | 0,847 | 0,857 | 1 |
| Noc4l    | 0,825664 | 0,000981 | 0,115 | 0,119 | 1 |
| Cfap126  | 0,825722 | -0,00185 | 0,012 | 0,013 | 1 |
| Cutc     | 0,825728 | -0,0031  | 0,081 | 0,085 | 1 |
| Rps4x    | 0,82575  | 0,003905 | 0,982 | 0,979 | 1 |
| Ang      | 0,825773 | -0,01157 | 0,045 | 0,047 | 1 |
| Zfp607b  | 0,82581  | -0,00944 | 0,126 | 0,128 | 1 |
| Zfp106   | 0,825844 | -0,00959 | 0,466 | 0,47  | 1 |
| Ptprk    | 0,825858 | 0,007045 | 0,532 | 0,553 | 1 |
| Cdc40    | 0,82589  | -0,00324 | 0,439 | 0,452 | 1 |
| A630072M | 0,8259   | 0,002522 | 0,063 | 0,06  | 1 |
| Ist1     | 0,826214 | -0,03207 | 0,578 | 0,554 | 1 |
| Rnf2     | 0,826238 | 0,012032 | 0,141 | 0,138 | 1 |
| Gm14409  | 0,826253 | 0,002624 | 0,004 | 0,003 | 1 |
| Irs3     | 0,826253 | 0,002624 | 0,004 | 0,003 | 1 |
| Gm45833  | 0,826253 | 0,002624 | 0,004 | 0,003 | 1 |
| Pde8b    | 0,826253 | 0,002624 | 0,004 | 0,003 | 1 |
| Gm16222  | 0,826253 | 0,004573 | 0,004 | 0,003 | 1 |
| Cmtm4    | 0,826309 | 0,005292 | 0,095 | 0,099 | 1 |
| Rabif    | 0,826476 | 0,002265 | 0,226 | 0,233 | 1 |
| 1110006O | 0,826606 | -0,00122 | 0,012 | 0,013 | 1 |
| Zfp459   | 0,826606 | -0,00122 | 0,012 | 0,013 | 1 |



|           |          |          |       |       |   |
|-----------|----------|----------|-------|-------|---|
| Trmt44    | 0,82685  | -0,00436 | 0,074 | 0,076 | 1 |
| Tmem151b  | 0,827058 | 0,003599 | 0,004 | 0,003 | 1 |
| Gm48342   | 0,827058 | 0,002624 | 0,004 | 0,003 | 1 |
| Gm26583   | 0,827058 | 0,002624 | 0,004 | 0,003 | 1 |
| Gm5475    | 0,827058 | 0,002624 | 0,004 | 0,003 | 1 |
| Cldn8     | 0,827058 | 0,002624 | 0,004 | 0,003 | 1 |
| Tmem182   | 0,827058 | 0,001648 | 0,004 | 0,003 | 1 |
| Olfr366   | 0,827058 | 0,001648 | 0,004 | 0,003 | 1 |
| Ptgfrn    | 0,827058 | 0,001648 | 0,004 | 0,003 | 1 |
| Wipf3     | 0,827058 | 0,001648 | 0,004 | 0,003 | 1 |
| Gm44662   | 0,827058 | 0,001648 | 0,004 | 0,003 | 1 |
| Phxr2     | 0,827058 | 0,001648 | 0,004 | 0,003 | 1 |
| Gm35166   | 0,827058 | 0,001648 | 0,004 | 0,003 | 1 |
| Islr      | 0,827058 | 0,001648 | 0,004 | 0,003 | 1 |
| Slc5a10   | 0,827058 | 0,001648 | 0,004 | 0,003 | 1 |
| Serpinf2  | 0,827058 | 0,001648 | 0,004 | 0,003 | 1 |
| Ppm1e     | 0,827058 | 0,001648 | 0,004 | 0,003 | 1 |
| Gpr22     | 0,827058 | 0,001648 | 0,004 | 0,003 | 1 |
| Fkbp11    | 0,827058 | 0,001648 | 0,004 | 0,003 | 1 |
| P3h2      | 0,827058 | 0,001648 | 0,004 | 0,003 | 1 |
| Popdc2    | 0,827058 | 0,001648 | 0,004 | 0,003 | 1 |
| AC159200. | 0,827058 | 0,001648 | 0,004 | 0,003 | 1 |
| Hoxb3os   | 0,827058 | 0,003283 | 0,004 | 0,003 | 1 |
| A430005L1 | 0,827239 | 0,001545 | 0,298 | 0,306 | 1 |
| Pten      | 0,82763  | -0,00187 | 0,643 | 0,646 | 1 |
| Srp68     | 0,827657 | 0,007383 | 0,377 | 0,387 | 1 |
| Uhrf2     | 0,827706 | -0,01744 | 0,525 | 0,524 | 1 |
| Gm15892   | 0,827714 | 0,001052 | 0,012 | 0,013 | 1 |
| Ftl1-ps1  | 0,827794 | 0,001519 | 0,166 | 0,172 | 1 |
| Igfbp2    | 0,827862 | 0,000671 | 0,004 | 0,003 | 1 |
| Gm31728   | 0,827862 | 0,000671 | 0,004 | 0,003 | 1 |
| 4930447M  | 0,827862 | 0,000671 | 0,004 | 0,003 | 1 |
| Zfp385b   | 0,827862 | 0,000671 | 0,004 | 0,003 | 1 |
| Olfr1260  | 0,827862 | 0,000671 | 0,004 | 0,003 | 1 |
| Bbox1     | 0,827862 | 0,000671 | 0,004 | 0,003 | 1 |
| Gm14435   | 0,827862 | 0,000671 | 0,004 | 0,003 | 1 |
| Bex4      | 0,827862 | 0,000671 | 0,004 | 0,003 | 1 |
| Gm42812   | 0,827862 | 0,000671 | 0,004 | 0,003 | 1 |
| 170002211 | 0,827862 | 0,000671 | 0,004 | 0,003 | 1 |
| Gm13212   | 0,827862 | 0,000671 | 0,004 | 0,003 | 1 |
| Cort      | 0,827862 | 0,000671 | 0,004 | 0,003 | 1 |
| Dnah10    | 0,827862 | 0,000671 | 0,004 | 0,003 | 1 |
| Gm44287   | 0,827862 | 0,000671 | 0,004 | 0,003 | 1 |
| Pirb      | 0,827862 | 0,000671 | 0,004 | 0,003 | 1 |
| Vmn1r76   | 0,827862 | 0,000671 | 0,004 | 0,003 | 1 |
| Gm9844    | 0,827862 | 0,000671 | 0,004 | 0,003 | 1 |
| B230208H  | 0,827862 | 0,000671 | 0,004 | 0,003 | 1 |
| Gm20597   | 0,827862 | 0,000671 | 0,004 | 0,003 | 1 |
| Syt1      | 0,827862 | 0,000671 | 0,004 | 0,003 | 1 |
| F420014N  | 0,827862 | 0,000671 | 0,004 | 0,003 | 1 |
| Gm26768   | 0,827862 | 0,000671 | 0,004 | 0,003 | 1 |
| Cyp4v3    | 0,827862 | 0,000671 | 0,004 | 0,003 | 1 |

|          |          |          |       |       |   |
|----------|----------|----------|-------|-------|---|
| Disc1    | 0,827862 | 0,000671 | 0,004 | 0,003 | 1 |
| Gm10873  | 0,827862 | 0,000671 | 0,004 | 0,003 | 1 |
| Gm33054  | 0,827862 | 0,000671 | 0,004 | 0,003 | 1 |
| Gm5431   | 0,827862 | 0,000671 | 0,004 | 0,003 | 1 |
| Zfp750   | 0,827862 | 0,000671 | 0,004 | 0,003 | 1 |
| AK157302 | 0,827862 | 0,000671 | 0,004 | 0,003 | 1 |
| Gm2762   | 0,827862 | 0,000671 | 0,004 | 0,003 | 1 |
| Gm48116  | 0,827862 | 0,000671 | 0,004 | 0,003 | 1 |
| Acot12   | 0,827862 | 0,000671 | 0,004 | 0,003 | 1 |
| Gm26520  | 0,827862 | 0,000671 | 0,004 | 0,003 | 1 |
| Gm49227  | 0,827862 | 0,000671 | 0,004 | 0,003 | 1 |
| Angptl4  | 0,827862 | 0,000671 | 0,004 | 0,003 | 1 |
| Gm10093  | 0,827862 | 0,000671 | 0,004 | 0,003 | 1 |
| Colec12  | 0,827862 | 0,000671 | 0,004 | 0,003 | 1 |
| Mppe1    | 0,827862 | 0,000671 | 0,004 | 0,003 | 1 |
| Capn1    | 0,827862 | 0,000671 | 0,004 | 0,003 | 1 |
| Cyb561a3 | 0,827862 | 0,000671 | 0,004 | 0,003 | 1 |
| Pdzd8    | 0,827907 | -0,02139 | 0,473 | 0,473 | 1 |
| Atp5g1   | 0,828056 | -0,0029  | 0,948 | 0,945 | 1 |
| Gm4279   | 0,828093 | -0,00112 | 0,025 | 0,023 | 1 |
| Gm47117  | 0,828265 | 0,000363 | 0,004 | 0,003 | 1 |
| Pcgf2    | 0,828265 | 0,000363 | 0,004 | 0,003 | 1 |
| lqch     | 0,828378 | 0,000721 | 0,012 | 0,013 | 1 |
| Gm20632  | 0,828378 | -0,00025 | 0,012 | 0,013 | 1 |
| Ube2q1   | 0,828462 | 0,004135 | 0,457 | 0,468 | 1 |
| Gm2814   | 0,828668 | 2,86E-05 | 0,004 | 0,003 | 1 |
| 1700067K | 0,828668 | 2,86E-05 | 0,004 | 0,003 | 1 |
| Zfp870   | 0,828901 | -2E-05   | 0,048 | 0,046 | 1 |
| Crot     | 0,828928 | -0,00212 | 0,295 | 0,304 | 1 |
| Tmem169  | 0,829039 | 0,00109  | 0,079 | 0,076 | 1 |
| Trappc10 | 0,829195 | 0,000874 | 0,843 | 0,868 | 1 |
| Cldn12   | 0,829271 | 0,002023 | 0,082 | 0,086 | 1 |
| Kcnn1    | 0,829398 | 0,008387 | 0,034 | 0,033 | 1 |
| Cand2    | 0,829473 | -0,00095 | 0,004 | 0,003 | 1 |
| Mia      | 0,829473 | -0,00095 | 0,004 | 0,003 | 1 |
| Ppil6    | 0,829473 | -0,00095 | 0,004 | 0,003 | 1 |
| Ttc36    | 0,829473 | -0,00095 | 0,004 | 0,003 | 1 |
| Dhx58    | 0,829473 | -0,00095 | 0,004 | 0,003 | 1 |
| Six4     | 0,829473 | -0,00095 | 0,004 | 0,003 | 1 |
| Dlec1    | 0,829473 | -0,00257 | 0,004 | 0,003 | 1 |
| Rnase1   | 0,829486 | 0,001052 | 0,012 | 0,013 | 1 |
| Tpd52l2  | 0,829524 | -0,00097 | 0,657 | 0,66  | 1 |
| Syn1     | 0,829559 | -0,00301 | 0,113 | 0,117 | 1 |
| Elf1     | 0,829652 | 0,032233 | 0,309 | 0,312 | 1 |
| Mta3     | 0,829668 | -0,00805 | 0,554 | 0,559 | 1 |
| Blmh     | 0,829906 | 0,002725 | 0,532 | 0,533 | 1 |
| Zkscan7  | 0,829926 | -0,00524 | 0,101 | 0,104 | 1 |
| Etfbkmt  | 0,830107 | 0,004923 | 0,029 | 0,028 | 1 |
| Zfp78    | 0,830107 | 0,004923 | 0,029 | 0,028 | 1 |
| C1ql1    | 0,83015  | 0,000721 | 0,012 | 0,013 | 1 |
| Nppc     | 0,830342 | -0,00937 | 0,161 | 0,156 | 1 |
| Sec63    | 0,830388 | 0,016318 | 0,635 | 0,629 | 1 |

|           |          |          |       |       |   |
|-----------|----------|----------|-------|-------|---|
| Cryl1     | 0,830595 | 0,00427  | 0,012 | 0,013 | 1 |
| Setd1b    | 0,830645 | 0,001246 | 0,389 | 0,397 | 1 |
| Chd1      | 0,830784 | 0,021187 | 0,372 | 0,377 | 1 |
| Gm45902   | 0,830931 | 0,010858 | 0,039 | 0,037 | 1 |
| Atpaf2    | 0,830958 | -0,00348 | 0,102 | 0,099 | 1 |
| Ccndbp1   | 0,830973 | 0,017951 | 0,635 | 0,644 | 1 |
| 9330160F1 | 0,831025 | 0,008376 | 0,034 | 0,033 | 1 |
| Bpifb4    | 0,831084 | -0,00257 | 0,004 | 0,003 | 1 |
| 1700096K: | 0,831378 | 0,005871 | 0,189 | 0,185 | 1 |
| Rai1      | 0,831681 | -0,00201 | 0,126 | 0,13  | 1 |
| Zfp638    | 0,831743 | -0,01325 | 0,81  | 0,813 | 1 |
| Taf13     | 0,831772 | 0,011397 | 0,555 | 0,564 | 1 |
| Gm21847   | 0,831923 | 0,003621 | 0,012 | 0,013 | 1 |
| Asf1b     | 0,831923 | 0,003621 | 0,012 | 0,013 | 1 |
| Mettl9    | 0,832031 | -0,0157  | 0,596 | 0,584 | 1 |
| Cwc25     | 0,832225 | -0,00198 | 0,32  | 0,325 | 1 |
| Lrrc27    | 0,832423 | 0,001381 | 0,018 | 0,016 | 1 |
| C030037D: | 0,832423 | 0,001381 | 0,018 | 0,016 | 1 |
| Calr3     | 0,832425 | 0,000113 | 0,018 | 0,016 | 1 |
| Zfp647    | 0,832506 | -0,00072 | 0,035 | 0,037 | 1 |
| Fxyd4     | 0,832559 | -0,00303 | 0,025 | 0,023 | 1 |
| Mettl1    | 0,832579 | 0,00848  | 0,269 | 0,278 | 1 |
| Trib2     | 0,832648 | -0,00098 | 0,035 | 0,037 | 1 |
| Lrrc8c    | 0,832757 | -0,002   | 0,343 | 0,335 | 1 |
| Nudcd1    | 0,832798 | 0,005588 | 0,132 | 0,13  | 1 |
| Gm15462   | 0,833033 | 0,002982 | 0,012 | 0,013 | 1 |
| Nup54     | 0,833087 | 0,004831 | 0,222 | 0,218 | 1 |
| Ier3      | 0,833329 | 0,009568 | 0,034 | 0,033 | 1 |
| Rapgef3   | 0,833552 | -0,01915 | 0,171 | 0,172 | 1 |
| Nsd1      | 0,83361  | 0,011    | 0,689 | 0,694 | 1 |
| Zfp273    | 0,833629 | 0,003522 | 0,092 | 0,096 | 1 |
| Ciz1      | 0,833637 | -0,0052  | 0,237 | 0,239 | 1 |
| Camta2    | 0,833914 | 0,005607 | 0,197 | 0,203 | 1 |
| Mttp      | 0,833957 | -0,00132 | 0,112 | 0,115 | 1 |
| Rb1cc1    | 0,834274 | 0,022629 | 0,754 | 0,771 | 1 |
| Kirrel3   | 0,834455 | 0,028953 | 0,17  | 0,167 | 1 |
| Shroom2   | 0,834506 | 0,014255 | 0,585 | 0,587 | 1 |
| Men1      | 0,834606 | 0,00264  | 0,258 | 0,265 | 1 |
| Usp33     | 0,834608 | 0,001759 | 0,362 | 0,354 | 1 |
| Set       | 0,834865 | 0,006234 | 0,963 | 0,958 | 1 |
| Aagab     | 0,834978 | 0,001847 | 0,184 | 0,18  | 1 |
| Atp5j     | 0,835038 | 0,010809 | 0,969 | 0,972 | 1 |
| Ndufs2    | 0,835327 | -0,0114  | 0,853 | 0,867 | 1 |
| Eid2      | 0,835436 | -0,00161 | 0,077 | 0,08  | 1 |
| 4921524J1 | 0,835457 | 0,003977 | 0,173 | 0,169 | 1 |
| Ascc2     | 0,83551  | -0,00054 | 0,215 | 0,221 | 1 |
| 9630013A: | 0,83561  | 0,024062 | 0,011 | 0,01  | 1 |
| Gm13905   | 0,835682 | -0,00082 | 0,02  | 0,021 | 1 |
| Plek      | 0,835852 | -0,00052 | 0,02  | 0,021 | 1 |
| Fam161b   | 0,835966 | 0,005316 | 0,143 | 0,148 | 1 |
| Mrpl57    | 0,835973 | 0,006666 | 0,421 | 0,431 | 1 |
| Fndc4     | 0,836014 | 0,001252 | 0,048 | 0,05  | 1 |

|           |          |          |       |       |   |
|-----------|----------|----------|-------|-------|---|
| Fbxo22    | 0,836335 | -0,01228 | 0,289 | 0,289 | 1 |
| Sox13     | 0,836639 | 0,001918 | 0,064 | 0,067 | 1 |
| Tmem150a  | 0,836953 | -0,00682 | 0,296 | 0,299 | 1 |
| Tfam      | 0,836998 | -0,0118  | 0,358 | 0,346 | 1 |
| A730015C: | 0,837052 | 0,005871 | 0,011 | 0,01  | 1 |
| Utrn      | 0,837052 | 0,009728 | 0,011 | 0,01  | 1 |
| Rptor     | 0,837228 | 0,003339 | 0,236 | 0,234 | 1 |
| Gm2000    | 0,837331 | -0,0044  | 0,098 | 0,101 | 1 |
| Brsk2     | 0,837354 | 0,020932 | 0,34  | 0,354 | 1 |
| Mgll      | 0,837406 | 0,020979 | 0,245 | 0,257 | 1 |
| Zfp85     | 0,837553 | 0,003089 | 0,051 | 0,049 | 1 |
| Dhps      | 0,837639 | 0,007454 | 0,426 | 0,442 | 1 |
| Gm4673    | 0,837667 | 0,014703 | 0,184 | 0,18  | 1 |
| Fbxw16    | 0,837691 | -0,00082 | 0,018 | 0,016 | 1 |
| Eepd1     | 0,83772  | 0,004965 | 0,072 | 0,075 | 1 |
| Hspa12a   | 0,837805 | -0,01007 | 0,037 | 0,039 | 1 |
| Bdp1      | 0,838009 | 0,057239 | 0,352 | 0,359 | 1 |
| Sfn       | 0,838495 | 0,002968 | 0,011 | 0,01  | 1 |
| Gm5577    | 0,838495 | 0,002968 | 0,011 | 0,01  | 1 |
| Gm48914   | 0,838495 | 0,002968 | 0,011 | 0,01  | 1 |
| Gm5427    | 0,838495 | 0,003937 | 0,011 | 0,01  | 1 |
| Zfp382    | 0,838599 | 0,011386 | 0,059 | 0,057 | 1 |
| Fam118b   | 0,838681 | 0,004734 | 0,135 | 0,132 | 1 |
| Pcgf1     | 0,838925 | 0,00264  | 0,104 | 0,101 | 1 |
| Pabpn1    | 0,839026 | 0,020928 | 0,801 | 0,829 | 1 |
| Gm28041   | 0,839152 | 0,00077  | 0,02  | 0,021 | 1 |
| Atp5b     | 0,839211 | 0,007176 | 0,997 | 0,995 | 1 |
| Surf6     | 0,839234 | 0,00325  | 0,204 | 0,2   | 1 |
| Uvssa     | 0,839681 | -0,00702 | 0,258 | 0,262 | 1 |
| D730003I1 | 0,839683 | 0,014138 | 0,237 | 0,236 | 1 |
| Rag1      | 0,839699 | 0,002328 | 0,011 | 0,01  | 1 |
| Gm16192   | 0,839938 | 0,001999 | 0,011 | 0,01  | 1 |
| 1700105P( | 0,839938 | 0,001999 | 0,011 | 0,01  | 1 |
| Zfyve21   | 0,840149 | 0,027684 | 0,464 | 0,475 | 1 |
| Zzz3      | 0,840503 | 0,011002 | 0,57  | 0,563 | 1 |
| Ranbp3    | 0,840504 | -0,0123  | 0,358 | 0,359 | 1 |
| Ankmy2    | 0,840536 | -0,0033  | 0,14  | 0,145 | 1 |
| Lrrc58    | 0,840563 | 0,009178 | 0,911 | 0,914 | 1 |
| Skp2      | 0,840631 | -0,00534 | 0,083 | 0,086 | 1 |
| Id2       | 0,840642 | 0,033464 | 0,103 | 0,107 | 1 |
| Pfkfb4    | 0,840814 | 0,007194 | 0,18  | 0,176 | 1 |
| Gm38534   | 0,840889 | -0,00178 | 0,018 | 0,016 | 1 |
| Creb3l2   | 0,840921 | 0,025724 | 0,536 | 0,533 | 1 |
| 1700040D: | 0,841143 | 0,001359 | 0,011 | 0,01  | 1 |
| Gm43567   | 0,841143 | 0,001359 | 0,011 | 0,01  | 1 |
| Gm340     | 0,841162 | 0,012795 | 0,07  | 0,073 | 1 |
| Hoxd4     | 0,841382 | 0,001028 | 0,011 | 0,01  | 1 |
| Zfp609    | 0,841387 | 0,01281  | 0,267 | 0,263 | 1 |
| Abhd14a   | 0,841496 | -0,00345 | 0,488 | 0,493 | 1 |
| Plcb3     | 0,841627 | 0,000194 | 0,027 | 0,029 | 1 |
| Lrrtm2    | 0,841845 | 0,010694 | 0,251 | 0,247 | 1 |
| 1110008P: | 0,841994 | 0,006109 | 0,289 | 0,286 | 1 |

|           |          |          |       |       |   |
|-----------|----------|----------|-------|-------|---|
| Kdm5b     | 0,842042 | 0,013343 | 0,387 | 0,389 | 1 |
| Becn1     | 0,842187 | -0,01327 | 0,412 | 0,407 | 1 |
| Lman2     | 0,84224  | 0,010036 | 0,565 | 0,563 | 1 |
| Eme2      | 0,842245 | 0,00209  | 0,034 | 0,033 | 1 |
| Tmem217   | 0,842347 | 0,002328 | 0,011 | 0,01  | 1 |
| Shroom4   | 0,842347 | 0,000721 | 0,011 | 0,01  | 1 |
| Sprtn     | 0,842439 | 0,009961 | 0,175 | 0,172 | 1 |
| C730034FC | 0,842458 | 0,008632 | 0,059 | 0,057 | 1 |
| Usp20     | 0,842464 | 0,000656 | 0,205 | 0,21  | 1 |
| Igf2bp3   | 0,84257  | -0,00099 | 0,117 | 0,12  | 1 |
| Sh3d21    | 0,842587 | 0,00039  | 0,011 | 0,01  | 1 |
| M6pr      | 0,842608 | -0,00648 | 0,864 | 0,865 | 1 |
| Gnptab    | 0,842736 | 0,010189 | 0,615 | 0,642 | 1 |
| Gm32568   | 0,842828 | -0,00122 | 0,011 | 0,01  | 1 |
| Zfp654    | 0,842838 | 0,00427  | 0,185 | 0,19  | 1 |
| 2510046G  | 0,843156 | -0,00131 | 0,04  | 0,042 | 1 |
| Trappc9   | 0,843317 | 0,006319 | 0,342 | 0,351 | 1 |
| Chic1     | 0,843586 | -0,01295 | 0,241 | 0,244 | 1 |
| Gm47438   | 0,843604 | 0,004598 | 0,023 | 0,021 | 1 |
| Sec61a1   | 0,843622 | 0,018768 | 0,636 | 0,626 | 1 |
| Cep97     | 0,843623 | 0,002505 | 0,612 | 0,631 | 1 |
| Cenpu     | 0,844032 | -0,00058 | 0,011 | 0,01  | 1 |
| Rasd2     | 0,844032 | -0,00058 | 0,011 | 0,01  | 1 |
| Ccdc85b   | 0,844042 | 0,007496 | 0,532 | 0,541 | 1 |
| Cask      | 0,844095 | -0,00147 | 0,282 | 0,286 | 1 |
| Cul4a     | 0,84438  | 0,021341 | 0,356 | 0,358 | 1 |
| Tmem147   | 0,844426 | 0,008515 | 0,754 | 0,784 | 1 |
| Cbx3      | 0,844547 | 0,002722 | 0,933 | 0,963 | 1 |
| Hps6      | 0,844602 | -0,00395 | 0,05  | 0,052 | 1 |
| Pds5b     | 0,844618 | 0,020591 | 0,468 | 0,468 | 1 |
| Relb      | 0,844659 | 0,002518 | 0,142 | 0,146 | 1 |
| Nsf       | 0,844663 | 0,018474 | 0,269 | 0,268 | 1 |
| Cisd3     | 0,844841 | 0,0122   | 0,204 | 0,202 | 1 |
| Mff       | 0,845005 | 0,015802 | 0,761 | 0,79  | 1 |
| Mosmo     | 0,845029 | 0,006073 | 0,414 | 0,431 | 1 |
| Ghdc      | 0,84503  | -0,01105 | 0,208 | 0,21  | 1 |
| Insig2    | 0,845072 | 0,001876 | 0,349 | 0,361 | 1 |
| Eif4g1    | 0,845088 | -0,00557 | 0,754 | 0,774 | 1 |
| Prkag2    | 0,845104 | -0,00262 | 0,032 | 0,034 | 1 |
| Lias      | 0,845161 | 0,004771 | 0,353 | 0,363 | 1 |
| Slc35b4   | 0,845214 | 0,003377 | 0,251 | 0,247 | 1 |
| Cdkn2a    | 0,84541  | -0,00907 | 0,017 | 0,018 | 1 |
| Npr2      | 0,845438 | 0,00301  | 0,023 | 0,021 | 1 |
| Faap20    | 0,845482 | 0,001678 | 0,142 | 0,146 | 1 |
| Gm45495   | 0,845551 | -0,00341 | 0,079 | 0,076 | 1 |
| Larp7     | 0,845801 | 0,021791 | 0,258 | 0,272 | 1 |
| Cln5      | 0,845809 | 0,013228 | 0,42  | 0,423 | 1 |
| Kmt5c     | 0,845812 | -0,00153 | 0,162 | 0,166 | 1 |
| Lats1     | 0,845833 | 0,0013   | 0,362 | 0,353 | 1 |
| Casd1     | 0,845967 | 0,007589 | 0,255 | 0,25  | 1 |
| Abraxas2  | 0,846205 | 0,003896 | 0,255 | 0,263 | 1 |
| Pex14     | 0,846477 | -0,00396 | 0,27  | 0,273 | 1 |

|          |          |          |       |       |   |
|----------|----------|----------|-------|-------|---|
| Foxn3    | 0,8465   | 0,014292 | 0,996 | 1     | 1 |
| Mlkl     | 0,846538 | -0,00596 | 0,017 | 0,018 | 1 |
| Strbp    | 0,846693 | 0,010528 | 0,242 | 0,239 | 1 |
| Mtss1l   | 0,846723 | 0,001879 | 0,173 | 0,177 | 1 |
| Fam49a   | 0,846753 | -0,00316 | 0,009 | 0,01  | 1 |
| Tor1a    | 0,84702  | 0,007882 | 0,371 | 0,367 | 1 |
| Eif2a    | 0,847476 | 0,006808 | 0,487 | 0,48  | 1 |
| Mpdu1    | 0,847519 | 0,010281 | 0,511 | 0,512 | 1 |
| Cfap74   | 0,847522 | -0,00252 | 0,009 | 0,01  | 1 |
| Dcbld1   | 0,847522 | -0,00252 | 0,009 | 0,01  | 1 |
| C1qbp    | 0,847567 | 0,010737 | 0,597 | 0,613 | 1 |
| Zfp37    | 0,847677 | -0,01261 | 0,264 | 0,263 | 1 |
| Smad1    | 0,847809 | 0,005395 | 0,281 | 0,276 | 1 |
| Rnf139   | 0,848008 | 0,016883 | 0,329 | 0,325 | 1 |
| Kdelc2   | 0,848359 | 0,004009 | 0,044 | 0,042 | 1 |
| Ing1     | 0,848384 | 0,021184 | 0,411 | 0,411 | 1 |
| Cdc42ep2 | 0,848424 | -0,0019  | 0,963 | 0,959 | 1 |
| Myo10    | 0,848435 | 0,00014  | 0,023 | 0,021 | 1 |
| Prtg     | 0,848503 | 0,016163 | 0,106 | 0,104 | 1 |
| Tmem181a | 0,848692 | 0,015036 | 0,357 | 0,366 | 1 |
| Ndufaf2  | 0,848721 | 0,003336 | 0,545 | 0,566 | 1 |
| Caskin1  | 0,848725 | -0,00394 | 0,025 | 0,026 | 1 |
| Anapc15  | 0,848999 | 0,004767 | 0,153 | 0,15  | 1 |
| Gdpd5    | 0,849068 | 0,003988 | 0,388 | 0,398 | 1 |
| Tnpo3    | 0,849089 | 0,00443  | 0,487 | 0,494 | 1 |
| Gm43518  | 0,849319 | 0,00039  | 0,009 | 0,01  | 1 |
| Kcna4    | 0,849437 | 0,002054 | 0,023 | 0,021 | 1 |
| Fcor     | 0,849817 | 0,00939  | 0,443 | 0,444 | 1 |
| Nabl     | 0,849832 | -0,00092 | 0,009 | 0,01  | 1 |
| Gm14508  | 0,849832 | -0,00092 | 0,009 | 0,01  | 1 |
| Arhgef25 | 0,849832 | -0,00092 | 0,009 | 0,01  | 1 |
| Ewsr1    | 0,849924 | -0,00611 | 0,827 | 0,805 | 1 |
| Wbp4     | 0,849964 | 0,014054 | 0,559 | 0,569 | 1 |
| Golga3   | 0,850028 | 0,022024 | 0,321 | 0,322 | 1 |
| Cyb5r1   | 0,850056 | 0,012448 | 0,223 | 0,229 | 1 |
| Emc9     | 0,850479 | -0,00956 | 0,281 | 0,283 | 1 |
| Arl3     | 0,850896 | 0,011447 | 0,596 | 0,61  | 1 |
| Cdc26    | 0,850999 | 0,005097 | 0,476 | 0,494 | 1 |
| Tbc1d31  | 0,851116 | 0,00817  | 0,115 | 0,112 | 1 |
| Lgals3   | 0,851116 | 0,049736 | 0,064 | 0,062 | 1 |
| Zfp473   | 0,851116 | 0,005228 | 0,009 | 0,01  | 1 |
| Gm15265  | 0,851373 | 0,002968 | 0,009 | 0,01  | 1 |
| Fam110b  | 0,851373 | 5,69E-05 | 0,009 | 0,01  | 1 |
| Fbxo47   | 0,851373 | 5,69E-05 | 0,009 | 0,01  | 1 |
| 5730507C | 0,851373 | 5,69E-05 | 0,009 | 0,01  | 1 |
| Pnma1    | 0,851373 | 5,69E-05 | 0,009 | 0,01  | 1 |
| R3hdm4   | 0,851468 | 0,001239 | 0,642 | 0,621 | 1 |
| Bcor     | 0,851633 | -0,00044 | 0,248 | 0,254 | 1 |
| Ypel1    | 0,851943 | 0,003127 | 0,061 | 0,063 | 1 |
| Prkcq    | 0,851964 | -0,00931 | 0,429 | 0,428 | 1 |
| Crtc1    | 0,85201  | 0,003889 | 0,131 | 0,135 | 1 |
| Fam173b  | 0,852216 | 0,009558 | 0,2   | 0,207 | 1 |

|          |          |          |       |       |   |
|----------|----------|----------|-------|-------|---|
| Prrg2    | 0,852225 | -0,0041  | 0,154 | 0,158 | 1 |
| Nfe2l3   | 0,852589 | -0,01541 | 0,626 | 0,624 | 1 |
| Nepro    | 0,852719 | -0,0064  | 0,055 | 0,057 | 1 |
| Zfp316   | 0,852752 | 0,002653 | 0,187 | 0,184 | 1 |
| Zfp941   | 0,852764 | -0,00307 | 0,017 | 0,018 | 1 |
| Gm26538  | 0,852914 | 0,003937 | 0,009 | 0,01  | 1 |
| Gm10160  | 0,852914 | 0,001999 | 0,009 | 0,01  | 1 |
| Wnk1     | 0,853141 | 0,006247 | 0,999 | 0,998 | 1 |
| 9630009A | 0,853193 | -3,8E-05 | 0,092 | 0,089 | 1 |
| Gins2    | 0,853305 | 0,007631 | 0,1   | 0,104 | 1 |
| Taf9b    | 0,853357 | 0,004539 | 0,493 | 0,498 | 1 |
| Gstm6    | 0,85341  | 0,00173  | 0,144 | 0,141 | 1 |
| AL591952 | 0,853421 | -0,00508 | 0,037 | 0,039 | 1 |
| Npm1     | 0,853732 | 0,028156 | 0,933 | 0,906 | 1 |
| Ccpg1    | 0,853812 | 0,016636 | 0,307 | 0,304 | 1 |
| Mia2     | 0,853835 | 0,009046 | 0,568 | 0,593 | 1 |
| Shroom3  | 0,853956 | 0,008552 | 0,158 | 0,154 | 1 |
| Otub1    | 0,854045 | 0,001438 | 0,606 | 0,607 | 1 |
| Cdad1    | 0,854323 | -0,00505 | 0,41  | 0,415 | 1 |
| Ap5s1    | 0,854572 | -0,00566 | 0,118 | 0,12  | 1 |
| Zfp322a  | 0,854645 | 0,02038  | 0,208 | 0,215 | 1 |
| Zfp84    | 0,85468  | 0,008489 | 0,199 | 0,205 | 1 |
| Tmem132c | 0,854704 | 0,008263 | 0,077 | 0,08  | 1 |
| Ccdc112  | 0,854741 | 0,01296  | 0,184 | 0,184 | 1 |
| Acvr2a   | 0,854747 | -0,01152 | 0,107 | 0,109 | 1 |
| Hadhb    | 0,854782 | 0,015286 | 0,733 | 0,751 | 1 |
| Zdhc2    | 0,854892 | 0,013285 | 0,047 | 0,046 | 1 |
| Fhit     | 0,854987 | 0,003152 | 0,076 | 0,073 | 1 |
| Map3k4   | 0,855282 | -0,02026 | 0,373 | 0,369 | 1 |
| Spin1    | 0,85534  | -0,01255 | 0,237 | 0,239 | 1 |
| Ftsj3    | 0,855342 | 0,008694 | 0,292 | 0,288 | 1 |
| Upf2     | 0,855392 | 0,006425 | 0,459 | 0,481 | 1 |
| Zfp846   | 0,855511 | 0,012302 | 0,205 | 0,203 | 1 |
| Bin3     | 0,855572 | -0,00226 | 0,172 | 0,176 | 1 |
| Gm11508  | 0,855773 | 0,002072 | 0,025 | 0,026 | 1 |
| Zfp414   | 0,855809 | 0,019415 | 0,253 | 0,252 | 1 |
| Papd4    | 0,85583  | 0,017677 | 0,302 | 0,304 | 1 |
| Rad54l   | 0,855979 | -0,0006  | 0,045 | 0,047 | 1 |
| Nuak2    | 0,855998 | 0,002968 | 0,009 | 0,01  | 1 |
| Gm31763  | 0,855998 | 0,002968 | 0,009 | 0,01  | 1 |
| Fam120a  | 0,856249 | 0,013914 | 0,612 | 0,595 | 1 |
| Sec31a   | 0,856407 | 0,006641 | 0,456 | 0,47  | 1 |
| Ncbp1    | 0,856505 | 0,01455  | 0,254 | 0,254 | 1 |
| Auts2    | 0,85651  | 0,012055 | 0,645 | 0,65  | 1 |
| Xrn2     | 0,856981 | 0,022775 | 0,515 | 0,52  | 1 |
| Gpr155   | 0,85706  | 0,003183 | 0,644 | 0,663 | 1 |
| Rps6kb2  | 0,857173 | 0,016382 | 0,224 | 0,224 | 1 |
| Sympk    | 0,857284 | -0,01484 | 0,521 | 0,527 | 1 |
| Mettl8   | 0,857312 | 0,00614  | 0,169 | 0,174 | 1 |
| Mon2     | 0,857314 | 0,002489 | 0,693 | 0,696 | 1 |
| Nol7     | 0,857654 | 0,016507 | 0,803 | 0,784 | 1 |
| Gtdc1    | 0,858211 | 0,020912 | 0,237 | 0,237 | 1 |

|           |          |          |       |       |   |
|-----------|----------|----------|-------|-------|---|
| Mastl     | 0,858223 | -0,00502 | 0,042 | 0,044 | 1 |
| Tmco4     | 0,858321 | 0,003973 | 0,027 | 0,026 | 1 |
| Pes1      | 0,858569 | 0,001034 | 0,28  | 0,275 | 1 |
| Spns2     | 0,858822 | 0,015878 | 0,591 | 0,59  | 1 |
| Ttc9c     | 0,85896  | 0,013117 | 0,272 | 0,27  | 1 |
| Syk       | 0,858997 | 0,005231 | 0,016 | 0,015 | 1 |
| Kcnk1     | 0,859009 | 0,000274 | 0,045 | 0,047 | 1 |
| Hspa14    | 0,859032 | 0,021085 | 0,314 | 0,319 | 1 |
| Rin2      | 0,859067 | 0,031072 | 0,256 | 0,26  | 1 |
| Eif2s1    | 0,859137 | 0,016738 | 0,476 | 0,48  | 1 |
| Bloc1s5   | 0,859187 | 0,022628 | 0,25  | 0,252 | 1 |
| Arhgap20  | 0,859226 | 0,002395 | 0,025 | 0,026 | 1 |
| Dynlt1b   | 0,859596 | 0,004909 | 0,016 | 0,015 | 1 |
| CAA011118 | 0,859815 | 0,005871 | 0,264 | 0,27  | 1 |
| 1810009A  | 0,859892 | 0,001825 | 0,044 | 0,042 | 1 |
| Gpr62     | 0,860169 | -0,01048 | 0,884 | 0,889 | 1 |
| Arrb1     | 0,860264 | 0,015536 | 0,062 | 0,065 | 1 |
| Nova2     | 0,86032  | 0,000746 | 0,017 | 0,018 | 1 |
| Rgs12     | 0,860476 | 0,001424 | 0,025 | 0,026 | 1 |
| Ldb1      | 0,860555 | 0,025325 | 0,298 | 0,304 | 1 |
| Lmbr1l    | 0,86057  | 0,003782 | 0,085 | 0,083 | 1 |
| Gm29562   | 0,860597 | 0,005231 | 0,016 | 0,015 | 1 |
| Pank4     | 0,86061  | 0,015474 | 0,109 | 0,107 | 1 |
| Brd4      | 0,860613 | 0,016758 | 0,636 | 0,668 | 1 |
| Lrfn4     | 0,860792 | 0,007624 | 0,098 | 0,096 | 1 |
| Cog7      | 0,861147 | 0,004742 | 0,327 | 0,333 | 1 |
| Rpp14     | 0,861203 | -0,01174 | 0,275 | 0,275 | 1 |
| Lrat      | 0,861395 | 0,003946 | 0,016 | 0,015 | 1 |
| Ccs       | 0,861412 | -0,00299 | 0,447 | 0,437 | 1 |
| Zbtb38    | 0,86151  | -0,00415 | 0,825 | 0,824 | 1 |
| Slc35e3   | 0,861561 | 0,007971 | 0,206 | 0,203 | 1 |
| Snx11     | 0,861572 | 0,029846 | 0,278 | 0,293 | 1 |
| Bcan      | 0,861646 | 0,005871 | 0,017 | 0,018 | 1 |
| Tmem14c   | 0,861696 | 0,010073 | 0,664 | 0,68  | 1 |
| Gm17056   | 0,8618   | -0,01335 | 0,023 | 0,021 | 1 |
| Agtrap    | 0,861821 | 0,002611 | 0,09  | 0,088 | 1 |
| Thrb      | 0,861835 | 0,003955 | 0,017 | 0,018 | 1 |
| Zfp513    | 0,86201  | -0,00156 | 0,161 | 0,156 | 1 |
| Vapb      | 0,862078 | -0,00635 | 0,59  | 0,595 | 1 |
| Fam241b   | 0,862213 | 0,002886 | 0,09  | 0,088 | 1 |
| Abt1      | 0,862287 | 0,000573 | 0,203 | 0,208 | 1 |
| Aldh18a1  | 0,862402 | 0,001709 | 0,017 | 0,018 | 1 |
| Dnajc5    | 0,862507 | 0,012399 | 0,546 | 0,545 | 1 |
| Med30     | 0,862526 | -0,00195 | 0,579 | 0,597 | 1 |
| Ankrd46   | 0,862591 | 0,011917 | 0,688 | 0,707 | 1 |
| Npc1      | 0,862615 | 0,016141 | 0,991 | 0,987 | 1 |
| Endov     | 0,862783 | -0,00444 | 0,124 | 0,127 | 1 |
| Syt3      | 0,863156 | 0,003115 | 0,054 | 0,052 | 1 |
| Usp50     | 0,86319  | -0,01029 | 0,26  | 0,262 | 1 |
| Mtmr3     | 0,86321  | 0,020072 | 0,305 | 0,307 | 1 |
| Gm5602    | 0,863349 | 0,002036 | 0,017 | 0,018 | 1 |
| Cryab     | 0,863671 | 0,002728 | 0,999 | 1     | 1 |



|           |          |          |       |       |   |
|-----------|----------|----------|-------|-------|---|
| Cfl1      | 0,863919 | 0,006365 | 0,999 | 1     | 1 |
| Sacm1l    | 0,863968 | 0,009399 | 0,411 | 0,423 | 1 |
| Dhx35     | 0,864016 | 0,001567 | 0,05  | 0,052 | 1 |
| Zfp148    | 0,864112 | 0,020432 | 0,515 | 0,53  | 1 |
| Tefm      | 0,864194 | 0,000737 | 0,071 | 0,073 | 1 |
| Aim2      | 0,864397 | 0,002345 | 0,016 | 0,015 | 1 |
| Gm26516   | 0,864484 | 0,002671 | 0,017 | 0,018 | 1 |
| Bend3     | 0,864484 | 0,002671 | 0,017 | 0,018 | 1 |
| Trpt1     | 0,864614 | 0,001084 | 0,136 | 0,14  | 1 |
| Rab11fip3 | 0,864683 | 0,009025 | 0,273 | 0,28  | 1 |
| Tmc6      | 0,864755 | 0,003583 | 0,317 | 0,324 | 1 |
| Gm32856   | 0,865029 | 0,001143 | 0,029 | 0,031 | 1 |
| Prkaca    | 0,865062 | 0,007947 | 0,559 | 0,569 | 1 |
| Zfp39     | 0,865075 | 0,004616 | 0,037 | 0,036 | 1 |
| 9930104LC | 0,865098 | -5,4E-05 | 0,135 | 0,138 | 1 |
| Ramp2     | 0,865198 | 0,002671 | 0,016 | 0,015 | 1 |
| Top3b     | 0,86524  | 0,021084 | 0,292 | 0,294 | 1 |
| Sbf1      | 0,86557  | -0,00098 | 0,864 | 0,88  | 1 |
| Cep164    | 0,865637 | 0,012443 | 0,266 | 0,265 | 1 |
| Keap1     | 0,865651 | -0,00515 | 0,465 | 0,459 | 1 |
| Dhx29     | 0,865723 | 0,002859 | 0,237 | 0,234 | 1 |
| Eif3k     | 0,865806 | 0,008503 | 0,892 | 0,876 | 1 |
| Ercc5     | 0,866168 | 0,013683 | 0,197 | 0,195 | 1 |
| Zfp710    | 0,866317 | 0,005047 | 0,161 | 0,158 | 1 |
| Mam1d1    | 0,866321 | 0,012547 | 0,021 | 0,02  | 1 |
| Cs        | 0,866372 | 0,006375 | 0,578 | 0,579 | 1 |
| Nphp1     | 0,866388 | 0,001397 | 0,08  | 0,078 | 1 |
| Trmu      | 0,866424 | -0,00495 | 0,132 | 0,128 | 1 |
| Gtf3c5    | 0,866441 | 0,004022 | 0,197 | 0,195 | 1 |
| Evi5      | 0,866503 | 0,002611 | 0,079 | 0,081 | 1 |
| Ccdc6     | 0,866557 | 0,005611 | 0,206 | 0,211 | 1 |
| A230107N  | 0,866598 | -0,00118 | 0,016 | 0,015 | 1 |
| Ccdc94    | 0,866741 | 0,000851 | 0,093 | 0,096 | 1 |
| Zfp36l1   | 0,866846 | 0,009983 | 0,021 | 0,02  | 1 |
| Vps39     | 0,866965 | -0,00623 | 0,256 | 0,259 | 1 |
| Ift80     | 0,86697  | 0,011363 | 0,238 | 0,246 | 1 |
| Ly6g6e    | 0,867014 | -0,00387 | 0,078 | 0,08  | 1 |
| P3h3      | 0,8672   | -0,03149 | 0,016 | 0,015 | 1 |
| Rnft2     | 0,867288 | 0,00014  | 0,076 | 0,078 | 1 |
| Rpl7l1    | 0,867418 | 0,014482 | 0,385 | 0,4   | 1 |
| Marveld1  | 0,867419 | 0,001768 | 0,032 | 0,031 | 1 |
| Tm9sf4    | 0,867814 | 0,008335 | 0,45  | 0,463 | 1 |
| Col1a2    | 0,868207 | -0,02854 | 0,103 | 0,099 | 1 |
| Gatad2a   | 0,868263 | 0,016556 | 0,452 | 0,46  | 1 |
| Ube2d3    | 0,868309 | 0,008168 | 0,964 | 0,958 | 1 |
| Gm5148    | 0,86844  | 0,012034 | 0,052 | 0,05  | 1 |
| Blm       | 0,868569 | -0,00138 | 0,104 | 0,101 | 1 |
| Pole3     | 0,868687 | -0,0013  | 0,373 | 0,382 | 1 |
| Gpx1      | 0,868709 | 0,056697 | 0,206 | 0,213 | 1 |
| 6030443JC | 0,868729 | 0,003356 | 0,037 | 0,036 | 1 |
| Dguok     | 0,869035 | 0,028993 | 0,467 | 0,48  | 1 |
| Mfsd10    | 0,869397 | 0,008389 | 0,145 | 0,143 | 1 |

|            |          |          |       |       |   |
|------------|----------|----------|-------|-------|---|
| Gm26881    | 0,86941  | -0,00111 | 0,068 | 0,07  | 1 |
| Lrrc41     | 0,869464 | 0,012302 | 0,271 | 0,281 | 1 |
| Fndc10     | 0,869691 | 0,001881 | 0,059 | 0,057 | 1 |
| Gm38642    | 0,869723 | 0,004585 | 0,192 | 0,189 | 1 |
| Pwp2       | 0,869765 | -0,00529 | 0,1   | 0,102 | 1 |
| Zfp970     | 0,869816 | 0,008098 | 0,021 | 0,02  | 1 |
| Zfp729b    | 0,870063 | 0,004506 | 0,162 | 0,166 | 1 |
| Dip2c      | 0,87011  | 0,013457 | 0,402 | 0,402 | 1 |
| Cdipt      | 0,870287 | 0,005015 | 0,365 | 0,371 | 1 |
| Etf1       | 0,870446 | 0,022481 | 0,451 | 0,463 | 1 |
| Erlin2     | 0,870598 | 0,010779 | 0,37  | 0,38  | 1 |
| Fkbp14     | 0,870737 | -0,00396 | 0,11  | 0,112 | 1 |
| Jcad       | 0,870739 | -0,00871 | 0,07  | 0,072 | 1 |
| Zfp68      | 0,870802 | -0,00206 | 0,336 | 0,33  | 1 |
| Ovca2      | 0,870803 | 0,001567 | 0,055 | 0,057 | 1 |
| Rbm15b     | 0,870861 | 0,010762 | 0,217 | 0,213 | 1 |
| Tmem120a   | 0,871062 | 0,003686 | 0,165 | 0,169 | 1 |
| Utp14a     | 0,871149 | 8,05E-05 | 0,299 | 0,304 | 1 |
| Nkx2-2os   | 0,871511 | 0,000544 | 0,034 | 0,036 | 1 |
| Zswim5     | 0,871515 | -0,00013 | 0,029 | 0,031 | 1 |
| Ppp2cb     | 0,871581 | -0,00344 | 0,263 | 0,257 | 1 |
| Kansl3     | 0,871732 | 0,010806 | 0,305 | 0,302 | 1 |
| Cdkn2c     | 0,871859 | -0,00322 | 0,066 | 0,063 | 1 |
| Wwp2       | 0,871871 | 0,008705 | 0,351 | 0,356 | 1 |
| Hnrnp2     | 0,872019 | 0,002076 | 0,771 | 0,767 | 1 |
| Cisd2      | 0,872285 | 0,012386 | 0,657 | 0,688 | 1 |
| Mcl1       | 0,872635 | 0,016892 | 0,716 | 0,722 | 1 |
| Gm12525    | 0,872657 | 0,00305  | 0,037 | 0,036 | 1 |
| Gm15860    | 0,872715 | -0,00513 | 0,034 | 0,036 | 1 |
| Proser1    | 0,872828 | 0,004609 | 0,237 | 0,233 | 1 |
| Krba1      | 0,872828 | -9,3E-05 | 0,169 | 0,166 | 1 |
| Il11       | 0,872855 | 0,007712 | 0,057 | 0,055 | 1 |
| Hjulp      | 0,87286  | -0,00149 | 0,334 | 0,34  | 1 |
| Fbxo42     | 0,872929 | 0,002446 | 0,124 | 0,127 | 1 |
| Slc39a9    | 0,873067 | 0,009602 | 0,308 | 0,315 | 1 |
| Mtm1       | 0,873145 | 0,006786 | 0,314 | 0,32  | 1 |
| Fam168b    | 0,873293 | -0,01567 | 0,409 | 0,416 | 1 |
| Fbxo11     | 0,87332  | 0,01273  | 0,426 | 0,439 | 1 |
| Pak1ip1    | 0,873344 | -0,00902 | 0,397 | 0,402 | 1 |
| Rpl13a-ps1 | 0,87335  | -0,00145 | 0,022 | 0,023 | 1 |
| Rhbdd2     | 0,873586 | -0,00171 | 0,299 | 0,302 | 1 |
| Gm14322    | 0,8737   | 0,001787 | 0,037 | 0,036 | 1 |
| Sbsn       | 0,873756 | 0,010336 | 0,153 | 0,151 | 1 |
| Tmcc2      | 0,873833 | -0,00244 | 0,896 | 0,912 | 1 |
| Trmt61a    | 0,873943 | 0,004115 | 0,099 | 0,102 | 1 |
| Atad5      | 0,874054 | 0,007904 | 0,099 | 0,102 | 1 |
| Sirt6      | 0,874279 | 0,001064 | 0,136 | 0,14  | 1 |
| Oxsr1      | 0,874416 | 0,022462 | 0,22  | 0,221 | 1 |
| Gm13594    | 0,874451 | -0,00156 | 0,049 | 0,047 | 1 |
| Kdm1b      | 0,87464  | 0,00416  | 0,126 | 0,124 | 1 |
| Tmem68     | 0,874688 | 0,010176 | 0,24  | 0,239 | 1 |
| Slc25a53   | 0,875258 | -0,00178 | 0,06  | 0,062 | 1 |

|            |          |          |       |       |   |
|------------|----------|----------|-------|-------|---|
| Ect2       | 0,875543 | -0,00223 | 0,006 | 0,007 | 1 |
| Mov10      | 0,875543 | -0,00223 | 0,006 | 0,007 | 1 |
| Gm17529    | 0,875543 | -0,00223 | 0,006 | 0,007 | 1 |
| Lrtm2      | 0,875568 | 0,007138 | 0,026 | 0,024 | 1 |
| Atp5l      | 0,875672 | 0,002213 | 0,978 | 0,982 | 1 |
| Mrgbp      | 0,875815 | 0,007947 | 0,214 | 0,22  | 1 |
| Nsun2      | 0,875847 | 0,014397 | 0,422 | 0,429 | 1 |
| Arhgef37   | 0,875897 | -0,00086 | 0,059 | 0,057 | 1 |
| Scn2a      | 0,875954 | -0,0046  | 0,049 | 0,047 | 1 |
| Cdh8       | 0,876057 | 0,013554 | 0,183 | 0,18  | 1 |
| Wdr74      | 0,876065 | -0,00632 | 0,234 | 0,236 | 1 |
| Relt       | 0,876595 | -0,00872 | 0,044 | 0,046 | 1 |
| Rpl36a-ps1 | 0,876704 | -0,00082 | 0,022 | 0,023 | 1 |
| Pcolce     | 0,876806 | -0,00125 | 0,006 | 0,007 | 1 |
| Fbxl22     | 0,876806 | -0,00125 | 0,006 | 0,007 | 1 |
| Carmil1    | 0,876806 | -0,00125 | 0,006 | 0,007 | 1 |
| Lefty1     | 0,876808 | 0,002682 | 0,096 | 0,099 | 1 |
| Hnrnpk     | 0,877005 | 0,015771 | 0,996 | 1     | 1 |
| Atcayos    | 0,87705  | 0,002293 | 0,002 | 0,002 | 1 |
| Pithd1     | 0,87706  | -0,00556 | 0,702 | 0,701 | 1 |
| Il6ra      | 0,877122 | 0,000696 | 0,006 | 0,007 | 1 |
| Slc18a2    | 0,877122 | -0,00028 | 0,006 | 0,007 | 1 |
| Armcx2     | 0,877218 | 0,005061 | 0,178 | 0,174 | 1 |
| Gm15577    | 0,877438 | -0,00061 | 0,006 | 0,007 | 1 |
| Gm44264    | 0,877438 | -0,00061 | 0,006 | 0,007 | 1 |
| Gm44700    | 0,877438 | -0,00061 | 0,006 | 0,007 | 1 |
| Gm45799    | 0,877438 | -0,00061 | 0,006 | 0,007 | 1 |
| Gm11175    | 0,877438 | -0,00061 | 0,006 | 0,007 | 1 |
| Gm10642    | 0,877438 | -0,00061 | 0,006 | 0,007 | 1 |
| Olf318     | 0,877438 | -0,00061 | 0,006 | 0,007 | 1 |
| Arhgap27   | 0,877438 | -0,00061 | 0,006 | 0,007 | 1 |
| Cdhr2      | 0,877438 | -0,00061 | 0,006 | 0,007 | 1 |
| Zfp457     | 0,877438 | -0,00061 | 0,006 | 0,007 | 1 |
| Gm48610    | 0,877438 | -0,00061 | 0,006 | 0,007 | 1 |
| AC113595.  | 0,877438 | -0,00061 | 0,006 | 0,007 | 1 |
| Gm26749    | 0,877438 | -0,00061 | 0,006 | 0,007 | 1 |
| Slc15a3    | 0,877438 | -0,00061 | 0,006 | 0,007 | 1 |
| Frdm3      | 0,877626 | 0,005221 | 0,002 | 0,002 | 1 |
| 6030419C:  | 0,877626 | 0,004246 | 0,002 | 0,002 | 1 |
| Col14a1    | 0,877626 | 0,00327  | 0,002 | 0,002 | 1 |
| Fgl1       | 0,877626 | 0,002293 | 0,002 | 0,002 | 1 |
| Sncg       | 0,877626 | 0,002293 | 0,002 | 0,002 | 1 |
| Arg2       | 0,877626 | 0,002293 | 0,002 | 0,002 | 1 |
| Fsbp       | 0,877626 | 0,001315 | 0,002 | 0,002 | 1 |
| Orc1       | 0,877626 | 0,001315 | 0,002 | 0,002 | 1 |
| Artn       | 0,877626 | 0,001315 | 0,002 | 0,002 | 1 |
| Prom1      | 0,877626 | 0,001315 | 0,002 | 0,002 | 1 |
| Ncf1       | 0,877626 | 0,001315 | 0,002 | 0,002 | 1 |
| Fam174b    | 0,877626 | 0,001315 | 0,002 | 0,002 | 1 |
| Ctsc       | 0,877626 | 0,001315 | 0,002 | 0,002 | 1 |
| Ascl2      | 0,877626 | 0,001315 | 0,002 | 0,002 | 1 |
| Cnn2       | 0,877626 | 0,001315 | 0,002 | 0,002 | 1 |

|           |          |          |       |       |   |
|-----------|----------|----------|-------|-------|---|
| Rmst      | 0,877626 | 0,001315 | 0,002 | 0,002 | 1 |
| Lrriq1    | 0,877626 | 0,001315 | 0,002 | 0,002 | 1 |
| Arhgap10  | 0,877626 | 0,001315 | 0,002 | 0,002 | 1 |
| Tbc1d9    | 0,877626 | 0,001315 | 0,002 | 0,002 | 1 |
| Plod2     | 0,877626 | 0,001315 | 0,002 | 0,002 | 1 |
| Myt1l     | 0,877626 | 0,001315 | 0,002 | 0,002 | 1 |
| Mis18bp1  | 0,877626 | 0,001315 | 0,002 | 0,002 | 1 |
| Lrr1      | 0,877626 | 0,001315 | 0,002 | 0,002 | 1 |
| Efcab1    | 0,877626 | 0,001315 | 0,002 | 0,002 | 1 |
| Syt7      | 0,877626 | 0,001315 | 0,002 | 0,002 | 1 |
| Gm35339   | 0,877699 | 0,00361  | 0,009 | 0,008 | 1 |
| Gm30074   | 0,877699 | 0,005548 | 0,009 | 0,008 | 1 |
| Ahnak2    | 0,8777   | 0,014834 | 0,009 | 0,008 | 1 |
| Thoc6     | 0,877863 | 0,021256 | 0,227 | 0,226 | 1 |
| Cyfip1    | 0,877948 | 0,021292 | 0,538 | 0,564 | 1 |
| Vmn1r81   | 0,87807  | -0,00028 | 0,006 | 0,007 | 1 |
| Doc2g     | 0,87807  | 5,69E-05 | 0,006 | 0,007 | 1 |
| Get4      | 0,878094 | 0,010366 | 0,595 | 0,59  | 1 |
| Naa10     | 0,878135 | -0,00563 | 0,312 | 0,302 | 1 |
| Otos      | 0,878201 | 0,000336 | 0,002 | 0,002 | 1 |
| Ptpn7     | 0,878201 | 0,000336 | 0,002 | 0,002 | 1 |
| Arhgap30  | 0,878201 | 0,000336 | 0,002 | 0,002 | 1 |
| Camk1d    | 0,878201 | 0,000336 | 0,002 | 0,002 | 1 |
| Sfmbt2    | 0,878201 | 0,000336 | 0,002 | 0,002 | 1 |
| Entpd2    | 0,878201 | 0,000336 | 0,002 | 0,002 | 1 |
| Egfl7     | 0,878201 | 0,000336 | 0,002 | 0,002 | 1 |
| Scn1a     | 0,878201 | 0,000336 | 0,002 | 0,002 | 1 |
| Chrna1os  | 0,878201 | 0,000336 | 0,002 | 0,002 | 1 |
| Cst7      | 0,878201 | 0,000336 | 0,002 | 0,002 | 1 |
| Ube2c     | 0,878201 | 0,000336 | 0,002 | 0,002 | 1 |
| 2010308Fc | 0,878201 | 0,000336 | 0,002 | 0,002 | 1 |
| Gpr160    | 0,878201 | 0,000336 | 0,002 | 0,002 | 1 |
| Crabp2    | 0,878201 | 0,000336 | 0,002 | 0,002 | 1 |
| Ankrd34a  | 0,878201 | 0,000336 | 0,002 | 0,002 | 1 |
| Ngf       | 0,878201 | 0,000336 | 0,002 | 0,002 | 1 |
| Ptpn22    | 0,878201 | 0,000336 | 0,002 | 0,002 | 1 |
| Alpk1     | 0,878201 | 0,000336 | 0,002 | 0,002 | 1 |
| B230334C  | 0,878201 | 0,000336 | 0,002 | 0,002 | 1 |
| Lrrc7     | 0,878201 | 0,000336 | 0,002 | 0,002 | 1 |
| Phf24     | 0,878201 | 0,000336 | 0,002 | 0,002 | 1 |
| Bend5     | 0,878201 | 0,000336 | 0,002 | 0,002 | 1 |
| Hpca      | 0,878201 | 0,000336 | 0,002 | 0,002 | 1 |
| Gabra4    | 0,878201 | 0,000336 | 0,002 | 0,002 | 1 |
| Gm10419   | 0,878201 | 0,000336 | 0,002 | 0,002 | 1 |
| Myo1h     | 0,878201 | 0,000336 | 0,002 | 0,002 | 1 |
| Cd8b1     | 0,878201 | 0,000336 | 0,002 | 0,002 | 1 |
| Lrrtm4    | 0,878201 | 0,000336 | 0,002 | 0,002 | 1 |
| Fbxo41    | 0,878201 | 0,000336 | 0,002 | 0,002 | 1 |
| Gm26588   | 0,878201 | 0,000336 | 0,002 | 0,002 | 1 |
| Catsperg1 | 0,878201 | 0,000336 | 0,002 | 0,002 | 1 |
| Mir9-3hg  | 0,878201 | 0,000336 | 0,002 | 0,002 | 1 |
| Trim34a   | 0,878201 | 0,000336 | 0,002 | 0,002 | 1 |

|           |          |          |       |       |   |
|-----------|----------|----------|-------|-------|---|
| Mical2    | 0,878201 | 0,000336 | 0,002 | 0,002 | 1 |
| Abrac1    | 0,878201 | 0,000336 | 0,002 | 0,002 | 1 |
| Mtfr2     | 0,878201 | 0,000336 | 0,002 | 0,002 | 1 |
| Lyz1      | 0,878201 | 0,000336 | 0,002 | 0,002 | 1 |
| Neil3     | 0,878201 | 0,000336 | 0,002 | 0,002 | 1 |
| Trim67    | 0,878201 | 0,000336 | 0,002 | 0,002 | 1 |
| Vstm4     | 0,878201 | 0,000336 | 0,002 | 0,002 | 1 |
| Sox21     | 0,878201 | 0,000336 | 0,002 | 0,002 | 1 |
| AB124611  | 0,878201 | 0,000336 | 0,002 | 0,002 | 1 |
| Glb1l2    | 0,878201 | 0,000336 | 0,002 | 0,002 | 1 |
| Olfr986   | 0,878201 | 0,000336 | 0,002 | 0,002 | 1 |
| Osbpl10   | 0,878201 | 0,000336 | 0,002 | 0,002 | 1 |
| Rilp      | 0,878201 | 0,000336 | 0,002 | 0,002 | 1 |
| Tom1l1    | 0,878201 | 0,000336 | 0,002 | 0,002 | 1 |
| Gm28707   | 0,878201 | 0,000336 | 0,002 | 0,002 | 1 |
| Adcy2     | 0,878201 | 0,000336 | 0,002 | 0,002 | 1 |
| Gm17750   | 0,878201 | 0,000336 | 0,002 | 0,002 | 1 |
| Sptb      | 0,878201 | 0,000336 | 0,002 | 0,002 | 1 |
| Noxred1   | 0,878201 | 0,000336 | 0,002 | 0,002 | 1 |
| Chga      | 0,878201 | 0,000336 | 0,002 | 0,002 | 1 |
| Ighm      | 0,878201 | 0,000336 | 0,002 | 0,002 | 1 |
| Mapk12    | 0,878201 | 0,000336 | 0,002 | 0,002 | 1 |
| Nckap1l   | 0,878201 | 0,000336 | 0,002 | 0,002 | 1 |
| Glis2     | 0,878201 | 0,000336 | 0,002 | 0,002 | 1 |
| Vav1      | 0,878201 | 0,000336 | 0,002 | 0,002 | 1 |
| Vit       | 0,878201 | 0,000336 | 0,002 | 0,002 | 1 |
| Arhgef33  | 0,878201 | 0,000336 | 0,002 | 0,002 | 1 |
| Nol4      | 0,878201 | 0,000336 | 0,002 | 0,002 | 1 |
| Kcnn2     | 0,878201 | 0,000336 | 0,002 | 0,002 | 1 |
| Mro       | 0,878201 | 0,000336 | 0,002 | 0,002 | 1 |
| Pcsk5     | 0,878201 | 0,000336 | 0,002 | 0,002 | 1 |
| Ablim1    | 0,878201 | 0,000336 | 0,002 | 0,002 | 1 |
| Rps15a    | 0,878395 | -0,00834 | 0,982 | 0,992 | 1 |
| Pink1     | 0,878484 | 0,01636  | 0,813 | 0,811 | 1 |
| Srr       | 0,878508 | -0,0031  | 0,223 | 0,226 | 1 |
| Nxf2      | 0,878701 | 0,00231  | 0,006 | 0,007 | 1 |
| Olfr1238  | 0,878701 | 0,000363 | 0,006 | 0,007 | 1 |
| Gm26617   | 0,878701 | 0,000363 | 0,006 | 0,007 | 1 |
| Prkcd     | 0,878701 | 0,000363 | 0,006 | 0,007 | 1 |
| Gm11940   | 0,878701 | 0,000363 | 0,006 | 0,007 | 1 |
| Rab3c     | 0,878701 | 0,000363 | 0,006 | 0,007 | 1 |
| Serpina3m | 0,878701 | 0,000363 | 0,006 | 0,007 | 1 |
| Hmcn1     | 0,878777 | -0,00031 | 0,002 | 0,002 | 1 |
| Trak1     | 0,878784 | 0,012356 | 0,136 | 0,135 | 1 |
| Eftud2    | 0,878926 | 0,014889 | 0,313 | 0,32  | 1 |
| Gm20075   | 0,879036 | 0,00264  | 0,009 | 0,008 | 1 |
| Ctla2a    | 0,879036 | 0,006516 | 0,009 | 0,008 | 1 |
| Eps8l2    | 0,879036 | 0,00361  | 0,009 | 0,008 | 1 |
| Fam227a   | 0,879222 | 0,001098 | 0,022 | 0,023 | 1 |
| A830018L1 | 0,879352 | -0,00129 | 0,002 | 0,002 | 1 |
| 1700003F1 | 0,879352 | -0,00129 | 0,002 | 0,002 | 1 |
| Prdm16    | 0,879352 | -0,00129 | 0,002 | 0,002 | 1 |

|           |          |          |       |       |   |
|-----------|----------|----------|-------|-------|---|
| Ccnb2     | 0,879352 | -0,00129 | 0,002 | 0,002 | 1 |
| Rasd1     | 0,879352 | -0,00129 | 0,002 | 0,002 | 1 |
| Slc16a11  | 0,879352 | -0,00129 | 0,002 | 0,002 | 1 |
| Aif1      | 0,879352 | -0,00129 | 0,002 | 0,002 | 1 |
| Celf3     | 0,879352 | -0,00291 | 0,002 | 0,002 | 1 |
| Plppr1    | 0,879352 | -0,00291 | 0,002 | 0,002 | 1 |
| Chrd      | 0,879352 | -0,00291 | 0,002 | 0,002 | 1 |
| Pdp1      | 0,879395 | 0,001606 | 0,13  | 0,127 | 1 |
| Atxn2l    | 0,879446 | 0,021987 | 0,605 | 0,611 | 1 |
| Fem1a     | 0,879488 | 0,00396  | 0,284 | 0,288 | 1 |
| Coa6      | 0,879735 | 0,007017 | 0,332 | 0,328 | 1 |
| Ccdc96    | 0,879838 | 0,002968 | 0,009 | 0,008 | 1 |
| Myh6      | 0,879965 | 0,001337 | 0,006 | 0,007 | 1 |
| Dpf3      | 0,879965 | 0,001337 | 0,006 | 0,007 | 1 |
| Setd4     | 0,880093 | 0,005251 | 0,047 | 0,046 | 1 |
| Dis3l     | 0,880202 | -0,0053  | 0,192 | 0,187 | 1 |
| Axin2     | 0,880287 | 0,007968 | 0,079 | 0,081 | 1 |
| Gm28043   | 0,880372 | 0,00264  | 0,009 | 0,008 | 1 |
| Gm17092   | 0,880372 | 0,001668 | 0,009 | 0,008 | 1 |
| Dynlrb2   | 0,880372 | 0,001668 | 0,009 | 0,008 | 1 |
| 2410021H  | 0,880372 | 0,001668 | 0,009 | 0,008 | 1 |
| Raver1    | 0,88049  | 0,000442 | 0,021 | 0,02  | 1 |
| Mcm2      | 0,880581 | 0,00381  | 0,096 | 0,099 | 1 |
| Faf2      | 0,8806   | 0,009807 | 0,497 | 0,511 | 1 |
| Bbs1      | 0,880684 | -0,00178 | 0,09  | 0,093 | 1 |
| Tulp3     | 0,880813 | 0,005515 | 0,349 | 0,351 | 1 |
| Abcc10    | 0,880814 | 0,010925 | 0,081 | 0,085 | 1 |
| Immt      | 0,881028 | 0,016009 | 0,791 | 0,795 | 1 |
| Eif4h     | 0,881175 | -0,00844 | 0,985 | 0,99  | 1 |
| Casp3     | 0,881588 | 0,000913 | 0,039 | 0,041 | 1 |
| Tram111   | 0,881593 | -0,00168 | 0,071 | 0,068 | 1 |
| Mcm6      | 0,881595 | -0,00554 | 0,07  | 0,072 | 1 |
| Hnrnpul1  | 0,881596 | 0,026648 | 0,615 | 0,61  | 1 |
| Smyd1     | 0,881709 | 0,000696 | 0,009 | 0,008 | 1 |
| Agap2     | 0,881709 | 0,000696 | 0,009 | 0,008 | 1 |
| Sez6      | 0,881709 | 0,000696 | 0,009 | 0,008 | 1 |
| Pxdc1     | 0,881709 | 0,000696 | 0,009 | 0,008 | 1 |
| Olfr775   | 0,881736 | -0,00118 | 0,014 | 0,015 | 1 |
| Primpol   | 0,881768 | 0,007765 | 0,03  | 0,029 | 1 |
| Ptar1     | 0,881894 | 0,007572 | 0,135 | 0,133 | 1 |
| Gorasp1   | 0,881929 | 0,002889 | 0,177 | 0,18  | 1 |
| Rpp25     | 0,881977 | -0,00058 | 0,009 | 0,008 | 1 |
| Slc4a7    | 0,882166 | 0,002504 | 0,124 | 0,127 | 1 |
| Ccdc181   | 0,882208 | 0,006451 | 0,109 | 0,112 | 1 |
| Tmem8b    | 0,882461 | 0,012403 | 0,204 | 0,21  | 1 |
| Zc3hc1    | 0,882522 | 0,001222 | 0,172 | 0,169 | 1 |
| Cyp4f14   | 0,882533 | 0,004662 | 0,072 | 0,07  | 1 |
| Mpnd      | 0,882696 | -0,01431 | 0,404 | 0,403 | 1 |
| C030047K  | 0,88278  | 5,69E-05 | 0,009 | 0,008 | 1 |
| A430105JC | 0,882782 | -0,00055 | 0,014 | 0,015 | 1 |
| Wdr25     | 0,882783 | -0,00394 | 0,026 | 0,028 | 1 |
| Uhrf1bp1l | 0,883324 | 0,009995 | 0,142 | 0,146 | 1 |

|           |          |          |       |       |   |
|-----------|----------|----------|-------|-------|---|
| Aebp1     | 0,883617 | -0,01476 | 0,321 | 0,314 | 1 |
| Olfr1160  | 0,883827 | 8,49E-05 | 0,014 | 0,015 | 1 |
| Prkag3    | 0,883925 | 0,003964 | 0,022 | 0,023 | 1 |
| Plxna3    | 0,883947 | -0,00234 | 0,06  | 0,062 | 1 |
| 2810001G  | 0,884008 | -0,00479 | 0,117 | 0,119 | 1 |
| Palb2     | 0,884171 | -0,00115 | 0,021 | 0,02  | 1 |
| Trim35    | 0,884543 | 0,006529 | 0,97  | 0,969 | 1 |
| Casz1     | 0,884549 | 0,002701 | 0,026 | 0,024 | 1 |
| Alyref    | 0,884584 | -0,00561 | 0,638 | 0,642 | 1 |
| Inpp5e    | 0,884618 | 0,005005 | 0,113 | 0,111 | 1 |
| Dclk2     | 0,884717 | -0,004   | 0,1   | 0,098 | 1 |
| Cfap36    | 0,884894 | 0,001577 | 0,625 | 0,636 | 1 |
| Ppfia2    | 0,885339 | -0,00386 | 0,062 | 0,063 | 1 |
| Pycrl     | 0,885567 | -0,01147 | 0,209 | 0,21  | 1 |
| Trmt2b    | 0,885586 | -0,01138 | 0,192 | 0,193 | 1 |
| Scrn3     | 0,885623 | -0,00324 | 0,286 | 0,291 | 1 |
| Gm45890   | 0,885712 | 0,001052 | 0,014 | 0,015 | 1 |
| E130114P1 | 0,885712 | 0,002017 | 0,014 | 0,015 | 1 |
| AL732506  | 0,885991 | -0,00345 | 0,009 | 0,008 | 1 |
| Zkscan3   | 0,886045 | -0,00318 | 0,518 | 0,527 | 1 |
| Glmn      | 0,886431 | 4,48E-05 | 0,143 | 0,146 | 1 |
| Egln2     | 0,886675 | 0,004352 | 0,47  | 0,48  | 1 |
| Anp32a    | 0,88669  | 0,00292  | 0,753 | 0,759 | 1 |
| Xiap      | 0,886793 | -0,01496 | 0,642 | 0,624 | 1 |
| Mis12     | 0,886851 | 0,004815 | 0,192 | 0,195 | 1 |
| Cog2      | 0,886915 | -0,00729 | 0,217 | 0,22  | 1 |
| Trim33    | 0,887012 | 0,0046   | 0,38  | 0,387 | 1 |
| Baz2a     | 0,887094 | 0,017272 | 0,341 | 0,351 | 1 |
| Nup155    | 0,887233 | 0,007869 | 0,122 | 0,12  | 1 |
| Gpn1      | 0,887527 | -0,00348 | 0,218 | 0,221 | 1 |
| Fbxo34    | 0,887572 | -0,00602 | 0,109 | 0,106 | 1 |
| Gm45869   | 0,887598 | 0,002017 | 0,014 | 0,015 | 1 |
| Mpzl3     | 0,887598 | 0,007792 | 0,014 | 0,015 | 1 |
| Zc3h14    | 0,887869 | 0,000729 | 0,38  | 0,372 | 1 |
| Ilf3      | 0,887916 | -0,00114 | 0,503 | 0,496 | 1 |
| Gm12976   | 0,887976 | 0,001953 | 0,069 | 0,067 | 1 |
| Mobp      | 0,887976 | -0,00321 | 0,999 | 1     | 1 |
| Hivep1    | 0,888027 | 0,001397 | 0,072 | 0,07  | 1 |
| Wdr60     | 0,888102 | 0,002968 | 0,253 | 0,259 | 1 |
| Tmem79    | 0,888172 | 0,001098 | 0,026 | 0,024 | 1 |
| Gabpb2    | 0,888274 | 0,00425  | 0,384 | 0,389 | 1 |
| Gm26843   | 0,88842  | -0,00174 | 0,026 | 0,028 | 1 |
| Zfp956    | 0,888521 | -0,00069 | 0,039 | 0,041 | 1 |
| 2900093K  | 0,888555 | 0,005602 | 0,18  | 0,184 | 1 |
| Slc35c1   | 0,888621 | 0,00348  | 0,081 | 0,08  | 1 |
| Vps28     | 0,888644 | 0,017387 | 0,739 | 0,764 | 1 |
| Rictor    | 0,888797 | -0,00546 | 0,575 | 0,564 | 1 |
| Pml       | 0,888798 | 0,007302 | 0,117 | 0,12  | 1 |
| Uggt1     | 0,88895  | 0,008399 | 0,311 | 0,309 | 1 |
| Ndufb8    | 0,889058 | -0,01197 | 0,916 | 0,937 | 1 |
| Dnajc11   | 0,889293 | -0,00114 | 0,336 | 0,338 | 1 |
| Gm44421   | 0,889499 | -0,00282 | 0,079 | 0,081 | 1 |

|          |          |          |       |       |   |
|----------|----------|----------|-------|-------|---|
| Kcnk5    | 0,889692 | -0,00127 | 0,087 | 0,089 | 1 |
| Chst8    | 0,889722 | 0,01446  | 0,318 | 0,327 | 1 |
| Rbpj     | 0,889762 | 0,00216  | 0,415 | 0,41  | 1 |
| Xpot     | 0,889864 | 0,008769 | 0,199 | 0,197 | 1 |
| Kif20b   | 0,88987  | -0,00196 | 0,03  | 0,029 | 1 |
| Spata7   | 0,890054 | 0,017999 | 0,171 | 0,167 | 1 |
| Al197445 | 0,890071 | 0,002072 | 0,026 | 0,024 | 1 |
| Gpr157   | 0,890145 | 0,004639 | 0,055 | 0,057 | 1 |
| Clptm1   | 0,890156 | 0,007194 | 0,803 | 0,821 | 1 |
| Fbxo25   | 0,890973 | 0,005871 | 0,361 | 0,366 | 1 |
| Ric3     | 0,891053 | 0,006999 | 0,123 | 0,12  | 1 |
| Spag1    | 0,891062 | -0,00025 | 0,057 | 0,059 | 1 |
| Hmg20b   | 0,891086 | 0,022214 | 0,403 | 0,402 | 1 |
| Ell      | 0,891288 | 0,011218 | 0,192 | 0,19  | 1 |
| Bclaf1   | 0,891292 | 0,021354 | 0,805 | 0,816 | 1 |
| Gm13293  | 0,89144  | -0,00672 | 0,363 | 0,369 | 1 |
| Nup188   | 0,891634 | 0,011112 | 0,107 | 0,106 | 1 |
| Cavin3   | 0,891722 | 0,009402 | 0,822 | 0,82  | 1 |
| Med11    | 0,891846 | -0,00809 | 0,127 | 0,124 | 1 |
| Col6a3   | 0,892002 | 0,003744 | 0,062 | 0,06  | 1 |
| Fam212a  | 0,892053 | 0,000544 | 0,039 | 0,041 | 1 |
| Csmd2    | 0,892145 | 0,00327  | 0,1   | 0,102 | 1 |
| Fam120c  | 0,892221 | 0,011554 | 0,206 | 0,205 | 1 |
| Romo1    | 0,892385 | 0,009935 | 0,686 | 0,702 | 1 |
| Usp11    | 0,892482 | -0,01037 | 0,29  | 0,289 | 1 |
| Mtf2     | 0,892564 | -0,00747 | 0,375 | 0,372 | 1 |
| Homer1   | 0,892586 | 0,009944 | 0,218 | 0,223 | 1 |
| Zbtb48   | 0,892675 | 0,006171 | 0,073 | 0,075 | 1 |
| Ing2     | 0,892709 | 0,015187 | 0,252 | 0,25  | 1 |
| Setd2    | 0,892885 | 0,03242  | 0,565 | 0,58  | 1 |
| Zcchc3   | 0,893088 | 0,003229 | 0,182 | 0,185 | 1 |
| Mitd1    | 0,893255 | 0,003679 | 0,249 | 0,247 | 1 |
| Syn3     | 0,893277 | 0,003356 | 0,035 | 0,034 | 1 |
| Bbs4     | 0,893618 | 0,002518 | 0,145 | 0,143 | 1 |
| Tmem208  | 0,893771 | 0,008552 | 0,569 | 0,58  | 1 |
| Rbm4     | 0,89397  | 0,001971 | 0,075 | 0,076 | 1 |
| Gm26779  | 0,89398  | -0,00432 | 0,019 | 0,02  | 1 |
| Nr1d1    | 0,894016 | -0,00112 | 0,026 | 0,024 | 1 |
| Nxt1     | 0,89415  | 0,00198  | 0,15  | 0,153 | 1 |
| Chn1     | 0,894275 | 0,018082 | 0,123 | 0,122 | 1 |
| Zfp54    | 0,89434  | -0,00562 | 0,019 | 0,02  | 1 |
| Dek      | 0,894347 | 0,016126 | 0,85  | 0,859 | 1 |
| Rpl6     | 0,894496 | -0,01299 | 0,996 | 0,998 | 1 |
| Ndufb9   | 0,894526 | -0,00056 | 0,961 | 0,976 | 1 |
| Cluap1   | 0,89462  | 0,001724 | 0,326 | 0,33  | 1 |
| Tbc1d25  | 0,894624 | -0,00034 | 0,044 | 0,046 | 1 |
| Map10    | 0,894776 | 0,006771 | 0,079 | 0,078 | 1 |
| Ccdc126  | 0,895037 | 0,011868 | 0,082 | 0,081 | 1 |
| Lypla1   | 0,895209 | -0,0011  | 0,214 | 0,218 | 1 |
| Pigt     | 0,895333 | 0,005415 | 0,65  | 0,644 | 1 |
| Bap1     | 0,895551 | 0,00373  | 0,191 | 0,189 | 1 |
| Wdr20    | 0,89573  | 0,010807 | 0,54  | 0,563 | 1 |



|          |          |          |       |       |   |
|----------|----------|----------|-------|-------|---|
| Grpel1   | 0,895764 | 0,010264 | 0,598 | 0,59  | 1 |
| Kif18a   | 0,895943 | -0,00063 | 0,044 | 0,046 | 1 |
| B4galt4  | 0,895969 | 0,003356 | 0,035 | 0,034 | 1 |
| 4930572G | 0,895984 | 0,005249 | 0,04  | 0,039 | 1 |
| Retsat   | 0,89602  | -0,00141 | 0,11  | 0,107 | 1 |
| Gm26720  | 0,896151 | 0,010971 | 0,078 | 0,076 | 1 |
| 9330175M | 0,896265 | 0,003621 | 0,014 | 0,013 | 1 |
| Dync1i1  | 0,896274 | -0,00486 | 0,136 | 0,138 | 1 |
| 2210011C | 0,89632  | 0,004656 | 0,06  | 0,059 | 1 |
| Rpl36al  | 0,896336 | 0,020532 | 0,856 | 0,867 | 1 |
| P4htm    | 0,896376 | 0,014304 | 0,367 | 0,369 | 1 |
| Zfp13    | 0,896404 | 0,005257 | 0,06  | 0,059 | 1 |
| Kptn     | 0,896459 | 0,007571 | 0,265 | 0,27  | 1 |
| ltgb4    | 0,896566 | -0,00185 | 0,765 | 0,751 | 1 |
| Zpr1     | 0,896597 | -3,6E-05 | 0,337 | 0,341 | 1 |
| Zfp280b  | 0,896625 | 0,003436 | 0,065 | 0,067 | 1 |
| Celf5    | 0,896695 | 0,005231 | 0,014 | 0,013 | 1 |
| Eps15l1  | 0,896987 | 0,006907 | 0,219 | 0,218 | 1 |
| Acss2    | 0,896991 | 0,001277 | 0,442 | 0,442 | 1 |
| Fyn      | 0,89711  | 0,008112 | 0,544 | 0,541 | 1 |
| Ppp1r11  | 0,8975   | 0,005703 | 0,588 | 0,574 | 1 |
| B930082K | 0,897538 | 0,007408 | 0,047 | 0,049 | 1 |
| Pgam5    | 0,897568 | 0,007221 | 0,168 | 0,171 | 1 |
| AC134548 | 0,897782 | -0,00244 | 0,019 | 0,02  | 1 |
| Fzd4     | 0,897901 | -0,00574 | 0,031 | 0,033 | 1 |
| Rnasel   | 0,89798  | 0,006513 | 0,014 | 0,013 | 1 |
| Gm35315  | 0,89798  | 0,004586 | 0,014 | 0,013 | 1 |
| Ccdc50   | 0,898133 | 0,010711 | 0,603 | 0,611 | 1 |
| Epb41l4a | 0,898189 | 0,003854 | 0,116 | 0,114 | 1 |
| Naa25    | 0,898221 | 0,007496 | 0,17  | 0,176 | 1 |
| Ssr2     | 0,89861  | 0,006856 | 0,728 | 0,741 | 1 |
| Pnrc1    | 0,898646 | 0,049486 | 0,749 | 0,771 | 1 |
| Bricd5   | 0,898813 | -0,00463 | 0,072 | 0,073 | 1 |
| Maea     | 0,899262 | -0,0004  | 0,351 | 0,358 | 1 |
| Cldn10   | 0,899268 | 0,002017 | 0,014 | 0,013 | 1 |
| Zfp93    | 0,899347 | 0,007394 | 0,065 | 0,063 | 1 |
| Ube2e1   | 0,89967  | -0,00195 | 0,543 | 0,548 | 1 |
| Gm2464   | 0,899696 | 0,001689 | 0,014 | 0,013 | 1 |
| Cdkl2    | 0,899741 | -0,00454 | 0,169 | 0,171 | 1 |
| Slc4a11  | 0,899912 | 0,000416 | 0,014 | 0,013 | 1 |
| Rorb     | 0,899912 | -0,00022 | 0,014 | 0,013 | 1 |
| Gan      | 0,900156 | 0,007698 | 0,29  | 0,296 | 1 |
| Efemp1   | 0,900171 | 0,003804 | 0,2   | 0,198 | 1 |
| Sfr1     | 0,900253 | 0,017608 | 0,952 | 0,946 | 1 |
| Cdk2ap1  | 0,900332 | -0,02653 | 0,657 | 0,641 | 1 |
| Fh1      | 0,900336 | -0,00307 | 0,357 | 0,363 | 1 |
| Eif3f    | 0,900458 | 0,019332 | 0,859 | 0,87  | 1 |
| Ndufa5   | 0,900756 | 0,008389 | 0,897 | 0,899 | 1 |
| Rnf115   | 0,900838 | 0,003059 | 0,385 | 0,384 | 1 |
| Fam184b  | 0,900865 | -0,00115 | 0,019 | 0,02  | 1 |
| Haus8    | 0,90094  | 0,009418 | 0,238 | 0,236 | 1 |
| Dach2    | 0,900969 | 0,002459 | 0,045 | 0,044 | 1 |

|           |          |          |       |       |   |
|-----------|----------|----------|-------|-------|---|
| Zfp652    | 0,90105  | 0,004    | 0,378 | 0,385 | 1 |
| Nemp2     | 0,901227 | 0,000412 | 0,115 | 0,112 | 1 |
| Rpl30     | 0,901295 | -0,00045 | 0,996 | 0,995 | 1 |
| Epn1      | 0,901394 | 0,006991 | 0,625 | 0,607 | 1 |
| Tspan12   | 0,901413 | 0,000721 | 0,014 | 0,013 | 1 |
| Olfr1385  | 0,901413 | 0,000721 | 0,014 | 0,013 | 1 |
| Rangap1   | 0,901445 | -0,00482 | 0,604 | 0,616 | 1 |
| Mettl14   | 0,901502 | 0,00612  | 0,25  | 0,246 | 1 |
| Psm3      | 0,90163  | 0,002516 | 0,755 | 0,777 | 1 |
| Ncaph2    | 0,901708 | 0,01535  | 0,395 | 0,398 | 1 |
| Kctd17    | 0,901776 | 0,017107 | 0,496 | 0,506 | 1 |
| Ost4      | 0,901864 | 0,00662  | 0,77  | 0,782 | 1 |
| Cib1      | 0,901976 | 0,00848  | 0,3   | 0,309 | 1 |
| Myef2     | 0,902221 | -0,00286 | 0,602 | 0,597 | 1 |
| Trim44    | 0,902299 | -0,00257 | 0,636 | 0,655 | 1 |
| Gnpat     | 0,902342 | 0,001986 | 0,323 | 0,32  | 1 |
| Mrps33    | 0,902353 | 0,009268 | 0,807 | 0,818 | 1 |
| Apaf1     | 0,90248  | 0,003201 | 0,082 | 0,085 | 1 |
| Itgad     | 0,902538 | -0,00161 | 0,07  | 0,068 | 1 |
| Epb41l4ao | 0,902549 | 0,020246 | 0,256 | 0,259 | 1 |
| Tnks      | 0,902575 | 0,013003 | 0,673 | 0,663 | 1 |
| Mat2b     | 0,902619 | 0,007353 | 0,506 | 0,506 | 1 |
| Usf2      | 0,902781 | 0,012524 | 0,762 | 0,779 | 1 |
| Ccsap     | 0,902884 | -0,00607 | 0,081 | 0,083 | 1 |
| Eapp      | 0,902965 | 0,007926 | 0,602 | 0,61  | 1 |
| Otud4     | 0,903417 | 0,026551 | 0,368 | 0,379 | 1 |
| Mrpl17    | 0,9036   | 0,01419  | 0,589 | 0,597 | 1 |
| Snd1      | 0,903784 | -0,00382 | 0,379 | 0,377 | 1 |
| Pomgnt2   | 0,903964 | 0,009404 | 0,097 | 0,096 | 1 |
| Dpm2      | 0,90399  | 0,007137 | 0,52  | 0,533 | 1 |
| Ddx55     | 0,904017 | 0,006325 | 0,315 | 0,312 | 1 |
| Clint1    | 0,90408  | 0,002429 | 0,317 | 0,319 | 1 |
| Zfp874a   | 0,904252 | 0,004997 | 0,112 | 0,111 | 1 |
| Ccdc92    | 0,90426  | 0,003985 | 0,176 | 0,179 | 1 |
| Dr1       | 0,904308 | 0,007876 | 0,25  | 0,255 | 1 |
| Prps1     | 0,90442  | 0,008013 | 0,184 | 0,189 | 1 |
| Chst14    | 0,904462 | 0,004322 | 0,05  | 0,049 | 1 |
| Phtf2     | 0,90454  | 0,01315  | 0,063 | 0,062 | 1 |
| Cadps     | 0,90458  | 0,002977 | 0,083 | 0,086 | 1 |
| Pgm3      | 0,904611 | -0,00185 | 0,282 | 0,285 | 1 |
| 91300190  | 0,904725 | 0,009888 | 0,048 | 0,047 | 1 |
| Rhpn2     | 0,904924 | -0,00038 | 0,319 | 0,312 | 1 |
| Ranbp1    | 0,905    | 0,025847 | 0,674 | 0,698 | 1 |
| Hdac7     | 0,905069 | 0,030331 | 0,366 | 0,382 | 1 |
| Rack1     | 0,905158 | -0,00038 | 0,943 | 0,946 | 1 |
| Garnl3    | 0,905184 | 0,002546 | 0,142 | 0,145 | 1 |
| Nolc1     | 0,905523 | 0,030218 | 0,36  | 0,369 | 1 |
| Ptpn11    | 0,90554  | 0,011872 | 0,878 | 0,876 | 1 |
| Zfyve1    | 0,905541 | 0,012551 | 0,377 | 0,376 | 1 |
| Gnpda1    | 0,90573  | -0,00535 | 0,182 | 0,184 | 1 |
| Thumpd1   | 0,905842 | 0,008021 | 0,432 | 0,444 | 1 |
| Gm28050   | 0,905899 | 0,003632 | 0,019 | 0,018 | 1 |

|          |          |          |       |       |   |
|----------|----------|----------|-------|-------|---|
| Gm26882  | 0,906065 | 0,010017 | 0,088 | 0,091 | 1 |
| Hcfc1r1  | 0,906345 | 0,014739 | 0,81  | 0,815 | 1 |
| Tmlhe    | 0,906356 | 0,001209 | 0,044 | 0,046 | 1 |
| S100a7a  | 0,906483 | -0,0049  | 0,024 | 0,024 | 1 |
| Bud13    | 0,906607 | 0,004961 | 0,07  | 0,068 | 1 |
| Msl1     | 0,906661 | -0,00372 | 0,493 | 0,494 | 1 |
| Zfp784   | 0,906715 | 0,002459 | 0,045 | 0,044 | 1 |
| 60304070 | 0,906807 | 0,002737 | 0,126 | 0,124 | 1 |
| Brca2    | 0,906991 | 0,002309 | 0,079 | 0,078 | 1 |
| Sec23ip  | 0,907084 | -0,00456 | 0,325 | 0,327 | 1 |
| Trappc13 | 0,907129 | 0,00227  | 0,393 | 0,398 | 1 |
| Rc3h1    | 0,90716  | 0,028274 | 0,604 | 0,613 | 1 |
| Tsen2    | 0,907232 | 0,004301 | 0,215 | 0,211 | 1 |
| Dolk     | 0,907253 | 0,003154 | 0,271 | 0,273 | 1 |
| Cdt1     | 0,907375 | 0,002996 | 0,019 | 0,018 | 1 |
| Itn2     | 0,907775 | 0,015297 | 0,77  | 0,782 | 1 |
| Fam193a  | 0,907858 | 0,00452  | 0,435 | 0,428 | 1 |
| Samd14   | 0,907927 | 0,003632 | 0,019 | 0,018 | 1 |
| Swi5     | 0,908163 | 0,004337 | 0,936 | 0,946 | 1 |
| Ahctf1   | 0,908266 | 0,030781 | 0,34  | 0,345 | 1 |
| Zfp367   | 0,908286 | 0,006405 | 0,181 | 0,179 | 1 |
| Nono     | 0,908287 | 0,005871 | 0,656 | 0,655 | 1 |
| Ccdc174  | 0,908629 | 0,018182 | 0,413 | 0,426 | 1 |
| Atp6v0c  | 0,908823 | 0,002506 | 0,065 | 0,063 | 1 |
| Rab21    | 0,909136 | 0,00531  | 0,919 | 0,893 | 1 |
| Rnf149   | 0,909197 | -0,00651 | 0,349 | 0,35  | 1 |
| Lekr1    | 0,909199 | 0,000331 | 0,147 | 0,15  | 1 |
| Nek3     | 0,909215 | 0,006472 | 0,078 | 0,08  | 1 |
| Gm16062  | 0,909401 | 0,005553 | 0,024 | 0,023 | 1 |
| Ncoa7    | 0,909417 | 0,013601 | 0,325 | 0,325 | 1 |
| Iba57    | 0,909457 | 0,001768 | 0,031 | 0,033 | 1 |
| Zc3h13   | 0,90979  | -0,00342 | 0,509 | 0,504 | 1 |
| Gng3     | 0,909893 | 0,004377 | 0,075 | 0,073 | 1 |
| Ibtk     | 0,909896 | 0,016141 | 0,341 | 0,351 | 1 |
| Ict1os   | 0,909923 | -0,00219 | 0,011 | 0,011 | 1 |
| Syp      | 0,909994 | 0,009365 | 0,219 | 0,218 | 1 |
| Setdb2   | 0,910083 | -0,00123 | 0,091 | 0,089 | 1 |
| Taf6l    | 0,910125 | 0,005647 | 0,345 | 0,351 | 1 |
| Mzf1     | 0,910213 | -0,00332 | 0,024 | 0,024 | 1 |
| Ccnc     | 0,910384 | 0,018607 | 0,284 | 0,288 | 1 |
| A430046D | 0,910442 | -0,00302 | 0,091 | 0,093 | 1 |
| Usp18    | 0,910465 | -0,02488 | 0,03  | 0,029 | 1 |
| Gm45767  | 0,910467 | 0,002504 | 0,133 | 0,135 | 1 |
| Wdr17    | 0,910726 | 0,007452 | 0,026 | 0,028 | 1 |
| Aebp2    | 0,91099  | 0,013313 | 0,541 | 0,55  | 1 |
| Pdgfra   | 0,911064 | 0,003955 | 0,019 | 0,018 | 1 |
| Jak1     | 0,911131 | -0,00616 | 0,487 | 0,472 | 1 |
| Pced1a   | 0,911299 | 0,004435 | 0,119 | 0,117 | 1 |
| Glud1    | 0,911312 | 0,005007 | 0,684 | 0,678 | 1 |
| Med24    | 0,911379 | 0,003772 | 0,204 | 0,208 | 1 |
| Hectd3   | 0,911669 | 0,019116 | 0,219 | 0,221 | 1 |
| Chmp7    | 0,911854 | 0,012065 | 0,806 | 0,808 | 1 |

|           |          |          |       |       |   |
|-----------|----------|----------|-------|-------|---|
| Hps4      | 0,911941 | 0,012403 | 0,208 | 0,213 | 1 |
| Mcu       | 0,911973 | 0,009547 | 0,132 | 0,132 | 1 |
| Il1r2     | 0,912175 | -0,00193 | 0,003 | 0,003 | 1 |
| Syt13     | 0,912175 | -0,00193 | 0,003 | 0,003 | 1 |
| Cd72      | 0,912175 | -0,00193 | 0,003 | 0,003 | 1 |
| Poln      | 0,912175 | -0,00193 | 0,003 | 0,003 | 1 |
| Met       | 0,912175 | -0,00193 | 0,003 | 0,003 | 1 |
| B3gnt8    | 0,912175 | -0,00193 | 0,003 | 0,003 | 1 |
| Nps       | 0,912175 | -0,00193 | 0,003 | 0,003 | 1 |
| Akr1b8    | 0,912175 | -0,00354 | 0,003 | 0,003 | 1 |
| Nr3c1     | 0,912295 | 0,008858 | 0,934 | 0,948 | 1 |
| Sdha      | 0,912364 | 0,005582 | 0,907 | 0,909 | 1 |
| Gm29183   | 0,912533 | -0,00058 | 0,011 | 0,011 | 1 |
| Galnt2    | 0,912533 | -0,00058 | 0,011 | 0,011 | 1 |
| Abcg4     | 0,912533 | -0,00058 | 0,011 | 0,011 | 1 |
| Usp8      | 0,912568 | -0,00313 | 0,55  | 0,561 | 1 |
| Dcun1d1   | 0,91259  | 0,005871 | 0,432 | 0,439 | 1 |
| Unc13c    | 0,912624 | -0,00257 | 0,003 | 0,003 | 1 |
| Ube3b     | 0,912922 | -0,00932 | 0,248 | 0,249 | 1 |
| Stx7      | 0,912928 | 0,007851 | 0,812 | 0,844 | 1 |
| Efhc2     | 0,913072 | -0,00095 | 0,003 | 0,003 | 1 |
| A930001A  | 0,913072 | -0,00095 | 0,003 | 0,003 | 1 |
| Dram1     | 0,913072 | -0,00095 | 0,003 | 0,003 | 1 |
| Olfr18    | 0,913072 | -0,00095 | 0,003 | 0,003 | 1 |
| Plcd1     | 0,913072 | -0,00095 | 0,003 | 0,003 | 1 |
| AL591946  | 0,913072 | -0,00095 | 0,003 | 0,003 | 1 |
| Col4a4    | 0,913072 | -0,00159 | 0,003 | 0,003 | 1 |
| Akap2     | 0,913111 | 0,005284 | 0,097 | 0,096 | 1 |
| Mipep     | 0,913219 | 0,004978 | 0,087 | 0,086 | 1 |
| Prr7      | 0,913278 | 0,002036 | 0,019 | 0,018 | 1 |
| Ncapg2    | 0,913399 | 0,016256 | 0,153 | 0,153 | 1 |
| Ppp2r5a   | 0,913442 | 0,021012 | 0,693 | 0,714 | 1 |
| Rassf5    | 0,913521 | -0,00031 | 0,003 | 0,003 | 1 |
| Platr23   | 0,913521 | -0,00031 | 0,003 | 0,003 | 1 |
| Nek2      | 0,913521 | -0,00031 | 0,003 | 0,003 | 1 |
| Tspyl3    | 0,913521 | -0,00031 | 0,003 | 0,003 | 1 |
| Nfatc2    | 0,913521 | -0,00031 | 0,003 | 0,003 | 1 |
| Bmp7      | 0,913521 | -0,00031 | 0,003 | 0,003 | 1 |
| 9530027JC | 0,913521 | -0,00031 | 0,003 | 0,003 | 1 |
| Dcx       | 0,913521 | -0,00031 | 0,003 | 0,003 | 1 |
| Ace2      | 0,913521 | -0,00031 | 0,003 | 0,003 | 1 |
| P2ry14    | 0,913521 | -0,00031 | 0,003 | 0,003 | 1 |
| Gm34866   | 0,913521 | -0,00031 | 0,003 | 0,003 | 1 |
| Spag8     | 0,913521 | -0,00031 | 0,003 | 0,003 | 1 |
| Cdkn2b    | 0,913521 | -0,00031 | 0,003 | 0,003 | 1 |
| Heyl      | 0,913521 | -0,00031 | 0,003 | 0,003 | 1 |
| Slc25a34  | 0,913521 | -0,00031 | 0,003 | 0,003 | 1 |
| Zfp993    | 0,913521 | -0,00031 | 0,003 | 0,003 | 1 |
| Jakmip1   | 0,913521 | -0,00031 | 0,003 | 0,003 | 1 |
| Clec4d    | 0,913521 | -0,00031 | 0,003 | 0,003 | 1 |
| Cdca3     | 0,913521 | -0,00031 | 0,003 | 0,003 | 1 |
| Tmem145   | 0,913521 | -0,00031 | 0,003 | 0,003 | 1 |

|           |          |          |       |       |   |
|-----------|----------|----------|-------|-------|---|
| 4930558N  | 0,913521 | -0,00031 | 0,003 | 0,003 | 1 |
| Ddias     | 0,913521 | -0,00031 | 0,003 | 0,003 | 1 |
| Olfr633   | 0,913521 | -0,00031 | 0,003 | 0,003 | 1 |
| Olfr675   | 0,913521 | -0,00031 | 0,003 | 0,003 | 1 |
| Shank2    | 0,913521 | -0,00031 | 0,003 | 0,003 | 1 |
| Cdk1      | 0,913521 | -0,00031 | 0,003 | 0,003 | 1 |
| Itgb2     | 0,913521 | -0,00031 | 0,003 | 0,003 | 1 |
| Matk      | 0,913521 | -0,00031 | 0,003 | 0,003 | 1 |
| Parppb    | 0,913521 | -0,00031 | 0,003 | 0,003 | 1 |
| AC117232. | 0,913521 | -0,00031 | 0,003 | 0,003 | 1 |
| Slc7a2    | 0,913521 | -0,00031 | 0,003 | 0,003 | 1 |
| Galntl6   | 0,913521 | -0,00031 | 0,003 | 0,003 | 1 |
| Npy1r     | 0,913521 | -0,00031 | 0,003 | 0,003 | 1 |
| Gm26721   | 0,913521 | -0,00031 | 0,003 | 0,003 | 1 |
| Dhrs2     | 0,913521 | -0,00031 | 0,003 | 0,003 | 1 |
| Gpc5      | 0,913521 | -0,00031 | 0,003 | 0,003 | 1 |
| Olfr976   | 0,913521 | -0,00031 | 0,003 | 0,003 | 1 |
| Gm47043   | 0,913521 | -0,00031 | 0,003 | 0,003 | 1 |
| Nefh      | 0,913521 | -0,00031 | 0,003 | 0,003 | 1 |
| Hsd17b1   | 0,913521 | -0,00031 | 0,003 | 0,003 | 1 |
| Etv4      | 0,913521 | -0,00031 | 0,003 | 0,003 | 1 |
| A330076C  | 0,913521 | -0,00031 | 0,003 | 0,003 | 1 |
| Gm48780   | 0,913521 | -0,00031 | 0,003 | 0,003 | 1 |
| Efcab11   | 0,913521 | -0,00031 | 0,003 | 0,003 | 1 |
| Wnt7b     | 0,913521 | -0,00031 | 0,003 | 0,003 | 1 |
| AU022754  | 0,913521 | -0,00031 | 0,003 | 0,003 | 1 |
| Itga5     | 0,913521 | -0,00031 | 0,003 | 0,003 | 1 |
| AC166832. | 0,913521 | -0,00031 | 0,003 | 0,003 | 1 |
| Fstl1     | 0,913521 | -0,00031 | 0,003 | 0,003 | 1 |
| AC125199. | 0,913521 | -0,00031 | 0,003 | 0,003 | 1 |
| 2310043M  | 0,913521 | -0,00031 | 0,003 | 0,003 | 1 |
| Gm16196   | 0,913521 | -0,00031 | 0,003 | 0,003 | 1 |
| Tcf19     | 0,913521 | -0,00031 | 0,003 | 0,003 | 1 |
| Gnmt      | 0,913521 | -0,00031 | 0,003 | 0,003 | 1 |
| Crb3      | 0,913521 | -0,00031 | 0,003 | 0,003 | 1 |
| Aqp1      | 0,913521 | 2,86E-05 | 0,003 | 0,003 | 1 |
| Exoc4     | 0,913641 | 0,018063 | 0,515 | 0,528 | 1 |
| Fbln7     | 0,913807 | 0,005557 | 0,038 | 0,037 | 1 |
| Palmd     | 0,91397  | 2,86E-05 | 0,003 | 0,003 | 1 |
| Poli      | 0,914112 | 0,005871 | 0,053 | 0,052 | 1 |
| Gm21992   | 0,914195 | 0,001359 | 0,011 | 0,011 | 1 |
| Gm39214   | 0,914195 | 0,00039  | 0,011 | 0,011 | 1 |
| Gm4787    | 0,914195 | 0,00039  | 0,011 | 0,011 | 1 |
| Hist2h3c2 | 0,914417 | -0,00456 | 0,028 | 0,029 | 1 |
| Atrnl1    | 0,914418 | 0,003599 | 0,003 | 0,003 | 1 |
| Cyp7b1    | 0,914418 | 0,002624 | 0,003 | 0,003 | 1 |
| Mme       | 0,914418 | 0,002624 | 0,003 | 0,003 | 1 |
| Arhgef17  | 0,914418 | 0,002624 | 0,003 | 0,003 | 1 |
| Cyr61     | 0,914418 | 0,001648 | 0,003 | 0,003 | 1 |
| Gm26683   | 0,914418 | 0,000671 | 0,003 | 0,003 | 1 |
| Capn8     | 0,914418 | 0,000671 | 0,003 | 0,003 | 1 |
| Enkur     | 0,914418 | 0,000671 | 0,003 | 0,003 | 1 |

|            |          |          |       |       |   |
|------------|----------|----------|-------|-------|---|
| Slc2a6     | 0,914418 | 0,000671 | 0,003 | 0,003 | 1 |
| Nr6a1os    | 0,914418 | 0,000671 | 0,003 | 0,003 | 1 |
| Erv3       | 0,914418 | 0,000671 | 0,003 | 0,003 | 1 |
| Gm26952    | 0,914418 | 0,000671 | 0,003 | 0,003 | 1 |
| Hist2h2aa2 | 0,914418 | 0,000671 | 0,003 | 0,003 | 1 |
| Bcar3      | 0,914418 | 0,000671 | 0,003 | 0,003 | 1 |
| Zfp69      | 0,914418 | 0,000671 | 0,003 | 0,003 | 1 |
| Eva1b      | 0,914418 | 0,000671 | 0,003 | 0,003 | 1 |
| Mmp23      | 0,914418 | 0,000671 | 0,003 | 0,003 | 1 |
| Gm7854     | 0,914418 | 0,000671 | 0,003 | 0,003 | 1 |
| Gm29707    | 0,914418 | 0,000671 | 0,003 | 0,003 | 1 |
| Add2       | 0,914418 | 0,000671 | 0,003 | 0,003 | 1 |
| Gm15612    | 0,914418 | 0,000671 | 0,003 | 0,003 | 1 |
| Vmn1r65    | 0,914418 | 0,000671 | 0,003 | 0,003 | 1 |
| Omp        | 0,914418 | 0,000671 | 0,003 | 0,003 | 1 |
| B430219N   | 0,914418 | 0,000671 | 0,003 | 0,003 | 1 |
| Ccdc38     | 0,914418 | 0,000671 | 0,003 | 0,003 | 1 |
| Glpr1      | 0,914418 | 0,000671 | 0,003 | 0,003 | 1 |
| Ctrl       | 0,914418 | 0,000671 | 0,003 | 0,003 | 1 |
| M5C1000I   | 0,914418 | 0,000671 | 0,003 | 0,003 | 1 |
| Sult4a1    | 0,914418 | 0,000671 | 0,003 | 0,003 | 1 |
| Gm16299    | 0,914418 | 0,000671 | 0,003 | 0,003 | 1 |
| Cnbp       | 0,914446 | -0,00018 | 0,965 | 0,972 | 1 |
| Arpc5      | 0,914846 | 0,01597  | 0,921 | 0,935 | 1 |
| Mxi1       | 0,914883 | 0,014426 | 0,671 | 0,678 | 1 |
| Rab4b      | 0,914952 | 0,008574 | 0,181 | 0,18  | 1 |
| Slc2a10    | 0,915316 | 0,001648 | 0,003 | 0,003 | 1 |
| Lmod3      | 0,915316 | 0,001648 | 0,003 | 0,003 | 1 |
| Ahdc1      | 0,915606 | -0,01156 | 0,153 | 0,15  | 1 |
| Slc38a6    | 0,915619 | 0,014855 | 0,255 | 0,255 | 1 |
| C230004F1  | 0,915857 | 0,001359 | 0,011 | 0,011 | 1 |
| Gm34788    | 0,915857 | 0,001359 | 0,011 | 0,011 | 1 |
| Gm44759    | 0,915857 | 0,003295 | 0,011 | 0,011 | 1 |
| Wdr75      | 0,915871 | 0,005047 | 0,16  | 0,163 | 1 |
| 2810454H   | 0,916032 | 0,032753 | 0,139 | 0,141 | 1 |
| Adam4      | 0,916635 | 0,003332 | 0,024 | 0,023 | 1 |
| Prr14l     | 0,916765 | 0,001561 | 0,281 | 0,276 | 1 |
| Pum3       | 0,916915 | 0,004559 | 0,37  | 0,369 | 1 |
| Adcy10     | 0,916971 | -0,00148 | 0,019 | 0,018 | 1 |
| Lrrfip2    | 0,917254 | 0,005871 | 0,388 | 0,398 | 1 |
| Csde1      | 0,917283 | -0,00446 | 0,972 | 0,98  | 1 |
| Safb       | 0,917488 | 0,008806 | 0,749 | 0,772 | 1 |
| C2cd5      | 0,917722 | 0,019158 | 0,359 | 0,366 | 1 |
| Mdh1       | 0,917792 | 0,015803 | 0,785 | 0,793 | 1 |
| Zfp160     | 0,917986 | 0,003671 | 0,258 | 0,263 | 1 |
| Plekha8    | 0,918077 | 0,002776 | 0,137 | 0,14  | 1 |
| Man2b1     | 0,91849  | 0,006333 | 0,305 | 0,314 | 1 |
| St6galnac6 | 0,918494 | 0,004357 | 0,067 | 0,068 | 1 |
| Rnf215     | 0,918566 | 0,008458 | 0,223 | 0,221 | 1 |
| Snx14      | 0,918808 | 0,003695 | 0,276 | 0,28  | 1 |
| Maneal     | 0,918819 | -0,0063  | 0,157 | 0,159 | 1 |
| Gm47551    | 0,918939 | 0,000795 | 0,024 | 0,023 | 1 |

|          |          |          |       |       |   |
|----------|----------|----------|-------|-------|---|
| Impdh1   | 0,919183 | 0,005228 | 0,011 | 0,011 | 1 |
| Timm10   | 0,919186 | 0,026039 | 0,262 | 0,265 | 1 |
| Zxdc     | 0,91926  | 0,000729 | 0,269 | 0,273 | 1 |
| Irf9     | 0,919325 | -0,03603 | 0,158 | 0,156 | 1 |
| Recql5   | 0,919705 | 0,01845  | 0,144 | 0,145 | 1 |
| Naa50    | 0,919766 | 0,007684 | 0,513 | 0,515 | 1 |
| Unc5c    | 0,920095 | 0,017811 | 0,63  | 0,646 | 1 |
| Amd1     | 0,920146 | 0,000123 | 0,845 | 0,857 | 1 |
| Gm16223  | 0,92022  | 0,002108 | 0,036 | 0,037 | 1 |
| Tpm4     | 0,920289 | 0,009587 | 0,184 | 0,182 | 1 |
| Klf11    | 0,920415 | -0,00194 | 0,195 | 0,197 | 1 |
| Cnpy3    | 0,92043  | 0,010777 | 0,518 | 0,527 | 1 |
| Pafah2   | 0,920466 | -0,0091  | 0,078 | 0,078 | 1 |
| Gm7347   | 0,920482 | -0,00145 | 0,019 | 0,018 | 1 |
| Slc48a1  | 0,920497 | 0,002472 | 0,999 | 1     | 1 |
| 1600012H | 0,920869 | 0,012139 | 0,294 | 0,296 | 1 |
| Dnajb14  | 0,920955 | 0,011736 | 0,781 | 0,792 | 1 |
| Lig4     | 0,921162 | 0,009045 | 0,116 | 0,115 | 1 |
| C920006O | 0,921405 | 0,010815 | 0,103 | 0,106 | 1 |
| Atg12    | 0,921498 | 0,000487 | 0,328 | 0,33  | 1 |
| 4933404O | 0,921575 | 0,007655 | 0,09  | 0,089 | 1 |
| Myg1     | 0,921832 | 0,001504 | 0,335 | 0,338 | 1 |
| Mrpl44   | 0,921924 | -0,00617 | 0,126 | 0,127 | 1 |
| Nemf     | 0,922078 | 0,00234  | 0,65  | 0,629 | 1 |
| Pecr     | 0,922089 | 0,011012 | 0,223 | 0,223 | 1 |
| Slc39a11 | 0,922662 | 0,000851 | 0,094 | 0,096 | 1 |
| Atp5o.1  | 0,922712 | 0,002005 | 0,931 | 0,928 | 1 |
| Rad18    | 0,922825 | -0,00175 | 0,096 | 0,098 | 1 |
| Vrk2     | 0,922943 | 0,003744 | 0,068 | 0,067 | 1 |
| Zfp119b  | 0,922966 | -0,00724 | 0,038 | 0,039 | 1 |
| Ext2     | 0,922969 | 0,004032 | 0,335 | 0,332 | 1 |
| Ptcd2    | 0,922972 | 0,00968  | 0,237 | 0,244 | 1 |
| Snx16    | 0,922972 | 0,005392 | 0,275 | 0,278 | 1 |
| Erich6   | 0,923043 | 0,003332 | 0,024 | 0,024 | 1 |
| Taf1d    | 0,923135 | 0,021407 | 0,644 | 0,646 | 1 |
| Zfp326   | 0,923264 | 0,004895 | 0,575 | 0,567 | 1 |
| Sgsm3    | 0,923308 | -0,00182 | 0,128 | 0,125 | 1 |
| Gm9945   | 0,923356 | 0,008969 | 0,266 | 0,273 | 1 |
| Fbxw8    | 0,923495 | 0,01119  | 0,357 | 0,366 | 1 |
| Sec16a   | 0,92374  | 0,004152 | 0,258 | 0,262 | 1 |
| Pex1     | 0,923898 | -0,01475 | 0,298 | 0,302 | 1 |
| Fbxl4    | 0,924044 | 0,002278 | 0,154 | 0,156 | 1 |
| Abhd6    | 0,924126 | 0,004013 | 0,302 | 0,306 | 1 |
| Trmt1l   | 0,92418  | 0,023929 | 0,344 | 0,351 | 1 |
| St3gal6  | 0,924204 | 0,016081 | 0,269 | 0,272 | 1 |
| Klhl8    | 0,924267 | 0,007496 | 0,177 | 0,176 | 1 |
| Csnk1d   | 0,924552 | 0,008894 | 0,475 | 0,467 | 1 |
| Spout1   | 0,924559 | -0,01023 | 0,261 | 0,259 | 1 |
| Gigyf2   | 0,924836 | 0,002031 | 0,524 | 0,519 | 1 |
| Ctsa     | 0,924878 | 0,003992 | 0,896 | 0,904 | 1 |
| Hscb     | 0,924898 | 0,009754 | 0,221 | 0,221 | 1 |
| Gramd1c  | 0,924915 | 0,000167 | 0,028 | 0,028 | 1 |

|           |          |          |       |       |   |
|-----------|----------|----------|-------|-------|---|
| Gabarapl2 | 0,924997 | -0,00204 | 0,972 | 0,974 | 1 |
| Arih1     | 0,92503  | 0,018867 | 0,539 | 0,545 | 1 |
| Zfp60     | 0,925041 | 0,013509 | 0,359 | 0,371 | 1 |
| D230025D  | 0,925069 | 0,010004 | 0,265 | 0,27  | 1 |
| Tm9sf2    | 0,925178 | 0,010164 | 0,713 | 0,727 | 1 |
| Pggt1b    | 0,925211 | 0,003388 | 0,16  | 0,158 | 1 |
| Alg10b    | 0,925312 | 0,013872 | 0,156 | 0,156 | 1 |
| 3110002H  | 0,926001 | 0,00694  | 0,193 | 0,197 | 1 |
| Rnf7      | 0,926186 | 0,00891  | 0,99  | 0,995 | 1 |
| Pcdhb5    | 0,926206 | -0,01064 | 0,016 | 0,016 | 1 |
| Trpm4     | 0,926208 | 0,001787 | 0,033 | 0,033 | 1 |
| Tm9sf3    | 0,926221 | 0,004522 | 0,965 | 0,945 | 1 |
| Khsrp     | 0,926395 | 0,002621 | 0,456 | 0,454 | 1 |
| Spty2d1   | 0,926443 | 0,017316 | 0,27  | 0,276 | 1 |
| Dhtkd1    | 0,926627 | 0,001315 | 0,064 | 0,065 | 1 |
| Rprd2     | 0,926638 | 0,001168 | 0,421 | 0,424 | 1 |
| Zfp61     | 0,927132 | -0,00581 | 0,103 | 0,104 | 1 |
| Coq8b     | 0,927297 | 0,018913 | 0,219 | 0,22  | 1 |
| Arhgef9   | 0,927457 | 0,004355 | 0,237 | 0,236 | 1 |
| Tmem97    | 0,927516 | 0,00818  | 0,316 | 0,314 | 1 |
| Ddx46     | 0,927801 | 0,017996 | 0,578 | 0,589 | 1 |
| Cerk      | 0,927825 | 0,012379 | 0,64  | 0,649 | 1 |
| Mars      | 0,927842 | -0,0028  | 0,308 | 0,309 | 1 |
| Nfatc3    | 0,928128 | 0,023709 | 0,42  | 0,433 | 1 |
| Bhlhe22   | 0,928159 | 0,00231  | 0,007 | 0,007 | 1 |
| Gm12905   | 0,928159 | 0,00231  | 0,007 | 0,007 | 1 |
| Alox8     | 0,928159 | 0,00231  | 0,007 | 0,007 | 1 |
| C330007P  | 0,928316 | 0,01188  | 0,502 | 0,507 | 1 |
| Gabarap   | 0,928434 | 0,012591 | 0,995 | 0,998 | 1 |
| Zfp280d   | 0,928463 | 0,01515  | 0,54  | 0,545 | 1 |
| 1600020E  | 0,928939 | -0,00414 | 0,243 | 0,246 | 1 |
| Clic3     | 0,929373 | 0,004254 | 0,007 | 0,007 | 1 |
| Gm26620   | 0,929373 | 0,00231  | 0,007 | 0,007 | 1 |
| Xkrx      | 0,929373 | 0,00231  | 0,007 | 0,007 | 1 |
| Msx1      | 0,929373 | 0,001337 | 0,007 | 0,007 | 1 |
| 2310040G  | 0,929373 | 0,001337 | 0,007 | 0,007 | 1 |
| A230083G  | 0,929373 | 0,001337 | 0,007 | 0,007 | 1 |
| Dok4      | 0,929373 | 0,001337 | 0,007 | 0,007 | 1 |
| Gm12227   | 0,929373 | 0,001337 | 0,007 | 0,007 | 1 |
| Ccdc114   | 0,929578 | -0,00244 | 0,016 | 0,016 | 1 |
| Hells     | 0,929578 | -0,00244 | 0,016 | 0,016 | 1 |
| Rgl3      | 0,92961  | -0,00635 | 0,033 | 0,034 | 1 |
| Sepsecs   | 0,929663 | 0,007522 | 0,155 | 0,154 | 1 |
| Tmem53    | 0,929776 | -0,00307 | 0,016 | 0,016 | 1 |
| Dbr1      | 0,929828 | -0,00279 | 0,114 | 0,115 | 1 |
| Gk5       | 0,929971 | -0,00215 | 0,111 | 0,112 | 1 |
| Nfxl1     | 0,929975 | 0,013469 | 0,136 | 0,137 | 1 |
| Gspt2     | 0,93     | 0,01588  | 0,091 | 0,091 | 1 |
| Pde8a     | 0,930245 | -0,01233 | 0,901 | 0,88  | 1 |
| Extl2     | 0,930252 | 0,008267 | 0,37  | 0,367 | 1 |
| Dnajc2    | 0,930356 | -0,00346 | 0,326 | 0,319 | 1 |
| Farsa     | 0,930429 | 0,013697 | 0,288 | 0,291 | 1 |



|           |          |          |       |       |   |
|-----------|----------|----------|-------|-------|---|
| Sec61a2   | 0,93052  | 0,007884 | 0,558 | 0,554 | 1 |
| Mlec      | 0,93055  | -0,0072  | 0,553 | 0,554 | 1 |
| Gm26691   | 0,930587 | 0,000363 | 0,007 | 0,007 | 1 |
| Kcnd2     | 0,930587 | 0,000363 | 0,007 | 0,007 | 1 |
| Gm26534   | 0,930587 | 0,000363 | 0,007 | 0,007 | 1 |
| Trip12    | 0,930589 | 0,001015 | 0,614 | 0,589 | 1 |
| 1810013L2 | 0,930602 | 0,003993 | 0,293 | 0,296 | 1 |
| 4930488L2 | 0,930635 | -0,00114 | 0,061 | 0,062 | 1 |
| Klhdc8a   | 0,931088 | 0,04938  | 0,273 | 0,276 | 1 |
| Larp1     | 0,931128 | 0,018646 | 0,579 | 0,585 | 1 |
| Eed       | 0,931137 | 0,009623 | 0,248 | 0,247 | 1 |
| Arsa      | 0,931137 | 0,01874  | 0,352 | 0,359 | 1 |
| Emd       | 0,931325 | 0,013226 | 0,358 | 0,361 | 1 |
| 1110008F1 | 0,931354 | -0,00124 | 0,638 | 0,629 | 1 |
| Eef2k     | 0,931383 | 0,016889 | 0,106 | 0,109 | 1 |
| Gm14762   | 0,931499 | -0,00028 | 0,007 | 0,007 | 1 |
| Gm26847   | 0,931499 | -0,00028 | 0,007 | 0,007 | 1 |
| Vegfa     | 0,931525 | 0,031539 | 0,11  | 0,109 | 1 |
| Jag2      | 0,931802 | -0,00189 | 0,007 | 0,007 | 1 |
| Eda2r     | 0,931876 | 0,011682 | 0,051 | 0,05  | 1 |
| Mettl25   | 0,931885 | 0,006984 | 0,147 | 0,146 | 1 |
| Tmtc4     | 0,931967 | -0,00278 | 0,076 | 0,076 | 1 |
| Dhx32     | 0,932005 | 0,001002 | 0,122 | 0,12  | 1 |
| Carns1    | 0,932116 | 0,000325 | 0,703 | 0,686 | 1 |
| Tmem238   | 0,932281 | 0,009441 | 0,163 | 0,166 | 1 |
| Col5a3    | 0,932349 | 0,013123 | 0,026 | 0,026 | 1 |
| Kif15     | 0,93241  | -0,00155 | 0,007 | 0,007 | 1 |
| Gm49207   | 0,932427 | 0,002611 | 0,092 | 0,091 | 1 |
| Map3k7    | 0,932432 | 0,018692 | 0,363 | 0,372 | 1 |
| Dbf4      | 0,932508 | -0,00348 | 0,038 | 0,039 | 1 |
| Mdrl      | 0,932554 | 0,000416 | 0,016 | 0,016 | 1 |
| Ascc1     | 0,932579 | 0,01677  | 0,259 | 0,263 | 1 |
| Zfp46     | 0,932588 | 0,001164 | 0,148 | 0,15  | 1 |
| Pald      | 0,932713 | -0,00125 | 0,007 | 0,007 | 1 |
| Gm10647   | 0,932713 | -0,00125 | 0,007 | 0,007 | 1 |
| Lonp2     | 0,93272  | 0,011432 | 0,447 | 0,462 | 1 |
| Cct3      | 0,932971 | 0,005871 | 0,848 | 0,844 | 1 |
| Dusp22    | 0,933212 | -0,00121 | 0,2   | 0,198 | 1 |
| Fbxo31    | 0,933417 | 0,02004  | 0,365 | 0,379 | 1 |
| Maml2     | 0,933536 | 0,002228 | 0,059 | 0,06  | 1 |
| Gpatch2l  | 0,933636 | -0,00031 | 0,287 | 0,285 | 1 |
| Ankfy1    | 0,93367  | 0,011399 | 0,381 | 0,392 | 1 |
| Sirt4     | 0,934089 | 0,01188  | 0,174 | 0,174 | 1 |
| 4930419G  | 0,934275 | 0,00555  | 0,012 | 0,011 | 1 |
| Fam136a   | 0,934299 | 0,000879 | 0,153 | 0,154 | 1 |
| Gdf9      | 0,934426 | -0,00376 | 0,043 | 0,044 | 1 |
| 9130604C  | 0,934539 | 0,003308 | 0,016 | 0,016 | 1 |
| Washc1    | 0,934572 | 0,016484 | 0,347 | 0,351 | 1 |
| Exosc10   | 0,934617 | 0,00052  | 0,311 | 0,314 | 1 |
| Rad51c    | 0,934738 | 0,006192 | 0,012 | 0,011 | 1 |
| Smco1     | 0,93484  | -0,00447 | 0,007 | 0,007 | 1 |
| Gm20498   | 0,934958 | -0,00037 | 0,043 | 0,042 | 1 |

|           |          |          |       |       |   |
|-----------|----------|----------|-------|-------|---|
| Ubiad1    | 0,935058 | -0,00244 | 0,088 | 0,089 | 1 |
| Trpm3     | 0,93535  | 0,004923 | 0,028 | 0,029 | 1 |
| Max       | 0,935474 | 0,022284 | 0,425 | 0,433 | 1 |
| Mpg       | 0,935532 | 0,009531 | 0,133 | 0,137 | 1 |
| Irf2bp1   | 0,935533 | 0,013737 | 0,38  | 0,392 | 1 |
| Spon1     | 0,935533 | 0,002054 | 0,016 | 0,016 | 1 |
| Nat6      | 0,935536 | -0,00272 | 0,182 | 0,182 | 1 |
| Clu       | 0,935648 | 0,089673 | 0,212 | 0,216 | 1 |
| Clk1      | 0,935732 | 0,001315 | 0,919 | 0,92  | 1 |
| Cep350    | 0,935759 | -0,00445 | 0,488 | 0,486 | 1 |
| Zfp248    | 0,935837 | 0,003532 | 0,102 | 0,101 | 1 |
| Foxred1   | 0,935873 | 0,000676 | 0,216 | 0,213 | 1 |
| Gosr2     | 0,935891 | 0,012055 | 0,395 | 0,398 | 1 |
| Uri1      | 0,935913 | 0,002149 | 0,395 | 0,39  | 1 |
| Fzd5      | 0,936198 | -0,00802 | 0,105 | 0,106 | 1 |
| Surf1     | 0,93625  | -0,00278 | 0,582 | 0,571 | 1 |
| Jtb       | 0,936343 | 0,008534 | 0,663 | 0,681 | 1 |
| Tmem131   | 0,936345 | 0,015912 | 0,317 | 0,319 | 1 |
| Dynlrb1   | 0,936503 | 0,004651 | 0,907 | 0,912 | 1 |
| Dtymk     | 0,936552 | 0,017555 | 0,44  | 0,45  | 1 |
| Hsf2      | 0,936574 | 0,005618 | 0,228 | 0,226 | 1 |
| Slc26a1   | 0,936631 | 0,000519 | 0,033 | 0,034 | 1 |
| Gpr61     | 0,936918 | 0,001294 | 0,063 | 0,062 | 1 |
| 1700008JC | 0,936955 | 0,001606 | 0,061 | 0,062 | 1 |
| Usp22     | 0,937166 | 0,00712  | 0,844 | 0,833 | 1 |
| Amdhd2    | 0,937304 | 0,017628 | 0,394 | 0,402 | 1 |
| Myo18a    | 0,937502 | 0,017095 | 0,806 | 0,81  | 1 |
| Samd15    | 0,937519 | 0,003621 | 0,012 | 0,011 | 1 |
| Mrpl35    | 0,937643 | 0,000594 | 0,286 | 0,288 | 1 |
| Foxj1     | 0,937762 | 0,015362 | 0,154 | 0,158 | 1 |
| Cavin2    | 0,937928 | -0,00867 | 0,227 | 0,226 | 1 |
| Trmt2a    | 0,938003 | 0,015845 | 0,276 | 0,281 | 1 |
| Atat1     | 0,938304 | -0,00277 | 0,614 | 0,613 | 1 |
| Pak2      | 0,93843  | 0,00248  | 0,923 | 0,932 | 1 |
| Anxa6     | 0,938521 | -0,00189 | 0,043 | 0,042 | 1 |
| Pygo2     | 0,938532 | -0,00741 | 0,232 | 0,231 | 1 |
| Axin1     | 0,938585 | 0,001349 | 0,237 | 0,239 | 1 |
| Fam228b   | 0,939047 | 0,020172 | 0,294 | 0,306 | 1 |
| Vkorc1l1  | 0,939087 | 0,01228  | 0,349 | 0,358 | 1 |
| Usp42     | 0,939356 | 0,023983 | 0,206 | 0,208 | 1 |
| Aste1     | 0,939454 | 0,001775 | 0,096 | 0,098 | 1 |
| 6330403N  | 0,939605 | 0,002328 | 0,012 | 0,011 | 1 |
| Gm5784    | 0,939605 | 0,005228 | 0,012 | 0,011 | 1 |
| A830035O  | 0,939605 | 0,004262 | 0,012 | 0,011 | 1 |
| Arfgef2   | 0,939647 | 0,005871 | 0,364 | 0,361 | 1 |
| Dennd6b   | 0,939872 | 0,000879 | 0,151 | 0,15  | 1 |
| Snx17     | 0,940072 | 0,006155 | 0,711 | 0,733 | 1 |
| Teddm2    | 0,940265 | 0,009329 | 0,026 | 0,026 | 1 |
| Cadps2    | 0,940305 | -0,00111 | 0,097 | 0,096 | 1 |
| Med22     | 0,94032  | 0,005871 | 0,27  | 0,275 | 1 |
| Cnot11    | 0,940343 | -0,00085 | 0,189 | 0,187 | 1 |
| Bhlhe41   | 0,94062  | -0,00836 | 0,839 | 0,836 | 1 |

|           |          |          |       |       |   |
|-----------|----------|----------|-------|-------|---|
| Galnt4    | 0,940801 | 0,001475 | 0,097 | 0,096 | 1 |
| Cox5a     | 0,941042 | 0,011244 | 0,817 | 0,823 | 1 |
| Tmem222   | 0,941194 | -0,00468 | 0,479 | 0,485 | 1 |
| Btf3      | 0,941215 | 0,007362 | 0,993 | 0,992 | 1 |
| Armc2     | 0,941228 | 0,003295 | 0,012 | 0,011 | 1 |
| Qser1     | 0,941523 | -0,00993 | 0,253 | 0,25  | 1 |
| Ttc28     | 0,941786 | -0,00701 | 0,156 | 0,153 | 1 |
| Itpkb     | 0,942077 | 0,00014  | 0,021 | 0,021 | 1 |
| Fbxl14    | 0,9421   | 0,005871 | 0,194 | 0,193 | 1 |
| Alkbh5    | 0,942135 | 0,019689 | 0,716 | 0,735 | 1 |
| Cldn34c1  | 0,942318 | 0,007528 | 0,286 | 0,289 | 1 |
| Dmac1     | 0,942371 | 0,003108 | 0,327 | 0,33  | 1 |
| Intu      | 0,942378 | 0,002789 | 0,051 | 0,052 | 1 |
| Ssr1      | 0,942645 | 0,012445 | 0,953 | 0,959 | 1 |
| Olfr259   | 0,942851 | 0,00039  | 0,012 | 0,011 | 1 |
| Wfdc3     | 0,942851 | 0,00039  | 0,012 | 0,011 | 1 |
| Kif24     | 0,942851 | 0,00039  | 0,012 | 0,011 | 1 |
| Ndnf      | 0,942893 | -0,00423 | 0,048 | 0,047 | 1 |
| Usp54     | 0,942917 | 0,005165 | 0,85  | 0,857 | 1 |
| Pfdn6     | 0,942932 | -6,4E-05 | 0,838 | 0,847 | 1 |
| Nsmce1    | 0,943003 | 0,014556 | 0,409 | 0,416 | 1 |
| Inafm1    | 0,943081 | 0,010552 | 0,101 | 0,101 | 1 |
| Grk6      | 0,943299 | -0,00828 | 0,167 | 0,167 | 1 |
| Jade3     | 0,943388 | 0,004307 | 0,033 | 0,034 | 1 |
| Ddx1      | 0,943501 | 0,006923 | 0,829 | 0,826 | 1 |
| Ick       | 0,943864 | 0,000408 | 0,571 | 0,576 | 1 |
| Ift43     | 0,943887 | -0,00389 | 0,594 | 0,571 | 1 |
| Rtn4r     | 0,943931 | -0,00098 | 0,043 | 0,044 | 1 |
| Atg16l2   | 0,944045 | -0,00153 | 0,048 | 0,049 | 1 |
| Polr2i    | 0,944214 | 0,017142 | 0,511 | 0,522 | 1 |
| Id4       | 0,94424  | -0,00349 | 0,107 | 0,107 | 1 |
| Pgc       | 0,944514 | 0,002345 | 0,017 | 0,016 | 1 |
| Nop56     | 0,944517 | 0,021218 | 0,505 | 0,525 | 1 |
| Jagn1     | 0,944618 | 0,016596 | 0,454 | 0,47  | 1 |
| 4933433G  | 0,94478  | 0,00332  | 0,022 | 0,021 | 1 |
| Bloc1s6   | 0,944799 | -0,00016 | 0,118 | 0,119 | 1 |
| Kpna1     | 0,944887 | -0,00418 | 0,388 | 0,389 | 1 |
| Wtip      | 0,945133 | 0,006498 | 0,036 | 0,036 | 1 |
| B230217C  | 0,945374 | 0,002913 | 0,181 | 0,182 | 1 |
| Supt16    | 0,945507 | 0,023506 | 0,614 | 0,615 | 1 |
| Shcbp1    | 0,94556  | 0,002686 | 0,021 | 0,021 | 1 |
| Ncoa1     | 0,945585 | 0,004596 | 0,371 | 0,376 | 1 |
| Gm42413   | 0,945635 | -0,00122 | 0,012 | 0,011 | 1 |
| Lrrc46    | 0,945635 | -0,00282 | 0,012 | 0,011 | 1 |
| Tmem2     | 0,945635 | -0,00055 | 0,012 | 0,011 | 1 |
| Hdac2     | 0,945678 | 0,005418 | 0,337 | 0,341 | 1 |
| Mtrf1l    | 0,945702 | -0,00431 | 0,135 | 0,133 | 1 |
| B3gat1    | 0,945719 | 0,001658 | 0,372 | 0,369 | 1 |
| Gm26606   | 0,94588  | 0,001709 | 0,017 | 0,016 | 1 |
| Zcchc4    | 0,946329 | -0,00096 | 0,121 | 0,122 | 1 |
| 0610037L1 | 0,946415 | 0,00416  | 0,467 | 0,47  | 1 |
| Ube2cbp   | 0,946465 | 0,001381 | 0,017 | 0,016 | 1 |

|           |          |          |       |       |   |
|-----------|----------|----------|-------|-------|---|
| Otud5     | 0,946782 | 0,002684 | 0,325 | 0,322 | 1 |
| Hipk3     | 0,946826 | 0,024141 | 0,37  | 0,382 | 1 |
| Agap1     | 0,94689  | -0,01054 | 0,98  | 0,974 | 1 |
| Ercc1     | 0,947548 | 0,012988 | 0,289 | 0,296 | 1 |
| Nt5c3     | 0,947749 | 0,007147 | 0,497 | 0,502 | 1 |
| Snx3      | 0,947786 | 0,008669 | 0,94  | 0,95  | 1 |
| Zfp358    | 0,947875 | 0,001055 | 0,245 | 0,247 | 1 |
| Gatb      | 0,947919 | 0,001315 | 0,129 | 0,127 | 1 |
| Tmem98    | 0,947935 | 0,017762 | 0,721 | 0,738 | 1 |
| Rbm19     | 0,947939 | -0,00316 | 0,139 | 0,14  | 1 |
| Cenpw     | 0,948148 | 0,002716 | 0,031 | 0,031 | 1 |
| Mn1       | 0,94824  | 0,002399 | 0,231 | 0,234 | 1 |
| Uggt2     | 0,948269 | 0,028063 | 0,131 | 0,132 | 1 |
| Mgmt      | 0,948691 | -0,00155 | 0,008 | 0,008 | 1 |
| Rom1      | 0,948704 | 0,004203 | 0,155 | 0,154 | 1 |
| Timm23    | 0,948824 | 0,003391 | 0,046 | 0,046 | 1 |
| Mthfd1    | 0,948912 | -0,00644 | 0,264 | 0,26  | 1 |
| Gm49353   | 0,948971 | -0,00189 | 0,008 | 0,008 | 1 |
| Gm16845   | 0,948971 | -0,00189 | 0,008 | 0,008 | 1 |
| Msx2      | 0,948971 | -0,00189 | 0,008 | 0,008 | 1 |
| Pdpk1     | 0,949048 | 0,011808 | 0,413 | 0,42  | 1 |
| Rundc3b   | 0,94929  | 0,003063 | 0,038 | 0,039 | 1 |
| Shq1      | 0,949462 | 0,001918 | 0,071 | 0,07  | 1 |
| Rnf24     | 0,949496 | 0,013018 | 0,158 | 0,159 | 1 |
| Oaz3      | 0,949531 | -0,00025 | 0,008 | 0,008 | 1 |
| Sox11     | 0,949538 | 0,069893 | 0,067 | 0,068 | 1 |
| Neu1      | 0,949592 | 0,008531 | 0,417 | 0,424 | 1 |
| Zfp712    | 0,949765 | -0,00178 | 0,058 | 0,059 | 1 |
| Galnt18   | 0,949782 | -0,00022 | 0,017 | 0,016 | 1 |
| Map2k3os  | 0,949782 | -0,00148 | 0,017 | 0,016 | 1 |
| Acat1     | 0,950085 | 0,001545 | 0,607 | 0,618 | 1 |
| St8sia4   | 0,950091 | -0,00252 | 0,008 | 0,008 | 1 |
| Cep128    | 0,950316 | -0,00141 | 0,102 | 0,101 | 1 |
| Tmem72    | 0,950563 | -0,00052 | 0,017 | 0,016 | 1 |
| Mrps18a   | 0,950731 | 0,003498 | 0,543 | 0,546 | 1 |
| Gm49042   | 0,950825 | 0,001424 | 0,026 | 0,026 | 1 |
| 8430432A  | 0,951211 | -0,00028 | 0,008 | 0,008 | 1 |
| Ccdc160   | 0,951211 | -0,00028 | 0,008 | 0,008 | 1 |
| Kcna3     | 0,951211 | -0,00028 | 0,008 | 0,008 | 1 |
| Fam149a   | 0,951211 | -0,00028 | 0,008 | 0,008 | 1 |
| Gm20687   | 0,951211 | -0,00028 | 0,008 | 0,008 | 1 |
| Hmga1b    | 0,951211 | -0,00028 | 0,008 | 0,008 | 1 |
| Galm      | 0,951211 | -0,00028 | 0,008 | 0,008 | 1 |
| Als2      | 0,951371 | 0,009031 | 0,122 | 0,122 | 1 |
| Brms1     | 0,951568 | -0,00193 | 0,385 | 0,387 | 1 |
| 1110012L1 | 0,951584 | 0,008552 | 0,194 | 0,198 | 1 |
| Btbd19    | 0,951677 | 0,005254 | 0,051 | 0,05  | 1 |
| Mrps18c   | 0,951728 | 0,00886  | 0,5   | 0,522 | 1 |
| Kcp       | 0,951733 | -0,00118 | 0,017 | 0,016 | 1 |
| Smim26    | 0,951805 | -0,004   | 0,659 | 0,665 | 1 |
| Zfp329    | 0,951912 | 0,012651 | 0,304 | 0,309 | 1 |
| Tmem251   | 0,95213  | 0,005871 | 0,201 | 0,2   | 1 |

|           |          |          |       |       |   |
|-----------|----------|----------|-------|-------|---|
| Atp8b2    | 0,952333 | 0,001486 | 0,036 | 0,036 | 1 |
| Mylpf     | 0,95238  | 0,00614  | 0,159 | 0,158 | 1 |
| Mcur1     | 0,952583 | -0,0101  | 0,191 | 0,19  | 1 |
| Gnrh1     | 0,952611 | 0,00264  | 0,008 | 0,008 | 1 |
| Gm15478   | 0,952611 | 0,001668 | 0,008 | 0,008 | 1 |
| Hk1os     | 0,952611 | 0,001668 | 0,008 | 0,008 | 1 |
| Ajuba     | 0,952611 | 0,000696 | 0,008 | 0,008 | 1 |
| Slc10a1   | 0,952611 | 0,000696 | 0,008 | 0,008 | 1 |
| Mgea5     | 0,953011 | 0,004751 | 0,68  | 0,694 | 1 |
| Odc1      | 0,953037 | 0,007293 | 0,272 | 0,276 | 1 |
| Cuedc2    | 0,953082 | 0,022562 | 0,826 | 0,841 | 1 |
| Eef1akmt4 | 0,9531   | -0,00181 | 0,017 | 0,016 | 1 |
| Cops7b    | 0,953457 | 0,007522 | 0,155 | 0,154 | 1 |
| Fam171a1  | 0,953543 | -0,00177 | 0,319 | 0,317 | 1 |
| Gm527     | 0,953576 | 0,001209 | 0,046 | 0,046 | 1 |
| Nup37     | 0,953584 | 0,000819 | 0,031 | 0,031 | 1 |
| Birc5     | 0,954012 | 0,001668 | 0,008 | 0,008 | 1 |
| Gm4724    | 0,954012 | 0,00361  | 0,008 | 0,008 | 1 |
| Iapp      | 0,954012 | 0,00264  | 0,008 | 0,008 | 1 |
| Sgk2      | 0,954059 | -0,00044 | 0,263 | 0,263 | 1 |
| Rasl11b   | 0,954073 | -0,02502 | 0,392 | 0,387 | 1 |
| Gm37459   | 0,954191 | 0,000795 | 0,026 | 0,026 | 1 |
| Dpy30     | 0,954215 | 0,002242 | 0,483 | 0,483 | 1 |
| A530017D: | 0,954228 | 0,005304 | 0,132 | 0,132 | 1 |
| Ncmap     | 0,954246 | 0,000494 | 0,026 | 0,026 | 1 |
| Suco      | 0,954389 | 0,016707 | 0,43  | 0,444 | 1 |
| Ctdspl    | 0,95469  | 0,005673 | 0,422 | 0,428 | 1 |
| Rnf152    | 0,954735 | 0,019826 | 0,169 | 0,172 | 1 |
| 4933406C: | 0,954777 | -0,00286 | 0,073 | 0,072 | 1 |
| Ppcs      | 0,954815 | 0,001626 | 0,071 | 0,07  | 1 |
| Lars      | 0,954917 | -0,0054  | 0,424 | 0,421 | 1 |
| Smap2     | 0,955176 | 0,003987 | 0,602 | 0,607 | 1 |
| Rbbp6     | 0,95518  | 0,060608 | 0,695 | 0,733 | 1 |
| Pxn       | 0,955509 | 0,008746 | 0,197 | 0,2   | 1 |
| Cd2ap     | 0,95552  | 0,007821 | 0,498 | 0,506 | 1 |
| Jakmip3   | 0,955523 | 0,002071 | 0,559 | 0,561 | 1 |
| Usp3      | 0,955631 | 0,007764 | 0,177 | 0,179 | 1 |
| 4930402H: | 0,955698 | -0,00711 | 0,957 | 0,977 | 1 |
| Bop1      | 0,955812 | 0,006373 | 0,247 | 0,25  | 1 |
| Ap4b1     | 0,955837 | 0,001315 | 0,129 | 0,13  | 1 |
| Tet2      | 0,956226 | 0,010194 | 0,311 | 0,312 | 1 |
| Pex11b    | 0,956262 | -0,00657 | 0,278 | 0,276 | 1 |
| Cep78     | 0,956297 | 0,000751 | 0,127 | 0,127 | 1 |
| Fam220a   | 0,956383 | 0,030678 | 0,496 | 0,506 | 1 |
| Rrp7a     | 0,956566 | 0,004908 | 0,492 | 0,491 | 1 |
| Tiprl     | 0,956602 | 0,008531 | 0,437 | 0,442 | 1 |
| Gtpbp6    | 0,956649 | 0,010296 | 0,361 | 0,363 | 1 |
| Nudt14    | 0,956688 | -0,00214 | 0,154 | 0,154 | 1 |
| Dmd       | 0,956747 | 0,013873 | 0,114 | 0,114 | 1 |
| Gm29083   | 0,956905 | 0,000274 | 0,046 | 0,046 | 1 |
| Gm2415    | 0,957022 | 0,004404 | 0,098 | 0,098 | 1 |
| Vars2     | 0,957034 | 0,002244 | 0,071 | 0,072 | 1 |

|            |          |          |       |       |   |
|------------|----------|----------|-------|-------|---|
| Zfp961     | 0,957179 | 0,004974 | 0,079 | 0,078 | 1 |
| Gm45847    | 0,957699 | 0,008026 | 0,051 | 0,052 | 1 |
| Xrcc4      | 0,957801 | -0,00056 | 0,257 | 0,259 | 1 |
| Mob1b      | 0,958041 | 0,011856 | 0,165 | 0,166 | 1 |
| Sap130     | 0,95858  | 0,000663 | 0,102 | 0,102 | 1 |
| 311000112  | 0,958919 | 0,001486 | 0,03  | 0,031 | 1 |
| Rnf126     | 0,959041 | 0,021892 | 0,368 | 0,384 | 1 |
| Mier2      | 0,959133 | 0,005871 | 0,181 | 0,18  | 1 |
| Bysl       | 0,959164 | 0,002044 | 0,17  | 0,171 | 1 |
| Vegfb      | 0,959169 | 0,019958 | 0,484 | 0,494 | 1 |
| Mybbp1a    | 0,959232 | 0,007426 | 0,425 | 0,421 | 1 |
| Larp6      | 0,959235 | 0,013422 | 0,806 | 0,813 | 1 |
| Cryzl1     | 0,959427 | -0,00152 | 0,531 | 0,52  | 1 |
| Tmem241    | 0,959457 | 0,010835 | 0,044 | 0,044 | 1 |
| Ndfip1     | 0,959465 | 0,032672 | 0,37  | 0,384 | 1 |
| Epas1      | 0,959486 | -0,00169 | 0,12  | 0,119 | 1 |
| Ncf2       | 0,959539 | 0,07347  | 0,026 | 0,026 | 1 |
| Rtf1       | 0,959623 | 0,009877 | 0,71  | 0,694 | 1 |
| Arhgef3    | 0,959786 | -0,00167 | 0,03  | 0,031 | 1 |
| Mllt1      | 0,959998 | 0,006152 | 0,144 | 0,146 | 1 |
| Gm26733    | 0,960026 | -0,002   | 0,031 | 0,031 | 1 |
| Eif5b      | 0,960133 | 0,0186   | 0,78  | 0,789 | 1 |
| 2300009A   | 0,96055  | 0,003903 | 0,261 | 0,265 | 1 |
| Pfkl       | 0,960725 | 0,007451 | 0,192 | 0,193 | 1 |
| Gm39469    | 0,960822 | -0,00141 | 0,098 | 0,099 | 1 |
| Zcchc11    | 0,960847 | 0,01999  | 0,425 | 0,439 | 1 |
| Dctn4      | 0,960913 | -0,01319 | 0,94  | 0,937 | 1 |
| 181003711  | 0,960955 | 0,011654 | 0,983 | 0,982 | 1 |
| Vbp1       | 0,961132 | 0,011626 | 0,86  | 0,883 | 1 |
| Gpr21      | 0,961243 | -0,00551 | 0,026 | 0,026 | 1 |
| Mterf1a    | 0,961253 | 0,010751 | 0,122 | 0,122 | 1 |
| Zfp937     | 0,961356 | -0,00478 | 0,063 | 0,063 | 1 |
| Rtn4ip1    | 0,961424 | -0,00043 | 0,08  | 0,081 | 1 |
| Fam131a    | 0,961435 | 0,007043 | 0,104 | 0,106 | 1 |
| Xrcc1      | 0,961496 | 0,011043 | 0,267 | 0,268 | 1 |
| Klh19      | 0,961723 | -0,02161 | 0,44  | 0,436 | 1 |
| Rab1a      | 0,961776 | 0,001853 | 0,605 | 0,61  | 1 |
| Ccdc117    | 0,962087 | 0,013748 | 0,234 | 0,236 | 1 |
| Hmgb3      | 0,962116 | -0,00294 | 0,095 | 0,096 | 1 |
| Ankrd50    | 0,9622   | -0,00447 | 0,16  | 0,161 | 1 |
| Faap24     | 0,962211 | 0,002155 | 0,131 | 0,132 | 1 |
| AC161376.  | 0,962407 | -0,00065 | 0,26  | 0,26  | 1 |
| Rnh1       | 0,962588 | -0,00693 | 0,567 | 0,556 | 1 |
| Star       | 0,96282  | 0,001445 | 0,03  | 0,031 | 1 |
| Bicd1      | 0,96304  | 0,010648 | 0,658 | 0,637 | 1 |
| Gm14412    | 0,96314  | 0,003063 | 0,039 | 0,039 | 1 |
| Zfp763     | 0,963181 | -0,00524 | 0,097 | 0,096 | 1 |
| Gon7       | 0,963192 | 0,017979 | 0,133 | 0,135 | 1 |
| Pou5f2     | 0,963339 | -0,00014 | 0,078 | 0,078 | 1 |
| Mgat2      | 0,963495 | 0,015427 | 0,304 | 0,311 | 1 |
| Fbxo36     | 0,963661 | -0,00639 | 0,28  | 0,276 | 1 |
| St6galnac4 | 0,963833 | 0,001768 | 0,03  | 0,031 | 1 |

|           |          |          |       |       |   |
|-----------|----------|----------|-------|-------|---|
| Rps13     | 0,964095 | 0,0008   | 0,993 | 0,992 | 1 |
| Zbed4     | 0,964154 | 0,002912 | 0,093 | 0,093 | 1 |
| Trit1     | 0,964292 | -0,0045  | 0,065 | 0,065 | 1 |
| Prdm5     | 0,964369 | -0,00349 | 0,171 | 0,169 | 1 |
| Plcb1     | 0,964416 | 0,006504 | 0,026 | 0,026 | 1 |
| Irak1     | 0,964452 | 0,009589 | 0,299 | 0,301 | 1 |
| Blvra     | 0,964531 | -0,02033 | 0,324 | 0,315 | 1 |
| Ninl      | 0,964573 | 0,007452 | 0,026 | 0,026 | 1 |
| Tamm41    | 0,964651 | -0,00068 | 0,087 | 0,088 | 1 |
| Mrps36    | 0,964864 | 0,008282 | 0,556 | 0,556 | 1 |
| Zfp579    | 0,964972 | 0,004094 | 0,399 | 0,403 | 1 |
| Akr1a1    | 0,965079 | 0,011581 | 0,929 | 0,924 | 1 |
| Uba6      | 0,96509  | 0,02216  | 0,303 | 0,314 | 1 |
| Mfhas1    | 0,965197 | -0,0016  | 0,04  | 0,041 | 1 |
| Dock2     | 0,965488 | -0,00025 | 0,013 | 0,013 | 1 |
| Fgd3      | 0,965538 | 0,007385 | 0,231 | 0,231 | 1 |
| Zfp799    | 0,965622 | -0,00774 | 0,148 | 0,146 | 1 |
| Frg2f1    | 0,965659 | 0,000519 | 0,035 | 0,036 | 1 |
| Gm10073   | 0,965877 | -0,00185 | 0,05  | 0,05  | 1 |
| Adat1     | 0,965975 | 0,002417 | 0,119 | 0,12  | 1 |
| Map7      | 0,966109 | -0,00309 | 0,993 | 0,998 | 1 |
| Atg4b     | 0,966308 | 0,013465 | 0,36  | 0,366 | 1 |
| Bard1     | 0,966373 | 0,002017 | 0,013 | 0,013 | 1 |
| Mtpap     | 0,966724 | 0,013278 | 0,271 | 0,276 | 1 |
| Sumo2     | 0,967005 | 0,006415 | 0,917 | 0,901 | 1 |
| Pdcd4     | 0,967147 | 0,019548 | 0,379 | 0,384 | 1 |
| Zfp867    | 0,967204 | -0,00286 | 0,041 | 0,041 | 1 |
| Amot      | 0,967257 | 0,000721 | 0,013 | 0,013 | 1 |
| 170004711 | 0,967257 | 0,000721 | 0,013 | 0,013 | 1 |
| Gm19412   | 0,967257 | 0,000721 | 0,013 | 0,013 | 1 |
| Slc38a3   | 0,967342 | 0,008774 | 0,093 | 0,093 | 1 |
| Brdt      | 0,967369 | -0,01291 | 0,323 | 0,315 | 1 |
| Elk4      | 0,967373 | 0,014892 | 0,362 | 0,367 | 1 |
| Dnaaf2    | 0,967415 | -0,00804 | 0,027 | 0,028 | 1 |
| Rgl2      | 0,967643 | 0,00614  | 0,175 | 0,174 | 1 |
| Lsm7      | 0,967861 | 0,010797 | 0,6   | 0,62  | 1 |
| B3galt6   | 0,96788  | 0,003336 | 0,14  | 0,14  | 1 |
| Ctdspl2   | 0,968062 | 0,007455 | 0,321 | 0,328 | 1 |
| Cbs       | 0,968377 | -0,02748 | 0,213 | 0,211 | 1 |
| Tedc1     | 0,968436 | -0,00182 | 0,055 | 0,055 | 1 |
| Mon1b     | 0,968451 | 0,000421 | 0,17  | 0,169 | 1 |
| Nudt19    | 0,968734 | 0,007194 | 0,351 | 0,353 | 1 |
| Mak16     | 0,968869 | 0,006832 | 0,284 | 0,286 | 1 |
| Spata2l   | 0,969163 | 0,006801 | 0,044 | 0,044 | 1 |
| Sorcs2    | 0,96969  | 0,002017 | 0,013 | 0,013 | 1 |
| Shbg      | 0,96969  | 0,002017 | 0,013 | 0,013 | 1 |
| Ptp4a2    | 0,969835 | 0,016676 | 0,931 | 0,928 | 1 |
| Adhfe1    | 0,96989  | 0,003695 | 0,044 | 0,044 | 1 |
| Umad1     | 0,969897 | -0,00393 | 0,169 | 0,167 | 1 |
| Exoc2     | 0,9701   | 0,00487  | 0,245 | 0,247 | 1 |
| Gm15834   | 0,970556 | -0,00181 | 0,018 | 0,018 | 1 |
| AC123724. | 0,971062 | 0,00524  | 0,03  | 0,031 | 1 |

|           |          |          |       |       |   |
|-----------|----------|----------|-------|-------|---|
| Ogg1      | 0,971188 | 0,002977 | 0,116 | 0,115 | 1 |
| Gm48678   | 0,97121  | 0,0107   | 0,03  | 0,031 | 1 |
| Nfe2l2    | 0,971213 | -0,02559 | 0,512 | 0,504 | 1 |
| Rnasek    | 0,971468 | 0,003695 | 0,044 | 0,044 | 1 |
| Fam3a     | 0,971634 | 0,000464 | 0,302 | 0,302 | 1 |
| Trio      | 0,97168  | 0,004909 | 0,013 | 0,013 | 1 |
| H2-Q10    | 0,97168  | 0,006191 | 0,013 | 0,013 | 1 |
| Elf2      | 0,971756 | -0,00935 | 0,561 | 0,546 | 1 |
| Dffa      | 0,971874 | 0,006697 | 0,156 | 0,158 | 1 |
| 6430503K  | 0,971984 | -0,00169 | 0,174 | 0,174 | 1 |
| Ei24      | 0,97202  | -0,0022  | 0,677 | 0,667 | 1 |
| Fra10ac1  | 0,972157 | 0,005119 | 0,25  | 0,252 | 1 |
| Tgfb3     | 0,972265 | 0,006425 | 0,147 | 0,15  | 1 |
| Sgms2     | 0,972552 | -0,00342 | 0,133 | 0,133 | 1 |
| Plekha4   | 0,972565 | 0,00555  | 0,013 | 0,013 | 1 |
| Hmga1     | 0,972628 | 0,00437  | 0,077 | 0,076 | 1 |
| Cep83     | 0,972928 | -0,00342 | 0,237 | 0,234 | 1 |
| Acaa1a    | 0,973182 | 0,010203 | 0,905 | 0,904 | 1 |
| Sh3bgrl   | 0,97321  | -0,00387 | 0,318 | 0,317 | 1 |
| Them6     | 0,973215 | -0,00509 | 0,116 | 0,115 | 1 |
| Mplkip    | 0,97329  | 0,016159 | 0,291 | 0,296 | 1 |
| Faap100   | 0,973326 | 0,004086 | 0,225 | 0,224 | 1 |
| Zfp574    | 0,973485 | -0,00525 | 0,125 | 0,125 | 1 |
| Nmt2      | 0,973581 | 0,01281  | 0,263 | 0,267 | 1 |
| Gm13054   | 0,973764 | 0,000442 | 0,018 | 0,018 | 1 |
| D6Wsu163  | 0,973765 | -0,00581 | 0,126 | 0,125 | 1 |
| Esf1      | 0,973822 | -0,01344 | 0,47  | 0,47  | 1 |
| Slc25a23  | 0,973854 | 0,01783  | 0,608 | 0,62  | 1 |
| Ddx41     | 0,97402  | 0,003804 | 0,223 | 0,224 | 1 |
| Fkbp9     | 0,974061 | -0,00338 | 0,189 | 0,189 | 1 |
| Fbxl6     | 0,97425  | 0,003038 | 0,138 | 0,138 | 1 |
| Zfp931    | 0,974338 | 0,003247 | 0,106 | 0,106 | 1 |
| Edrf1     | 0,974362 | 0,01238  | 0,165 | 0,166 | 1 |
| Stx17     | 0,974574 | 0,005871 | 0,386 | 0,389 | 1 |
| Ubxn8     | 0,974651 | 0,019326 | 0,202 | 0,207 | 1 |
| Adamts1   | 0,974766 | 0,090173 | 0,358 | 0,363 | 1 |
| Gm45509   | 0,974807 | 0,013217 | 0,053 | 0,054 | 1 |
| Sh3yl1    | 0,974892 | 0,00069  | 0,064 | 0,063 | 1 |
| Commd9    | 0,975122 | 0,0037   | 0,511 | 0,535 | 1 |
| Rfx1      | 0,975126 | 0,005871 | 0,088 | 0,089 | 1 |
| Phf20l1   | 0,975395 | 0,019644 | 0,643 | 0,662 | 1 |
| Atp6v0d1  | 0,975424 | 0,00544  | 0,873 | 0,872 | 1 |
| Pigb      | 0,975787 | 0,005282 | 0,09  | 0,091 | 1 |
| Syt4      | 0,975811 | 0,031402 | 0,025 | 0,024 | 1 |
| Rfng      | 0,975822 | 0,018848 | 0,181 | 0,184 | 1 |
| 1700029l1 | 0,97584  | 0,001402 | 0,018 | 0,018 | 1 |
| Rsu1      | 0,975845 | 0,000434 | 0,775 | 0,763 | 1 |
| Zfp687    | 0,976029 | 0,004881 | 0,258 | 0,259 | 1 |
| Cmtr2     | 0,976044 | 0,000326 | 0,054 | 0,054 | 1 |
| Zmat1     | 0,976046 | 0,018332 | 0,351 | 0,358 | 1 |
| Rsf1      | 0,976169 | -0,00909 | 0,75  | 0,754 | 1 |
| Raly      | 0,97625  | 0,006085 | 0,877 | 0,888 | 1 |



|           |          |          |       |       |   |
|-----------|----------|----------|-------|-------|---|
| Ccdc157   | 0,976322 | 0,007958 | 0,08  | 0,081 | 1 |
| Psmc1     | 0,976385 | -0,00314 | 0,735 | 0,74  | 1 |
| Txndc15   | 0,976445 | 0,003975 | 0,691 | 0,685 | 1 |
| Slc41a2   | 0,976492 | 0,001806 | 0,039 | 0,039 | 1 |
| Gadd45a   | 0,976729 | 0,032638 | 0,342 | 0,351 | 1 |
| Rora      | 0,976735 | 0,002329 | 0,295 | 0,293 | 1 |
| Zfp960    | 0,976783 | 0,001075 | 0,018 | 0,018 | 1 |
| Isoc1     | 0,976797 | -0,00275 | 0,084 | 0,085 | 1 |
| Zfp874b   | 0,976833 | 0,013221 | 0,169 | 0,169 | 1 |
| Aaed1     | 0,976921 | -0,00399 | 0,269 | 0,267 | 1 |
| Thada     | 0,976957 | 0,015037 | 0,121 | 0,122 | 1 |
| Hpf1      | 0,977007 | -0,00134 | 0,5   | 0,496 | 1 |
| Map4      | 0,977013 | 0,008657 | 0,802 | 0,815 | 1 |
| Cbfa2t2   | 0,977026 | 0,004628 | 0,253 | 0,255 | 1 |
| Mbd6      | 0,977039 | 0,006795 | 0,314 | 0,317 | 1 |
| Plbd2     | 0,977194 | 0,007869 | 0,43  | 0,429 | 1 |
| 4930480K  | 0,97737  | -0,00057 | 0,054 | 0,054 | 1 |
| Sh3bgrl3  | 0,977697 | 0,000153 | 0,988 | 0,995 | 1 |
| Ssbp3     | 0,977728 | 0,020801 | 0,365 | 0,374 | 1 |
| Ergic2    | 0,977824 | -0,00653 | 0,628 | 0,613 | 1 |
| Klhl12    | 0,978007 | 0,001055 | 0,219 | 0,22  | 1 |
| Tgfb1     | 0,978104 | 0,004592 | 0,018 | 0,018 | 1 |
| Scg5      | 0,978208 | 0,035492 | 0,674 | 0,712 | 1 |
| Umps      | 0,978362 | -0,00252 | 0,112 | 0,112 | 1 |
| Clcn2     | 0,978391 | 0,00203  | 0,373 | 0,376 | 1 |
| Psmg2     | 0,978467 | 0,014455 | 0,267 | 0,272 | 1 |
| Lonrf3    | 0,978596 | 0,004913 | 0,02  | 0,02  | 1 |
| 1810030O  | 0,978657 | 0,017524 | 0,27  | 0,273 | 1 |
| Tnfrsf13c | 0,978679 | -0,00096 | 0,084 | 0,085 | 1 |
| Arl4d     | 0,978735 | -0,00425 | 0,242 | 0,241 | 1 |
| Rnf8      | 0,978887 | 0,005336 | 0,189 | 0,19  | 1 |
| Nsdhl     | 0,979251 | 0,000669 | 0,281 | 0,281 | 1 |
| Gm44386   | 0,979313 | 0,005871 | 0,112 | 0,112 | 1 |
| Pold1     | 0,979354 | -0,0053  | 0,118 | 0,117 | 1 |
| Cd99l2    | 0,979781 | -0,00234 | 0,338 | 0,333 | 1 |
| Slc25a33  | 0,979962 | -0,00348 | 0,161 | 0,161 | 1 |
| Chtf18    | 0,980035 | 0,00332  | 0,02  | 0,02  | 1 |
| Asic3     | 0,98018  | 0,002671 | 0,018 | 0,018 | 1 |
| Tmub2     | 0,98022  | 0,011507 | 0,386 | 0,393 | 1 |
| Dus4l     | 0,980354 | 0,002989 | 0,113 | 0,114 | 1 |
| Ddx49     | 0,980498 | -0,00623 | 0,261 | 0,26  | 1 |
| Wasf1     | 0,980683 | -0,00604 | 0,317 | 0,317 | 1 |
| 4831440E1 | 0,980754 | 0,002996 | 0,02  | 0,02  | 1 |
| Usp1      | 0,980797 | 0,013082 | 0,351 | 0,358 | 1 |
| Eya4      | 0,980961 | 0,027983 | 0,211 | 0,216 | 1 |
| Mrpl11    | 0,980989 | 0,004184 | 0,503 | 0,512 | 1 |
| Slc22a5   | 0,981238 | -0,00775 | 0,17  | 0,169 | 1 |
| Wdr89     | 0,981255 | 0,01238  | 0,182 | 0,184 | 1 |
| Stx5a     | 0,981535 | 0,009304 | 0,531 | 0,537 | 1 |
| Npepl1    | 0,98163  | 0,016947 | 0,272 | 0,278 | 1 |
| Arih2     | 0,981634 | 0,005647 | 0,344 | 0,345 | 1 |
| Cc2d2a    | 0,9817   | 0,014213 | 0,197 | 0,2   | 1 |

|           |          |          |       |       |   |
|-----------|----------|----------|-------|-------|---|
| Psmb1     | 0,981758 | 0,00852  | 0,956 | 0,938 | 1 |
| 9130221H: | 0,981779 | 0,001466 | 0,034 | 0,034 | 1 |
| Sec23b    | 0,981829 | 0,004225 | 0,429 | 0,429 | 1 |
| Slain2    | 0,982077 | 0,014133 | 0,341 | 0,343 | 1 |
| Olfr46    | 0,982141 | 0,001768 | 0,029 | 0,029 | 1 |
| Htra1     | 0,982172 | 0,004528 | 0,768 | 0,74  | 1 |
| Ybey      | 0,982232 | 0,009909 | 0,105 | 0,106 | 1 |
| Bzw1      | 0,982352 | -0,00045 | 0,93  | 0,912 | 1 |
| 6430573F1 | 0,982381 | 0,00276  | 0,045 | 0,046 | 1 |
| Cend1     | 0,982418 | 0,014637 | 0,411 | 0,418 | 1 |
| Cdc16     | 0,982436 | 0,005871 | 0,329 | 0,328 | 1 |
| Syne2     | 0,982447 | 0,007884 | 0,182 | 0,182 | 1 |
| Fancg     | 0,982515 | 0,007347 | 0,097 | 0,098 | 1 |
| Abhd3     | 0,982596 | -0,01182 | 0,28  | 0,276 | 1 |
| Idua      | 0,982736 | 0,000938 | 0,11  | 0,111 | 1 |
| Lpgat1    | 0,982884 | 0,025414 | 0,902 | 0,915 | 1 |
| Arf6      | 0,983046 | 0,012086 | 0,255 | 0,259 | 1 |
| Itga4     | 0,983161 | 0,015449 | 0,076 | 0,076 | 1 |
| Mtor      | 0,983281 | 0,004152 | 0,27  | 0,27  | 1 |
| Zfp771    | 0,983574 | 0,036966 | 0,77  | 0,767 | 1 |
| Mier3     | 0,983942 | -0,00323 | 0,234 | 0,233 | 1 |
| Slc35f5   | 0,983963 | 0,002121 | 0,187 | 0,189 | 1 |
| Aamp      | 0,984006 | -0,00648 | 0,895 | 0,912 | 1 |
| Gatd1     | 0,98406  | 0,004236 | 0,312 | 0,312 | 1 |
| Atp8b5    | 0,984164 | 0,002597 | 0,082 | 0,083 | 1 |
| Rbak      | 0,984479 | 0,018244 | 0,198 | 0,203 | 1 |
| Prcp      | 0,984521 | 0,006094 | 0,336 | 0,343 | 1 |
| Tmem17    | 0,984537 | 0,009159 | 0,083 | 0,085 | 1 |
| Stag1     | 0,984647 | 0,033285 | 0,475 | 0,499 | 1 |
| Sppl3     | 0,984708 | 0,01558  | 0,421 | 0,429 | 1 |
| Snhg18    | 0,985146 | 0,005266 | 0,068 | 0,068 | 1 |
| Senp1     | 0,985224 | 0,006601 | 0,256 | 0,257 | 1 |
| Sh3bp4    | 0,985937 | 0,000401 | 0,065 | 0,065 | 1 |
| Anapc10   | 0,985968 | 0,00144  | 0,207 | 0,207 | 1 |
| Nav1      | 0,986045 | 0,020413 | 0,587 | 0,587 | 1 |
| Yars2     | 0,986091 | -0,0029  | 0,129 | 0,128 | 1 |
| Eid1      | 0,986277 | 0,009967 | 0,977 | 0,987 | 1 |
| Atp9b     | 0,986285 | 0,007298 | 0,285 | 0,286 | 1 |
| 4930550C: | 0,986509 | 0,000442 | 0,02  | 0,02  | 1 |
| Dvl3      | 0,986591 | 0,010558 | 0,342 | 0,345 | 1 |
| Morc3     | 0,986698 | -0,00874 | 0,234 | 0,233 | 1 |
| Adprhl2   | 0,986891 | 0,005171 | 0,328 | 0,33  | 1 |
| Clk2      | 0,986912 | 0,00511  | 0,235 | 0,237 | 1 |
| Rab3a     | 0,987054 | -0,01541 | 0,524 | 0,515 | 1 |
| Vstm2b    | 0,987154 | 0,001052 | 0,015 | 0,015 | 1 |
| Mfsd9     | 0,987338 | -0,00043 | 0,032 | 0,033 | 1 |
| Lmtk3     | 0,987534 | -0,00214 | 0,047 | 0,047 | 1 |
| Zfp790    | 0,987675 | 0,00014  | 0,075 | 0,075 | 1 |
| Usp45     | 0,987684 | 0,010717 | 0,165 | 0,166 | 1 |
| Tomm6os   | 0,988103 | 0,002968 | 0,01  | 0,01  | 1 |
| D7Ert443  | 0,988151 | 0,001989 | 0,622 | 0,626 | 1 |
| Tbc1d20   | 0,988155 | 0,017947 | 0,309 | 0,315 | 1 |

|           |          |          |       |       |   |
|-----------|----------|----------|-------|-------|---|
| Lca5      | 0,988232 | 0,003224 | 0,091 | 0,091 | 1 |
| Ccdc25    | 0,98832  | 0,002594 | 0,288 | 0,291 | 1 |
| Acsf3     | 0,98844  | -0,00071 | 0,084 | 0,085 | 1 |
| Zfp772    | 0,988944 | 0,004009 | 0,047 | 0,047 | 1 |
| Lrsam1    | 0,989008 | 0,005871 | 0,139 | 0,14  | 1 |
| Tmem69    | 0,989295 | 0,003414 | 0,055 | 0,055 | 1 |
| Emsy      | 0,989343 | 0,018139 | 0,56  | 0,571 | 1 |
| Arhgef19  | 0,98962  | 0,016014 | 0,071 | 0,072 | 1 |
| Gm26668   | 0,989622 | 0,001028 | 0,01  | 0,01  | 1 |
| Gm10353   | 0,989622 | 0,001028 | 0,01  | 0,01  | 1 |
| Zfp507    | 0,989954 | 0,006409 | 0,182 | 0,184 | 1 |
| Bmf       | 0,989956 | 0,013839 | 0,05  | 0,05  | 1 |
| Efr3a     | 0,990042 | -0,00746 | 0,298 | 0,298 | 1 |
| 443040211 | 0,990262 | -0,00055 | 0,015 | 0,015 | 1 |
| Gm26526   | 0,990283 | 0,002925 | 0,267 | 0,27  | 1 |
| Rdx       | 0,990459 | 0,003092 | 0,998 | 0,998 | 1 |
| Gm21663   | 0,990634 | 0,00039  | 0,01  | 0,01  | 1 |
| Ctbp2     | 0,990634 | 0,00039  | 0,01  | 0,01  | 1 |
| Gm32369   | 0,990634 | 0,00039  | 0,01  | 0,01  | 1 |
| Anapc1    | 0,99089  | 0,007309 | 0,4   | 0,407 | 1 |
| Arfrp1    | 0,99097  | -0,00348 | 0,388 | 0,385 | 1 |
| Antxr1    | 0,991048 | 0,003819 | 0,094 | 0,094 | 1 |
| Adarb1    | 0,991091 | 0,000746 | 0,015 | 0,015 | 1 |
| Trim17    | 0,99114  | 5,69E-05 | 0,01  | 0,01  | 1 |
| Aard      | 0,99114  | 5,69E-05 | 0,01  | 0,01  | 1 |
| Arid1a    | 0,99124  | 0,002316 | 0,653 | 0,654 | 1 |
| Ppm1b     | 0,991271 | 0,005696 | 0,525 | 0,535 | 1 |
| Rab5c     | 0,991296 | 0,00598  | 0,846 | 0,86  | 1 |
| Atxn1l    | 0,9913   | -0,00605 | 0,228 | 0,226 | 1 |
| Pik3r1    | 0,991482 | 0,014259 | 0,964 | 0,976 | 1 |
| Bcl2l12   | 0,991742 | 0,002626 | 0,092 | 0,093 | 1 |
| Tcaf2     | 0,991787 | 0,00198  | 0,005 | 0,005 | 1 |
| Pmel      | 0,991787 | 0,00198  | 0,005 | 0,005 | 1 |
| Htr1b     | 0,991787 | 0,00198  | 0,005 | 0,005 | 1 |
| Serpinf1  | 0,991787 | 0,00198  | 0,005 | 0,005 | 1 |
| Calhm2    | 0,991787 | 0,00198  | 0,005 | 0,005 | 1 |
| Atrip     | 0,991938 | 0,003164 | 0,171 | 0,171 | 1 |
| Calr      | 0,991978 | 0,009321 | 0,98  | 0,99  | 1 |
| Wars2     | 0,992039 | 0,001863 | 0,057 | 0,057 | 1 |
| Eif1a     | 0,992073 | 0,027073 | 0,276 | 0,281 | 1 |
| Spocd1    | 0,992153 | -0,00058 | 0,01  | 0,01  | 1 |
| Btaf1     | 0,992189 | 0,026879 | 0,276 | 0,285 | 1 |
| Fbxo32    | 0,992246 | 0,014723 | 0,731 | 0,743 | 1 |
| Ctbp1     | 0,992288 | 0,00105  | 0,851 | 0,854 | 1 |
| Plcxd1    | 0,992501 | 0,001337 | 0,005 | 0,005 | 1 |
| Ldb3      | 0,992799 | -0,00055 | 0,272 | 0,27  | 1 |
| Bbip1     | 0,992826 | 0,010982 | 0,628 | 0,652 | 1 |
| Tceal5    | 0,992858 | 0,001005 | 0,005 | 0,005 | 1 |
| Fam151a   | 0,992858 | 0,001005 | 0,005 | 0,005 | 1 |
| Parva     | 0,992858 | 0,001005 | 0,005 | 0,005 | 1 |
| Scamp4    | 0,992858 | 0,001005 | 0,005 | 0,005 | 1 |
| Sh2d4b    | 0,992858 | 0,001005 | 0,005 | 0,005 | 1 |

|           |          |          |       |       |   |
|-----------|----------|----------|-------|-------|---|
| Gm34934   | 0,992858 | 0,001005 | 0,005 | 0,005 | 1 |
| Gm34868   | 0,992858 | 0,001005 | 0,005 | 0,005 | 1 |
| Amhr2     | 0,992858 | 0,001005 | 0,005 | 0,005 | 1 |
| Gm15956   | 0,992858 | 0,001005 | 0,005 | 0,005 | 1 |
| Tesmin    | 0,992858 | 0,001005 | 0,005 | 0,005 | 1 |
| Kif11     | 0,992858 | 0,001005 | 0,005 | 0,005 | 1 |
| Nt5c3b    | 0,993224 | -0,00389 | 0,281 | 0,278 | 1 |
| Med29     | 0,99328  | -0,003   | 0,382 | 0,379 | 1 |
| Magi3     | 0,993321 | -0,00217 | 0,044 | 0,044 | 1 |
| Gm10791   | 0,993388 | 0,002709 | 0,101 | 0,101 | 1 |
| Kras      | 0,993393 | 0,000608 | 0,509 | 0,504 | 1 |
| Map3k20   | 0,993672 | -0,00155 | 0,01  | 0,01  | 1 |
| Hirip3    | 0,993757 | 0,021258 | 0,181 | 0,184 | 1 |
| Ahr       | 0,993801 | 0,006188 | 0,023 | 0,023 | 1 |
| Itfg1     | 0,993813 | 0,007405 | 0,753 | 0,764 | 1 |
| Slc7a6    | 0,993815 | 0,009101 | 0,098 | 0,099 | 1 |
| Ccdc137   | 0,993846 | 0,004517 | 0,17  | 0,171 | 1 |
| 3110035E1 | 0,993929 | 2,86E-05 | 0,005 | 0,005 | 1 |
| Kn1       | 0,993929 | 2,86E-05 | 0,005 | 0,005 | 1 |
| Gm42957   | 0,993929 | 2,86E-05 | 0,005 | 0,005 | 1 |
| Glipr2    | 0,993929 | 2,86E-05 | 0,005 | 0,005 | 1 |
| Gm43660   | 0,993929 | 2,86E-05 | 0,005 | 0,005 | 1 |
| Nos1      | 0,993929 | 2,86E-05 | 0,005 | 0,005 | 1 |
| Ache      | 0,993929 | 2,86E-05 | 0,005 | 0,005 | 1 |
| 2900089D  | 0,993929 | 2,86E-05 | 0,005 | 0,005 | 1 |
| Rasgrp4   | 0,993929 | 2,86E-05 | 0,005 | 0,005 | 1 |
| Gm4353    | 0,993929 | 2,86E-05 | 0,005 | 0,005 | 1 |
| Gm49083   | 0,993929 | 2,86E-05 | 0,005 | 0,005 | 1 |
| Lingo1    | 0,993929 | 2,86E-05 | 0,005 | 0,005 | 1 |
| Camkv     | 0,993929 | 2,86E-05 | 0,005 | 0,005 | 1 |
| 4833445I0 | 0,993929 | 2,86E-05 | 0,005 | 0,005 | 1 |
| Gm46332   | 0,993929 | 2,86E-05 | 0,005 | 0,005 | 1 |
| 9030624G  | 0,993929 | 2,86E-05 | 0,005 | 0,005 | 1 |
| D430001F  | 0,993929 | 2,86E-05 | 0,005 | 0,005 | 1 |
| Ndc80     | 0,993929 | 2,86E-05 | 0,005 | 0,005 | 1 |
| Rasgrp2   | 0,993929 | 2,86E-05 | 0,005 | 0,005 | 1 |
| Rsad1     | 0,993973 | -0,0022  | 0,079 | 0,078 | 1 |
| Il2       | 0,994038 | -0,00367 | 0,054 | 0,054 | 1 |
| Rprm      | 0,994286 | 0,000363 | 0,005 | 0,005 | 1 |
| Ahcy      | 0,994346 | 0,000843 | 0,037 | 0,037 | 1 |
| Aimp2     | 0,994587 | 0,024171 | 0,291 | 0,302 | 1 |
| Gm11851   | 0,994643 | -0,00061 | 0,005 | 0,005 | 1 |
| Pitpnc1   | 0,994643 | -0,00061 | 0,005 | 0,005 | 1 |
| Prkab1    | 0,994691 | 0,00674  | 0,115 | 0,115 | 1 |
| Gm26909   | 0,994773 | 0,009185 | 0,149 | 0,151 | 1 |
| S100a3    | 0,995    | -0,00286 | 0,005 | 0,005 | 1 |
| Pigu      | 0,995088 | 0,006516 | 0,379 | 0,384 | 1 |
| Ppan      | 0,995147 | 0,01466  | 0,162 | 0,164 | 1 |
| Thns1     | 0,995276 | 4,48E-05 | 0,151 | 0,151 | 1 |
| Gps1      | 0,995294 | 0,009727 | 0,631 | 0,66  | 1 |
| Gal3st1   | 0,9955   | 0,012449 | 0,949 | 0,94  | 1 |
| Pitrm1    | 0,995566 | 0,004099 | 0,094 | 0,094 | 1 |

|           |          |          |       |       |   |
|-----------|----------|----------|-------|-------|---|
| Tbcc      | 0,99563  | -0,00155 | 0,286 | 0,286 | 1 |
| Gm21988   | 0,995671 | 0,002859 | 0,079 | 0,08  | 1 |
| Prpf3     | 0,9957   | 0,016386 | 0,157 | 0,159 | 1 |
| Ccdc190   | 0,995715 | -0,00159 | 0,005 | 0,005 | 1 |
| Gm11261   | 0,995715 | -0,00159 | 0,005 | 0,005 | 1 |
| Msantd1   | 0,995715 | -0,00159 | 0,005 | 0,005 | 1 |
| Rbfox3    | 0,995715 | -0,00159 | 0,005 | 0,005 | 1 |
| Gm29675   | 0,995715 | -0,00159 | 0,005 | 0,005 | 1 |
| C030017Df | 0,995715 | -0,00159 | 0,005 | 0,005 | 1 |
| Pcdhga1   | 0,995715 | -0,00159 | 0,005 | 0,005 | 1 |
| Dlg5      | 0,995858 | 0,01004  | 0,201 | 0,203 | 1 |
| Stk17b    | 0,995941 | -0,00259 | 0,072 | 0,072 | 1 |
| Plxnb3    | 0,996111 | 0,003547 | 0,697 | 0,704 | 1 |
| Fbxo38    | 0,996333 | 0,007804 | 0,284 | 0,288 | 1 |
| Thap3     | 0,996573 | 0,004353 | 0,372 | 0,376 | 1 |
| Ttyh3     | 0,996732 | -0,00163 | 0,143 | 0,143 | 1 |
| Evl       | 0,996858 | 0,000326 | 0,052 | 0,052 | 1 |
| Chil1     | 0,996942 | 0,001825 | 0,047 | 0,047 | 1 |
| Stoml2    | 0,997078 | 0,005447 | 0,401 | 0,403 | 1 |
| Dpy19l4   | 0,997173 | 0,024876 | 0,386 | 0,402 | 1 |
| Rbl1      | 0,9975   | -0,0032  | 0,005 | 0,005 | 1 |
| Cyb5b     | 0,997946 | 0,03135  | 0,413 | 0,431 | 1 |
| Hnrnpul2  | 0,997951 | 0,003639 | 0,703 | 0,704 | 1 |
| Kpna2     | 0,99798  | 0,000913 | 0,052 | 0,052 | 1 |
| Necap2    | 0,998138 | 0,005237 | 0,612 | 0,624 | 1 |
| Ap3d1     | 0,998203 | 0,015378 | 0,425 | 0,428 | 1 |
| B230344G  | 0,998204 | -0,01094 | 0,14  | 0,138 | 1 |
| Tbc1d19   | 0,99824  | 0,014592 | 0,279 | 0,283 | 1 |
| Mcrs1     | 0,998663 | -0,01014 | 0,468 | 0,465 | 1 |
| Zdhhc14   | 0,998702 | -0,00439 | 0,692 | 0,678 | 1 |
| 1700088E  | 0,998798 | 0,004949 | 0,055 | 0,055 | 1 |
| Prrc2a    | 0,99883  | 0,023902 | 0,686 | 0,688 | 1 |
| Cxxc1     | 0,998898 | 0,016667 | 0,321 | 0,328 | 1 |
| Thap12    | 0,998984 | -0,01763 | 0,364 | 0,359 | 1 |
| MacroD1   | 0,998987 | 0,003695 | 0,366 | 0,366 | 1 |
| Cdk12     | 0,99909  | 0,010147 | 0,593 | 0,608 | 1 |
| Smarcad1  | 0,999218 | 0,013974 | 0,329 | 0,333 | 1 |
| Slc26a2   | 0,999268 | 0,01613  | 0,167 | 0,169 | 1 |
| Spata31d1 | 0,999282 | 0,006411 | 0,176 | 0,177 | 1 |
| Atm       | 0,99936  | -0,00038 | 0,238 | 0,237 | 1 |
| Nthl1     | 0,999639 | 0,001755 | 0,217 | 0,218 | 1 |
| Zfp503    | 0,999744 | 0,001793 | 0,094 | 0,094 | 1 |

|         | p_val    | avg_logFC | pct.1 | pct.2 | p_val_adj |
|---------|----------|-----------|-------|-------|-----------|
| Gm8797  | 7,51E-22 | -0,6487   | 0,058 | 0,523 | 1,18E-17  |
| Psmb8   | 3,32E-14 | -1,80806  | 0,042 | 0,354 | 5,24E-10  |
| Tapbp1  | 9,11E-14 | -0,67438  | 0,027 | 0,308 | 1,44E-09  |
| Cd274   | 7,24E-13 | -1,41388  | 0,027 | 0,292 | 1,14E-08  |
| Xist    | 2,75E-11 | 1,8526    | 0,669 | 0,308 | 4,34E-07  |
| Psmb9   | 3,56E-11 | -0,95195  | 0,038 | 0,292 | 5,61E-07  |
| Psmb10  | 4,57E-11 | -0,95991  | 0,135 | 0,477 | 7,22E-07  |
| Gbp3    | 6,22E-11 | -0,96421  | 0,035 | 0,277 | 9,81E-07  |
| Tap2    | 7,15E-11 | -0,94485  | 0,054 | 0,323 | 1,13E-06  |
| Tap1    | 6,67E-10 | -0,99515  | 0,069 | 0,338 | 1,05E-05  |
| Psme1   | 1,19E-09 | -0,66256  | 0,173 | 0,508 | 1,88E-05  |
| Ube2l6  | 1,54E-09 | -0,27264  | 0,019 | 0,215 | 2,42E-05  |
| Gbp7    | 2,12E-09 | -1,23112  | 0,085 | 0,354 | 3,35E-05  |
| Parp10  | 2,77E-09 | -0,325    | 0,008 | 0,169 | 4,37E-05  |
| Ifit3   | 1E-08    | -1,16667  | 0,019 | 0,2   | 0,000158  |
| Cmpk2   | 4,14E-08 | -0,33488  | 0,023 | 0,2   | 0,000653  |
| Isg15   | 9,41E-08 | -0,40032  | 0     | 0,108 | 0,001484  |
| Parp14  | 1,32E-07 | -0,39561  | 0,015 | 0,169 | 0,00209   |
| Irgm1   | 1,35E-07 | -0,62362  | 0,208 | 0,523 | 0,002125  |
| Tmem140 | 1,63E-07 | -0,50867  | 0,027 | 0,2   | 0,002574  |
| Bst2    | 1,98E-07 | -0,87758  | 0,069 | 0,292 | 0,00312   |
| Oasl2   | 2,71E-07 | -0,46814  | 0,023 | 0,185 | 0,004283  |
| Igtp    | 3,01E-07 | -1,3938   | 0,112 | 0,354 | 0,004744  |
| Tvp23a  | 6,32E-07 | -0,26209  | 0,05  | 0,246 | 0,009977  |

|          | p_val    | avg_logFC | pct.1 | pct.2 | p_val_adj |
|----------|----------|-----------|-------|-------|-----------|
| Tsix     | 2,21E-09 | 0,495146  | 0,448 | 0,096 | 3,49E-05  |
| Hspa8    | 3,08E-09 | -0,33313  | 1     | 1     | 4,85E-05  |
| Xist     | 1,66E-08 | 0,841434  | 0,612 | 0,205 | 0,000261  |
| Cpox     | 2,02E-08 | -0,36404  | 1     | 1     | 0,000318  |
| Mt1      | 2,72E-08 | 0,756803  | 0,866 | 0,658 | 0,000429  |
| Serpind1 | 2,75E-07 | -0,628    | 0,343 | 0,678 | 0,004339  |
| Atp1b3   | 2,85E-07 | 0,438092  | 1     | 0,993 | 0,004494  |
| Ncam1    | 5,29E-07 | 0,260971  | 1     | 1     | 0,008344  |

1      ReactomeTerms[[i]]  
      No\_Genes



|         | p_val    | avg_logFC | pct.1 | pct.2 | p_val_adj |
|---------|----------|-----------|-------|-------|-----------|
| Tsix    | 6,39E-11 | 0,693147  | 0,625 | 0     | 1,01E-06  |
| Flrt3   | 6,31E-07 | 0,318454  | 0,375 | 0     | 0,009956  |
| Gm31805 | 6,31E-07 | 0,318454  | 0,375 | 0     | 0,009956  |
| Pitrm1  | 6,31E-07 | 0,318454  | 0,375 | 0     | 0,009956  |
| Gsto2   | 6,31E-07 | 0,318454  | 0,375 | 0     | 0,009956  |

|        | p_val    | avg_logFC | pct.1 | pct.2 | p_val_adj |
|--------|----------|-----------|-------|-------|-----------|
| Xist   | 2,41E-19 | 1,400388  | 0,844 | 0,391 | 3,81E-15  |
| Hspa8  | 1,5E-16  | -0,43974  | 1     | 1     | 2,37E-12  |
| Ddx3y  | 4,27E-10 | -0,53033  | 0,163 | 0,489 | 6,73E-06  |
| Apoe   | 9,76E-10 | -0,75145  | 0,966 | 1     | 1,54E-05  |
| Sept7  | 1,04E-08 | -0,33548  | 1     | 1     | 0,000164  |
| Sqle   | 1,41E-08 | 0,555746  | 0,782 | 0,496 | 0,000223  |
| Msmo1  | 6,01E-08 | 0,492094  | 0,973 | 0,782 | 0,000949  |
| Hmgcs1 | 9,91E-08 | 0,706599  | 0,973 | 0,932 | 0,001564  |
| Tsix   | 1,02E-07 | 0,4149    | 0,299 | 0,053 | 0,001603  |
| Tmod2  | 4,59E-07 | -0,37394  | 0,932 | 0,962 | 0,007242  |
| Idi1   | 4,92E-07 | 0,523064  | 0,81  | 0,579 | 0,007755  |

|          | p_val    | avg_logFC | pct.1 | pct.2 | p_val_adj |
|----------|----------|-----------|-------|-------|-----------|
| Gstp1    | 5,1E-15  | 0,917306  | 1     | 0,96  | 8,05E-11  |
| C4b      | 3,13E-13 | 0,820673  | 1     | 0,641 | 4,93E-09  |
| Gatm     | 1,47E-12 | -0,33053  | 1     | 1     | 2,33E-08  |
| Etv1     | 2,03E-12 | -0,569    | 0,966 | 0,996 | 3,21E-08  |
| Xist     | 2,05E-12 | 1,005354  | 0,655 | 0,191 | 3,23E-08  |
| Eml1     | 2,32E-12 | -0,67327  | 0,534 | 0,9   | 3,65E-08  |
| Cd63     | 4,29E-12 | 0,570363  | 1     | 0,976 | 6,77E-08  |
| Tubb4a   | 8,75E-12 | -0,53309  | 1     | 1     | 1,38E-07  |
| mt-Co1   | 1,51E-11 | -0,34353  | 1     | 1     | 2,38E-07  |
| Pex5l    | 3,02E-11 | -0,58985  | 1     | 1     | 4,77E-07  |
| Gstm7    | 9,34E-11 | -0,61032  | 0,862 | 0,972 | 1,47E-06  |
| Qdpr     | 1,02E-10 | -0,42445  | 1     | 1     | 1,61E-06  |
| Gng11    | 3,16E-10 | -0,5556   | 0,983 | 0,996 | 4,99E-06  |
| Sparc    | 4,58E-10 | 0,591209  | 0,897 | 0,594 | 7,22E-06  |
| mt-Nd4   | 2,23E-09 | -0,32688  | 1     | 1     | 3,52E-05  |
| Ppp1r14a | 2,67E-09 | -0,36966  | 1     | 1     | 4,21E-05  |
| Slc44a1  | 3,97E-09 | 0,35717   | 1     | 1     | 6,26E-05  |
| mt-Cytb  | 7,1E-09  | -0,3127   | 1     | 1     | 0,000112  |
| Spock3   | 7,4E-09  | -0,48541  | 0,845 | 0,972 | 0,000117  |
| H2-D1    | 8,09E-09 | 0,48963   | 0,879 | 0,566 | 0,000128  |
| S100a16  | 9,07E-09 | -0,44297  | 0,983 | 1     | 0,000143  |
| Atg4c    | 1,34E-08 | -0,41723  | 0,362 | 0,765 | 0,000211  |
| B2m      | 3,11E-08 | 0,384635  | 0,845 | 0,482 | 0,000491  |
| Slc38a2  | 3,74E-08 | -0,45938  | 1     | 1     | 0,00059   |
| Ctsk     | 5,33E-08 | -0,45809  | 0,241 | 0,625 | 0,000841  |
| Fos      | 7E-08    | 0,506909  | 0,81  | 0,394 | 0,001105  |
| Anxa5    | 1,07E-07 | 0,457369  | 0,81  | 0,458 | 0,001692  |
| Prnp     | 1,37E-07 | 0,2698    | 1     | 1     | 0,002162  |
| Ndrg2    | 1,75E-07 | -0,53333  | 0,155 | 0,526 | 0,002757  |
| Psat1    | 1,96E-07 | -0,3477   | 0,966 | 0,996 | 0,003092  |
| Oaz1     | 2,72E-07 | -0,32798  | 1     | 0,996 | 0,00429   |
| Calm1    | 2,81E-07 | -0,31177  | 1     | 1     | 0,004429  |
| Sept7    | 2,83E-07 | -0,30956  | 1     | 1     | 0,004457  |
| Ndrg1    | 3,96E-07 | 0,286817  | 1     | 1     | 0,006247  |
| Psap     | 5,46E-07 | 0,328064  | 1     | 1     | 0,008606  |
| Asrgl1   | 5,84E-07 | -0,43211  | 0,621 | 0,884 | 0,009211  |
| Ankub1   | 5,92E-07 | -0,47266  | 0,259 | 0,629 | 0,009339  |

1      ReactomeTerms[[i]]  
      No\_Genes

|           | p_val    | avg_logFC | pct.1 | pct.2 | p_val_adj |
|-----------|----------|-----------|-------|-------|-----------|
| Cd81      | 3,61E-08 | 0,277028  | 1     | 1     | 0,000569  |
| Cisd1     | 1,93E-07 | 0,292458  | 0,974 | 0,89  | 0,003044  |
| H2-D1     | 3,22E-07 | -0,61542  | 0,479 | 0,726 | 0,005079  |
| Fos       | 3,64E-07 | -0,98254  | 0,359 | 0,623 | 0,005739  |
| Hist1h2bc | 5,33E-07 | 0,351682  | 0,94  | 0,877 | 0,008411  |
| Selenof   | 5,45E-07 | 0,27004   | 0,957 | 0,966 | 0,008597  |

|           | p_val    | avg_logFC | pct.1 | pct.2 | p_val_adj |
|-----------|----------|-----------|-------|-------|-----------|
| Slc34a3   | 9,64E-10 | 0,77319   | 0,833 | 0,031 | 1,52E-05  |
| 3110082J2 | 8,69E-09 | 0,405465  | 0,5   | 0     | 0,000137  |
| Gsto2     | 8,69E-09 | 0,405465  | 0,5   | 0     | 0,000137  |
| Nppc      | 1,17E-07 | 0,48052   | 0,667 | 0,031 | 0,001838  |
| Gm996     | 1,17E-07 | 0,48052   | 0,667 | 0,031 | 0,001838  |
| Serpind1  | 1,51E-07 | 0,561015  | 0,667 | 0,031 | 0,002381  |
| Sgsm3     | 1,89E-07 | 0,465705  | 0,667 | 0,031 | 0,002976  |
| Aff3      | 1,89E-07 | 0,451106  | 0,667 | 0,031 | 0,002976  |
| Mest      | 3,01E-07 | 0,394753  | 0,667 | 0,031 | 0,004754  |

|        | p_val    | avg_logFC | pct.1 | pct.2 | p_val_adj |
|--------|----------|-----------|-------|-------|-----------|
| Pdlim2 | 1,27E-08 | 0,494462  | 0,989 | 0,977 | 0,0002    |
| H2-D1  | 2,13E-08 | -1,04767  | 0,685 | 0,887 | 0,000336  |
| B2m    | 3,24E-08 | -0,97289  | 0,618 | 0,85  | 0,000512  |

|          | p_val    | avg_logFC | pct.1 | pct.2 | p_val_adj |
|----------|----------|-----------|-------|-------|-----------|
| Scnm1    | 2,99E-11 | 0,298091  | 0,676 | 0,398 | 4,72E-07  |
| AY036118 | 1,08E-07 | -0,25534  | 0,947 | 0,976 | 0,00171   |



|          | p_val    | avg_logFC | pct.1 | pct.2 | p_val_adj |
|----------|----------|-----------|-------|-------|-----------|
| Abca1    | 5,11E-11 | -0,82082  | 0,158 | 0,8   | 8,06E-07  |
| Fxyd7    | 4,77E-10 | -0,97548  | 0,05  | 0,467 | 7,53E-06  |
| Ptgr1    | 3,93E-09 | -0,28768  | 0     | 0,133 | 6,2E-05   |
| Rnf219   | 8,29E-09 | -0,33055  | 0,038 | 0,4   | 0,000131  |
| Kcna4    | 1,97E-08 | -0,26863  | 0,015 | 0,267 | 0,000311  |
| Fxyd1    | 4,52E-08 | -1,35148  | 0,127 | 0,6   | 0,000713  |
| Gfap     | 8,13E-08 | -0,4296   | 0,065 | 0,467 | 0,001283  |
| Tmem176a | 2,49E-07 | -0,72055  | 0,1   | 0,533 | 0,003932  |
| Apoe     | 2,95E-07 | -1,39594  | 0,946 | 1     | 0,004652  |

|          | p_val    | avg_logFC | pct.1 | pct.2 | p_val_adj |
|----------|----------|-----------|-------|-------|-----------|
| B2m      | 4,5E-15  | 1,244604  | 0,94  | 0,487 | 7,09E-11  |
| Ncam1    | 7,56E-12 | 0,410157  | 1     | 1     | 1,19E-07  |
| H2-D1    | 5,32E-11 | 1,14695   | 0,851 | 0,479 | 8,39E-07  |
| Atp1a1   | 8,22E-11 | 0,412963  | 1     | 1     | 1,3E-06   |
| Dip2a    | 9,56E-11 | 0,483992  | 1     | 0,966 | 1,51E-06  |
| Serpind1 | 1,01E-10 | -0,7342   | 0,343 | 0,803 | 1,59E-06  |
| Shisa4   | 2,91E-10 | -0,54986  | 0,94  | 1     | 4,59E-06  |
| Bmyc     | 3,94E-10 | -0,55461  | 0,657 | 0,923 | 6,21E-06  |
| Sox11    | 7,19E-10 | 0,751188  | 0,403 | 0,043 | 1,13E-05  |
| Sys1     | 9,13E-10 | -0,49293  | 0,97  | 0,966 | 1,44E-05  |
| Sptbn1   | 1,02E-09 | 0,559562  | 1     | 0,915 | 1,61E-05  |
| Inf2     | 1,16E-09 | 0,459289  | 0,985 | 0,957 | 1,83E-05  |
| Tulp4    | 1,18E-09 | 0,439698  | 1     | 1     | 1,87E-05  |
| C4b      | 1,36E-09 | 0,755365  | 0,985 | 0,744 | 2,15E-05  |
| Npc1     | 1,36E-09 | 0,432136  | 1     | 0,974 | 2,15E-05  |
| Selenof  | 1,55E-09 | -0,46053  | 0,91  | 0,957 | 2,45E-05  |
| Plekhb1  | 2,13E-09 | 0,578697  | 1     | 1     | 3,37E-05  |
| Hspa8    | 2,75E-09 | -0,32147  | 1     | 1     | 4,34E-05  |
| Gpc1     | 4,57E-09 | 0,504991  | 0,731 | 0,299 | 7,2E-05   |
| Rexo2    | 6,14E-09 | -0,47824  | 0,761 | 0,949 | 9,68E-05  |
| Atp5f1   | 7,43E-09 | -0,44251  | 0,925 | 0,991 | 0,000117  |
| AY036118 | 9,91E-09 | 0,591383  | 1     | 0,769 | 0,000156  |
| Rpl13a   | 1,01E-08 | 0,422307  | 0,985 | 0,872 | 0,000159  |
| Cox5b    | 1,27E-08 | -0,38801  | 0,925 | 0,991 | 0,0002    |
| Cisd1    | 1,63E-08 | -0,42894  | 0,791 | 0,974 | 0,000257  |
| S100a16  | 1,63E-08 | -0,44922  | 0,955 | 1     | 0,000257  |
| Pacs2    | 1,9E-08  | 0,389276  | 1     | 1     | 0,000299  |
| Sort1    | 1,96E-08 | 0,353612  | 1     | 1     | 0,000309  |
| Hopx     | 2,13E-08 | -0,4649   | 0,97  | 1     | 0,000336  |
| Usmg5    | 2,21E-08 | -0,43983  | 0,701 | 0,949 | 0,000348  |
| Myrf     | 2,49E-08 | 0,373178  | 0,985 | 0,991 | 0,000392  |
| Ppp1r14a | 3,76E-08 | -0,37445  | 0,985 | 1     | 0,000592  |
| Bhlhe40  | 4,42E-08 | 0,350467  | 0,358 | 0,051 | 0,000698  |
| Grhpr    | 4,75E-08 | -0,4983   | 0,701 | 0,915 | 0,000749  |
| Junb     | 4,84E-08 | 0,913498  | 0,507 | 0,154 | 0,000763  |
| Ndufab1  | 6,31E-08 | -0,42178  | 0,687 | 0,94  | 0,000995  |
| Tmcc3    | 6,67E-08 | 0,368289  | 0,985 | 1     | 0,001053  |
| Abca2    | 7,29E-08 | 0,315443  | 1     | 1     | 0,00115   |
| Eef2     | 7,43E-08 | 0,338267  | 1     | 1     | 0,001172  |
| Psmb2    | 7,62E-08 | -0,40019  | 0,836 | 0,957 | 0,001203  |
| Arhgap23 | 9,6E-08  | 0,452692  | 0,97  | 0,897 | 0,001515  |
| Eif1     | 9,68E-08 | -0,35536  | 1     | 1     | 0,001527  |
| Taok1    | 9,96E-08 | 0,472064  | 0,94  | 0,795 | 0,001571  |
| Phlda3   | 1,13E-07 | -0,49026  | 0,672 | 0,88  | 0,001791  |
| Trf      | 1,23E-07 | -0,27952  | 1     | 1     | 0,00194   |
| Fez1     | 1,23E-07 | -0,35185  | 1     | 1     | 0,001946  |
| Ypel3    | 1,24E-07 | -0,40569  | 0,776 | 0,966 | 0,001959  |
| Cox5a    | 1,26E-07 | -0,43396  | 0,701 | 0,932 | 0,001994  |
| Sept9    | 1,27E-07 | 0,461089  | 0,746 | 0,436 | 0,002004  |
| Cox6c    | 1,28E-07 | -0,33128  | 0,985 | 0,991 | 0,002027  |
| Tmem50a  | 1,3E-07  | -0,33464  | 0,955 | 1     | 0,002044  |

|          |          |          |       |       |          |
|----------|----------|----------|-------|-------|----------|
| Tspan3   | 1,31E-07 | -0,36603 | 0,925 | 1     | 0,002074 |
| Nipa1    | 1,36E-07 | -0,39889 | 0,91  | 0,983 | 0,00214  |
| Chchd2   | 1,39E-07 | -0,31433 | 1     | 1     | 0,002192 |
| Gstm7    | 1,56E-07 | -0,41907 | 0,866 | 0,991 | 0,002459 |
| Prdx1    | 1,64E-07 | -0,2833  | 1     | 1     | 0,002585 |
| Slc25a27 | 1,66E-07 | -0,57637 | 0,672 | 0,863 | 0,002626 |
| Spcs1    | 1,7E-07  | -0,42095 | 0,776 | 0,923 | 0,002685 |
| Mt1      | 1,83E-07 | 0,784698 | 0,866 | 0,692 | 0,002885 |
| Ndufa7   | 1,91E-07 | -0,31593 | 0,791 | 0,974 | 0,003007 |
| Tmem258  | 2,07E-07 | -0,49593 | 0,701 | 0,88  | 0,003272 |
| Rnf130   | 2,16E-07 | -0,33213 | 1     | 1     | 0,003401 |
| Pkp4     | 2,48E-07 | 0,552366 | 0,94  | 0,752 | 0,003911 |
| Fos      | 2,54E-07 | 1,58391  | 0,687 | 0,359 | 0,004006 |
| Egr1     | 2,82E-07 | 1,301922 | 0,299 | 0,034 | 0,004453 |
| Dhcr24   | 3,44E-07 | 0,784601 | 0,791 | 0,573 | 0,005423 |
| Gng11    | 3,64E-07 | -0,41905 | 1     | 0,991 | 0,005743 |
| Mrps33   | 3,91E-07 | -0,47507 | 0,701 | 0,872 | 0,006167 |
| Scarb2   | 3,93E-07 | 0,346034 | 1     | 1     | 0,006208 |
| H2-K1    | 4,19E-07 | 0,777267 | 0,597 | 0,274 | 0,006607 |
| Tfrc     | 4,2E-07  | -0,41668 | 0,284 | 0,667 | 0,006631 |
| Gstm5    | 4,22E-07 | -0,49461 | 0,94  | 0,983 | 0,006659 |
| Etv1     | 4,45E-07 | -0,37361 | 0,97  | 0,991 | 0,007022 |
| Brd2     | 4,47E-07 | 0,544903 | 0,851 | 0,675 | 0,007056 |
| Mrps21   | 4,54E-07 | -0,33384 | 0,582 | 0,915 | 0,007166 |
| Cd63     | 4,56E-07 | 0,374134 | 0,925 | 0,564 | 0,007188 |
| Anks1b   | 4,71E-07 | 0,485161 | 0,97  | 0,735 | 0,007428 |
| Kif5a    | 4,89E-07 | 0,454827 | 0,672 | 0,342 | 0,007714 |
| Edil3    | 5,4E-07  | 0,27271  | 1     | 1     | 0,008518 |
| Adh5     | 5,64E-07 | -0,38391 | 0,806 | 0,94  | 0,008905 |
| Glo1     | 5,81E-07 | -0,43224 | 0,687 | 0,932 | 0,009164 |
| 5031439G | 6,2E-07  | 0,350832 | 0,97  | 0,88  | 0,009774 |
| Dock7    | 6,22E-07 | 0,476136 | 0,731 | 0,41  | 0,00981  |
| Glod4    | 6,33E-07 | -0,40086 | 0,761 | 0,897 | 0,009981 |

1      ReactomeTerms[[i]]  
      No\_Genes

|          | p_val    | avg_logFC | pct.1 | pct.2 | p_val_adj |
|----------|----------|-----------|-------|-------|-----------|
| Apoe     | 1,47E-18 | -1,29259  | 0,966 | 0,978 | 2,31E-14  |
| B2m      | 7,51E-18 | 1,165618  | 0,98  | 0,618 | 1,18E-13  |
| Aplp1    | 6,87E-16 | -0,43147  | 1     | 1     | 1,08E-11  |
| H2-D1    | 2,03E-15 | 1,194204  | 0,952 | 0,685 | 3,2E-11   |
| AY036118 | 1,3E-14  | 0,686309  | 1     | 0,933 | 2,06E-10  |
| H2-K1    | 4,34E-14 | 1,008112  | 0,762 | 0,281 | 6,85E-10  |
| Hmgcs1   | 2E-12    | 1,049022  | 0,973 | 0,91  | 3,15E-08  |
| Tfrc     | 1,03E-11 | -0,40038  | 0,17  | 0,629 | 1,63E-07  |
| Pdlim2   | 1,13E-11 | -0,61391  | 0,959 | 0,989 | 1,78E-07  |
| Opalin   | 1,68E-10 | -0,59544  | 0,952 | 0,978 | 2,64E-06  |
| Sqle     | 8,14E-10 | 0,694601  | 0,782 | 0,449 | 1,28E-05  |
| Itih3    | 9,18E-10 | -0,3998   | 0,075 | 0,404 | 1,45E-05  |
| Hspa8    | 2,43E-09 | -0,37756  | 1     | 0,989 | 3,83E-05  |
| Masp1    | 4,18E-09 | -0,41988  | 0,116 | 0,461 | 6,59E-05  |
| Sept4    | 6,39E-09 | -0,39597  | 1     | 0,989 | 0,000101  |
| Pmp22    | 9,34E-09 | 0,496511  | 0,993 | 0,809 | 0,000147  |
| Idi1     | 3,61E-08 | 0,730779  | 0,81  | 0,517 | 0,000569  |
| Dhcr24   | 3,9E-08  | 0,647321  | 0,68  | 0,337 | 0,000615  |
| Ncam1    | 4,16E-08 | 0,339156  | 1     | 0,989 | 0,000656  |
| Ppp1r14a | 6,14E-08 | -0,39144  | 1     | 0,989 | 0,000968  |
| Msmo1    | 6,51E-08 | 0,578367  | 0,973 | 0,73  | 0,001027  |
| Mag      | 7,21E-08 | -0,3249   | 1     | 0,989 | 0,001138  |
| Gfap     | 7,35E-08 | -0,39236  | 0,088 | 0,371 | 0,00116   |
| Cwc25    | 8,76E-08 | -0,31839  | 0,156 | 0,494 | 0,001382  |
| Enpp6    | 9,83E-08 | 0,38713   | 0,966 | 0,596 | 0,00155   |
| Sept7    | 2,13E-07 | -0,35071  | 1     | 0,989 | 0,003355  |
| S100b    | 2,44E-07 | 0,674981  | 0,891 | 0,685 | 0,003851  |
| 1500011B | 2,99E-07 | -0,29114  | 0,136 | 0,449 | 0,004718  |
| Bin1     | 4,26E-07 | -0,34032  | 0,993 | 1     | 0,006722  |
| Hsp90aa1 | 5,29E-07 | -0,32277  | 1     | 0,989 | 0,008352  |
| Tmem163  | 5,3E-07  | -0,39218  | 0,163 | 0,449 | 0,008364  |

|          | p_val    | avg_logFC | pct.1 | pct.2 | p_val_adj |
|----------|----------|-----------|-------|-------|-----------|
| B2m      | 6,09E-16 | 1,065993  | 0,845 | 0,381 | 9,6E-12   |
| C4b      | 7,97E-14 | 0,847311  | 1     | 0,537 | 1,26E-09  |
| Gstm7    | 2,51E-13 | -0,68616  | 0,862 | 0,967 | 3,97E-09  |
| H2-D1    | 8E-13    | 1,220854  | 0,879 | 0,508 | 1,26E-08  |
| Fos      | 9,07E-13 | 0,854886  | 0,81  | 0,303 | 1,43E-08  |
| Aplp1    | 2,46E-12 | -0,30493  | 1     | 1     | 3,88E-08  |
| Gng11    | 2,47E-12 | -0,65626  | 0,983 | 0,996 | 3,9E-08   |
| Tubb4a   | 6,88E-12 | -0,52051  | 1     | 1     | 1,09E-07  |
| Tuba1a   | 1,05E-11 | -0,56438  | 1     | 1     | 1,66E-07  |
| Egr1     | 1,43E-11 | 0,463739  | 0,328 | 0,041 | 2,26E-07  |
| Eml1     | 1,77E-11 | -0,65682  | 0,534 | 0,885 | 2,8E-07   |
| Edil3    | 2,22E-11 | 0,397961  | 1     | 1     | 3,5E-07   |
| AY036118 | 2,66E-11 | 0,819474  | 1     | 0,947 | 4,19E-07  |
| Etv1     | 3,1E-11  | -0,53584  | 0,966 | 1     | 4,89E-07  |
| Ppp1r14a | 5,71E-11 | -0,42711  | 1     | 1     | 9E-07     |
| Gstp1    | 7,38E-11 | 0,724706  | 1     | 0,992 | 1,16E-06  |
| Eif1     | 1,46E-10 | -0,29239  | 1     | 1     | 2,31E-06  |
| Psap     | 1,67E-10 | 0,443951  | 1     | 1     | 2,64E-06  |
| mt-Co1   | 1,69E-10 | -0,30513  | 1     | 1     | 2,67E-06  |
| Cd63     | 3,39E-10 | 0,507862  | 1     | 0,963 | 5,35E-06  |
| Tfrc     | 4,01E-10 | -0,53028  | 0,138 | 0,598 | 6,32E-06  |
| S100a16  | 6,8E-10  | -0,49202  | 0,983 | 1     | 1,07E-05  |
| Spock3   | 7,95E-10 | -0,52931  | 0,845 | 0,988 | 1,25E-05  |
| Oaz1     | 1,89E-09 | -0,37731  | 1     | 0,996 | 2,98E-05  |
| Calm1    | 2,03E-09 | -0,35788  | 1     | 1     | 3,2E-05   |
| Pex5l    | 2,64E-09 | -0,50552  | 1     | 1     | 4,17E-05  |
| Qdpr     | 3,43E-09 | -0,37933  | 1     | 1     | 5,41E-05  |
| Epb41l3  | 7,82E-09 | -0,38946  | 0,983 | 0,988 | 0,000123  |
| H2-K1    | 8,51E-09 | 0,764092  | 0,707 | 0,357 | 0,000134  |
| Prdx1    | 1,14E-08 | -0,35338  | 1     | 1     | 0,00018   |
| Mif      | 1,29E-08 | -0,52472  | 0,948 | 0,984 | 0,000203  |
| Ywhaq    | 2,19E-08 | -0,28137  | 1     | 1     | 0,000345  |
| Sparc    | 2,25E-08 | 0,538191  | 0,897 | 0,623 | 0,000355  |
| Junb     | 4,82E-08 | 0,542576  | 0,517 | 0,18  | 0,000761  |
| Slc44a1  | 5,13E-08 | 0,325695  | 1     | 1     | 0,00081   |
| Cyp2j6   | 5,66E-08 | -0,44098  | 0,276 | 0,721 | 0,000892  |
| Gpc1     | 5,94E-08 | 0,503905  | 0,69  | 0,361 | 0,000937  |
| Cfl1     | 8,62E-08 | -0,26802  | 1     | 1     | 0,001359  |
| Bpgm     | 9,21E-08 | -0,32954  | 0,983 | 1     | 0,001453  |
| Fam102a  | 1,02E-07 | 0,372138  | 1     | 0,885 | 0,001607  |
| Cox6c    | 1,16E-07 | -0,27561  | 1     | 1     | 0,001829  |
| Atg4c    | 1,29E-07 | -0,41566  | 0,362 | 0,738 | 0,002036  |
| Ndrg2    | 1,35E-07 | -0,52968  | 0,155 | 0,533 | 0,002136  |
| Anxa5    | 1,4E-07  | 0,470757  | 0,81  | 0,512 | 0,002203  |
| Uqcr10   | 1,58E-07 | -0,33256  | 0,948 | 0,992 | 0,002487  |
| Sept7    | 1,82E-07 | -0,31199  | 1     | 1     | 0,002872  |
| Mt1      | 1,84E-07 | 0,909965  | 0,983 | 0,934 | 0,002901  |
| Psat1    | 1,97E-07 | -0,34959  | 0,966 | 1     | 0,003114  |
| Gab1     | 2,15E-07 | 0,399967  | 0,966 | 0,959 | 0,00339   |
| Prnp     | 2,52E-07 | 0,254135  | 1     | 1     | 0,003972  |
| Apoe     | 2,86E-07 | -0,73949  | 1     | 1     | 0,004516  |

|        |          |          |       |       |          |
|--------|----------|----------|-------|-------|----------|
| Erbin  | 3,08E-07 | 0,495243 | 0,983 | 0,967 | 0,004858 |
| Hint1  | 4,9E-07  | -0,29113 | 0,983 | 0,996 | 0,007734 |
| Il18   | 4,93E-07 | -0,37225 | 0,448 | 0,779 | 0,007775 |
| Ankub1 | 4,99E-07 | -0,36457 | 0,259 | 0,664 | 0,007872 |
| Fam96a | 5,91E-07 | -0,37537 | 0,19  | 0,574 | 0,00932  |
